# Supplementary material for: Integrated view and comparative analysis of baseline protein expression in mouse and rat tissues
Source: PubMed Central journal article supplement (PMC9246241; doi:10.1371/journal.pcbi.1010174), 2022-06-17

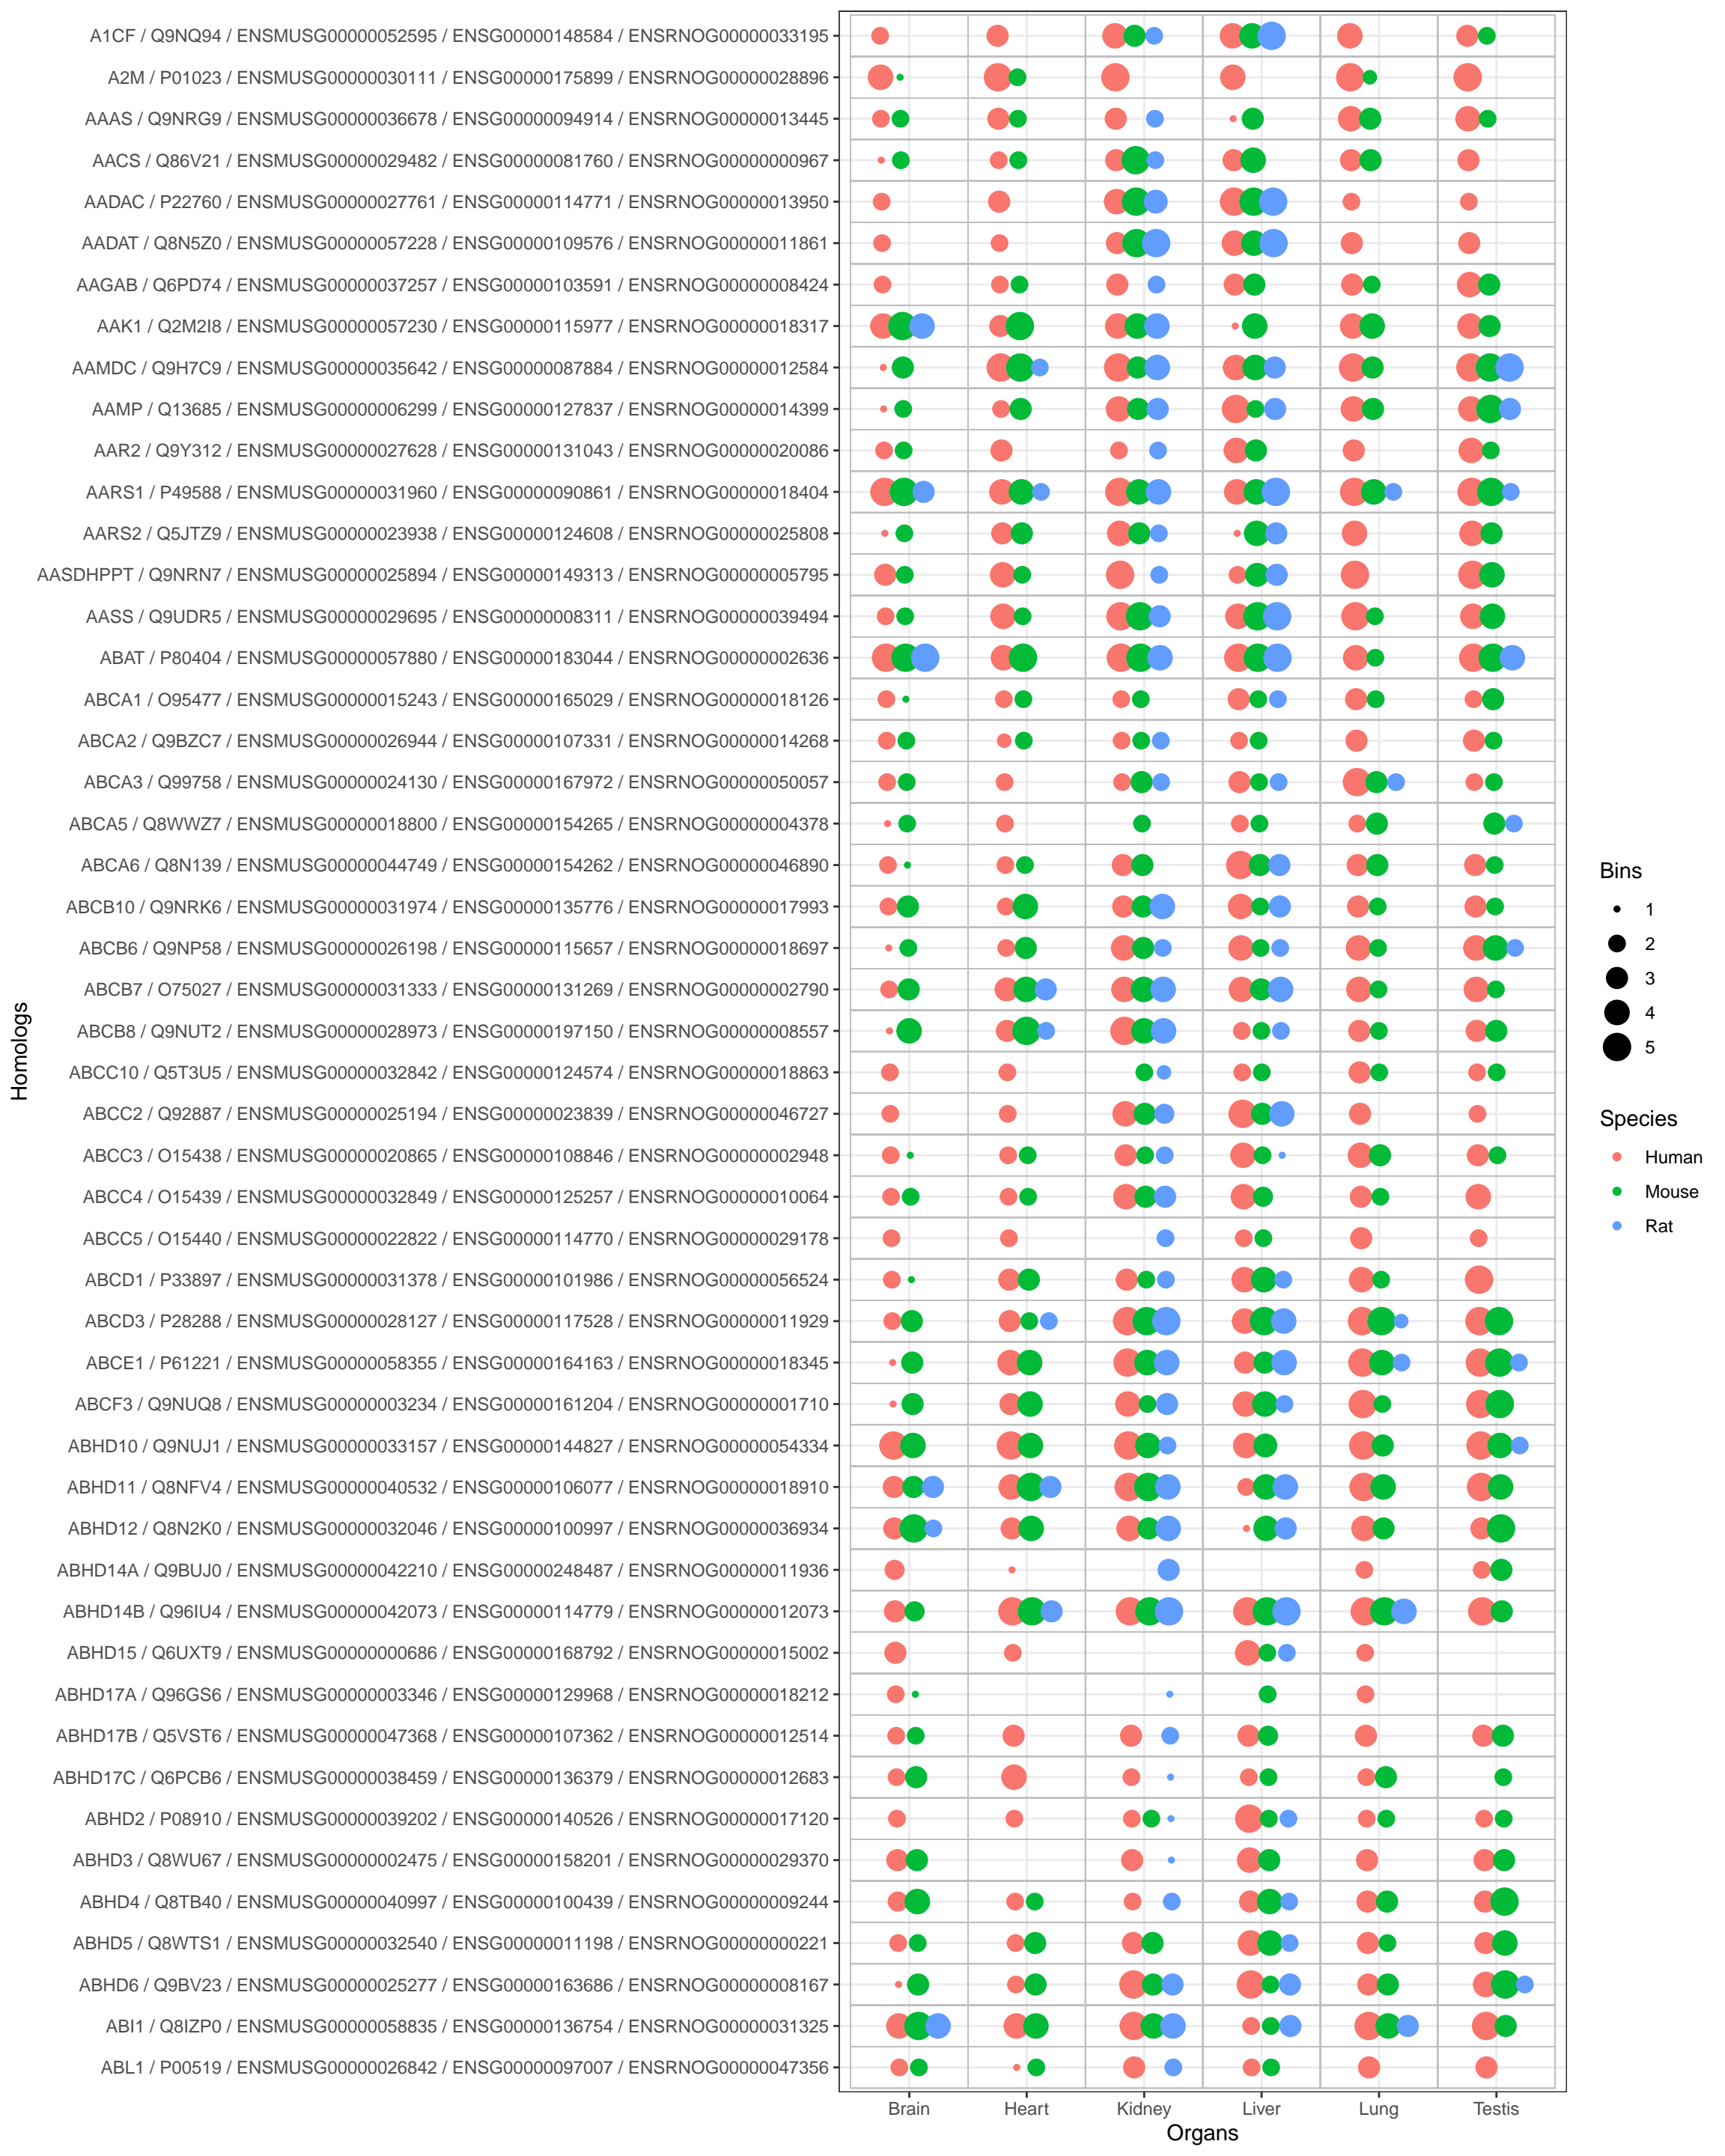

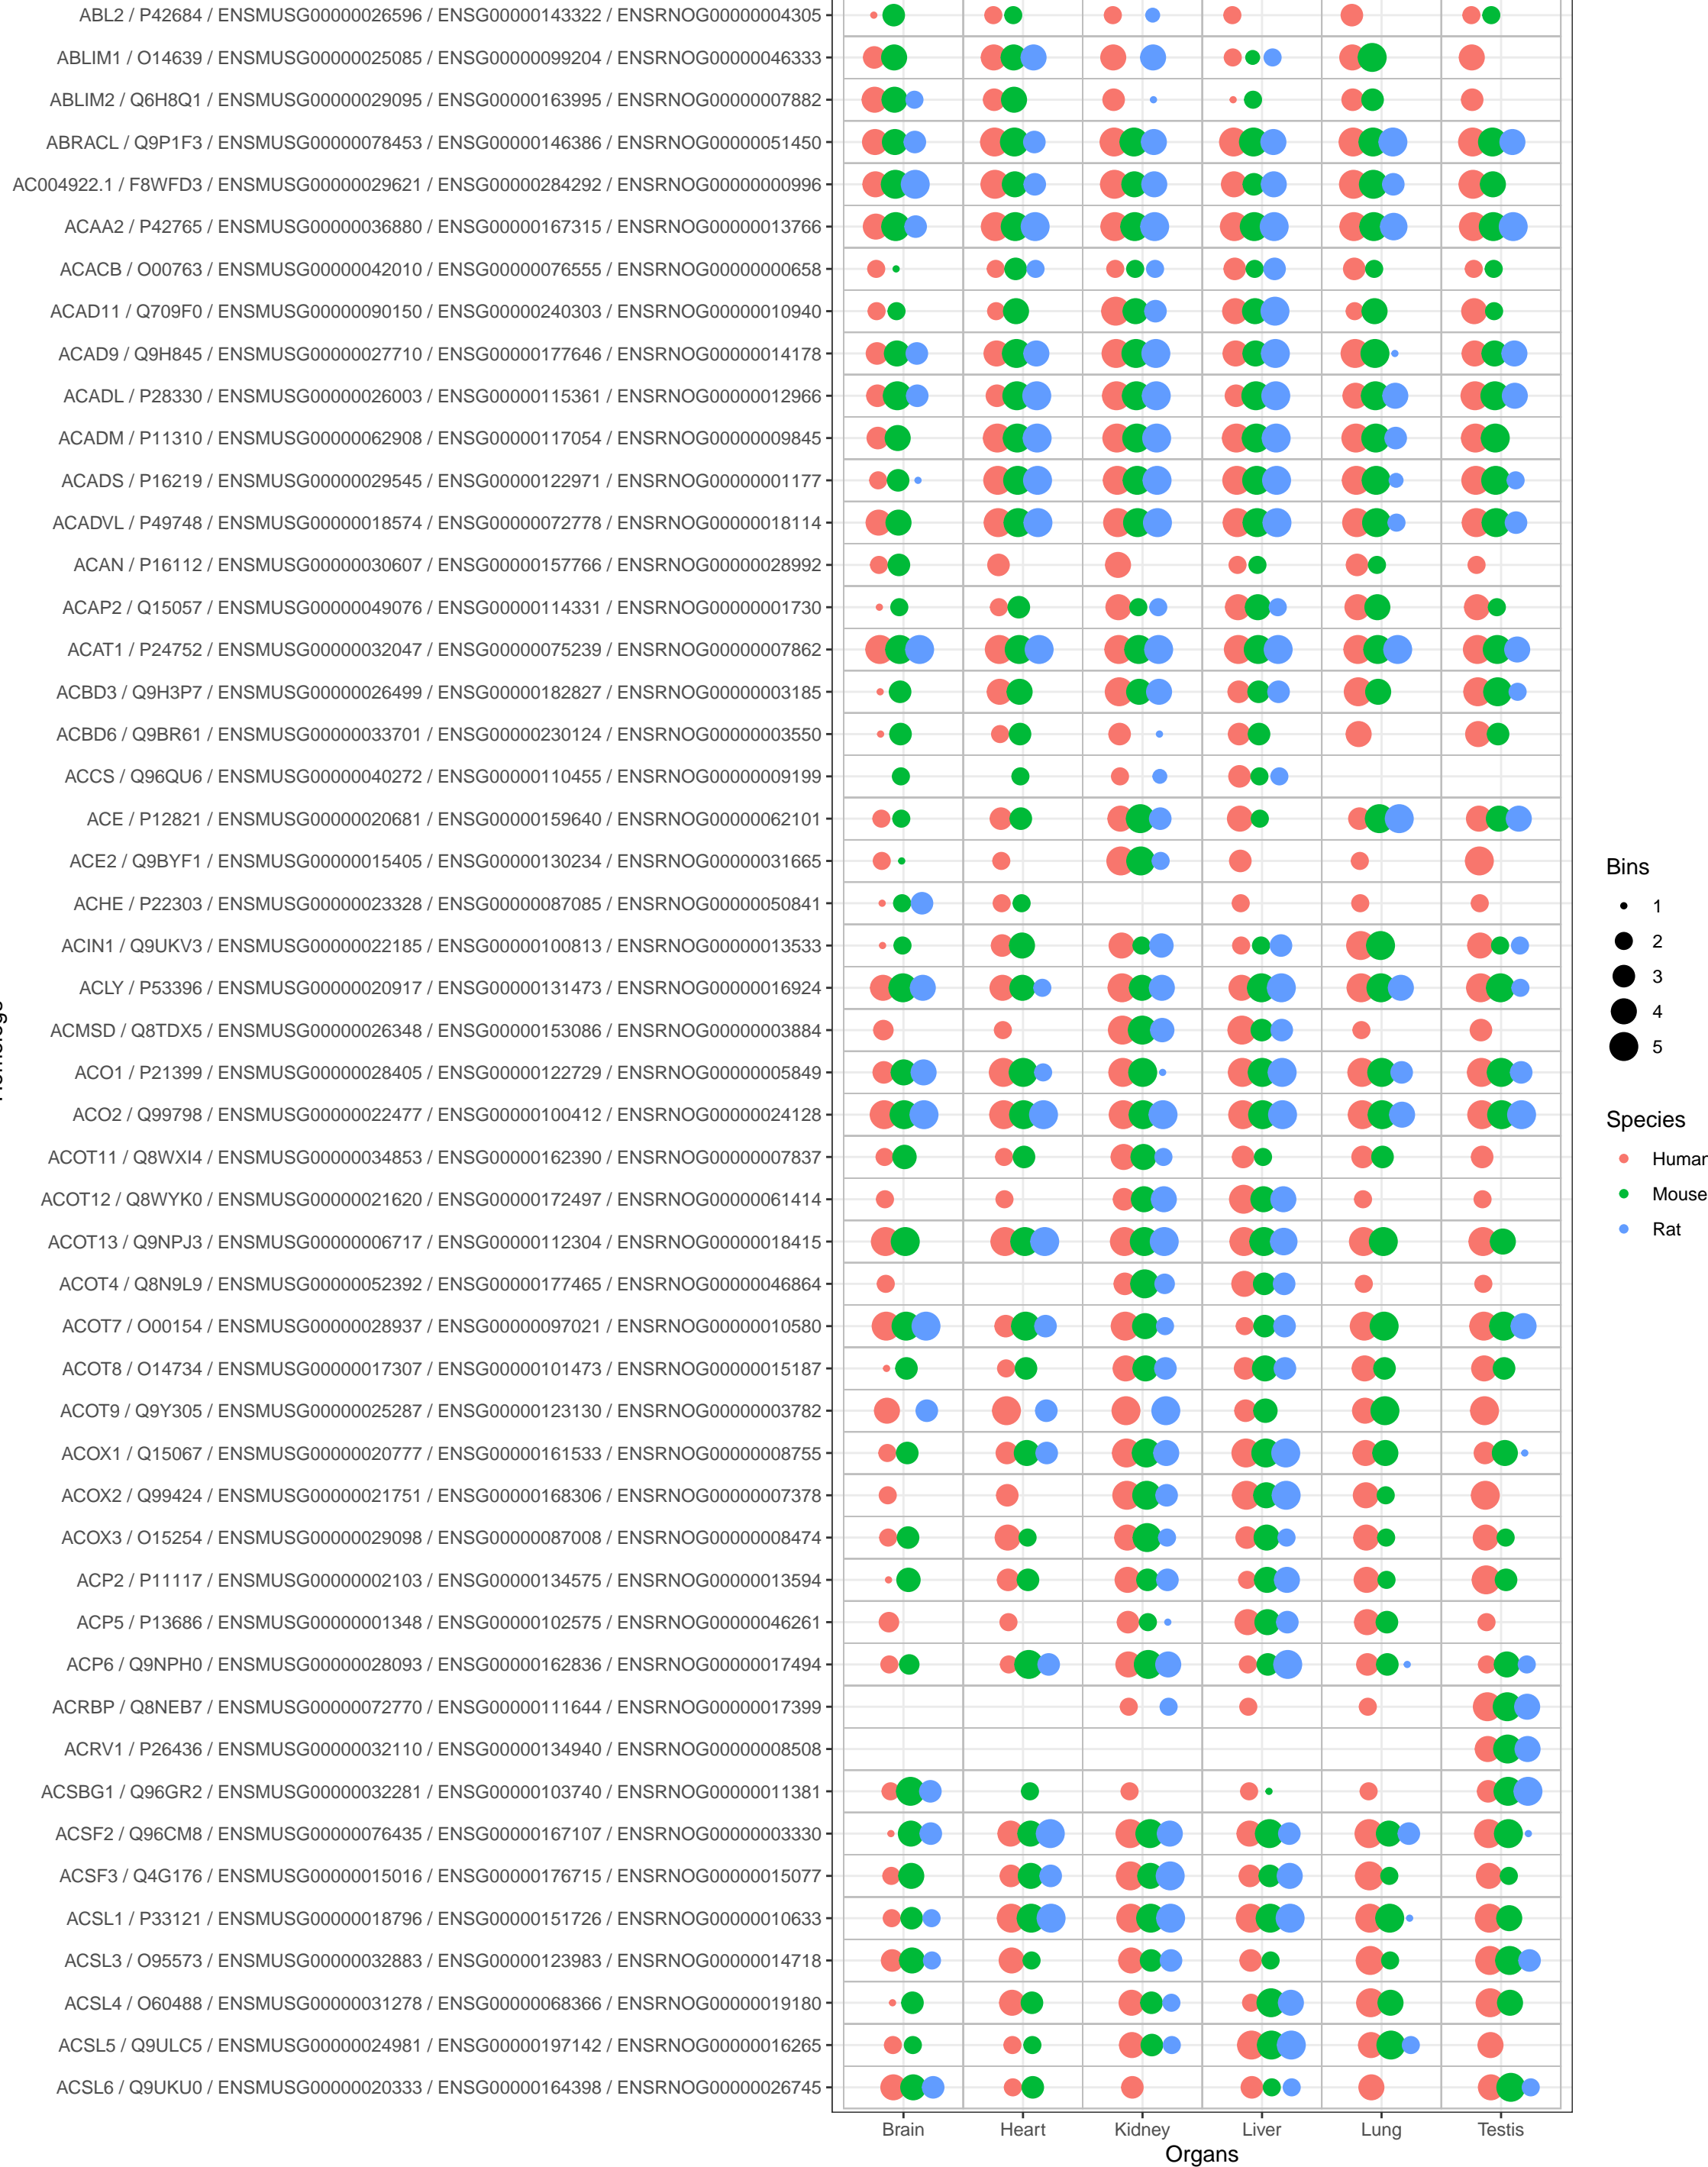

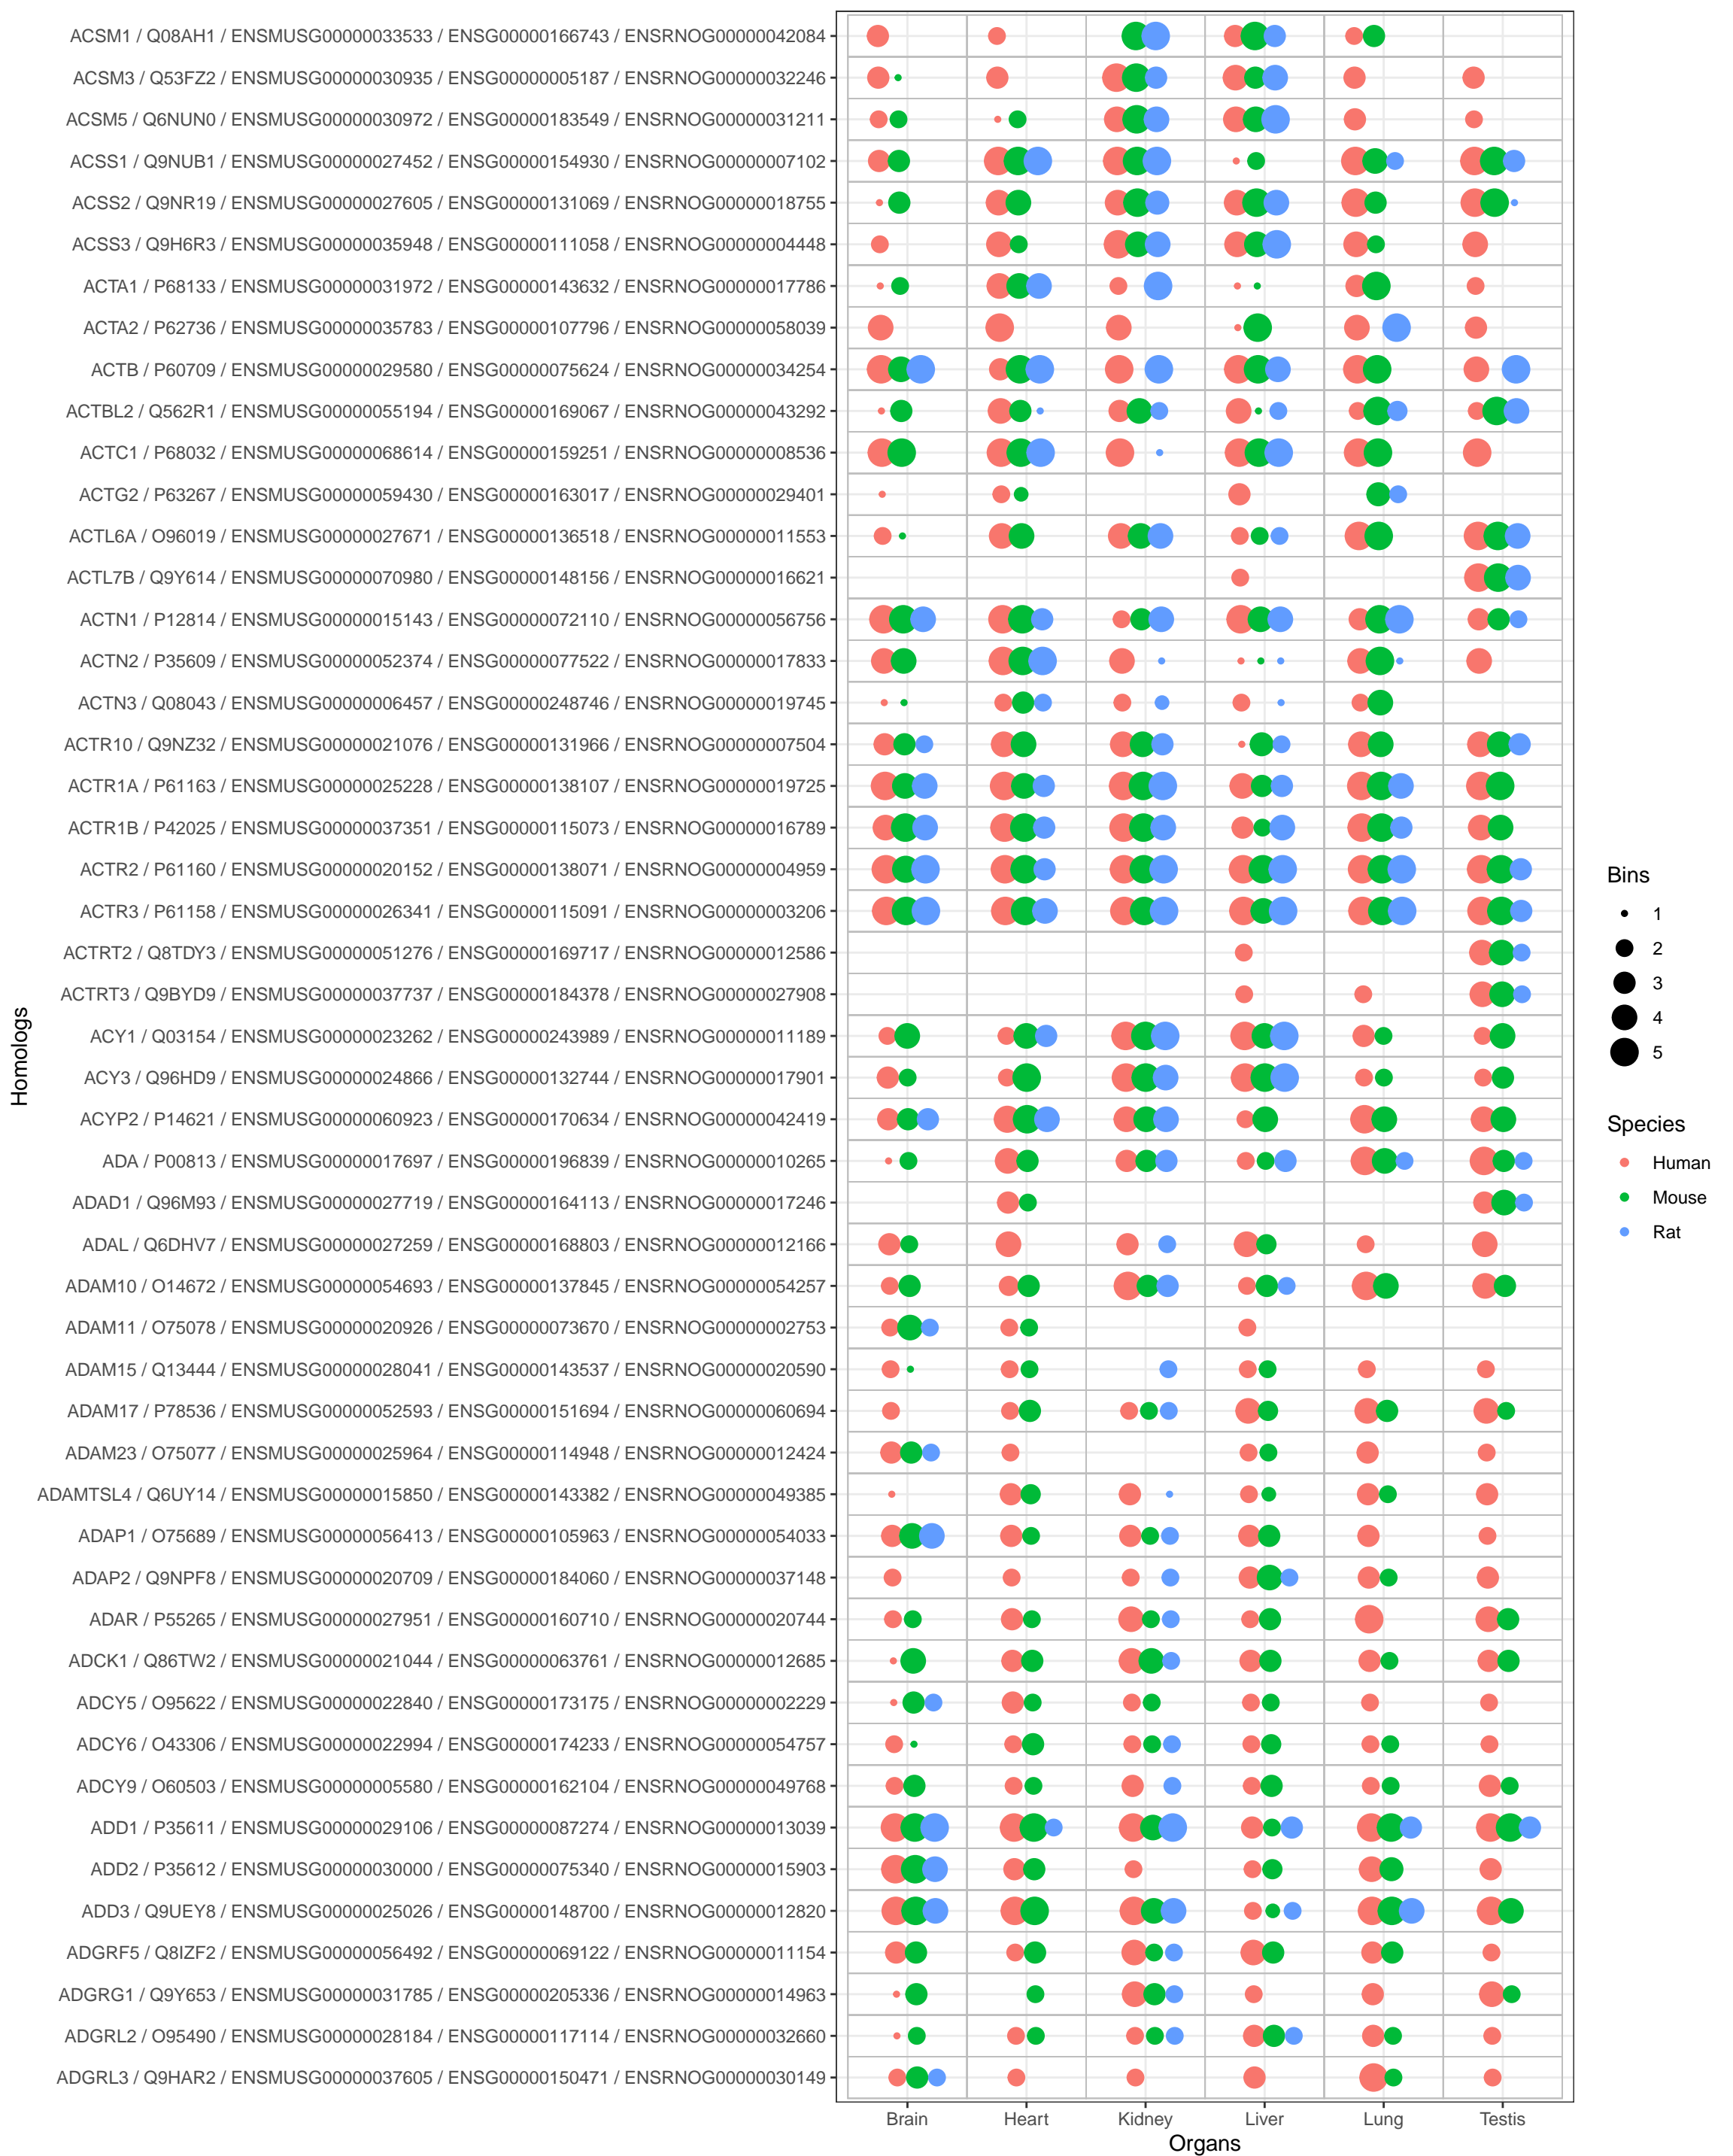

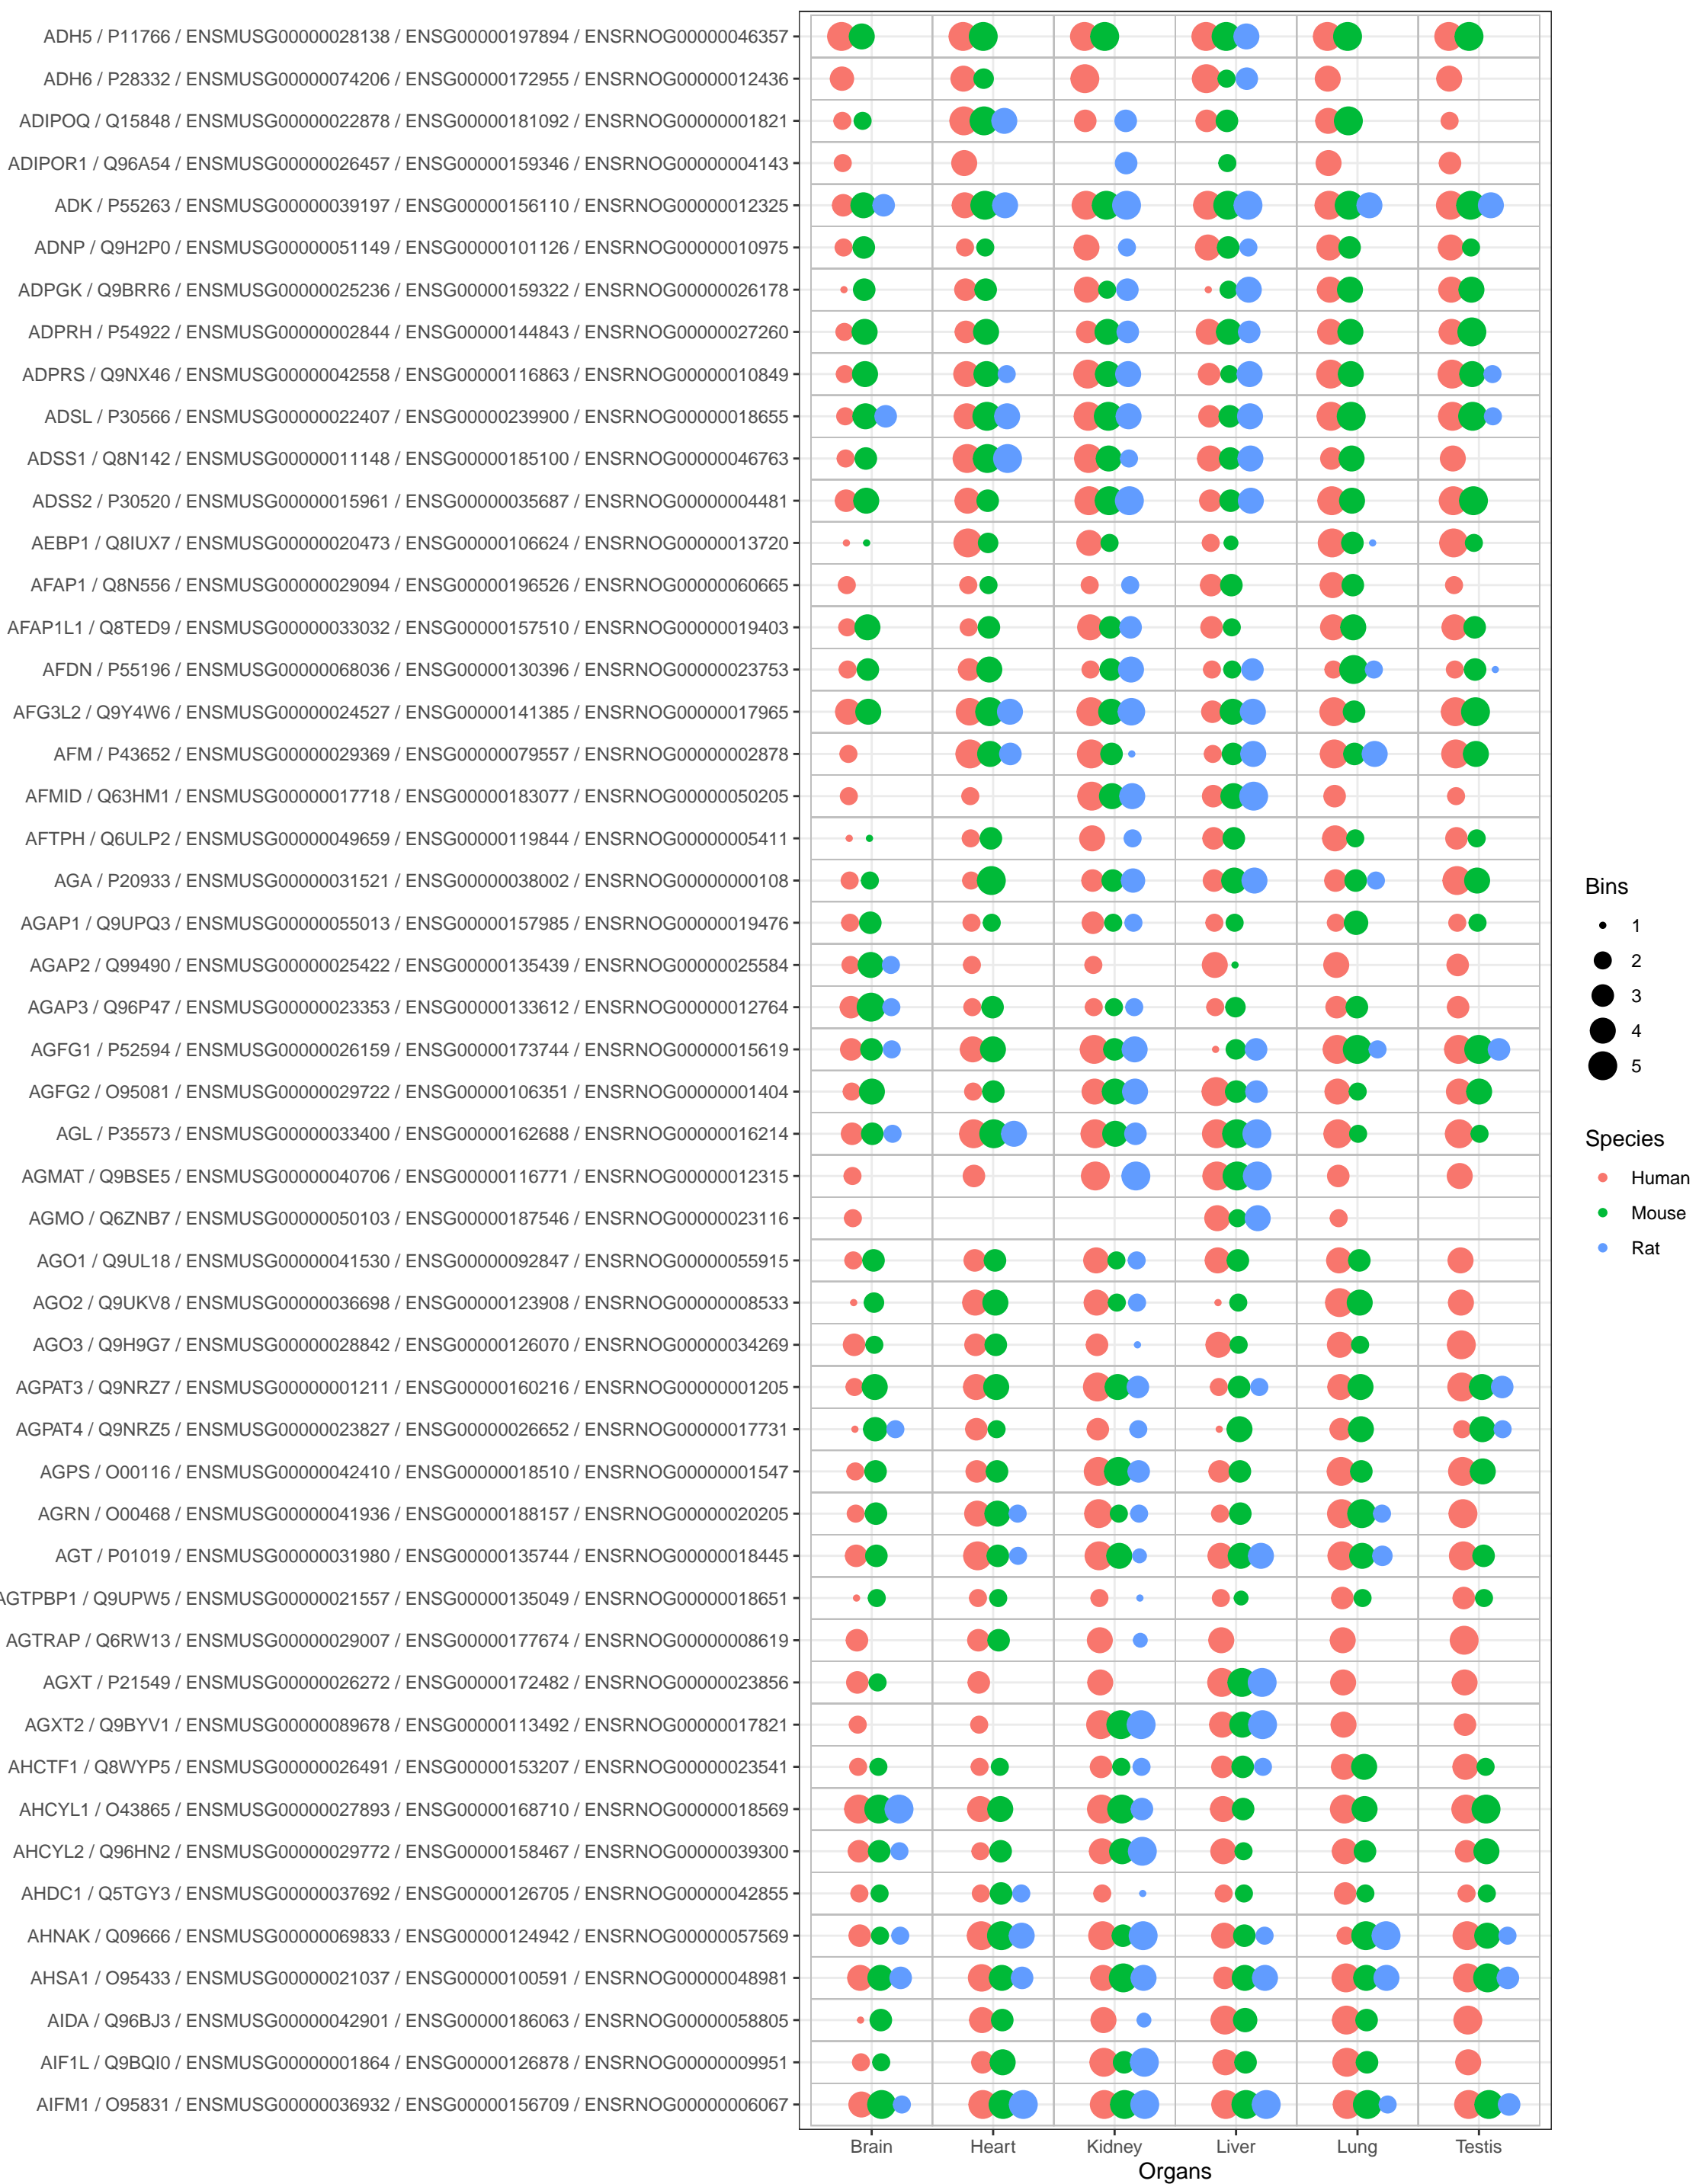

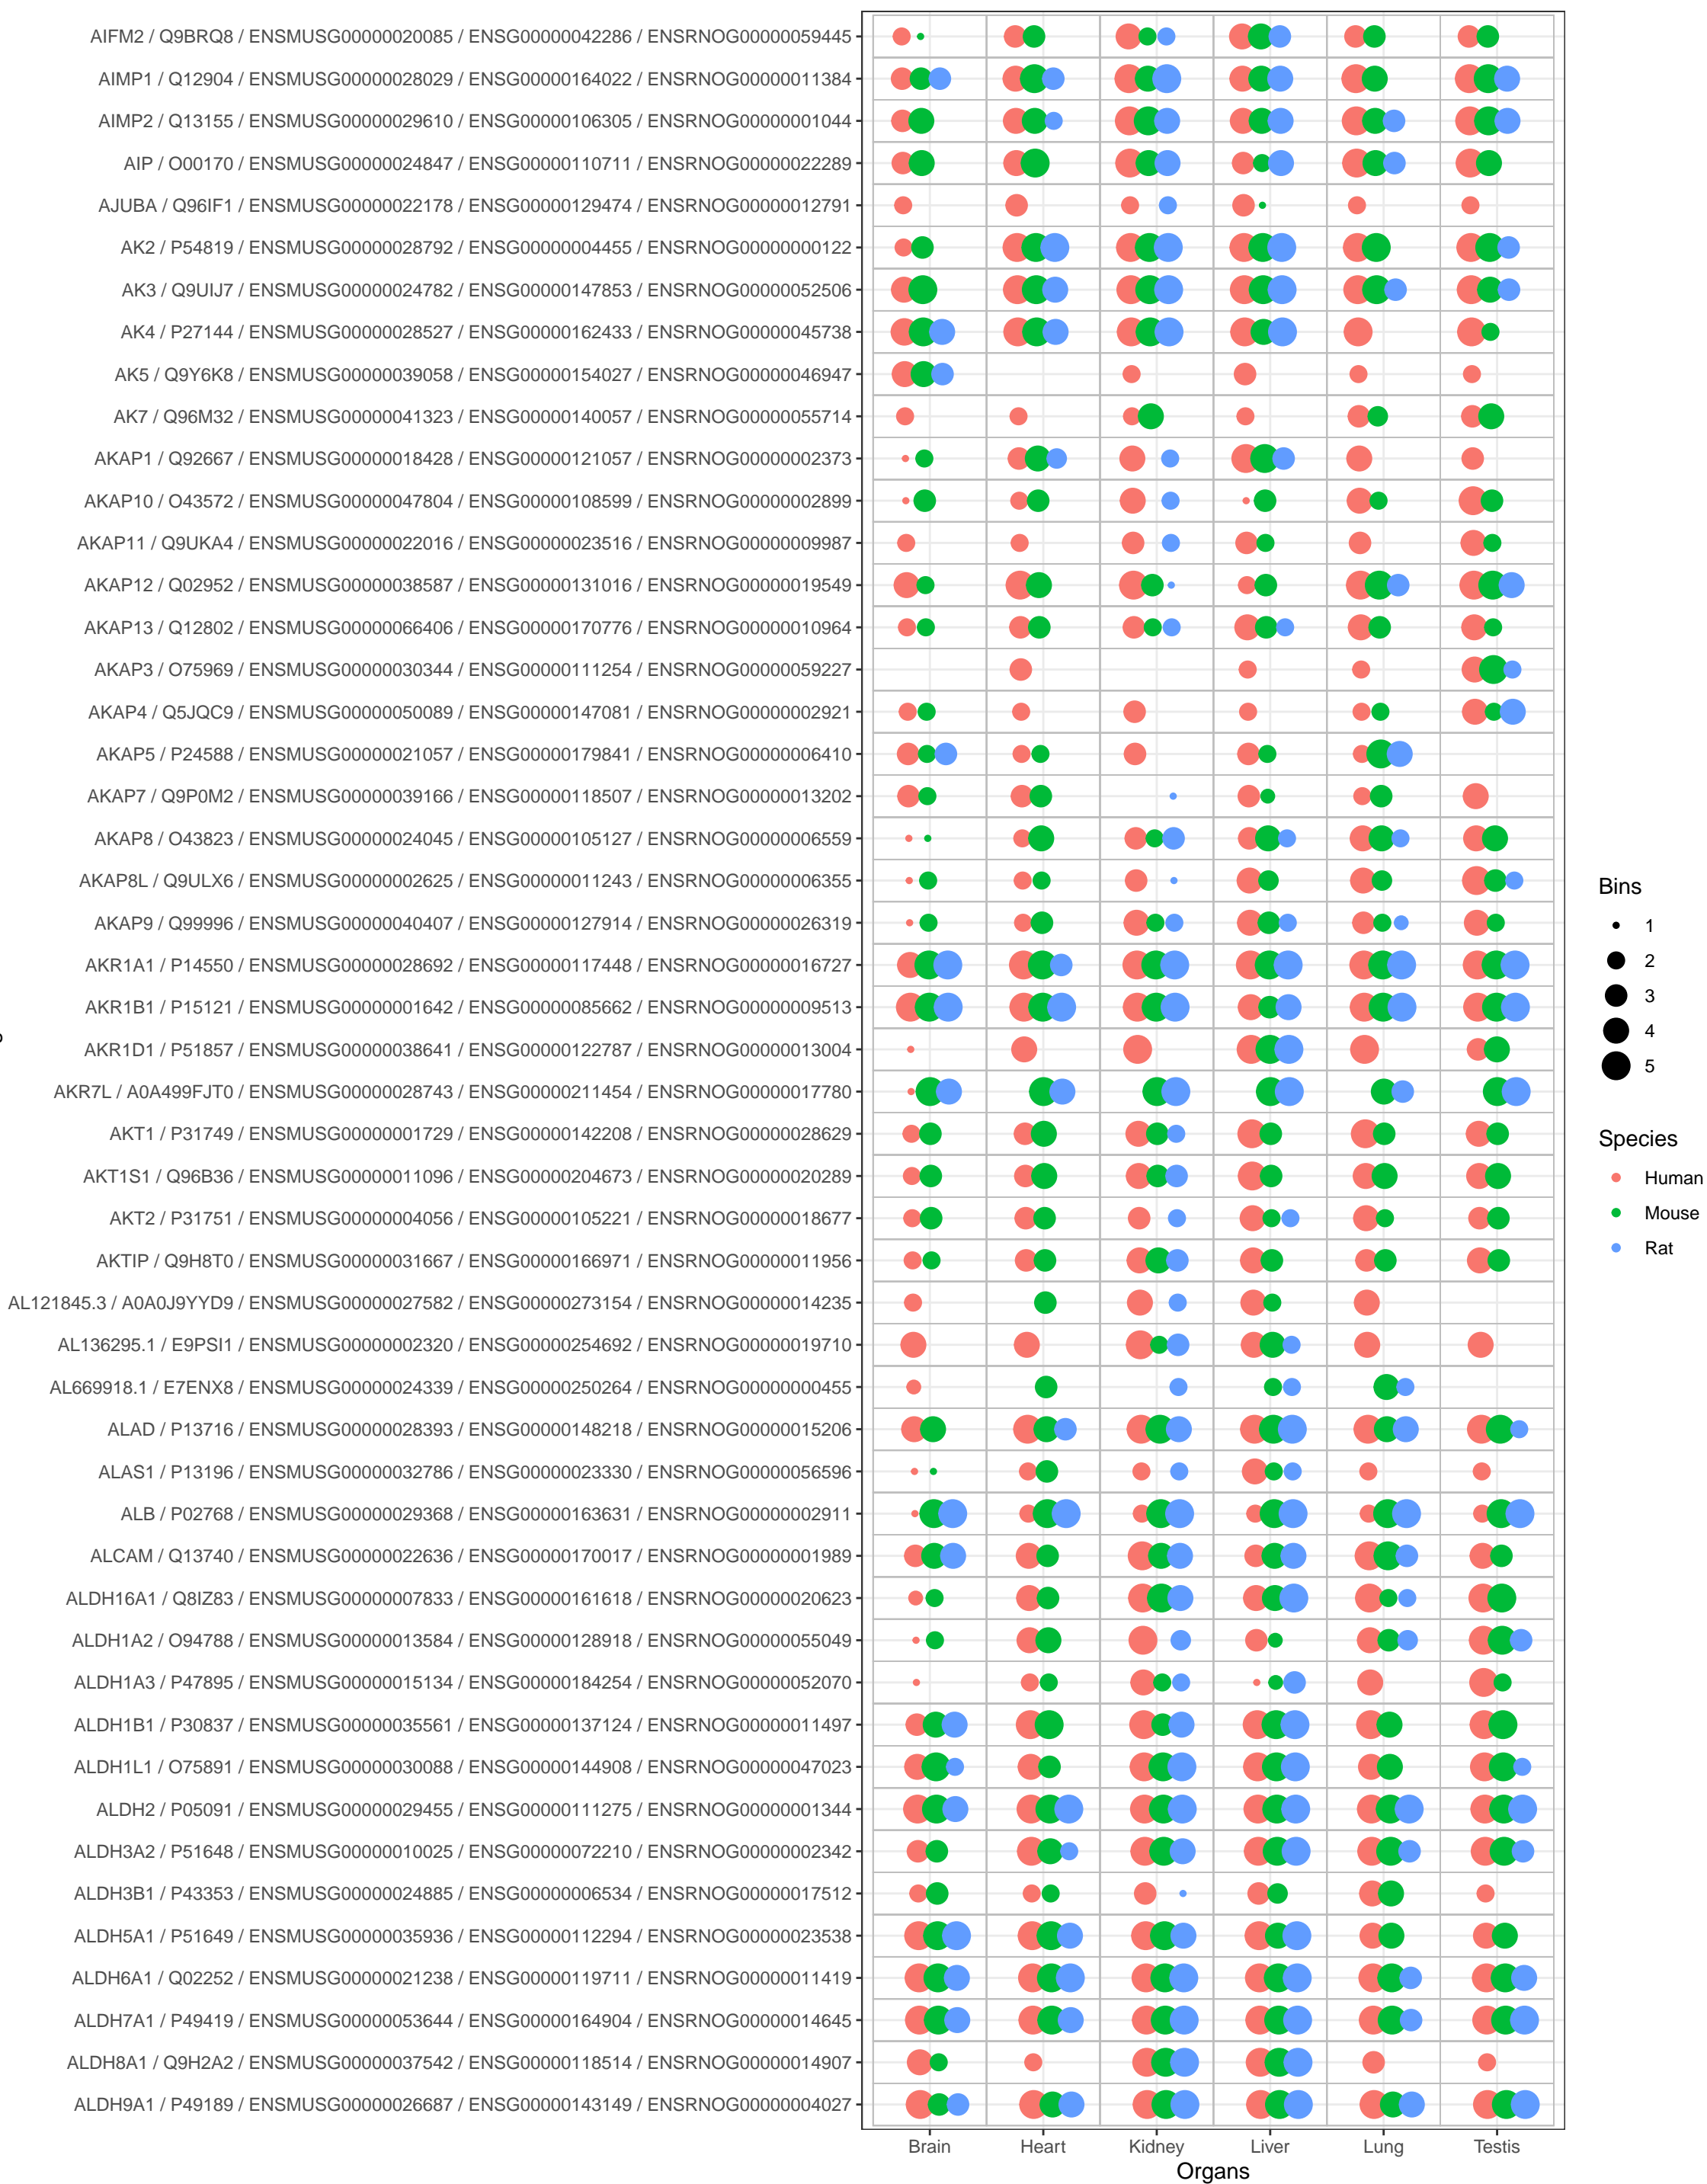

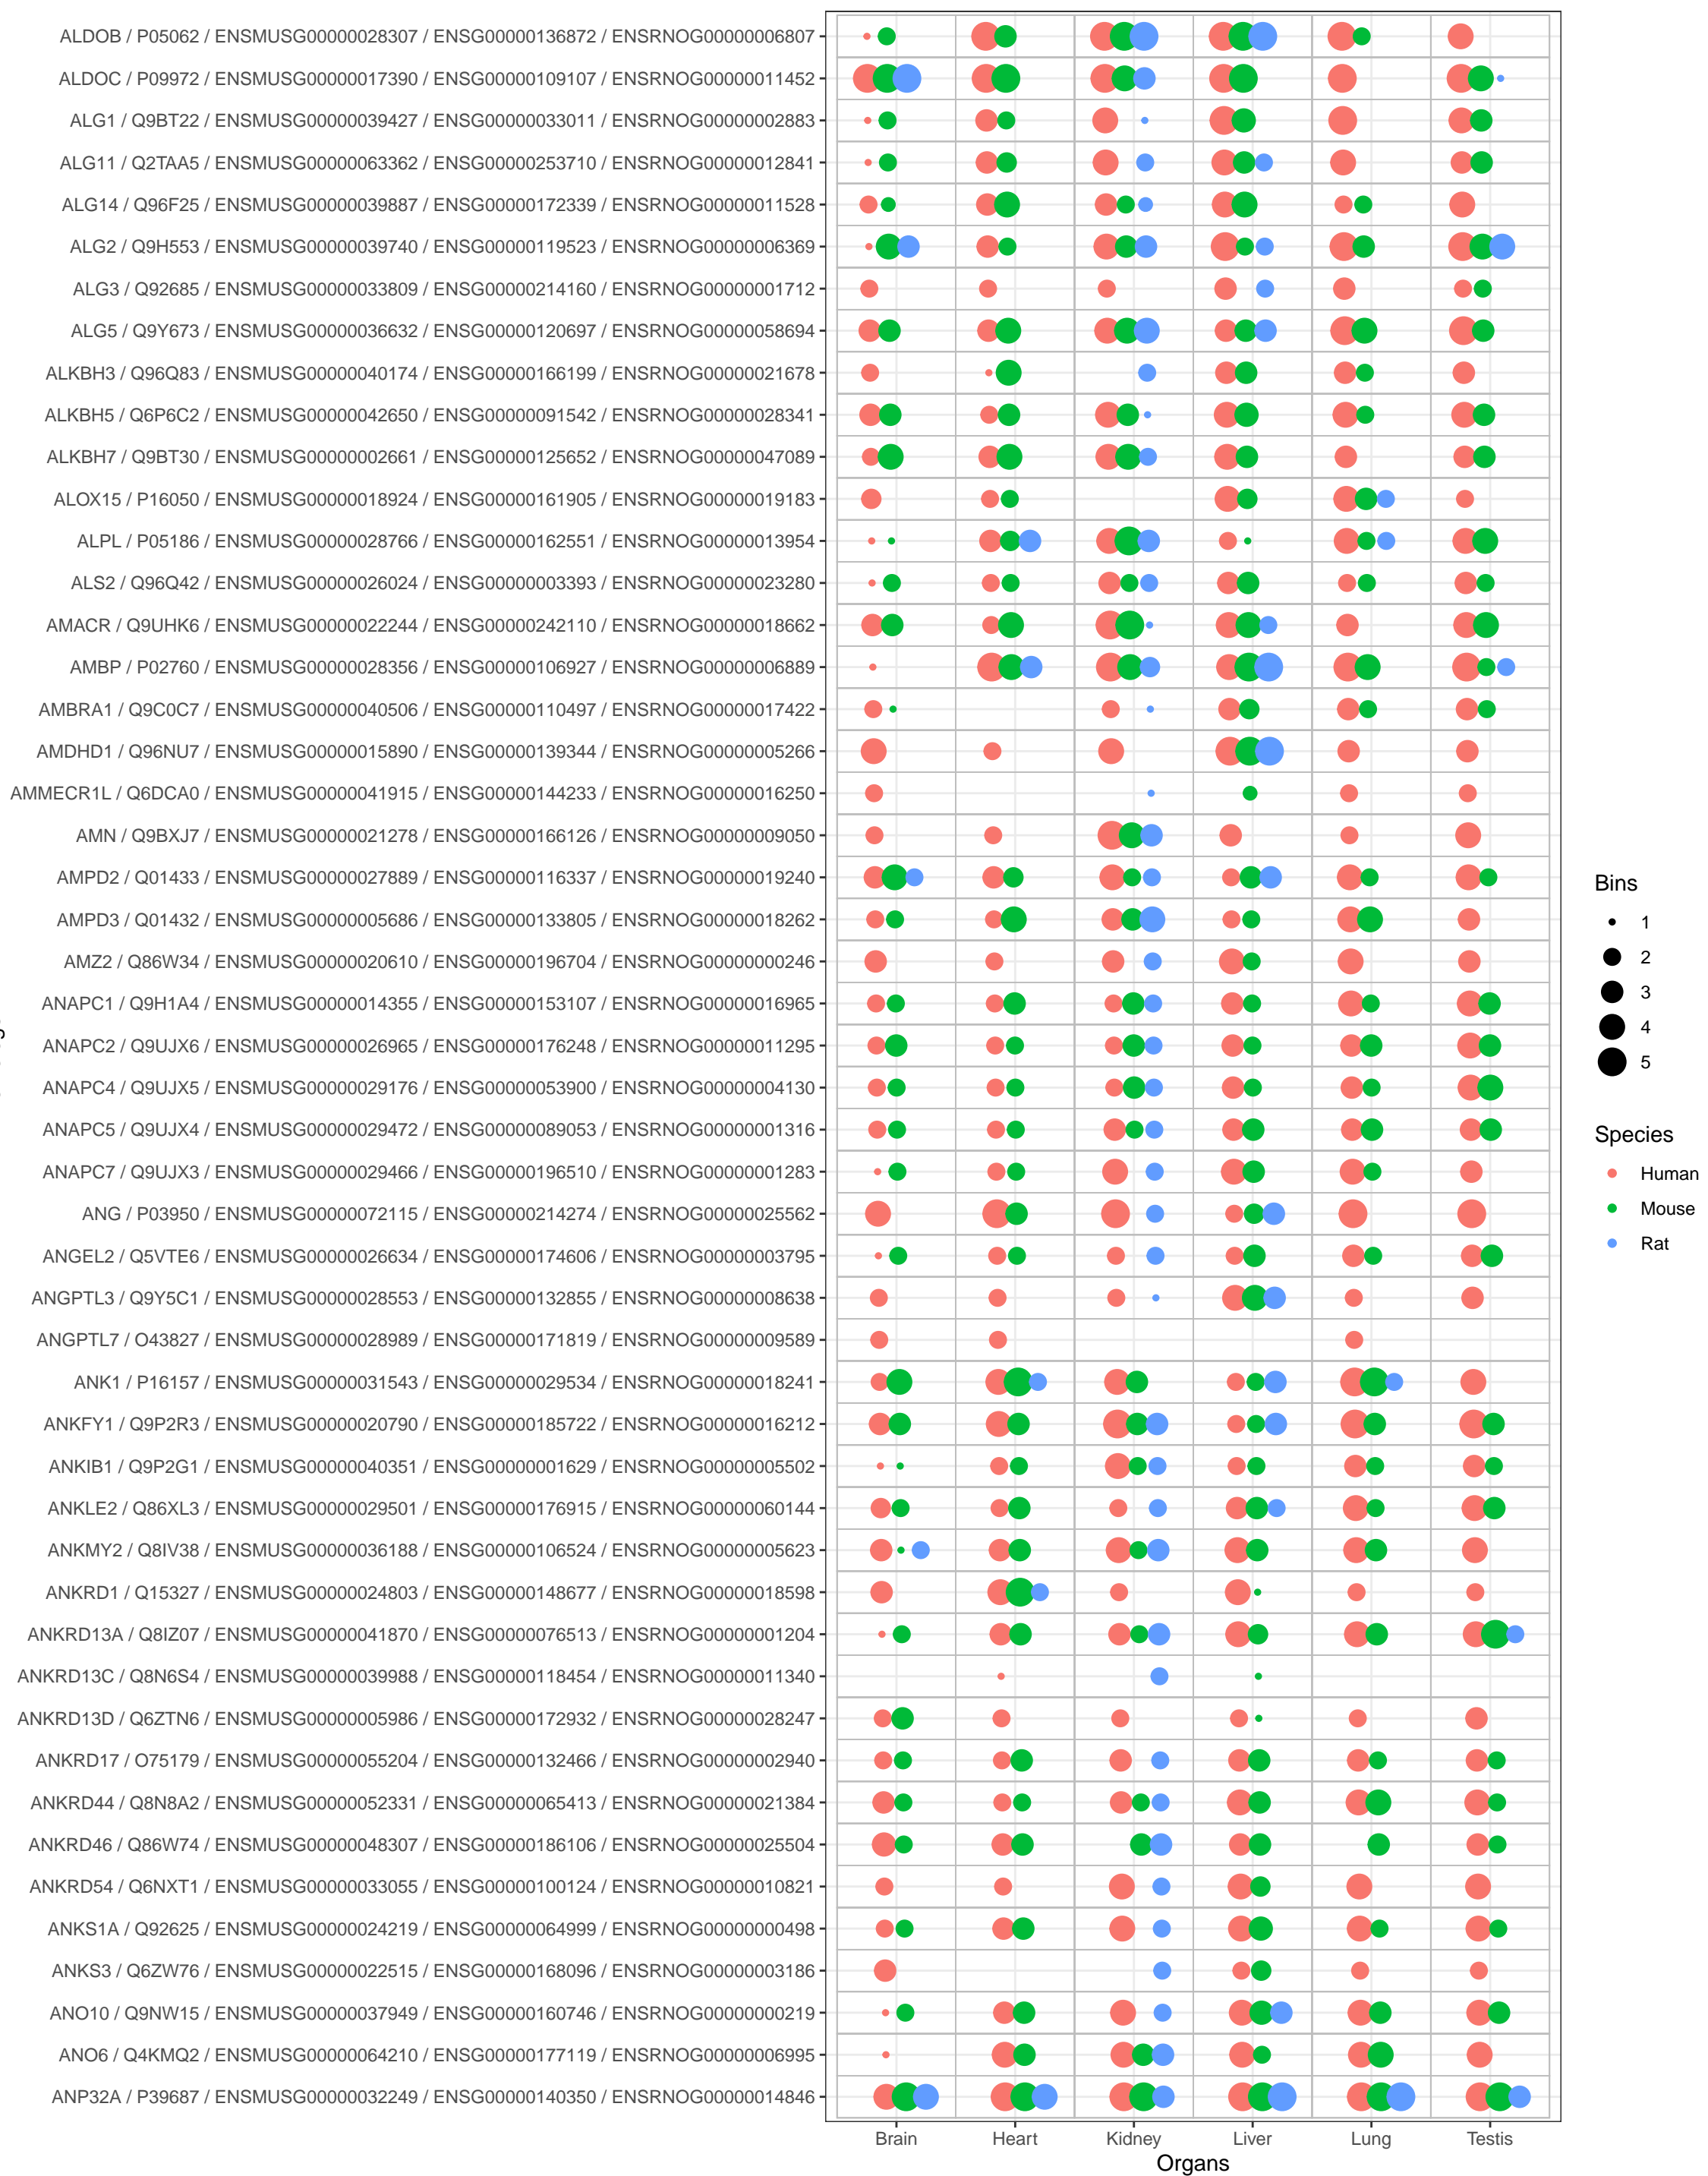



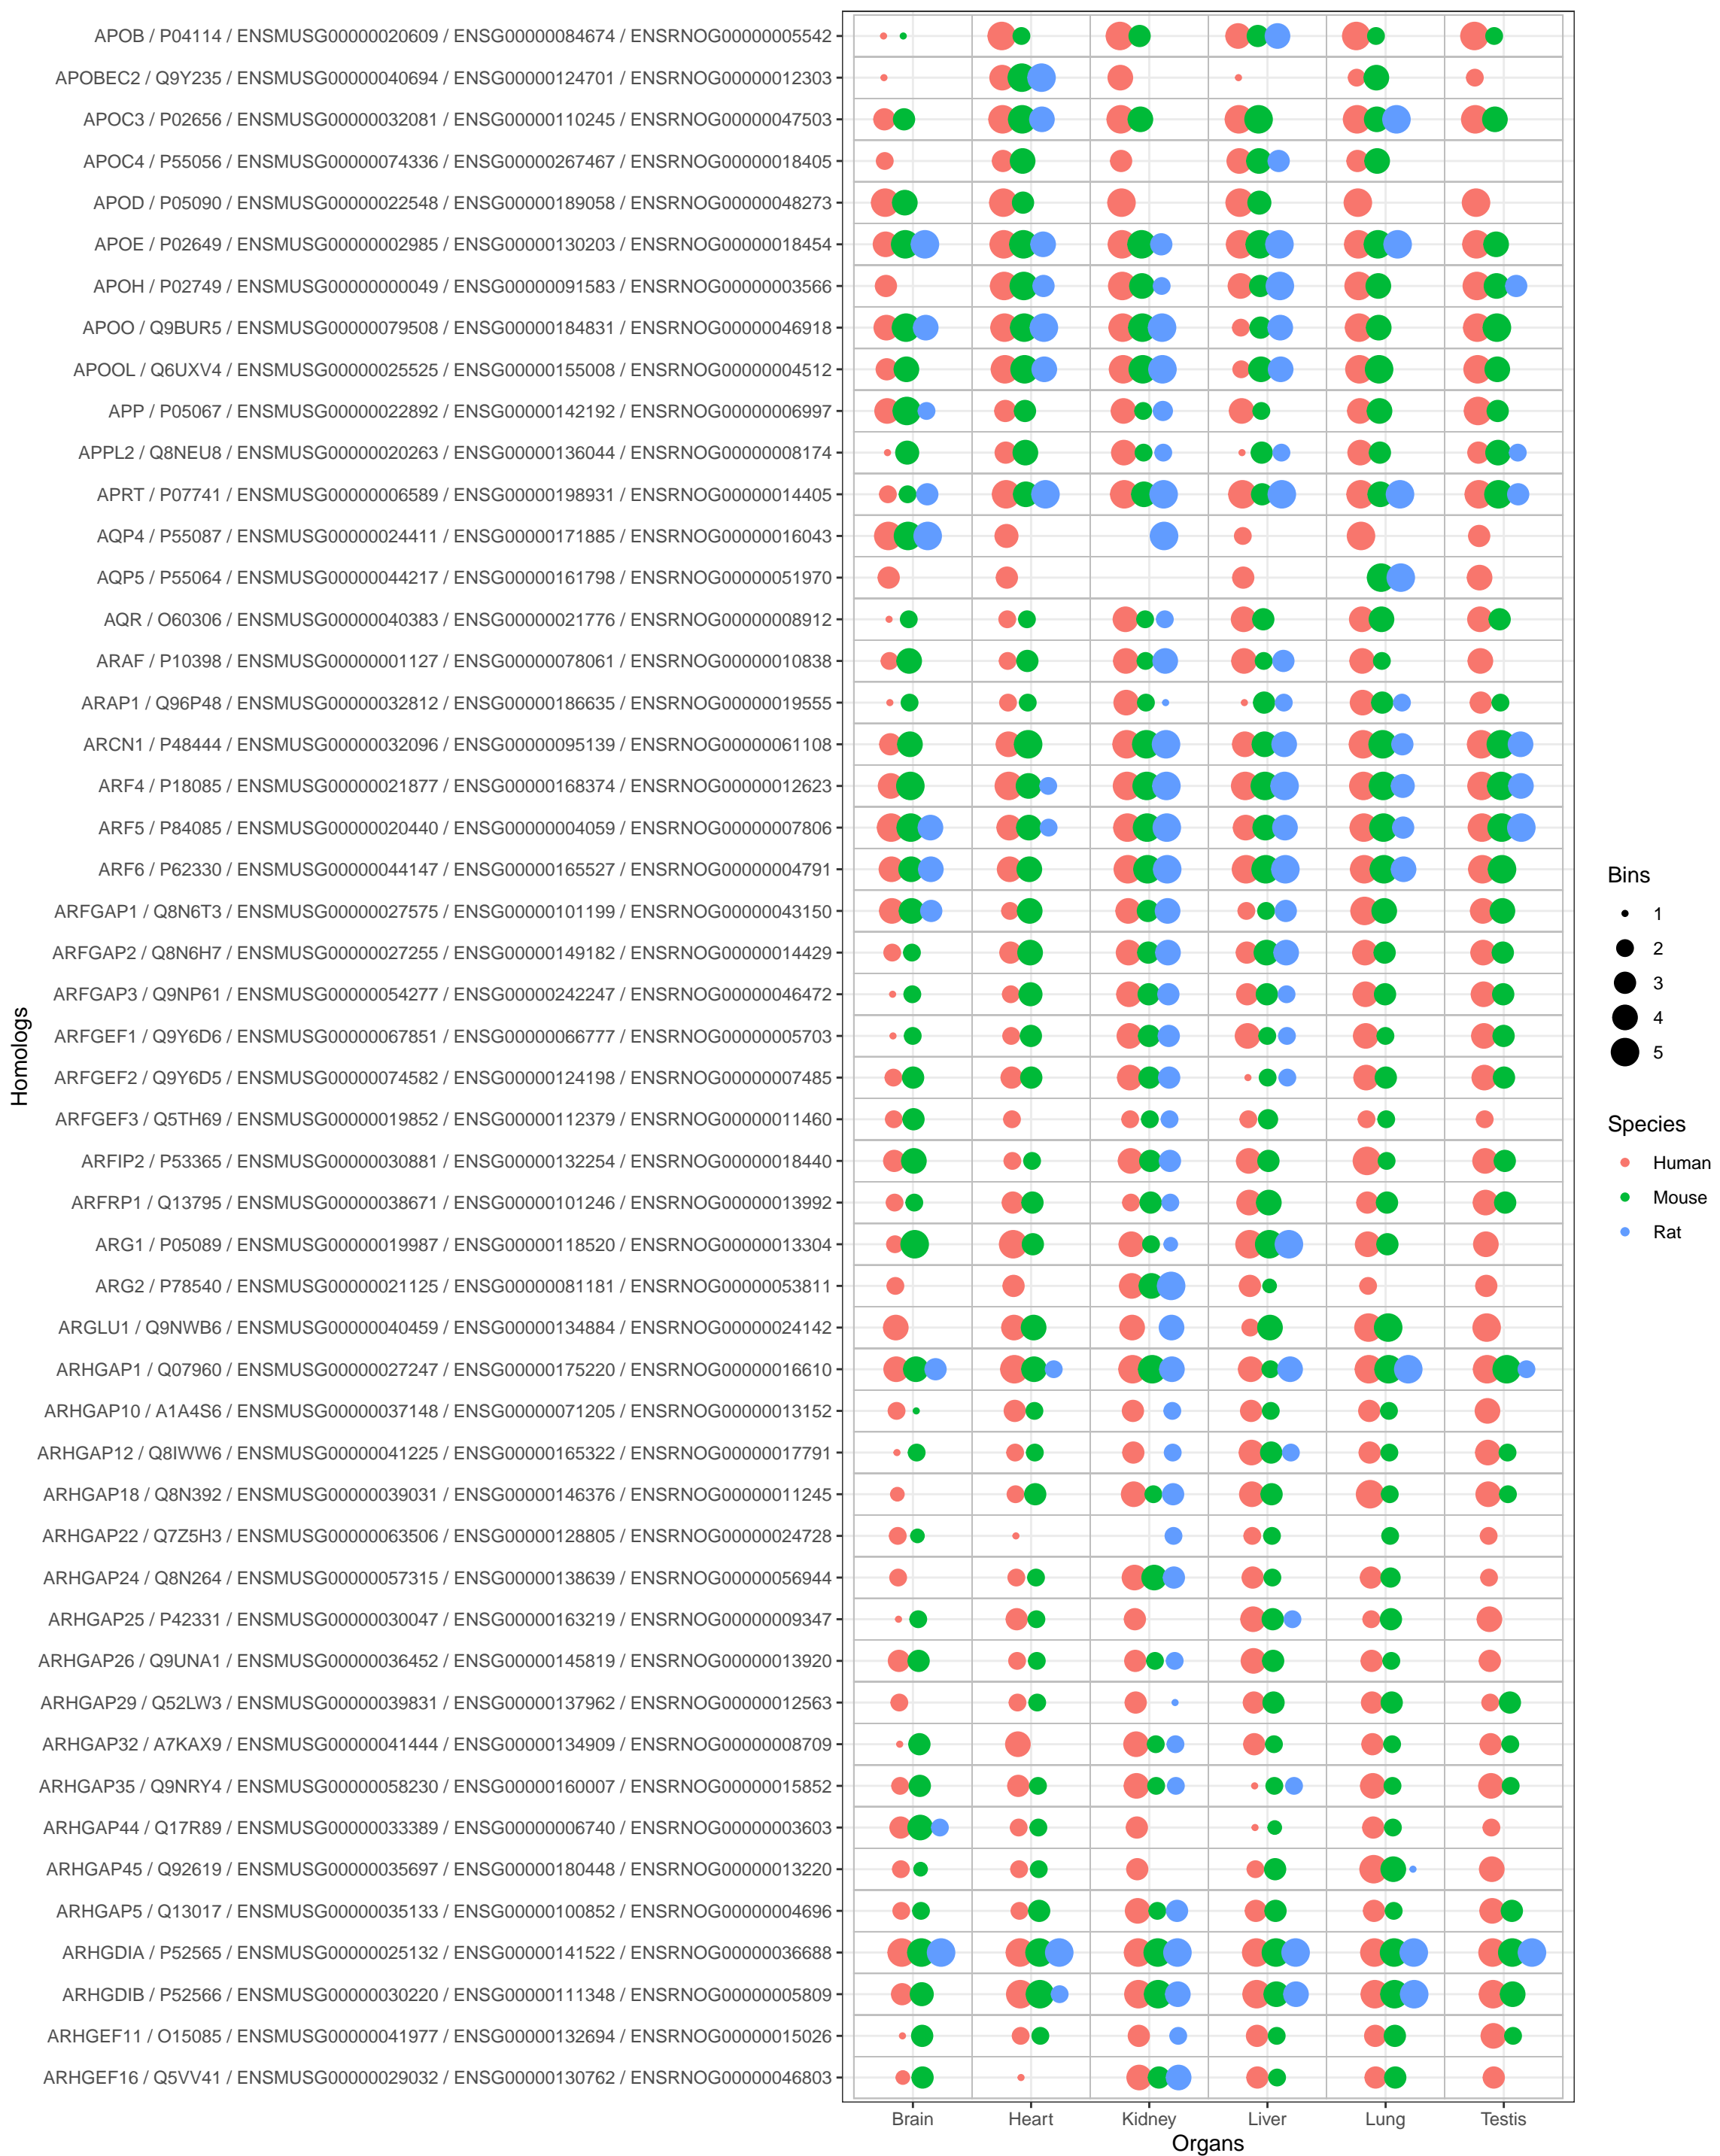



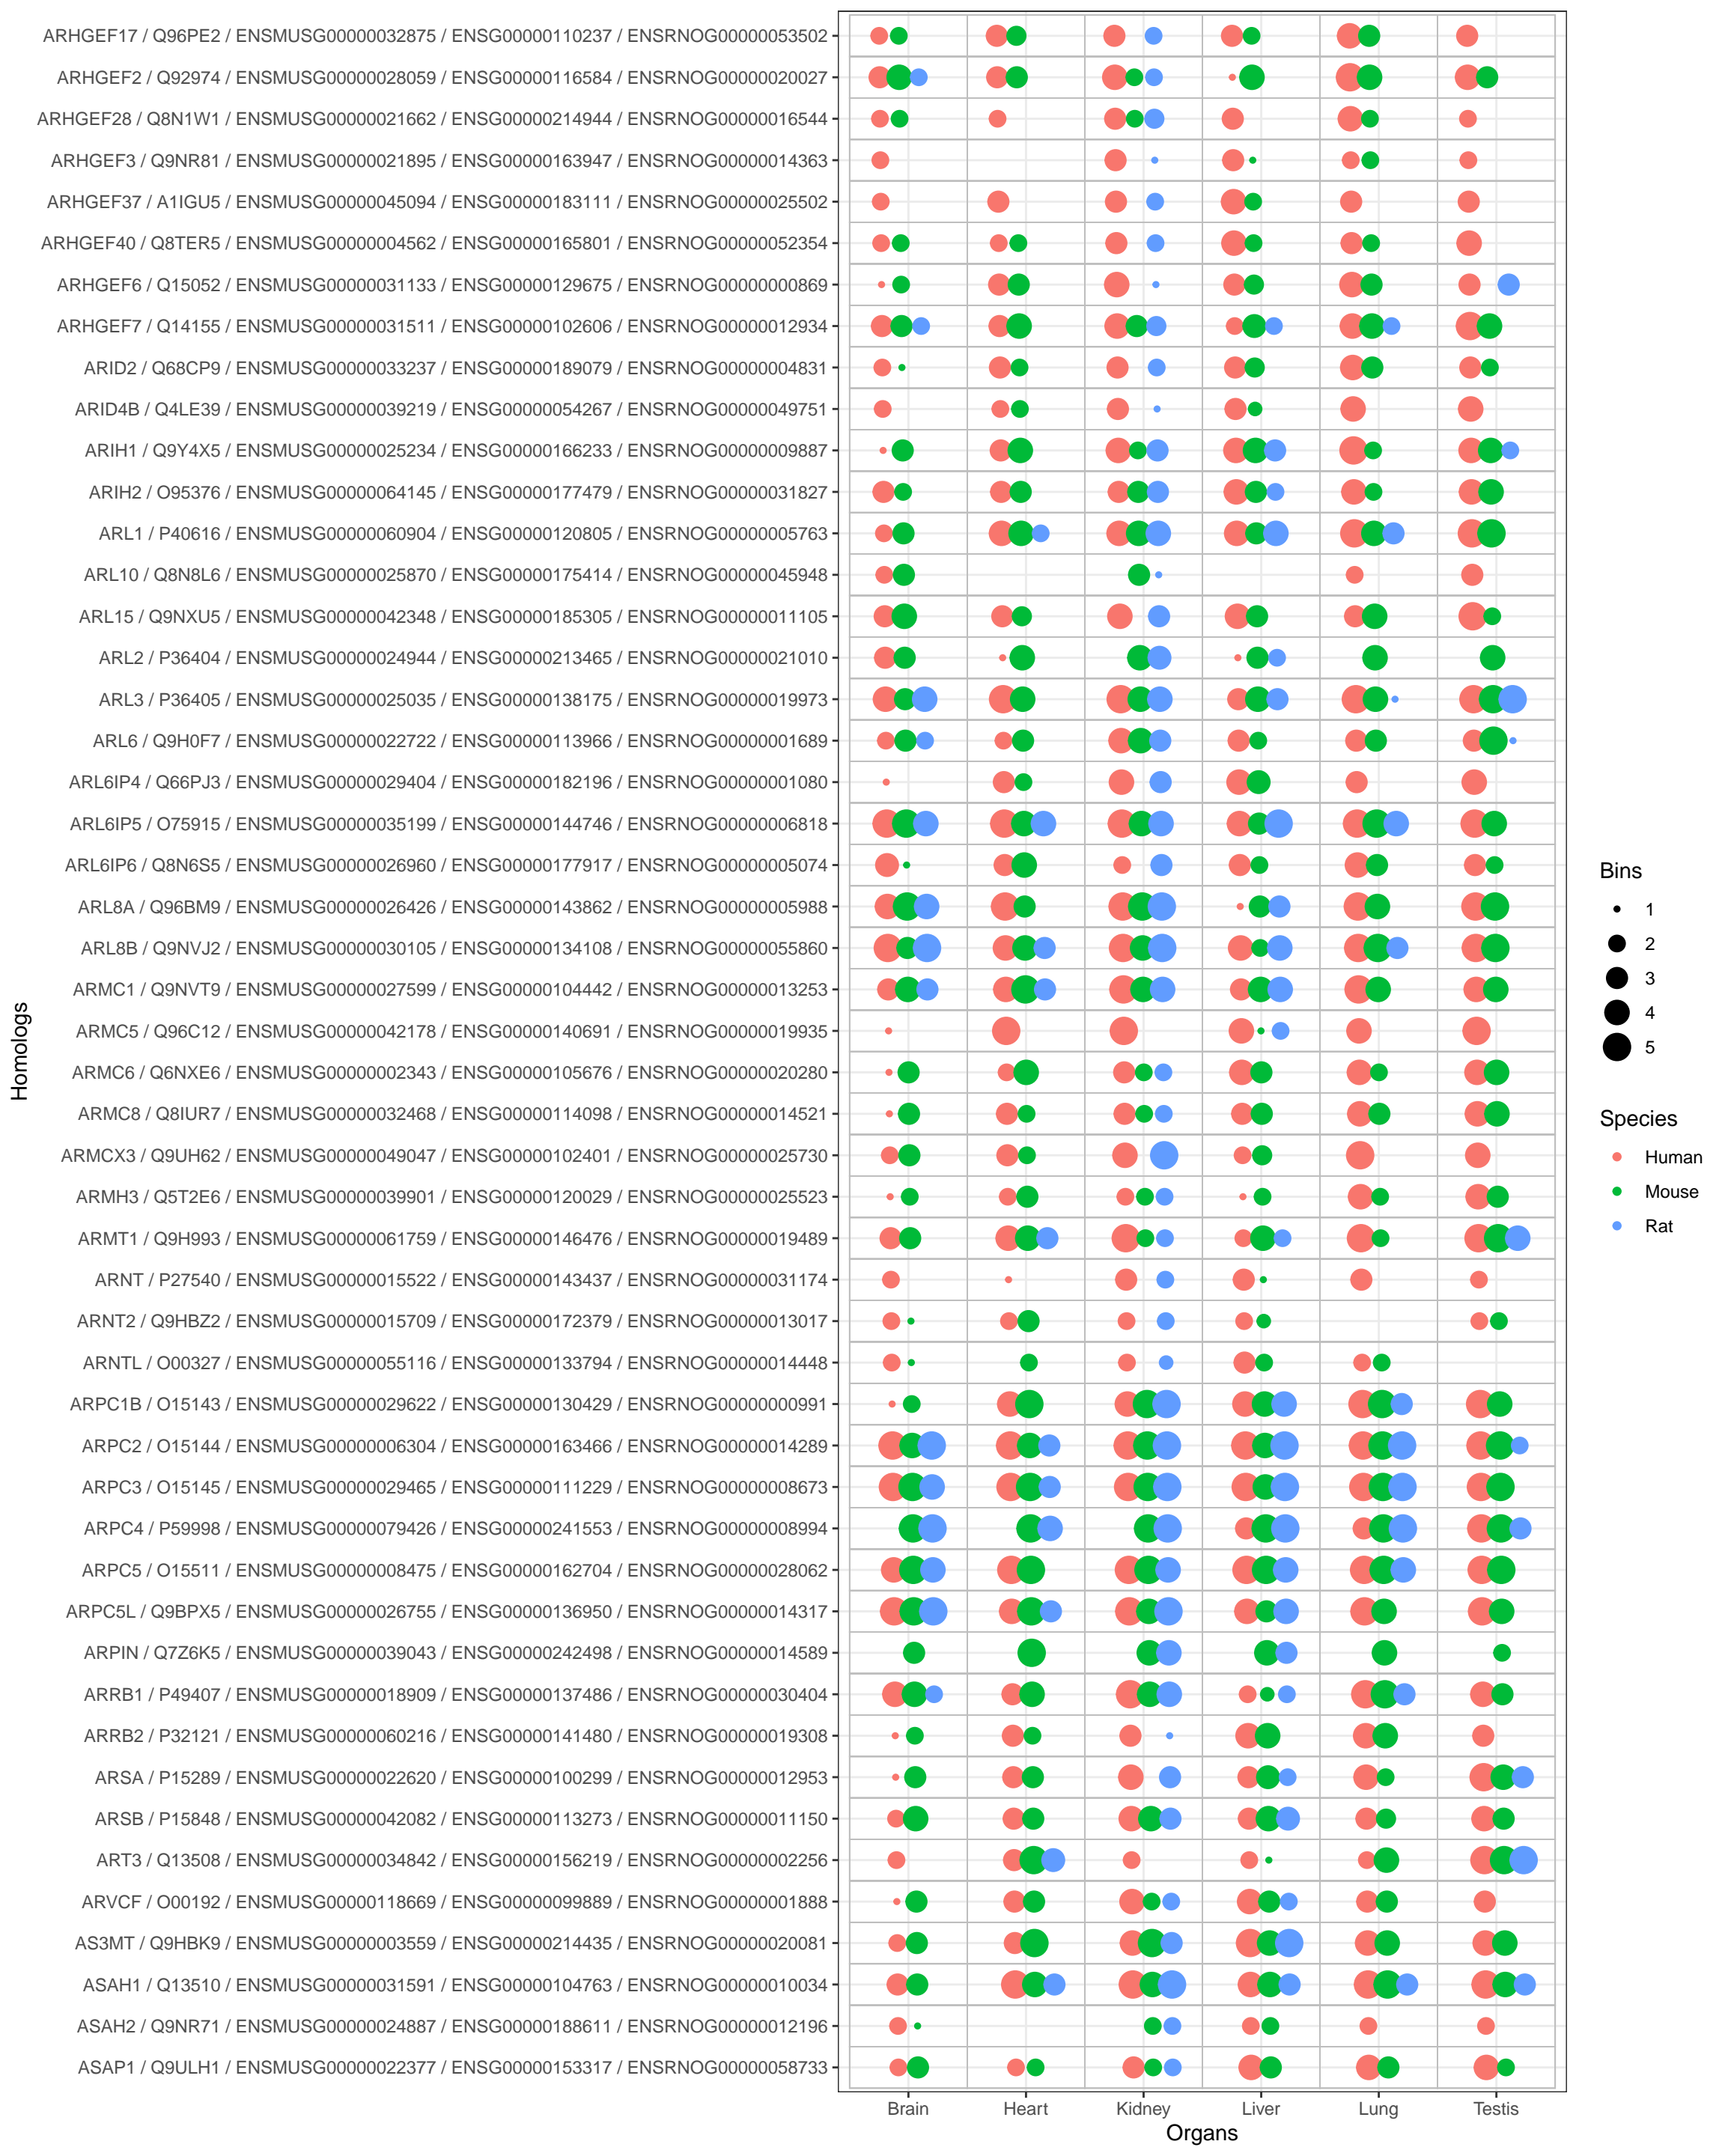

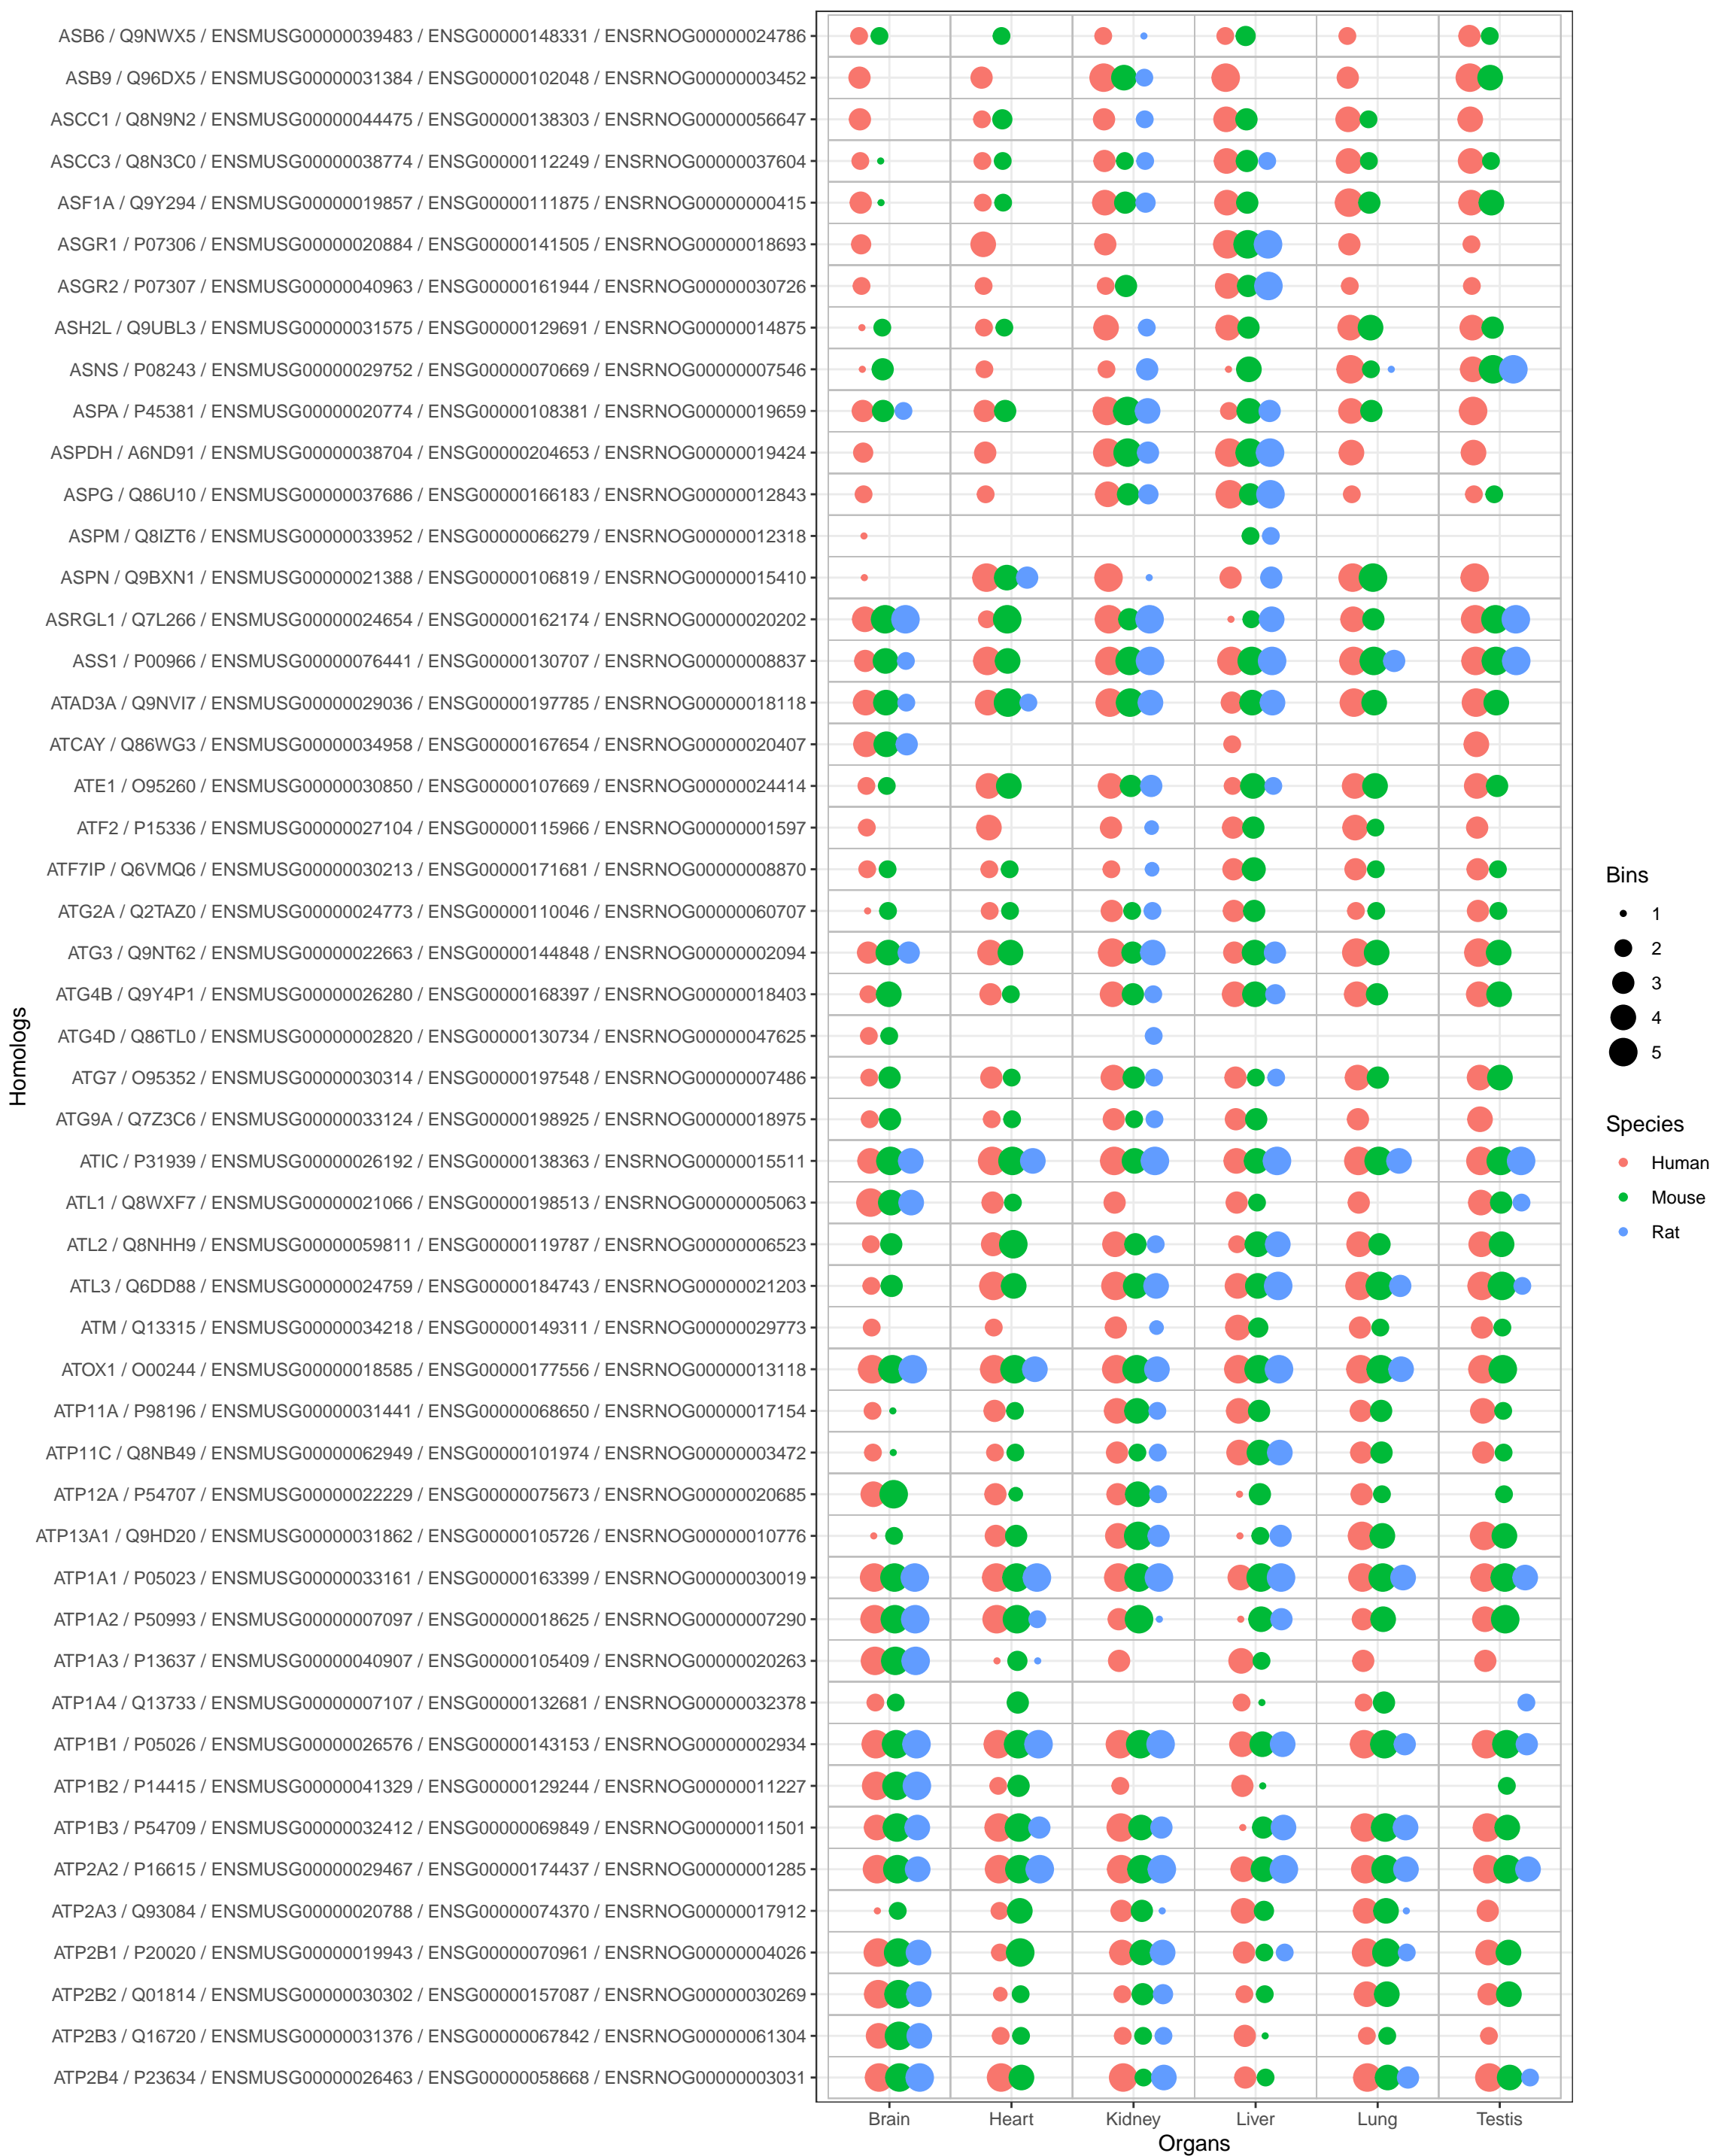

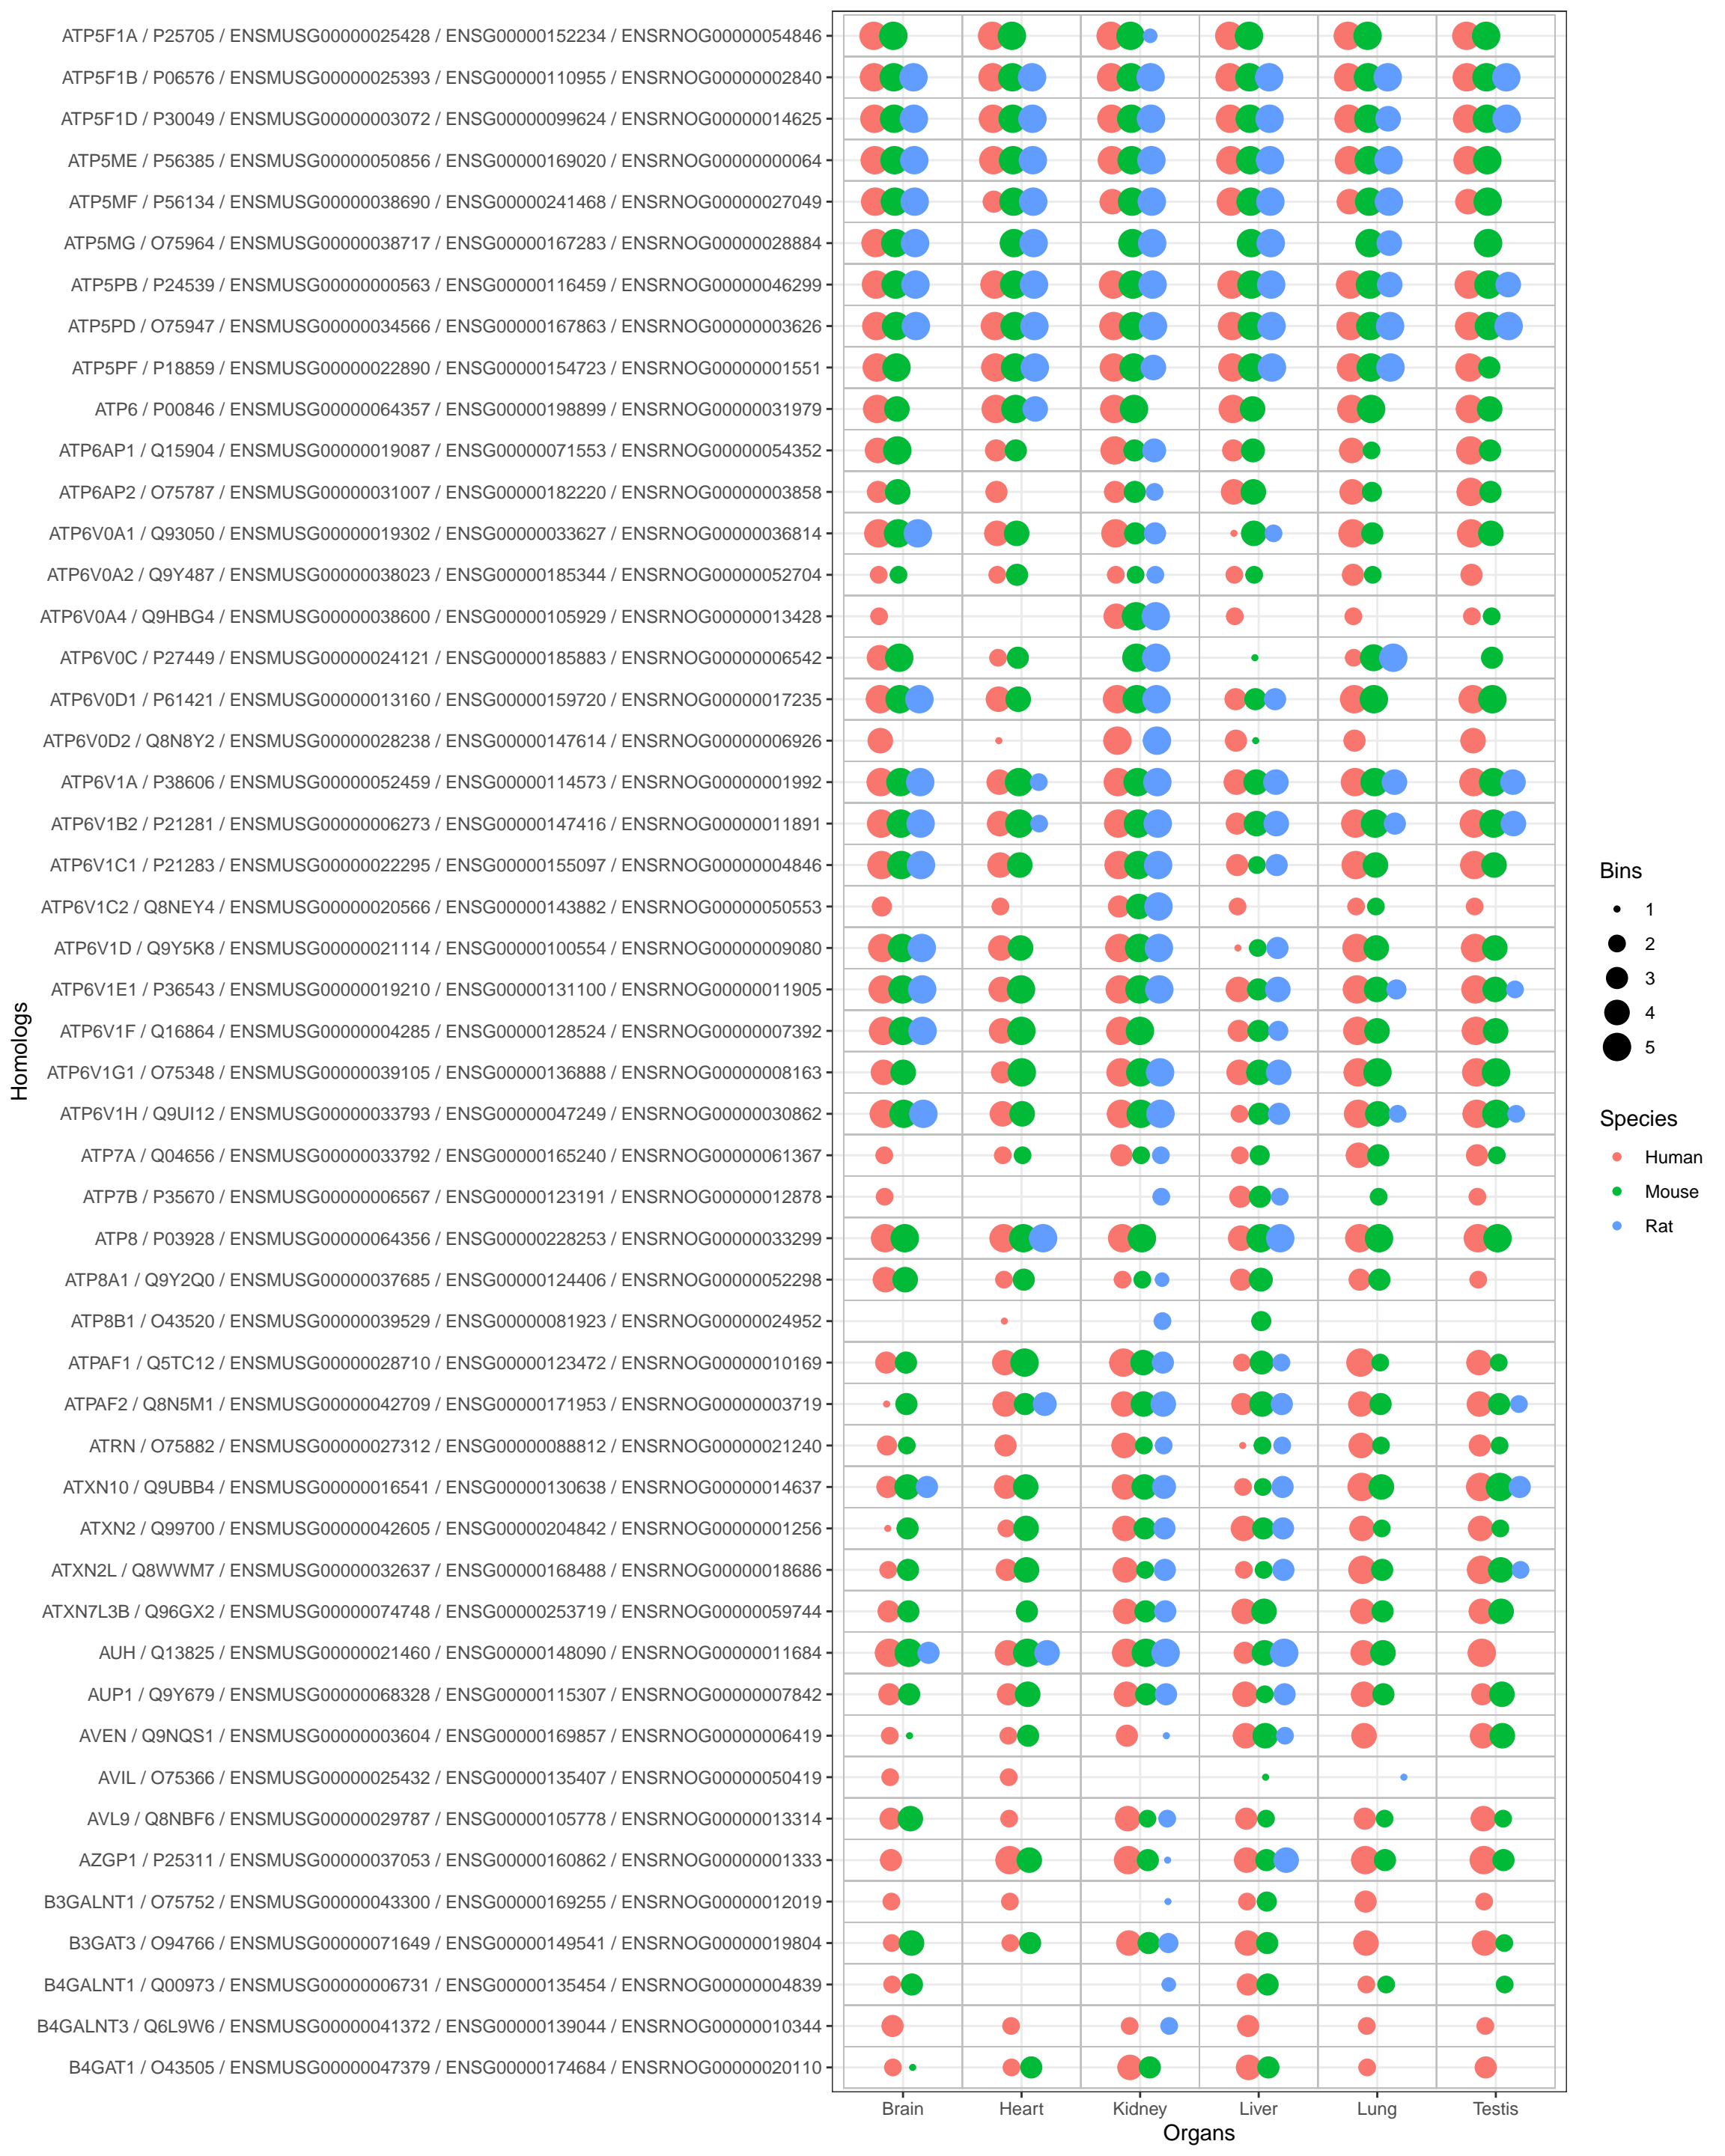

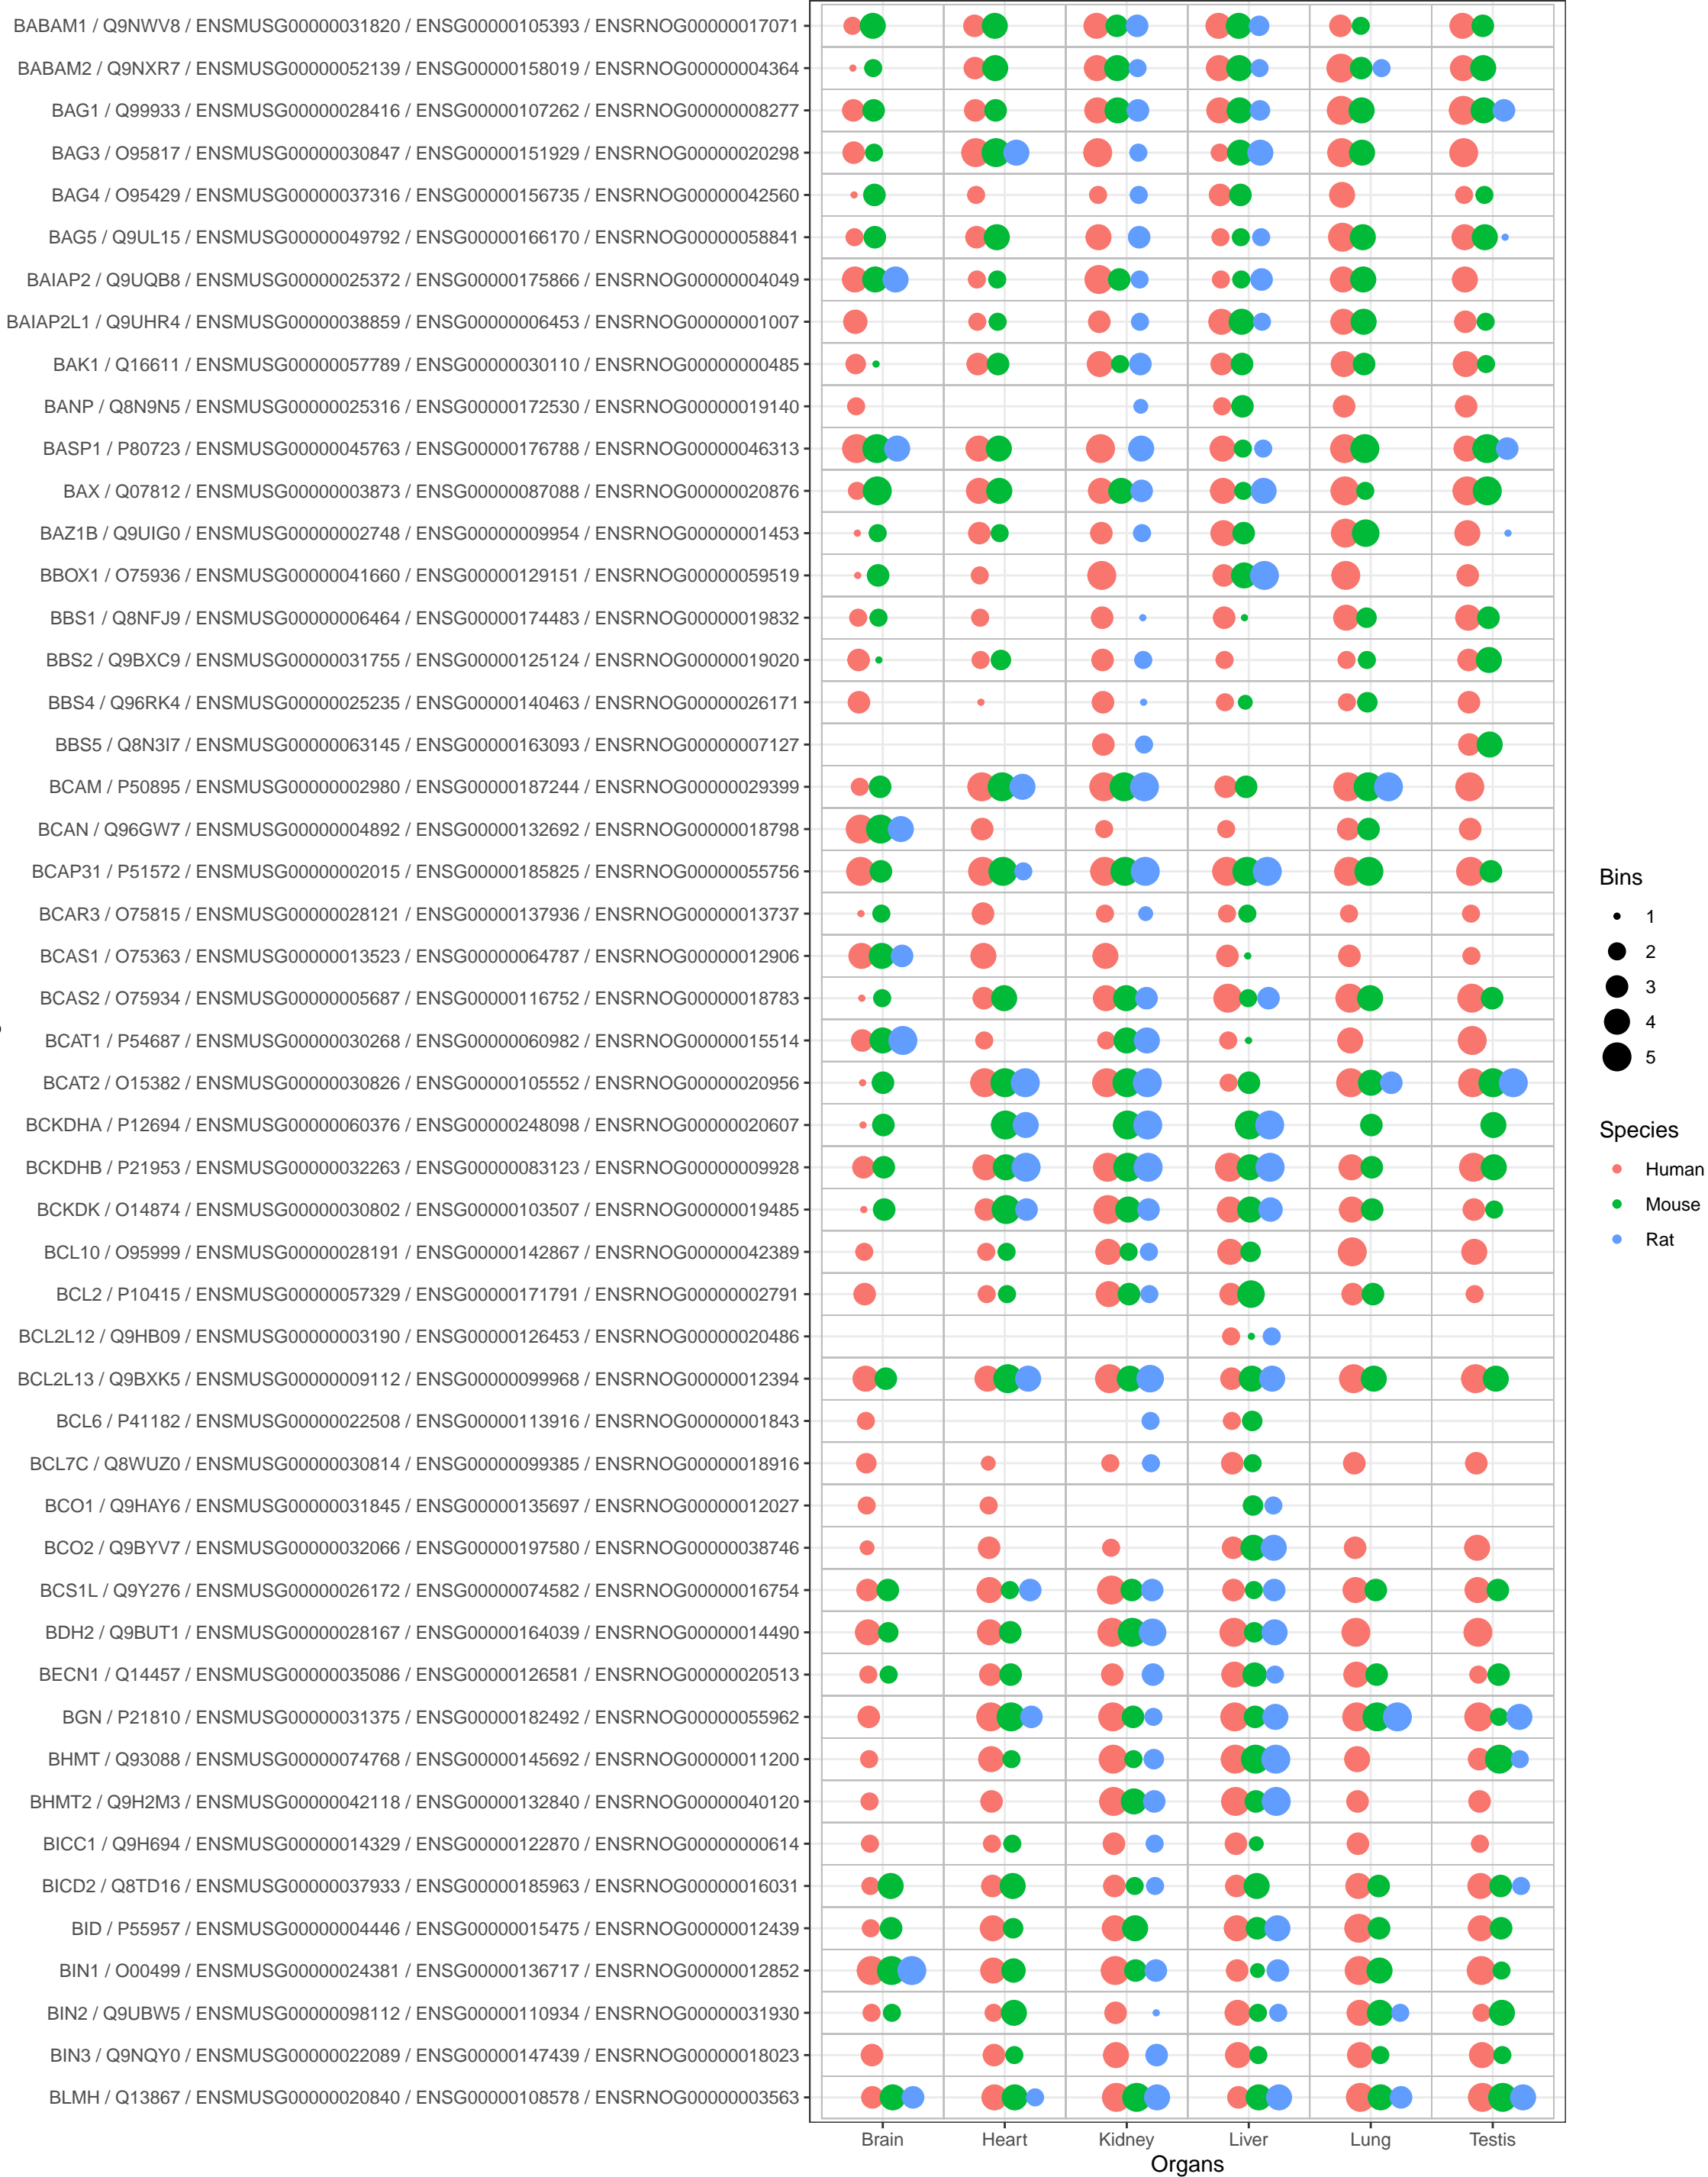

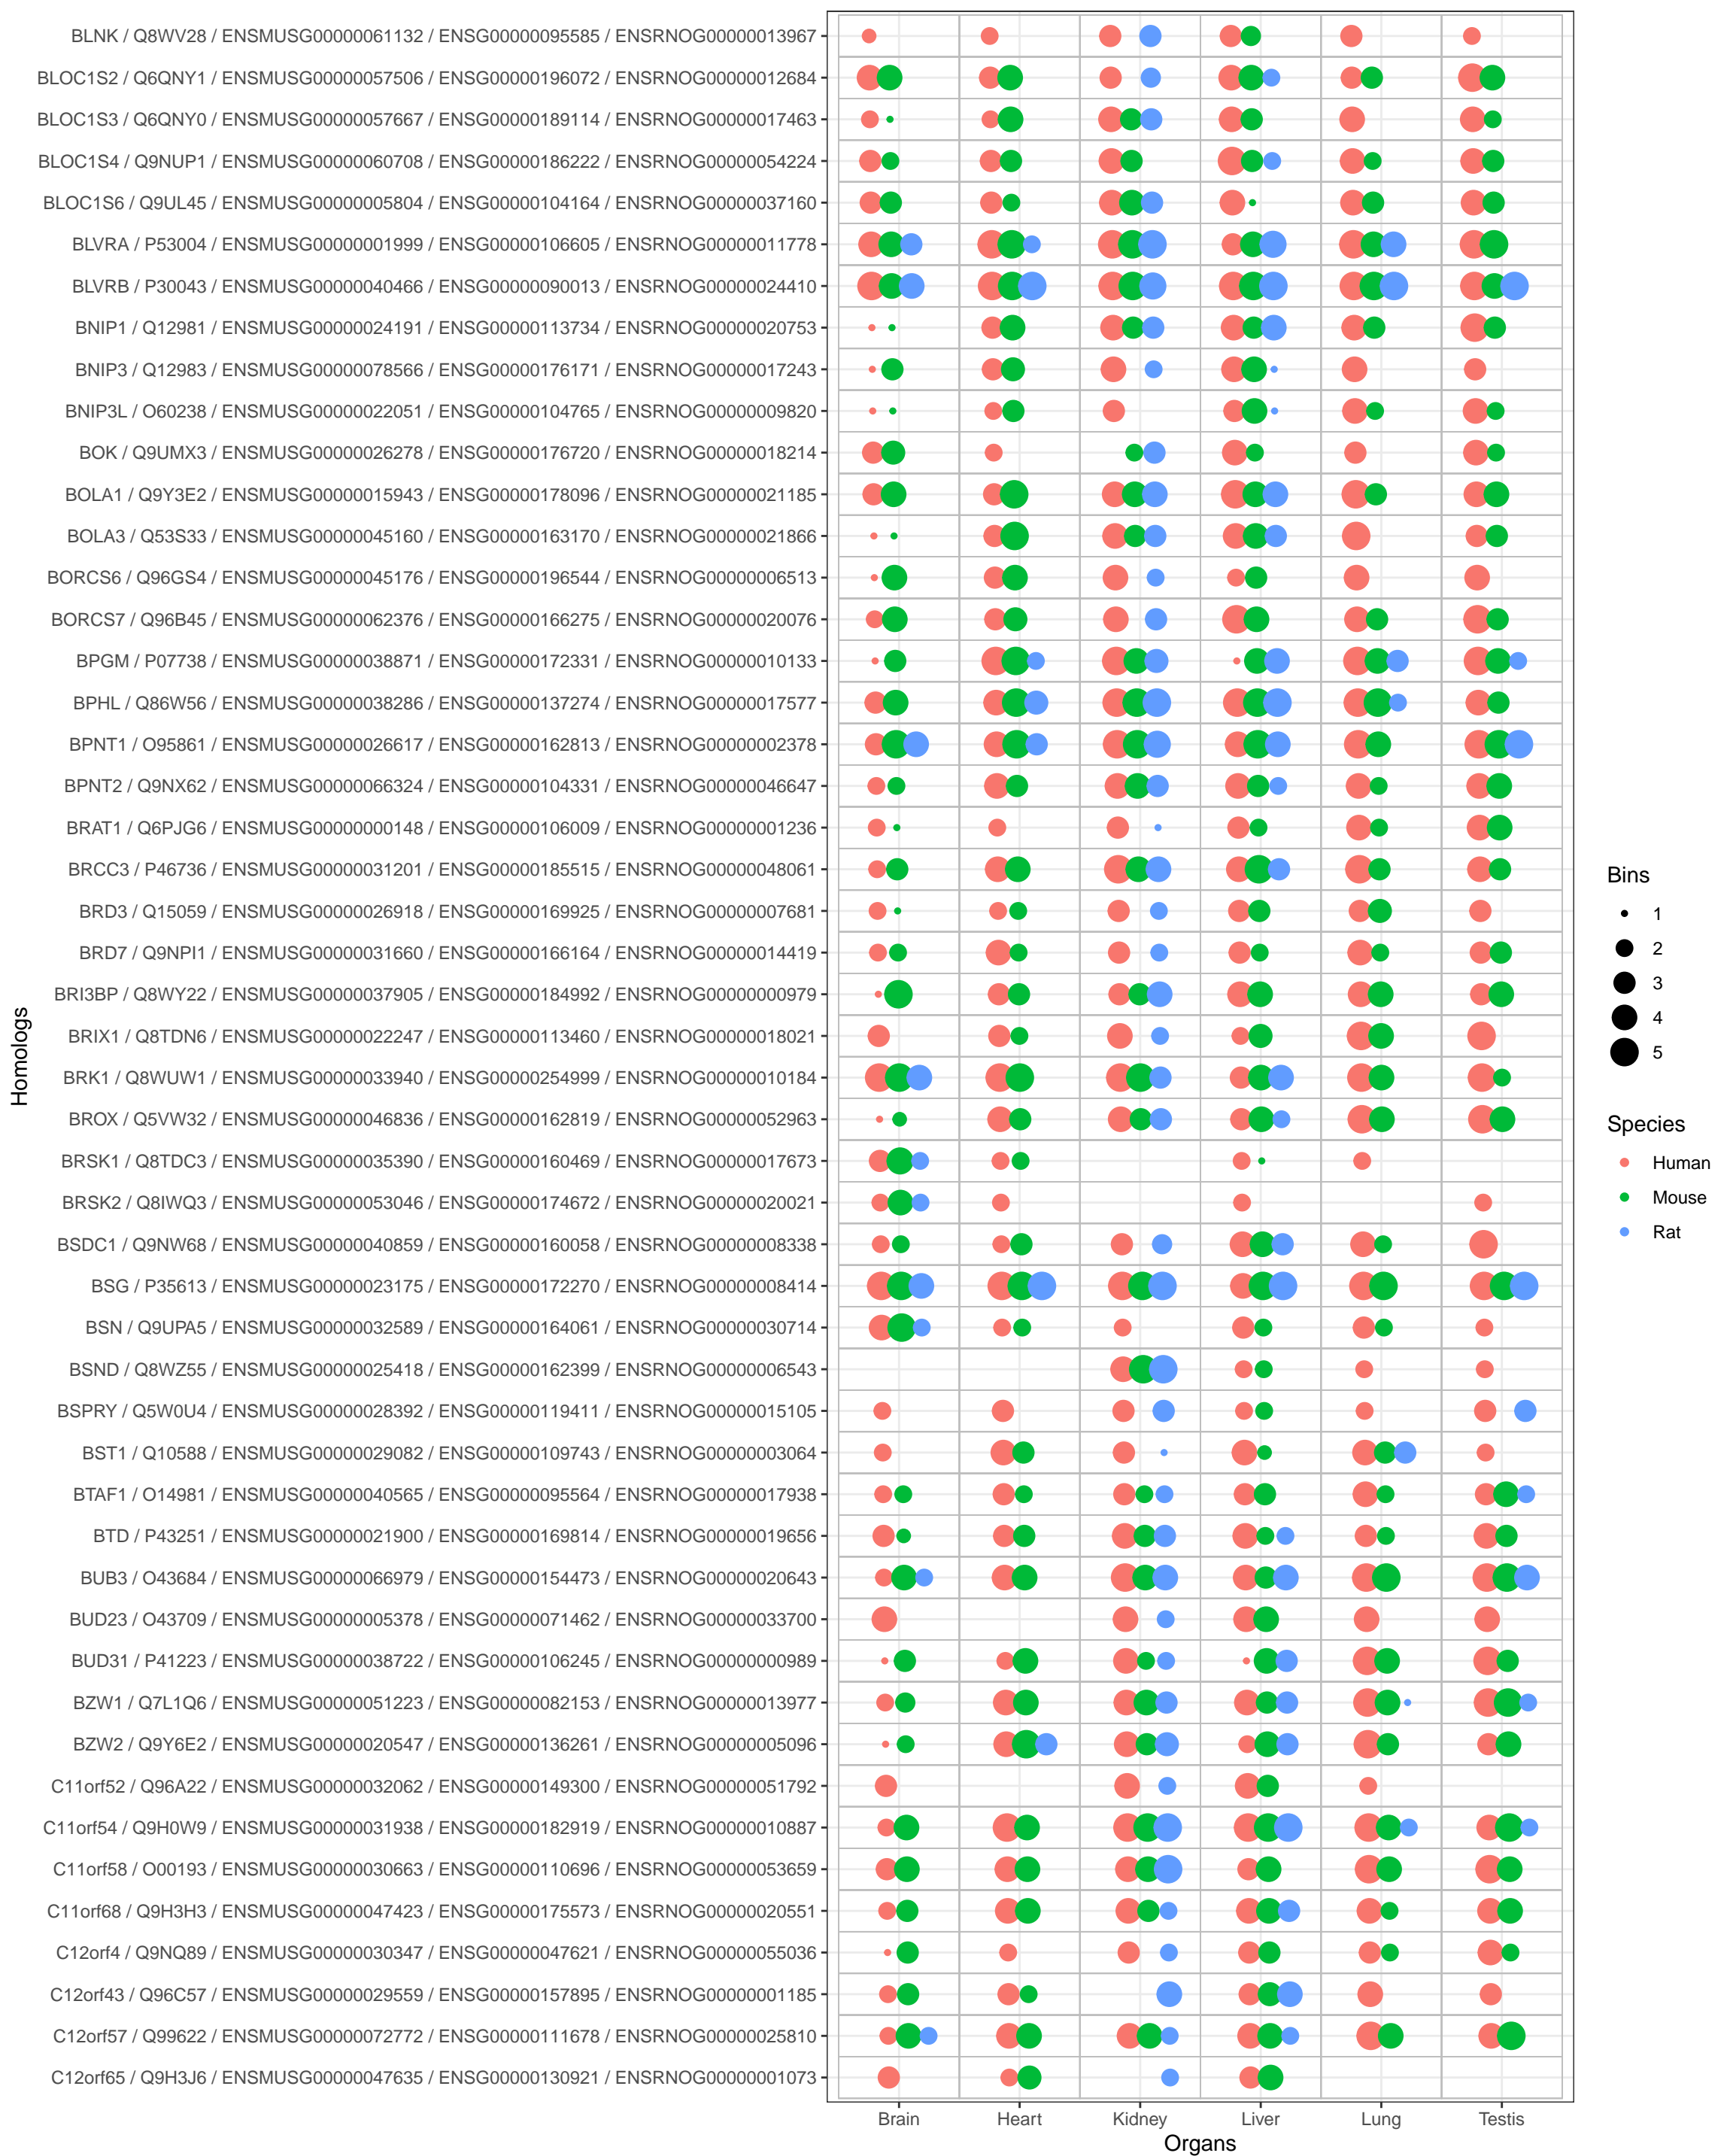

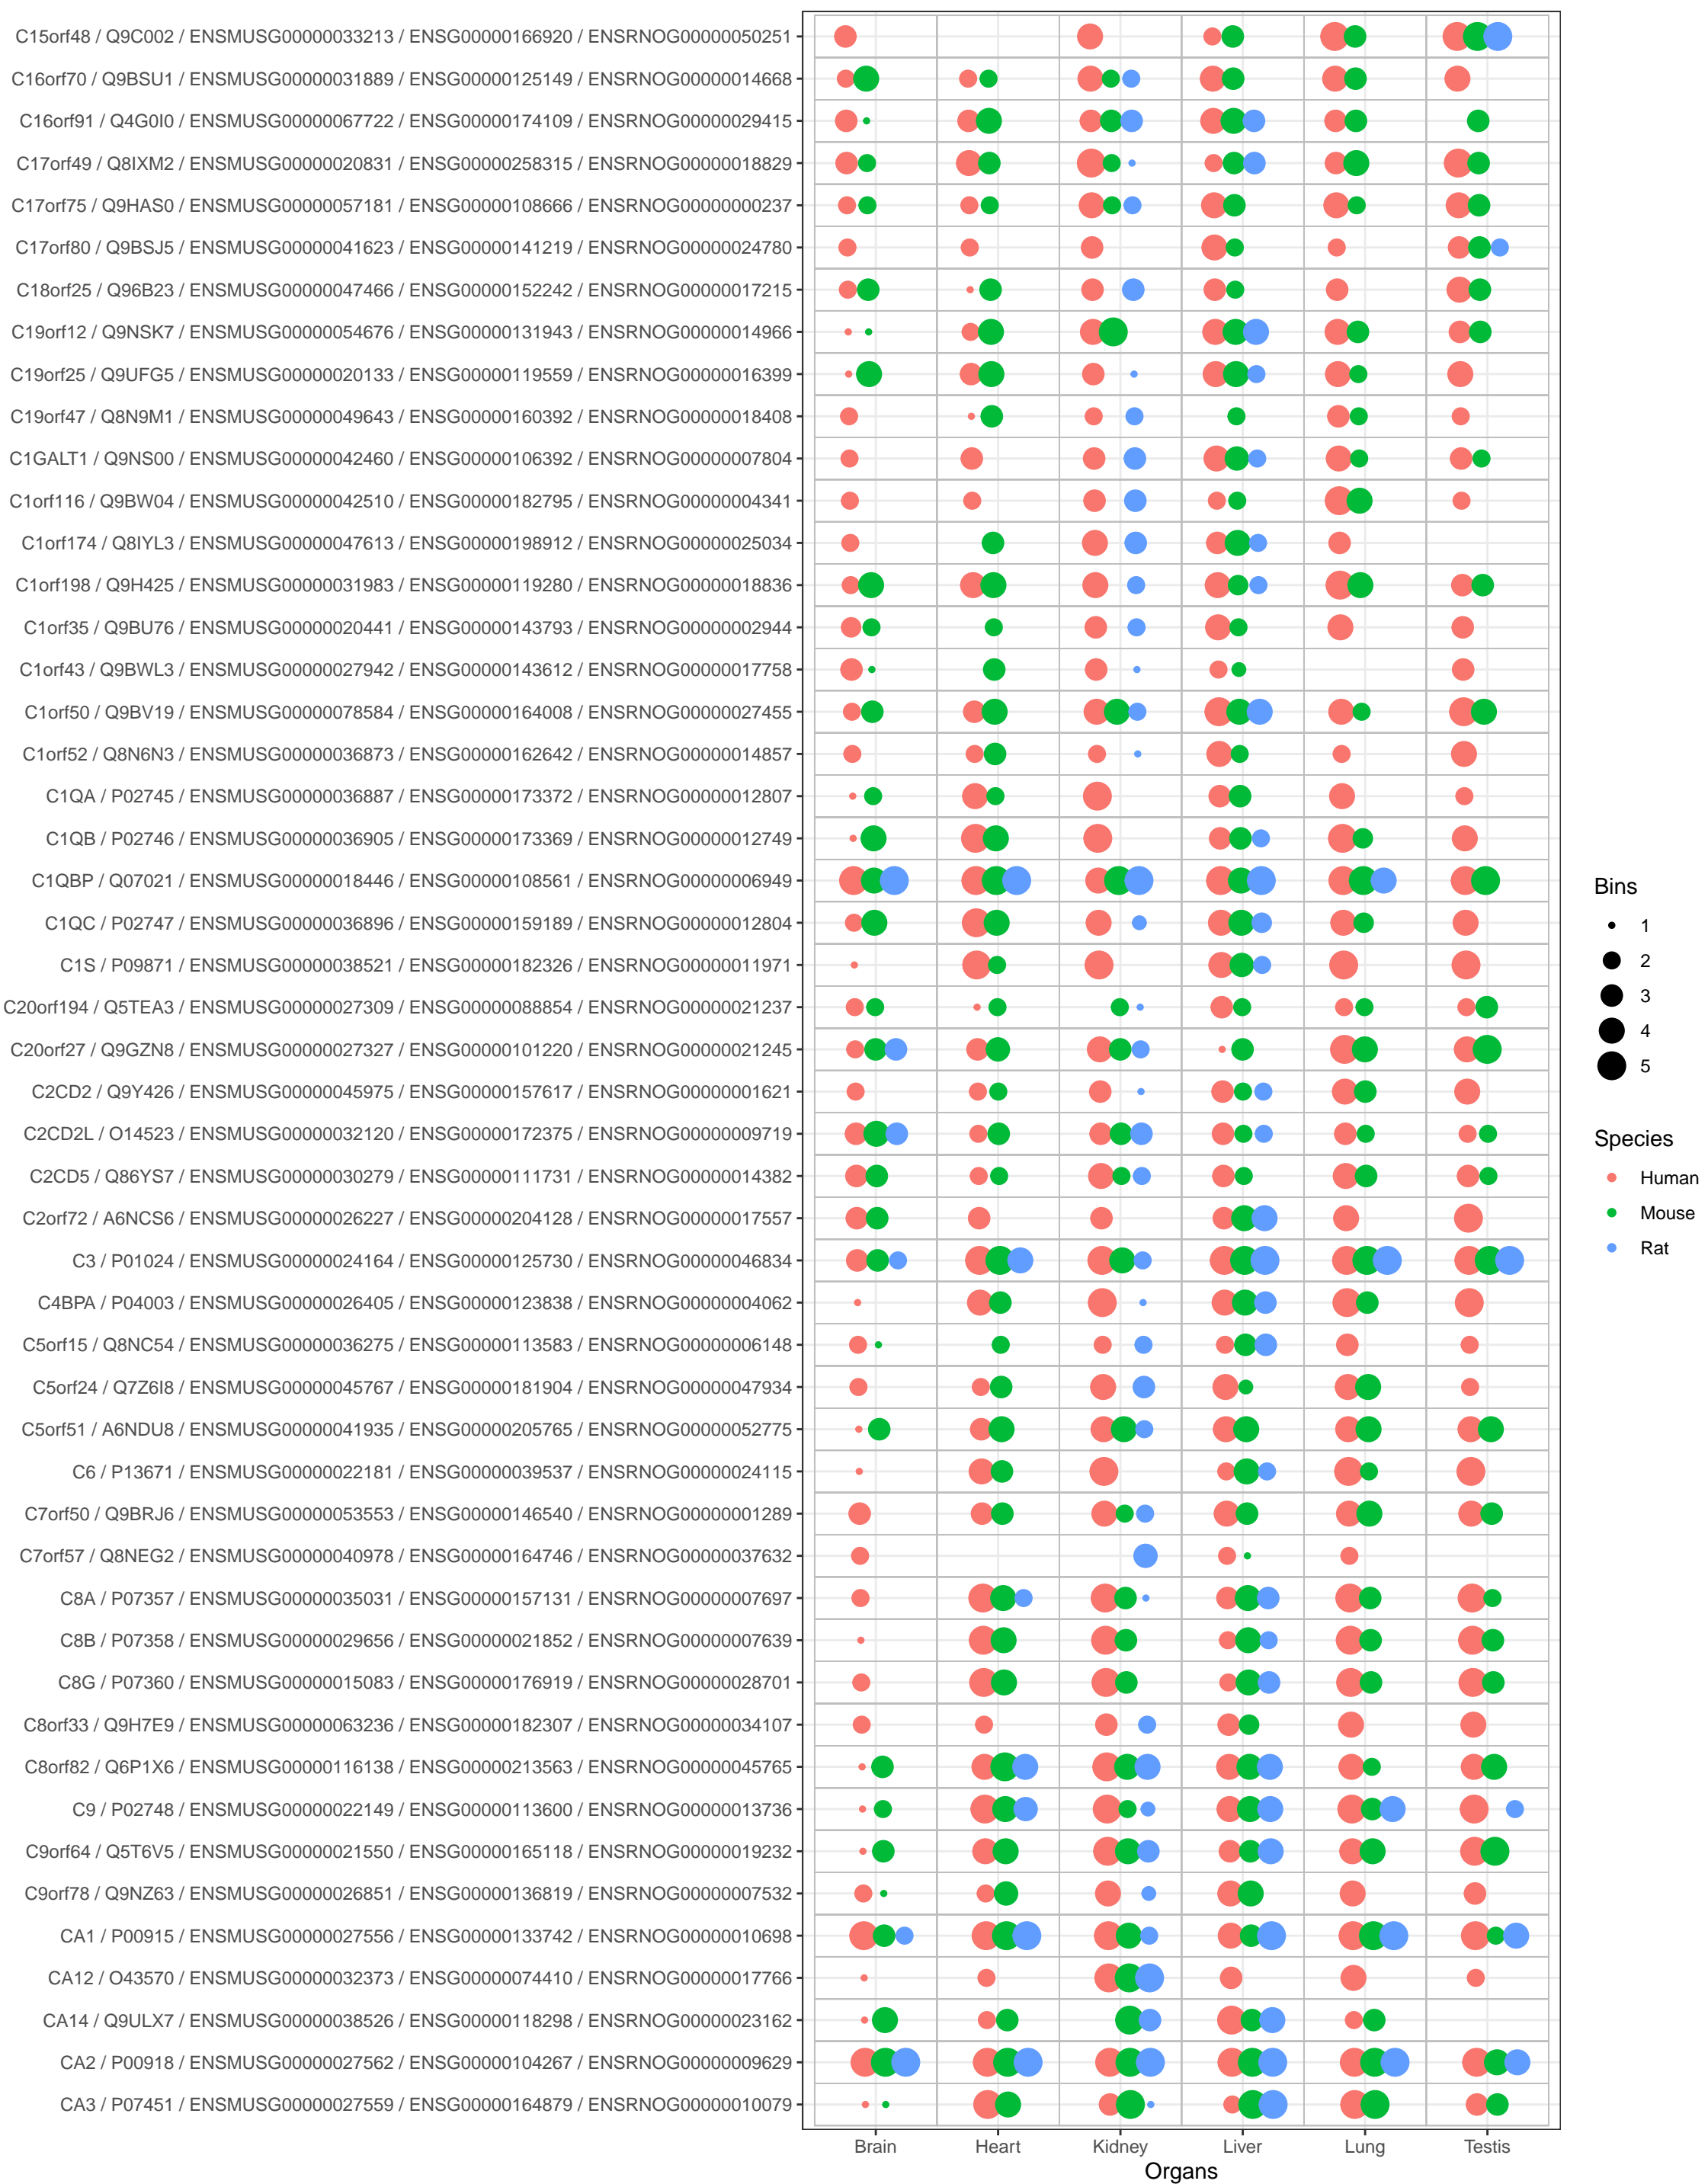

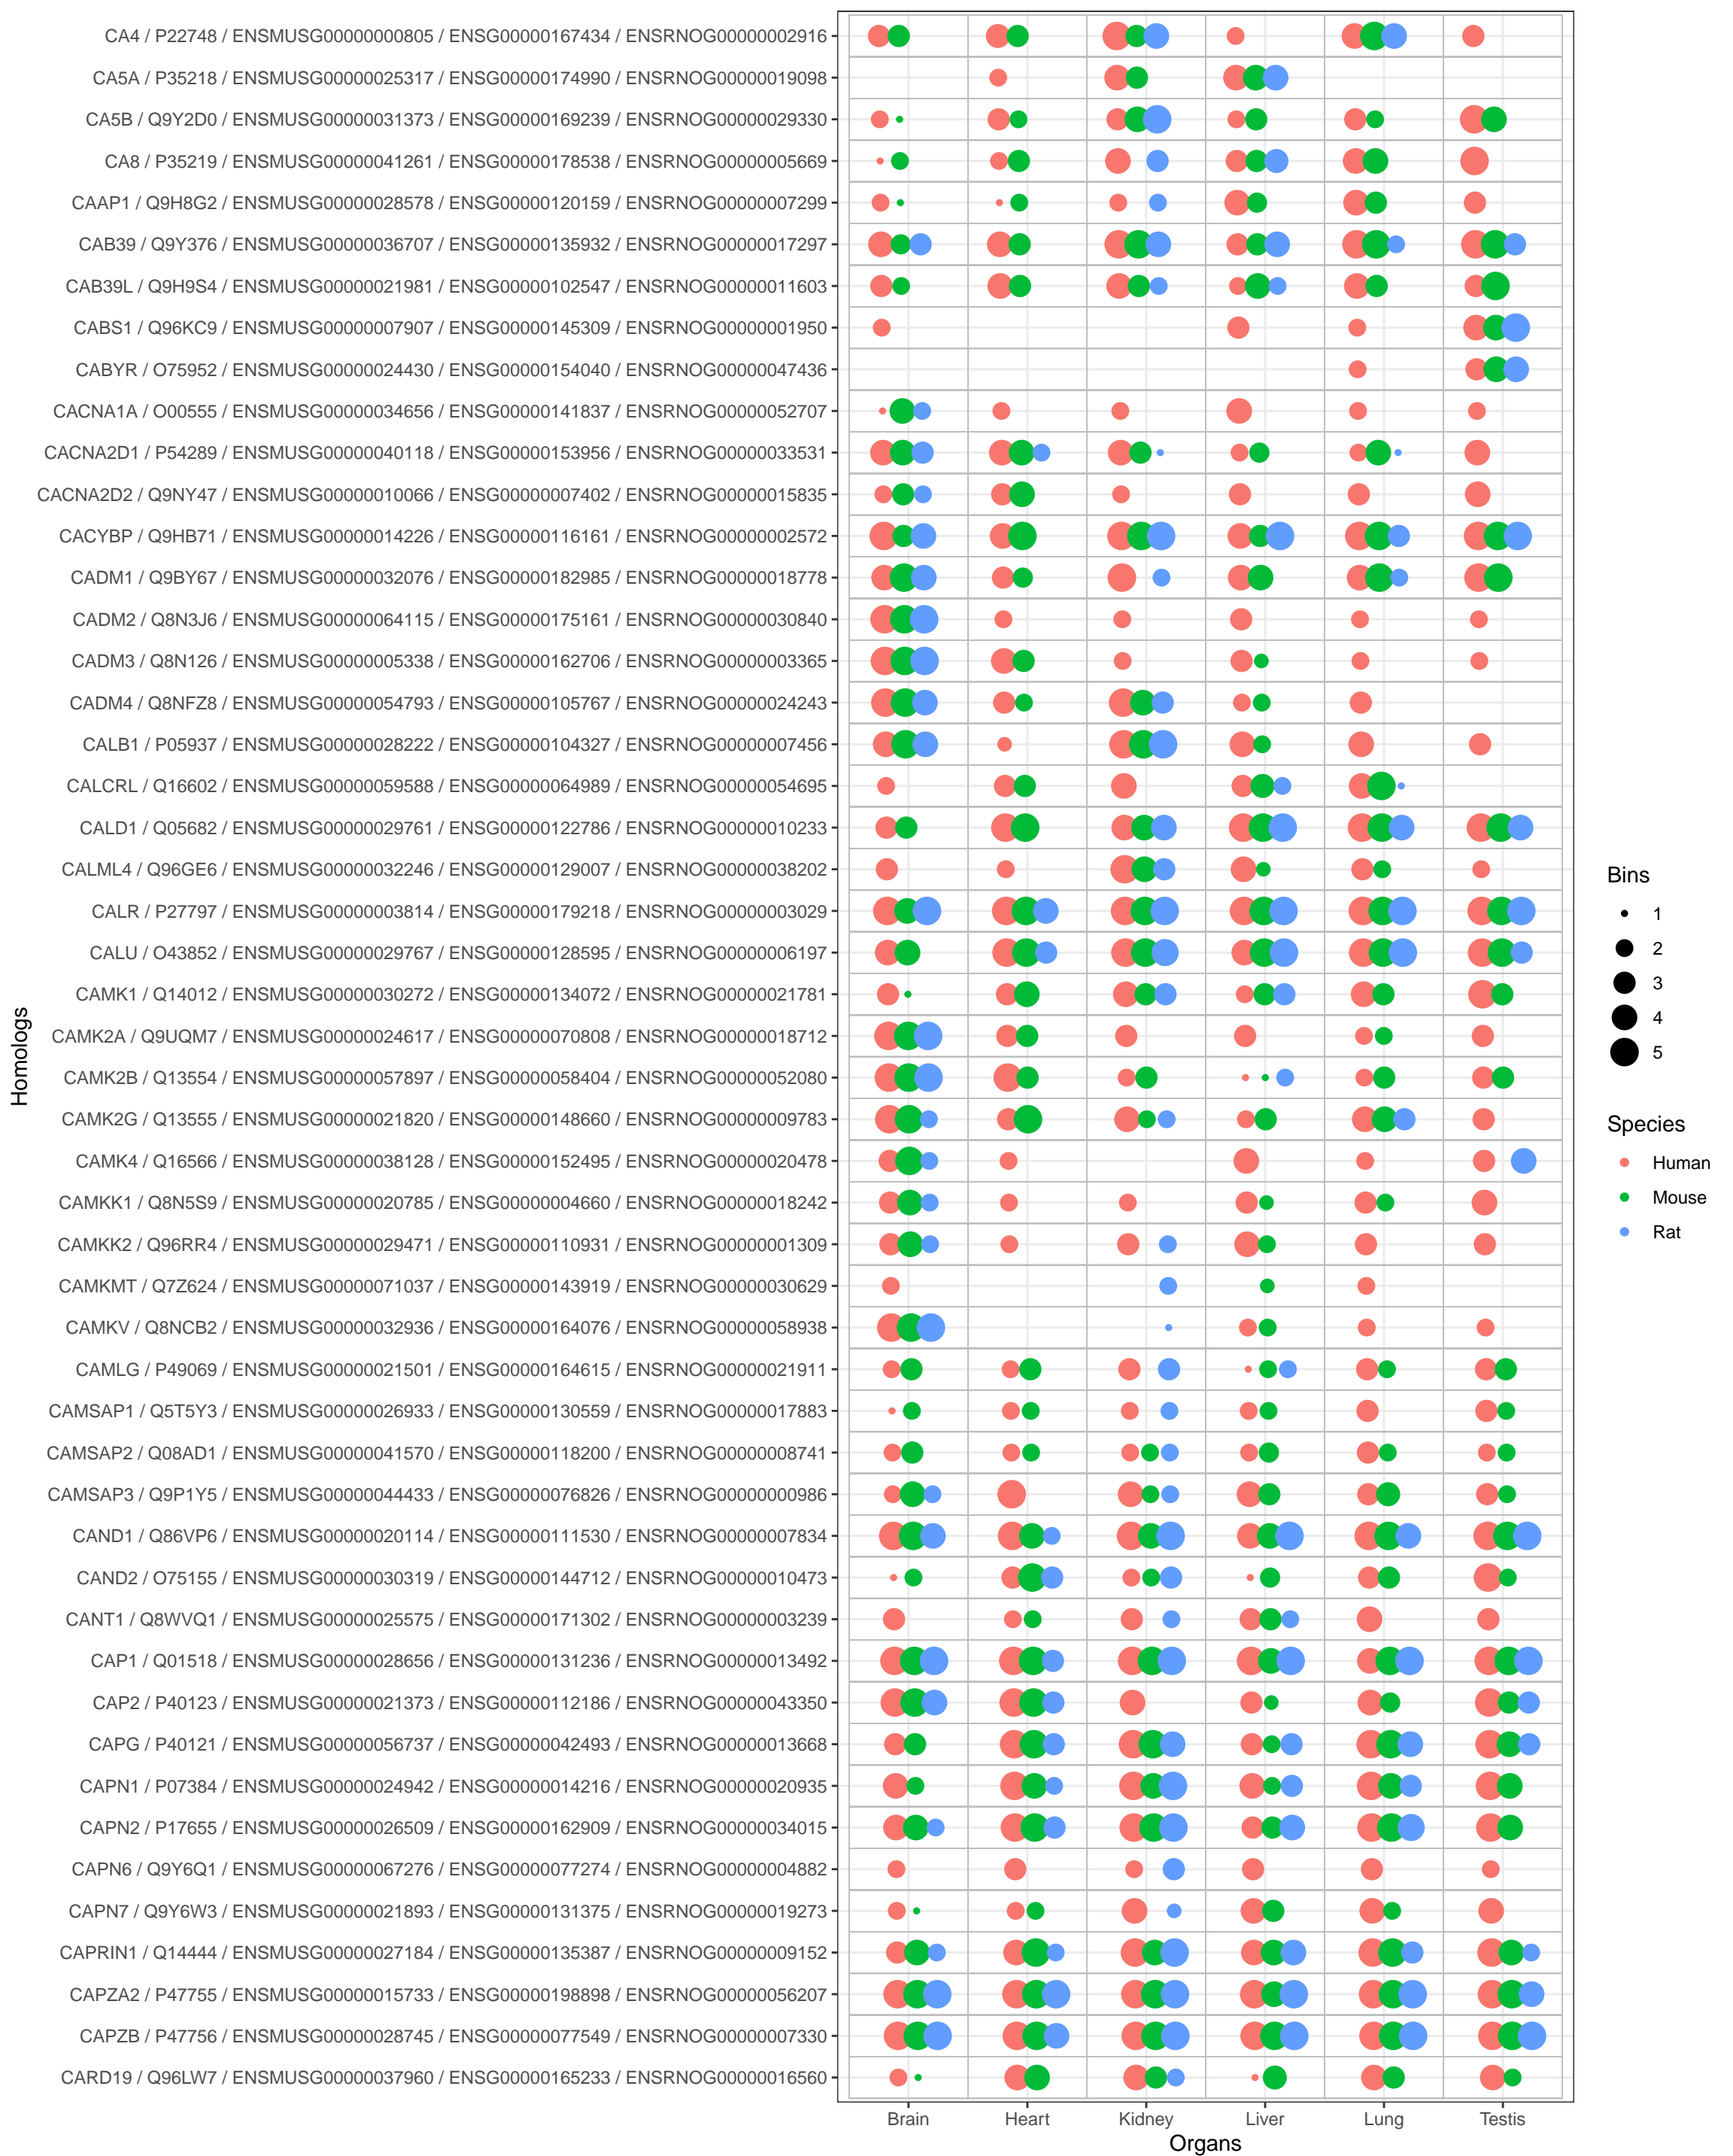

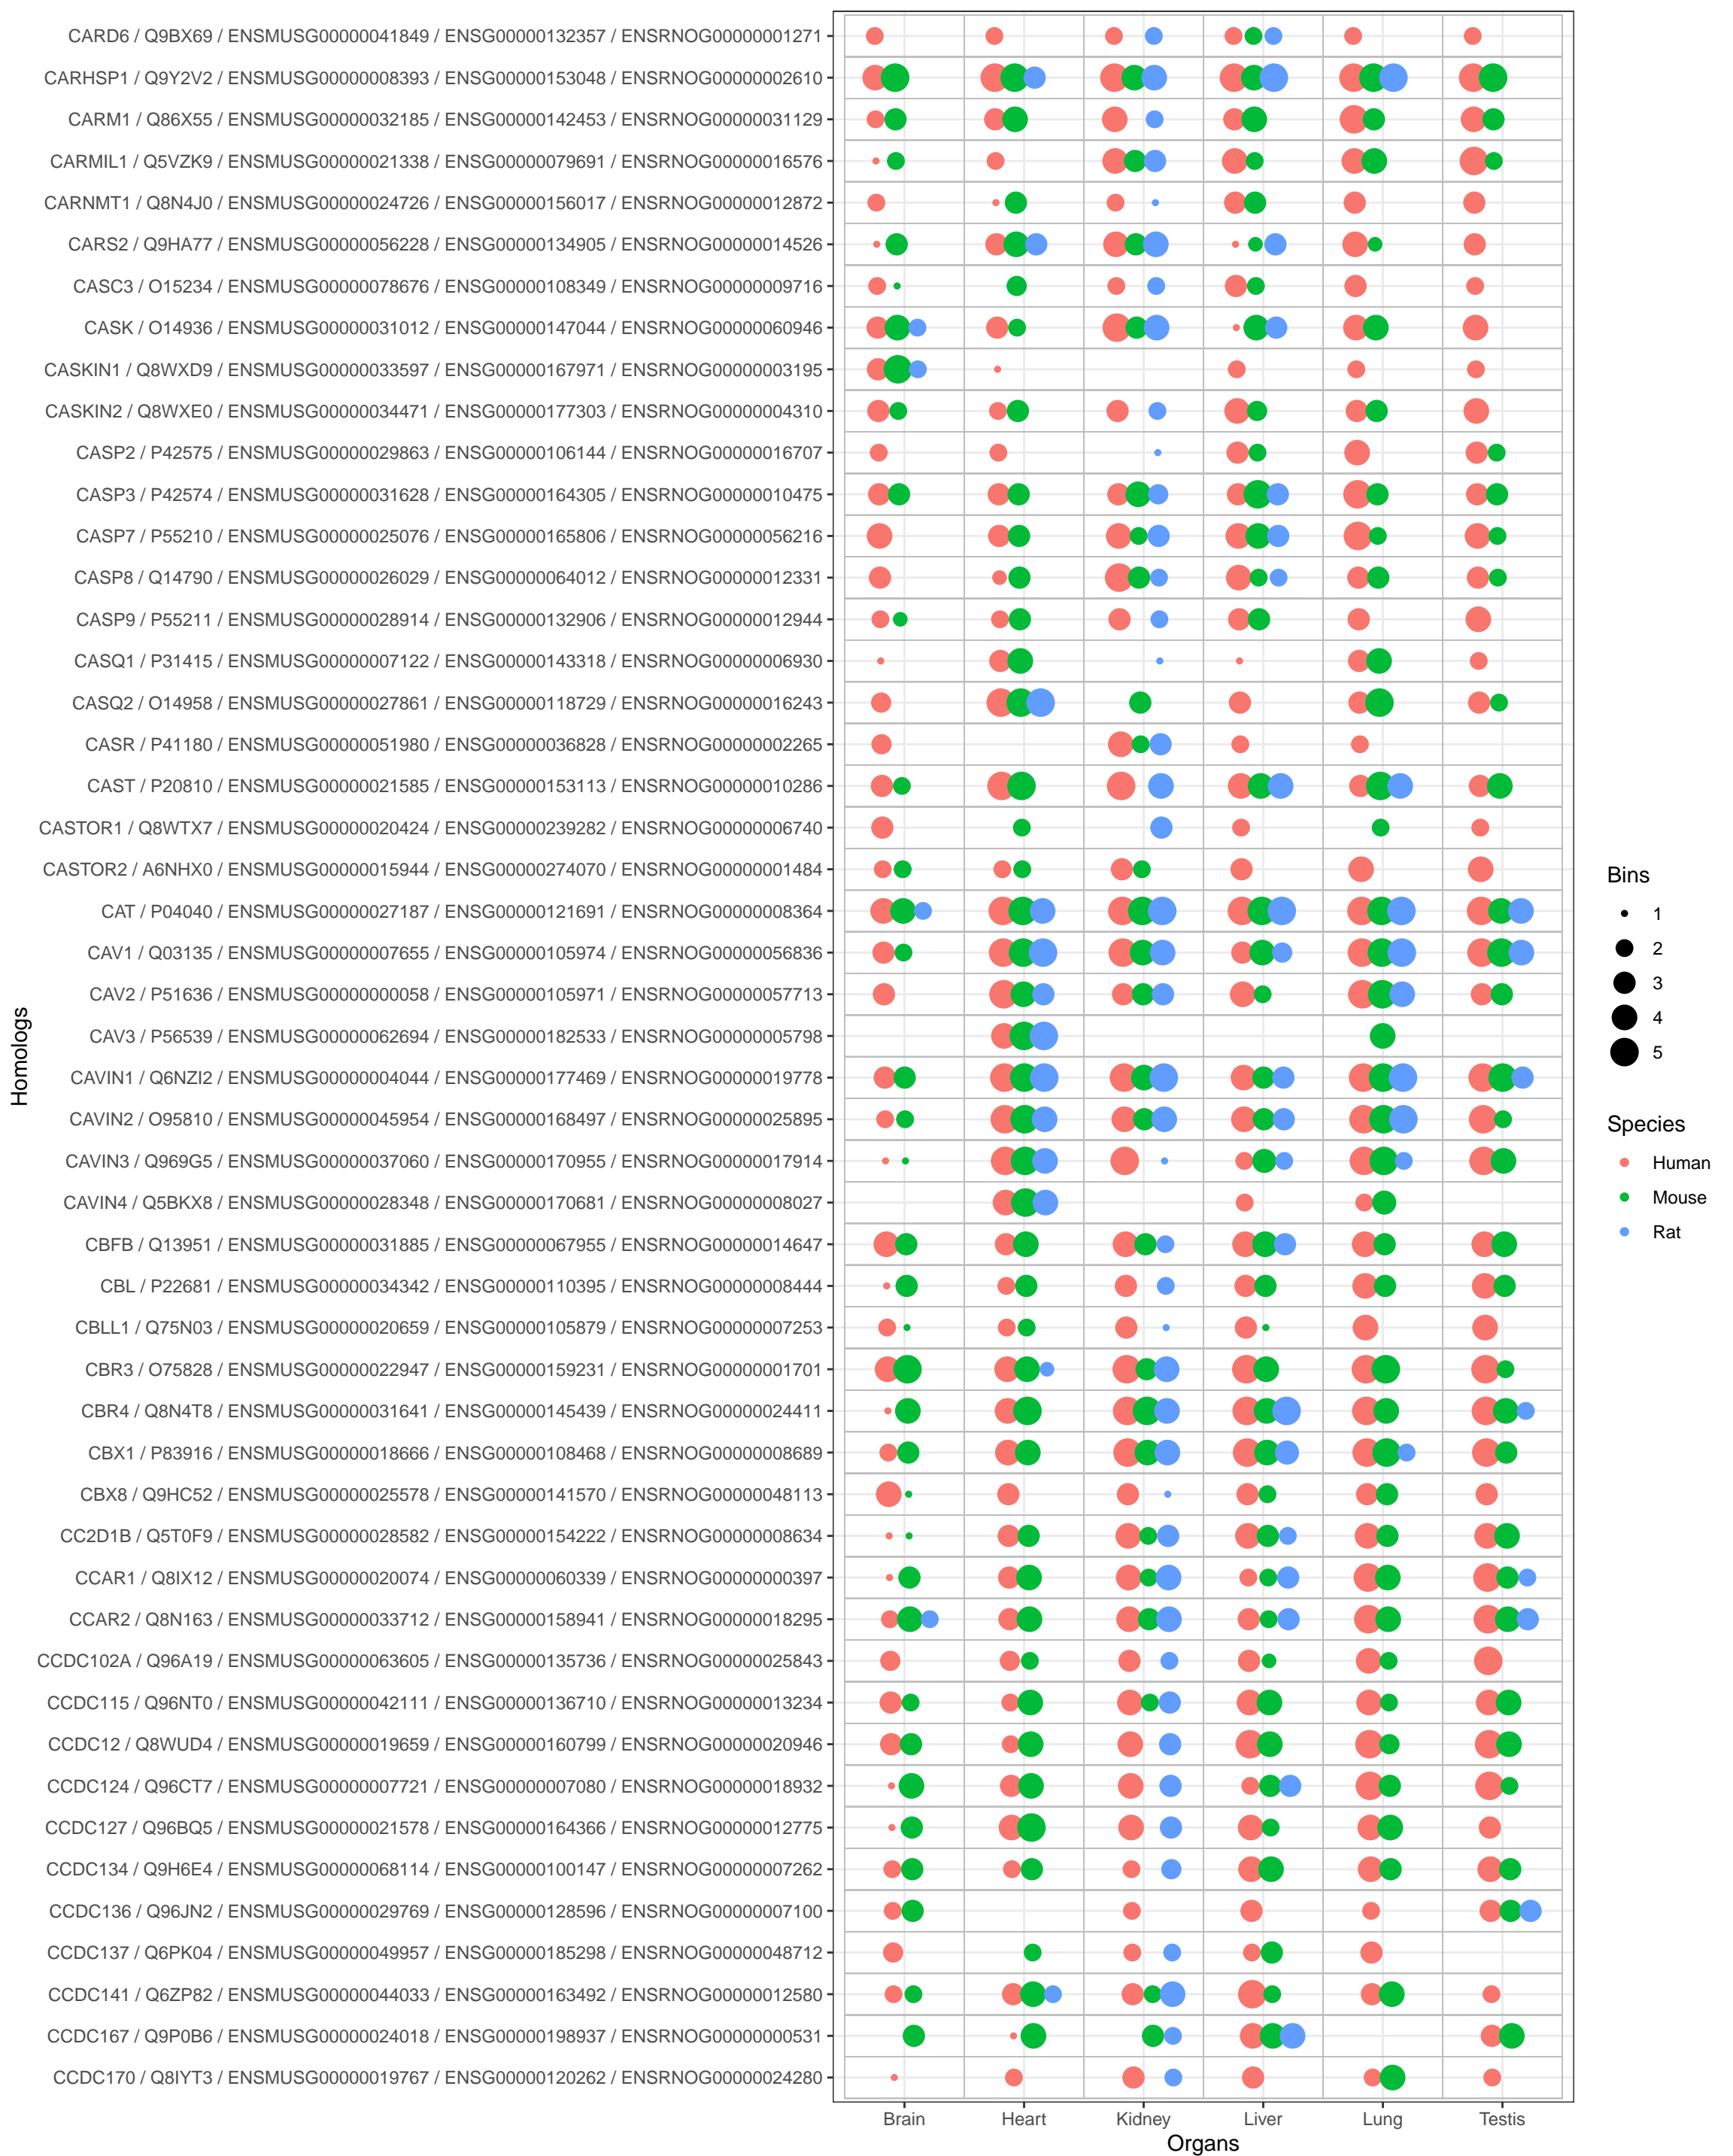



Homologs

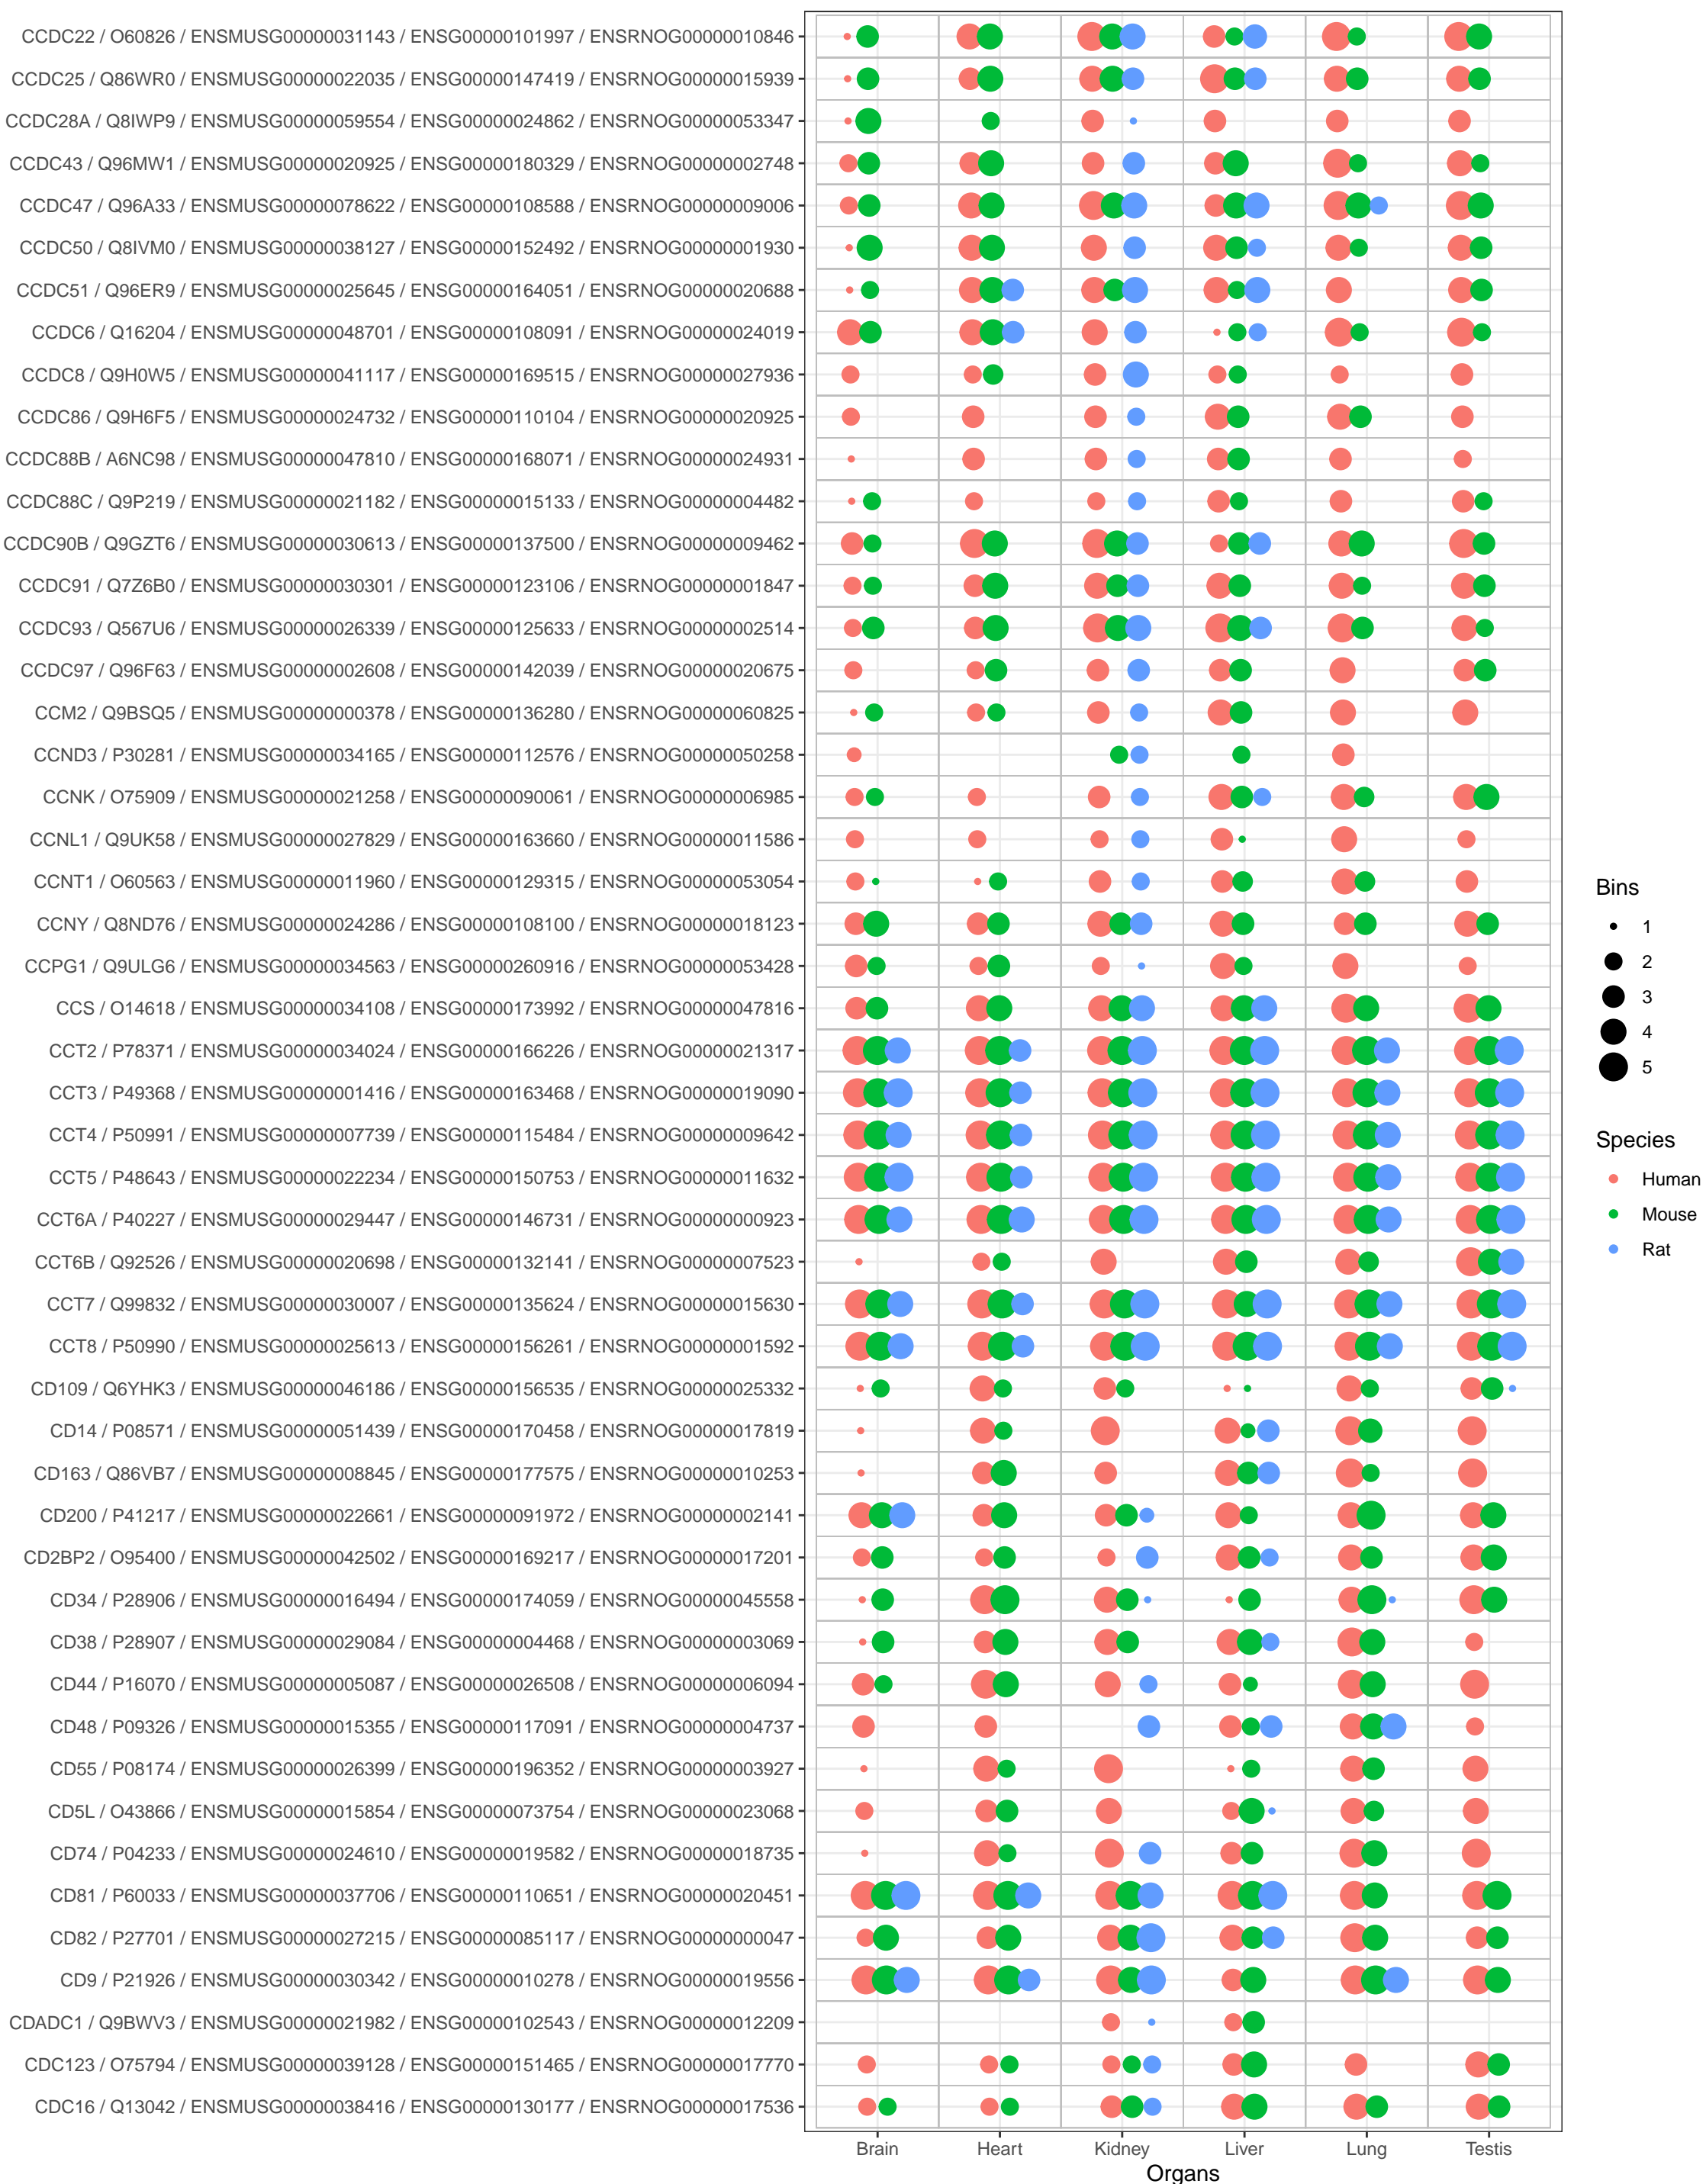

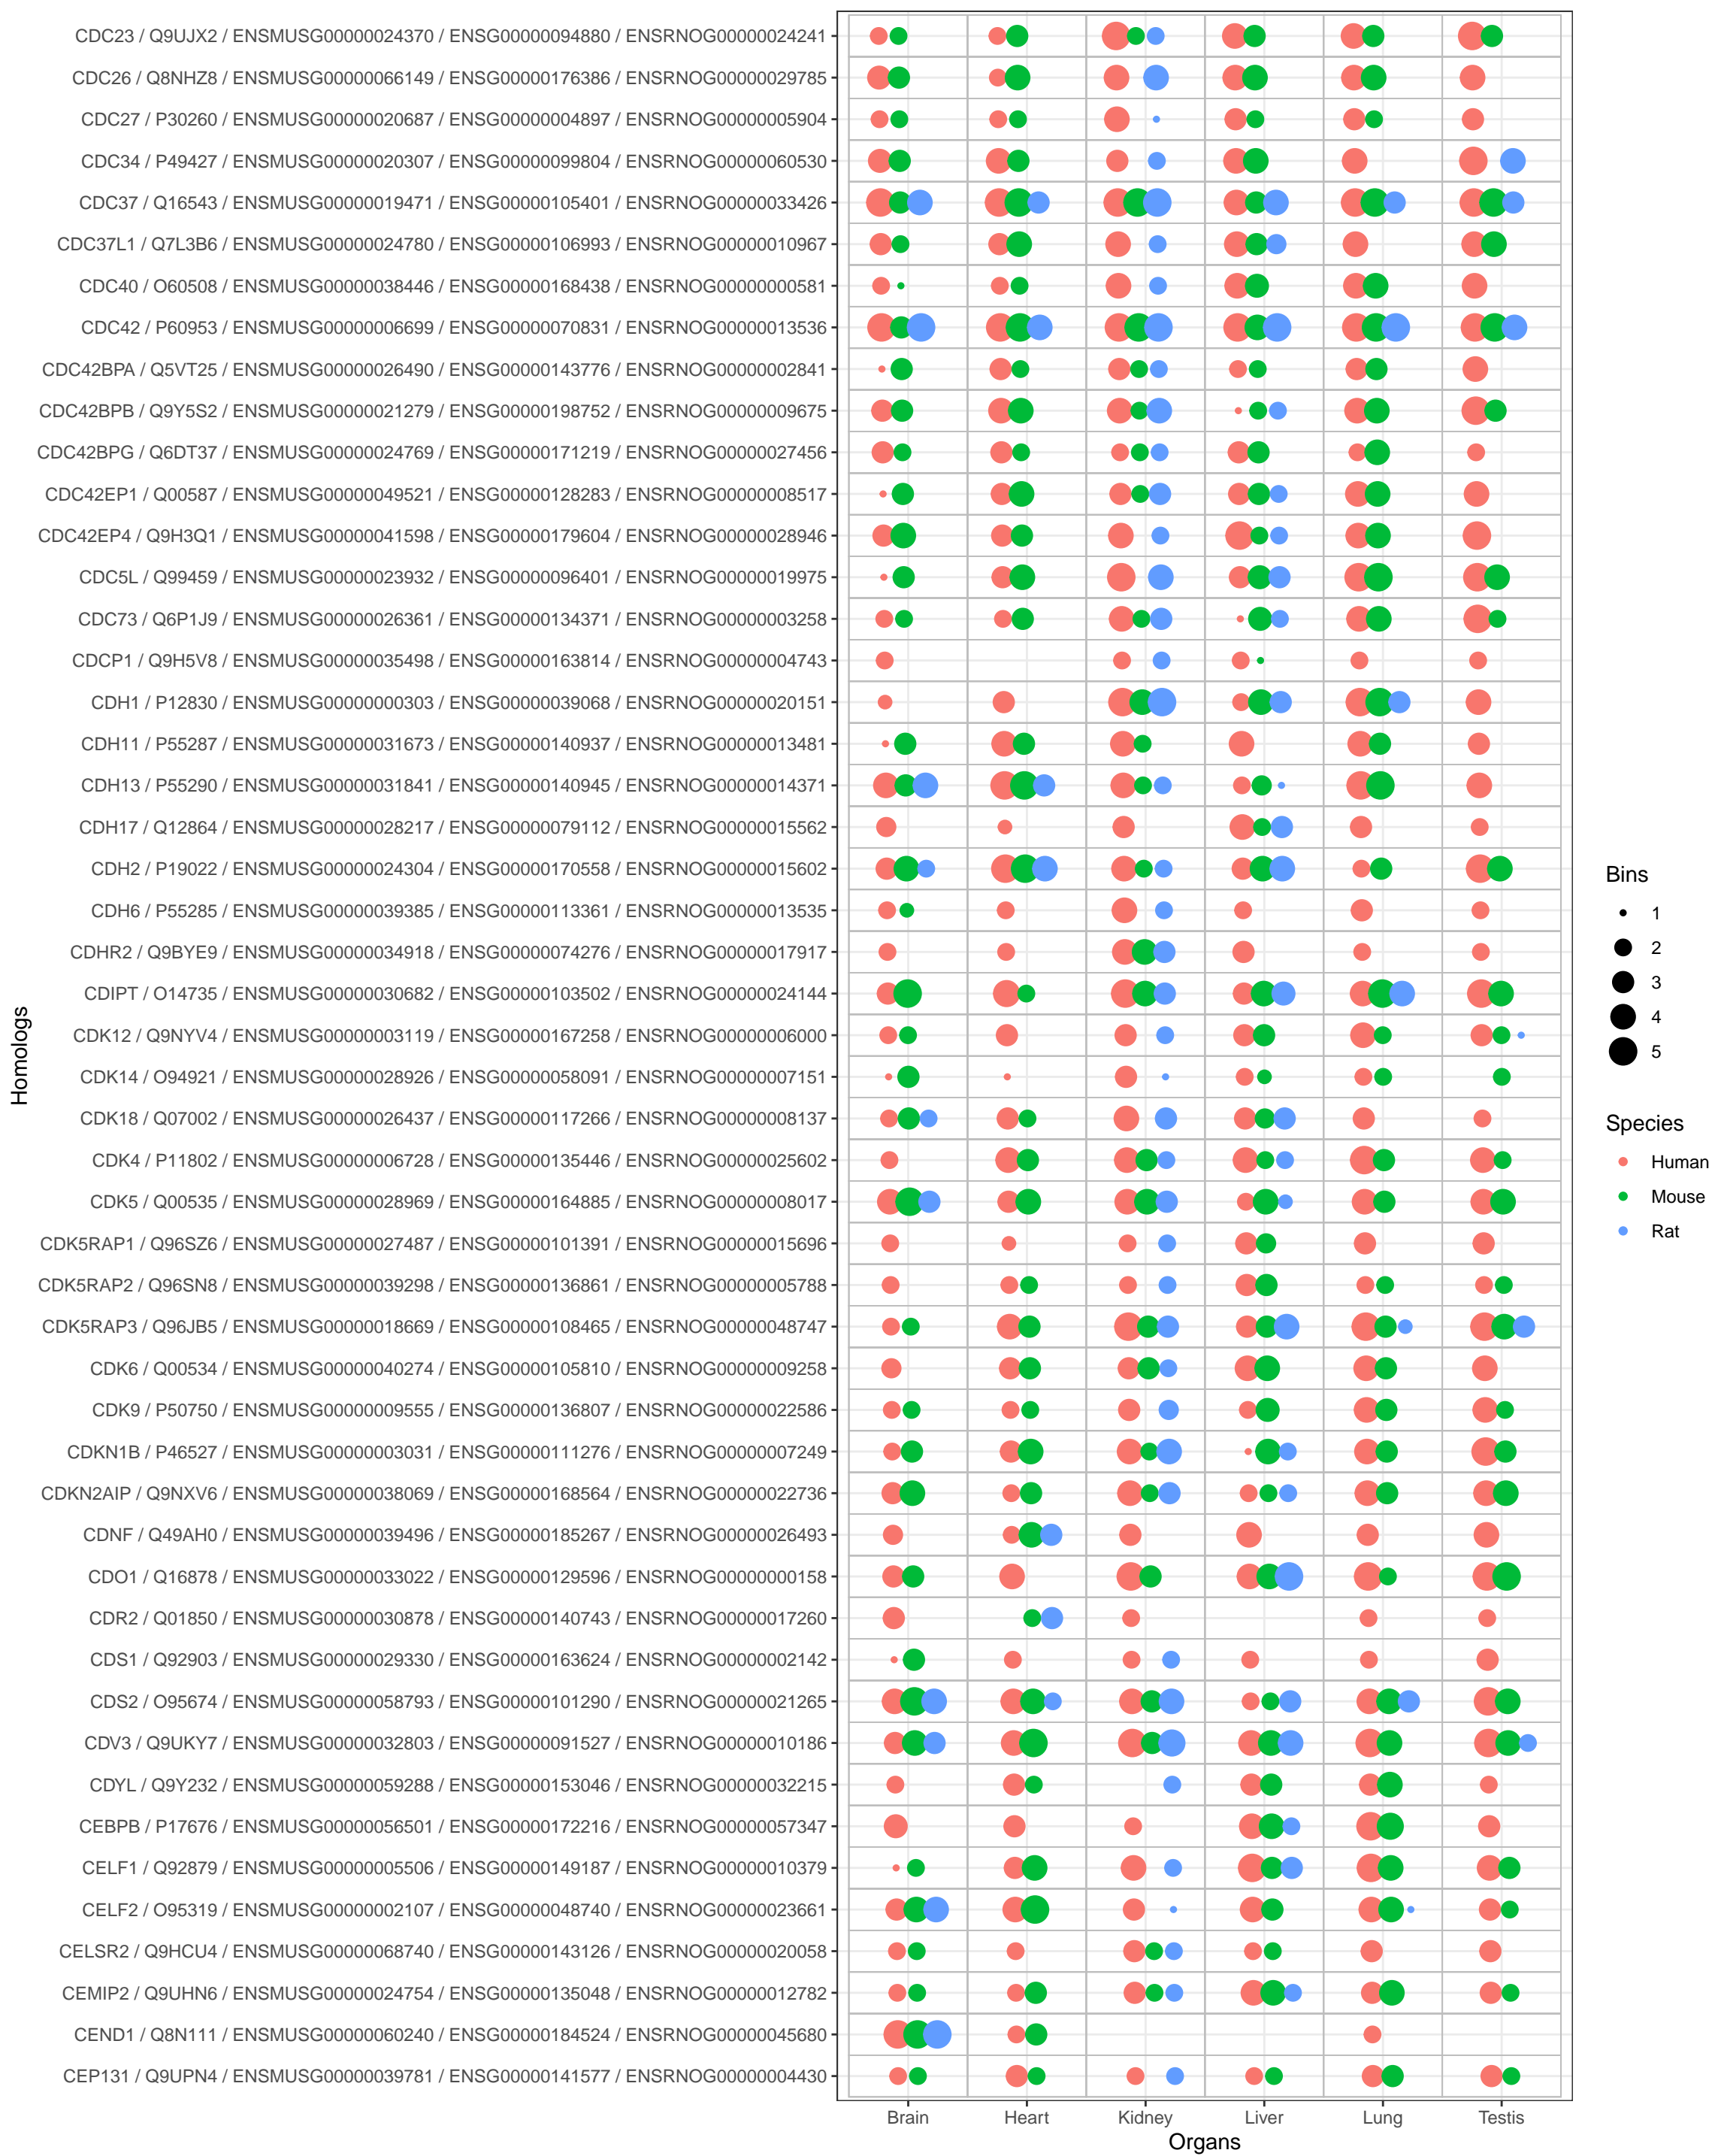

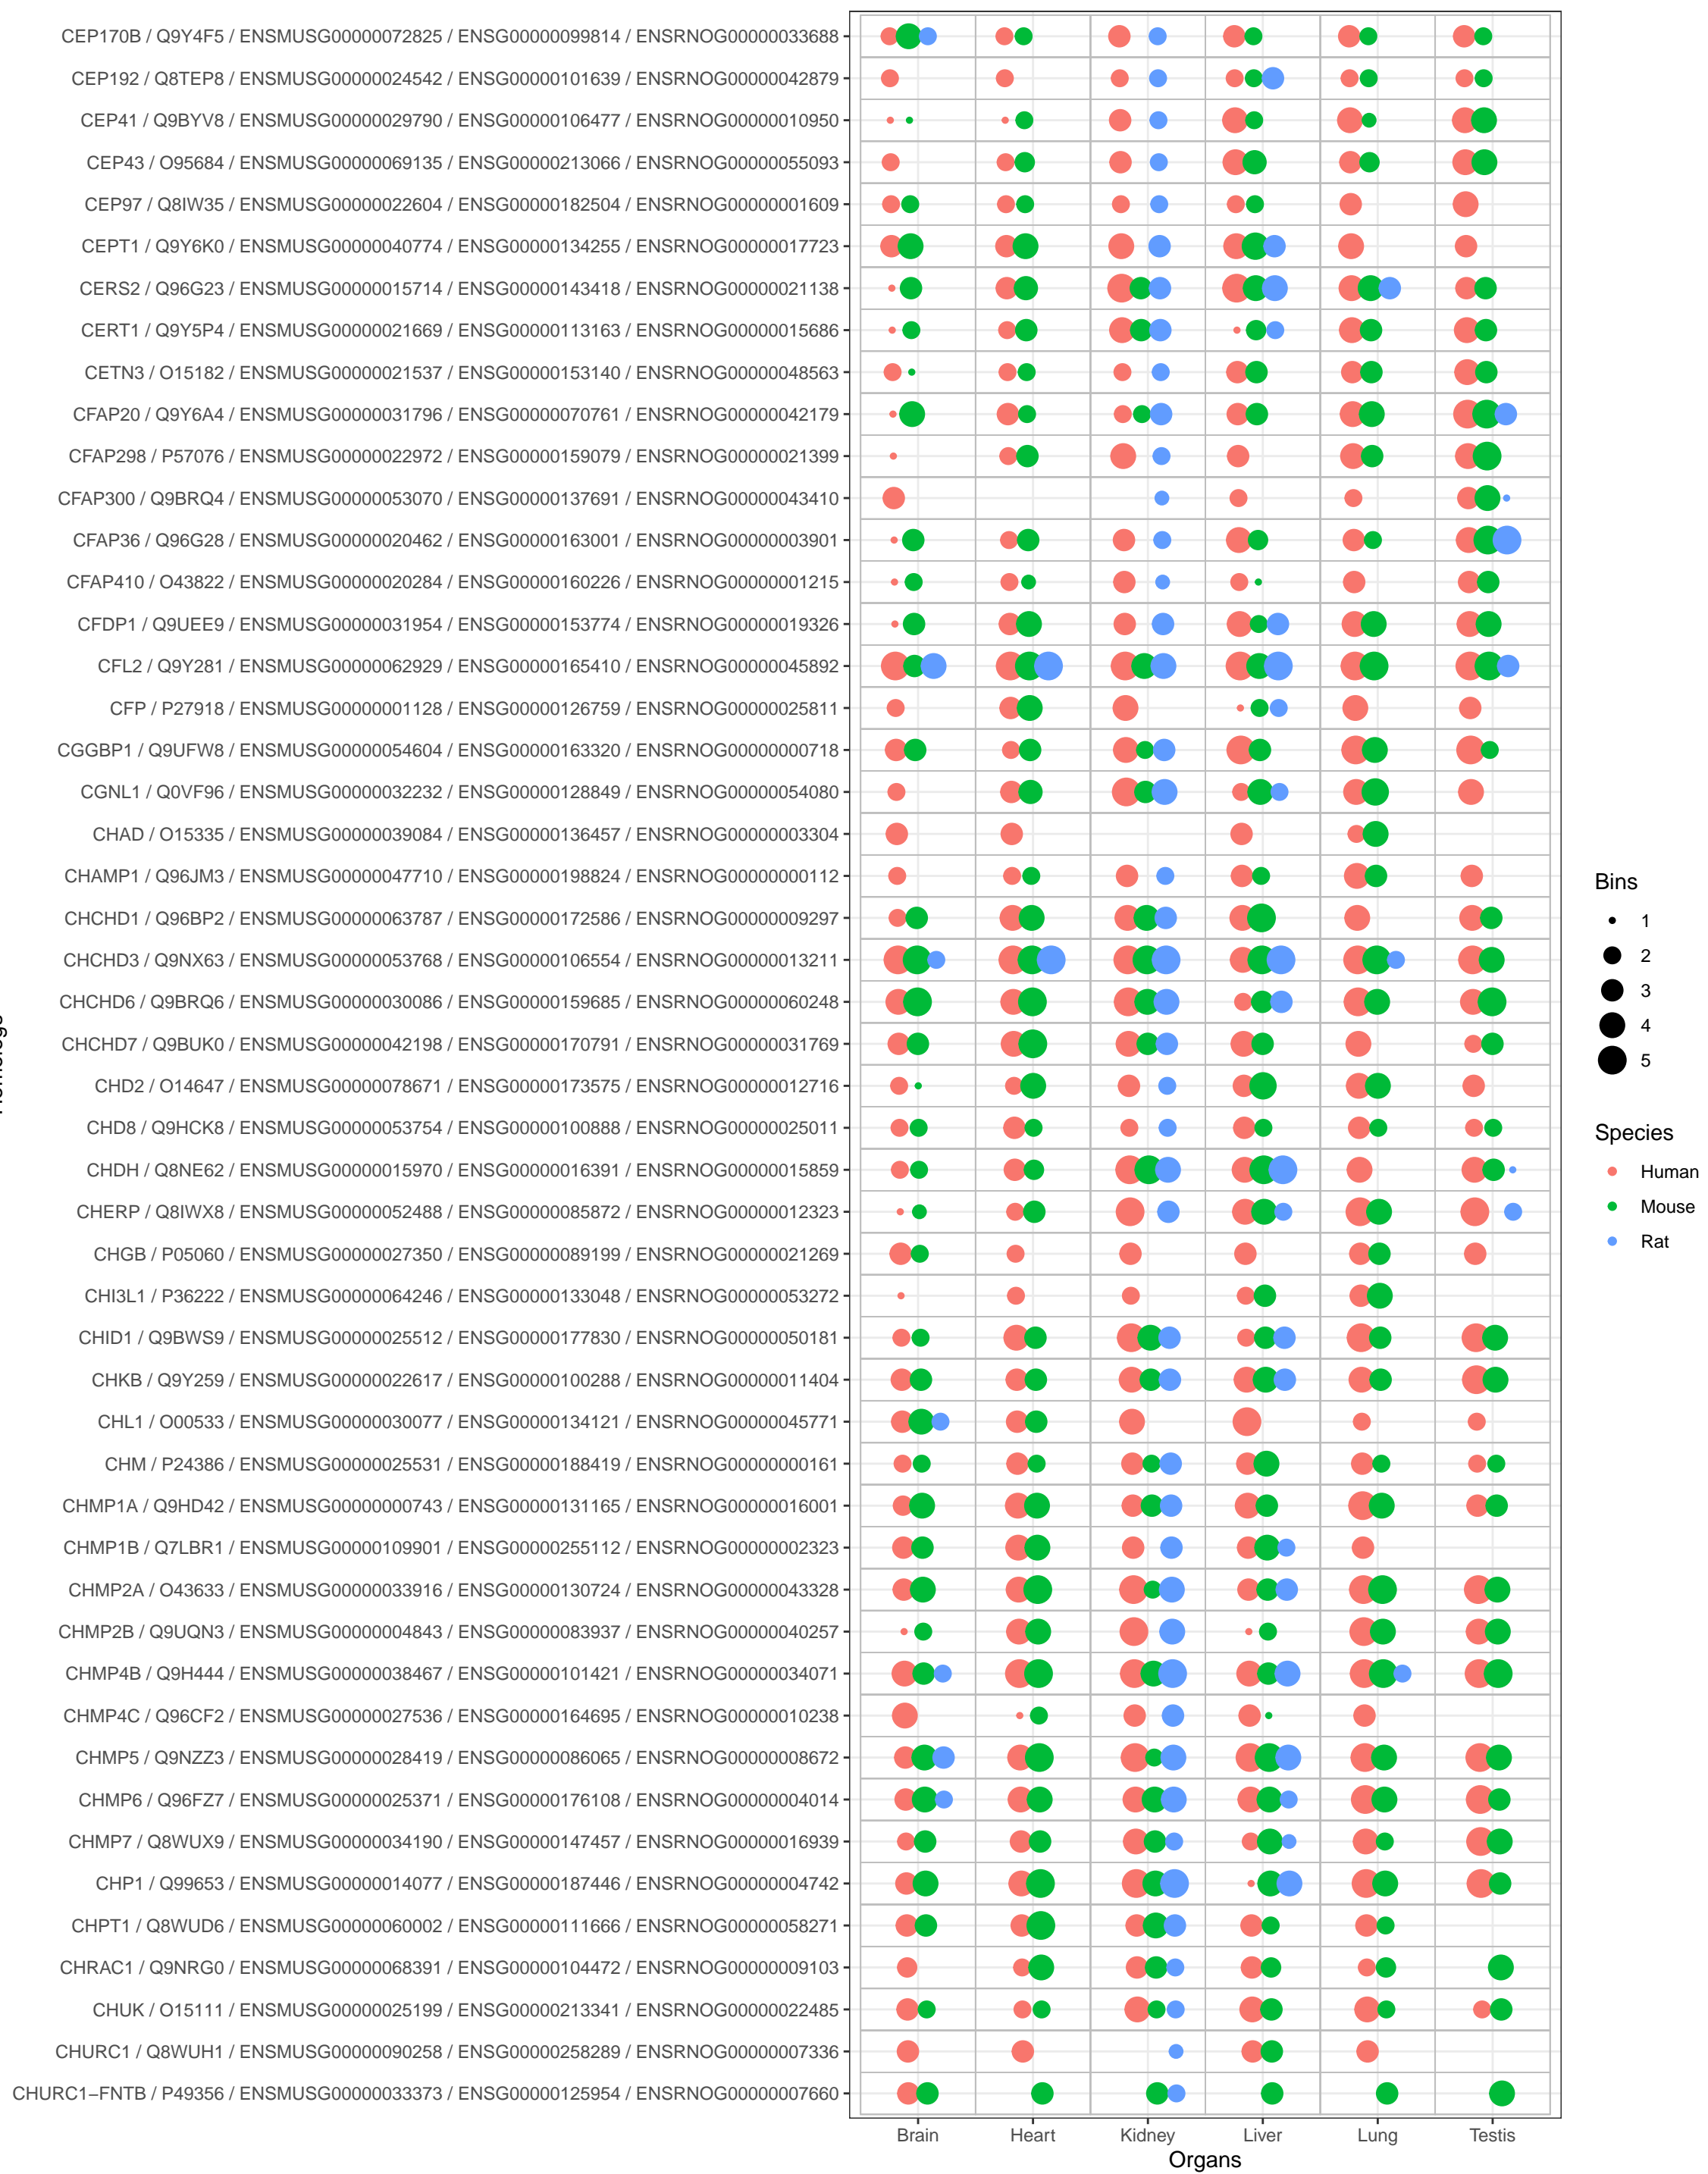

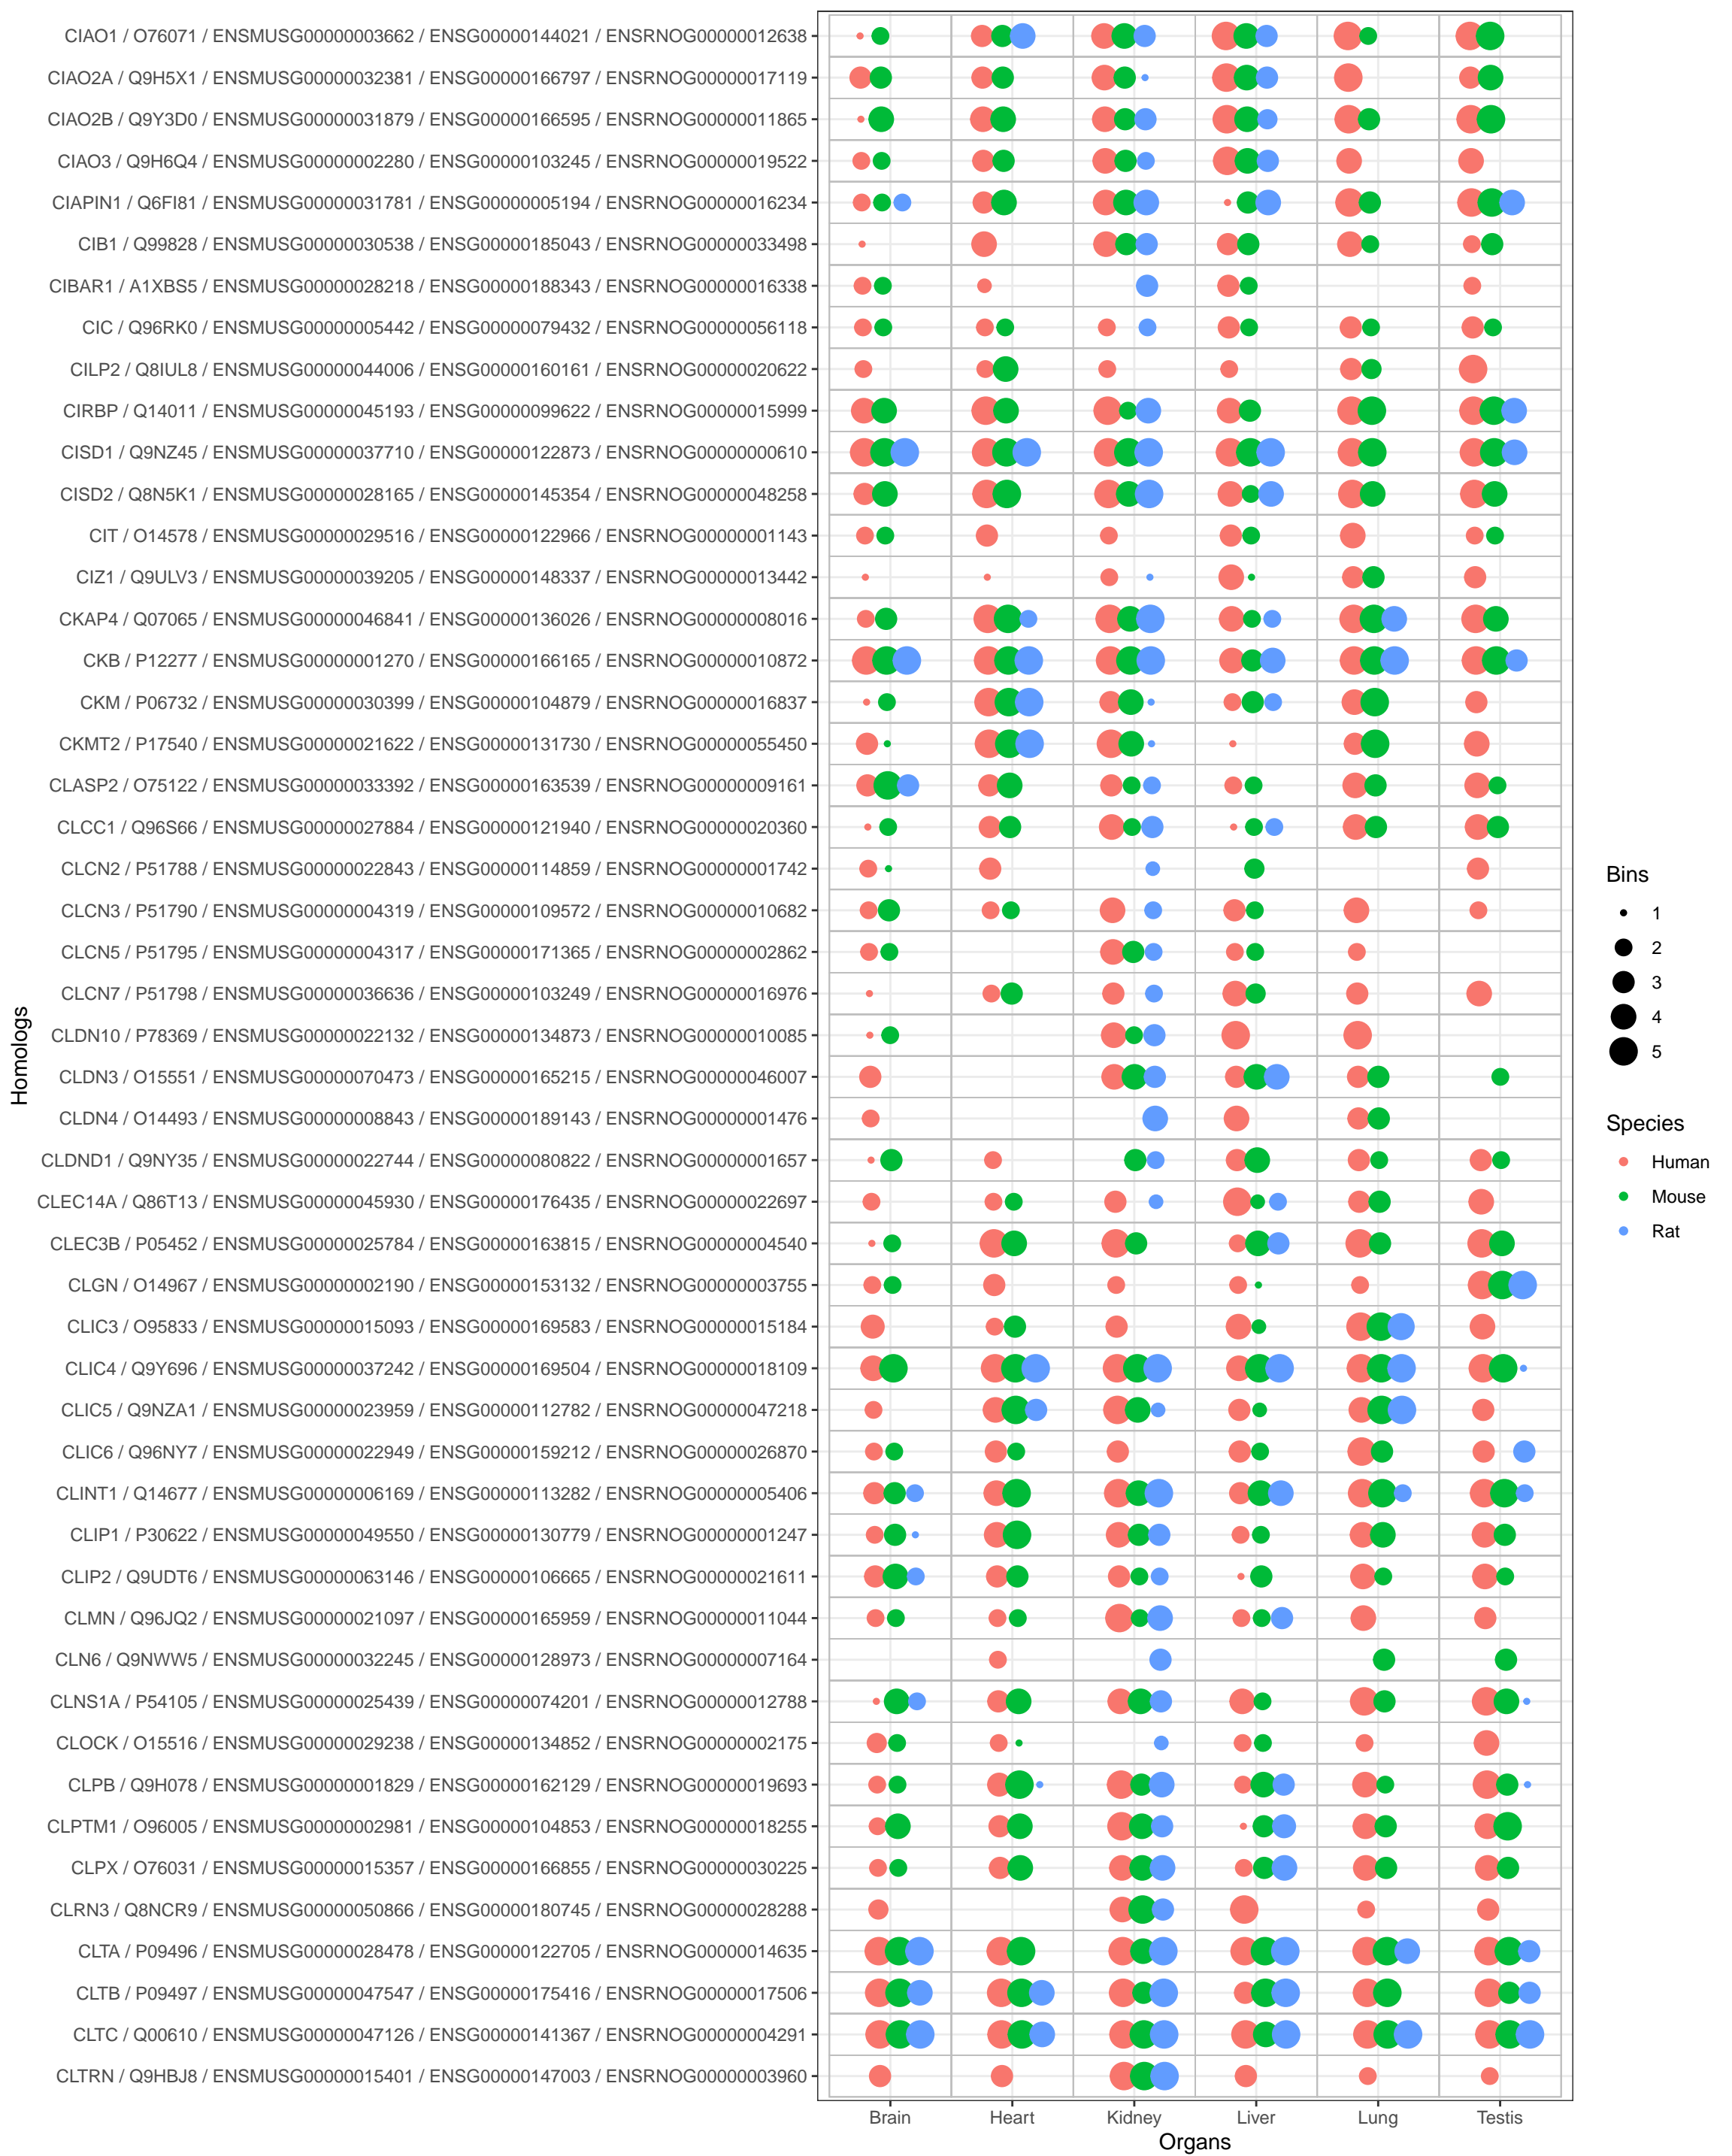

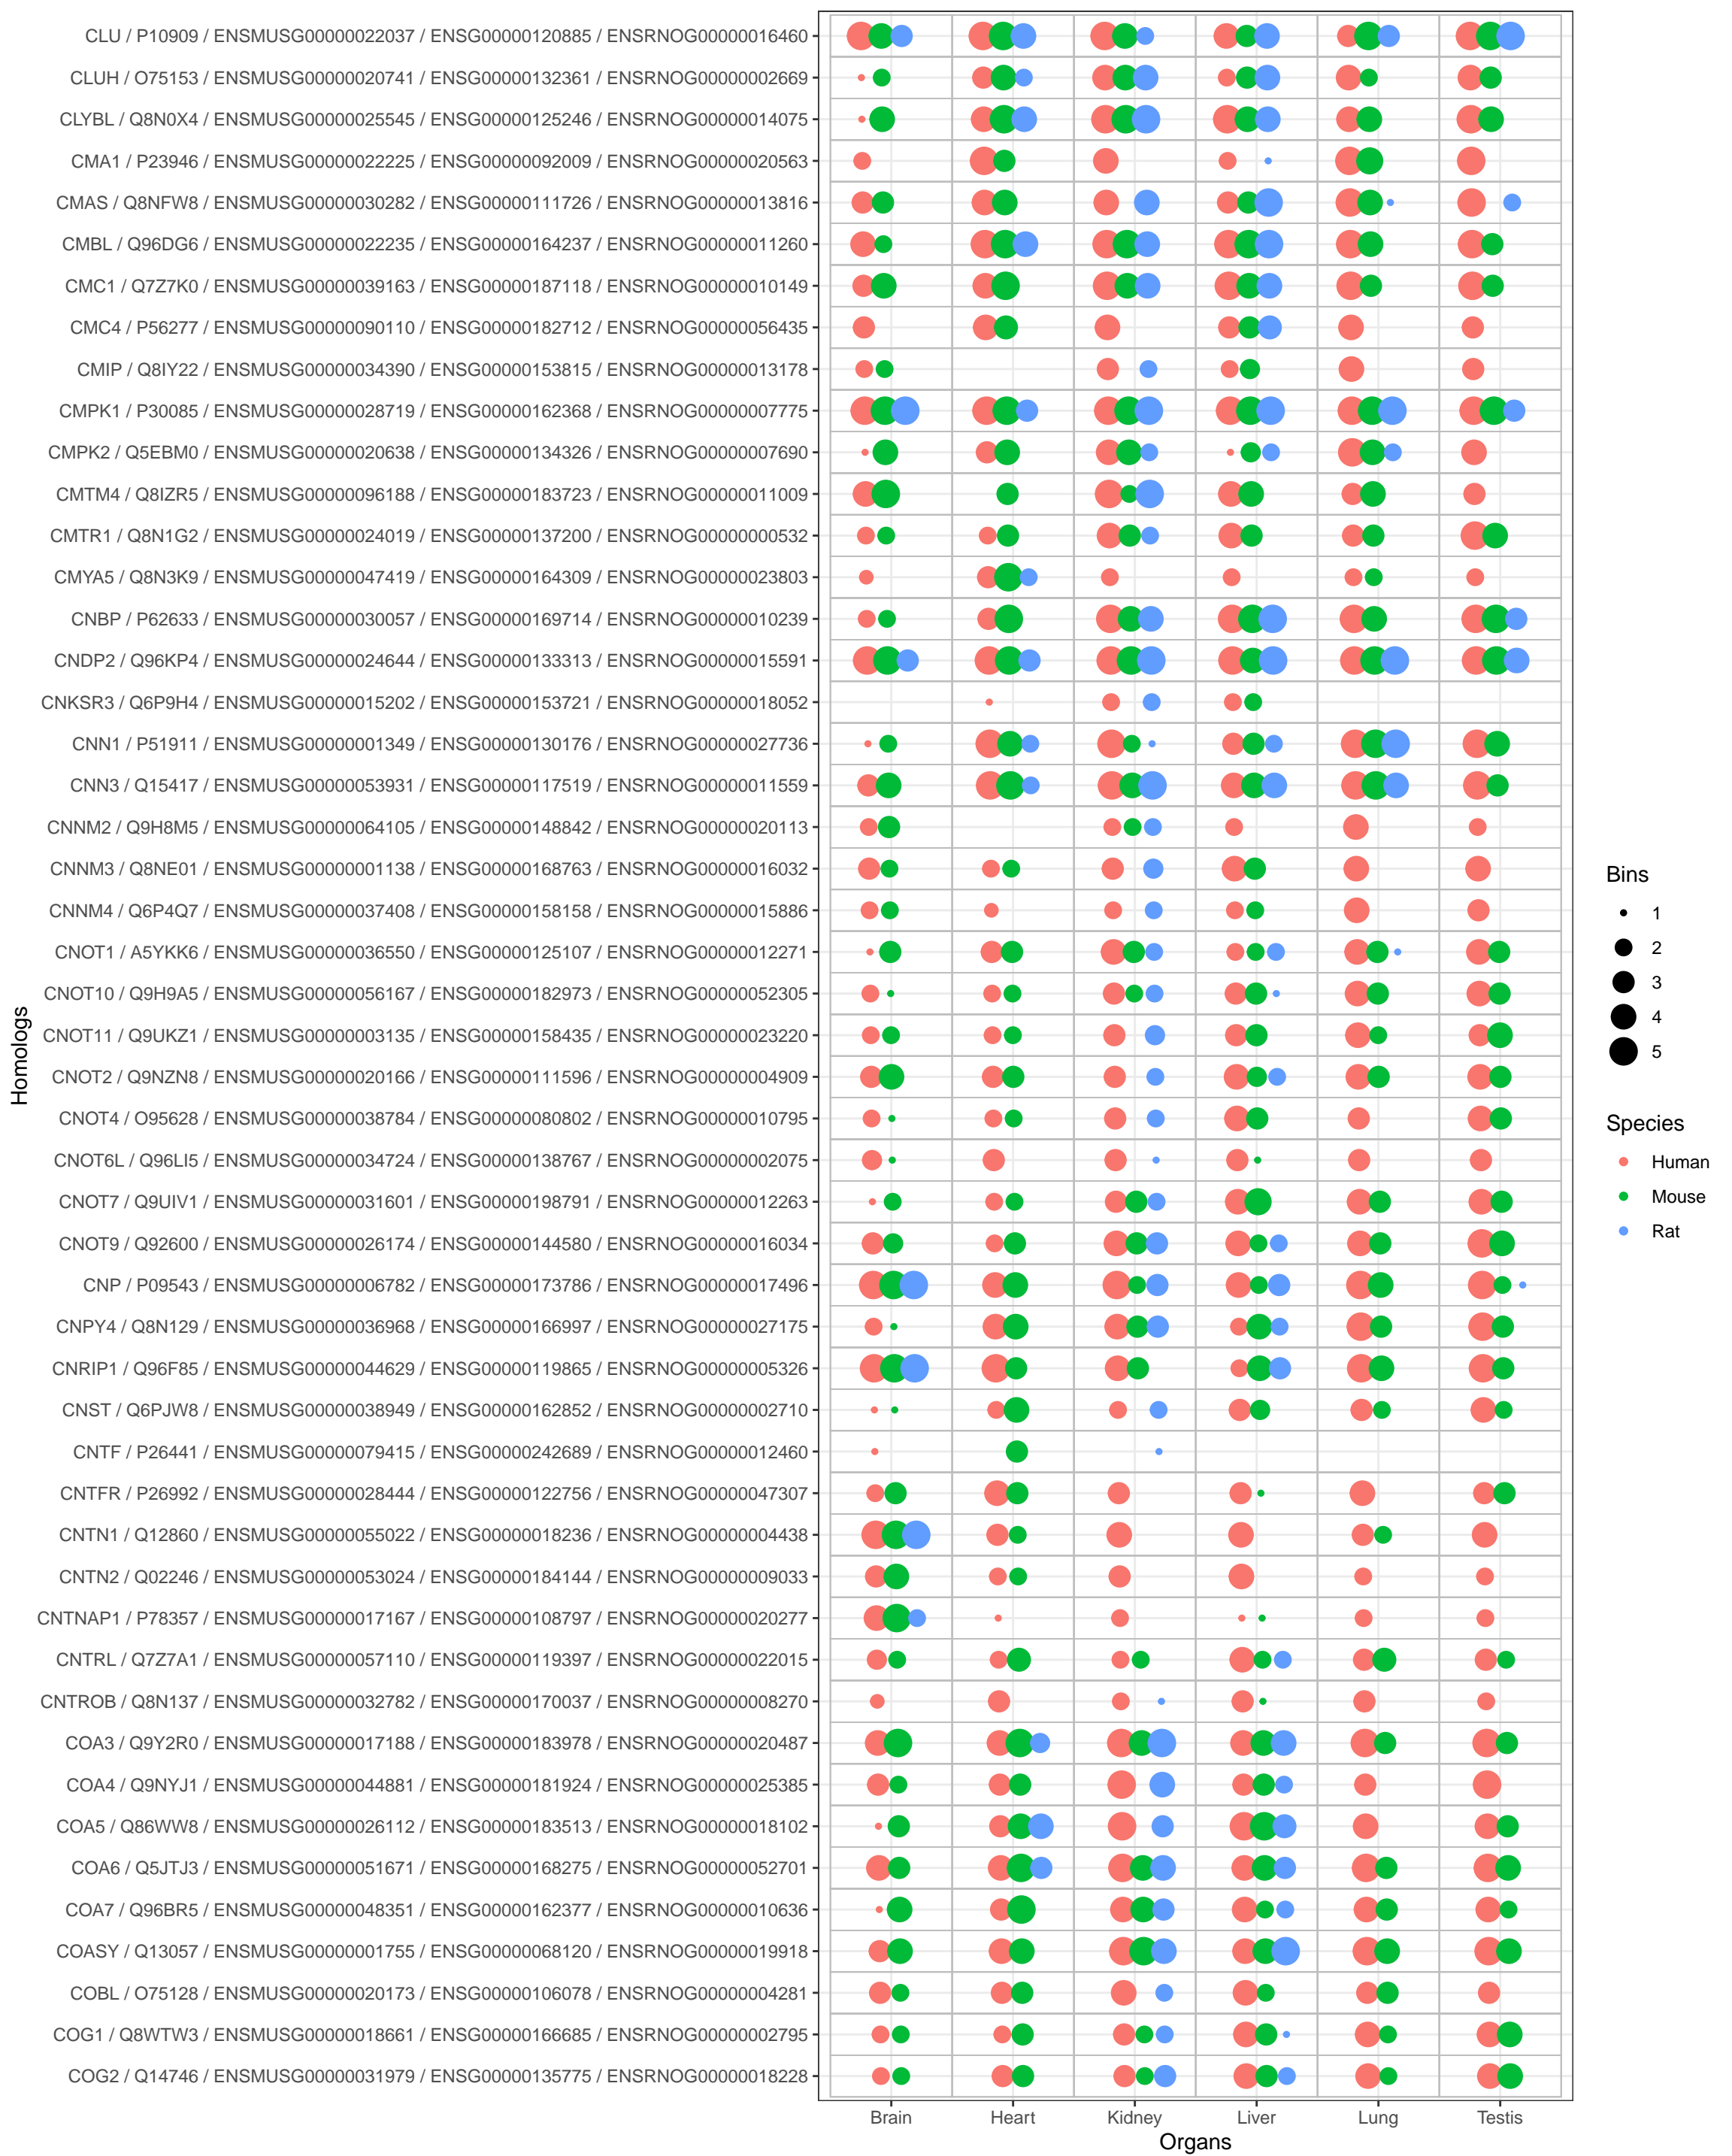

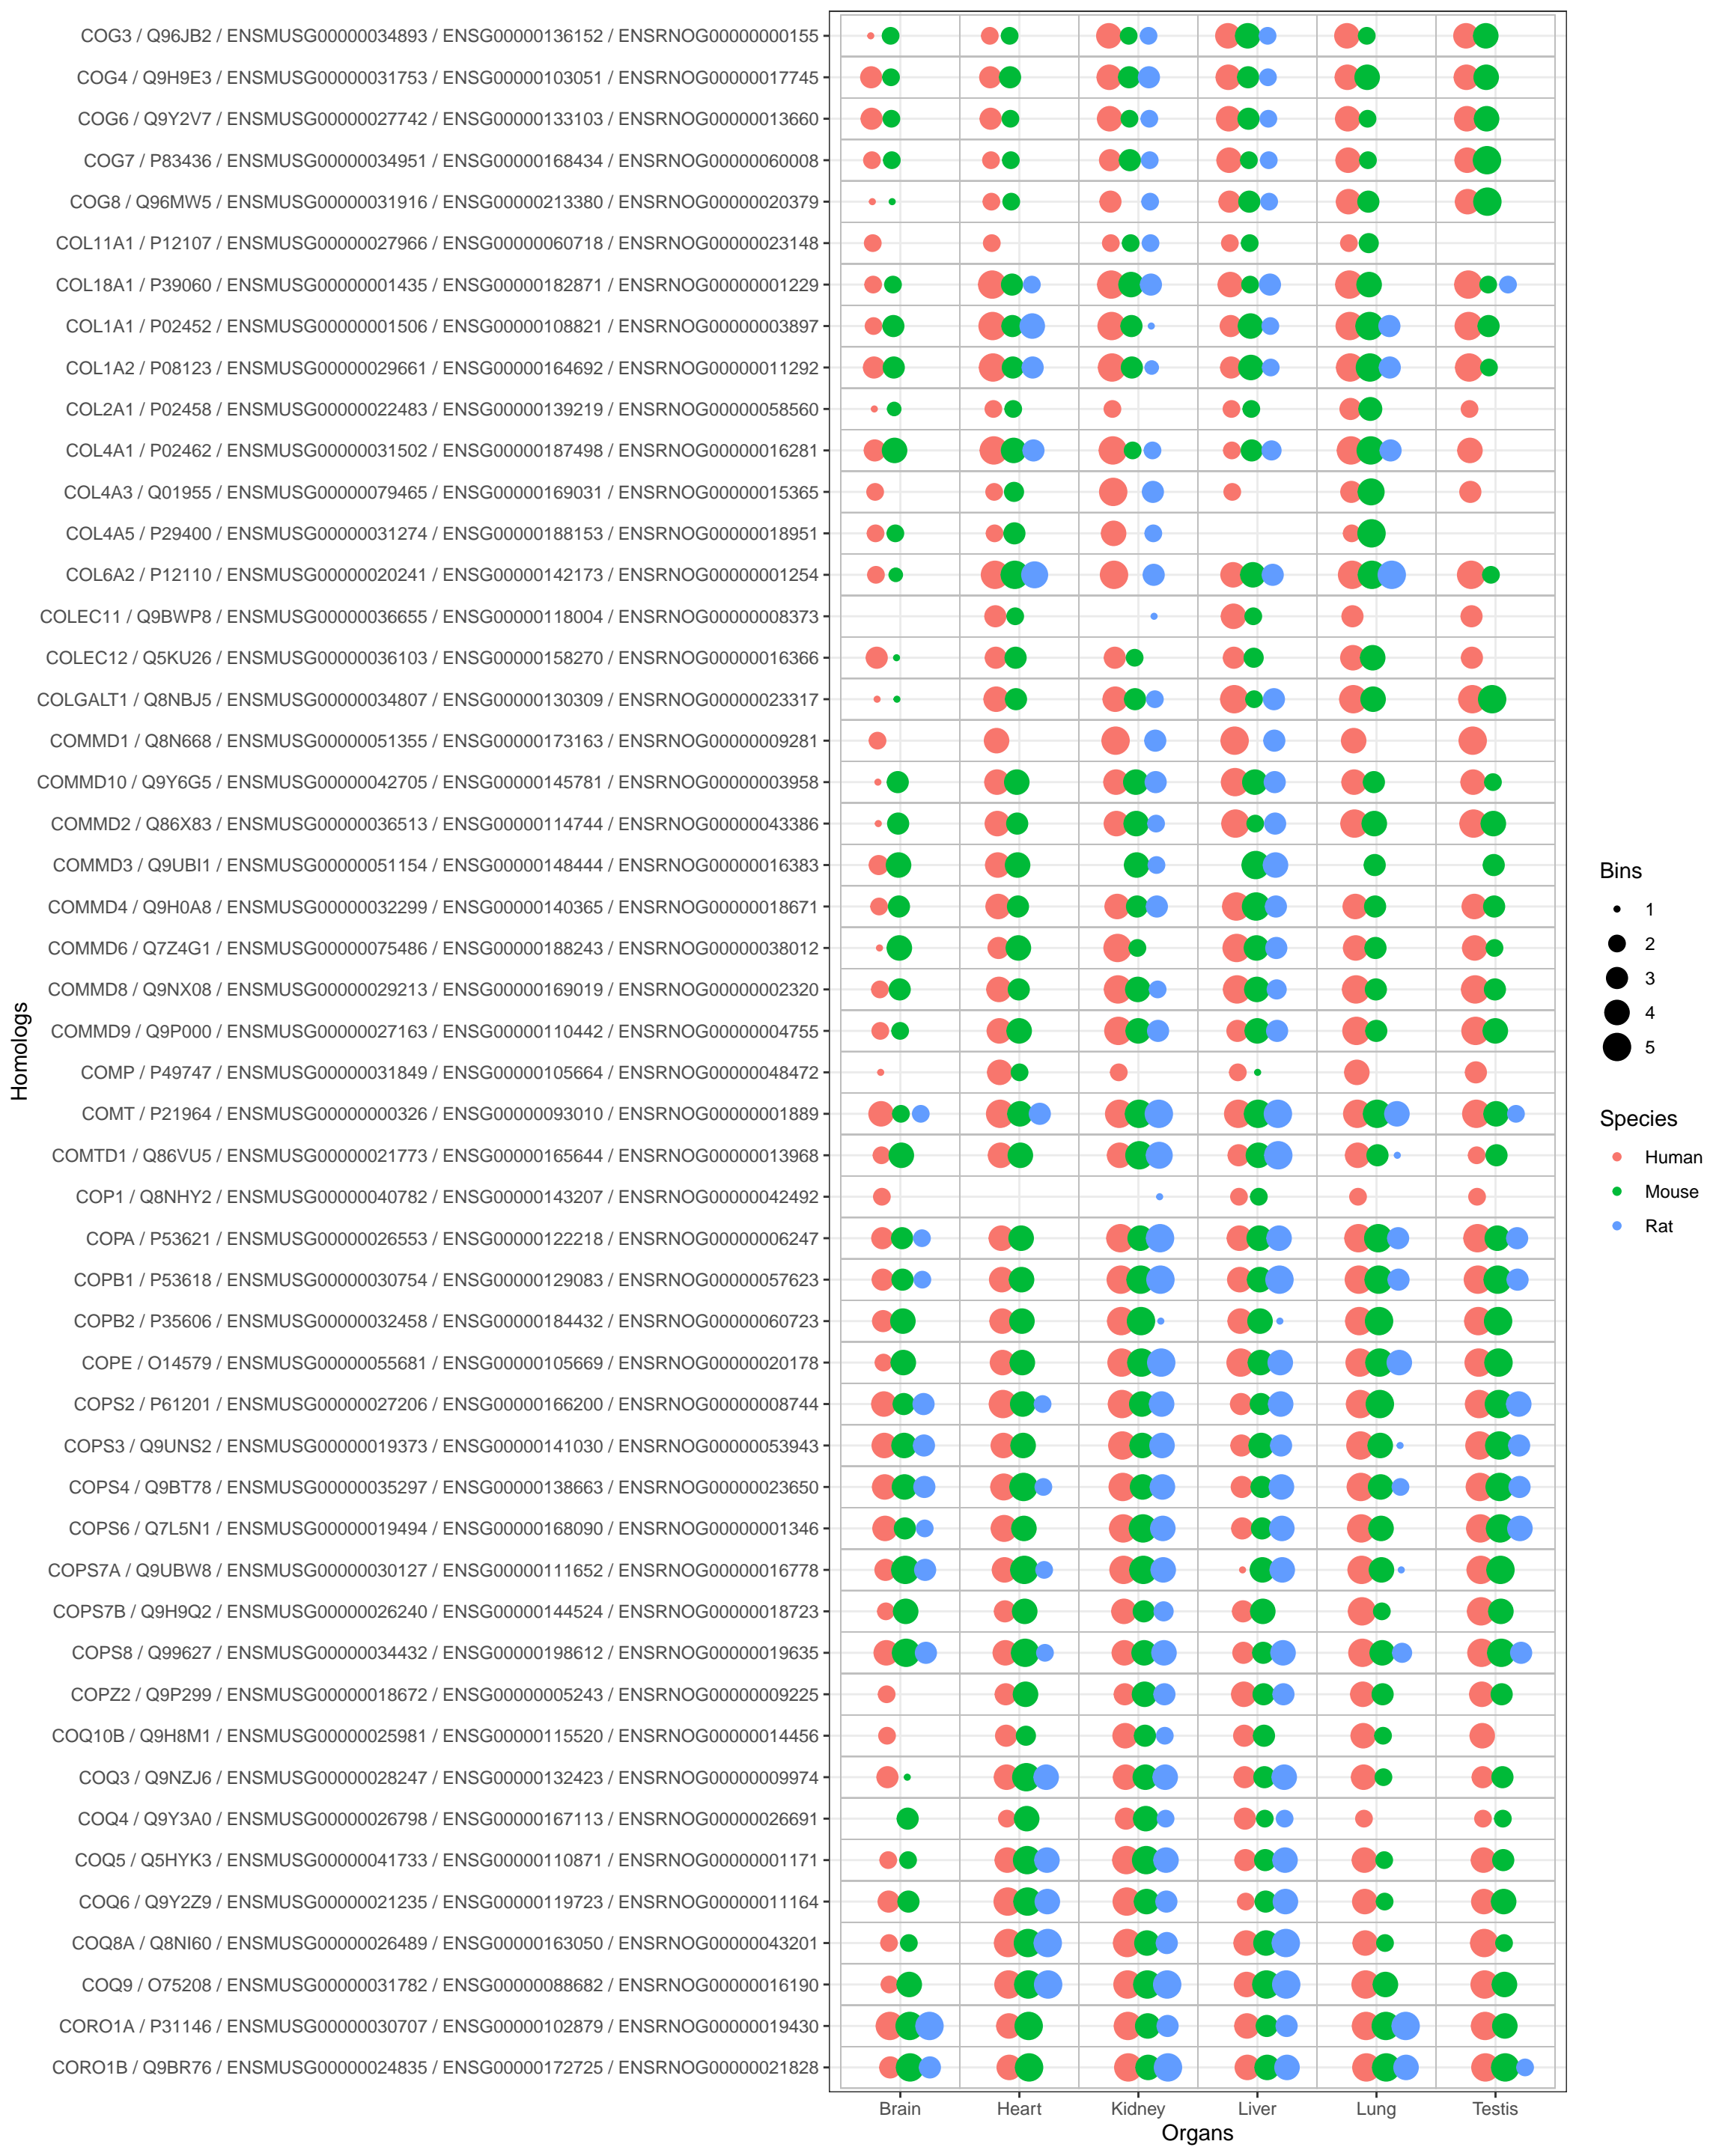

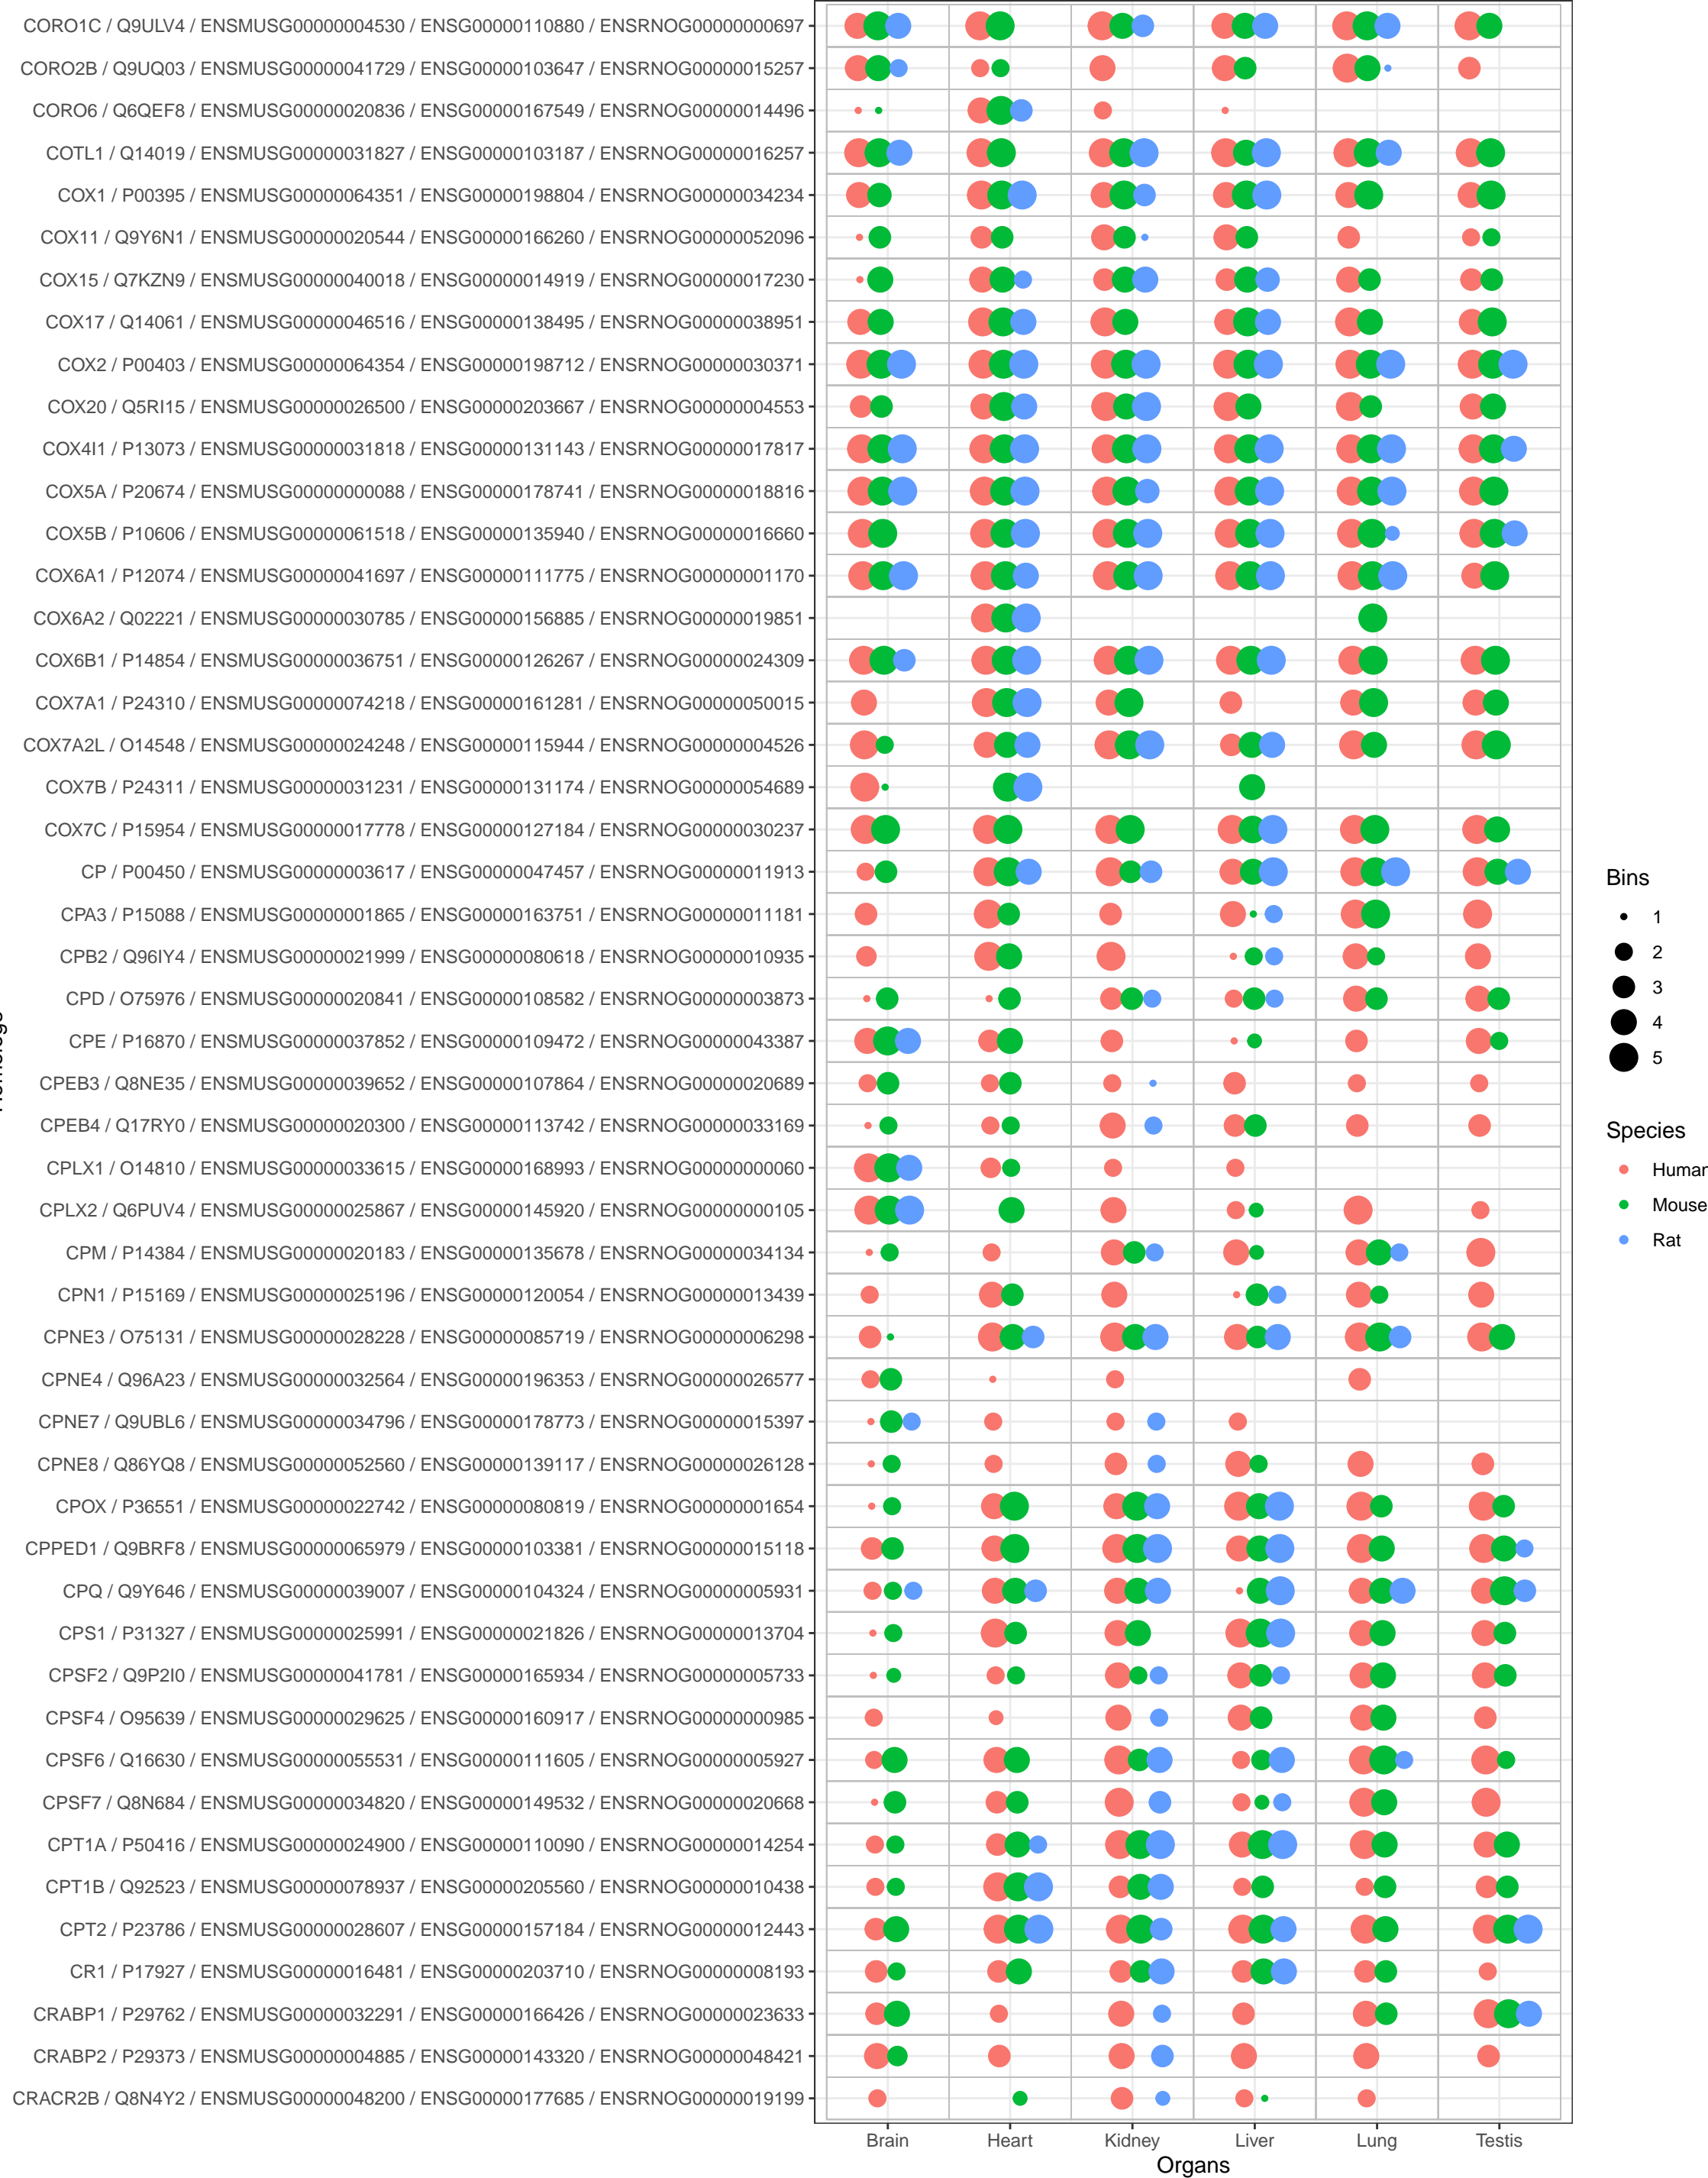

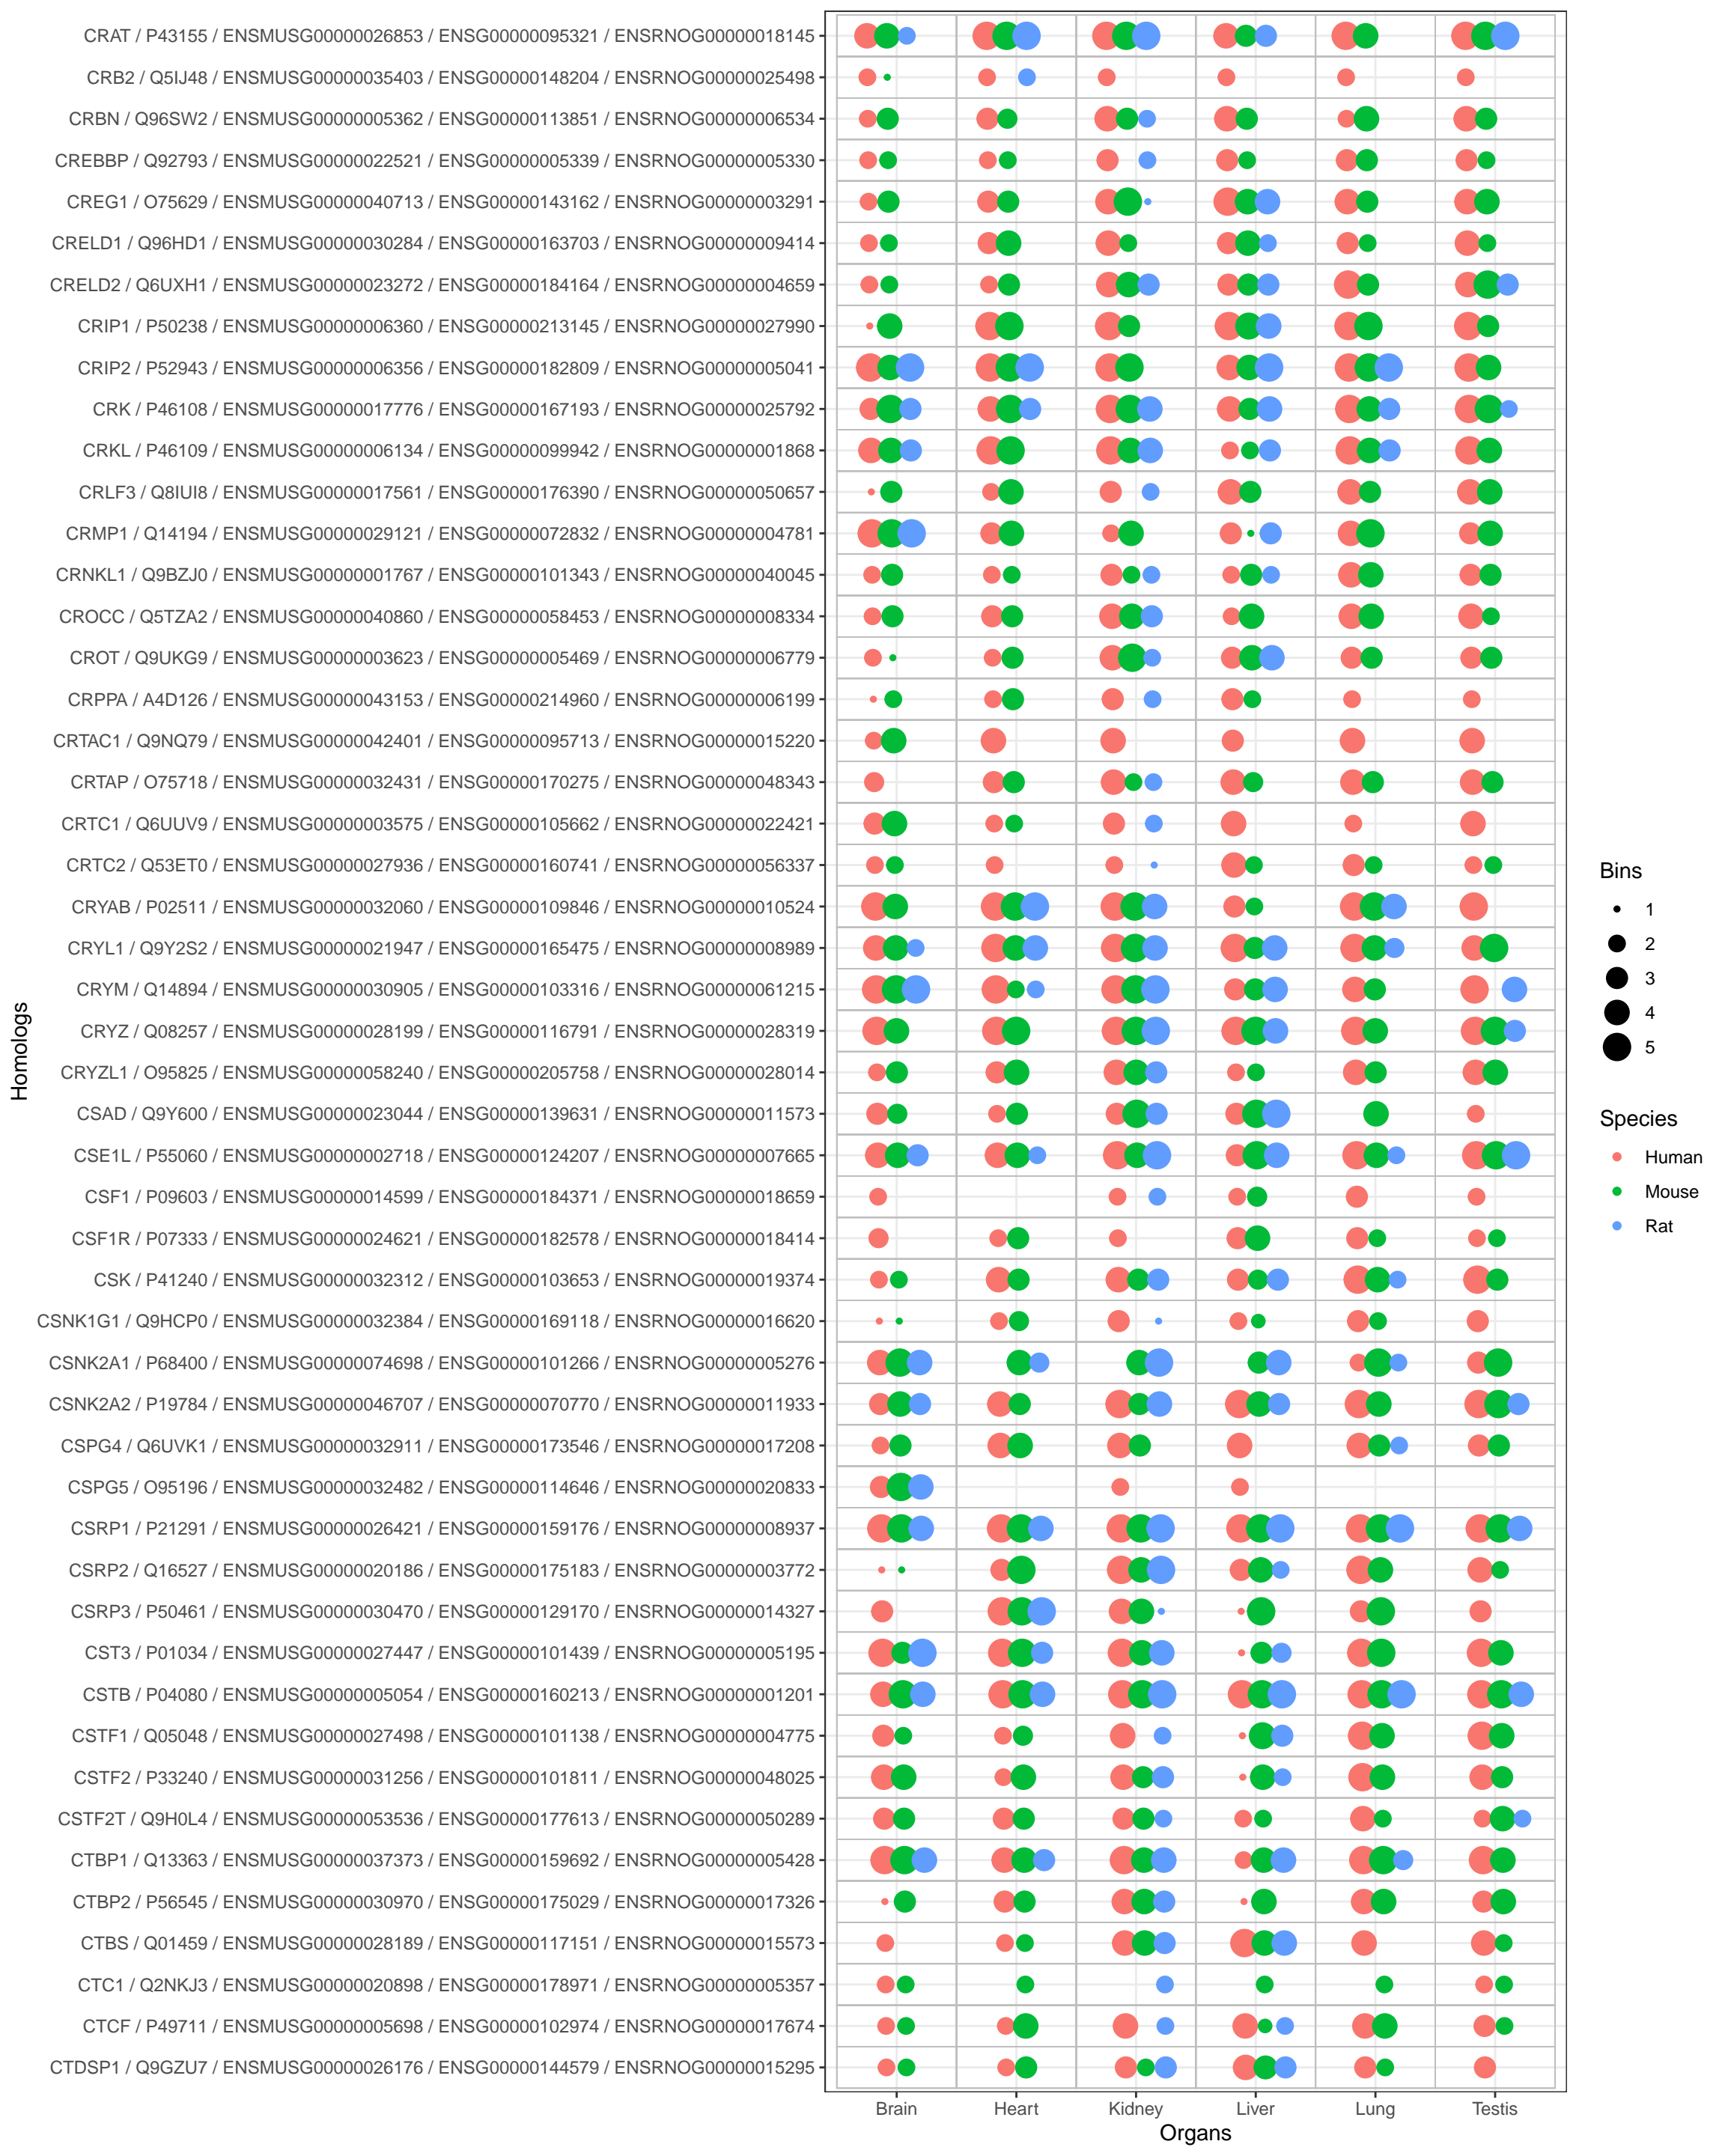



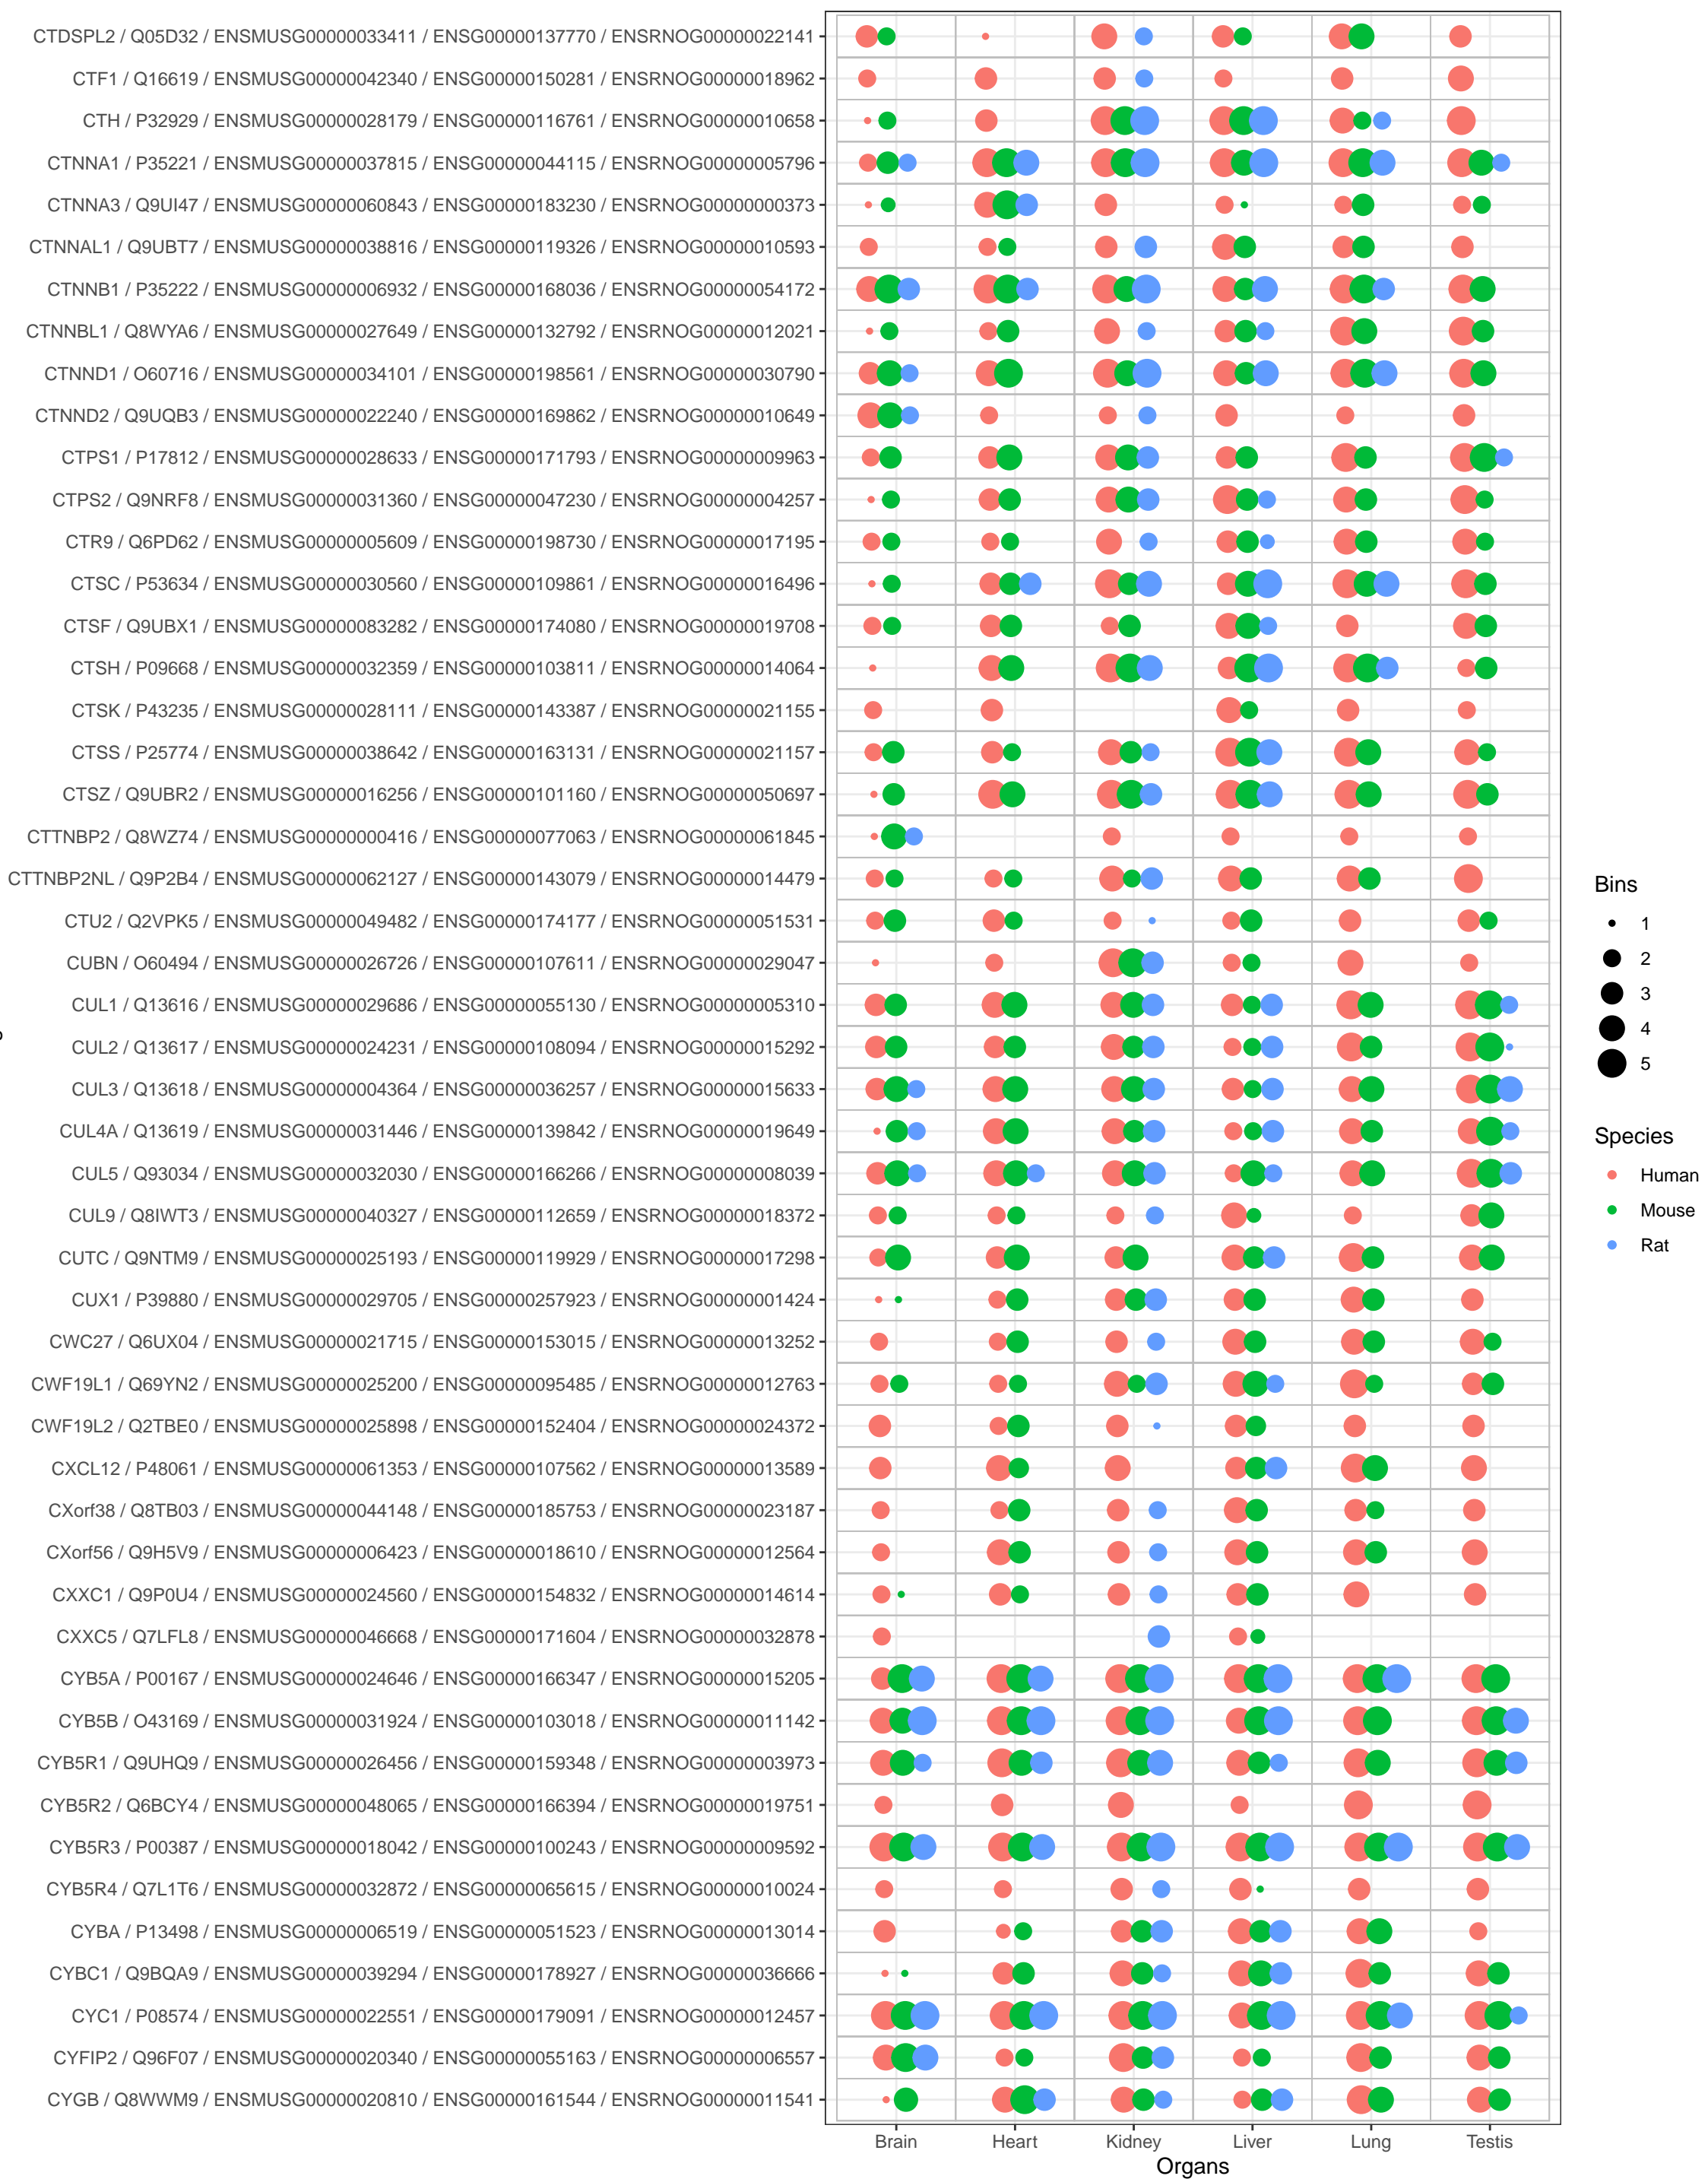



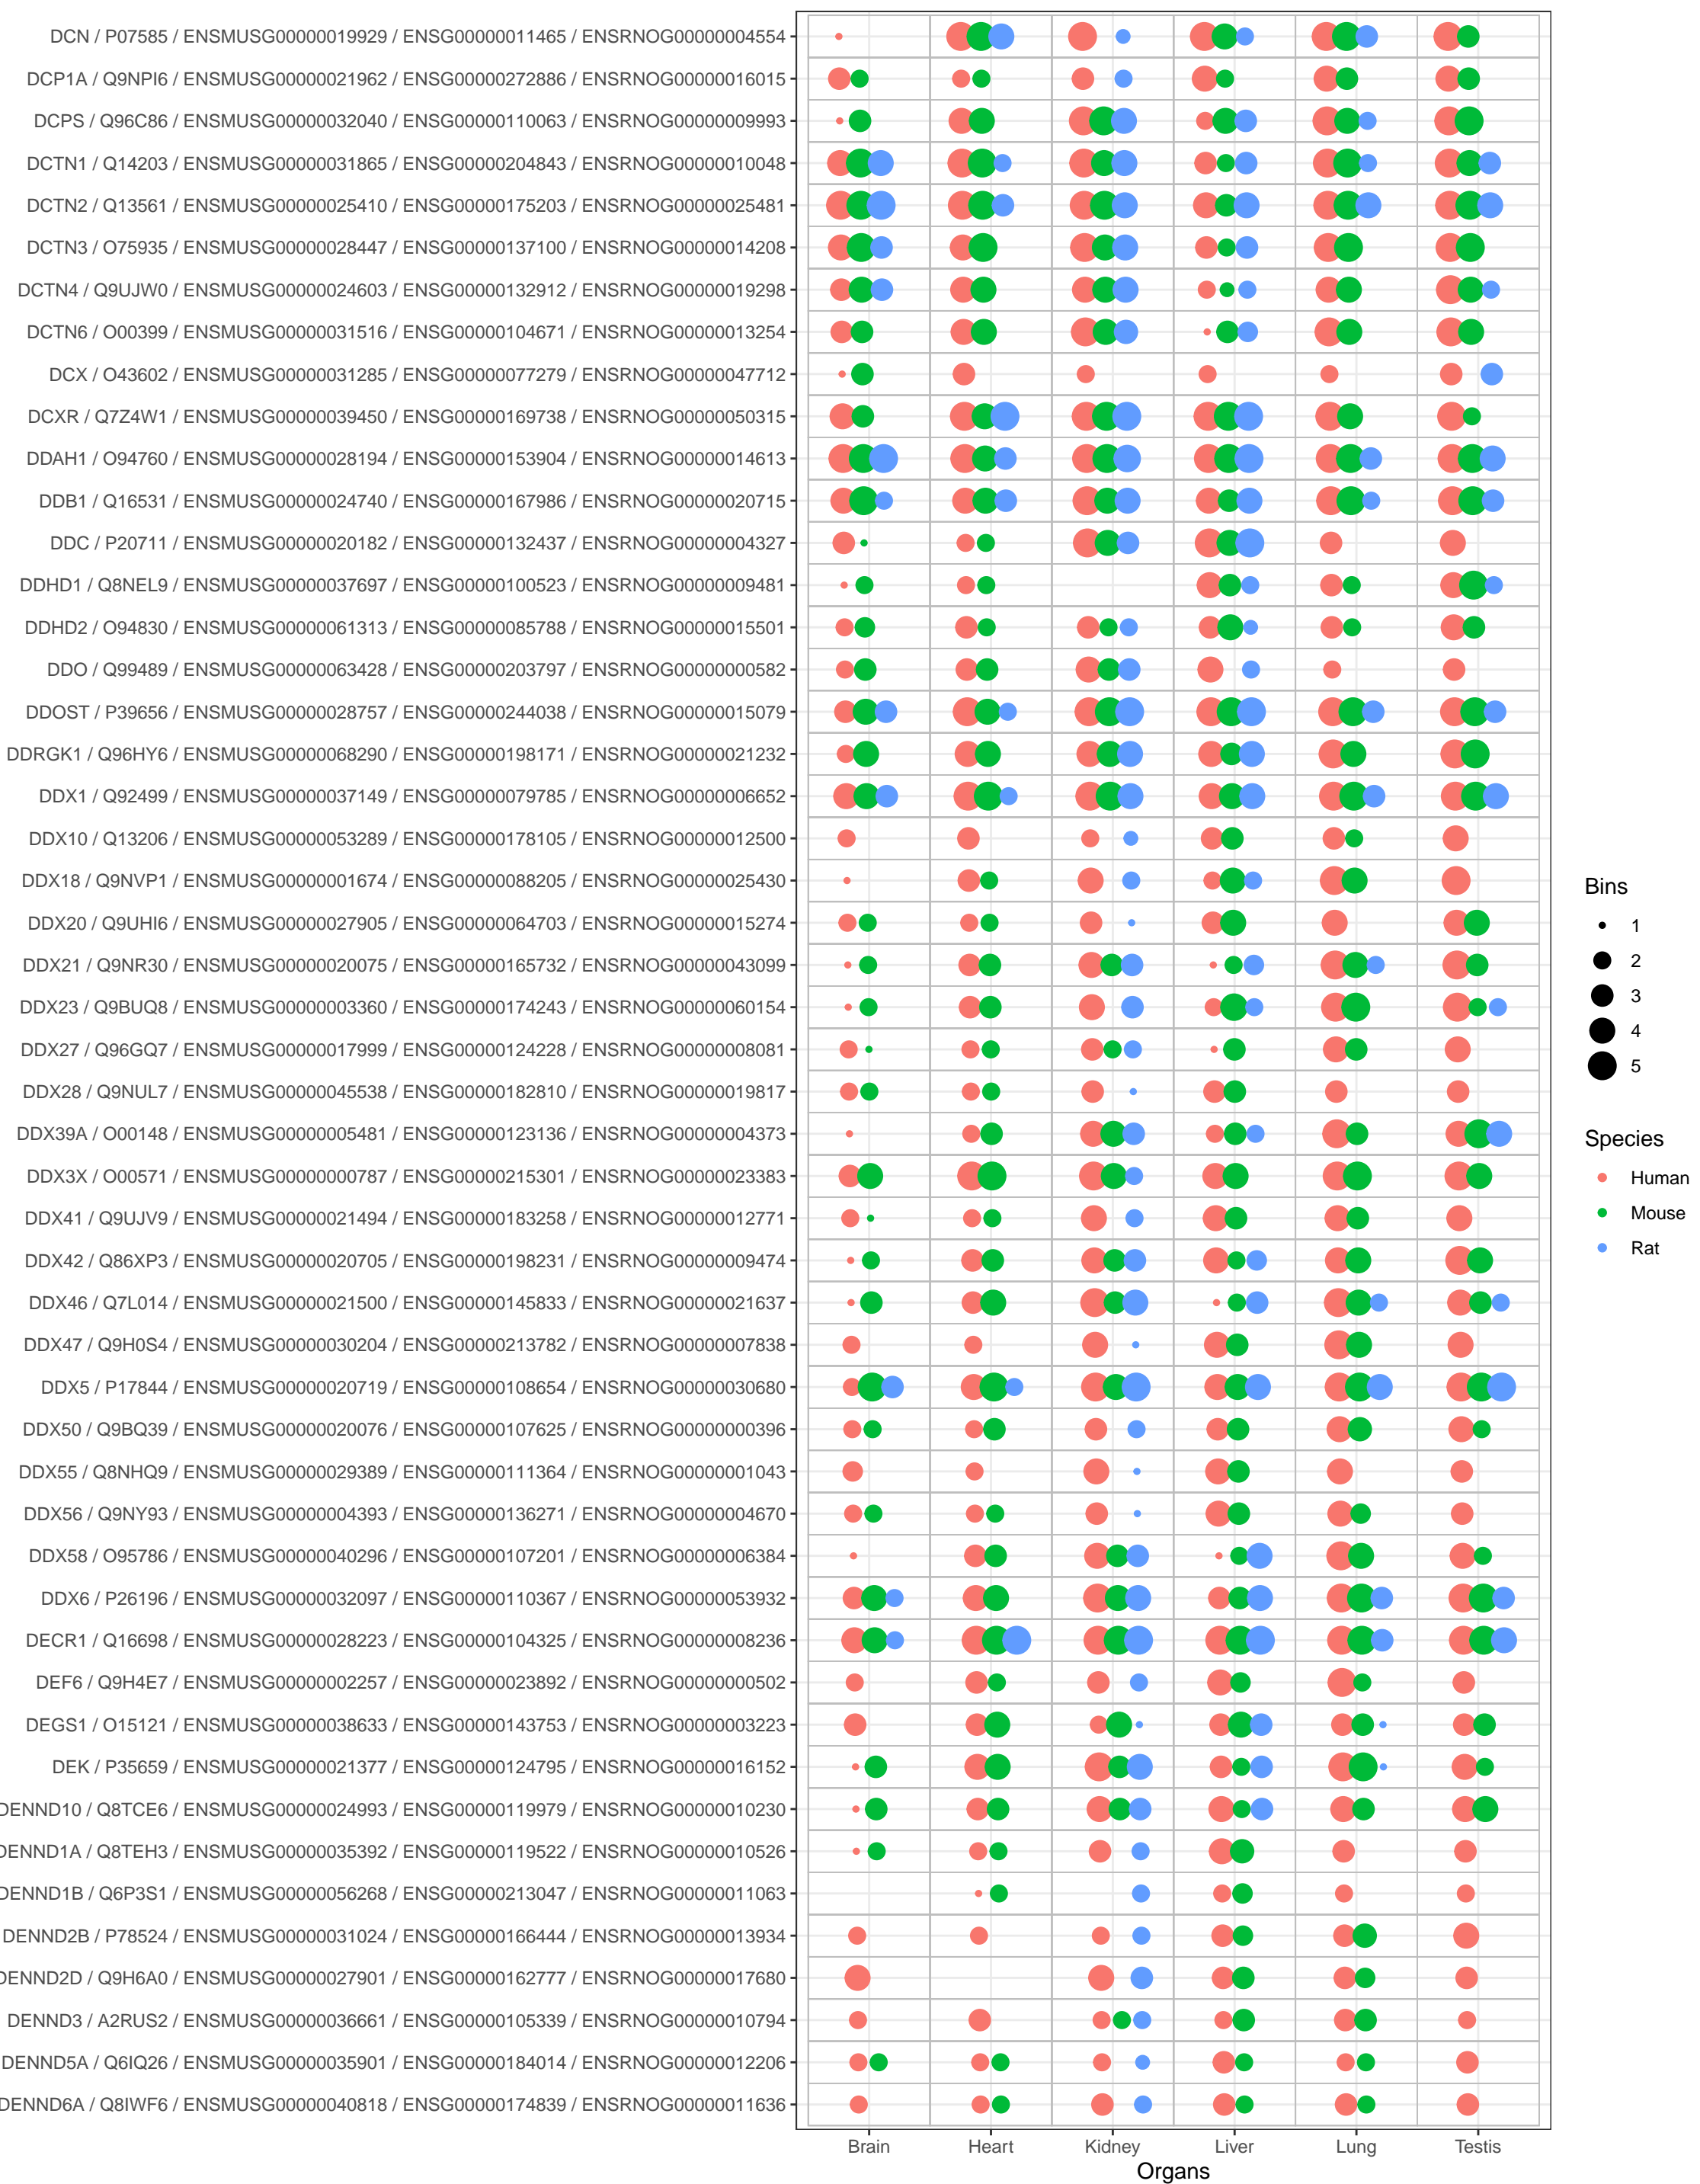

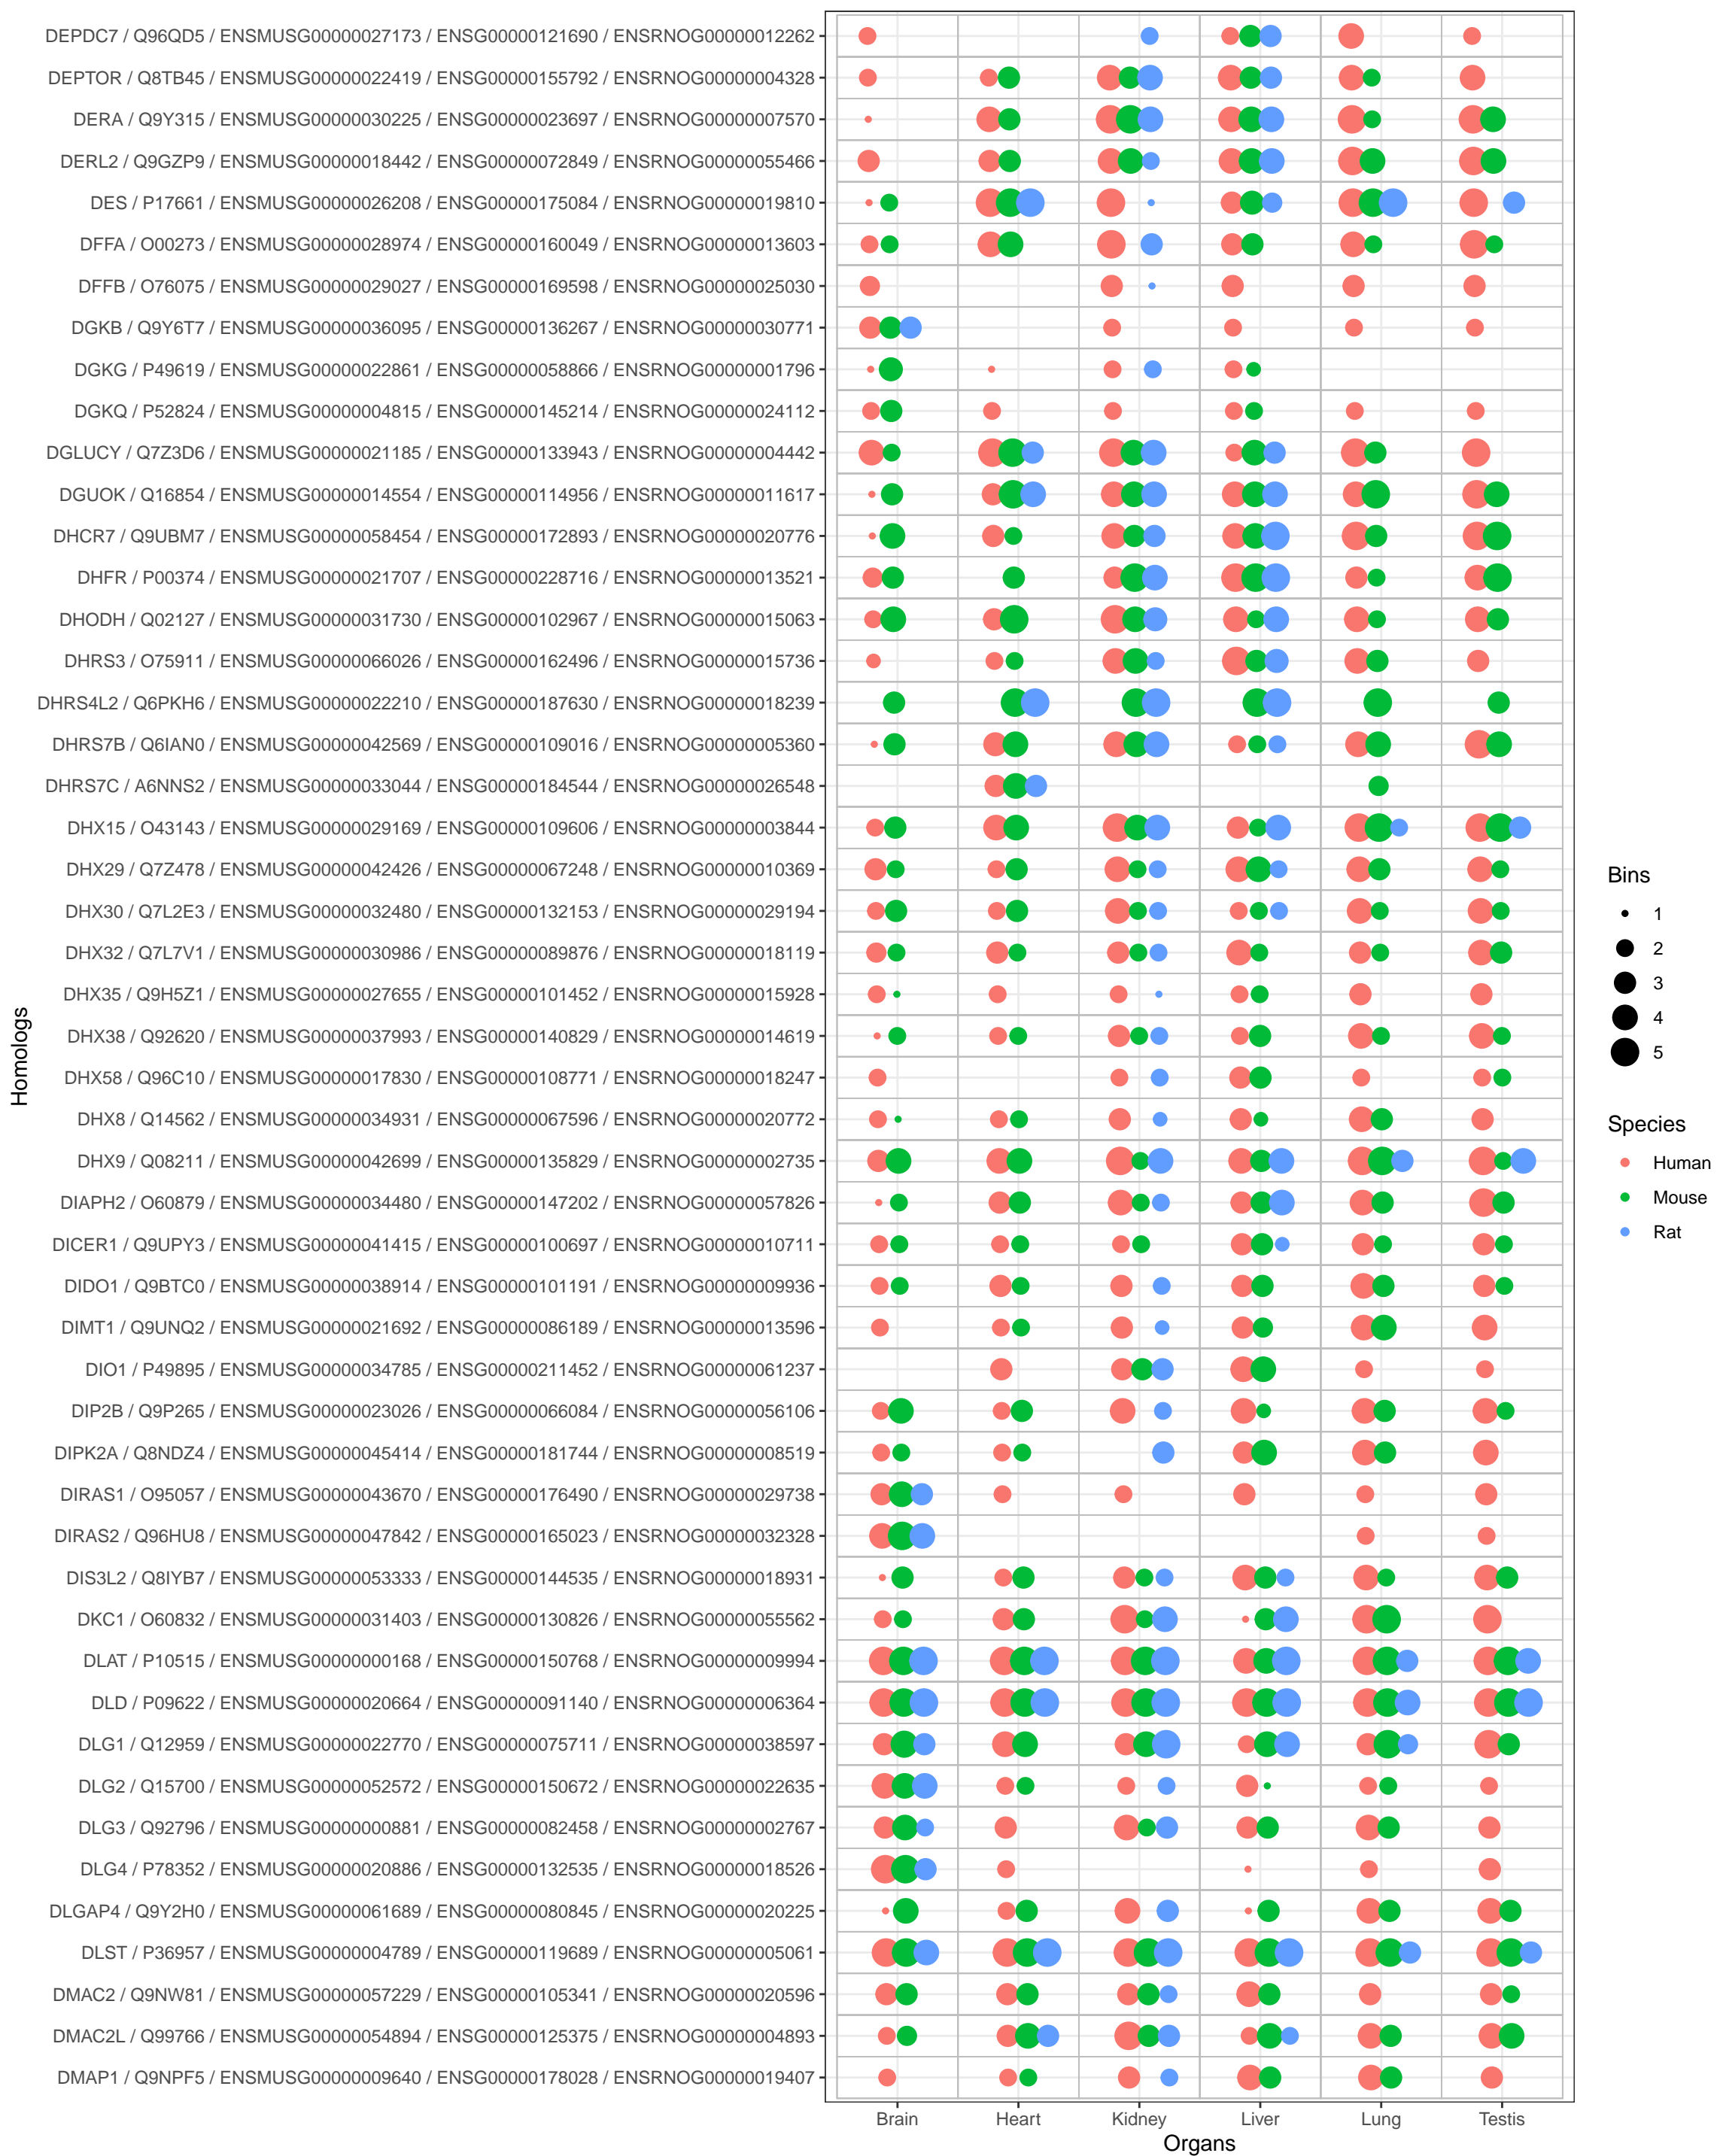

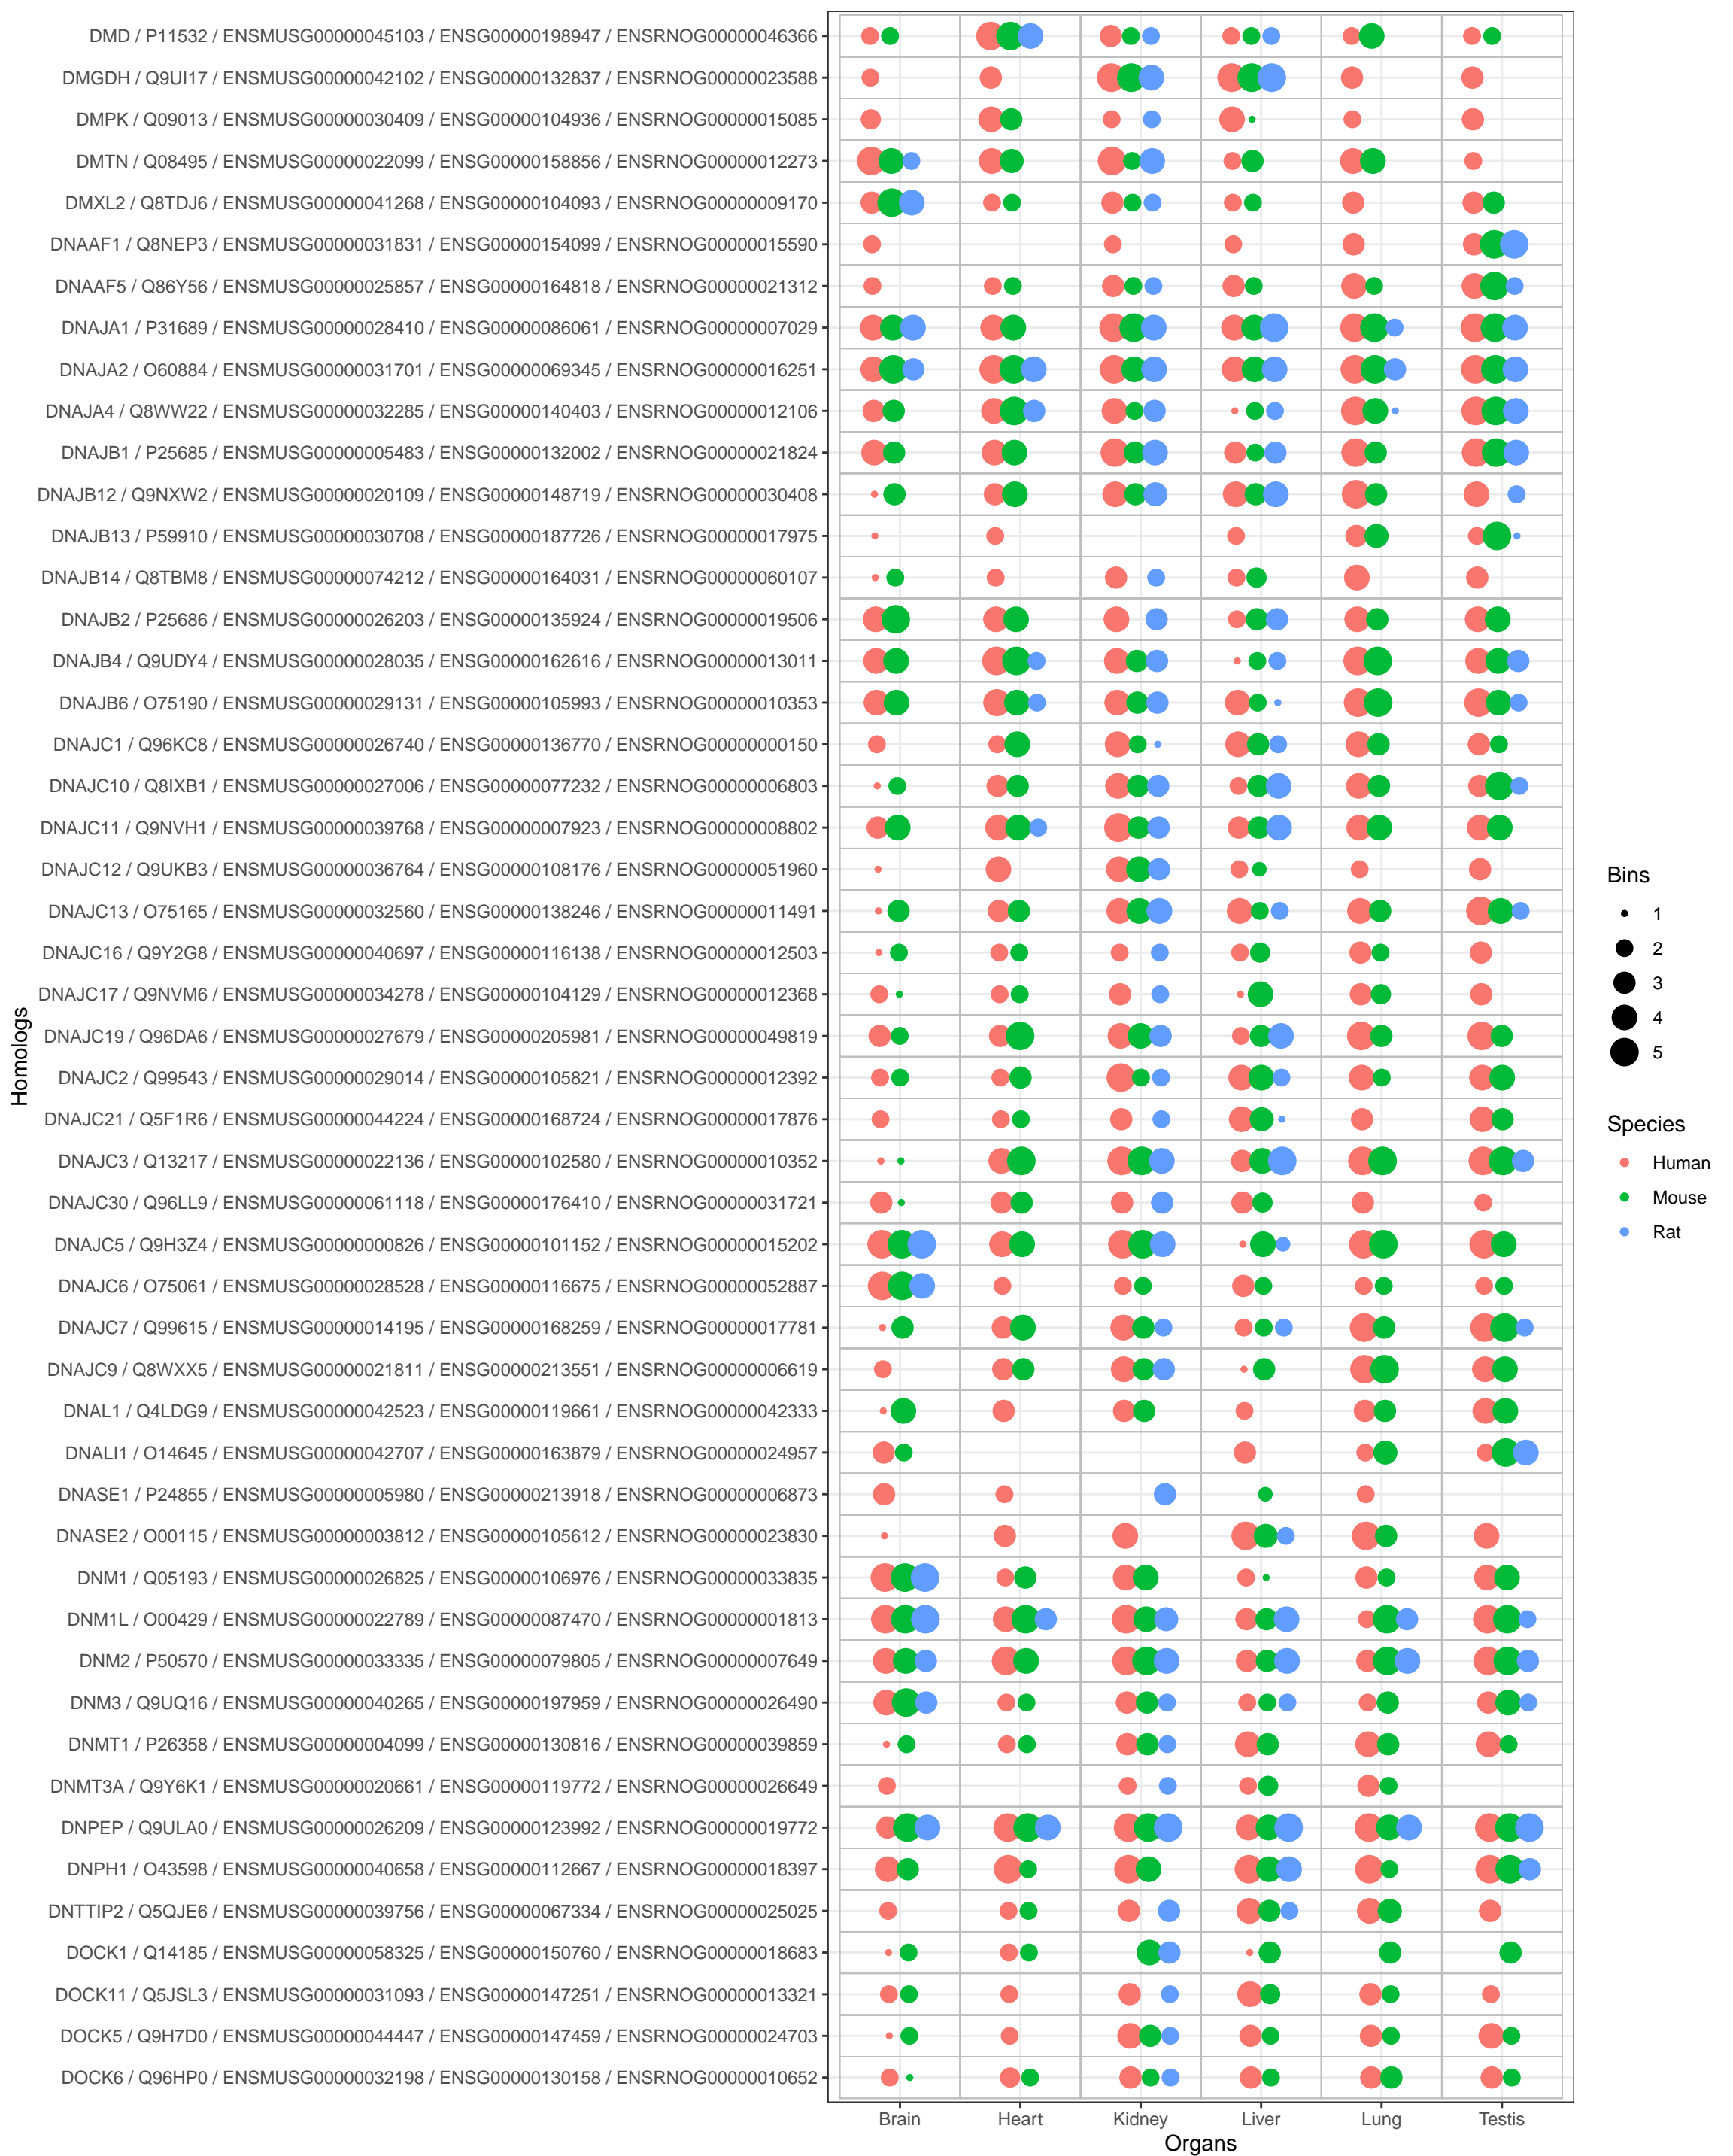

DOCK8 / Q8NF50 / ENSMUSG00000052085 / ENSG00000107099 / ENSRNOG00000015894  
DOCK9 / Q9BZ29 / ENSMUSG00000025558 / ENSG00000088387 / ENSRNOG00000011969  
DOHH / Q9BU89 / ENSMUSG00000078440 / ENSG00000129932 / ENSRNOG00000004259  
DOK1 / Q99704 / ENSMUSG00000068335 / ENSG00000115325 / ENSRNOG00000007412  
DPCD / Q9BVM2 / ENSMUSG00000041035 / ENSG00000166171 / ENSRNOG00000017241  
DPEP1 / P16444 / ENSMUSG00000019278 / ENSG00000015413 / ENSRNOG00000015880  
DPEP3 / Q9H4B8 / ENSMUSG00000031898 / ENSG00000141096 / ENSRNOG00000019757  
DPF2 / Q92785 / ENSMUSG00000024826 / ENSG00000133884 / ENSRNOG00000020892  
DPH1 / Q9BZG8 / ENSMUSG00000078789 / ENSG00000108963 / ENSRNOG00000003116  
DPH2 / Q9BQC3 / ENSMUSG00000028540 / ENSG00000132768 / ENSRNOG00000019735  
DPH5 / Q9H2P9 / ENSMUSG00000033554 / ENSG00000117543 / ENSRNOG00000013719  
DPH6 / Q7L8W6 / ENSMUSG00000057147 / ENSG00000134146 / ENSRNOG00000037356  
DPM1 / O60762 / ENSMUSG00000078919 / ENSG00000000419 / ENSRNOG00000010993  
DPM3 / Q9P2X0 / ENSMUSG00000042737 / ENSG00000179085 / ENSRNOG00000029077  
DPP10 / Q8N608 / ENSMUSG00000036815 / ENSG00000175497 / ENSRNOG00000002595  
DPP3 / Q9NY33 / ENSMUSG00000063904 / ENSG00000254986 / ENSRNOG00000031485  
DPP4 / P27487 / ENSMUSG00000035000 / ENSG00000197635 / ENSRNOG00000030763  
DPP6 / P42658 / ENSMUSG00000061576 / ENSG00000130226 / ENSRNOG00000030547  
DPP7 / Q9UHL4 / ENSMUSG00000026958 / ENSG00000176978 / ENSRNOG00000012640  
DPP8 / Q6V1X1 / ENSMUSG00000032393 / ENSG00000074603 / ENSRNOG00000019105  
DPP9 / Q86TI2 / ENSMUSG00000001229 / ENSG00000142002 / ENSRNOG00000050748  
DPT / Q07507 / ENSMUSG00000026574 / ENSG00000143196 / ENSRNOG00000002947  
DPY19L1 / Q2PZI1 / ENSMUSG00000043067 / ENSG00000173852 / ENSRNOG00000026589  
DPY19L2 / Q6NUT2 / ENSMUSG00000085576 / ENSG00000177990 / ENSRNOG00000044585  
DPY19L3 / Q6ZPD9 / ENSMUSG00000043671 / ENSG00000178904 / ENSRNOG00000021573  
DPY30 / Q9C005 / ENSMUSG00000024067 / ENSG00000162961 / ENSRNOG00000027126  
DPYD / Q12882 / ENSMUSG00000033308 / ENSG00000188641 / ENSRNOG00000017105  
DPYS / Q14117 / ENSMUSG00000022304 / ENSG00000147647 / ENSRNOG00000004298  
DPYSL2 / Q16555 / ENSMUSG00000022048 / ENSG00000092964 / ENSRNOG00000009625  
DPYSL3 / Q14195 / ENSMUSG00000024501 / ENSG00000113657 / ENSRNOG00000018992  
DPYSL4 / O14531 / ENSMUSG00000025478 / ENSG00000151640 / ENSRNOG00000027582  
DPYSL5 / Q9BPU6 / ENSMUSG00000029168 / ENSG00000157851 / ENSRNOG00000008996  
DR1 / Q01658 / ENSMUSG00000029265 / ENSG00000117505 / ENSRNOG000000448308  
DRAP1 / Q14919 / ENSMUSG00000024914 / ENSG00000175550 / ENSRNOG00000020527  
DRG1 / Q9Y295 / ENSMUSG00000020457 / ENSG00000185721 / ENSRNOG00000018590  
DRP2 / Q13474 / ENSMUSG00000000223 / ENSG00000102385 / ENSRNOG00000026704  
DSP / P15924 / ENSMUSG00000054889 / ENSG00000096696 / ENSRNOG00000013928  
DSTN / P60981 / ENSMUSG00000015932 / ENSG00000125868 / ENSRNOG00000005924  
DTD1 / Q8TEA8 / ENSMUSG00000027430 / ENSG00000125821 / ENSRNOG00000008746  
DTD2 / Q96FN9 / ENSMUSG00000020956 / ENSG00000129480 / ENSRNOG00000006727  
DTX3L / Q8TDB6 / ENSMUSG00000049502 / ENSG00000163840 / ENSRNOG00000023400  
DTYMK / P23919 / ENSMUSG00000026281 / ENSG00000168393 / ENSRNOG00000018904  
DUS2 / Q9NX74 / ENSMUSG00000031901 / ENSG00000167264 / ENSRNOG00000019819  
DUS3L / Q96G46 / ENSMUSG00000007603 / ENSG00000141994 / ENSRNOG00000050381  
DUSP11 / O75319 / ENSMUSG00000030002 / ENSG00000144048 / ENSRNOG00000045539  
DUSP12 / Q9UNI6 / ENSMUSG00000026659 / ENSG00000081721 / ENSRNOG00000003100  
DUSP23 / Q9BVJ7 / ENSMUSG00000026544 / ENSG00000158716 / ENSRNOG00000022143  
DUSP9 / Q99956 / ENSMUSG00000031383 / ENSG00000130829 / ENSRNOG00000055185  
DUT / P33316 / ENSMUSG00000027203 / ENSG00000128951 / ENSRNOG00000007221  
DVL1 / O14640 / ENSMUSG00000029071 / ENSG00000107404 / ENSRNOG00000019423

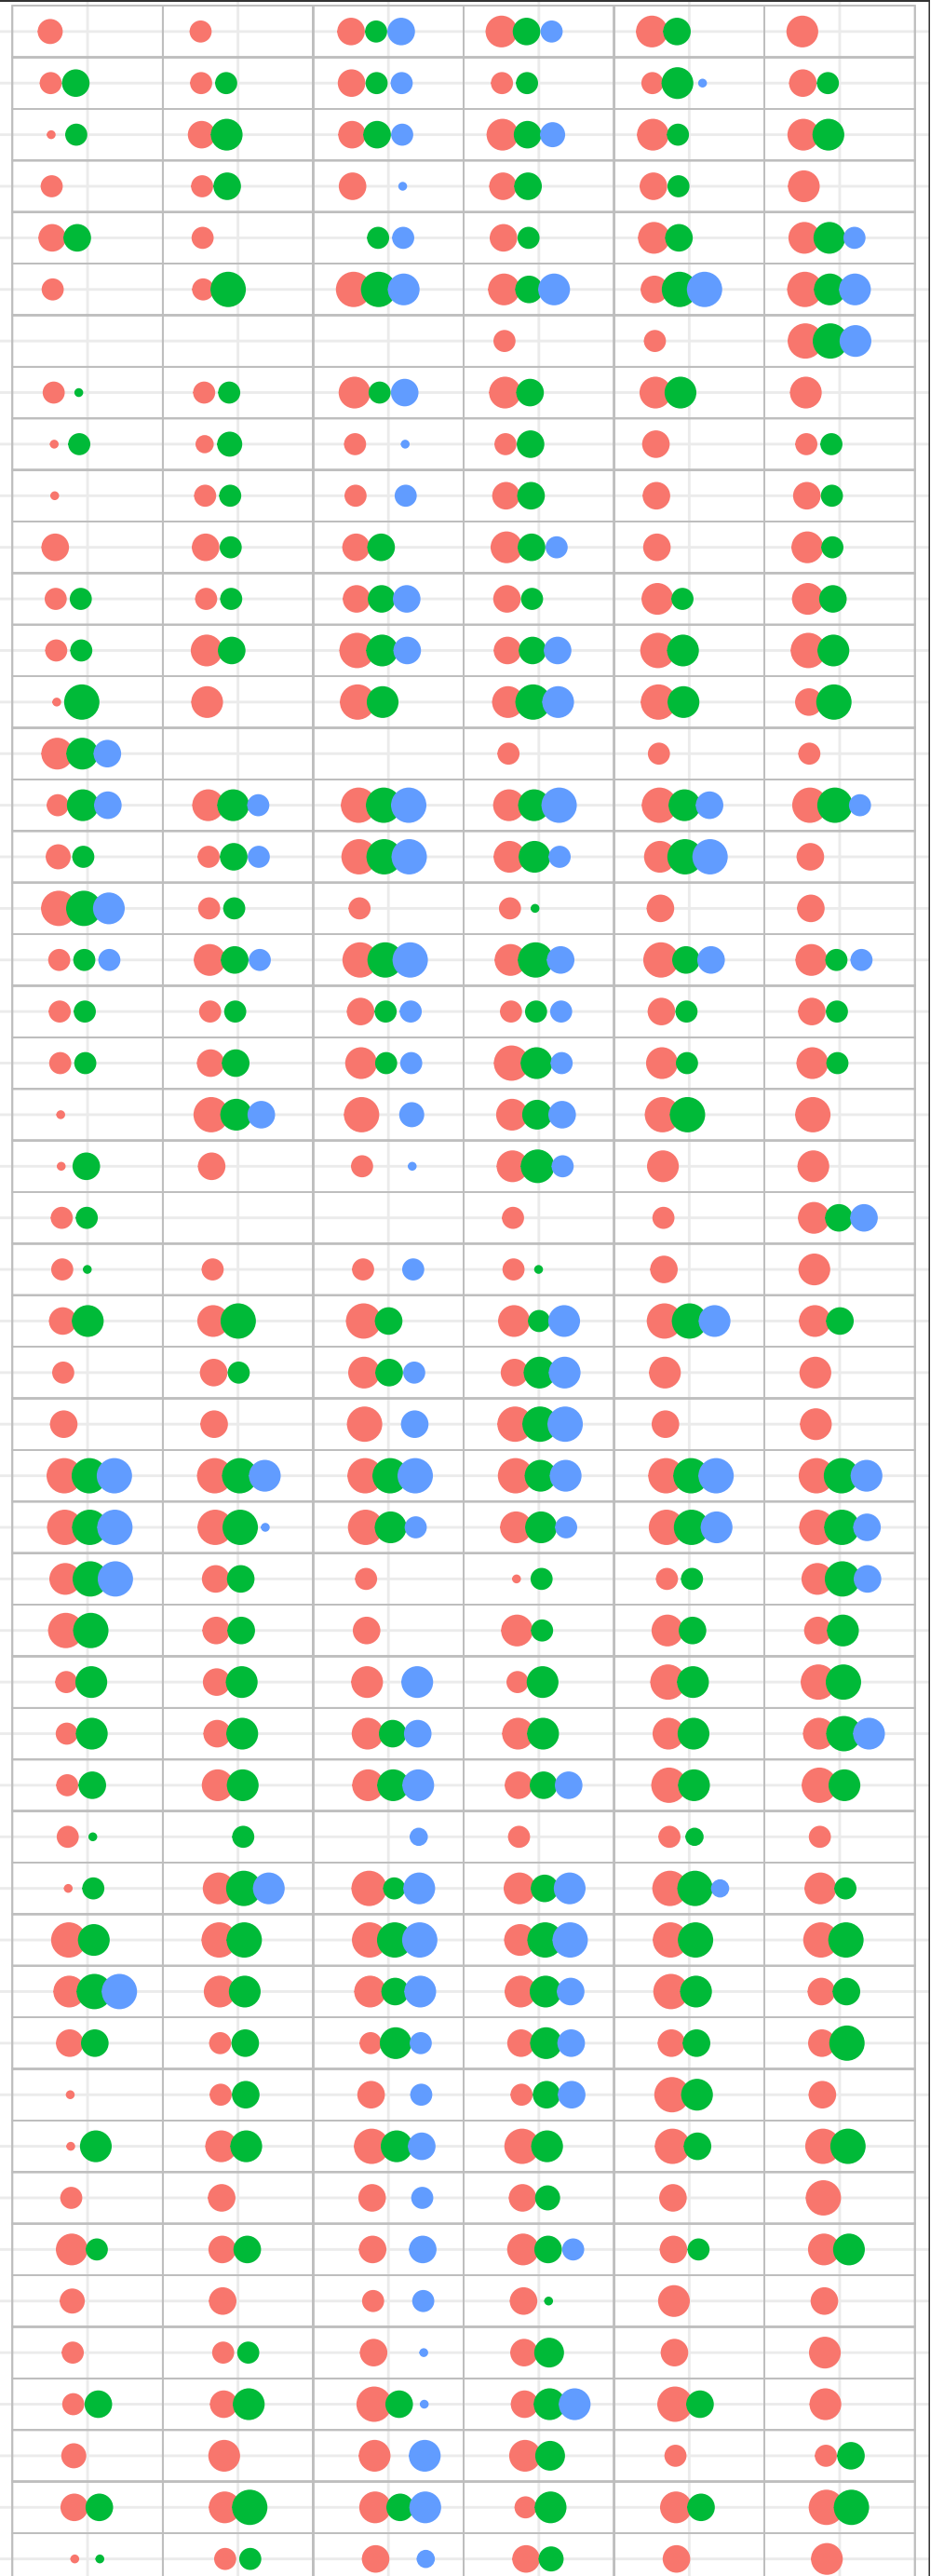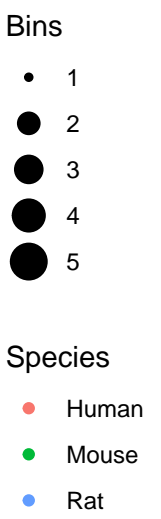

Homologs

Organs

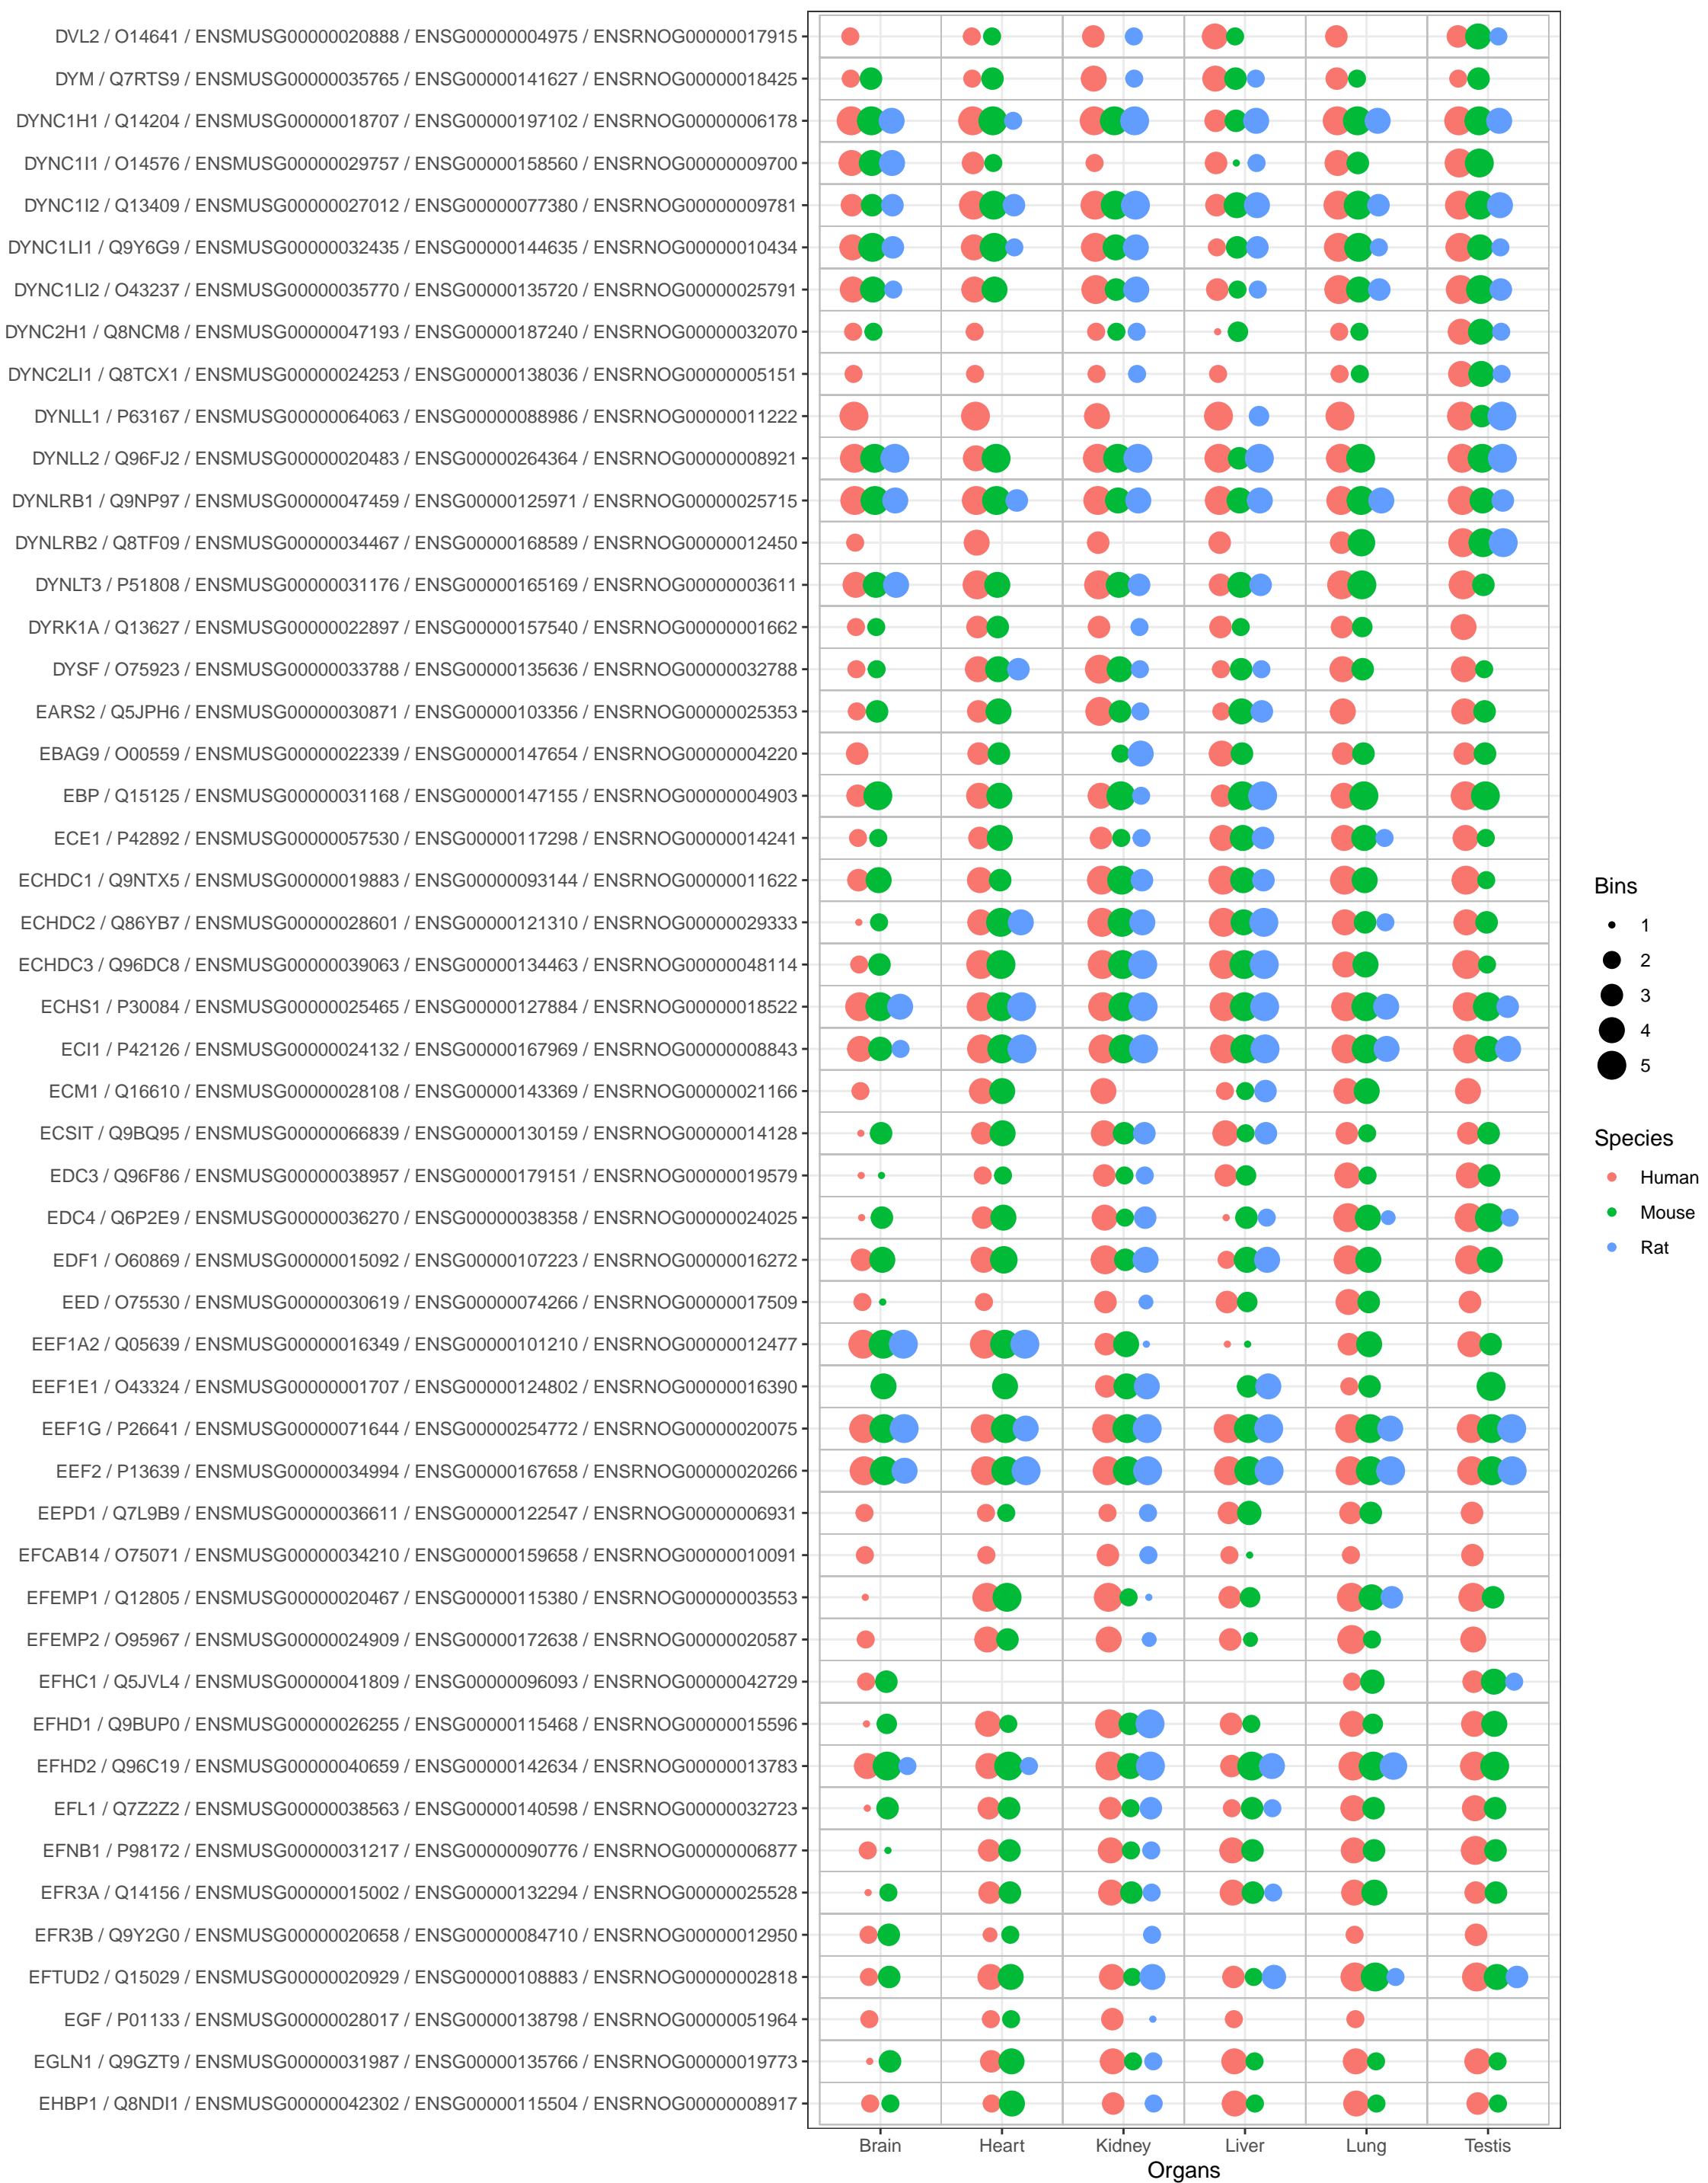

Homologs

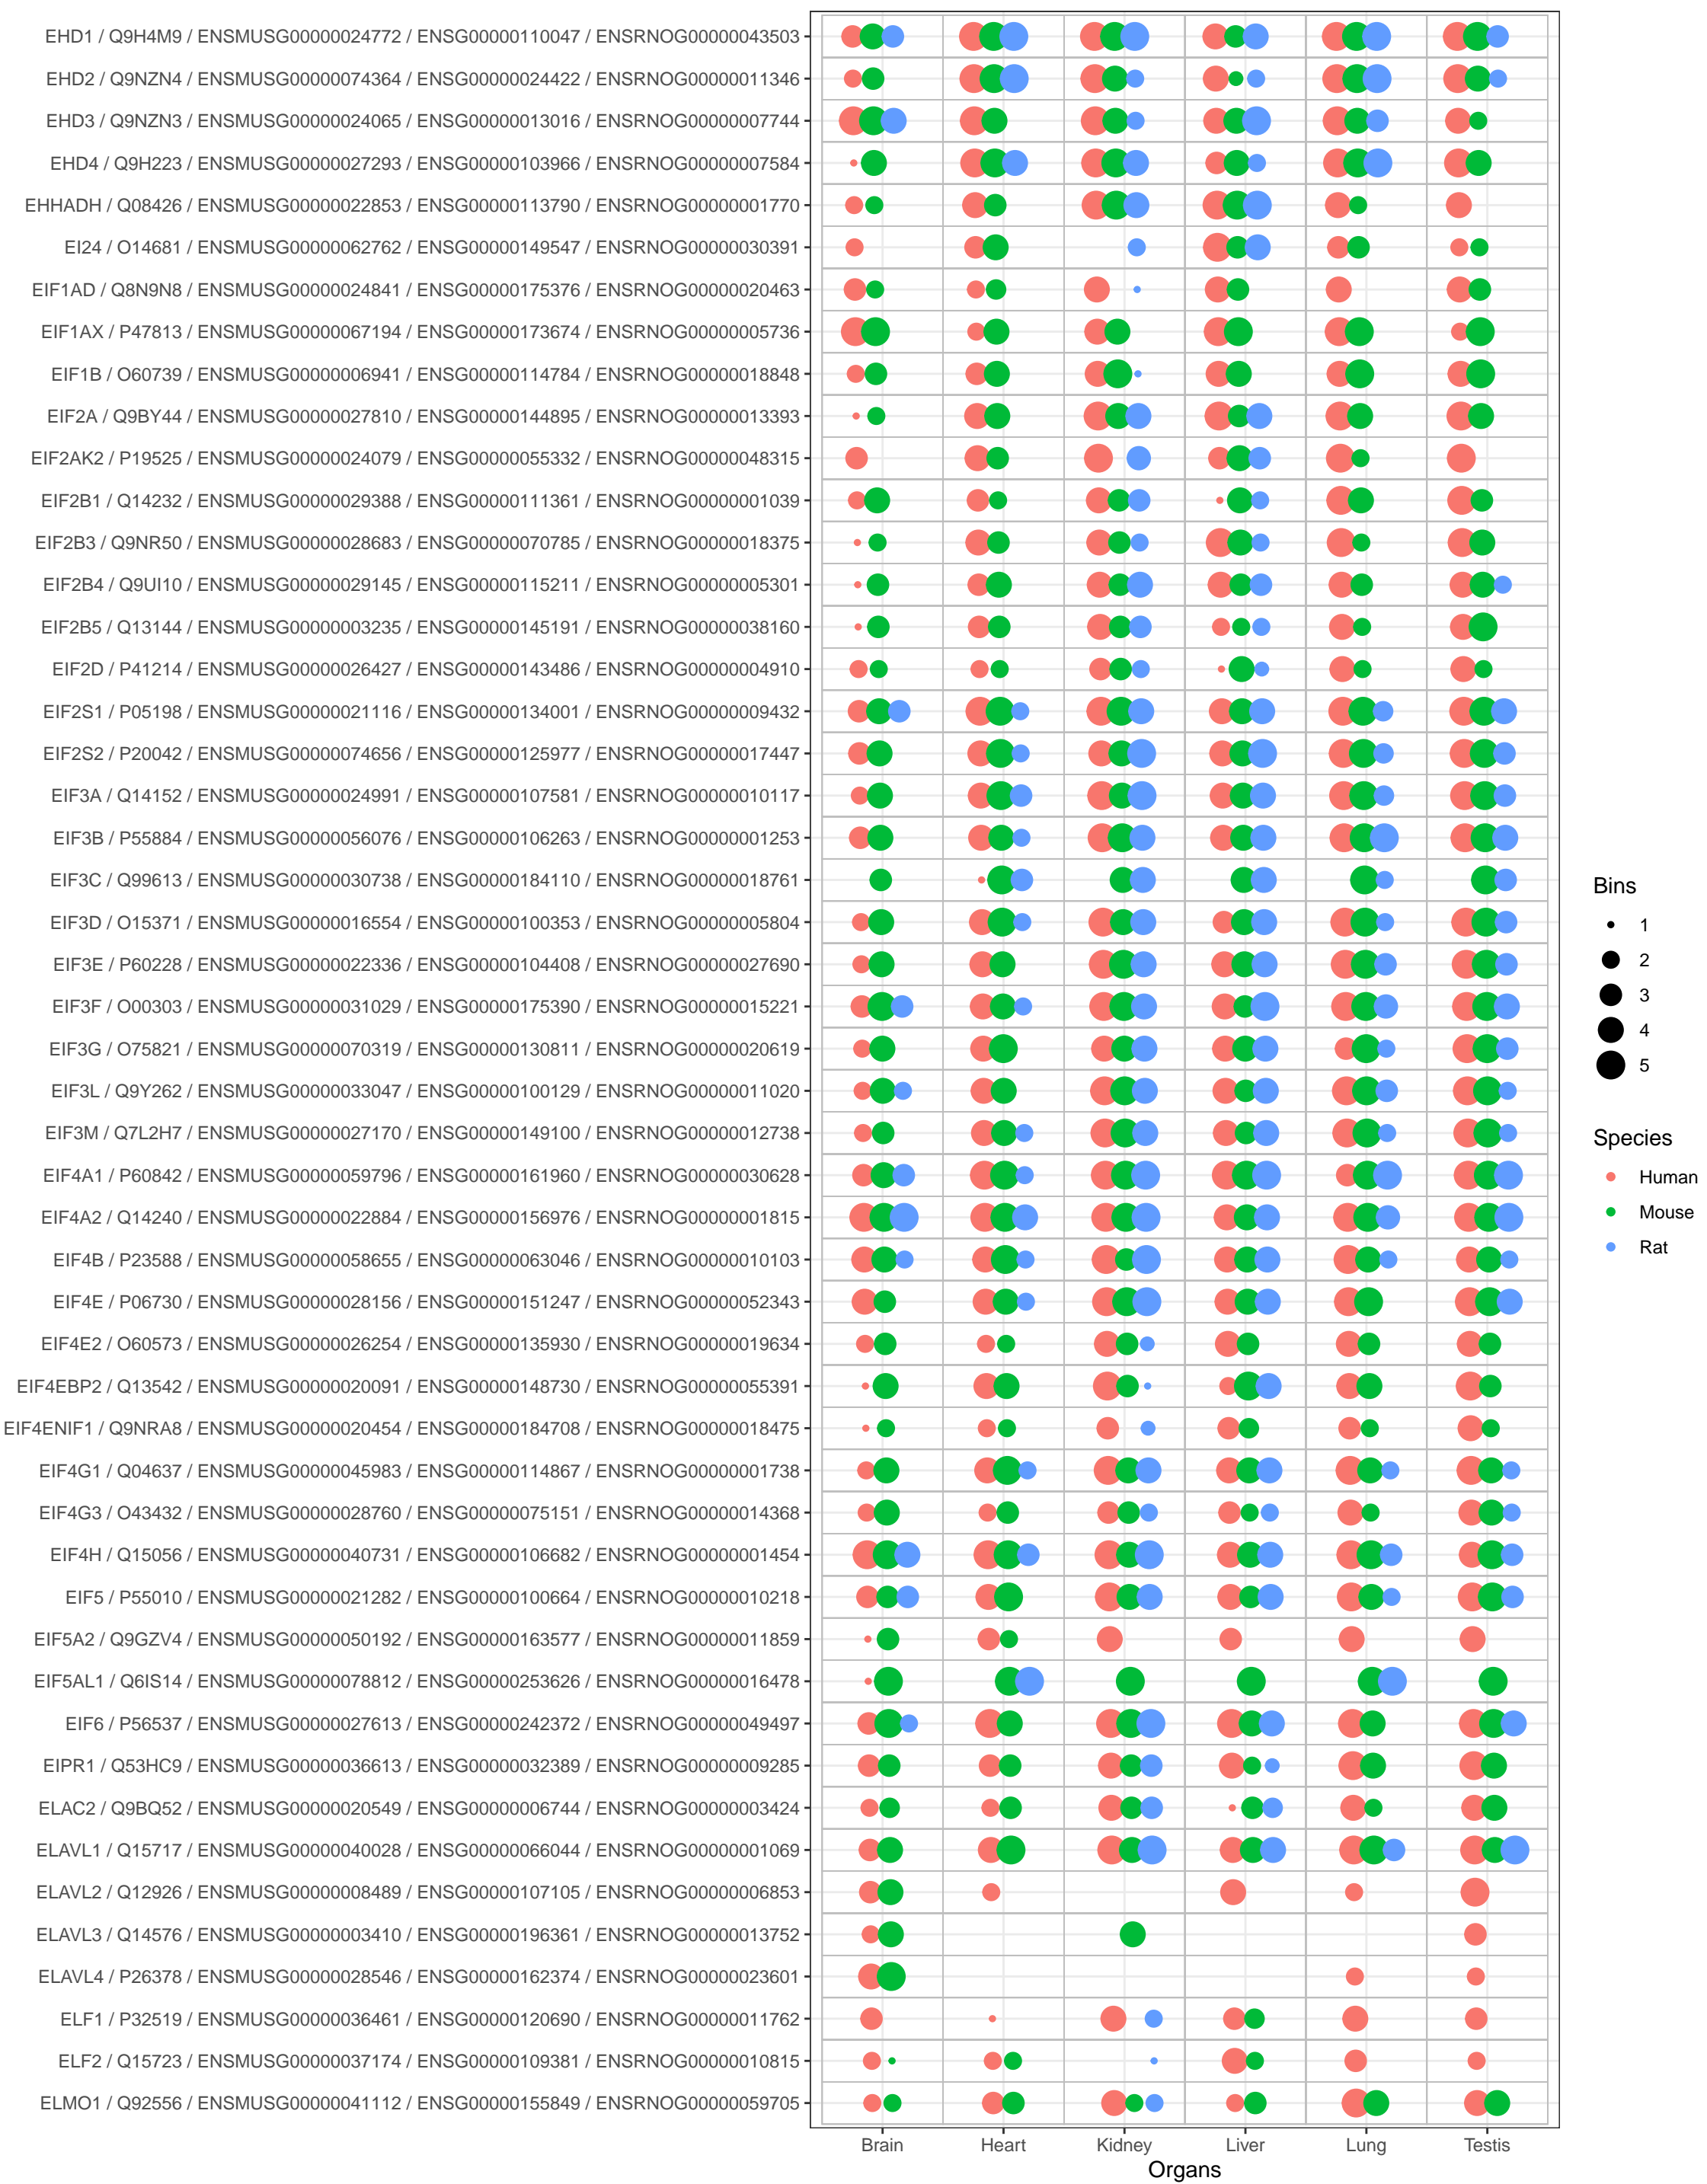

Bins

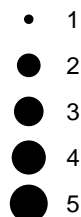

Species

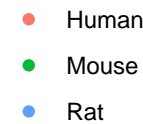

Organs



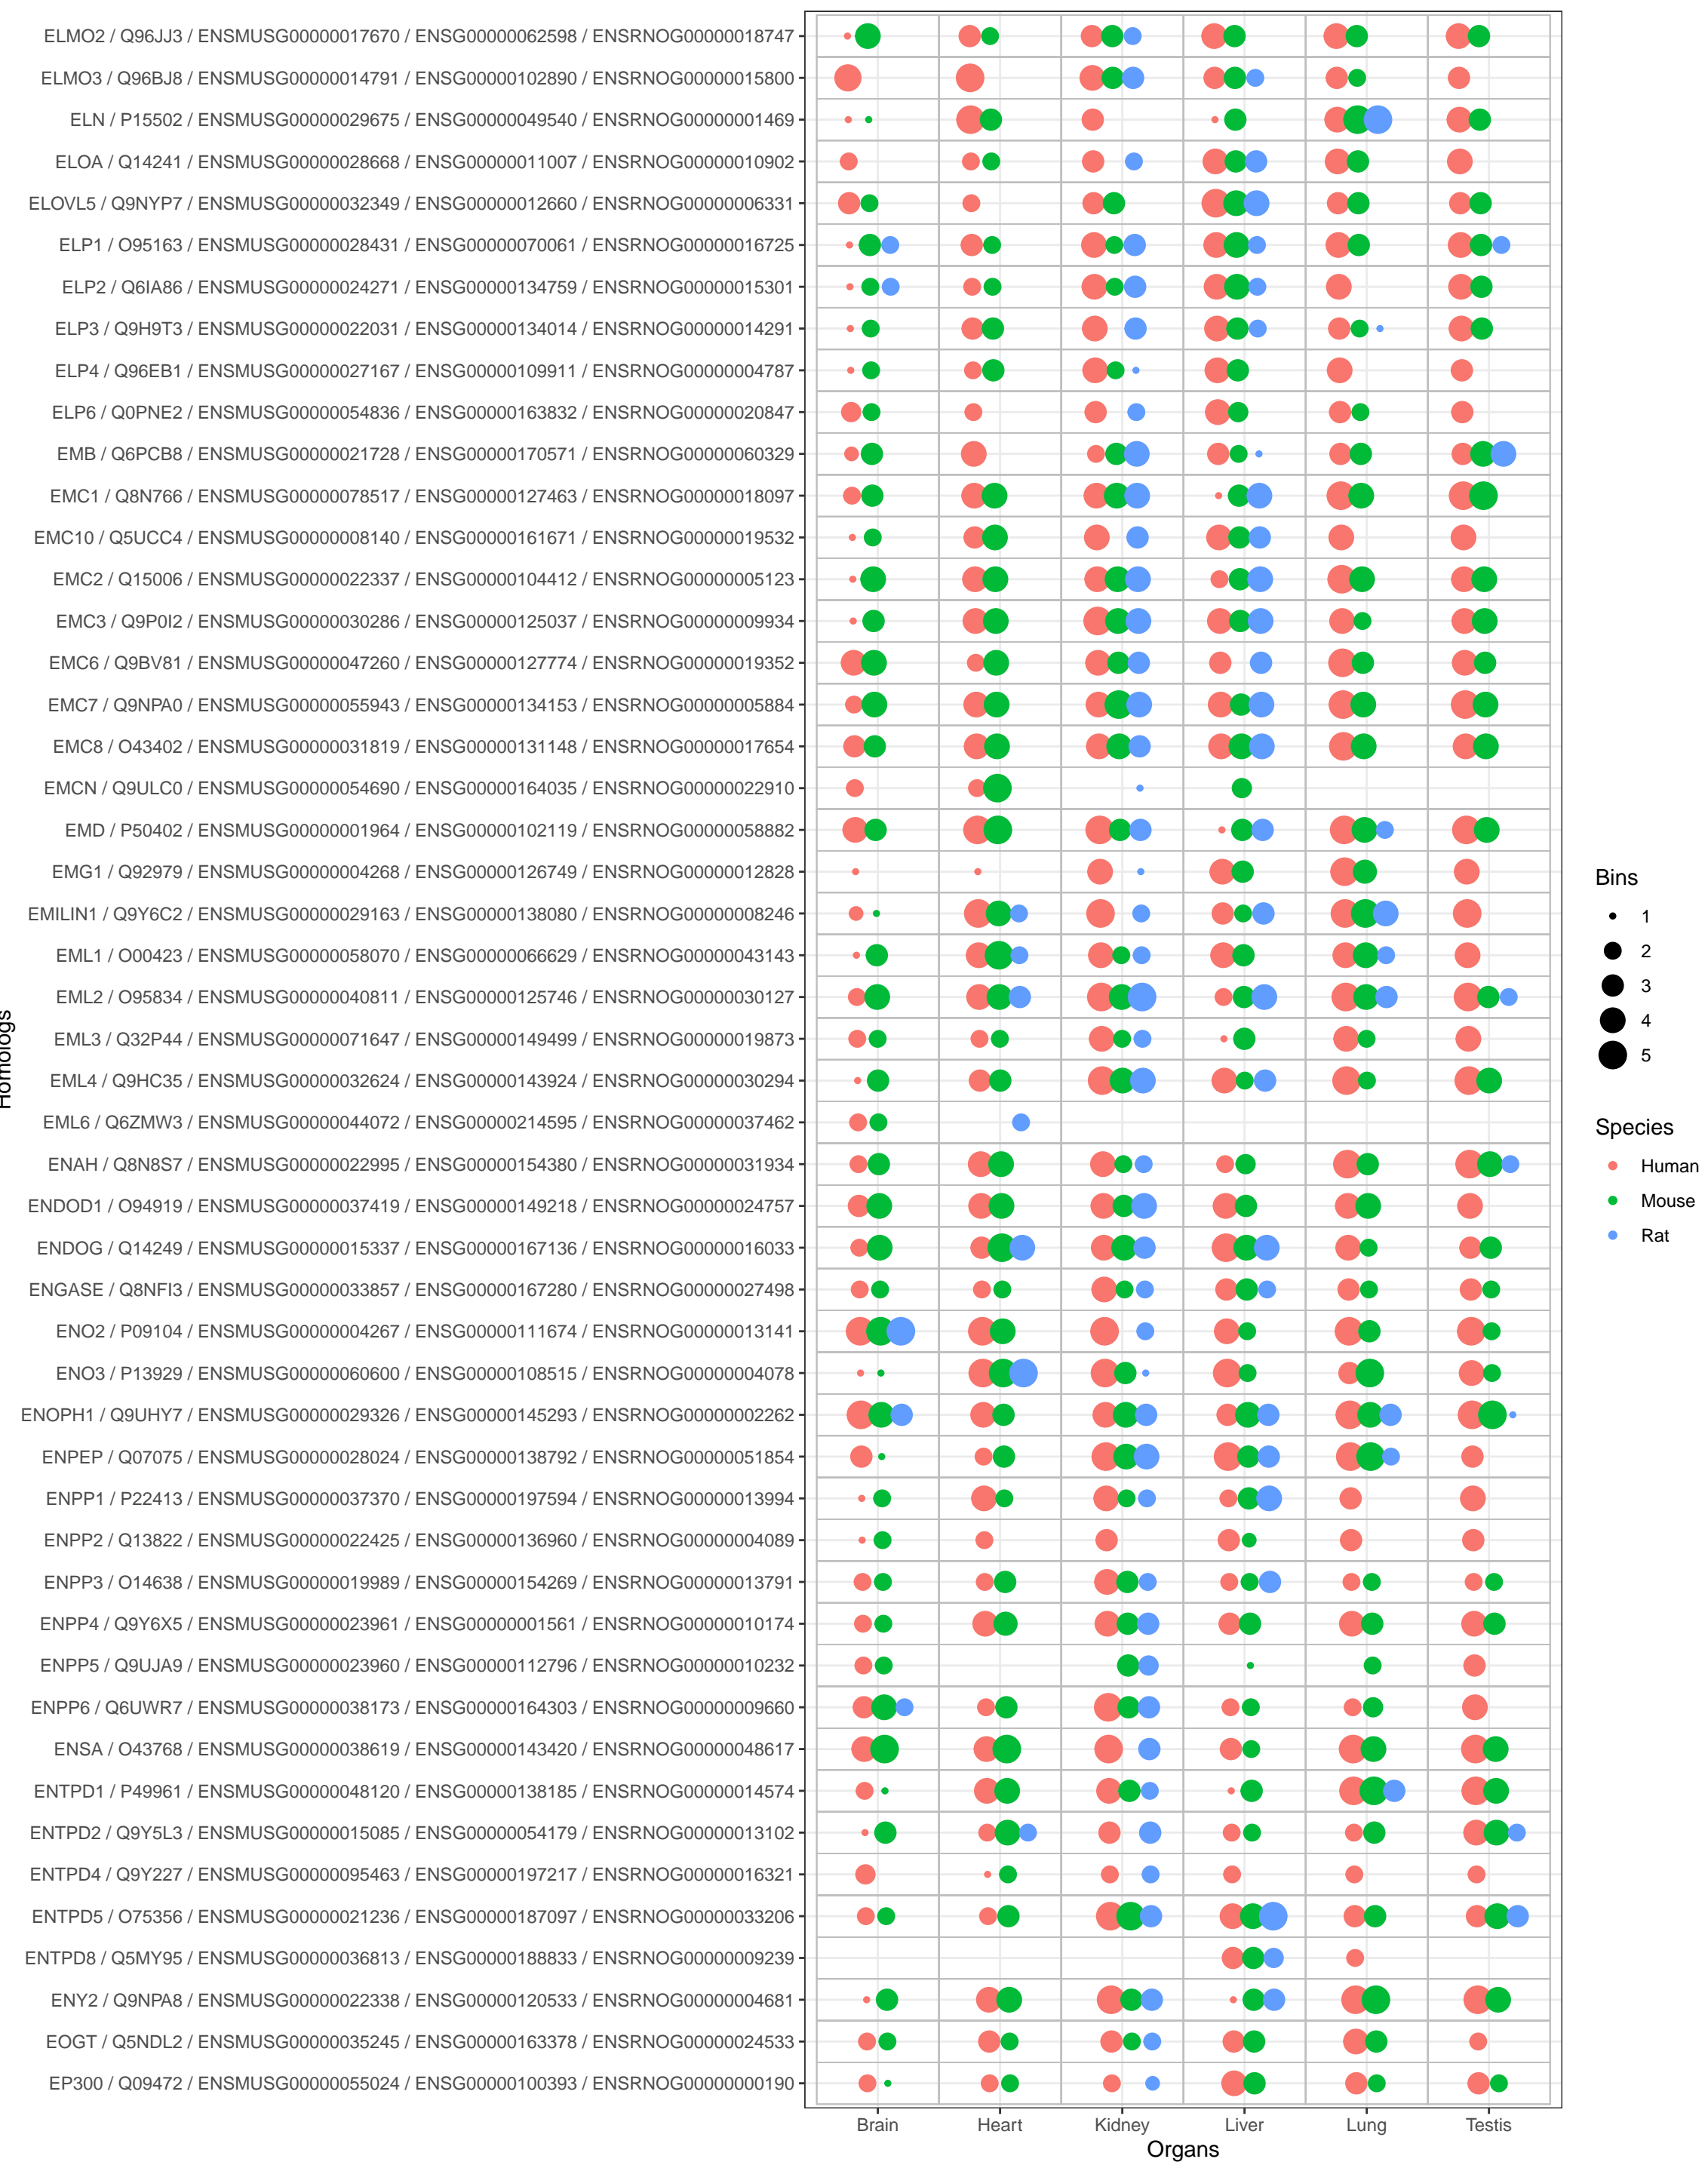

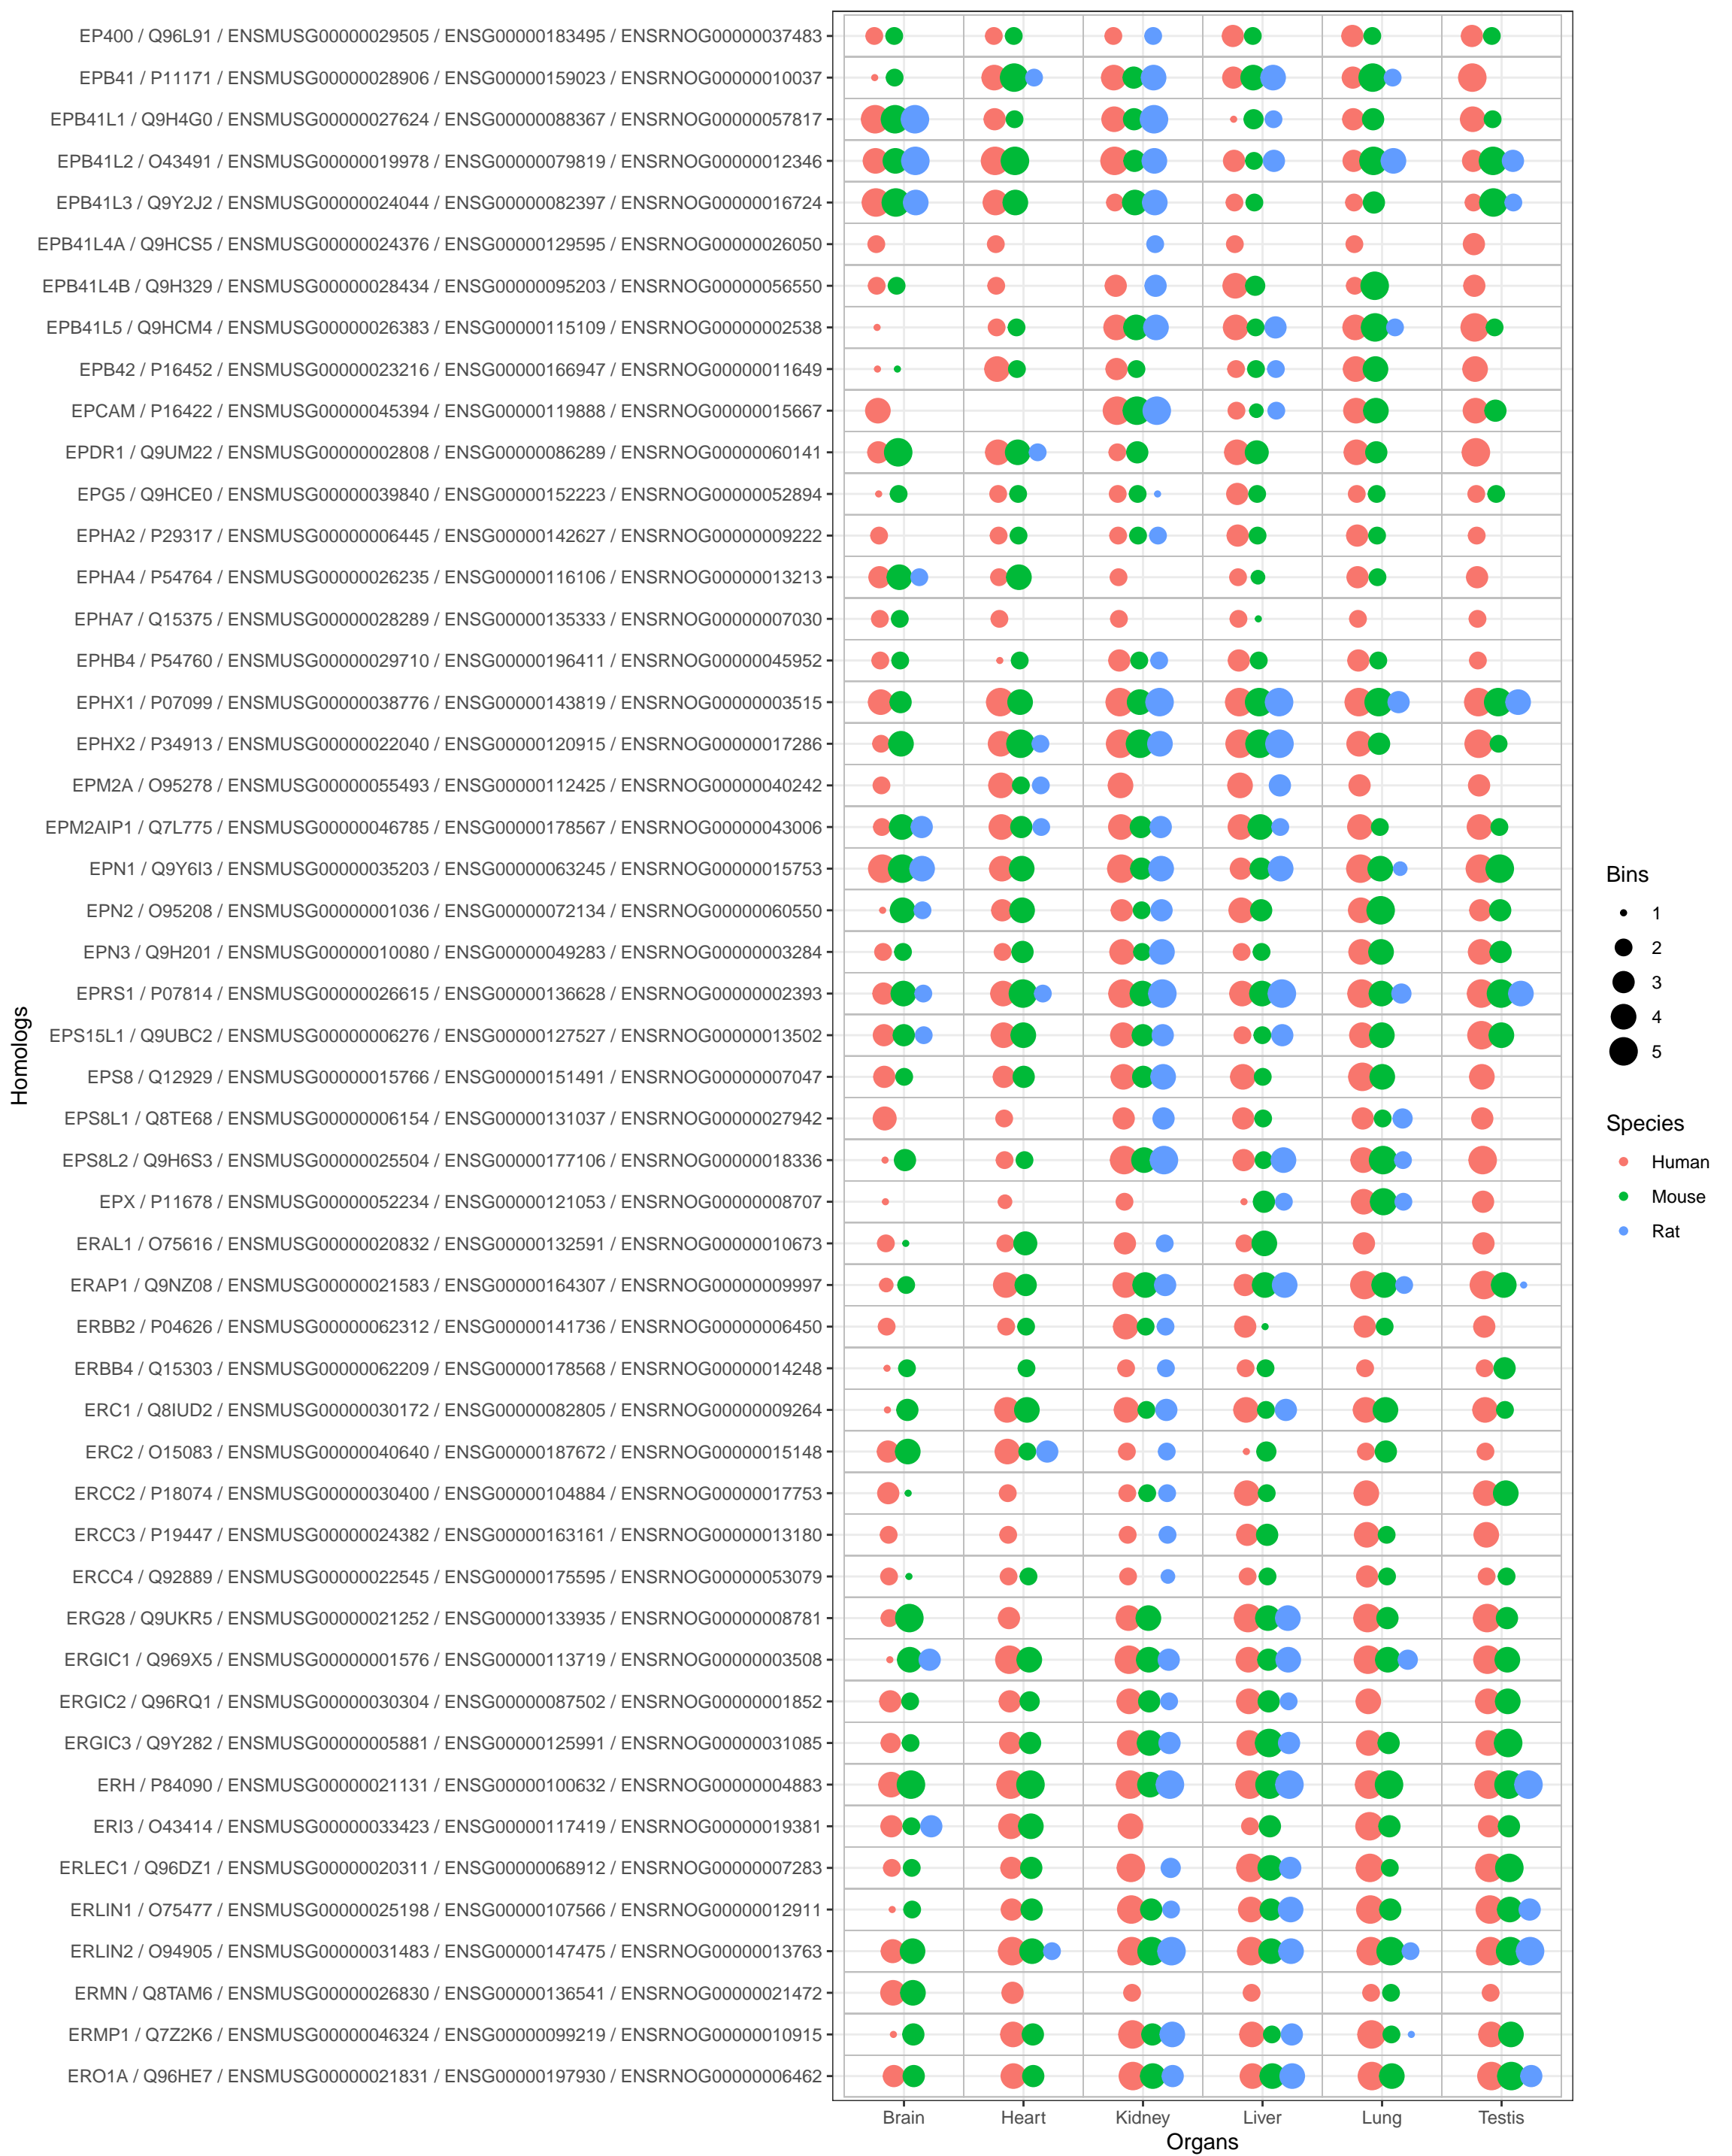

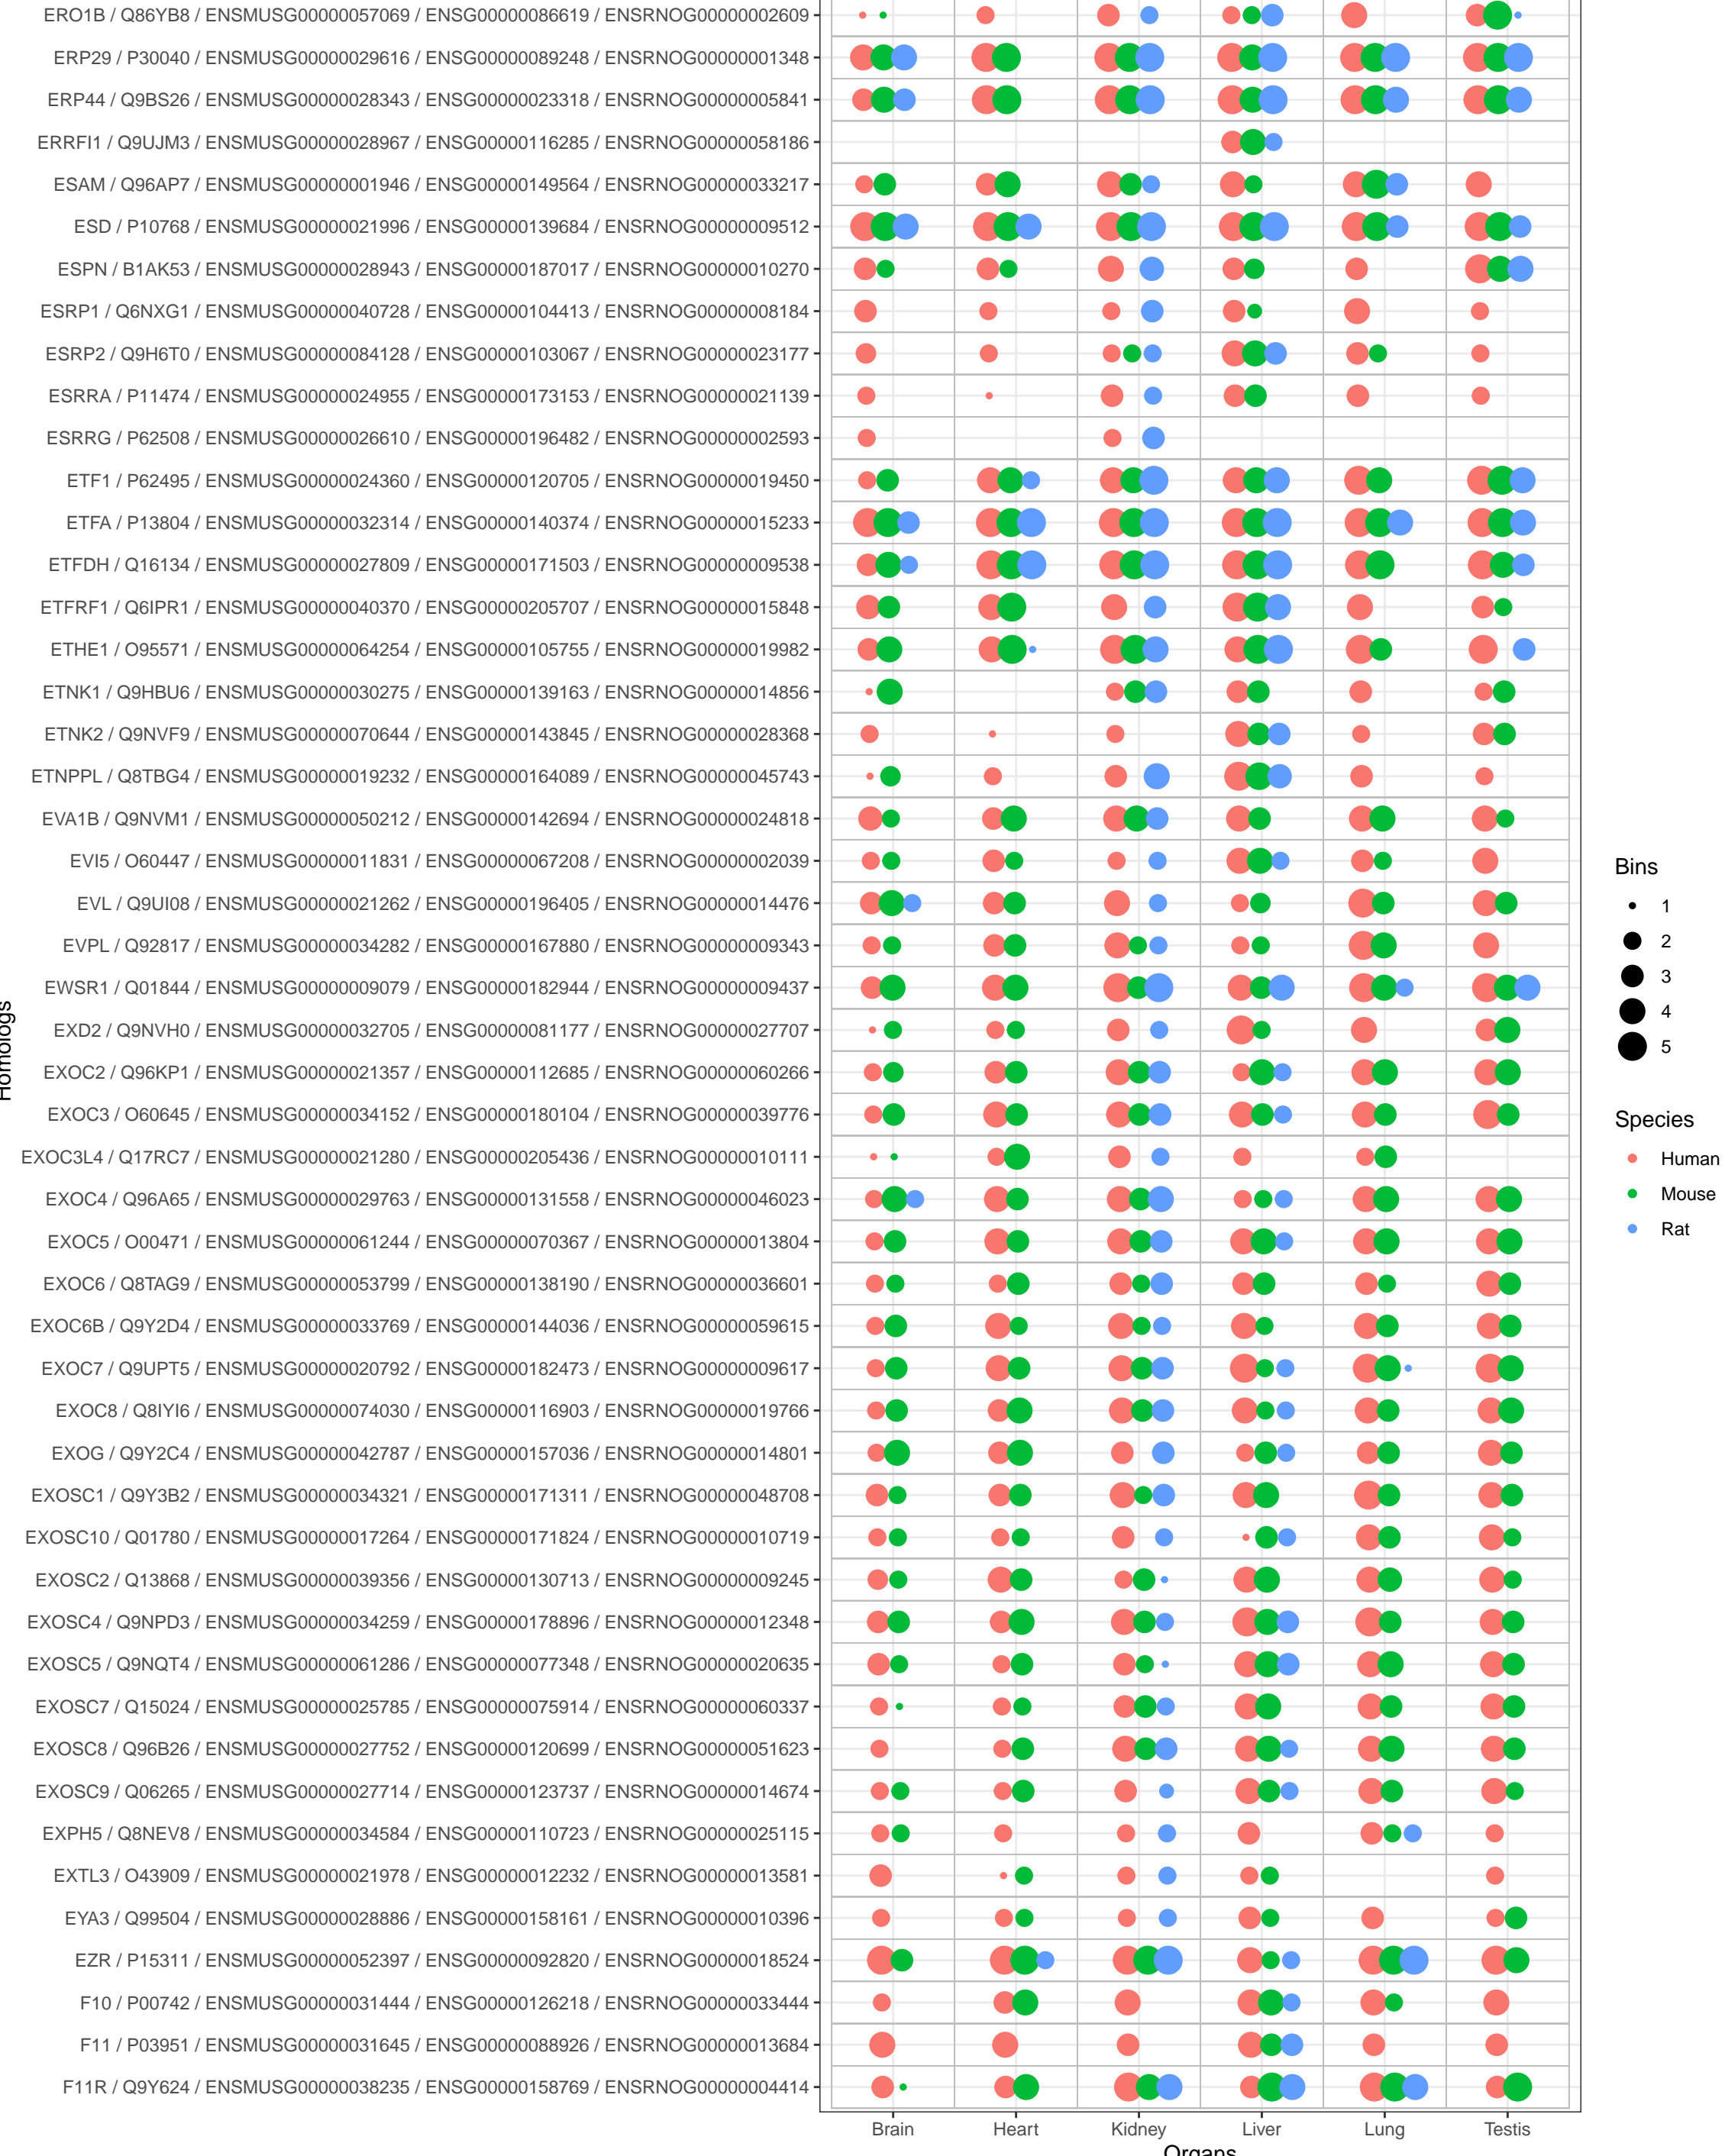

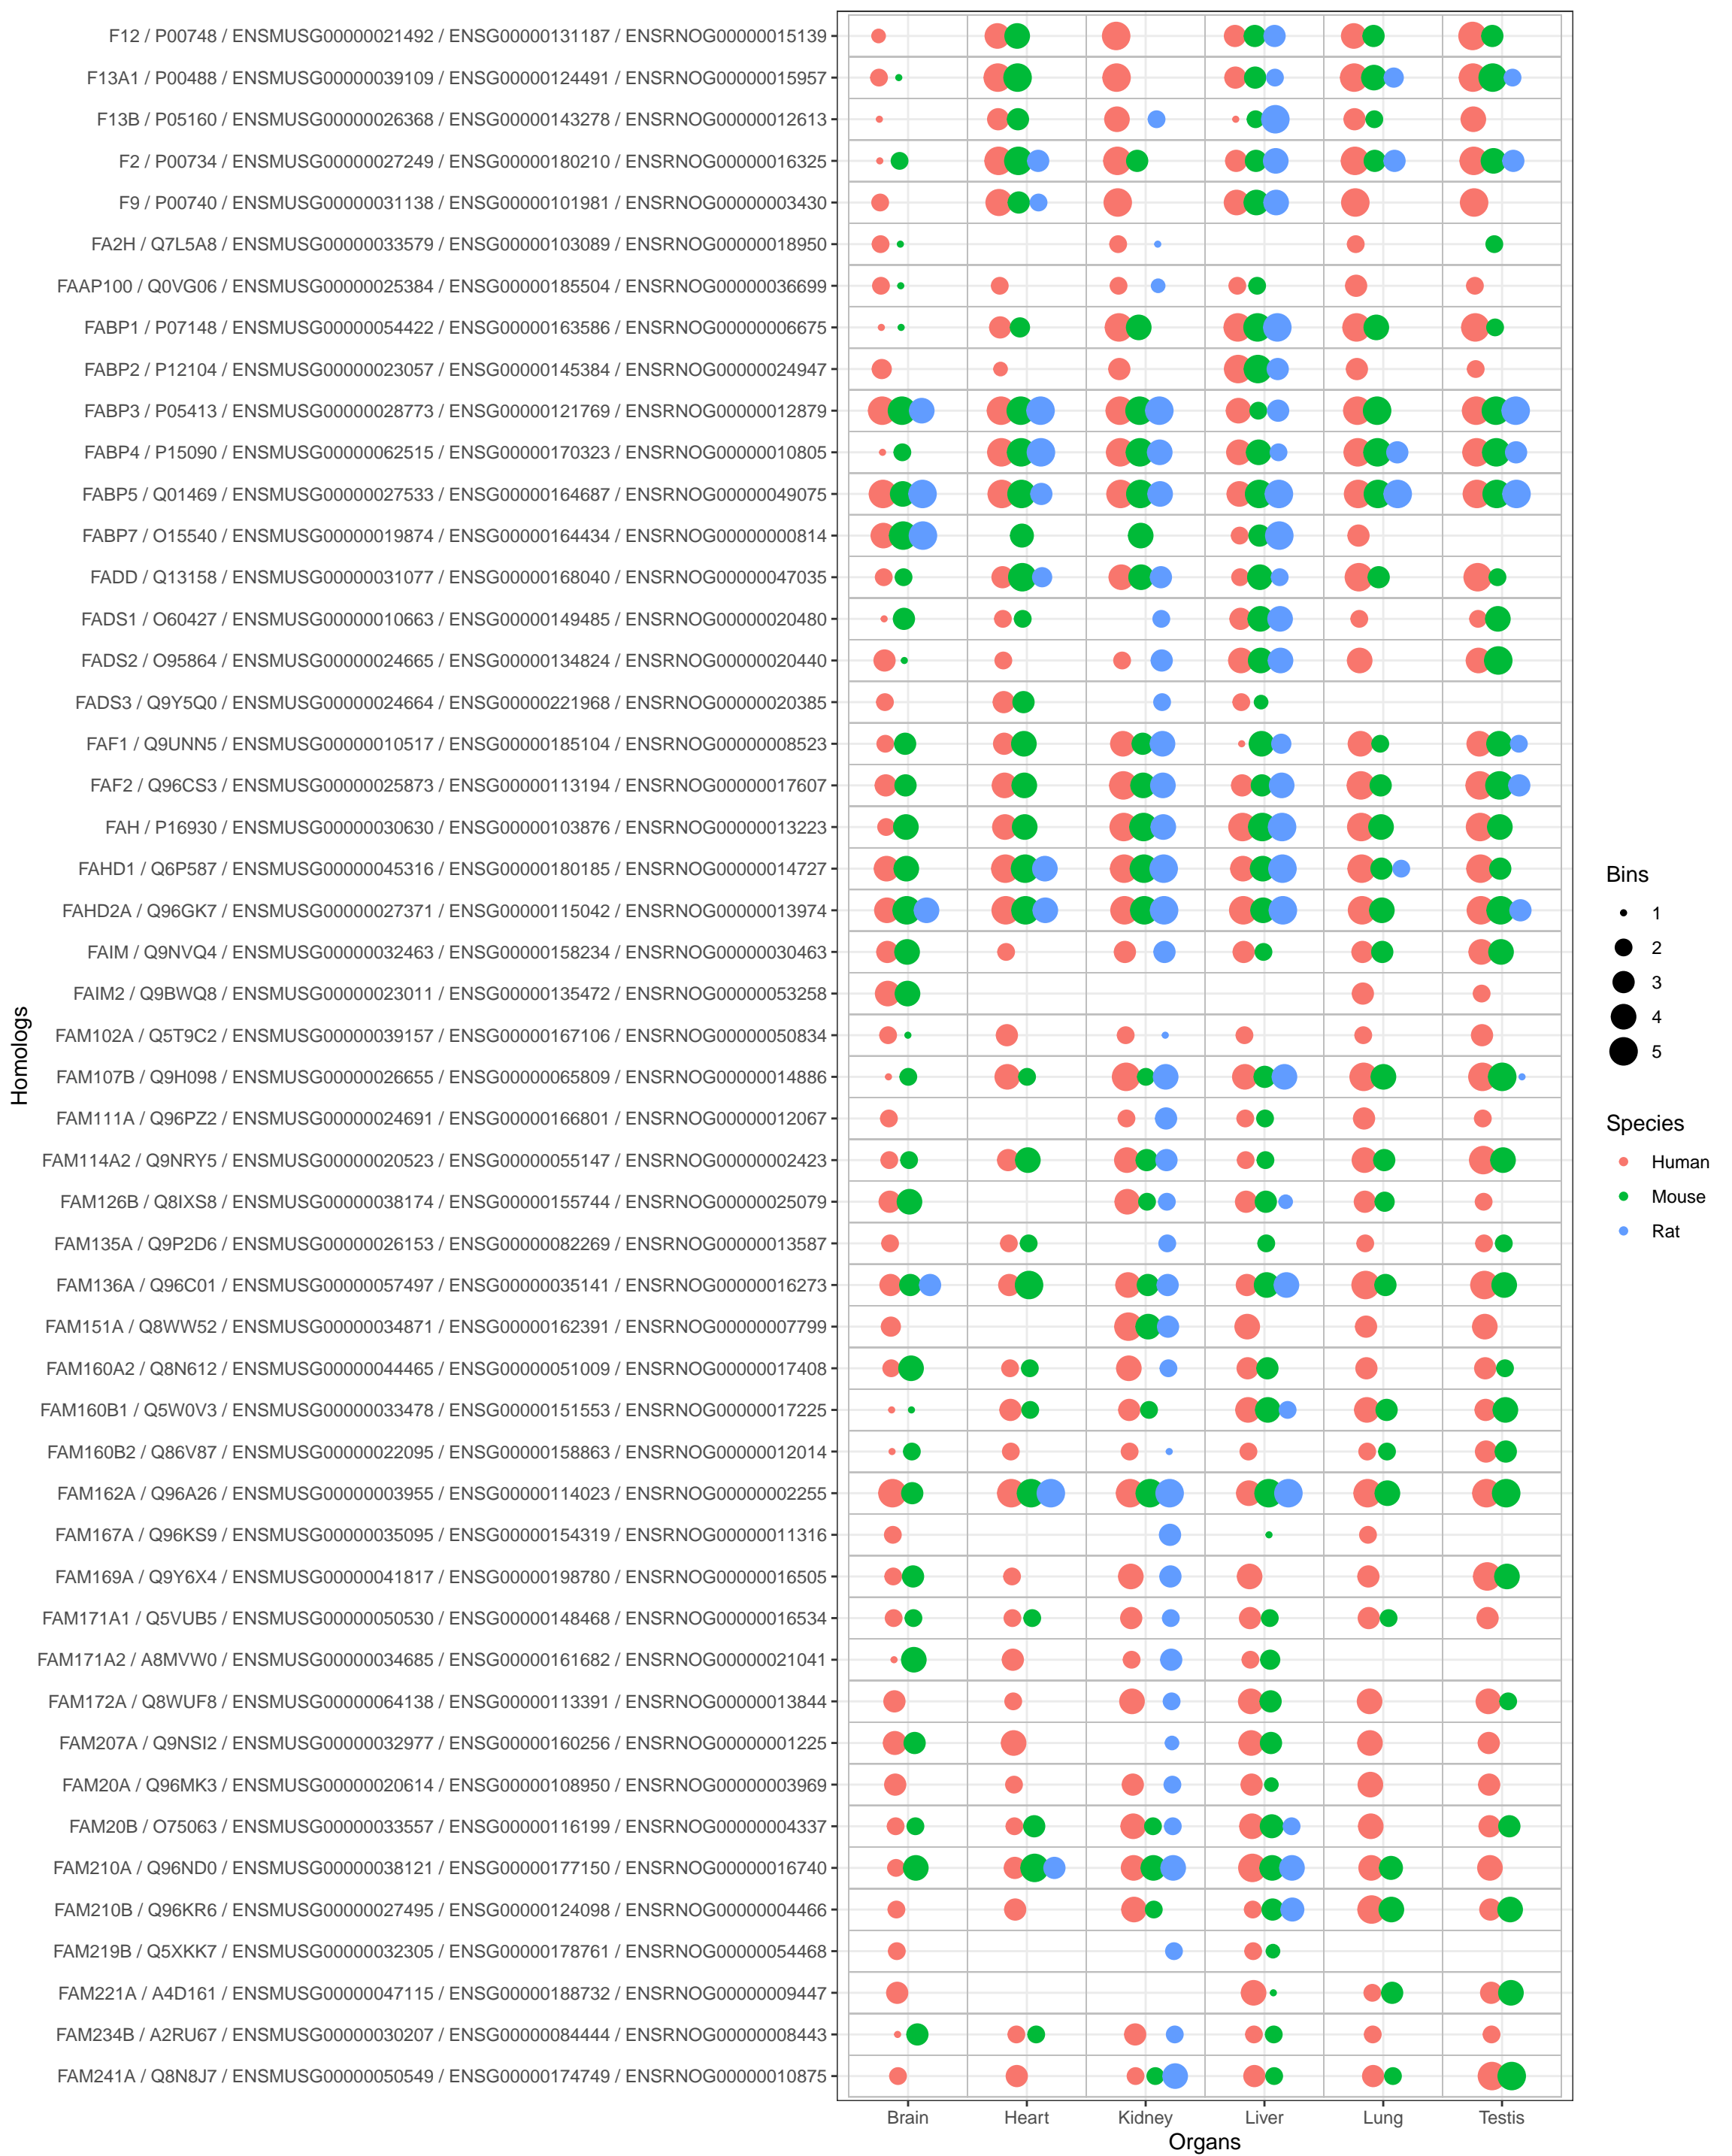

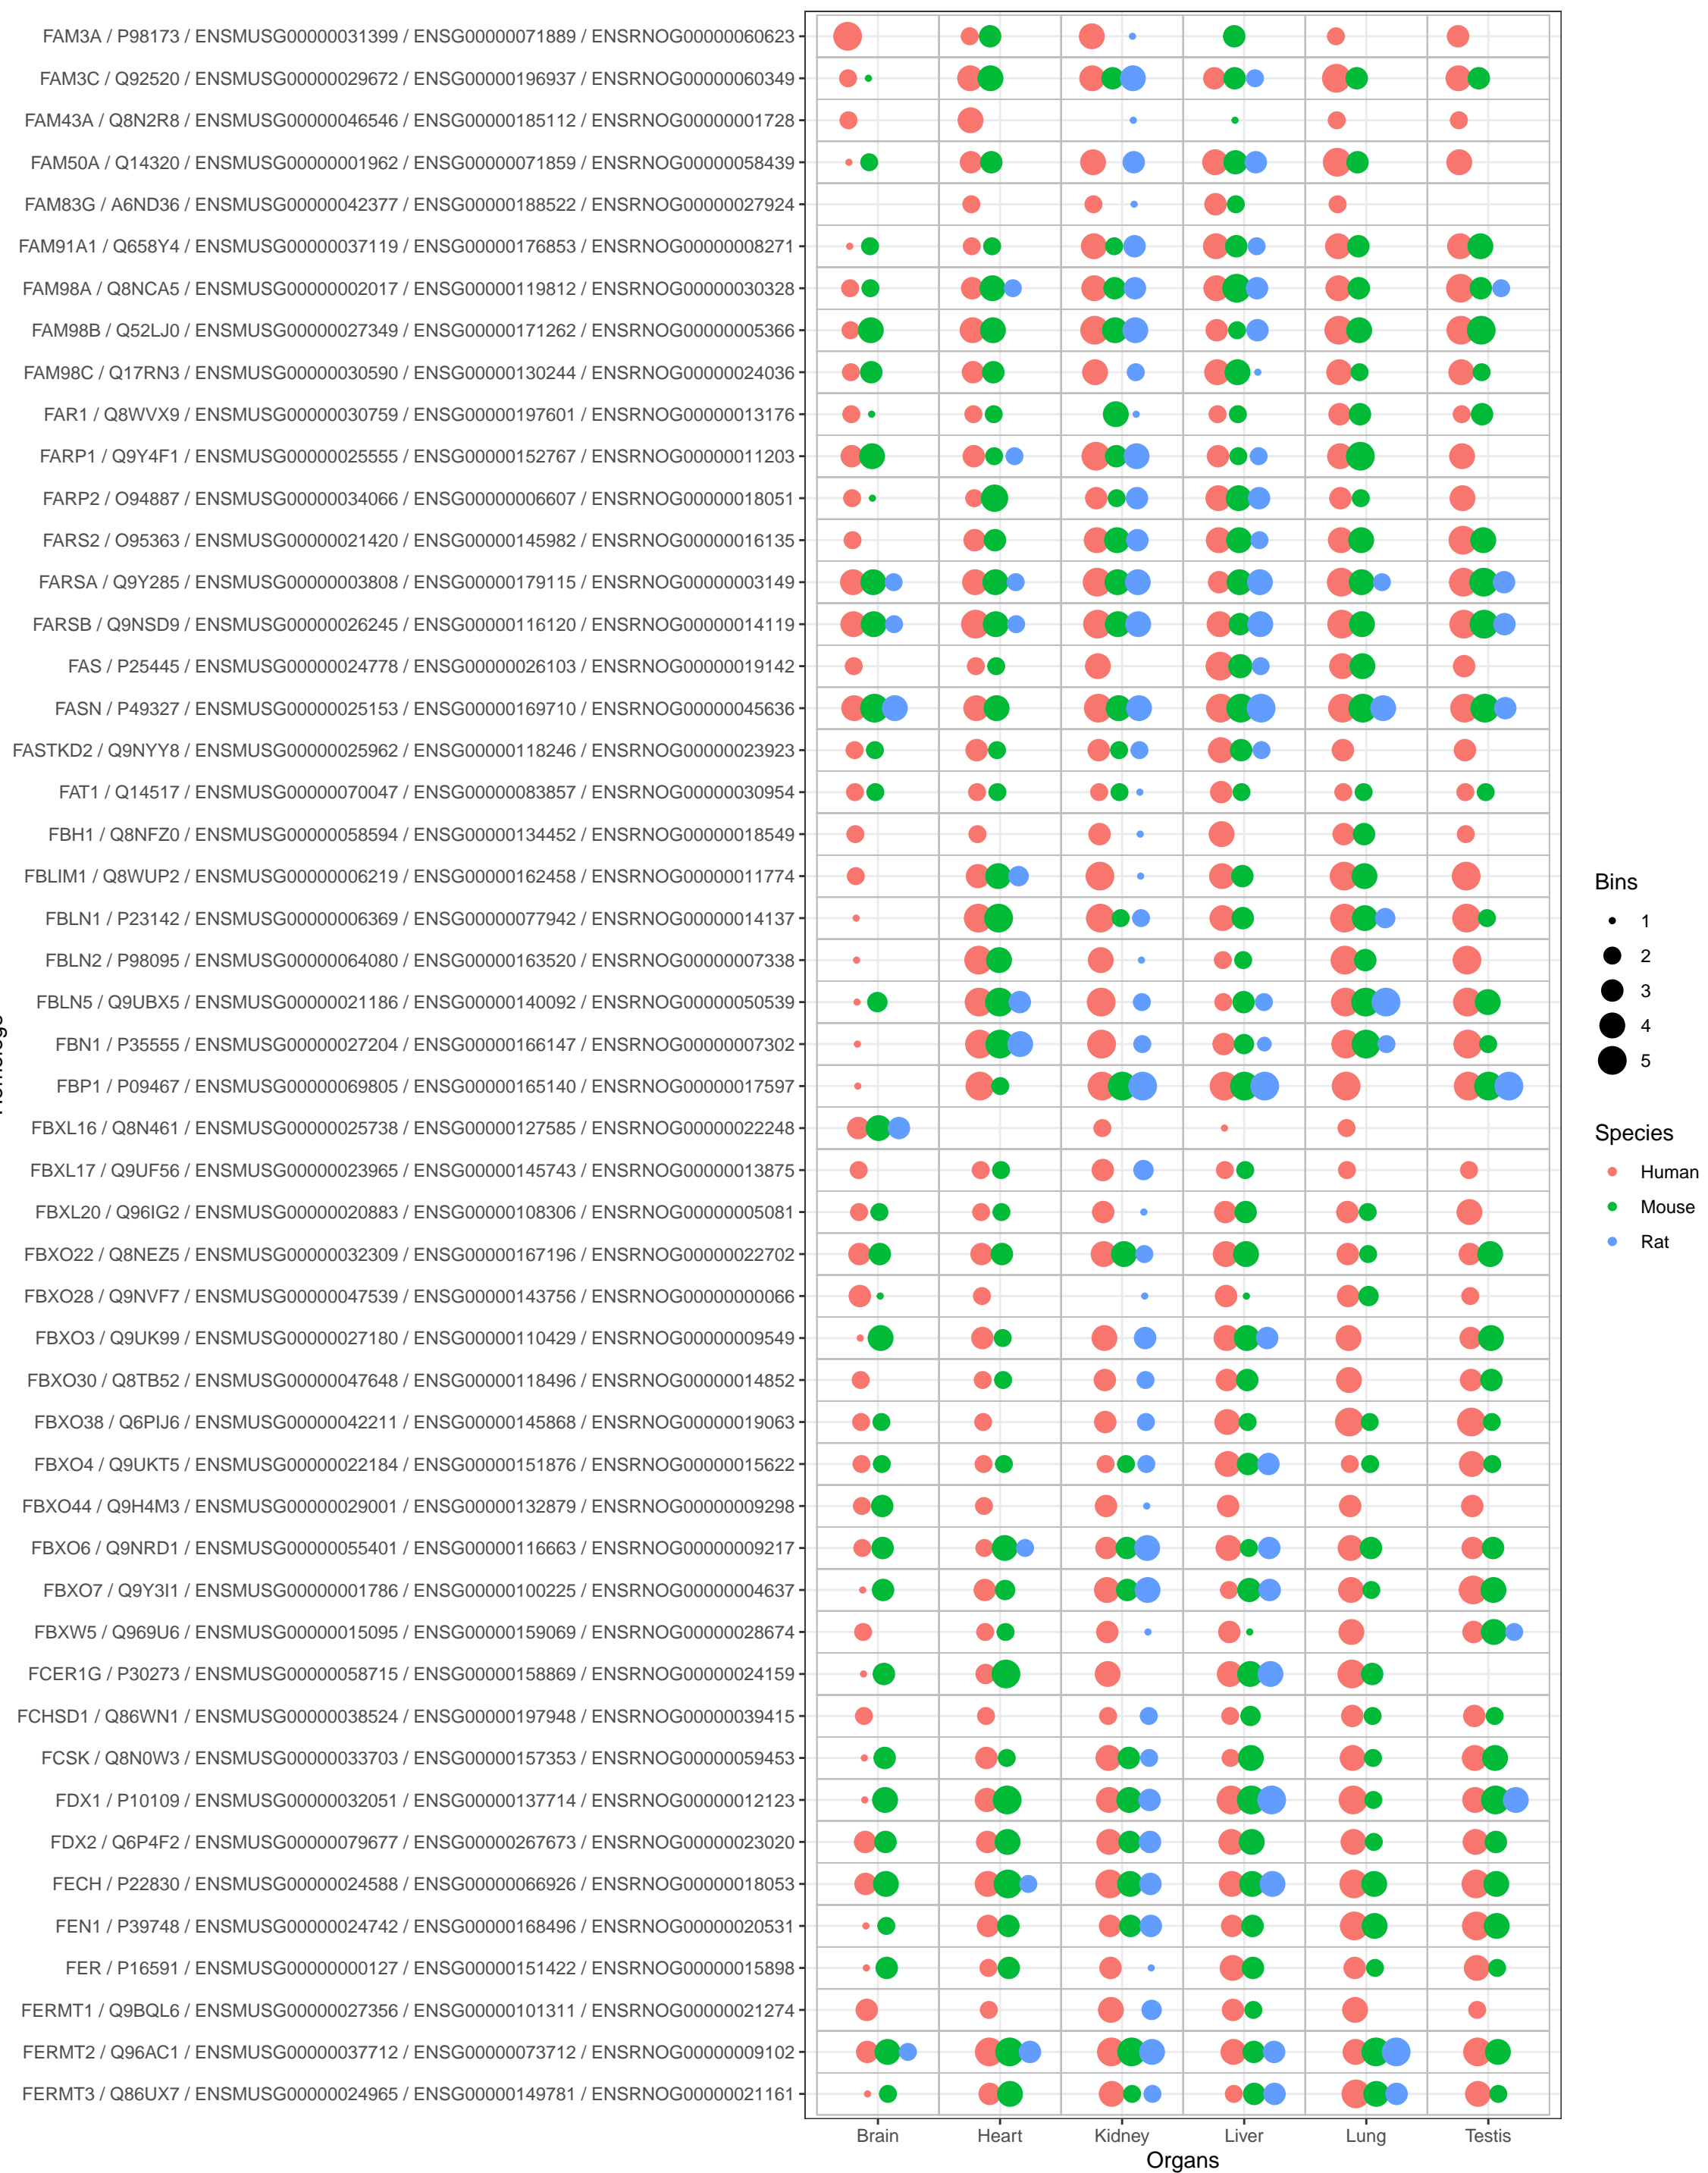

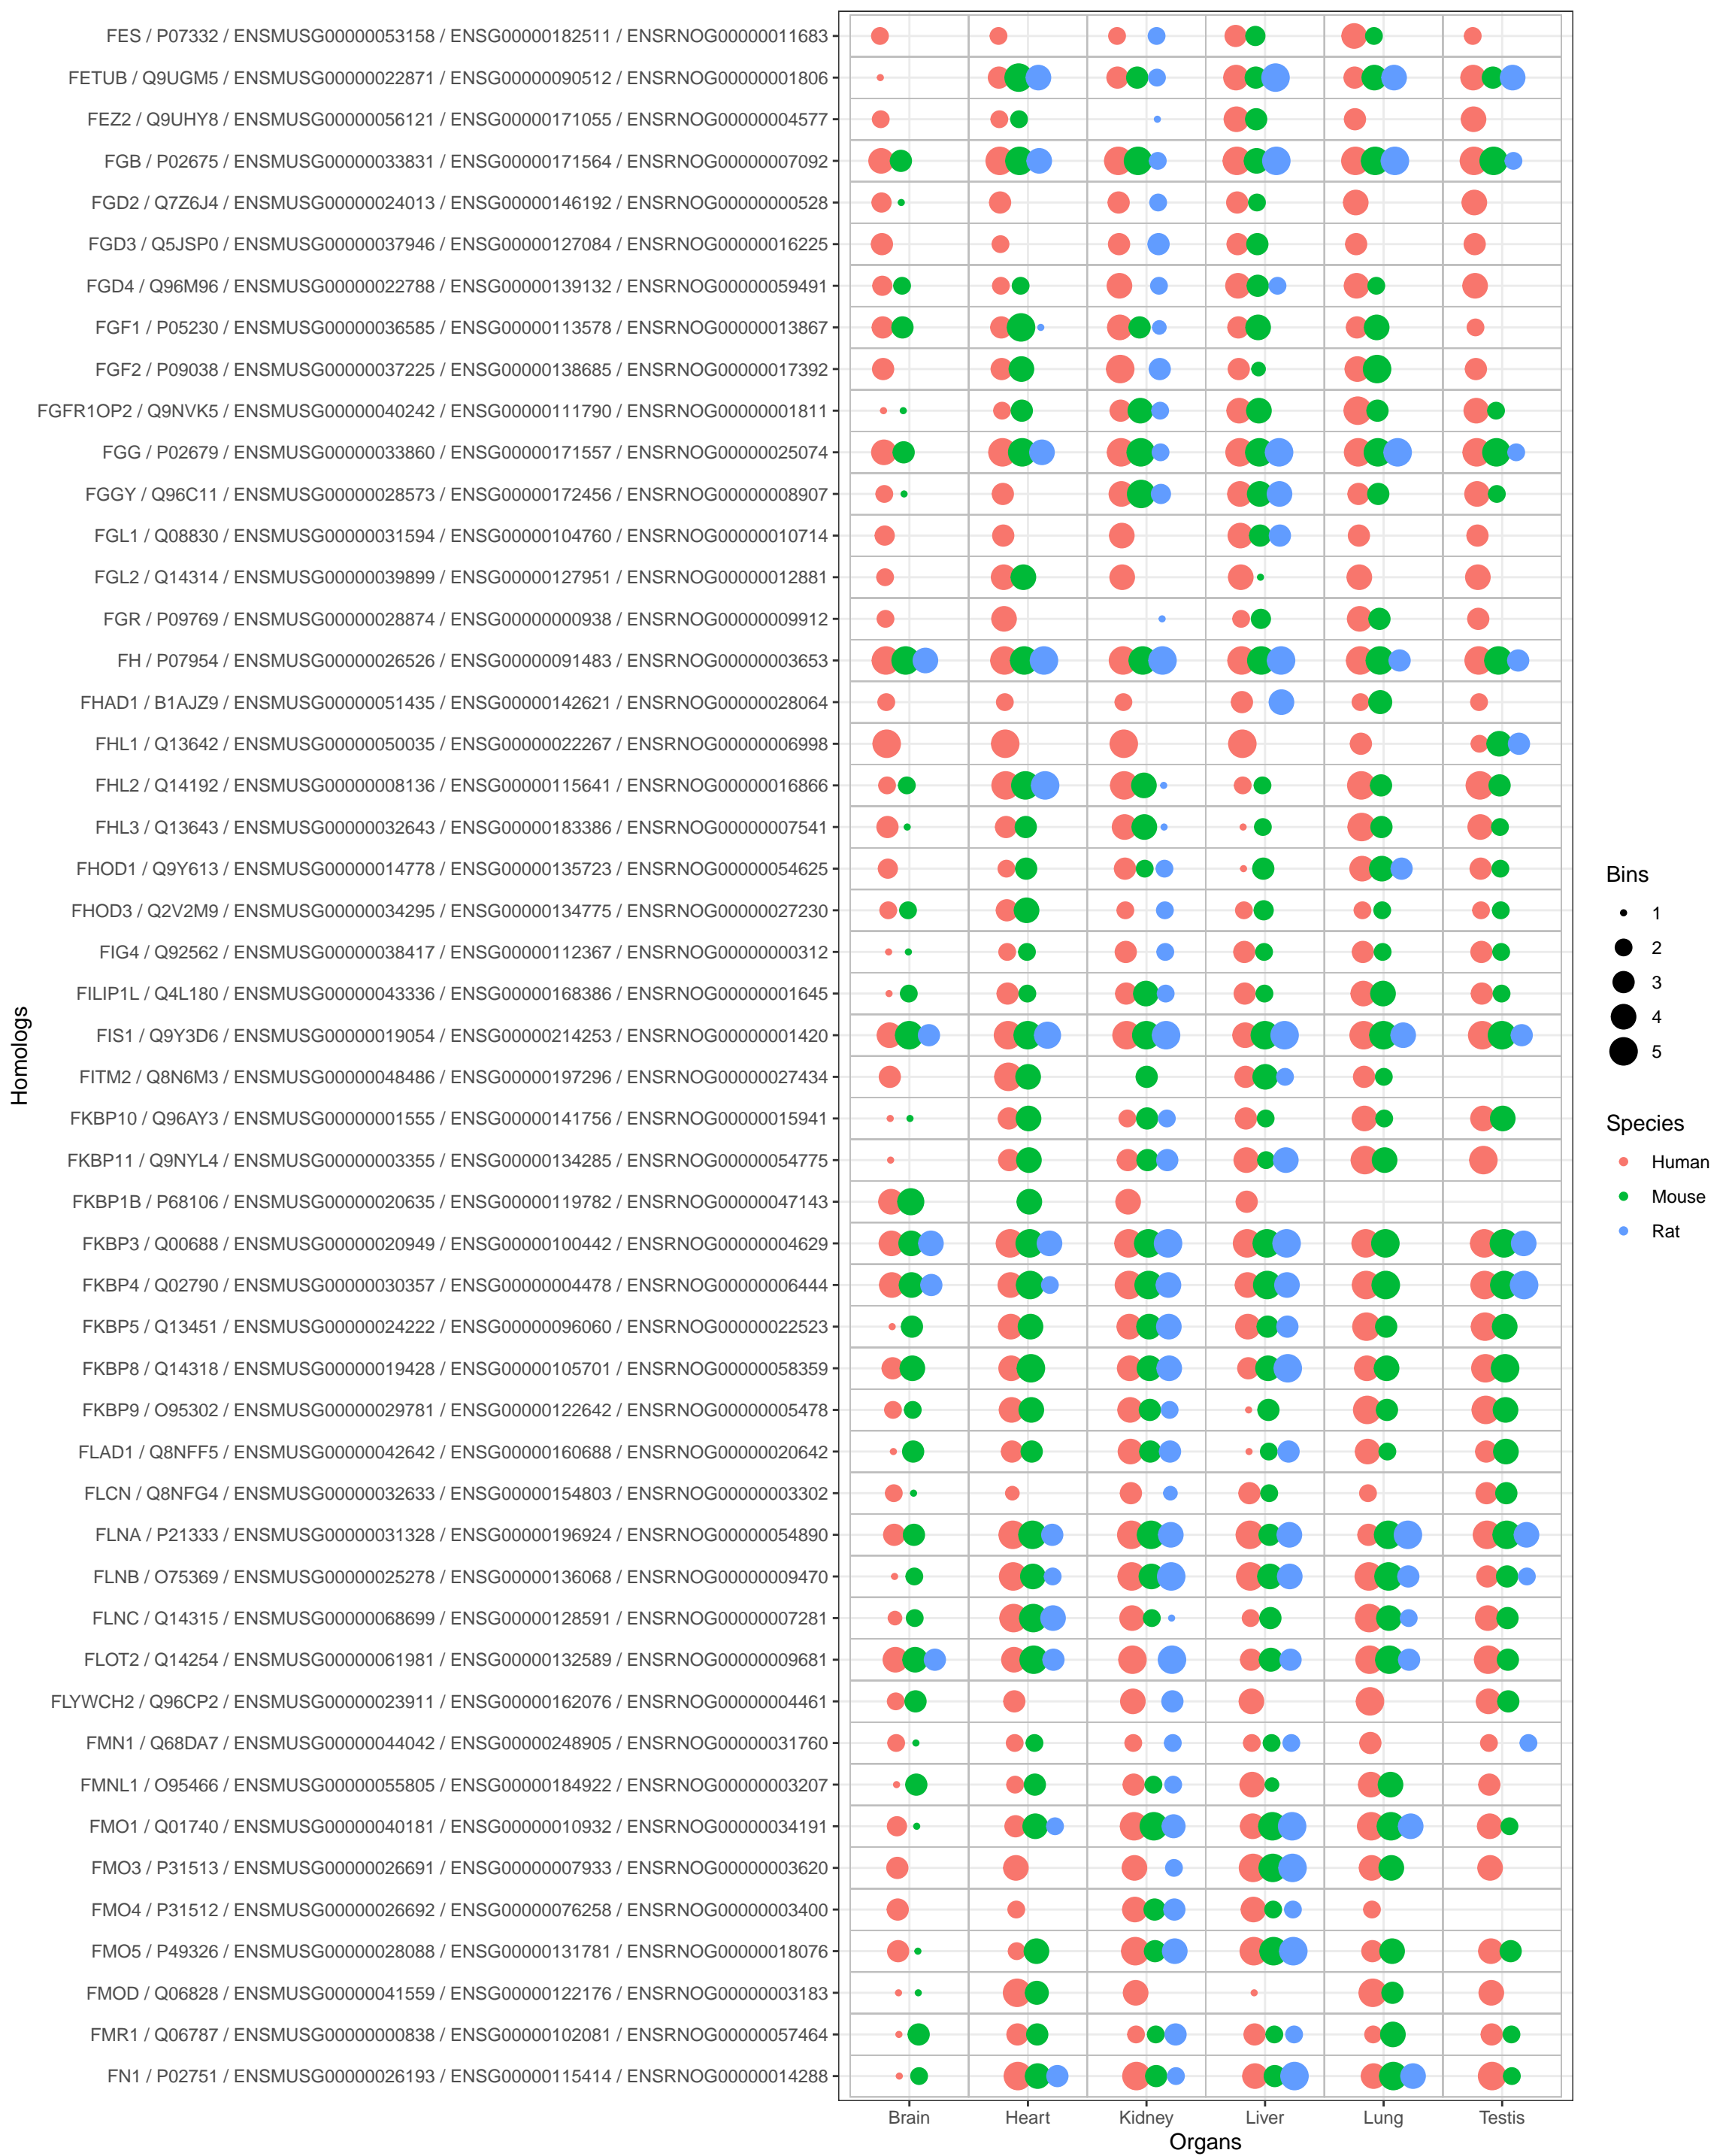

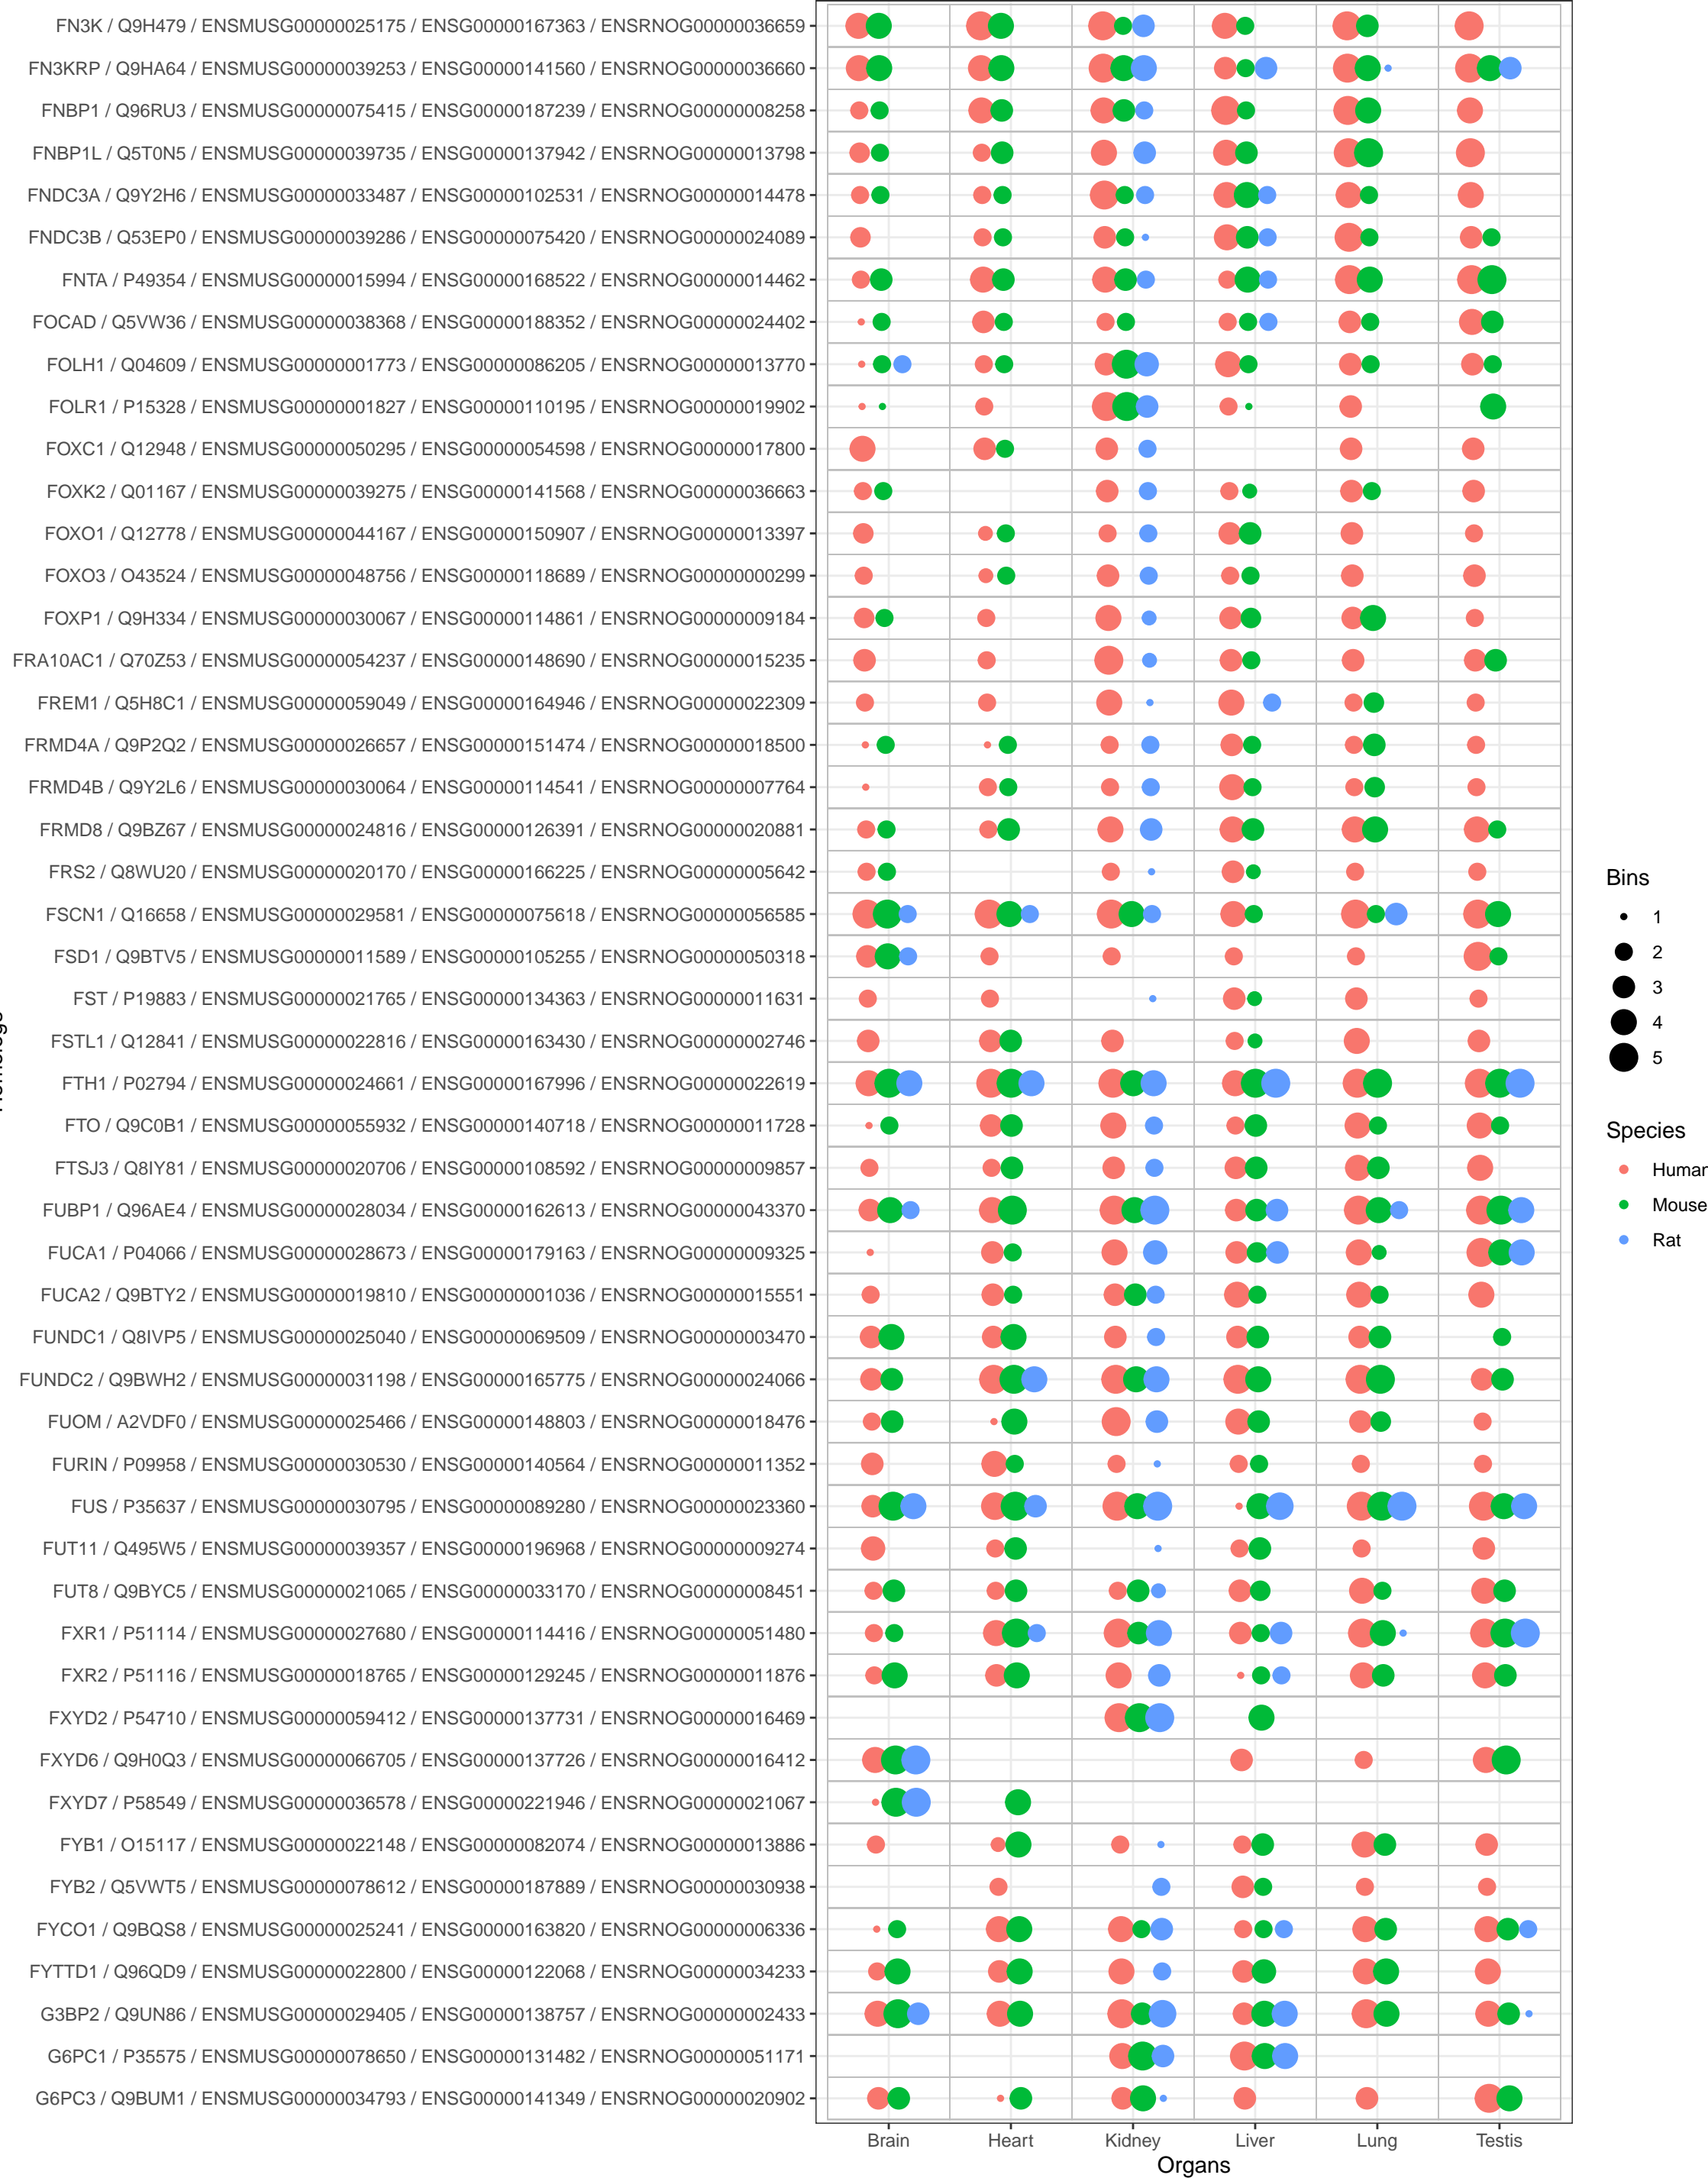

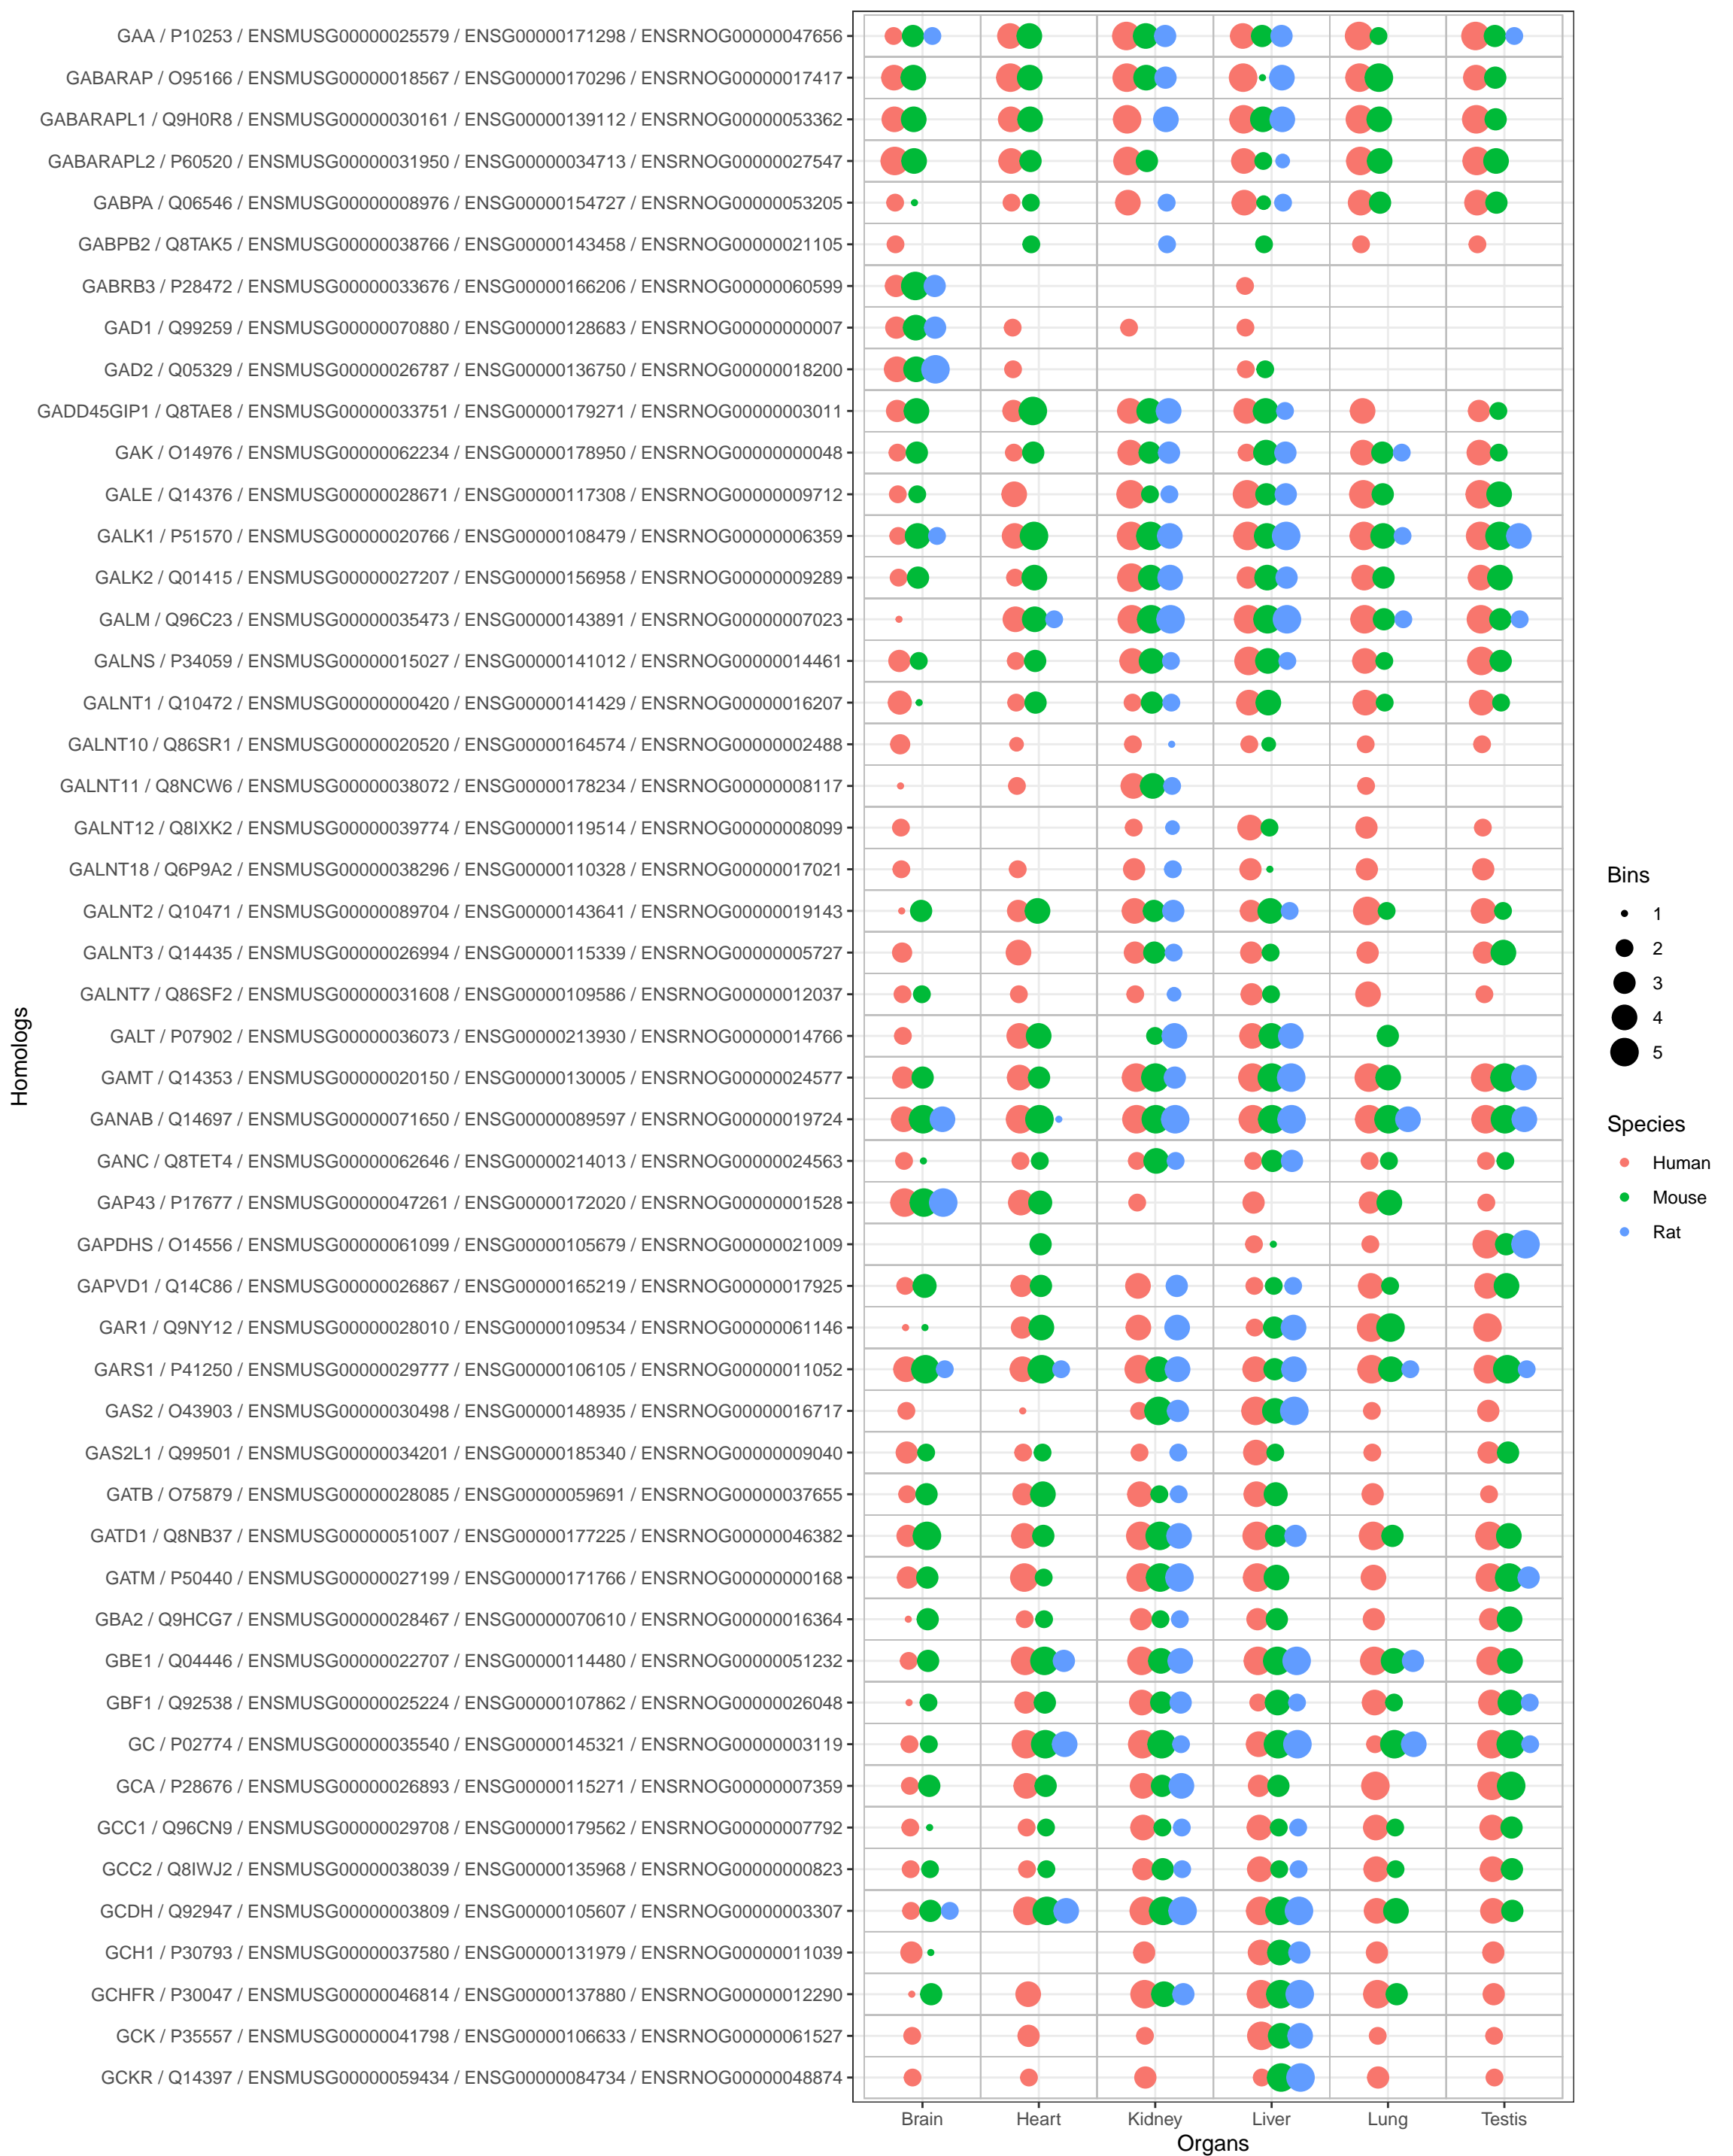



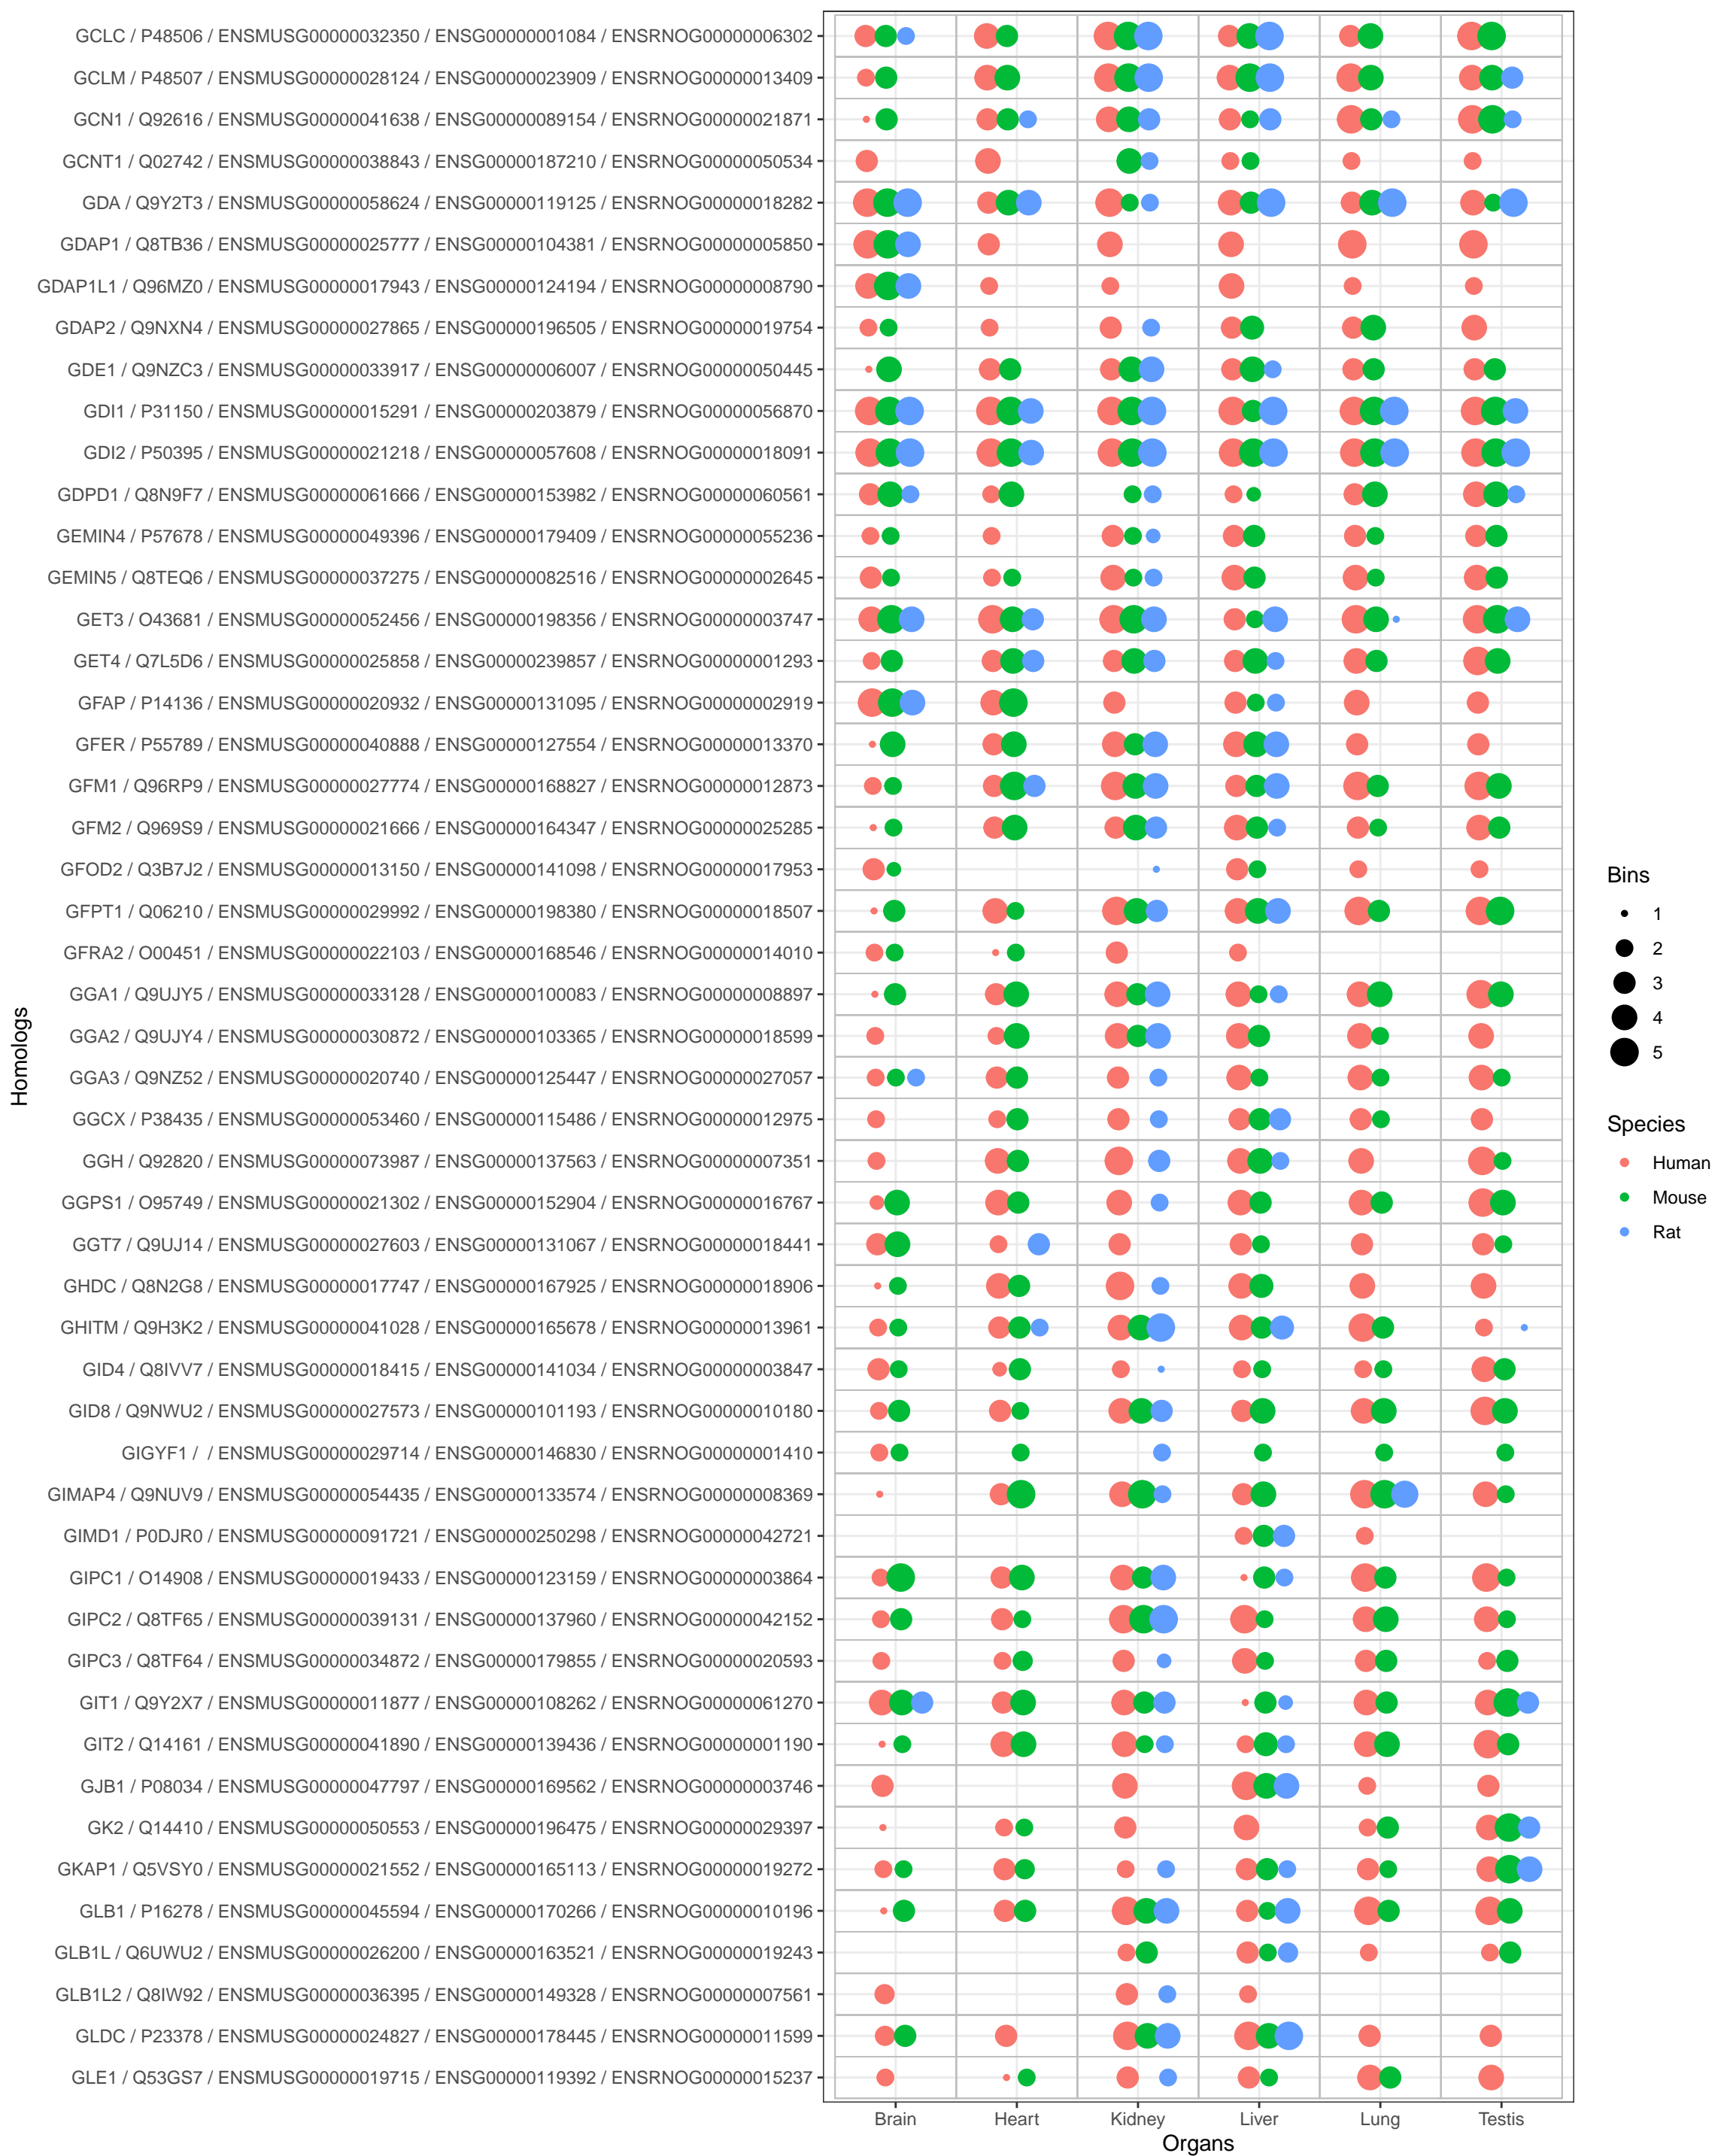

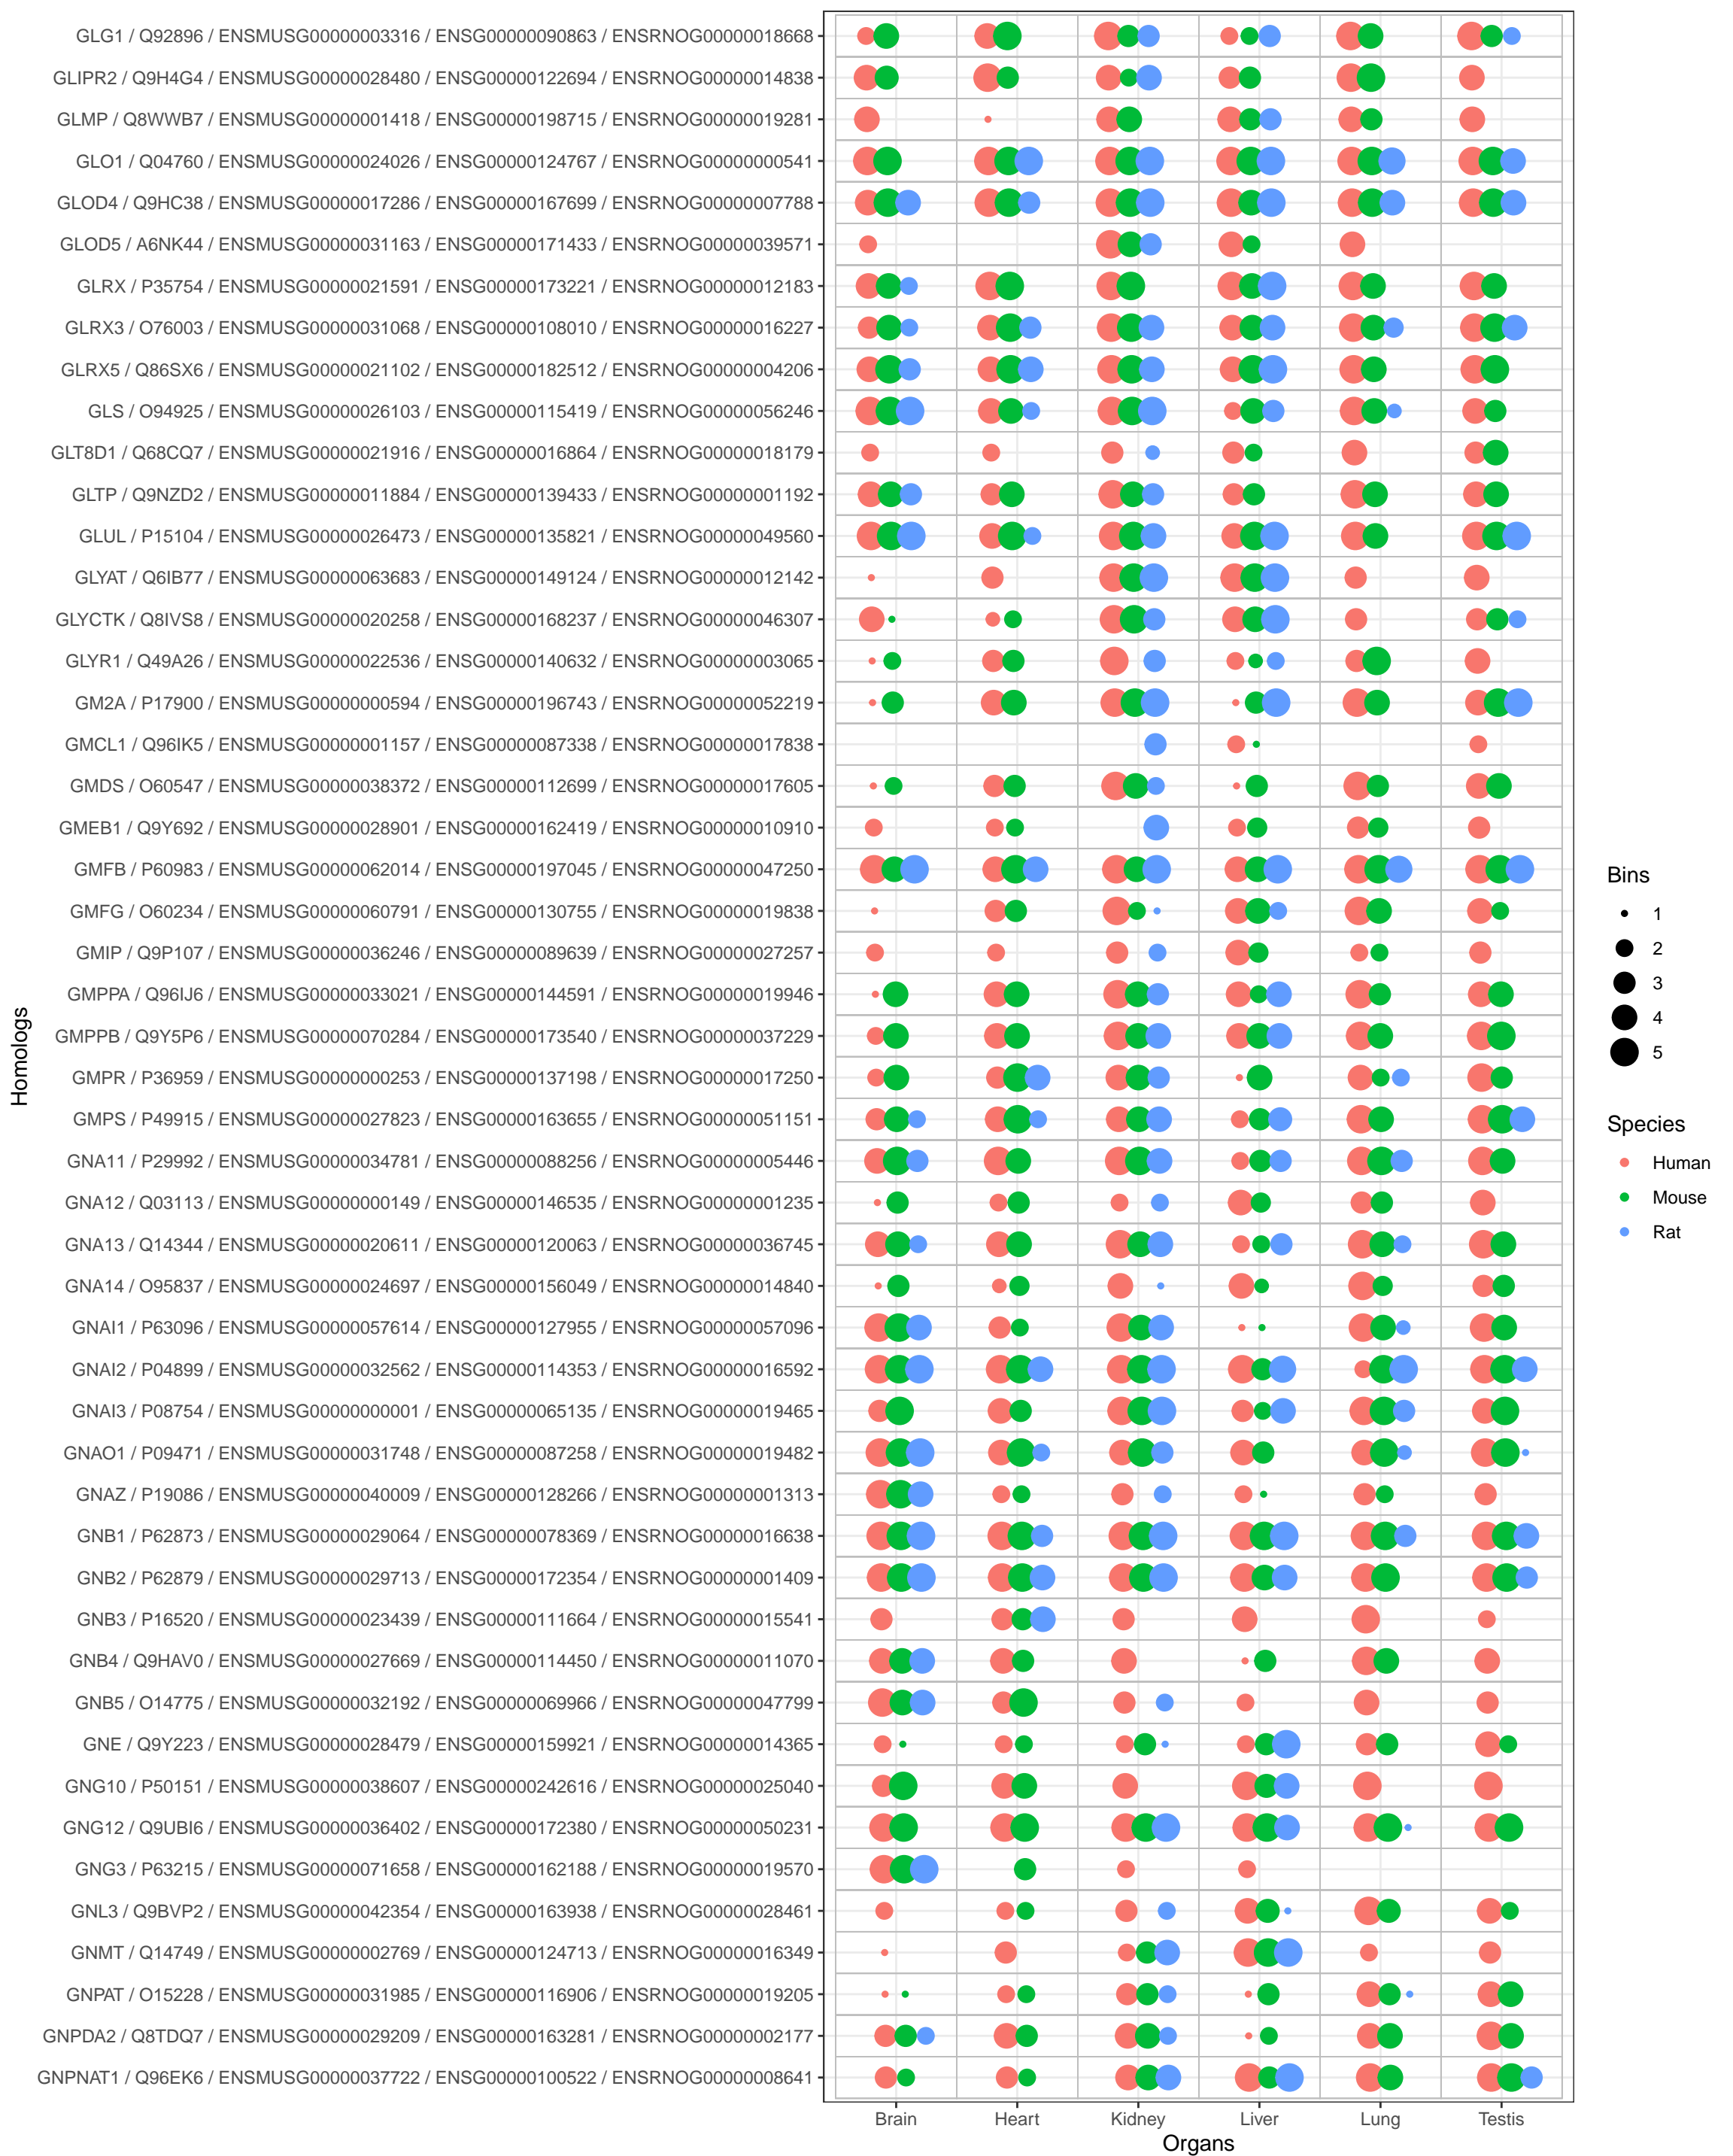

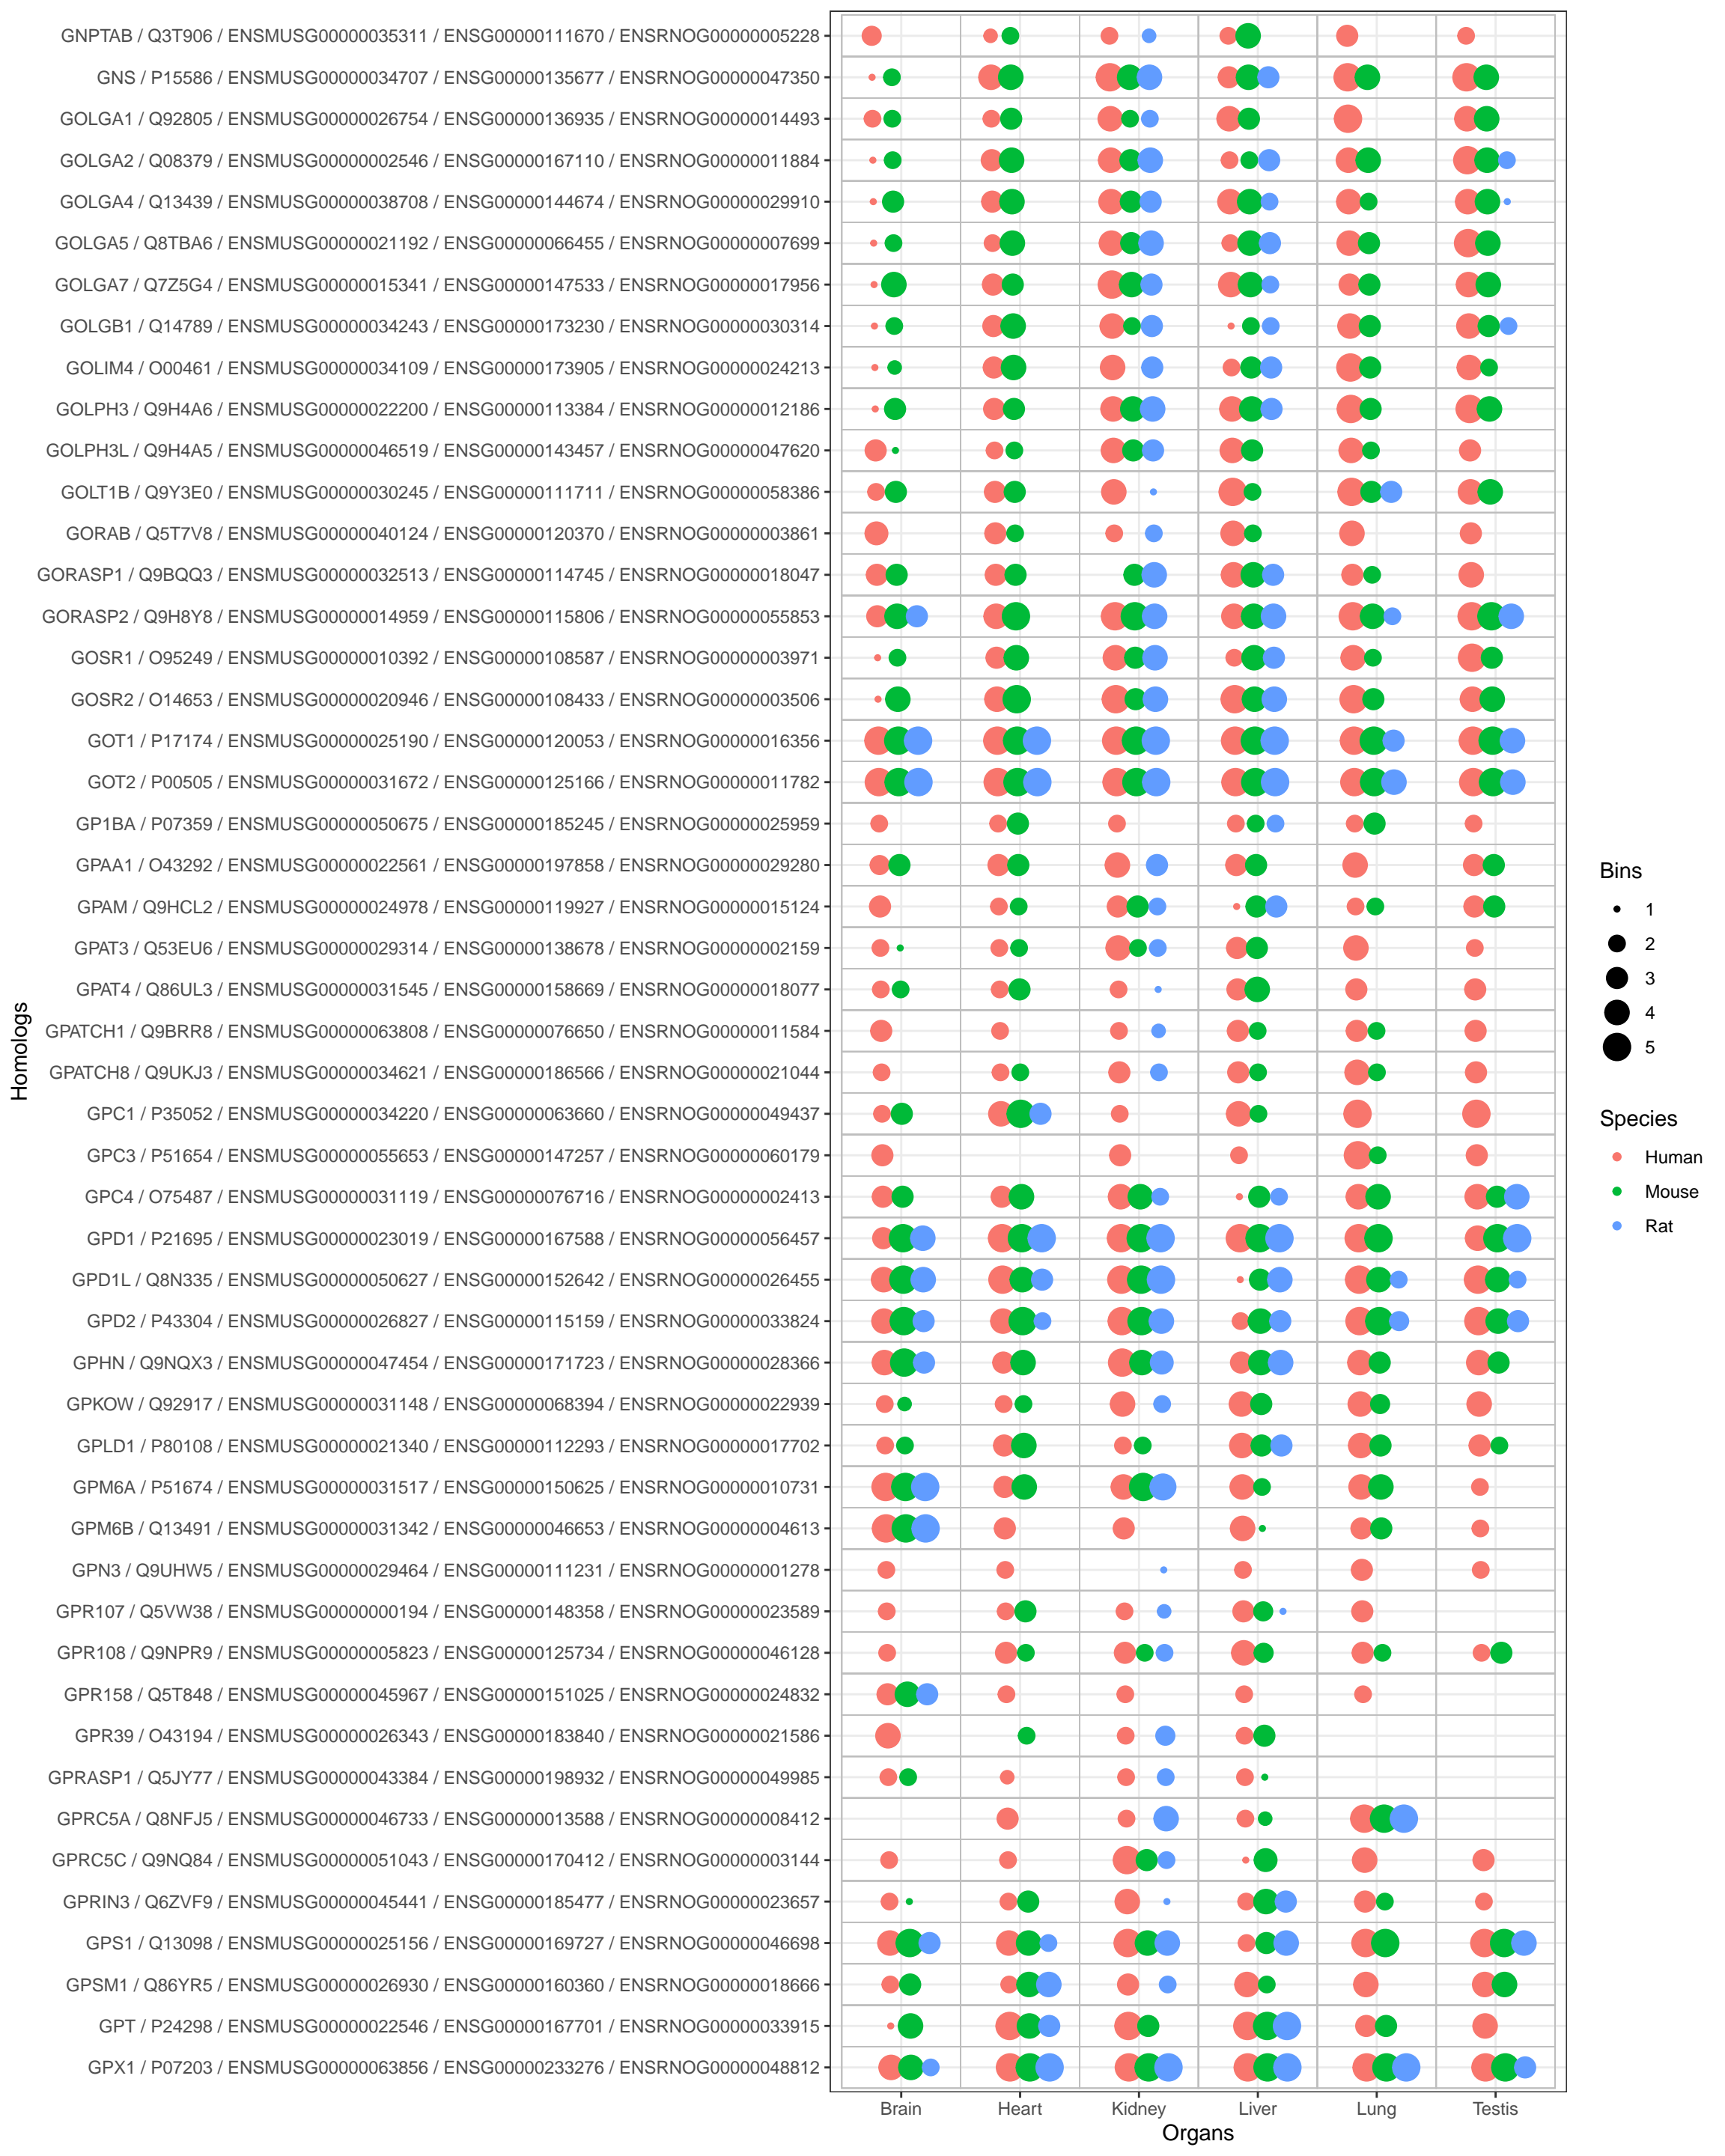

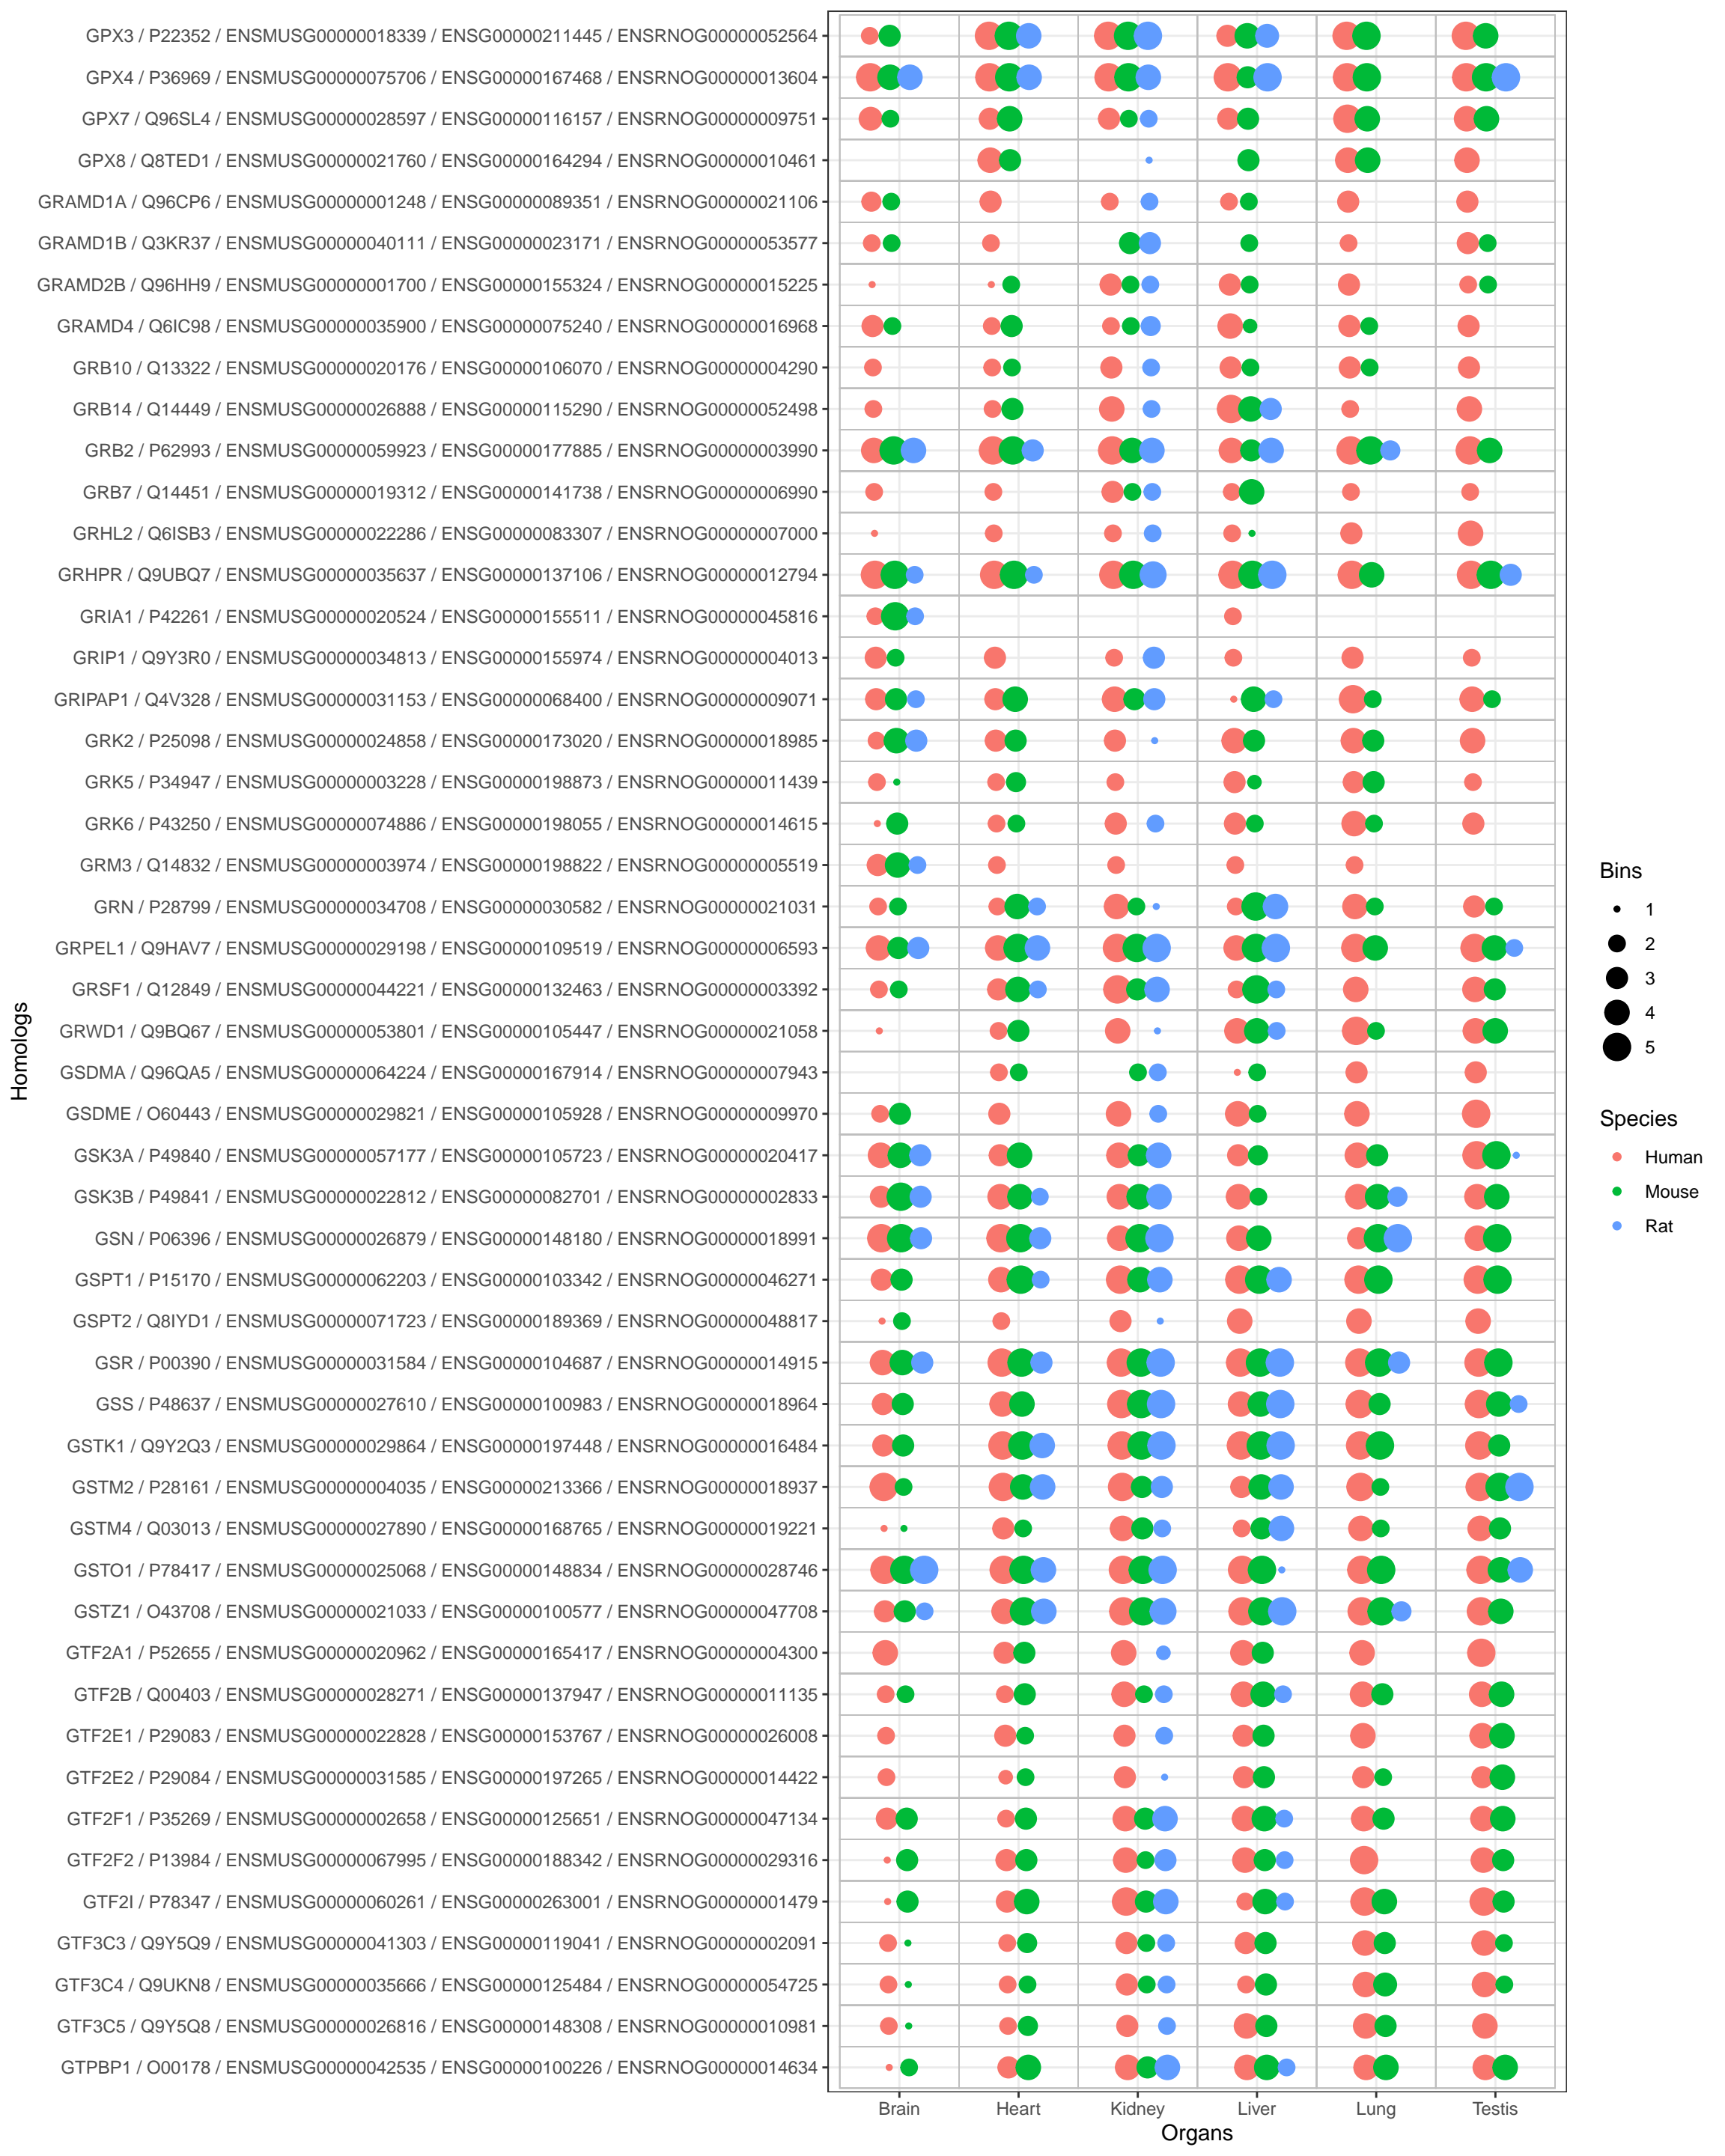

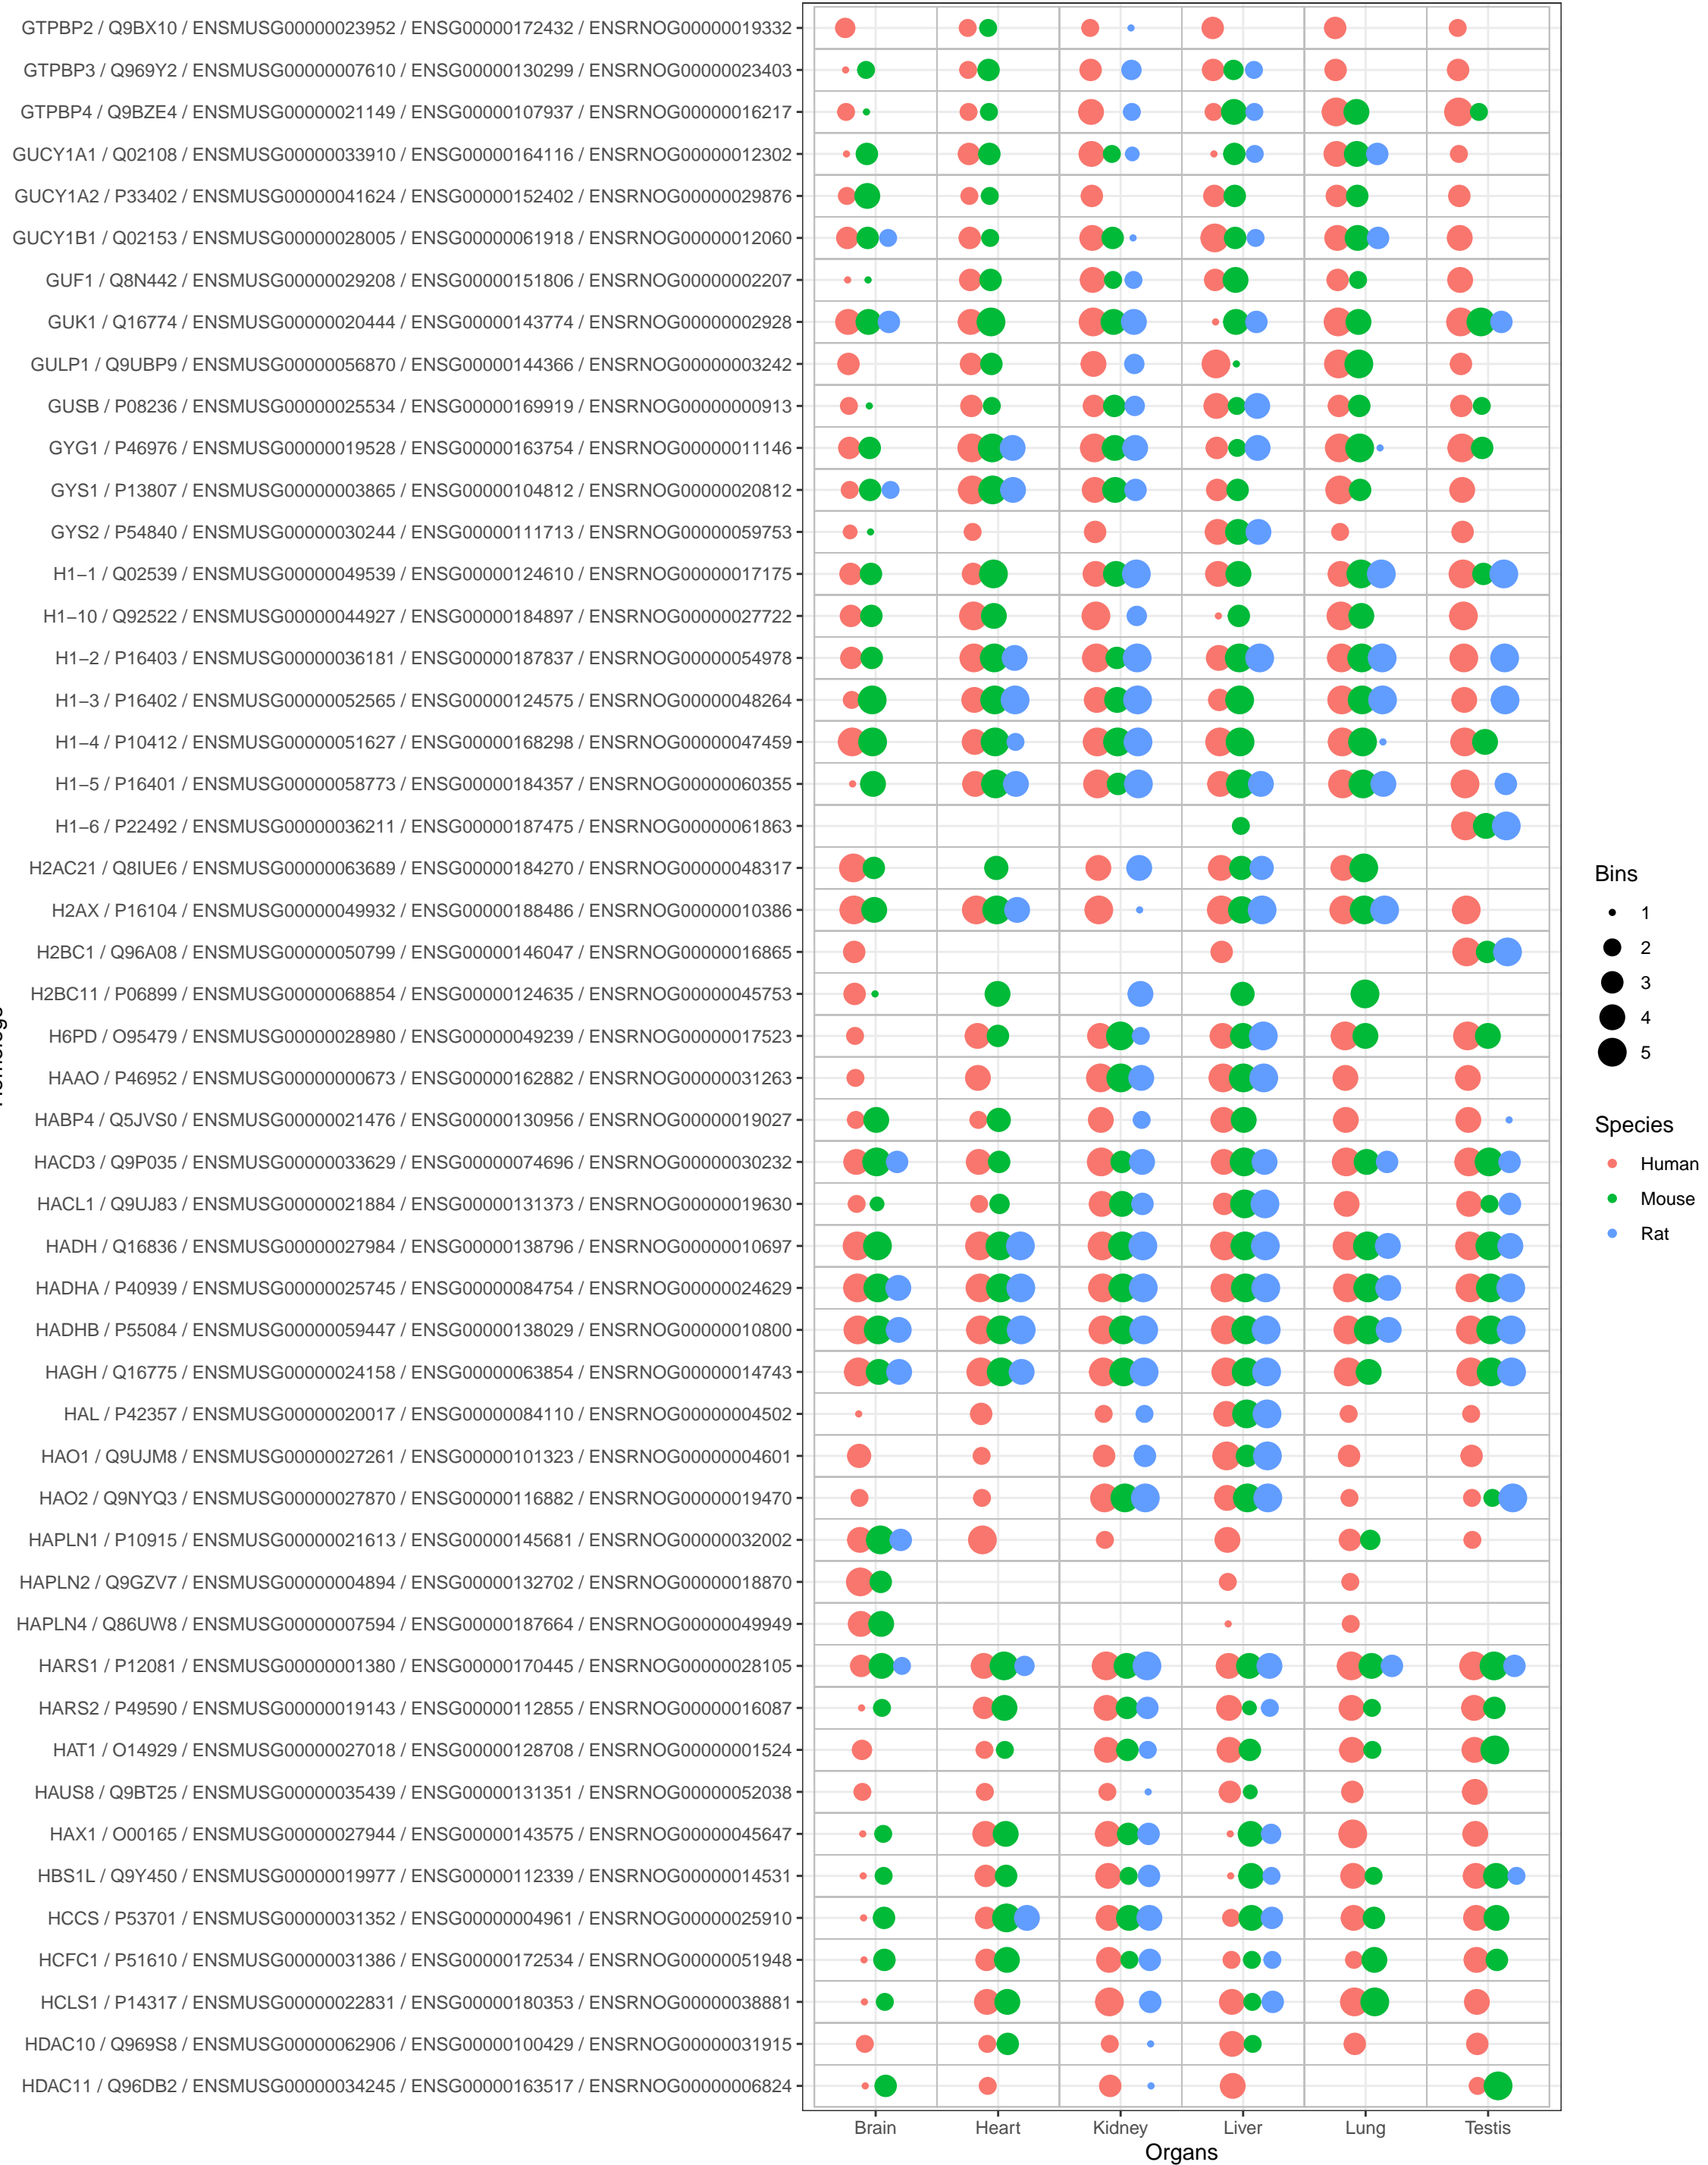

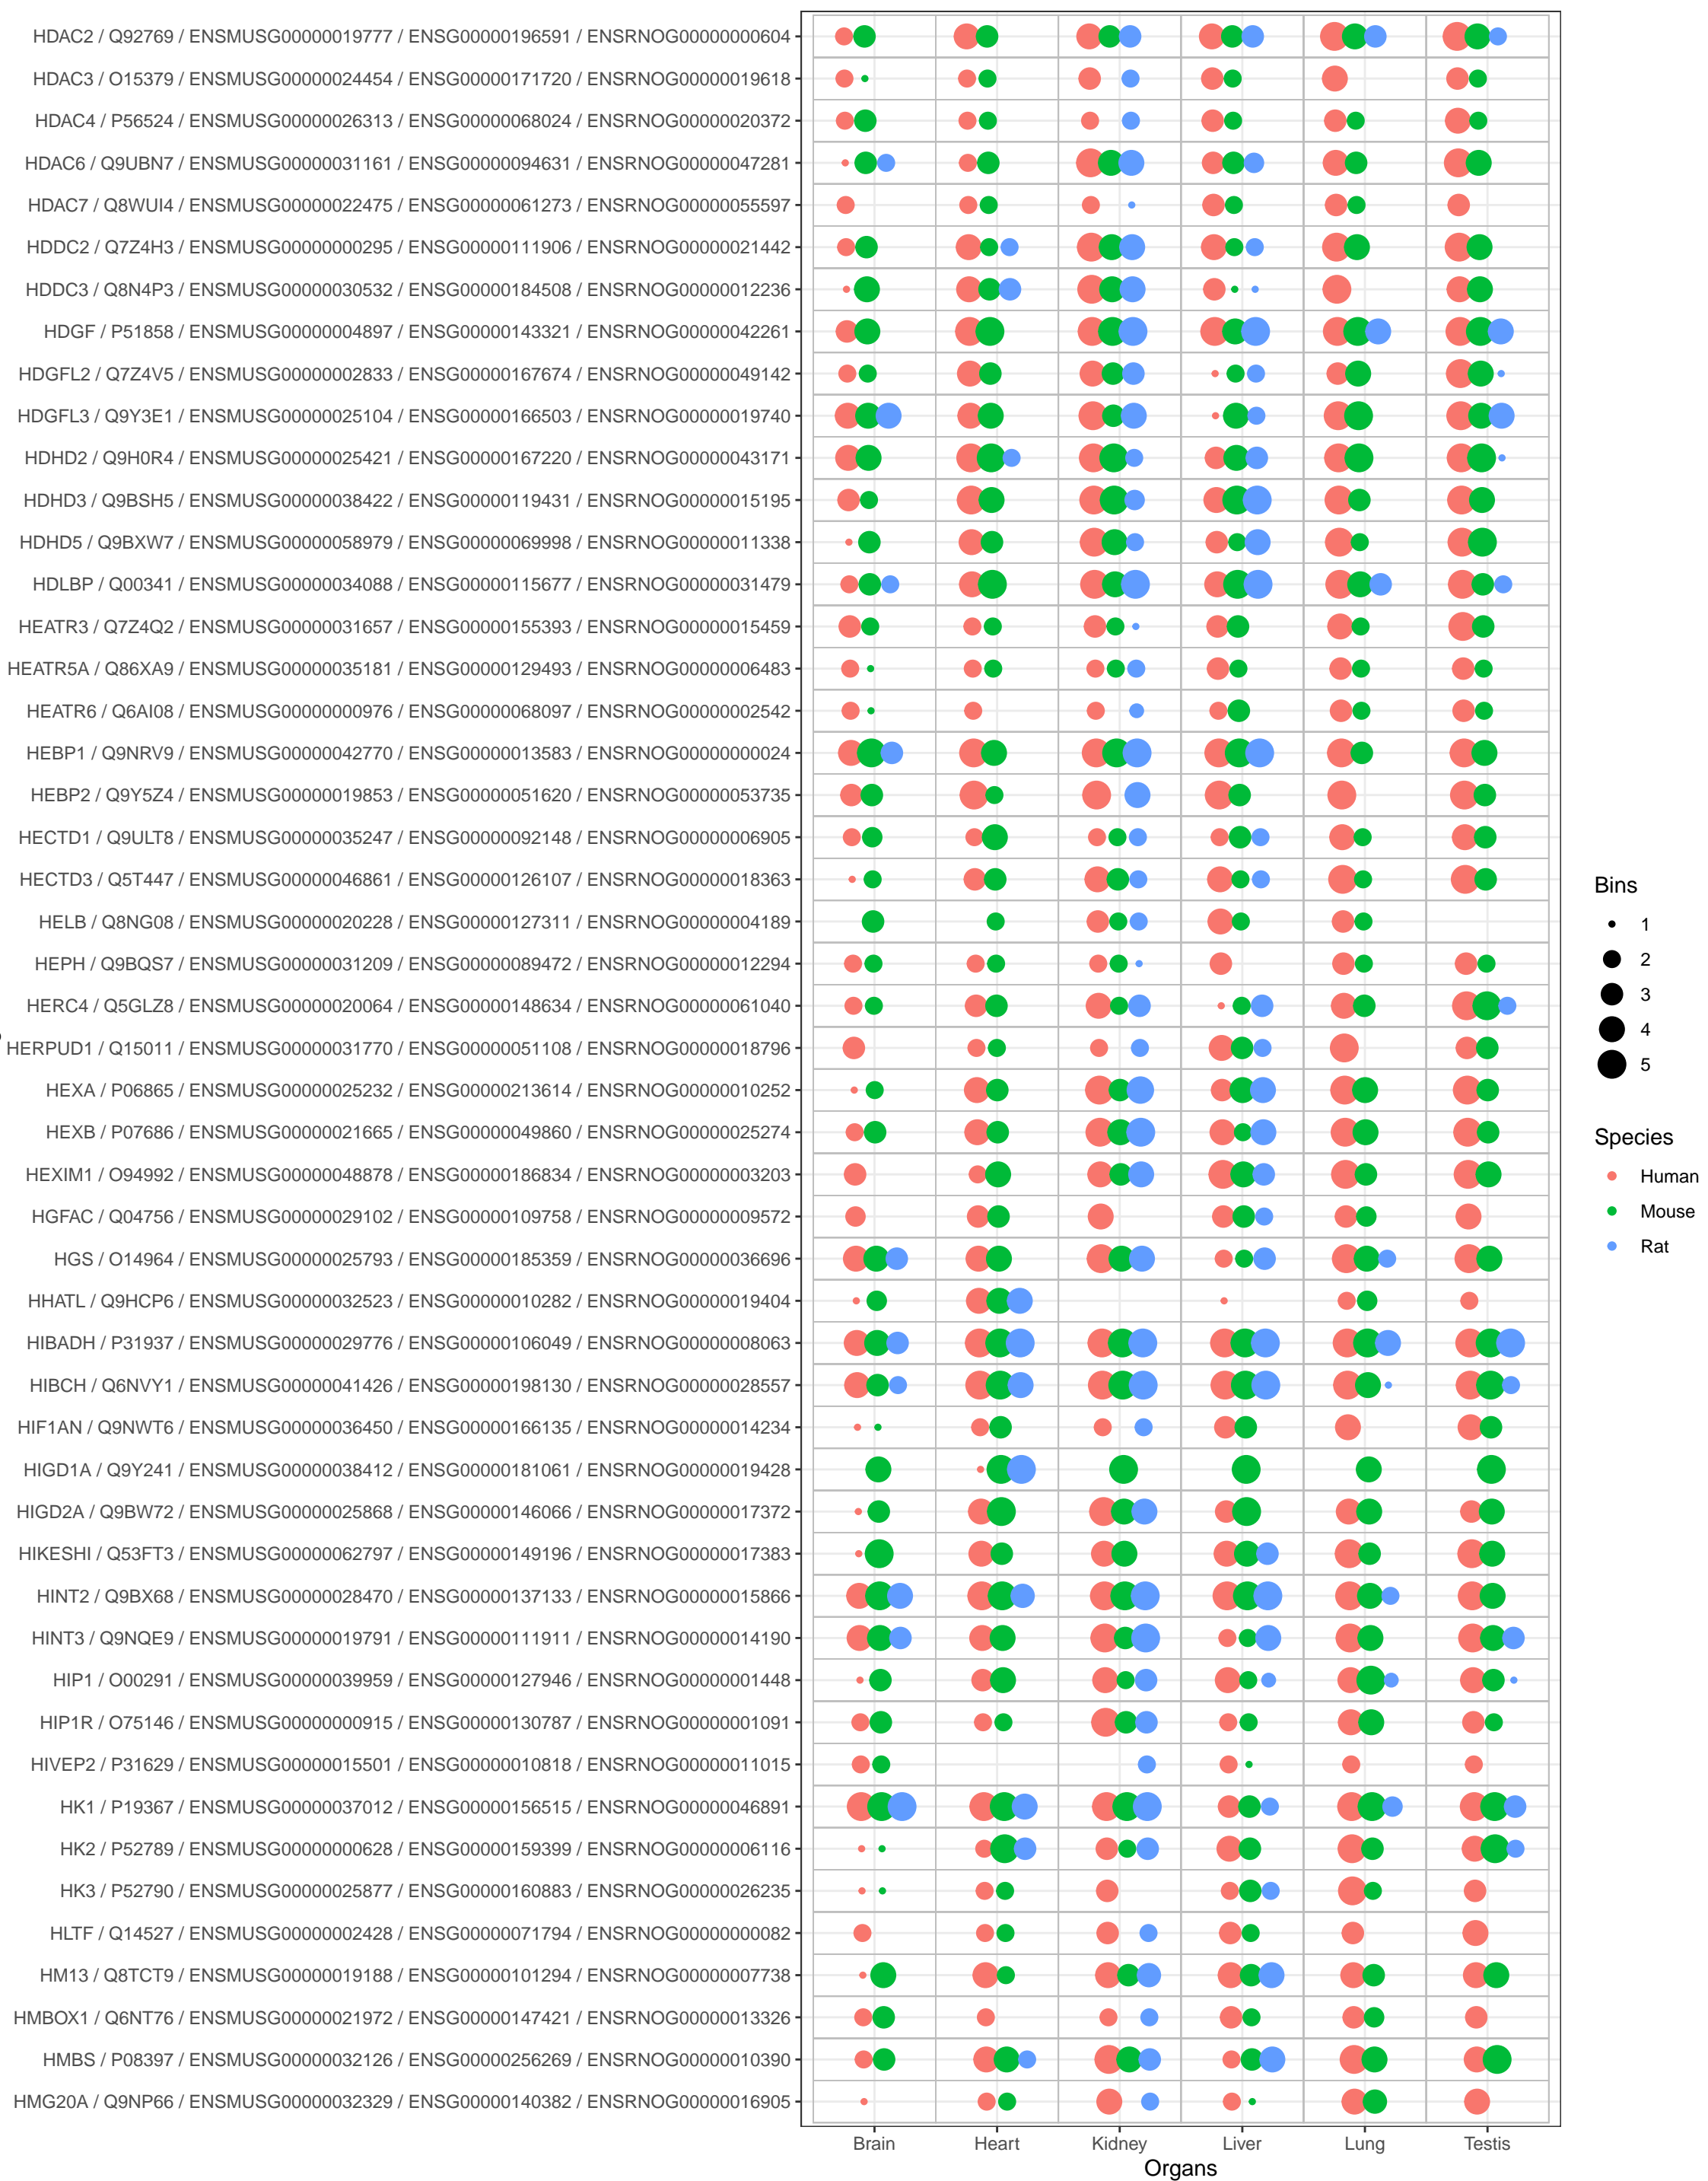

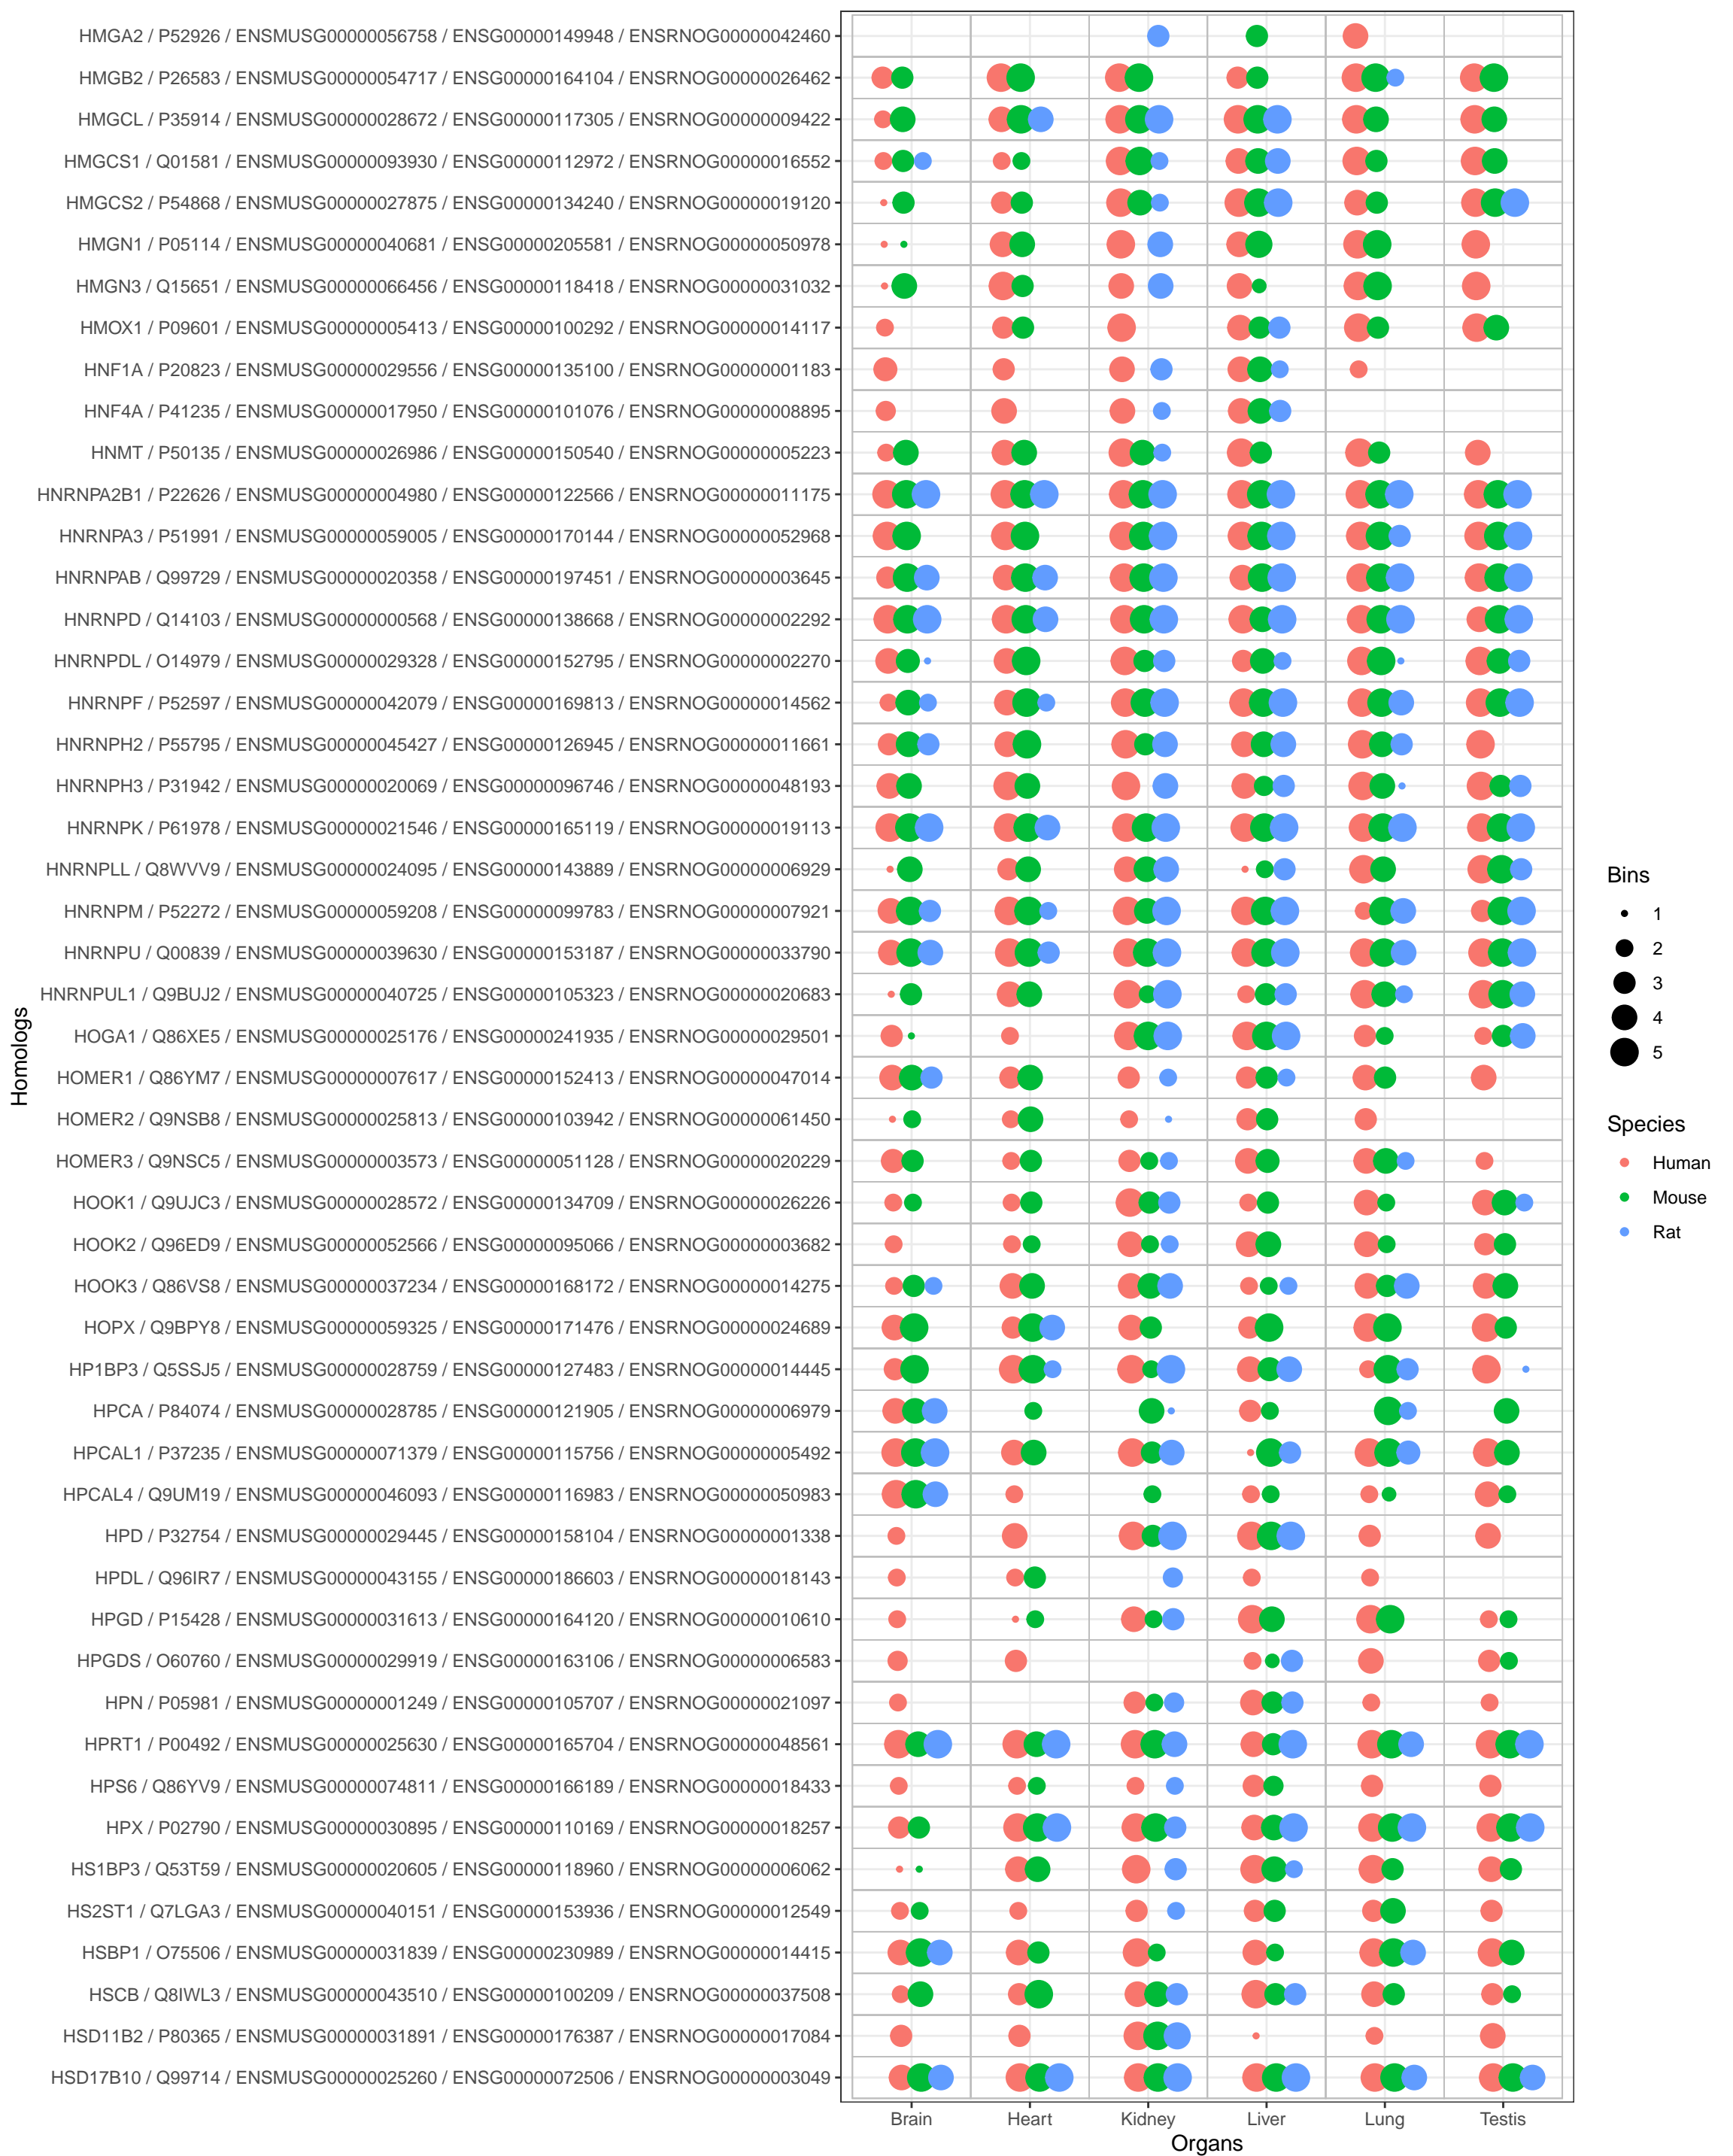

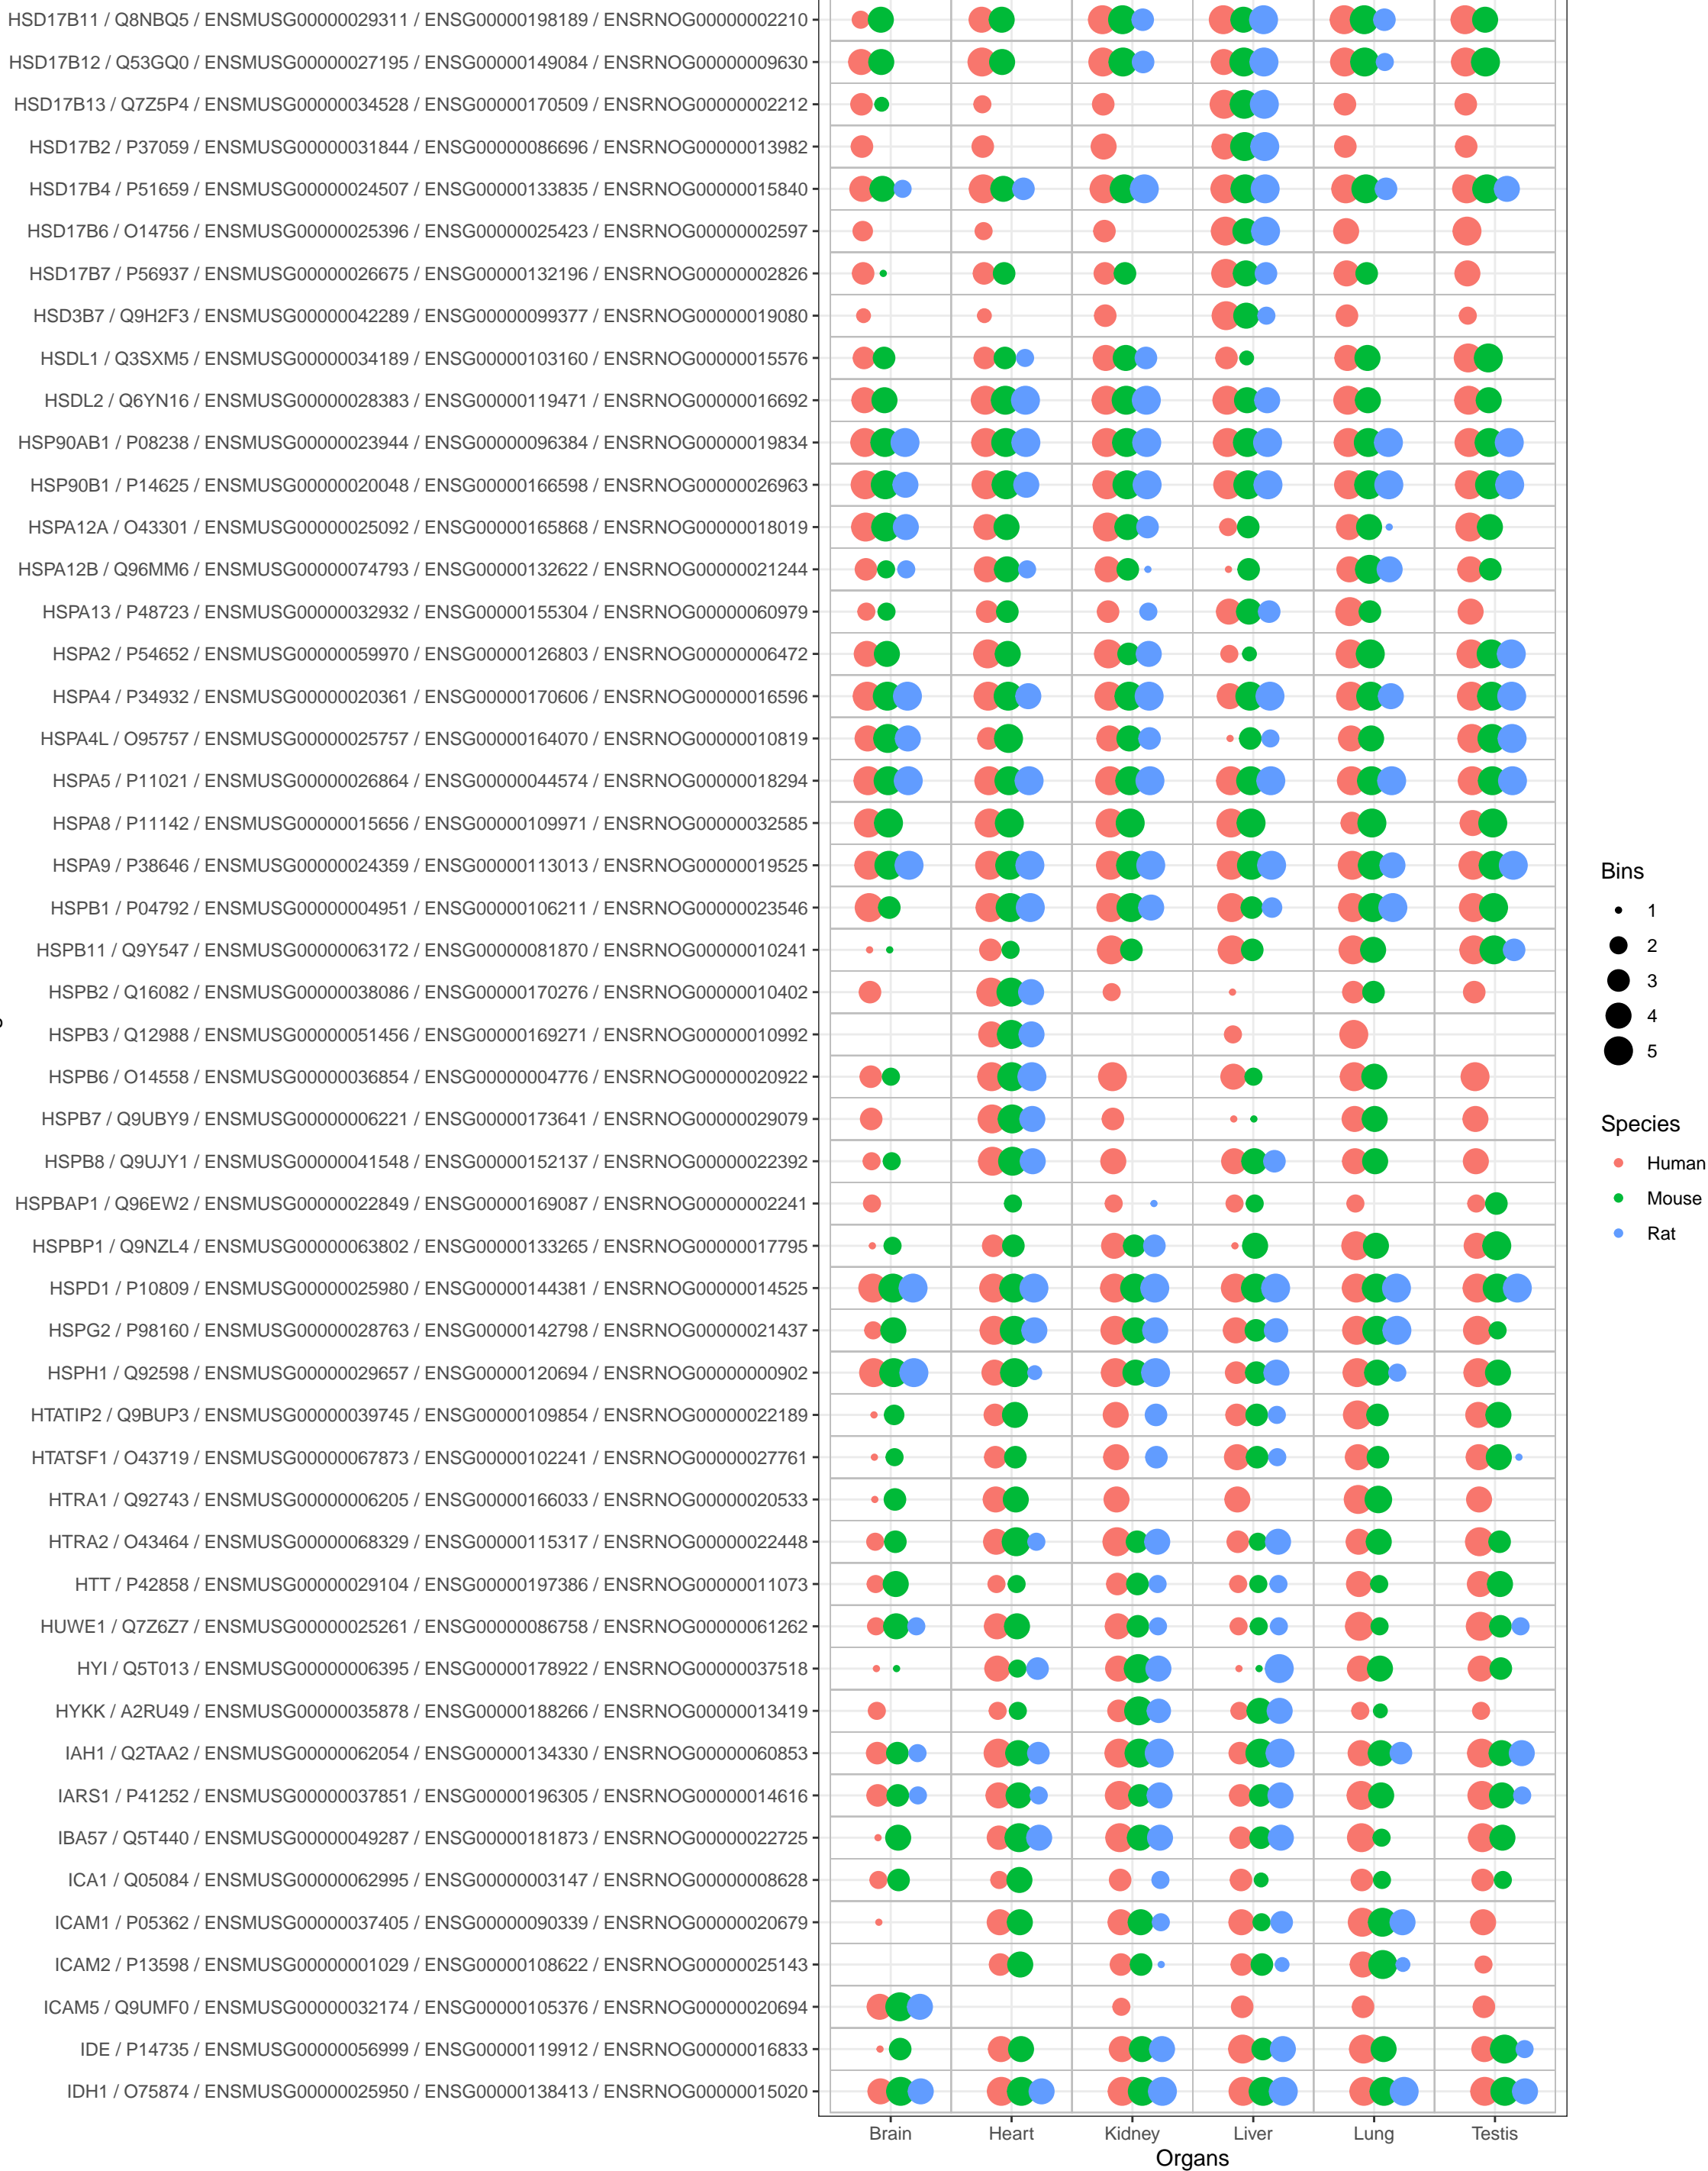



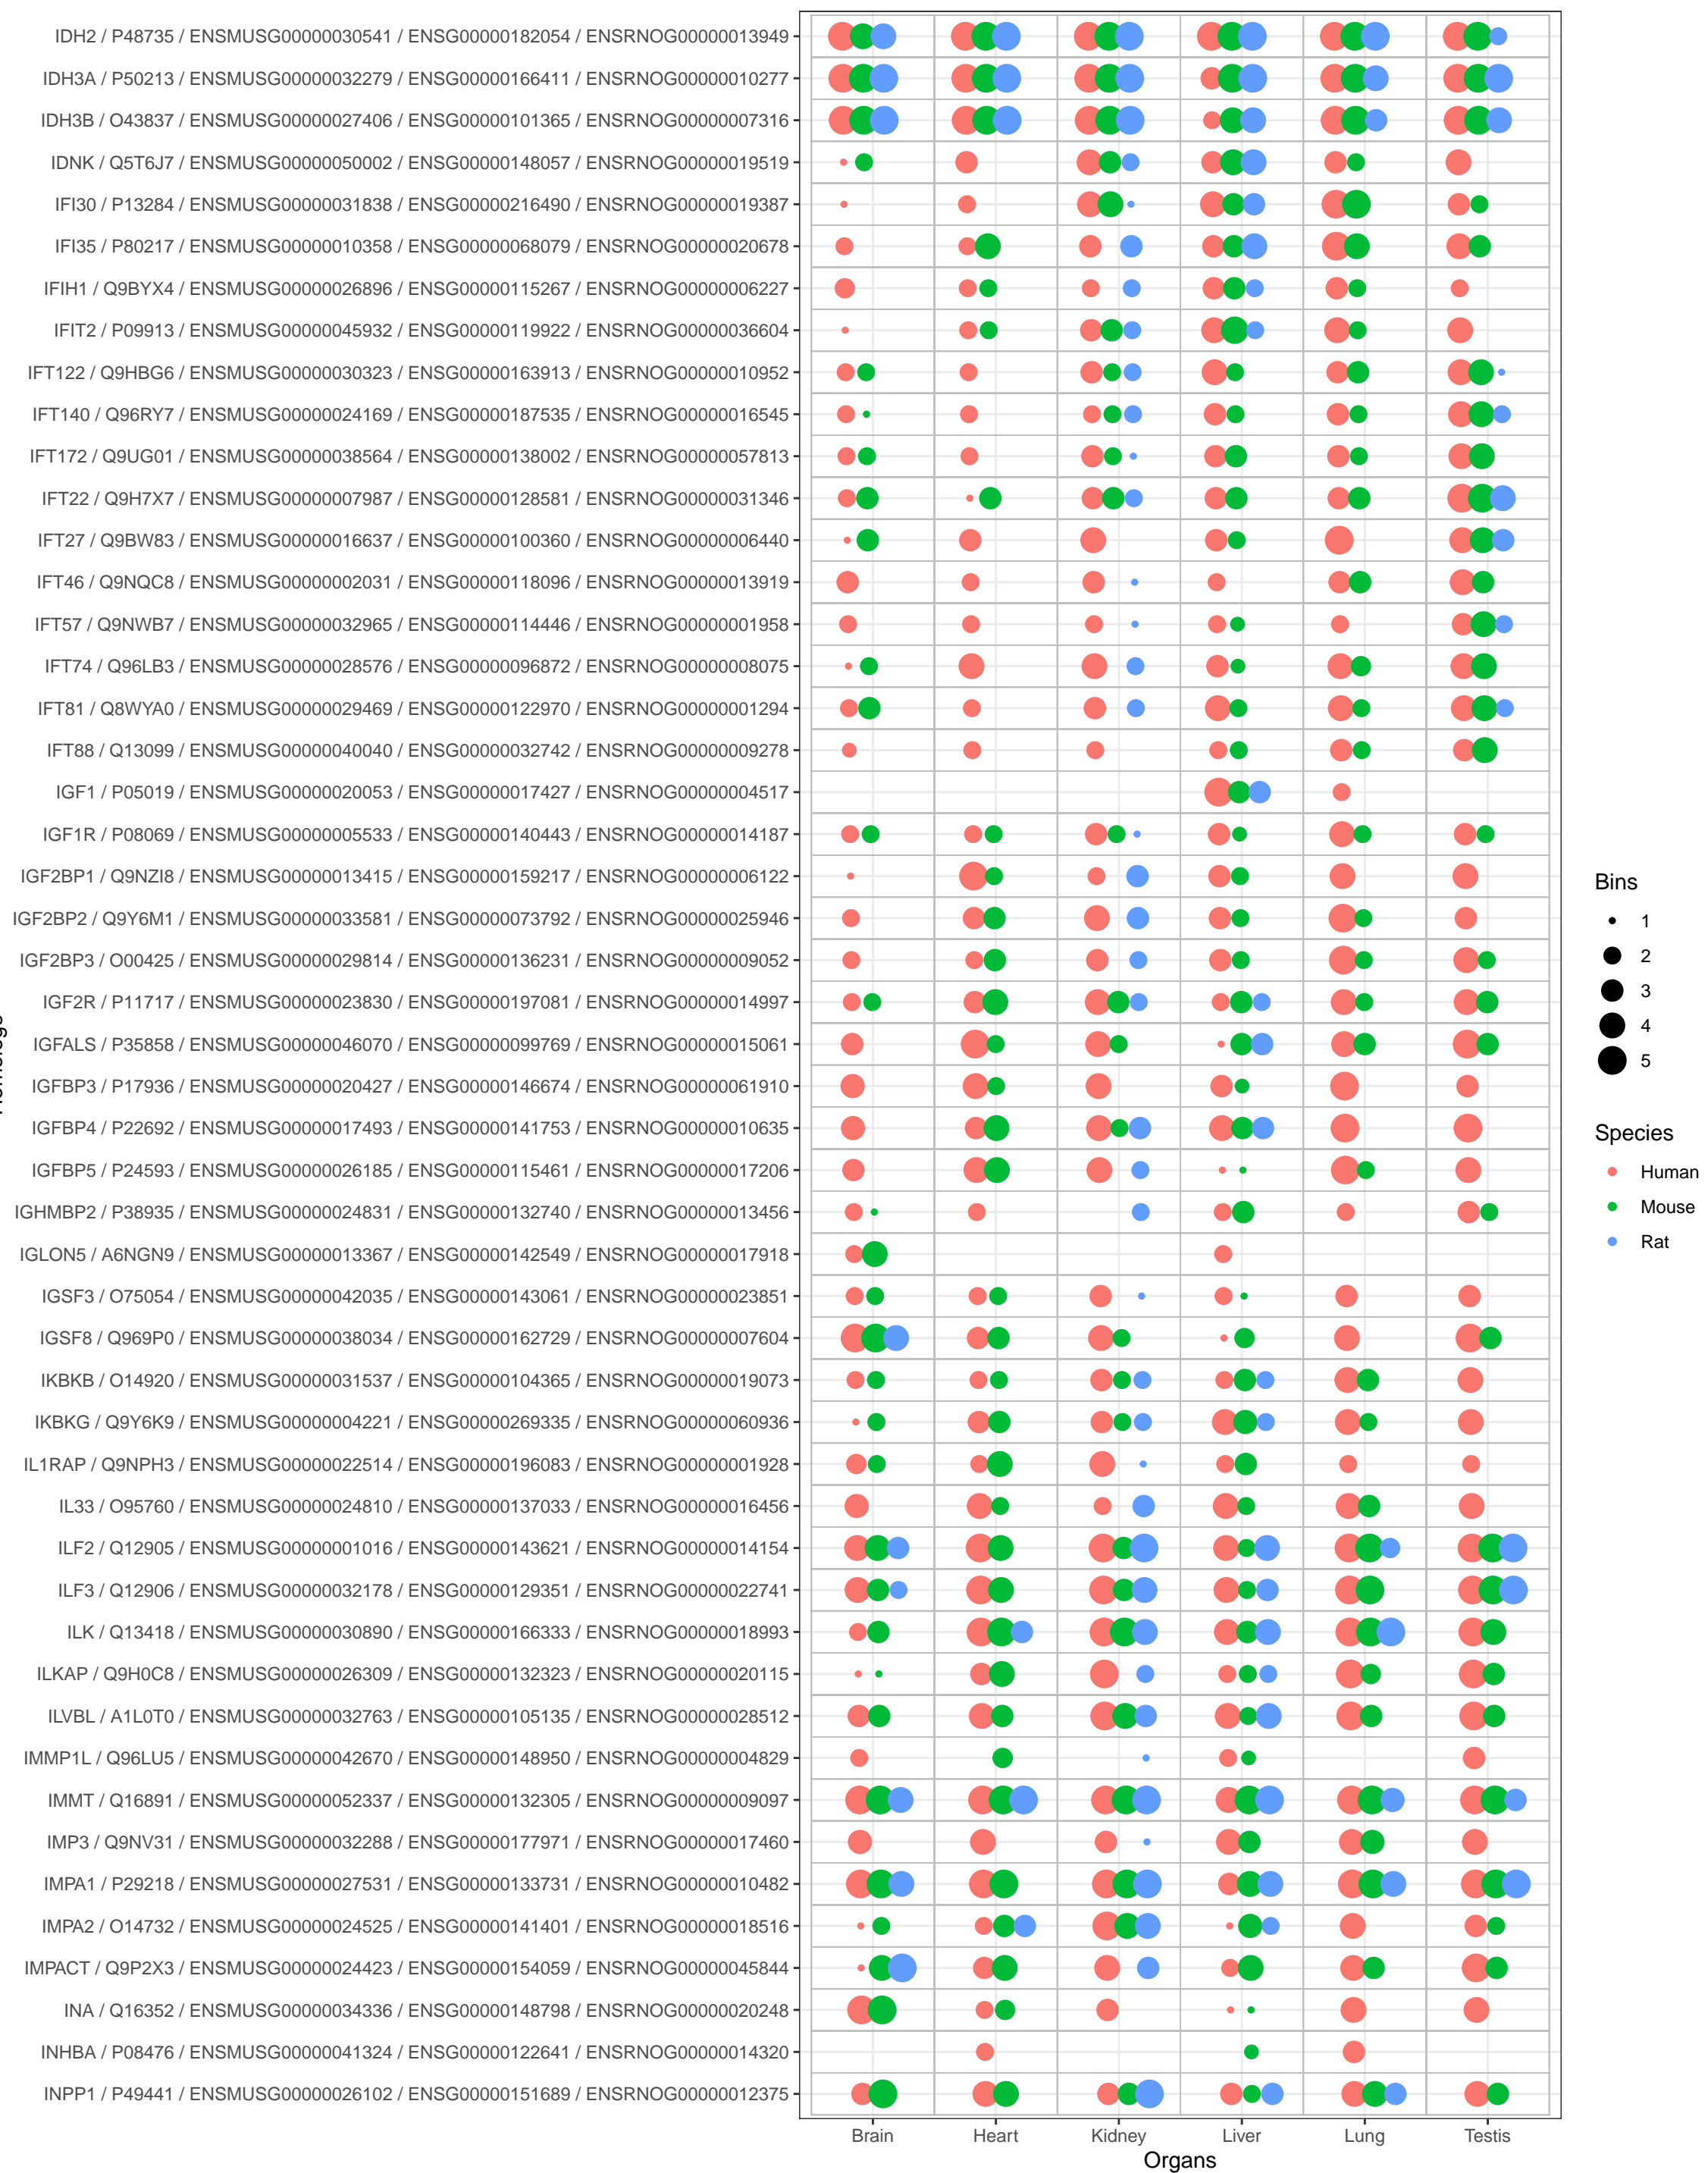

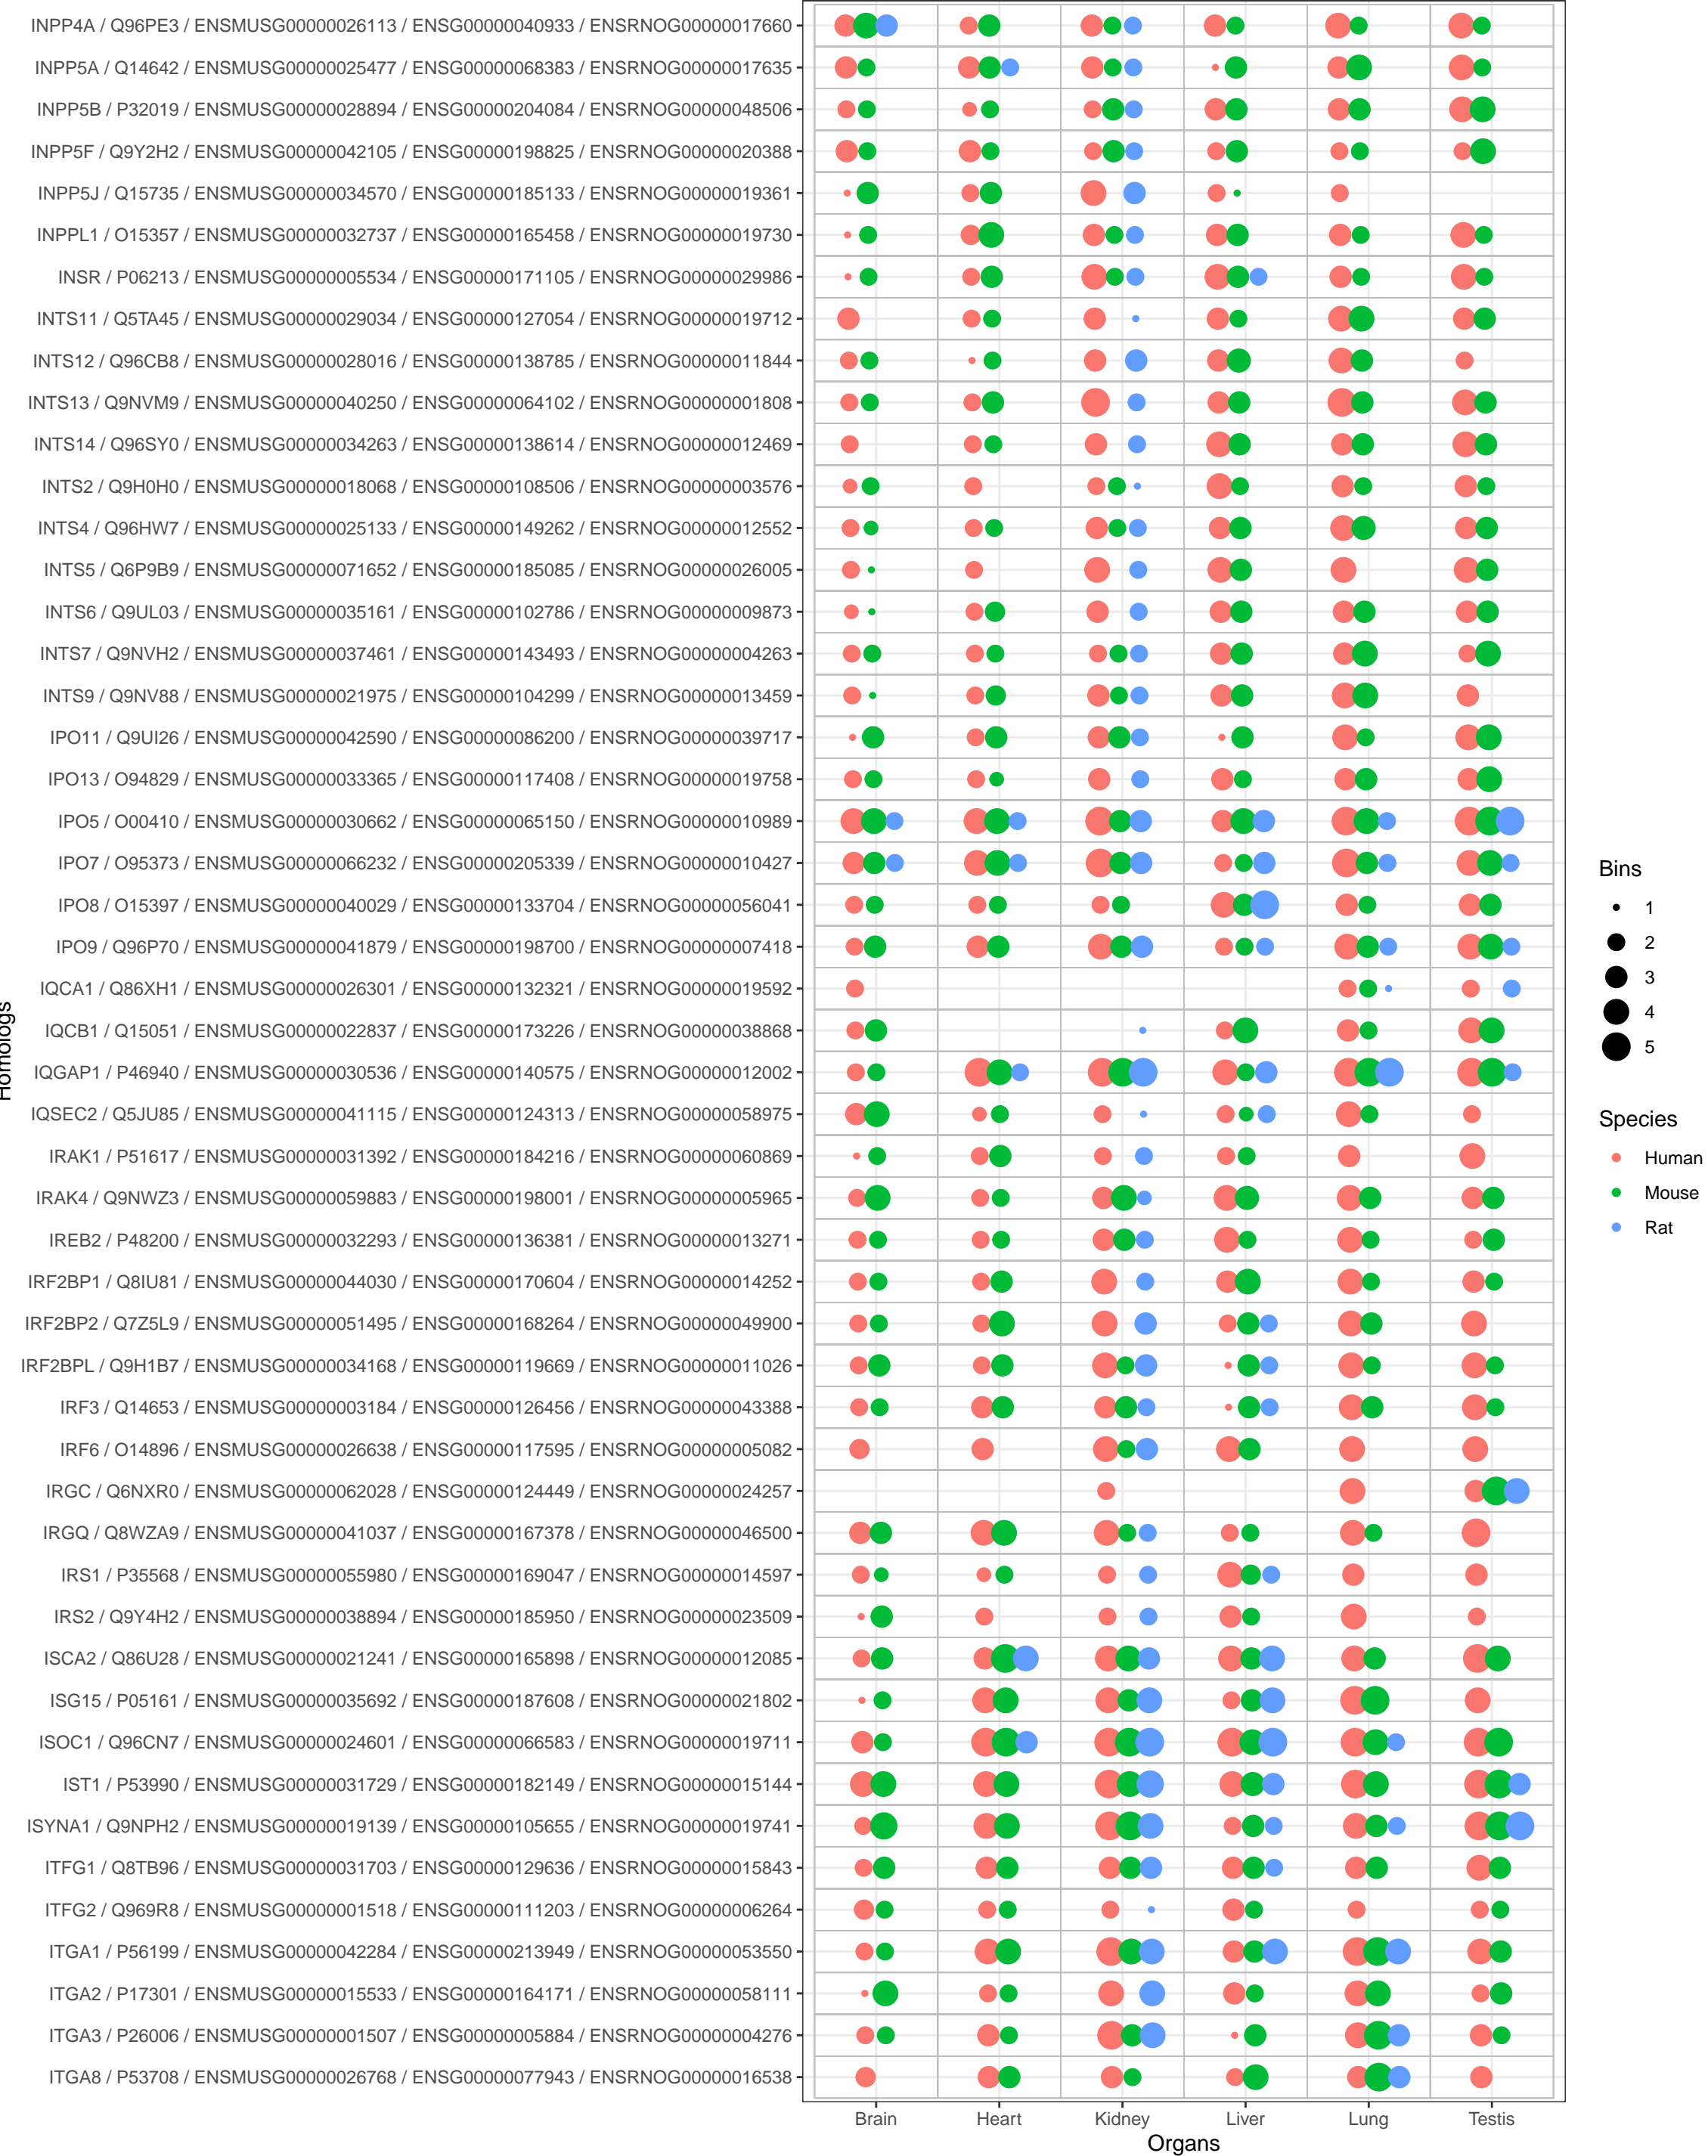

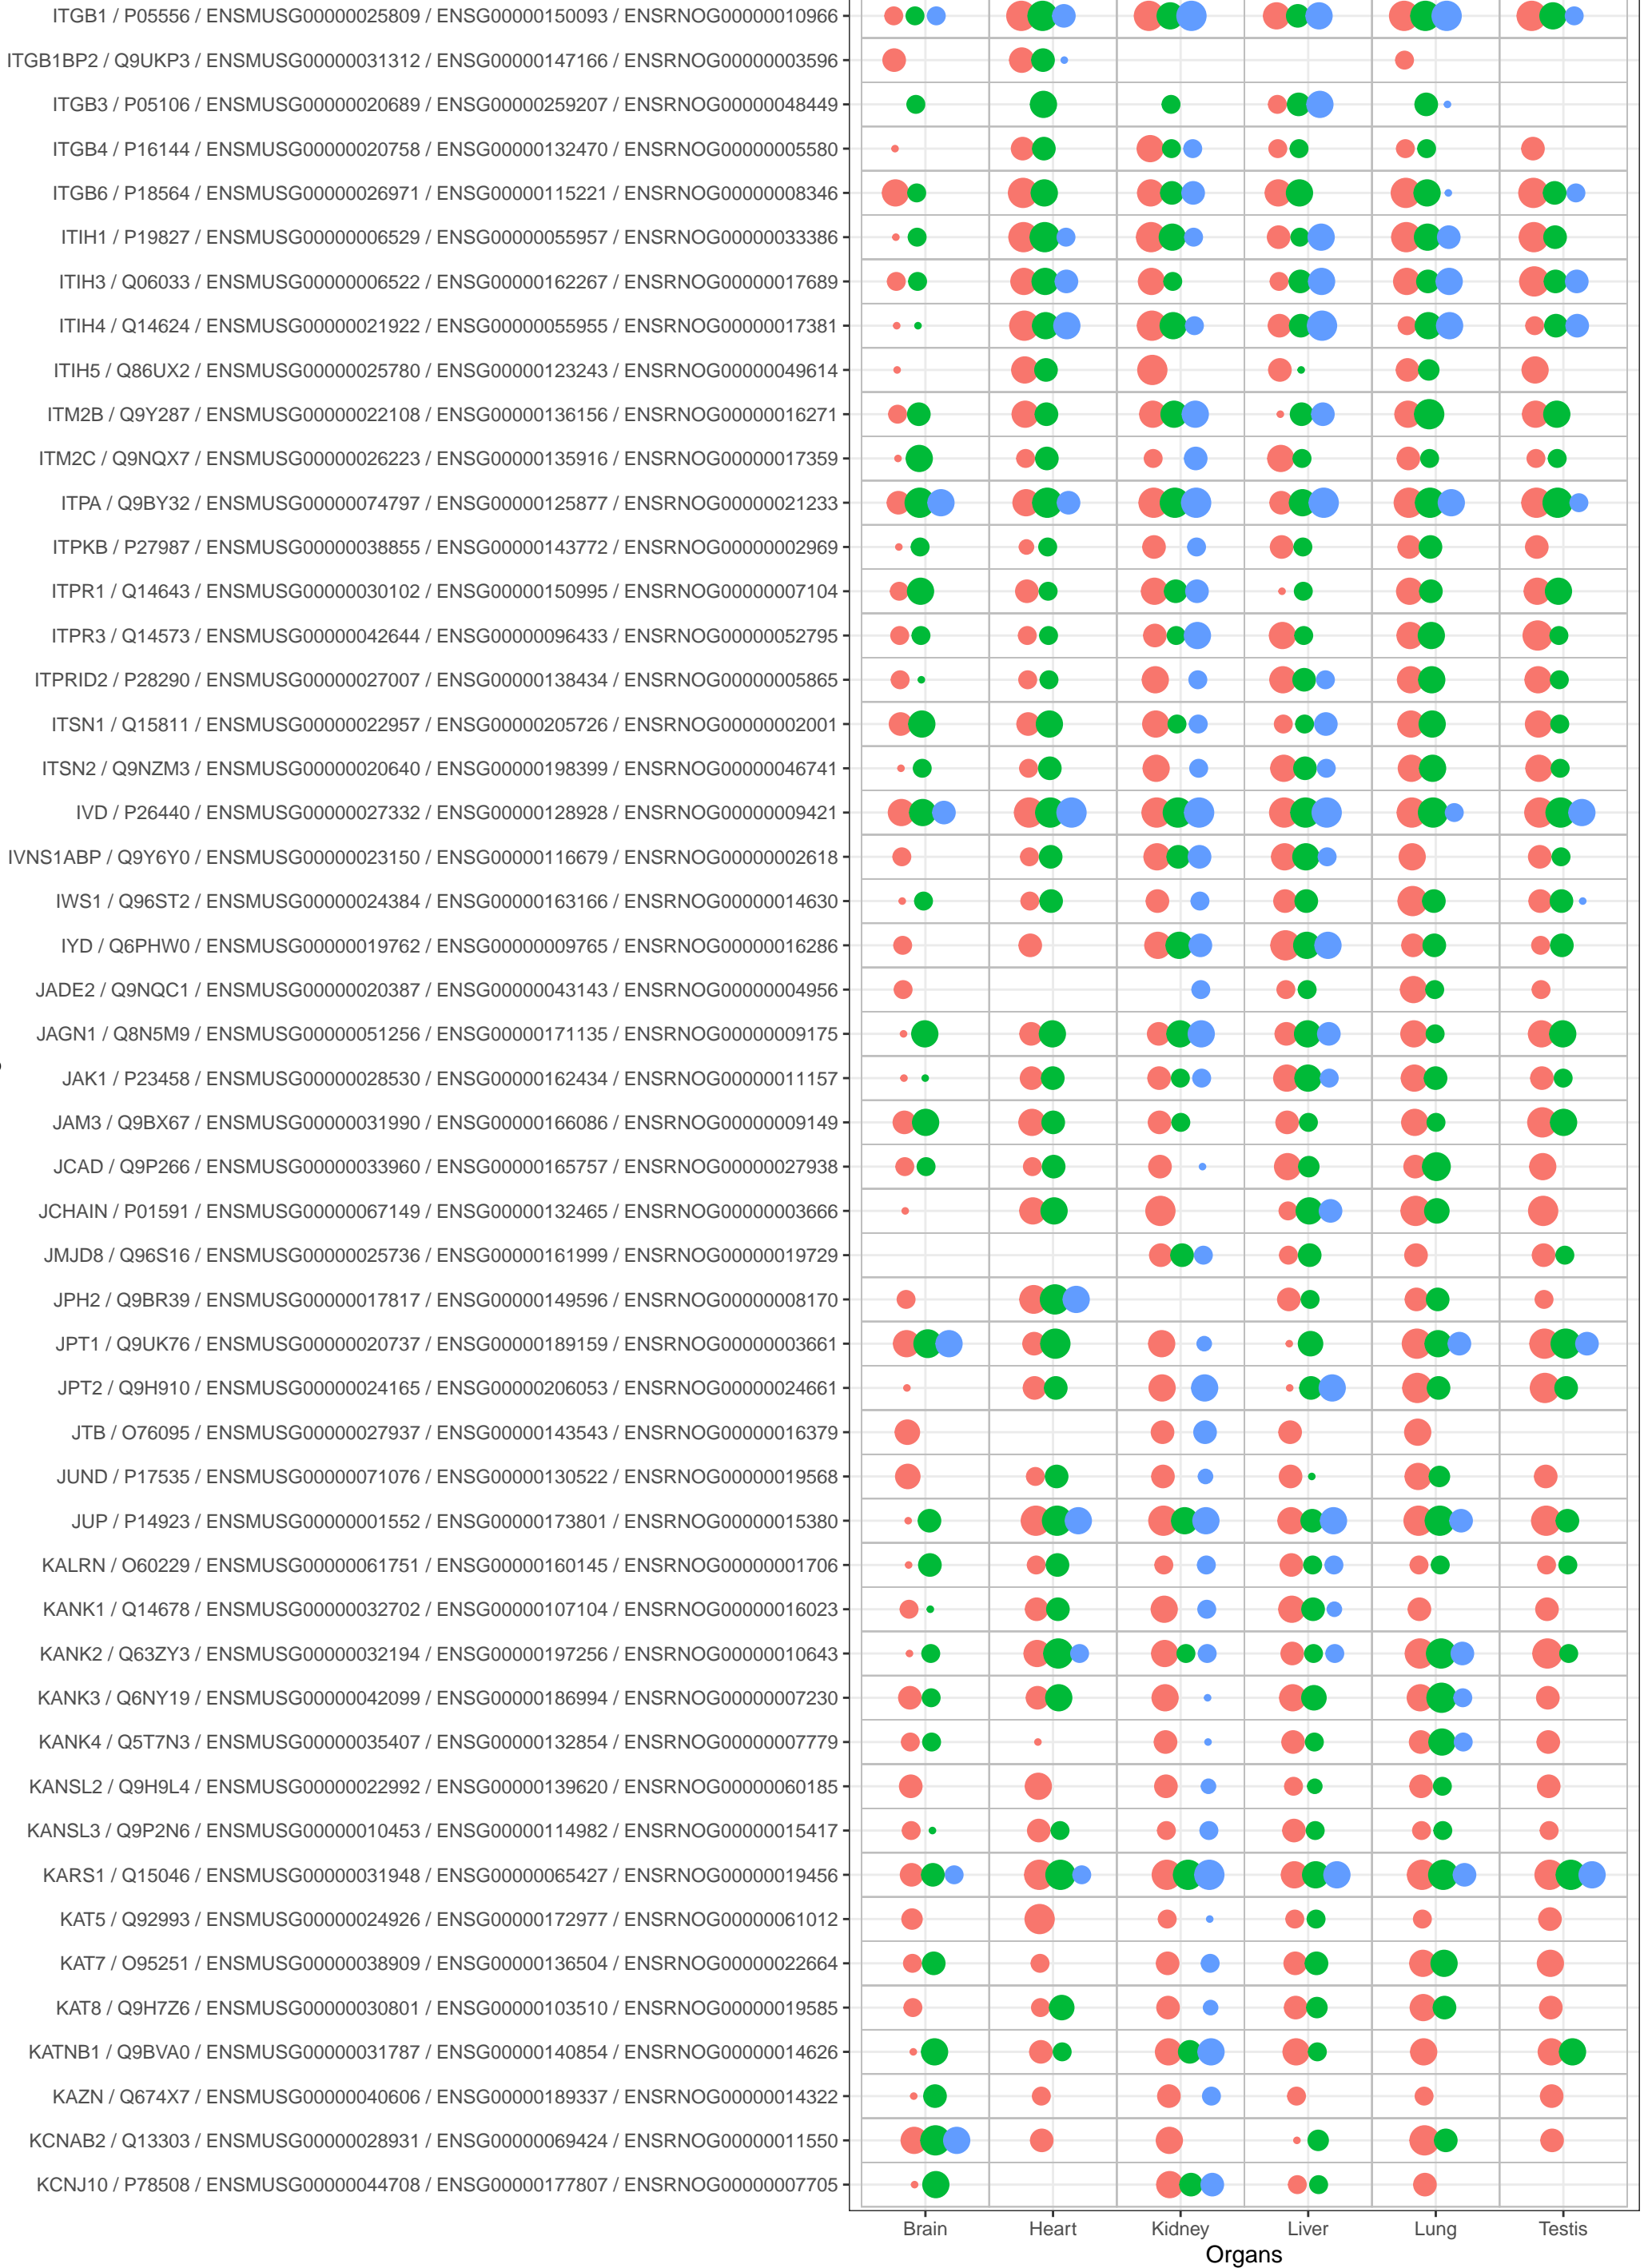

Homologs

Bins

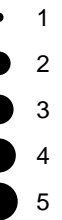

Species

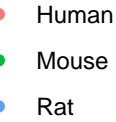

Brain Heart Kidney Liver Lung Testis

Organs

Homologs

KCNJ16 / Q9NPI9 / ENSMUSG00000051497 / ENSG00000153822 / ENSRNOG00000004713

KCNT1 / Q5JUK3 / ENSMUSG00000058740 / ENSG00000107147 / ENSRNOG00000017283

KCTD1 / Q719H9 / ENSMUSG00000036225 / ENSG00000134504 / ENSRNOG00000016467

KCTD10 / Q9H3F6 / ENSMUSG00000001098 / ENSG00000110906 / ENSRNOG00000047896

KCTD6 / Q8NC69 / ENSMUSG00000021752 / ENSG00000168301 / ENSRNOG00000007817

KDELR1 / P24390 / ENSMUSG00000002778 / ENSG00000105438 / ENSRNOG00000021082

KDM2A / Q9Y2K7 / ENSMUSG00000054611 / ENSG00000173120 / ENSRNOG00000019145

KDM3A / Q9Y4C1 / ENSMUSG00000053470 / ENSG00000115548 / ENSRNOG00000007814

KDM4A / O75164 / ENSMUSG00000033326 / ENSG00000066135 / ENSRNOG00000019956

KDM5A / P29375 / ENSMUSG00000030180 / ENSG00000073614 / ENSRNOG00000010591

KDSR / Q06136 / ENSMUSG00000009905 / ENSG00000119537 / ENSRNOG00000002781

KEAP1 / Q14145 / ENSMUSG00000003308 / ENSG00000079999 / ENSRNOG00000020878

KERA / O60938 / ENSMUSG00000019932 / ENSG00000139330 / ENSRNOG00000004635

KHDRBS1 / Q07666 / ENSMUSG00000028790 / ENSG00000121774 / ENSRNOG00000046794

KHDRBS3 / O75525 / ENSMUSG00000022332 / ENSG00000131773 / ENSRNOG00000009539

KHK / P50053 / ENSMUSG00000029162 / ENSG00000138030 / ENSRNOG00000008047

KHSRP / Q92945 / ENSMUSG00000007670 / ENSG00000088247 / ENSRNOG00000047628

KIAA0319L / Q8IZA0 / ENSMUSG00000028830 / ENSG00000142687 / ENSRNOG00000012204

KIAA0513 / O60268 / ENSMUSG00000031824 / ENSG00000135709 / ENSRNOG00000017431

KIAA0930 / Q6ICG6 / ENSMUSG00000036046 / ENSG00000100364 / ENSRNOG00000031269

KIAA1109 / Q2LD37 / ENSMUSG00000037270 / ENSG00000138688 / ENSRNOG00000038436

KIAA1191 / Q96A73 / ENSMUSG00000025871 / ENSG00000122203 / ENSRNOG00000017133

KIAA1522 / Q9P206 / ENSMUSG00000050390 / ENSG00000162522 / ENSRNOG00000008113

KIAA1671 / Q9BY89 / ENSMUSG00000051339 / ENSG00000197077 / ENSRNOG00000052424

KIAA2013 / Q8IYS2 / ENSMUSG00000044496 / ENSG00000116685 / ENSRNOG00000007968

KIDINS220 / Q9ULH0 / ENSMUSG00000036333 / ENSG00000134313 / ENSRNOG00000023176

KIF13A / Q9H1H9 / ENSMUSG00000021375 / ENSG00000137177 / ENSRNOG00000001455

KIF13B / Q9NQT8 / ENSMUSG00000060012 / ENSG00000197892 / ENSRNOG00000013089

KIF1A / Q12756 / ENSMUSG00000014602 / ENSG00000130294 / ENSRNOG00000023993

KIF1B / O60333 / ENSMUSG00000063077 / ENSG00000054523 / ENSRNOG00000057626

KIF1C / O43896 / ENSMUSG00000020821 / ENSG00000129250 / ENSRNOG00000031364

KIF27 / Q86VH2 / ENSMUSG00000060176 / ENSG00000165115 / ENSRNOG00000019257

KIF2C / Q99661 / ENSMUSG00000028678 / ENSG00000142945 / ENSRNOG00000019100

KIF3A / Q9Y496 / ENSMUSG00000018395 / ENSG00000131437 / ENSRNOG00000007515

KIF3B / O15066 / ENSMUSG00000027475 / ENSG00000101350 / ENSRNOG00000010361

KIF5A / Q12840 / ENSMUSG00000074657 / ENSG00000155980 / ENSRNOG00000005299

KIF5B / P33176 / ENSMUSG00000006740 / ENSG00000170759 / ENSRNOG00000017466

KIFBP / Q96EK5 / ENSMUSG00000036955 / ENSG00000198954 / ENSRNOG00000000395

KIFC3 / Q9BVG8 / ENSMUSG00000031788 / ENSG00000140859 / ENSRNOG00000014087

KIN / O60870 / ENSMUSG00000037262 / ENSG00000151657 / ENSRNOG00000026690

KIRREL1 / Q96J84 / ENSMUSG00000041734 / ENSG00000183853 / ENSRNOG00000016408

KIT / P10721 / ENSMUSG00000005672 / ENSG00000157404 / ENSRNOG00000002227

KLC2 / Q9H0B6 / ENSMUSG00000024862 / ENSG00000174996 / ENSRNOG00000020299

KLC3 / Q6P597 / ENSMUSG00000040714 / ENSG00000104892 / ENSRNOG00000018101

KLC4 / Q9NSK0 / ENSMUSG00000003546 / ENSG00000137171 / ENSRNOG00000018168

KLHDC4 / Q8TBB5 / ENSMUSG00000040263 / ENSG00000104731 / ENSRNOG00000018801

KLHDC7A / Q5VTJ3 / ENSMUSG00000078234 / ENSG00000179023 / ENSRNOG00000018867

KLHL22 / Q53GT1 / ENSMUSG00000022750 / ENSG00000099910 / ENSRNOG00000001878

KLHL41 / O60662 / ENSMUSG00000075307 / ENSG00000239474 / ENSRNOG00000007461

KLHL9 / Q9P2J3 / ENSMUSG00000070923 / ENSG00000198642 / ENSRNOG00000006335

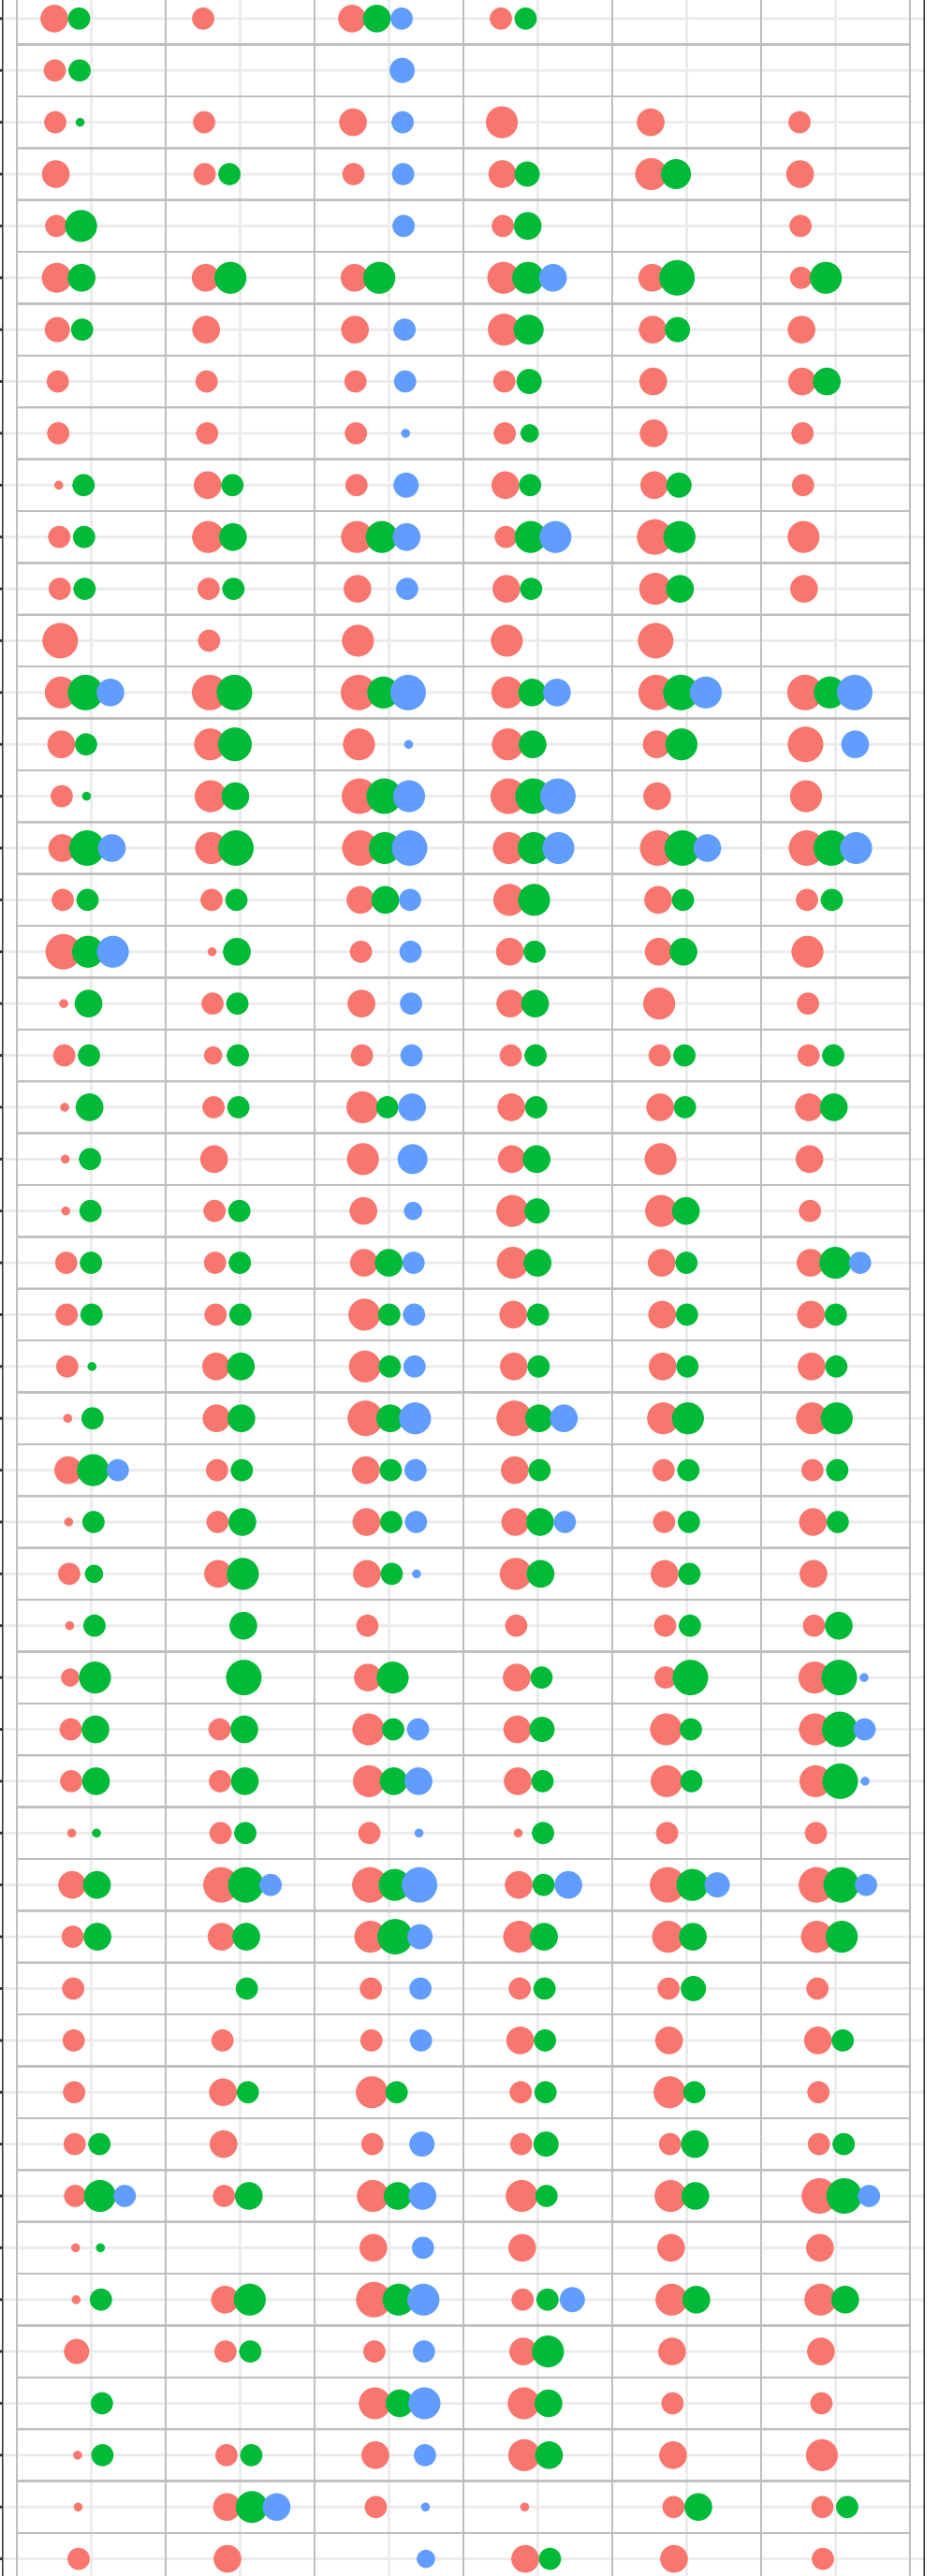

Bins

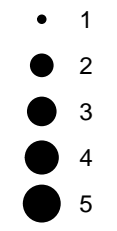

Species

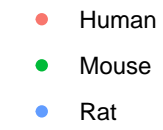

Organs

Homologs

KLKB1 / P03952 / ENSMUSG00000109764 / ENSG00000164344 / ENSRNOG00000014118

KMO / O15229 / ENSMUSG00000039783 / ENSG00000117009 / ENSRNOG00000003709

KNSTRN / Q9Y448 / ENSMUSG00000027331 / ENSG00000128944 / ENSRNOG00000009334

KPNA1 / P52294 / ENSMUSG00000022905 / ENSG00000114030 / ENSRNOG00000051711

KPNA2 / P52292 / ENSMUSG00000018362 / ENSG00000182481 / ENSRNOG00000015329

KPNA3 / O00505 / ENSMUSG00000021929 / ENSG00000102753 / ENSRNOG00000014945

KPNA4 / O00629 / ENSMUSG00000027782 / ENSG00000186432 / ENSRNOG00000010768

KPNB1 / Q14974 / ENSMUSG00000001440 / ENSG00000108424 / ENSRNOG00000009275

KPTN / Q9Y664 / ENSMUSG00000006021 / ENSG00000118162 / ENSRNOG00000001493

KRAS / P01116 / ENSMUSG00000030265 / ENSG00000133703 / ENSRNOG00000009338

KRT1 / P04264 / ENSMUSG00000046834 / ENSG00000167768 / ENSRNOG00000028996

KRT14 / P02533 / ENSMUSG00000045545 / ENSG00000186847 / ENSRNOG00000003899

KRT7 / P08729 / ENSMUSG00000023039 / ENSG00000135480 / ENSRNOG00000008057

KRT8 / P05787 / ENSMUSG00000049382 / ENSG00000170421 / ENSRNOG00000009779

KTN1 / Q86UP2 / ENSMUSG00000021843 / ENSG00000126777 / ENSRNOG00000012255

KYAT3 / Q6YP21 / ENSMUSG00000040213 / ENSG00000137944 / ENSRNOG00000043426

KYNU / Q16719 / ENSMUSG00000026866 / ENSG00000115919 / ENSRNOG00000029993

L1CAM / P32004 / ENSMUSG00000031391 / ENSG00000198910 / ENSRNOG00000061230

L2HGDH / Q9H9P8 / ENSMUSG00000020988 / ENSG00000087299 / ENSRNOG00000004857

L3HYPDH / Q96EM0 / ENSMUSG00000019718 / ENSG00000126790 / ENSRNOG00000004503

LACTB / P83111 / ENSMUSG00000032370 / ENSG00000103642 / ENSRNOG00000018081

LACTB2 / Q53H82 / ENSMUSG00000025937 / ENSG00000147592 / ENSRNOG00000007829

LAD1 / O00515 / ENSMUSG00000041782 / ENSG00000159166 / ENSRNOG00000009144

LAGE3 / Q14657 / ENSMUSG00000015289 / ENSG00000196976 / ENSRNOG00000053456

LAMA1 / P25391 / ENSMUSG00000032796 / ENSG00000101680 / ENSRNOG00000017237

LAMA5 / O15230 / ENSMUSG00000015647 / ENSG00000130702 / ENSRNOG00000053691

LAMB1 / P07942 / ENSMUSG0000002900 / ENSG00000091136 / ENSRNOG00000005678

LAMB2 / P55268 / ENSMUSG00000052911 / ENSG00000172037 / ENSRNOG00000047768

LAMB3 / Q13751 / ENSMUSG00000026639 / ENSG00000196878 / ENSRNOG00000006025

LAMC1 / P11047 / ENSMUSG00000026478 / ENSG00000135862 / ENSRNOG00000002680

LAMC2 / Q13753 / ENSMUSG00000026479 / ENSG00000058085 / ENSRNOG00000002667

LAMP1 / P11279 / ENSMUSG00000031447 / ENSG00000185896 / ENSRNOG00000019629

LAMTOR2 / Q9Y2Q5 / ENSMUSG00000028062 / ENSG00000116586 / ENSRNOG00000019908

LAMTOR3 / Q9UHA4 / ENSMUSG00000091512 / ENSG00000109270 / ENSRNOG00000010552

LAMTOR4 / Q0VGL1 / ENSMUSG00000050552 / ENSG00000188186 / ENSRNOG00000027028

LAMTOR5 / O43504 / ENSMUSG00000087260 / ENSG00000134248 / ENSRNOG00000018186

LANCL2 / Q9NS86 / ENSMUSG00000062190 / ENSG00000132434 / ENSRNOG00000006810

LAP3 / P28838 / ENSMUSG00000039682 / ENSG00000002549 / ENSRNOG00000003289

LARP1B / Q659C4 / ENSMUSG00000025762 / ENSG00000138709 / ENSRNOG00000038366

LARP7 / Q4G0J3 / ENSMUSG00000027968 / ENSG00000174720 / ENSRNOG00000048989

LARS1 / Q9P2J5 / ENSMUSG00000024493 / ENSG00000133706 / ENSRNOG00000018304

LARS2 / Q15031 / ENSMUSG00000035202 / ENSG00000011376 / ENSRNOG00000004760

LASP1 / Q14847 / ENSMUSG00000038366 / ENSG00000002834 / ENSRNOG00000004132

LCAT / P04180 / ENSMUSG00000035237 / ENSG00000213398 / ENSRNOG00000019573

LCLAT1 / Q6UWP7 / ENSMUSG00000054469 / ENSG00000172954 / ENSRNOG00000034026

LCMT1 / Q9UIC8 / ENSMUSG00000030763 / ENSG00000205629 / ENSRNOG00000014565

LCP1 / P13796 / ENSMUSG00000021998 / ENSG00000136167 / ENSRNOG00000010319

LDAH / Q9H6V9 / ENSMUSG00000037669 / ENSG00000118961 / ENSRNOG00000021475

LDB3 / O75112 / ENSMUSG00000021798 / ENSG00000122367 / ENSRNOG000000059166

LDHC / P07864 / ENSMUSG00000030851 / ENSG00000166796 / ENSRNOG00000013103

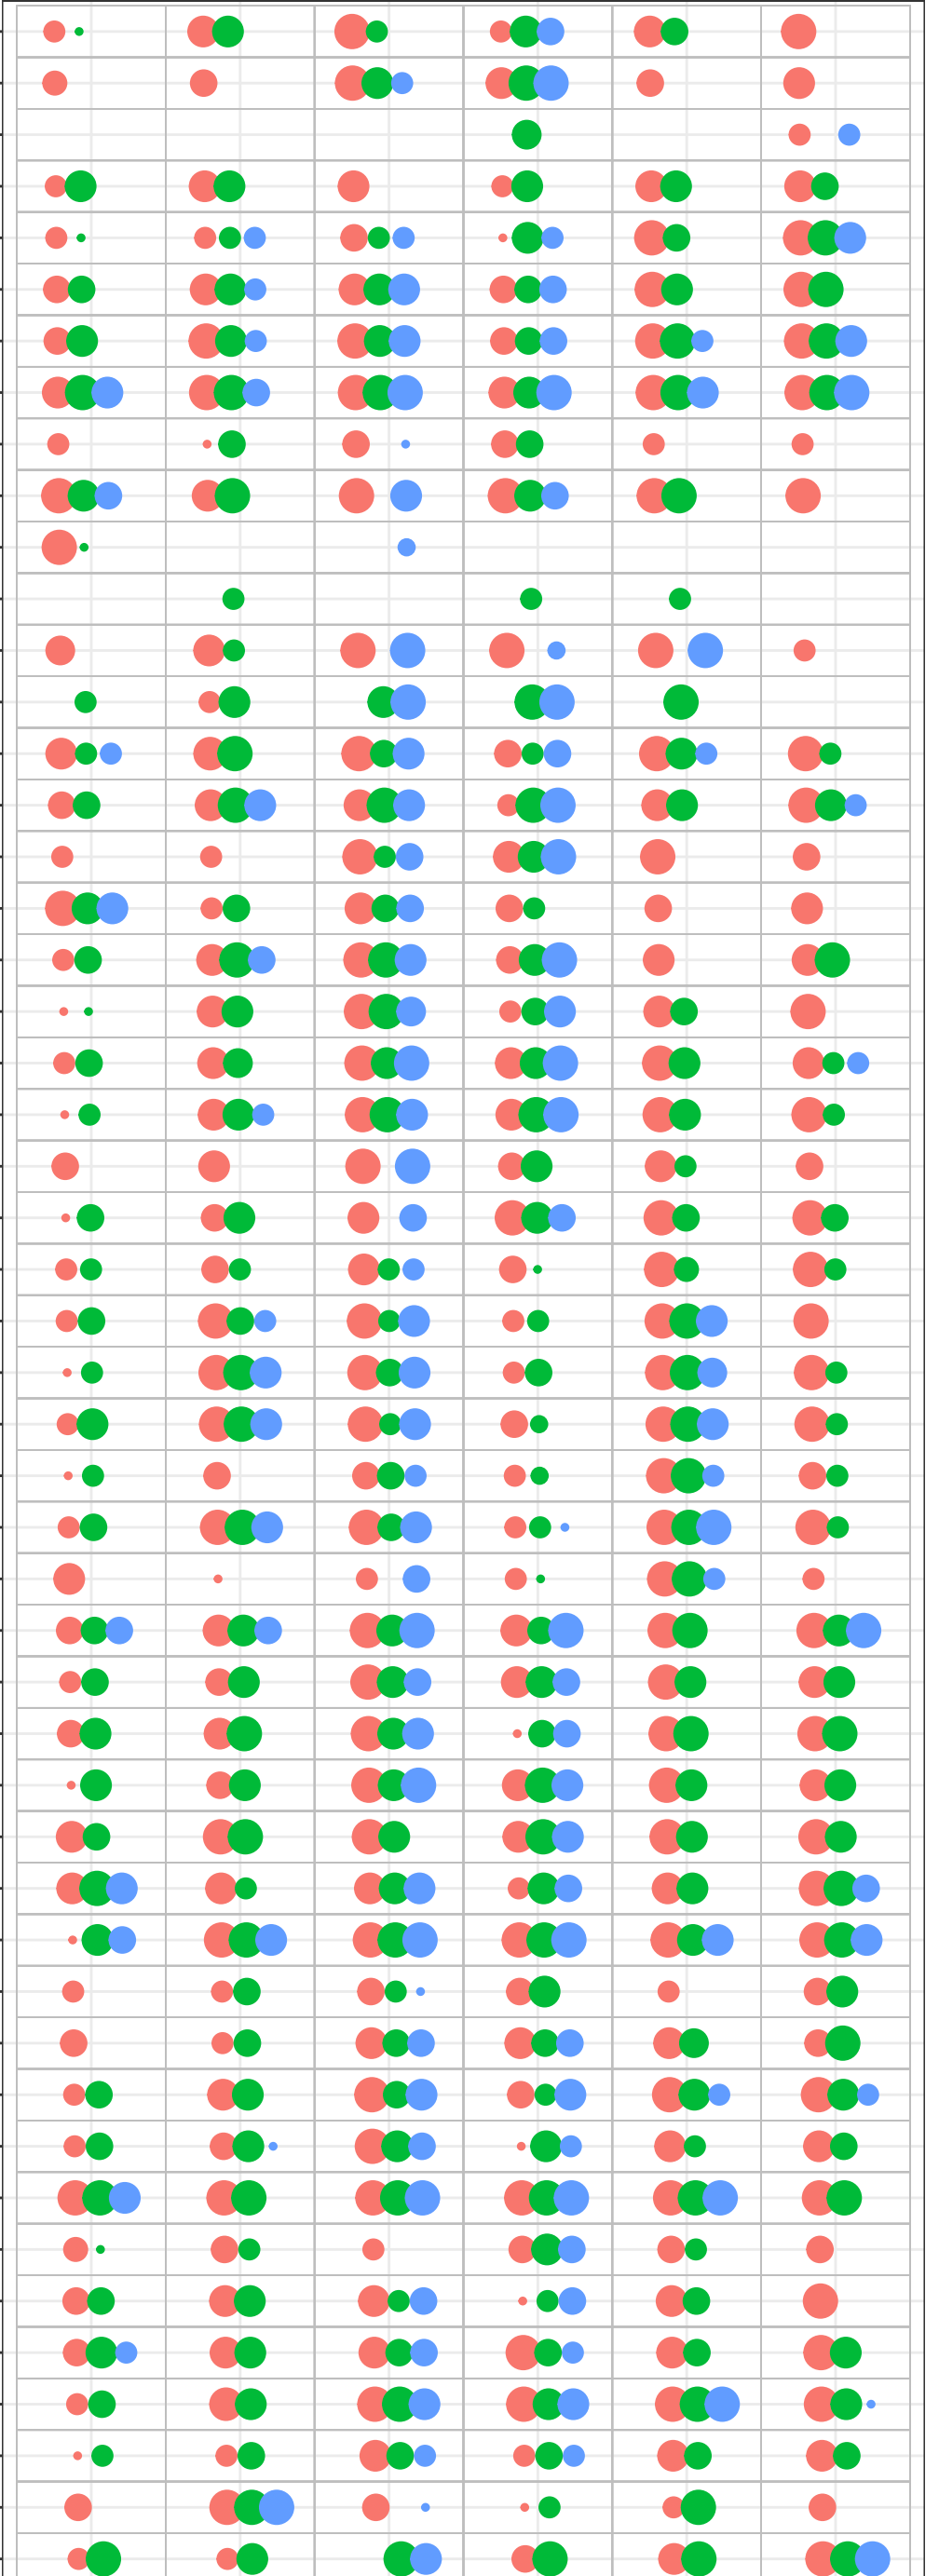

Bins

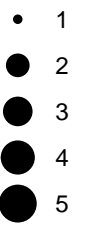

Species

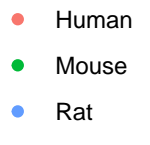Brain Heart Kidney Liver Lung Testis  
Organs

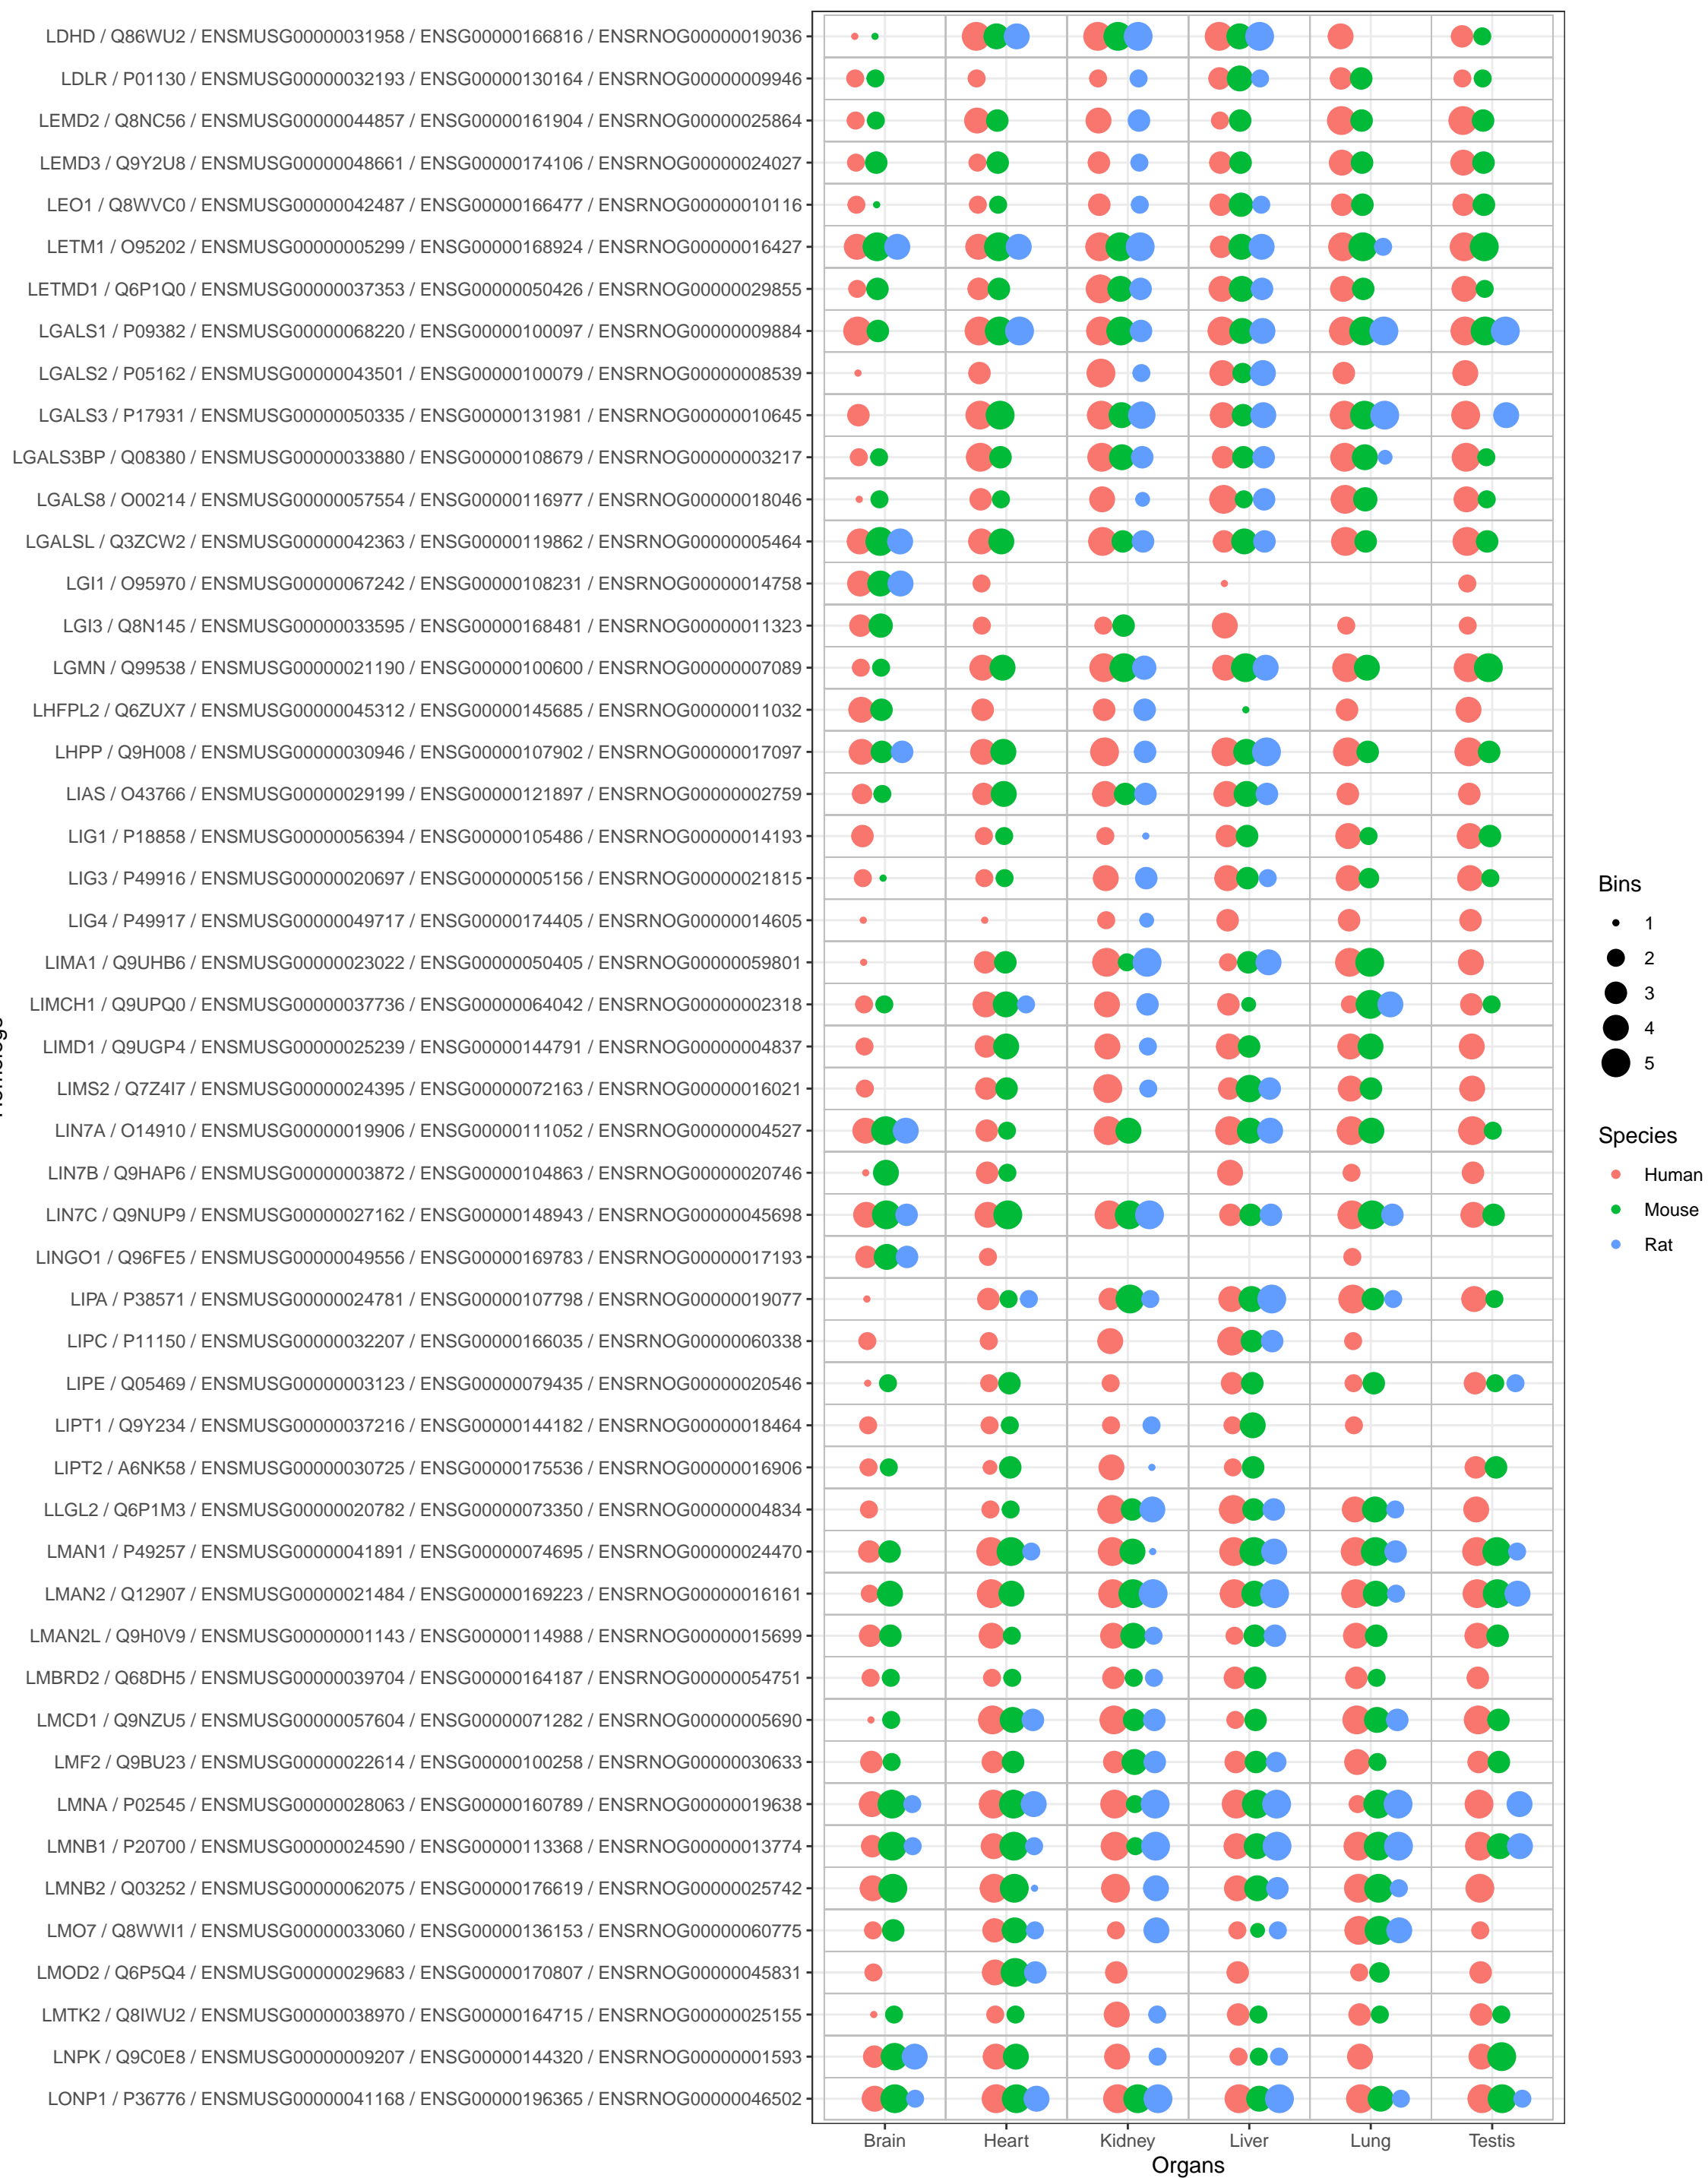

Homologs

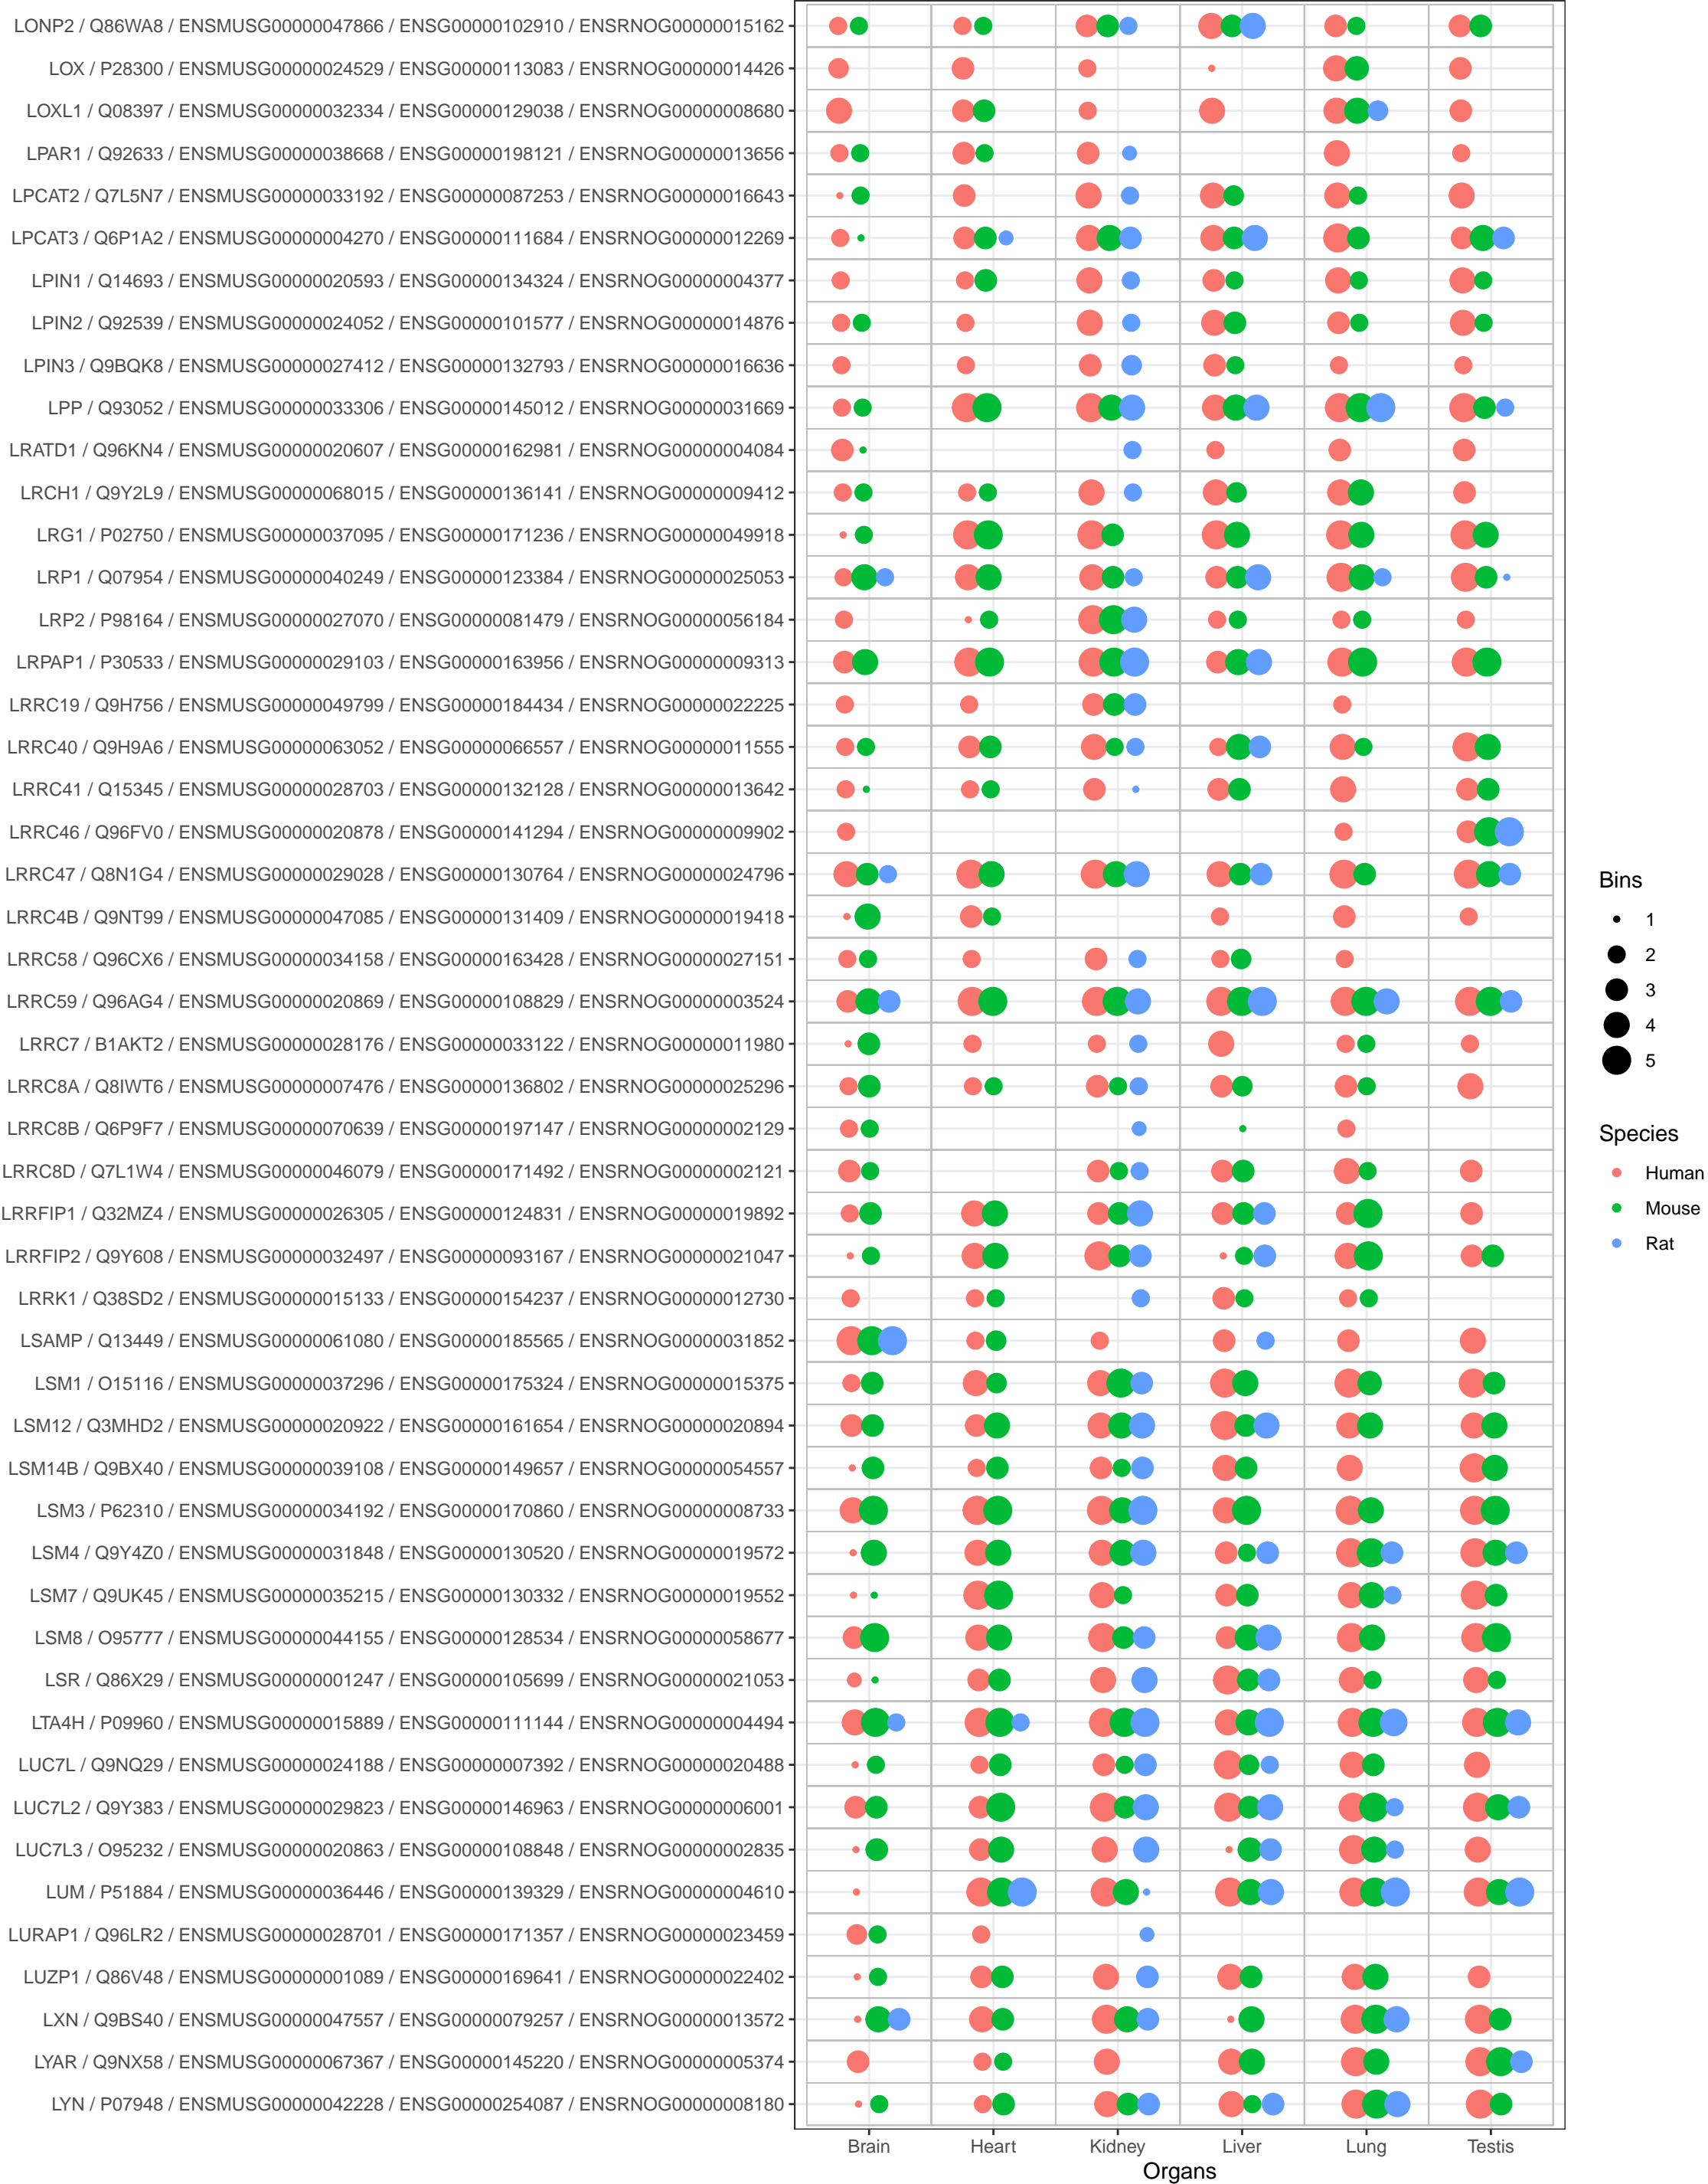

Organs

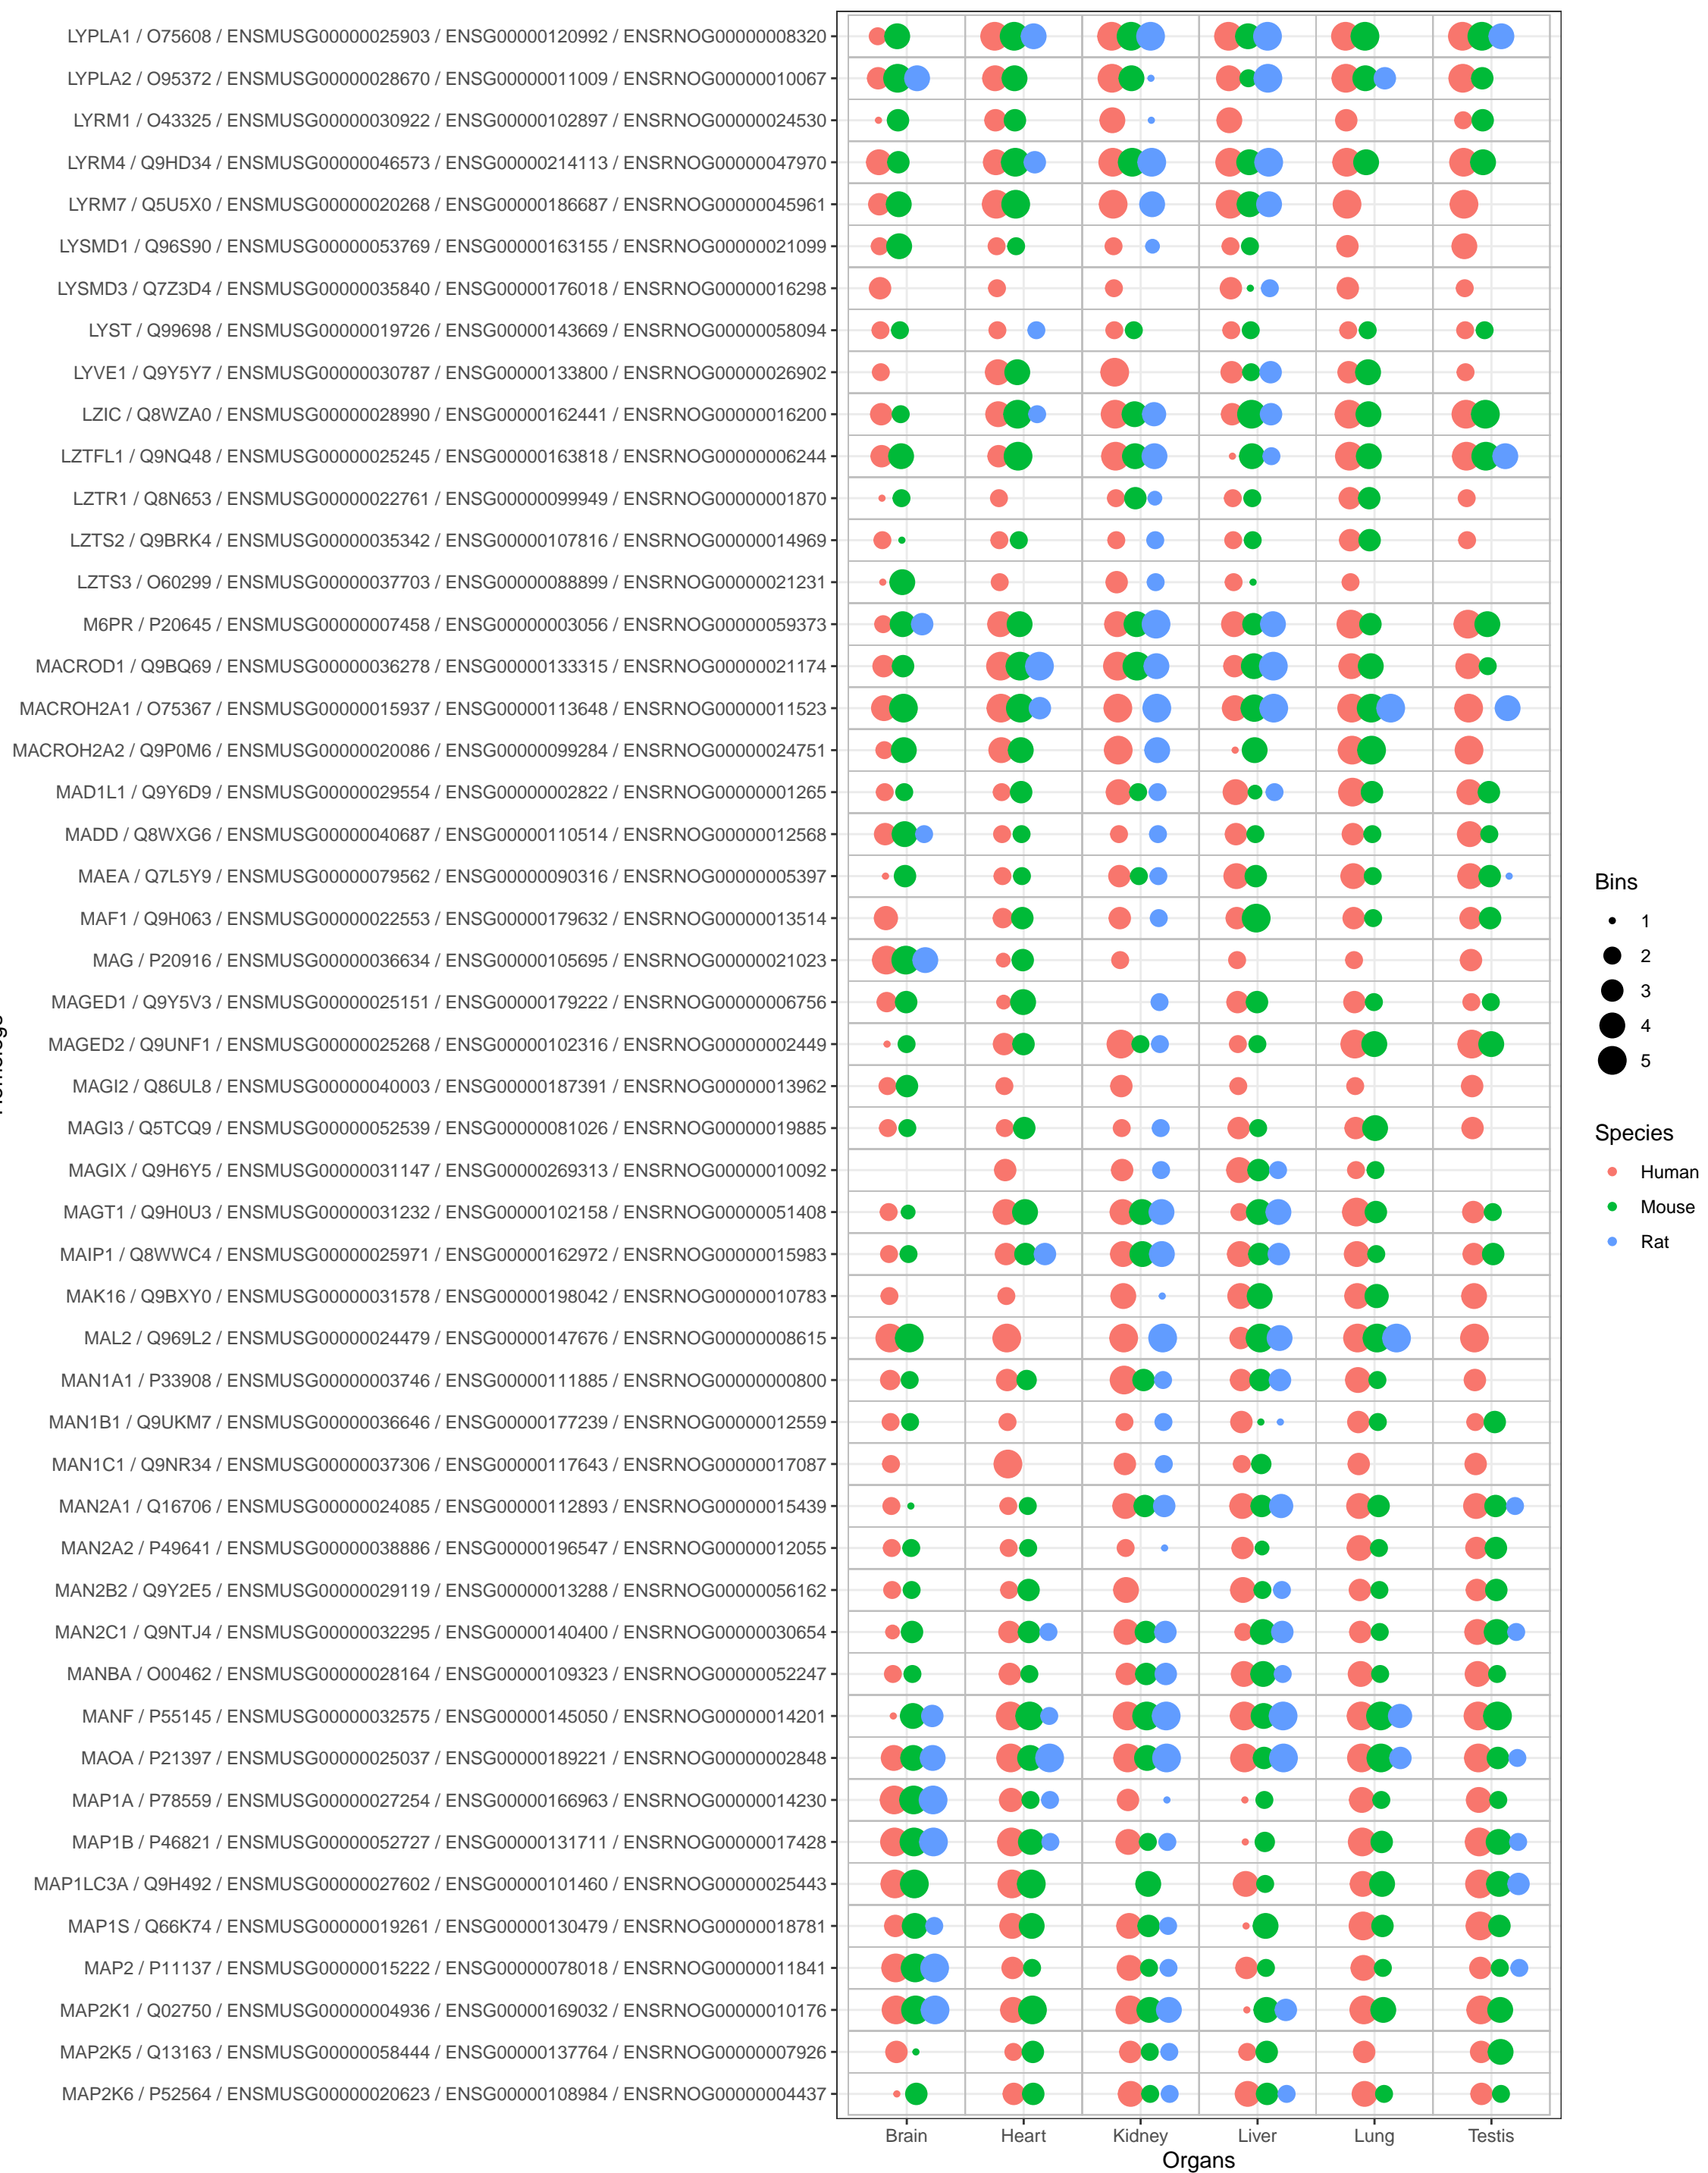



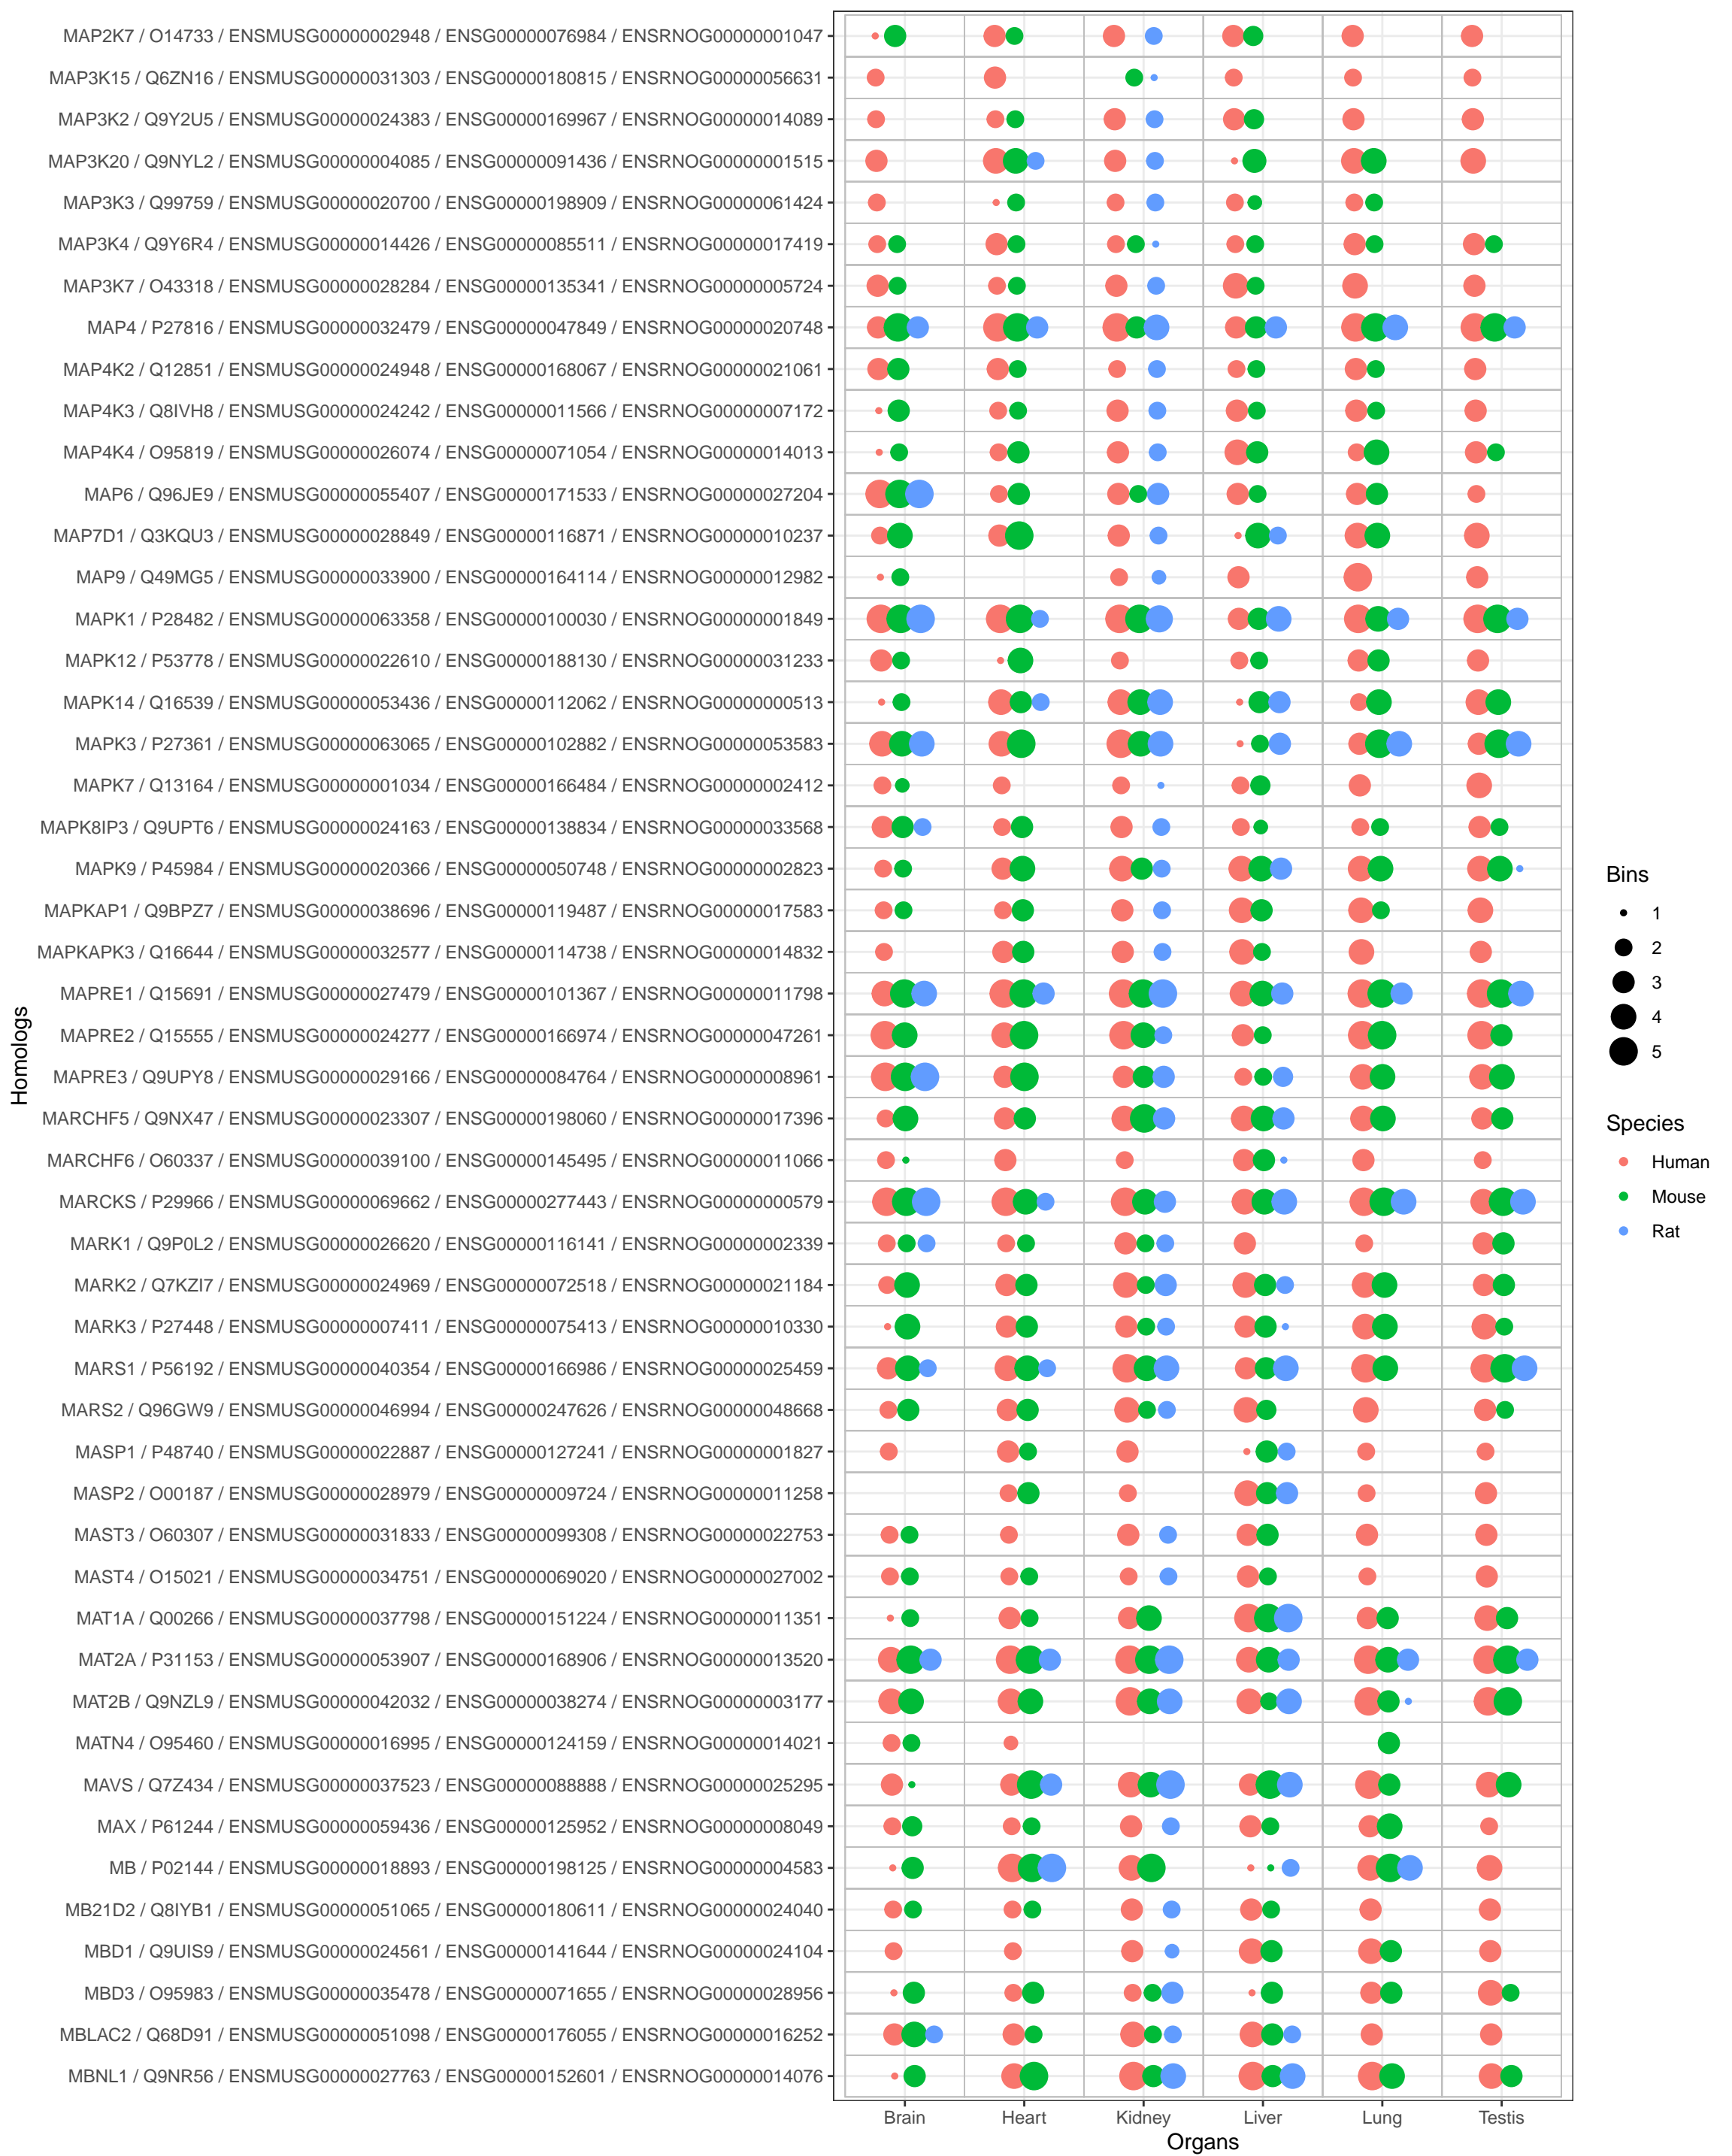

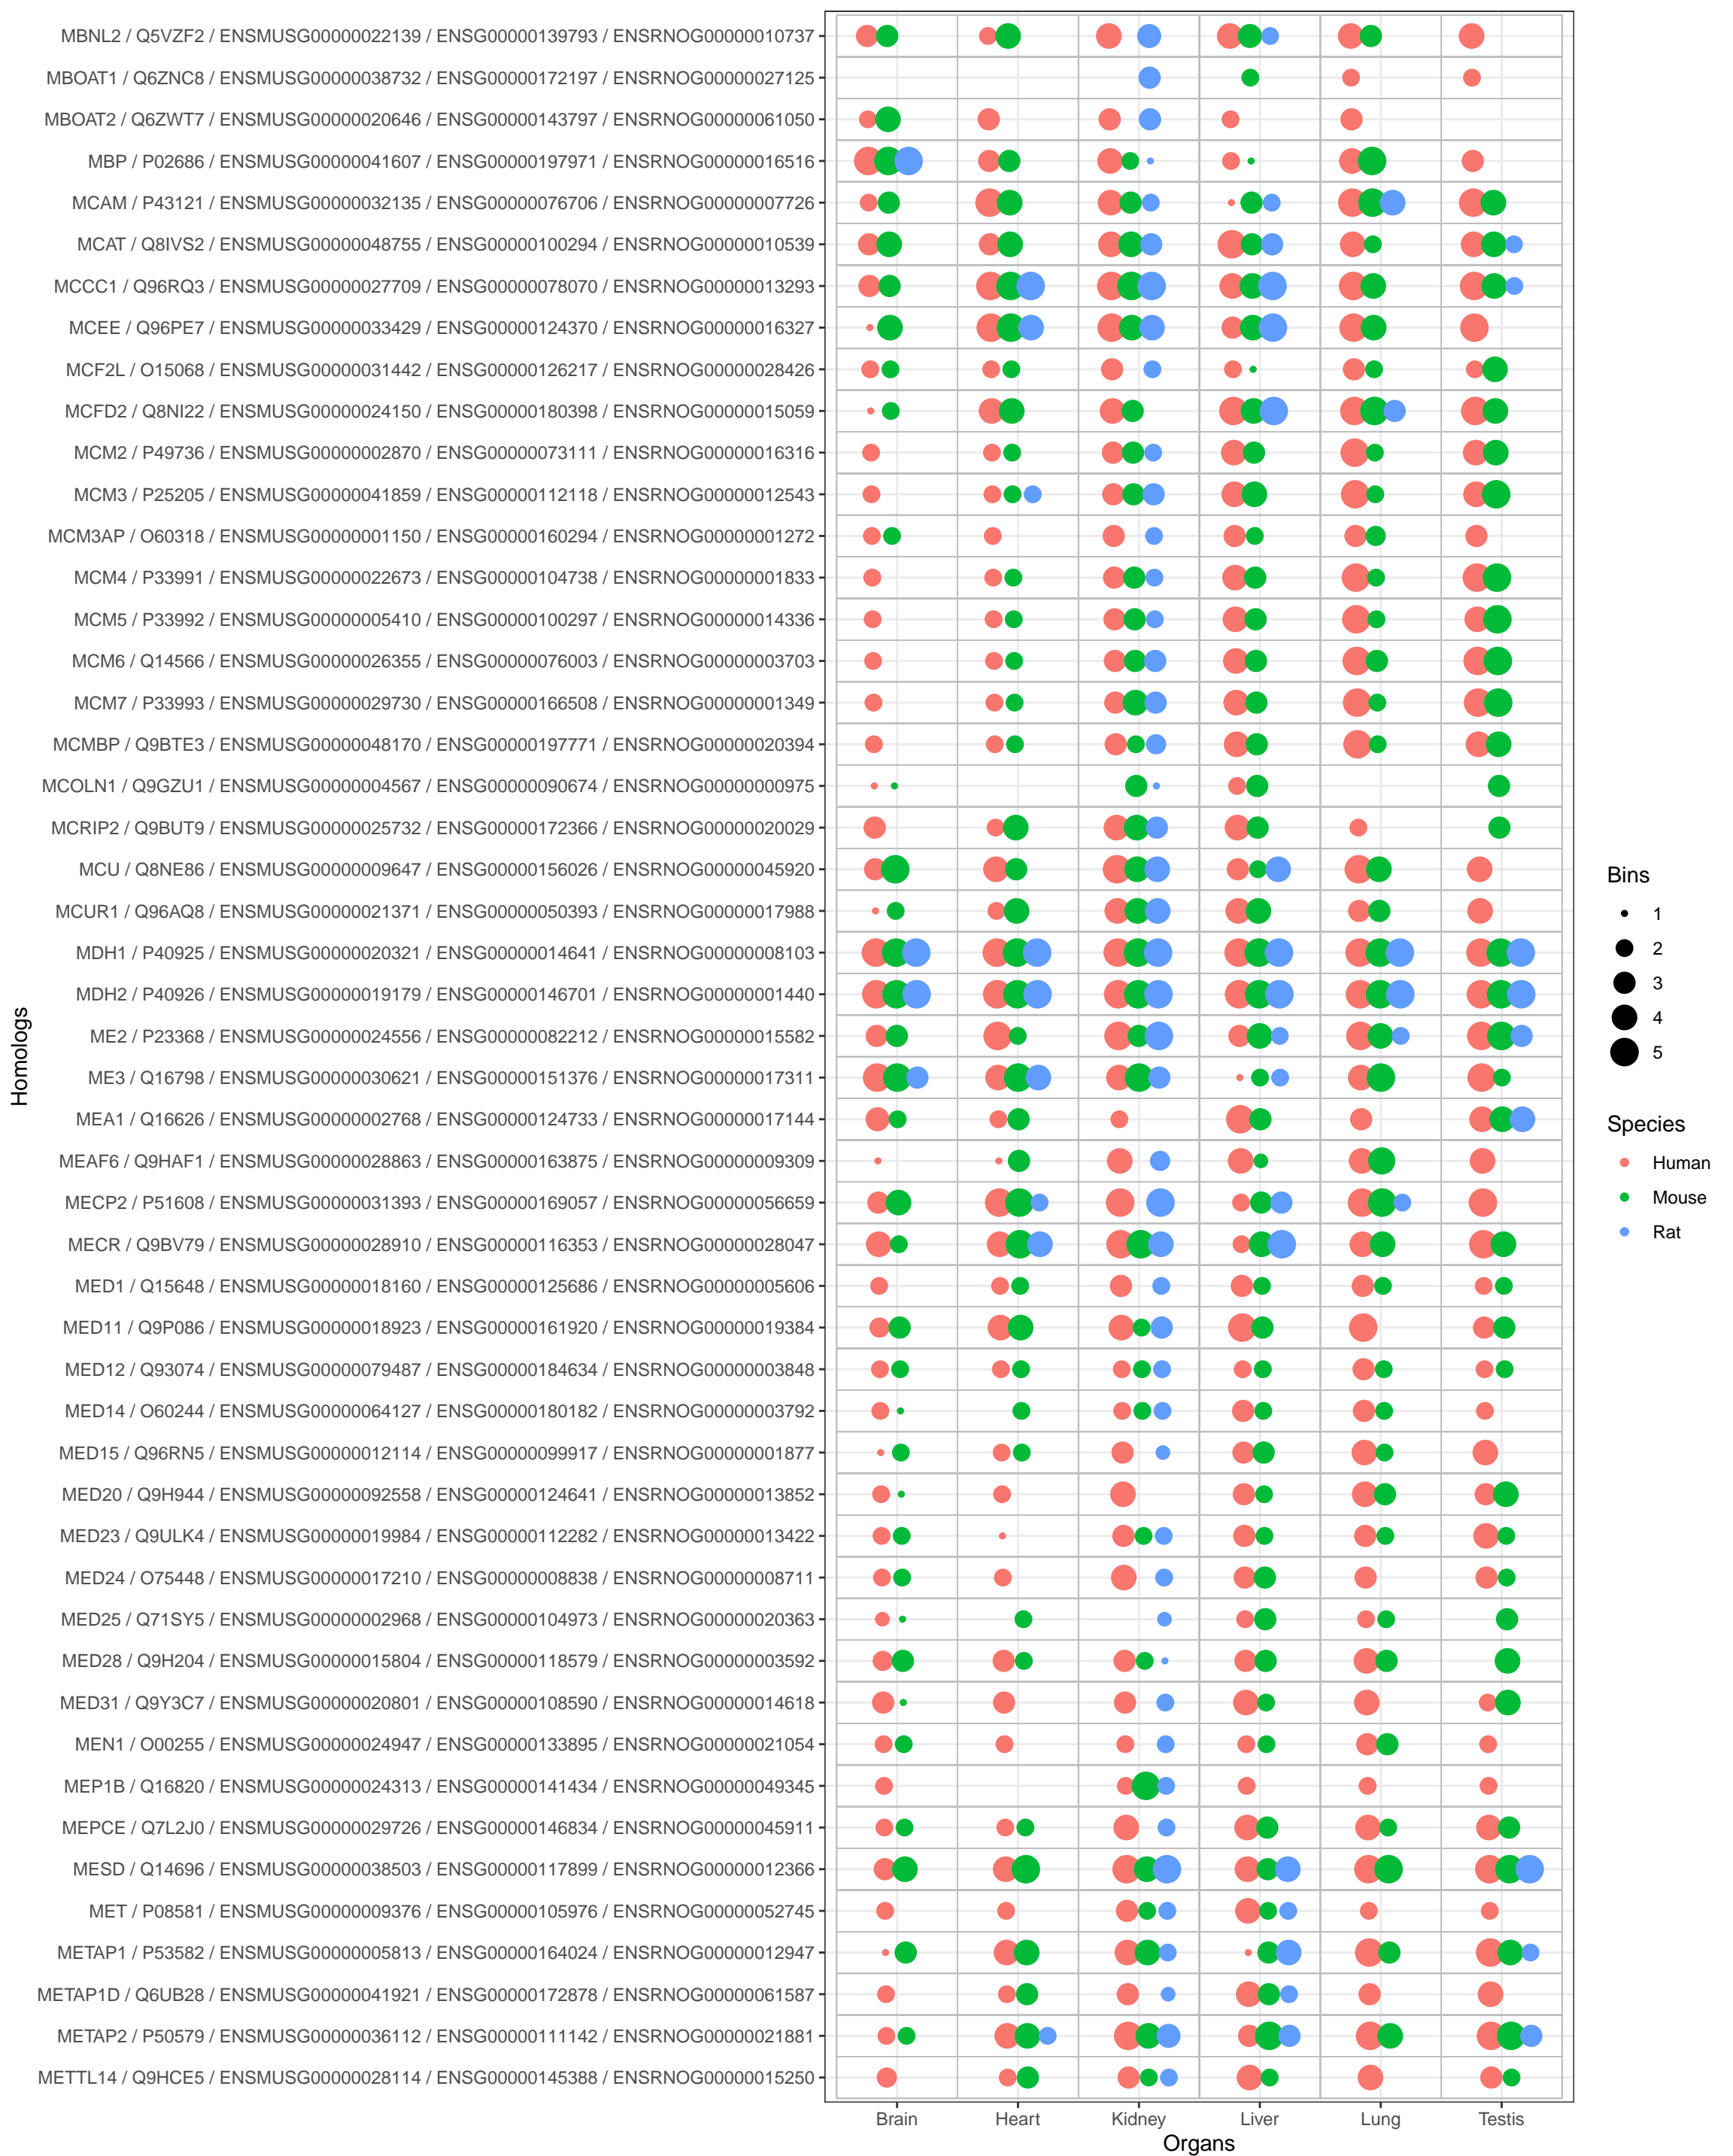

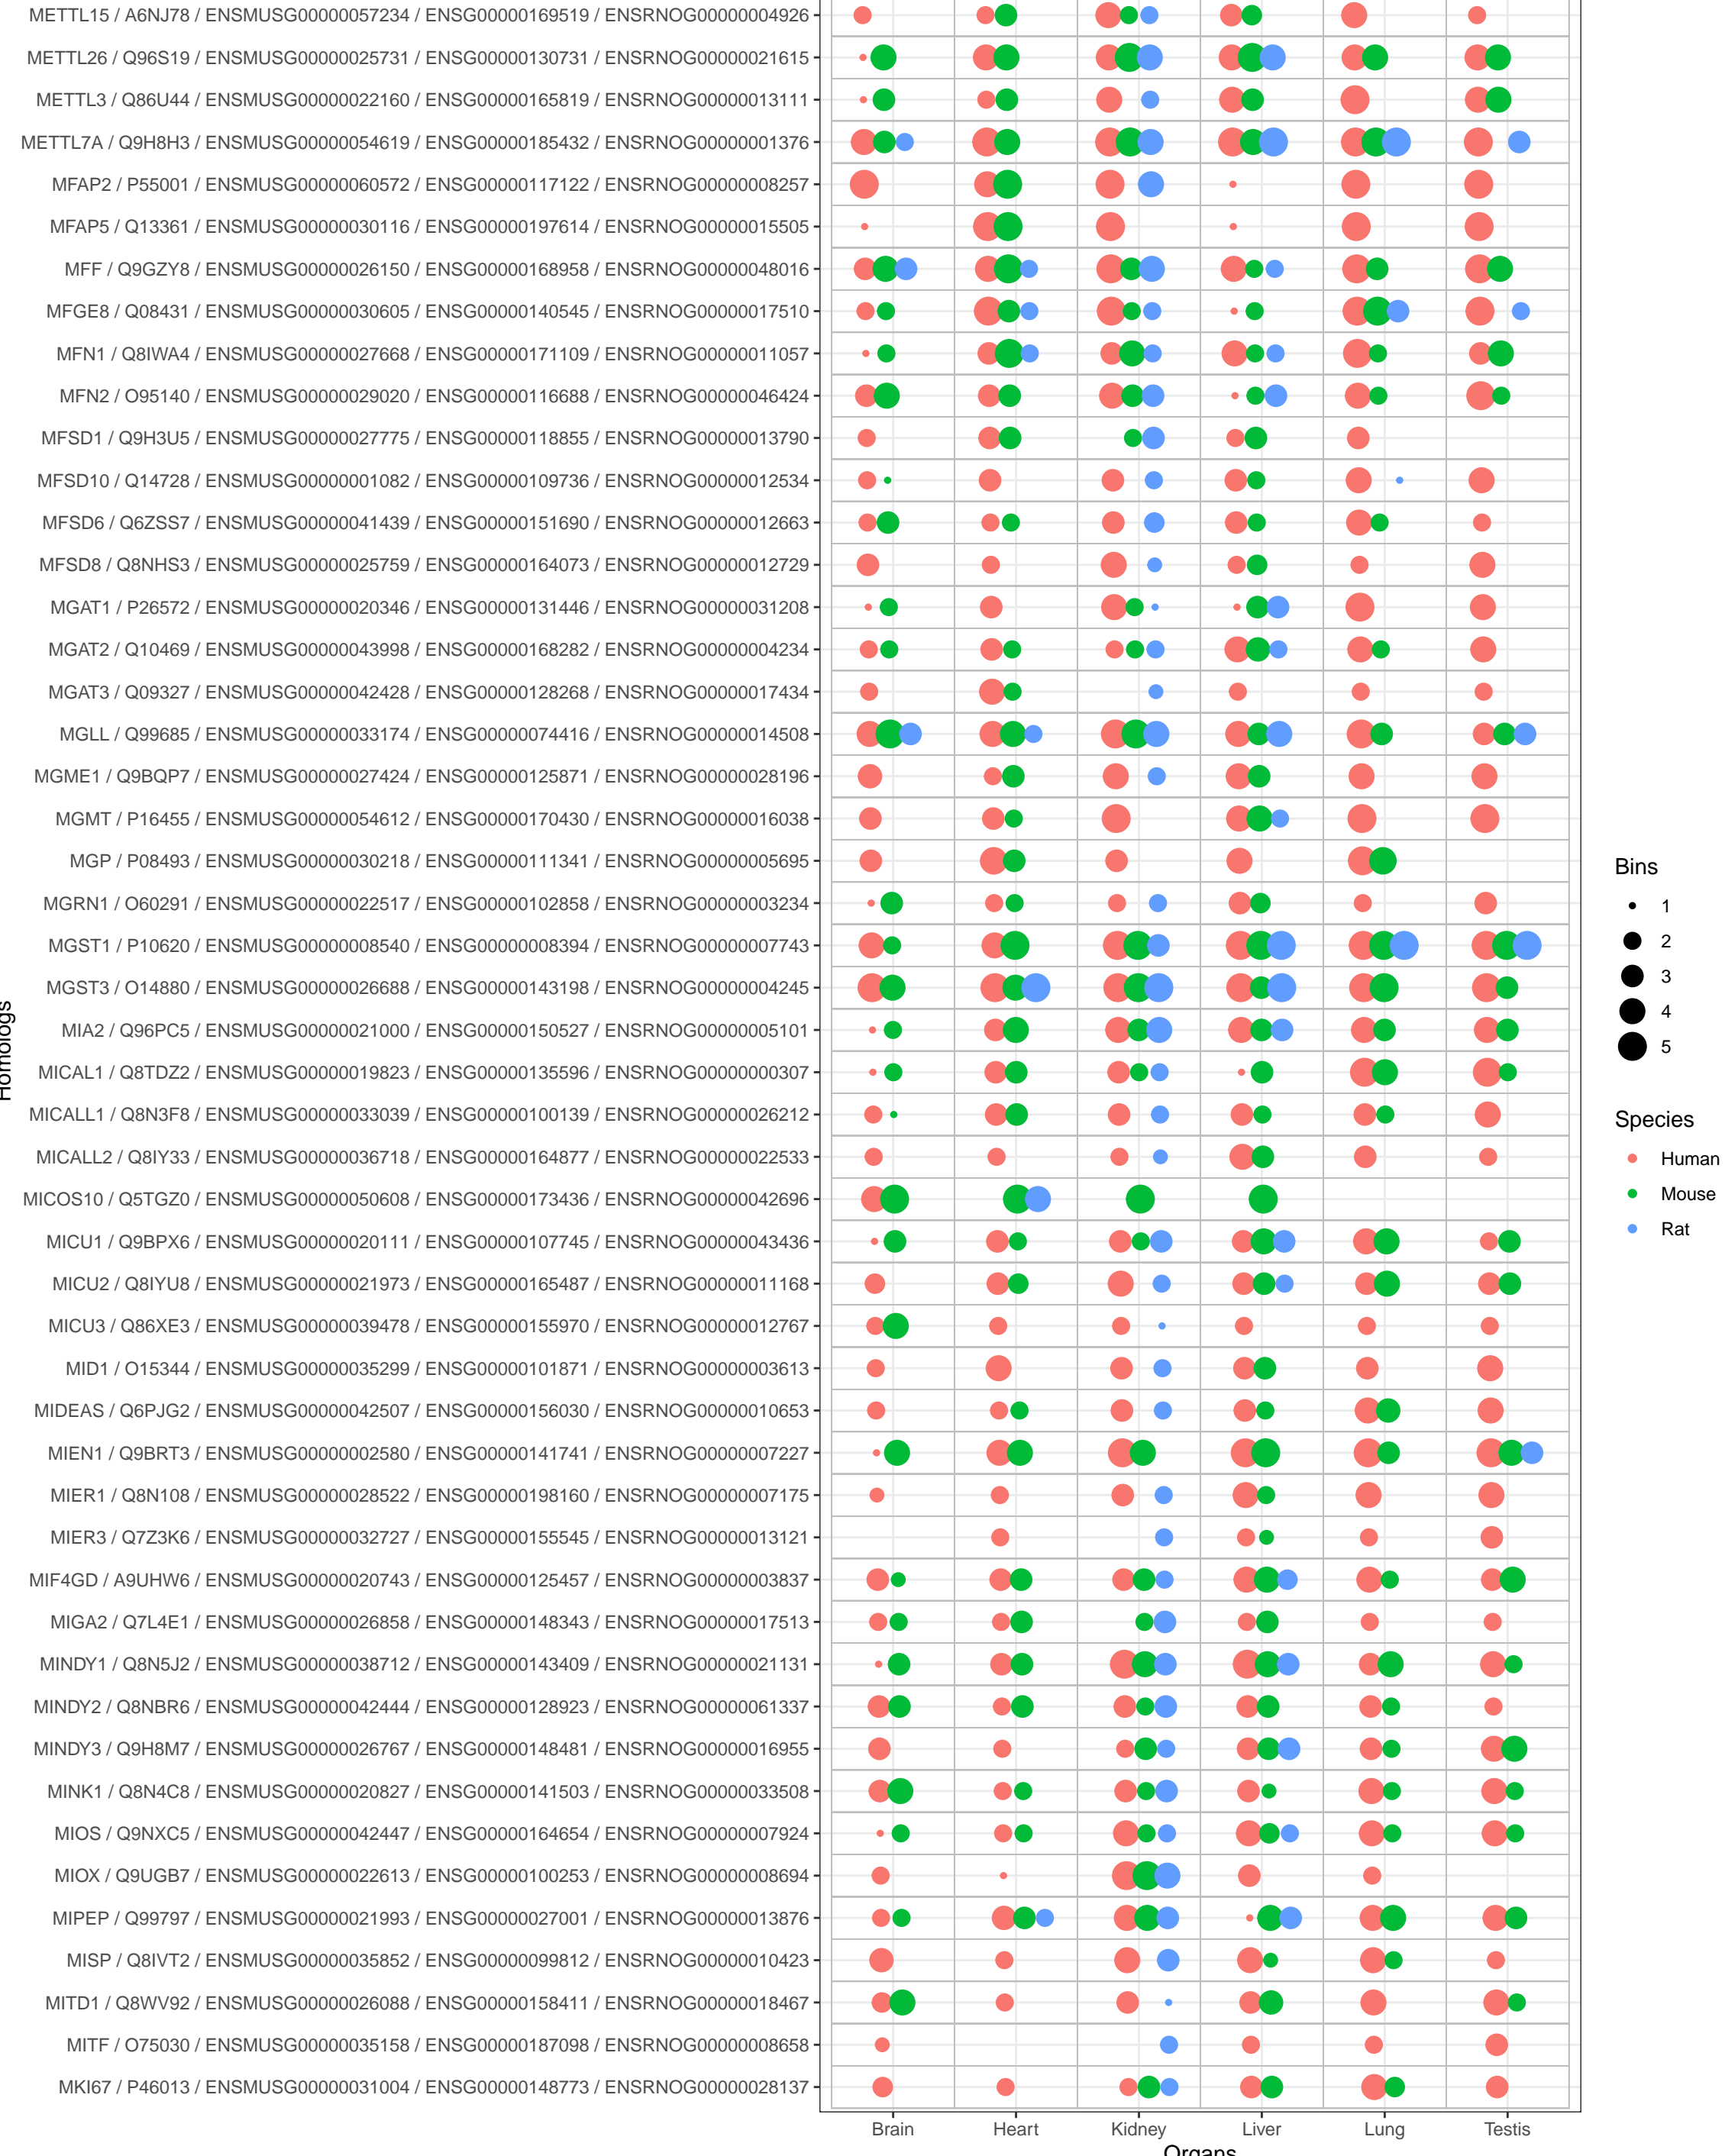

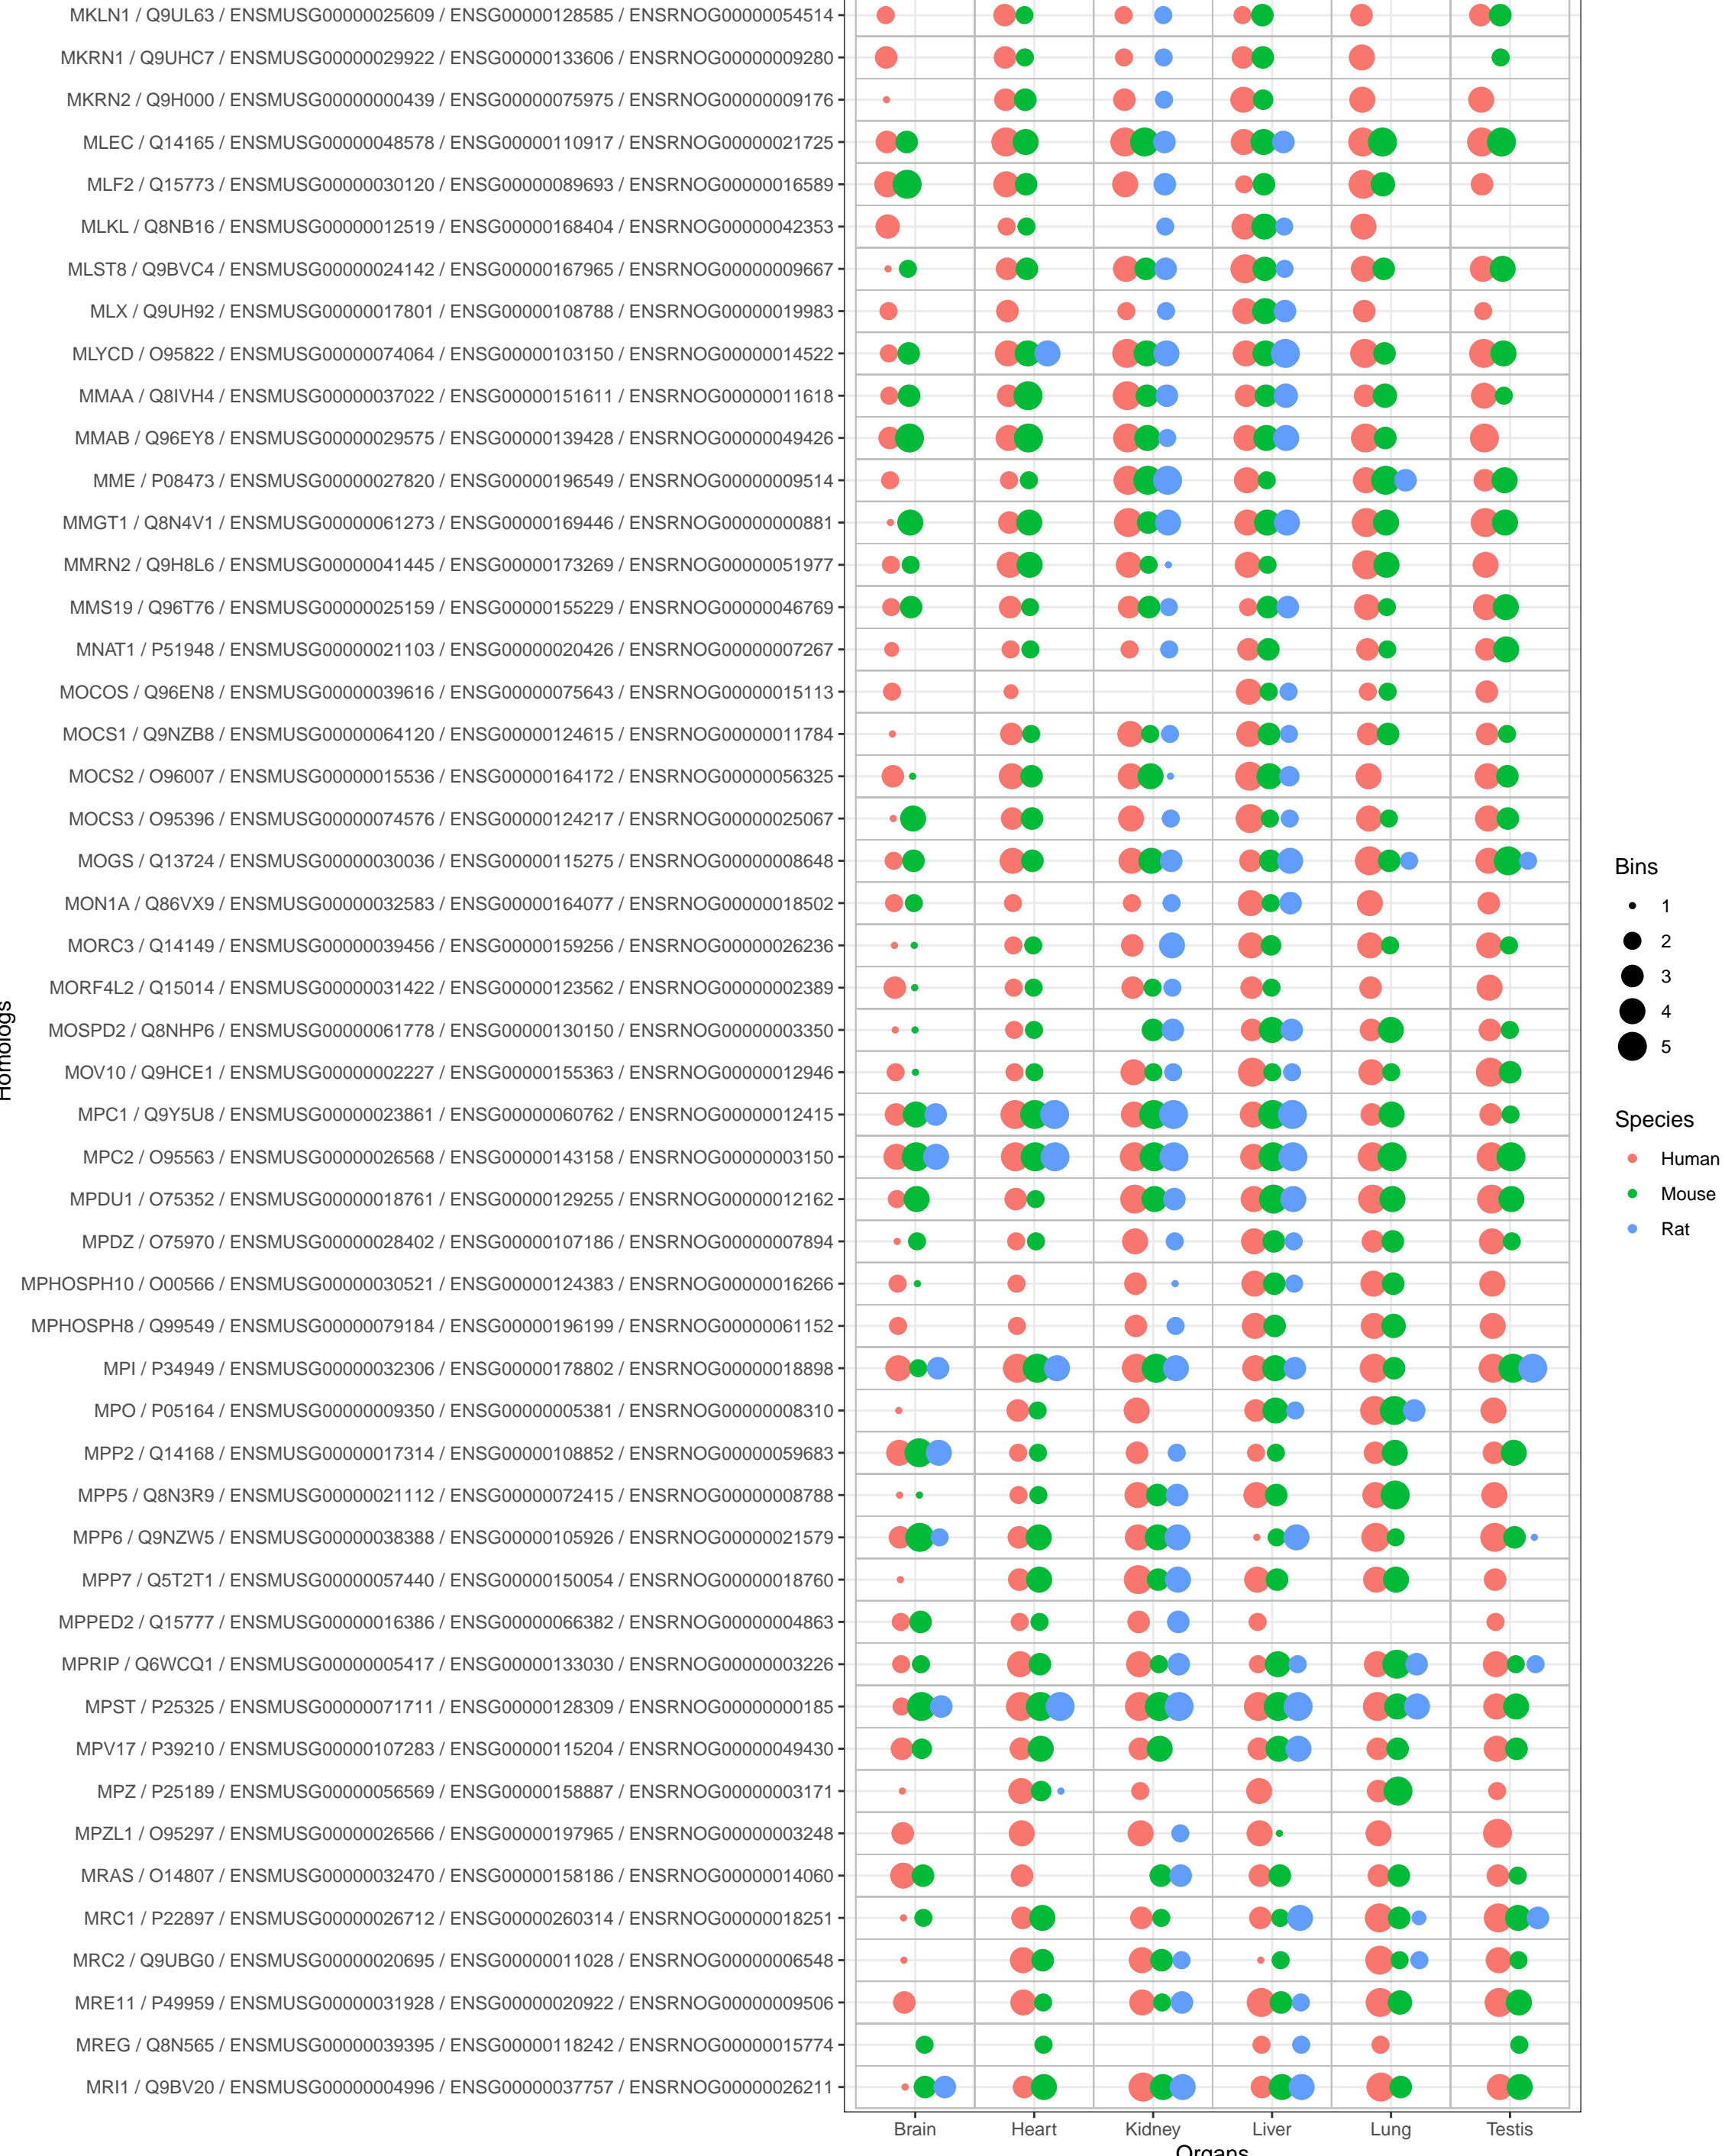

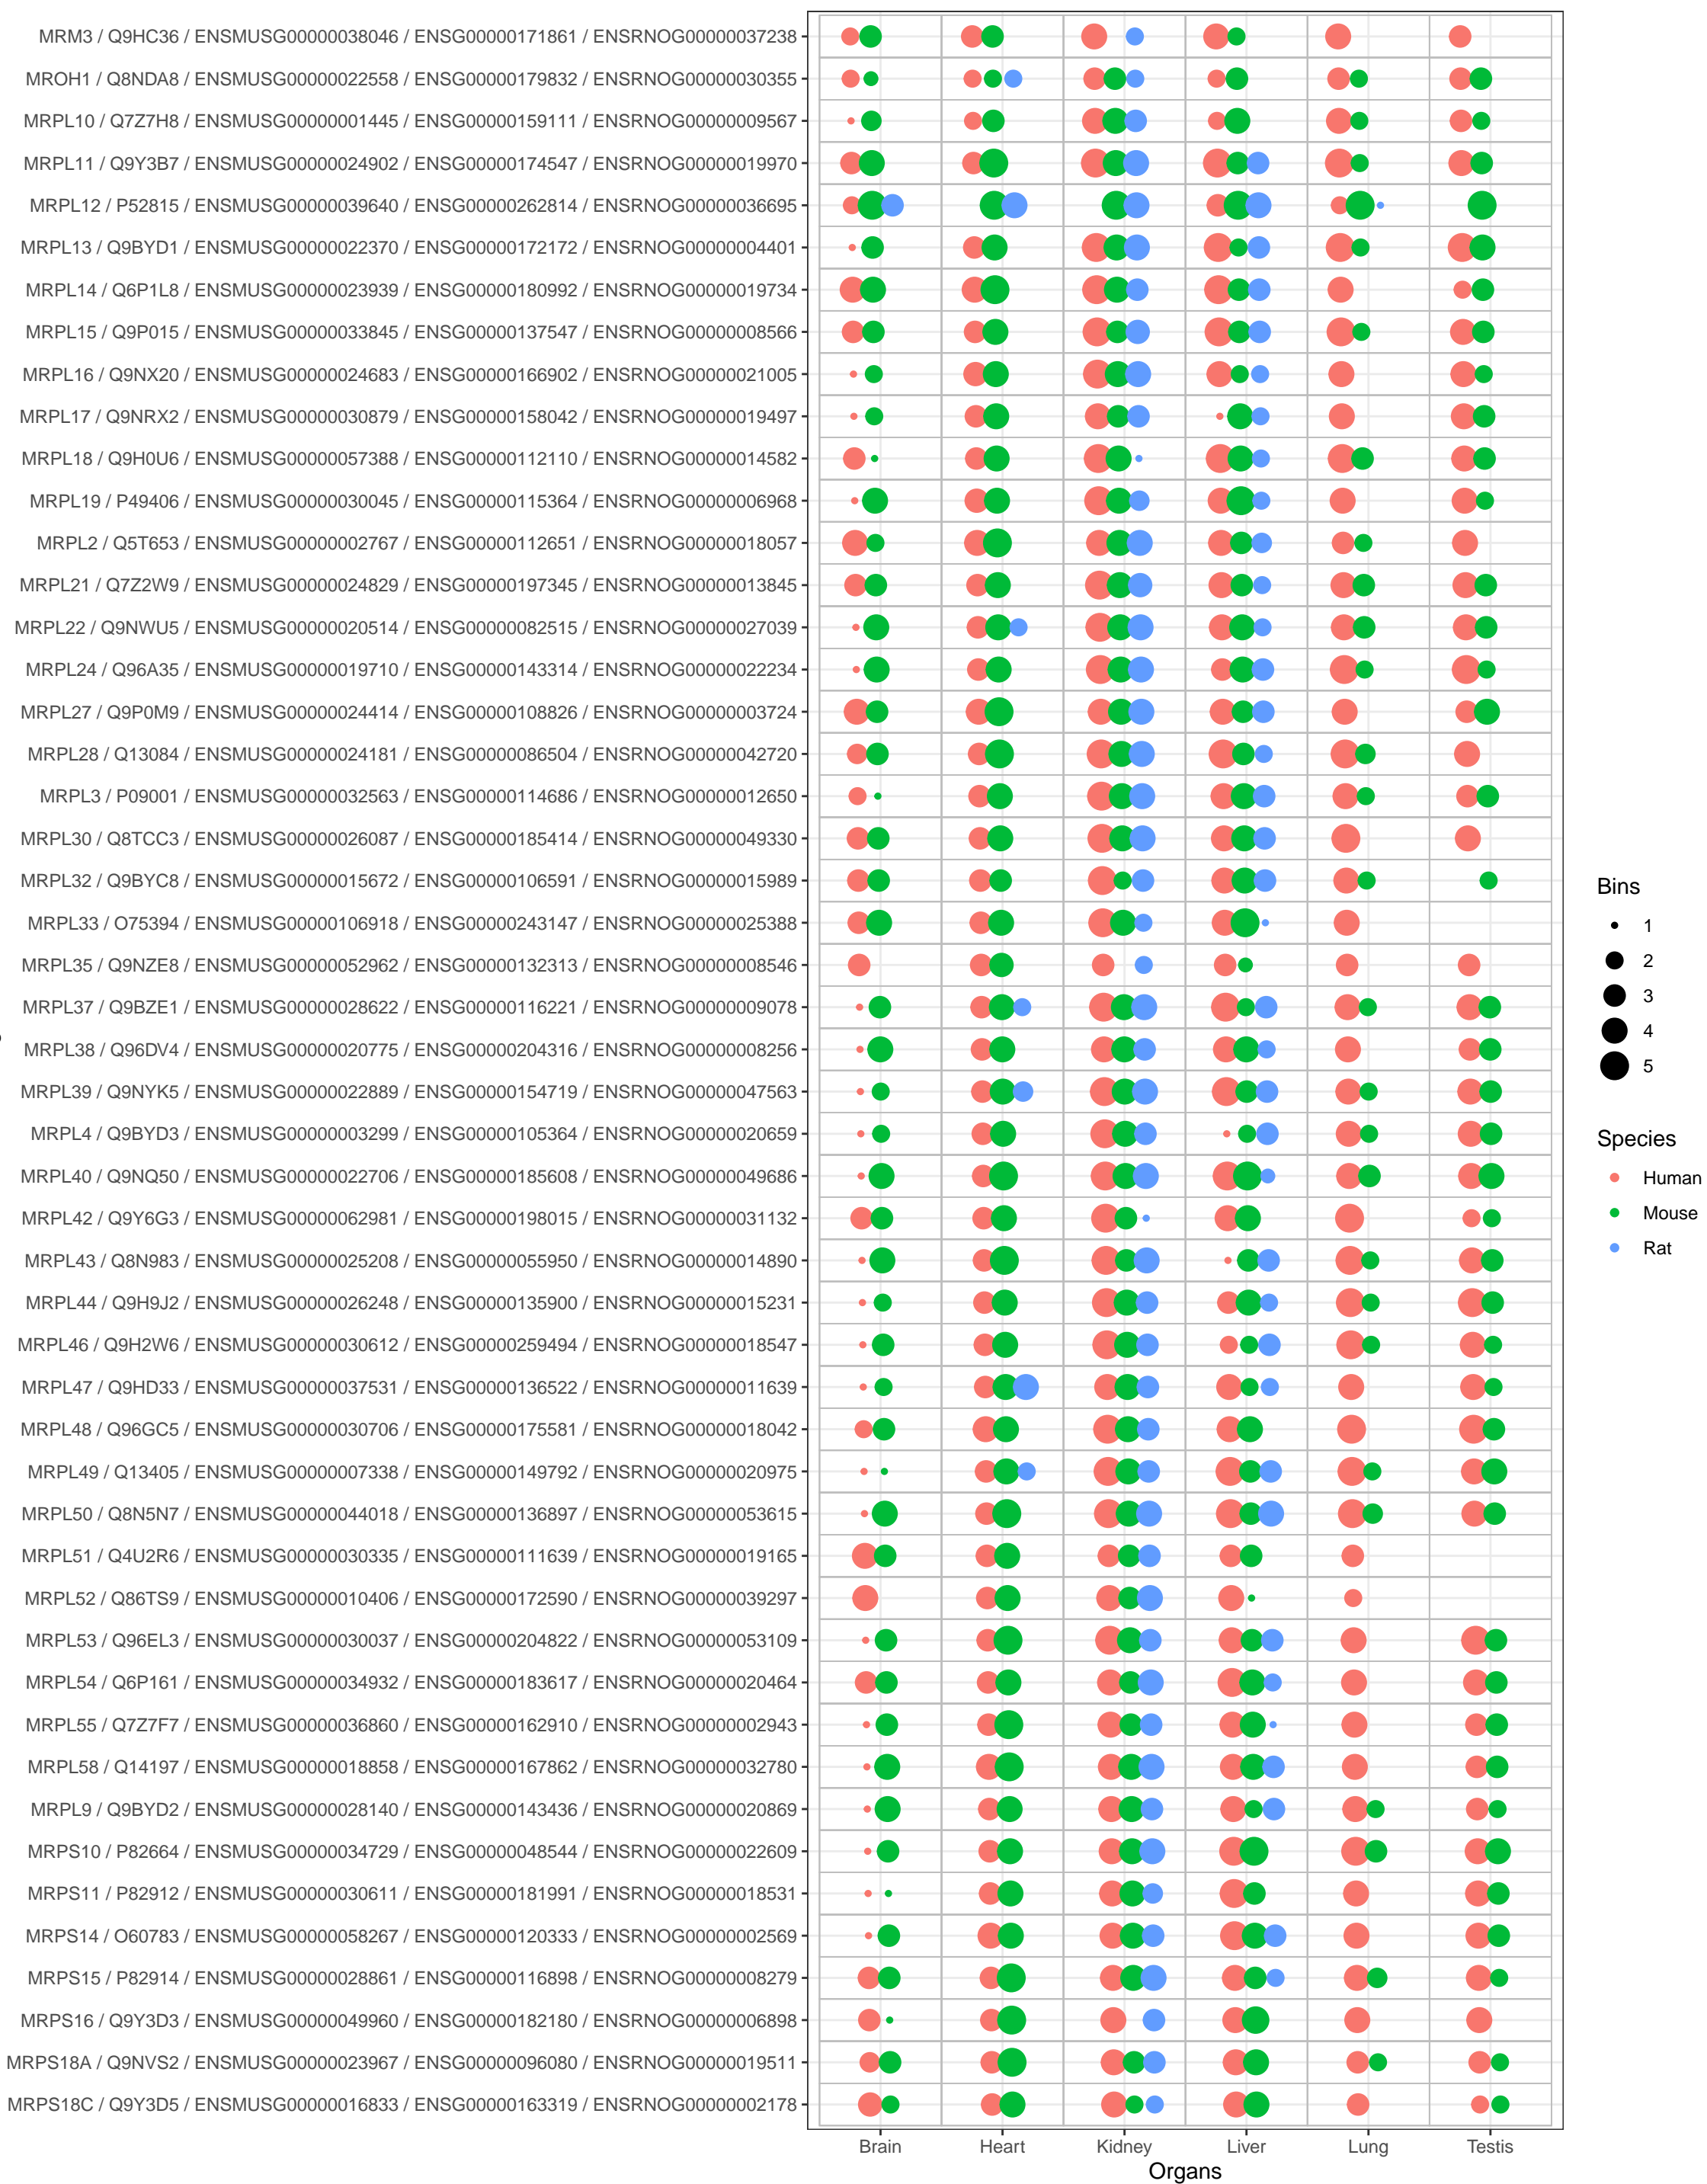

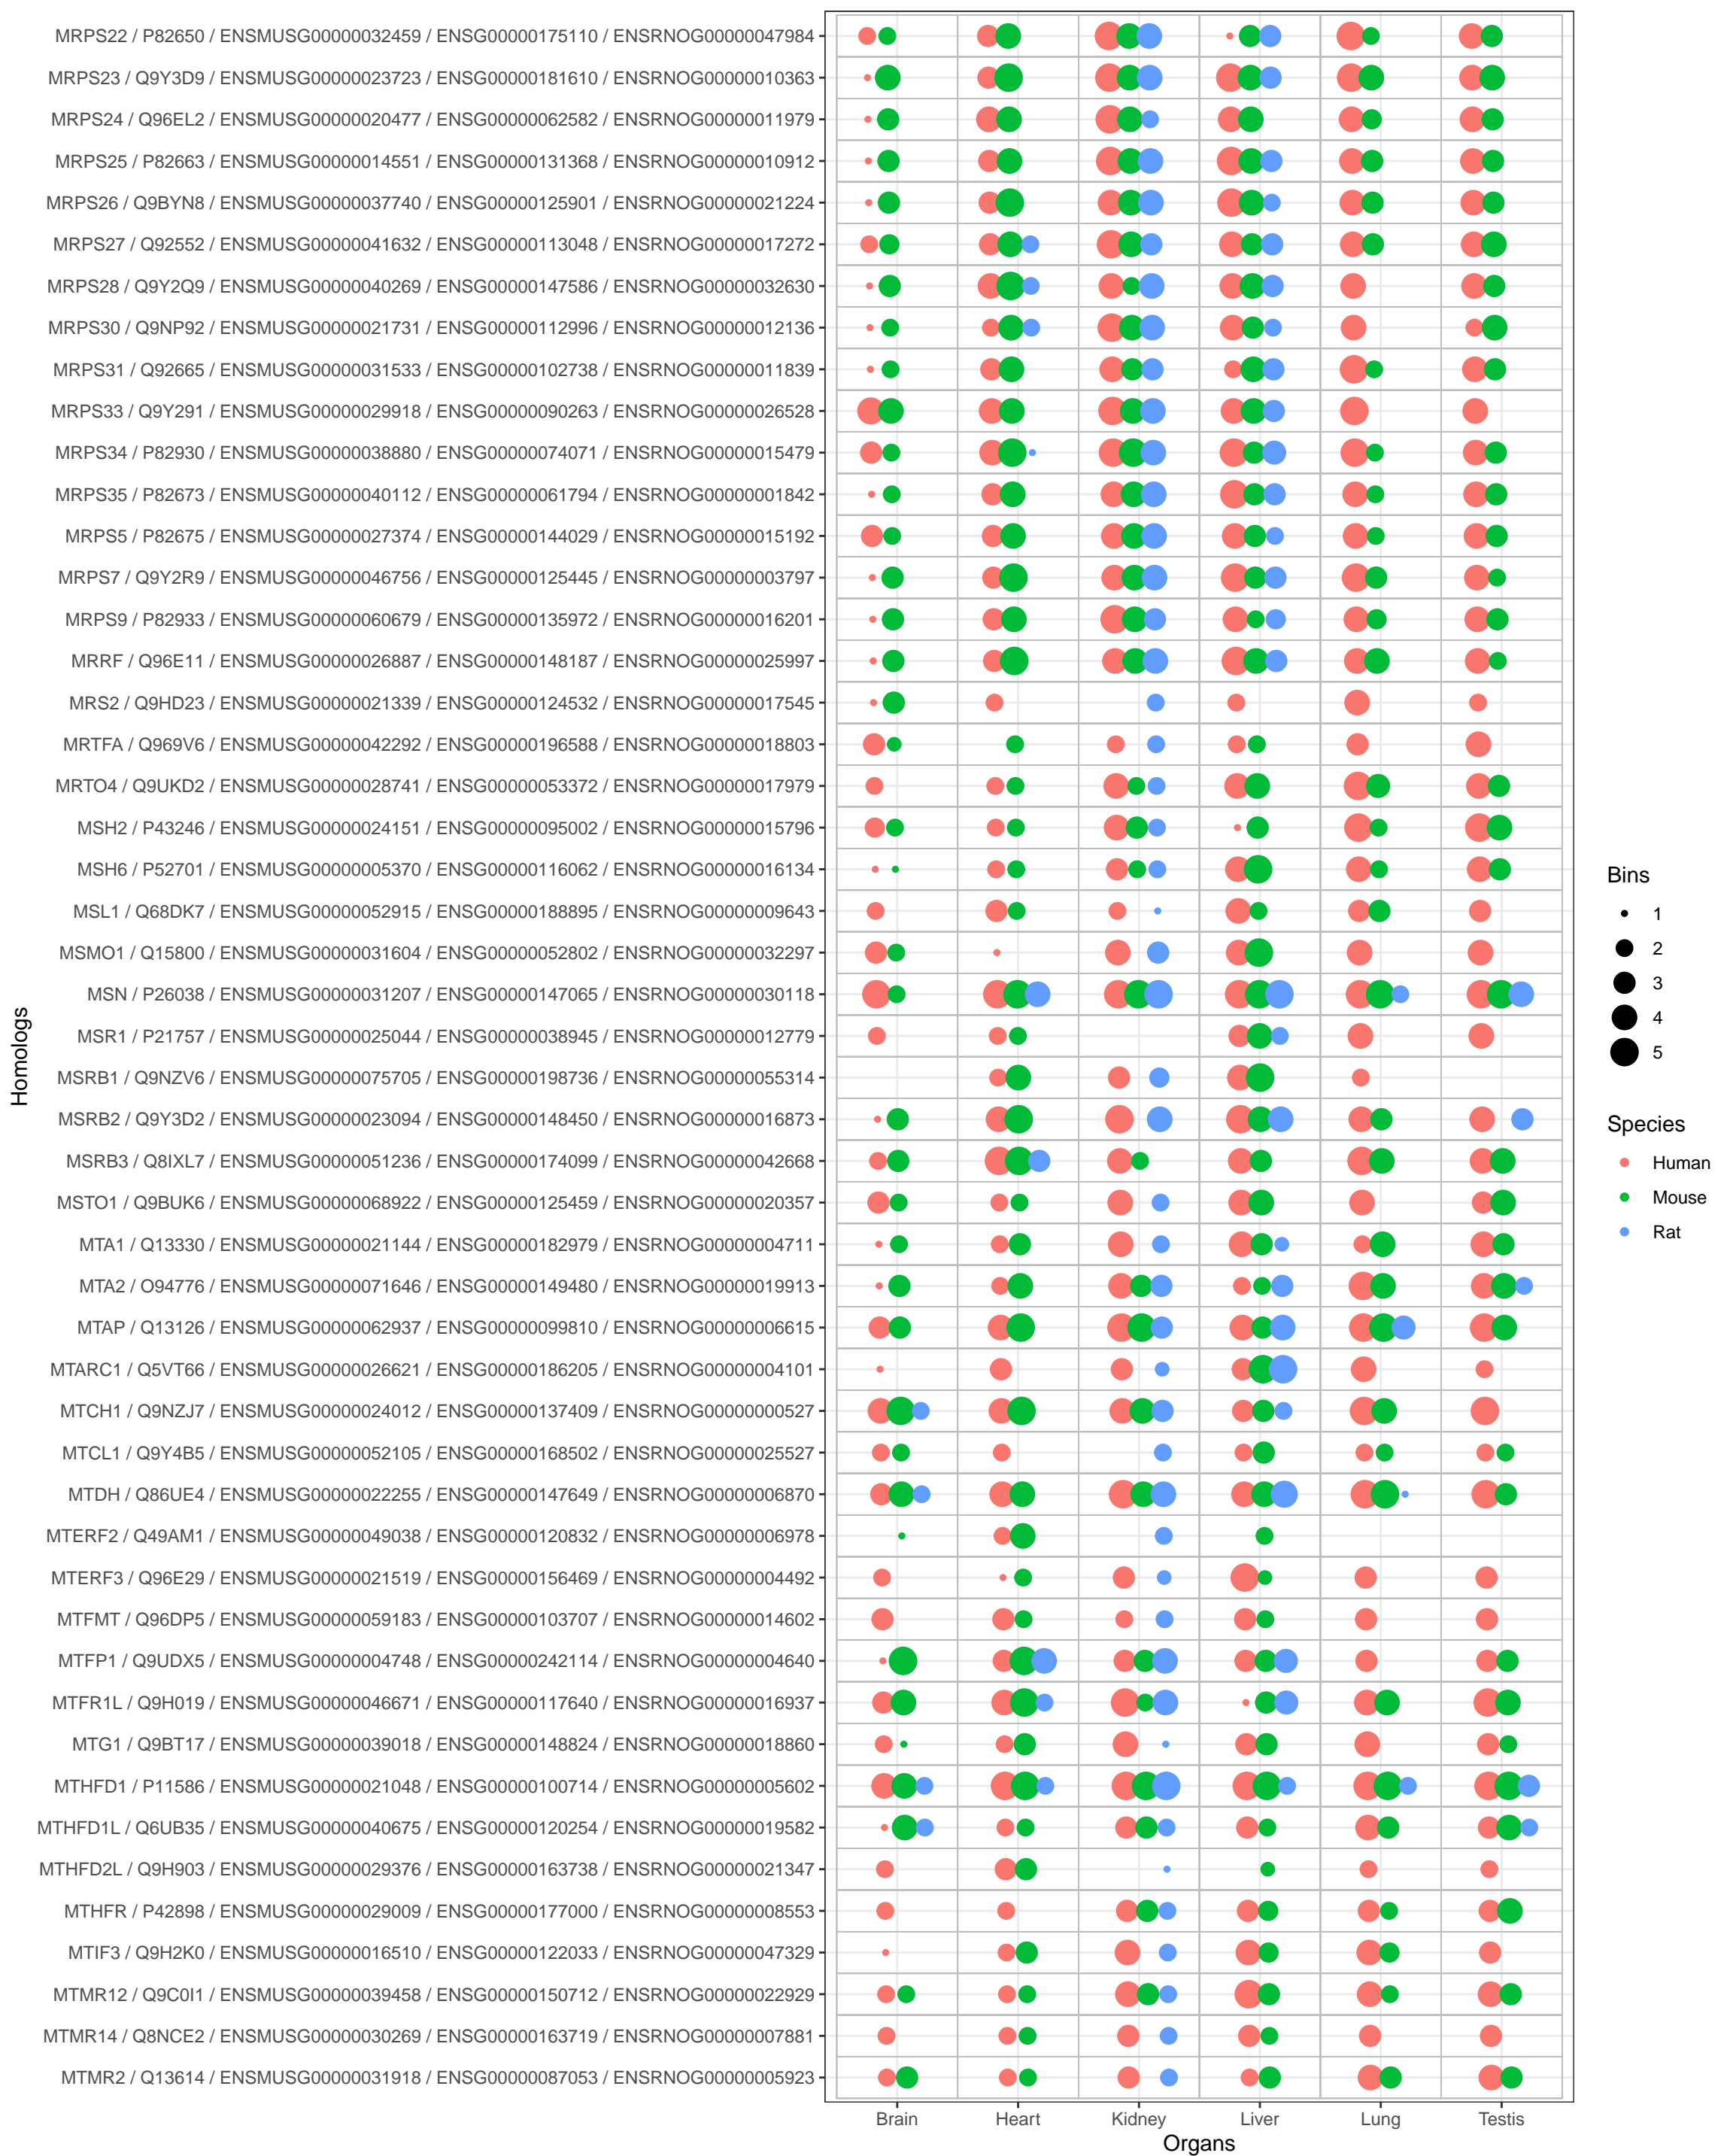

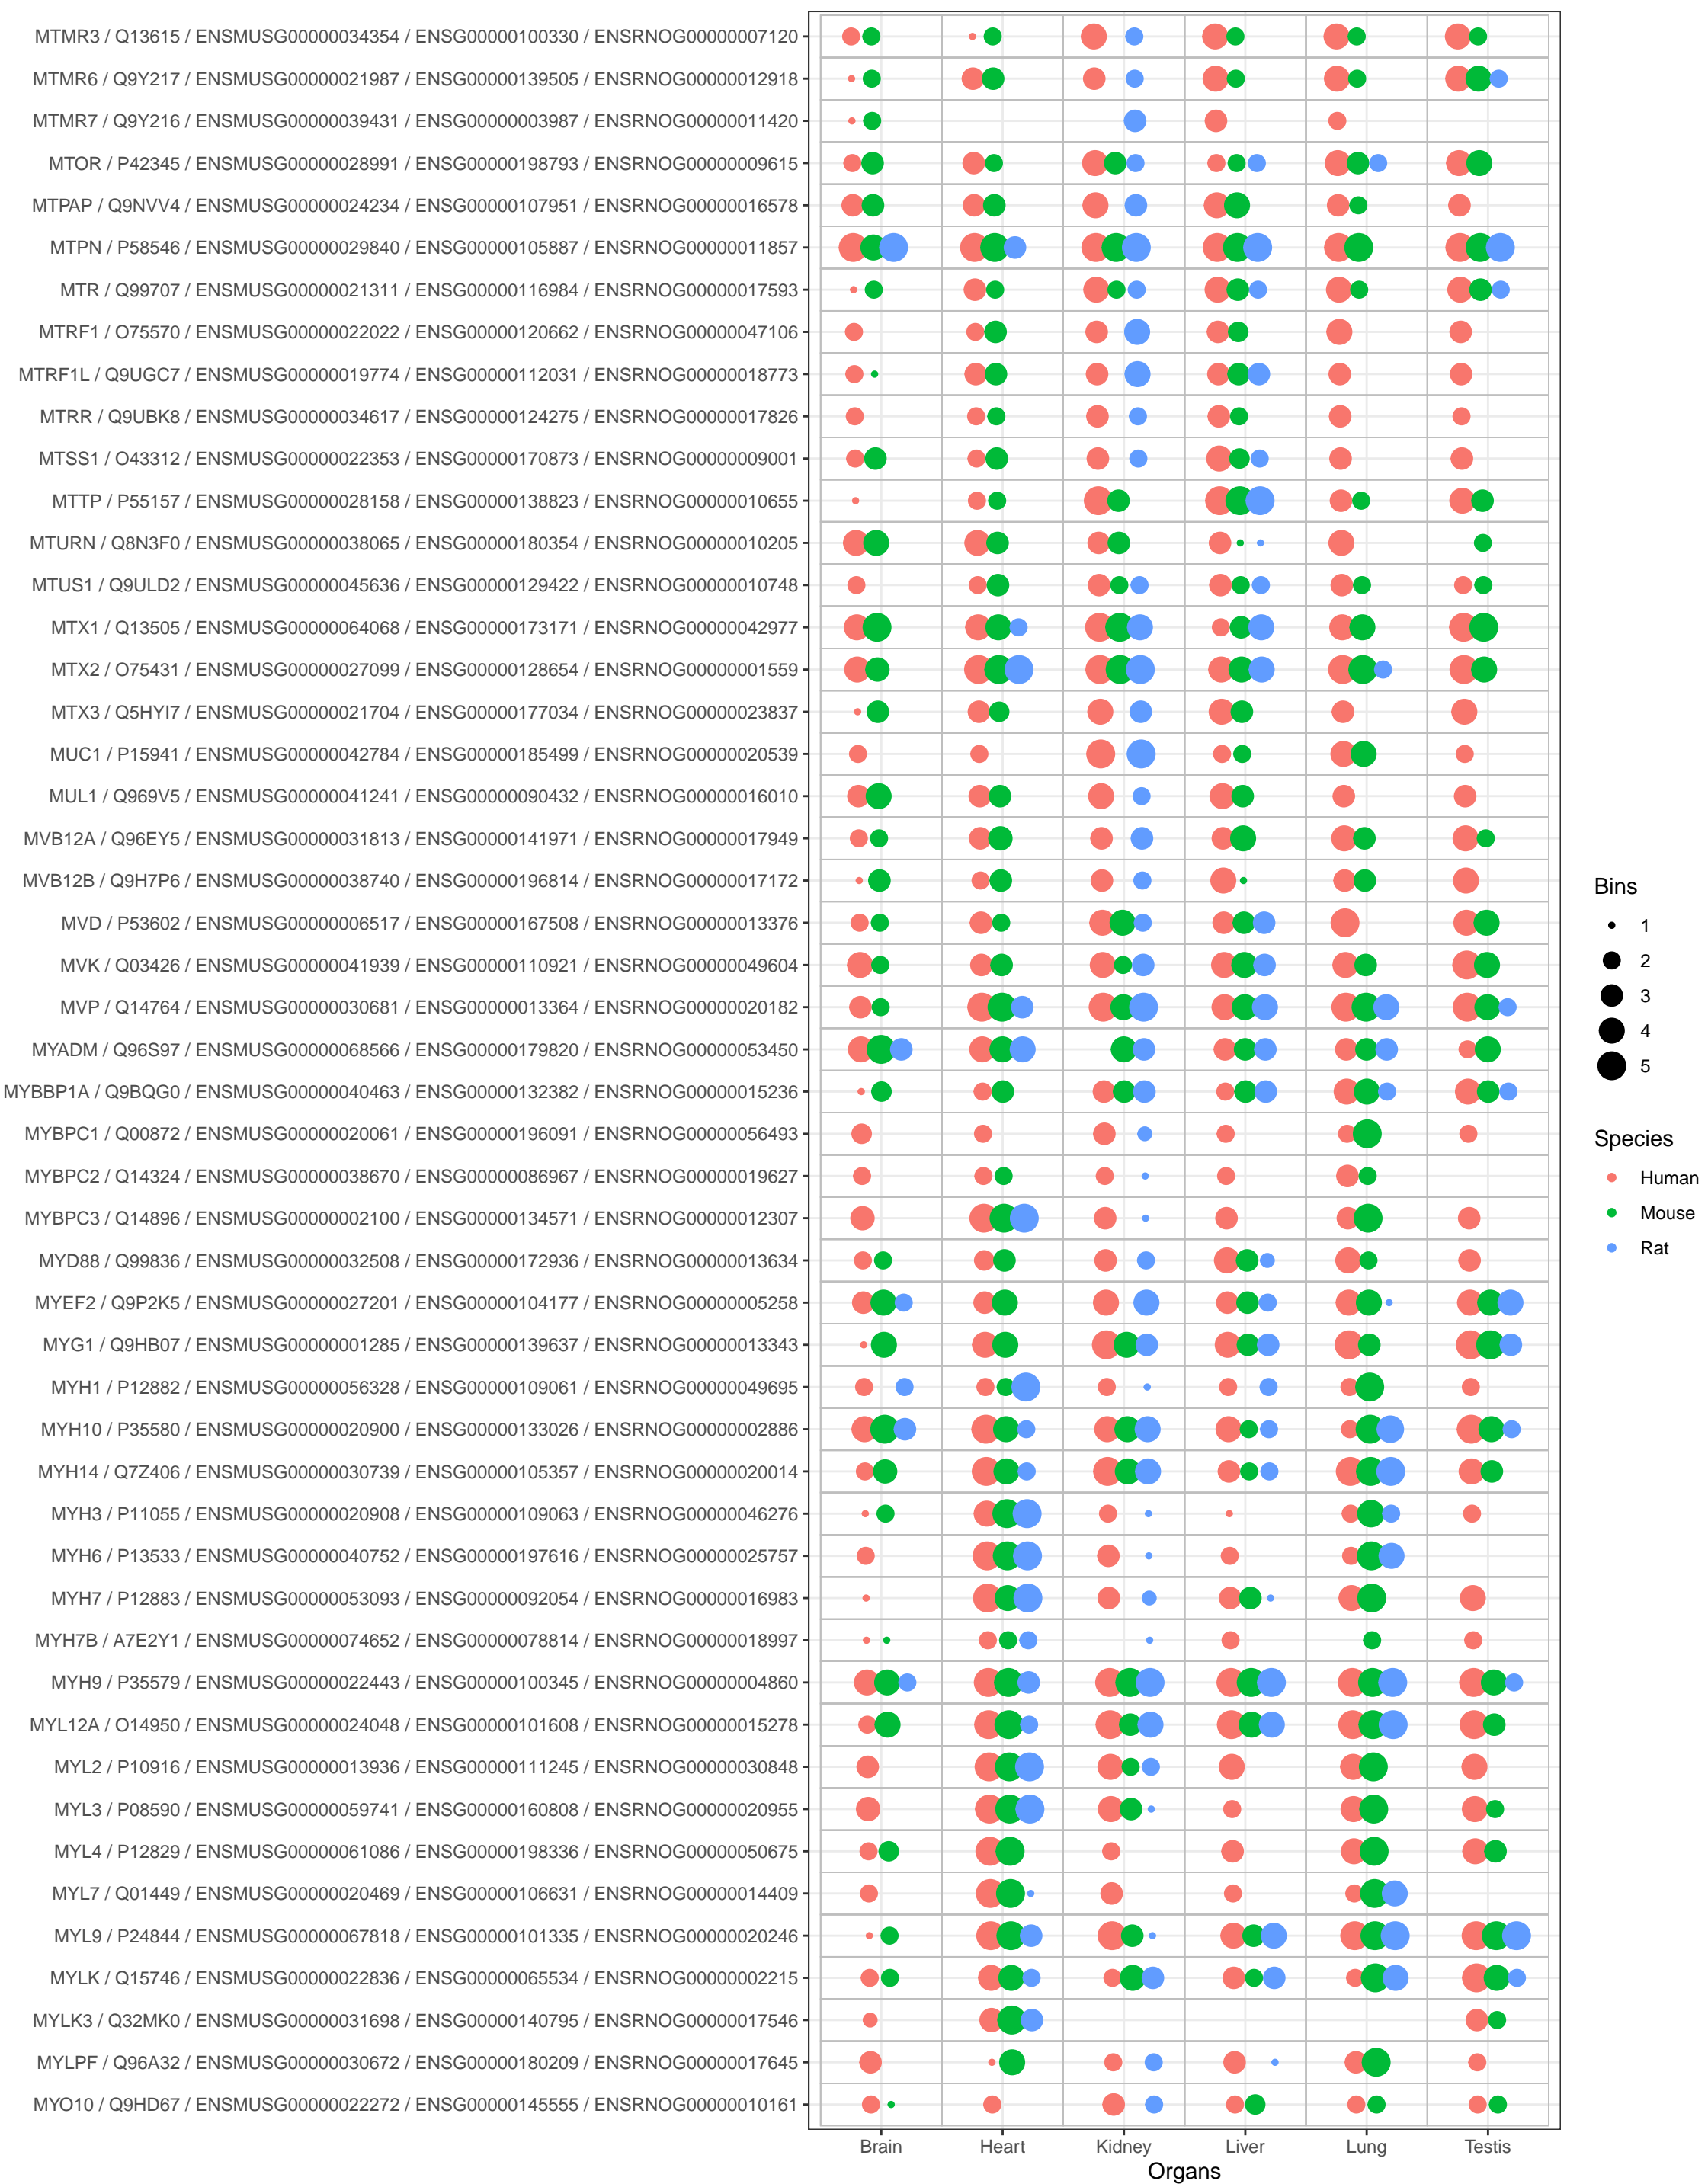

Homologs

MYO1B / O43795 / ENSMUSG00000018417 / ENSG00000128641 / ENSRNOG00000048152  
MYO1C / O00159 / ENSMUSG00000017774 / ENSG00000197879 / ENSRNOG00000004072  
MYO1D / O94832 / ENSMUSG00000035441 / ENSG00000176658 / ENSRNOG00000003276  
MYO1E / Q12965 / ENSMUSG00000032220 / ENSG00000157483 / ENSRNOG00000061928  
MYO1F / O00160 / ENSMUSG00000024300 / ENSG00000142347 / ENSRNOG00000008409  
MYO5A / Q9Y411 / ENSMUSG00000034593 / ENSG00000197535 / ENSRNOG00000058866  
MYO5B / Q9ULV0 / ENSMUSG00000025885 / ENSG00000167306 / ENSRNOG00000014104  
MYO5C / Q9NQX4 / ENSMUSG00000033590 / ENSG00000128833 / ENSRNOG00000008356  
MYO7A / Q13402 / ENSMUSG00000030761 / ENSG00000137474 / ENSRNOG00000013641  
MYO7B / Q6PIF6 / ENSMUSG00000024388 / ENSG00000169994 / ENSRNOG00000015035  
MYO9A / B2RTY4 / ENSMUSG00000039585 / ENSG00000066933 / ENSRNOG00000011619  
MYO9B / Q13459 / ENSMUSG00000004677 / ENSG00000099331 / ENSRNOG00000016256  
MYOF / Q9NZM1 / ENSMUSG00000048612 / ENSG00000138119 / ENSRNOG00000016117  
MYOM3 / Q5VTT5 / ENSMUSG00000037139 / ENSG00000142661 / ENSRNOG00000032994  
MYORG / Q6NSJ0 / ENSMUSG00000046312 / ENSG00000164976 / ENSRNOG00000023208  
MYOZ1 / Q9NP98 / ENSMUSG00000068697 / ENSG00000177791 / ENSRNOG00000040122  
MYOZ2 / Q9NPC6 / ENSMUSG00000028116 / ENSG00000172399 / ENSRNOG00000014815  
MYPN / Q86TC9 / ENSMUSG00000020067 / ENSG00000138347 / ENSRNOG00000000383  
N4BP3 / O15049 / ENSMUSG00000001053 / ENSG00000145911 / ENSRNOG00000021731  
NAA10 / P41227 / ENSMUSG00000031388 / ENSG00000102030 / ENSRNOG00000060063  
NAA15 / Q9BXJ9 / ENSMUSG00000063273 / ENSG00000164134 / ENSRNOG00000012385  
NAA25 / Q14CX7 / ENSMUSG00000042719 / ENSG00000111300 / ENSRNOG00000001350  
NAA30 / Q147X3 / ENSMUSG00000036282 / ENSG00000139977 / ENSRNOG00000014192  
NAA35 / Q5VZE5 / ENSMUSG00000021555 / ENSG00000135040 / ENSRNOG00000018417  
NAA50 / Q9GZZ1 / ENSMUSG00000022698 / ENSG00000121579 / ENSRNOG00000039017  
NAA80 / Q93015 / ENSMUSG00000079334 / ENSG00000243477 / ENSRNOG00000054063  
NAAA / Q02083 / ENSMUSG00000029413 / ENSG00000138744 / ENSRNOG00000002273  
NAB1 / Q13506 / ENSMUSG00000002881 / ENSG00000138386 / ENSRNOG00000012959  
NACA / E9PAV3 / ENSMUSG00000061315 / ENSG00000196531 / ENSRNOG00000002632  
NACAD / O15069 / ENSMUSG00000041073 / ENSG00000136274 / ENSRNOG00000053875  
NACC1 / Q96RE7 / ENSMUSG00000001910 / ENSG00000160877 / ENSRNOG00000002864  
NACC2 / Q96BF6 / ENSMUSG00000026932 / ENSG00000148411 / ENSRNOG00000018231  
NADK / O95544 / ENSMUSG00000029063 / ENSG00000008130 / ENSRNOG00000016936  
NADK2 / Q4G0N4 / ENSMUSG00000022253 / ENSG00000152620 / ENSRNOG00000054157  
NADSYN1 / Q6IA69 / ENSMUSG00000031090 / ENSG00000172890 / ENSRNOG00000020736  
NAGA / P17050 / ENSMUSG00000022453 / ENSG00000198951 / ENSRNOG00000008064  
NAGK / Q9UJ70 / ENSMUSG00000034744 / ENSG00000124357 / ENSRNOG00000013911  
NAGLU / P54802 / ENSMUSG00000001751 / ENSG00000108784 / ENSRNOG00000032381  
NAGS / Q8N159 / ENSMUSG00000048217 / ENSG00000161653 / ENSRNOG00000020879  
NAMPT / P43490 / ENSMUSG00000020572 / ENSG00000105835 / ENSRNOG00000009754  
NANP / Q8TBE9 / ENSMUSG00000053916 / ENSG00000170191 / ENSRNOG00000008307  
NANS / Q9NR45 / ENSMUSG00000028334 / ENSG00000095380 / ENSRNOG00000008945  
NAP1L1 / P55209 / ENSMUSG00000058799 / ENSG00000187109 / ENSRNOG00000003890  
NAP1L5 / Q96NT1 / ENSMUSG00000055430 / ENSG00000177432 / ENSRNOG00000007808  
NAPA / P54920 / ENSMUSG00000006024 / ENSG00000105402 / ENSRNOG00000001494  
NAPB / Q9H115 / ENSMUSG00000027438 / ENSG00000125814 / ENSRNOG00000004753  
NAPG / Q99747 / ENSMUSG00000024581 / ENSG00000134265 / ENSRNOG00000018914  
NAPSA / O96009 / ENSMUSG00000002204 / ENSG00000131400 / ENSRNOG00000019854  
NARS1 / O43776 / ENSMUSG00000024587 / ENSG00000134440 / ENSRNOG00000017852  
NARS2 / Q96I59 / ENSMUSG00000018995 / ENSG00000137513 / ENSRNOG00000011476

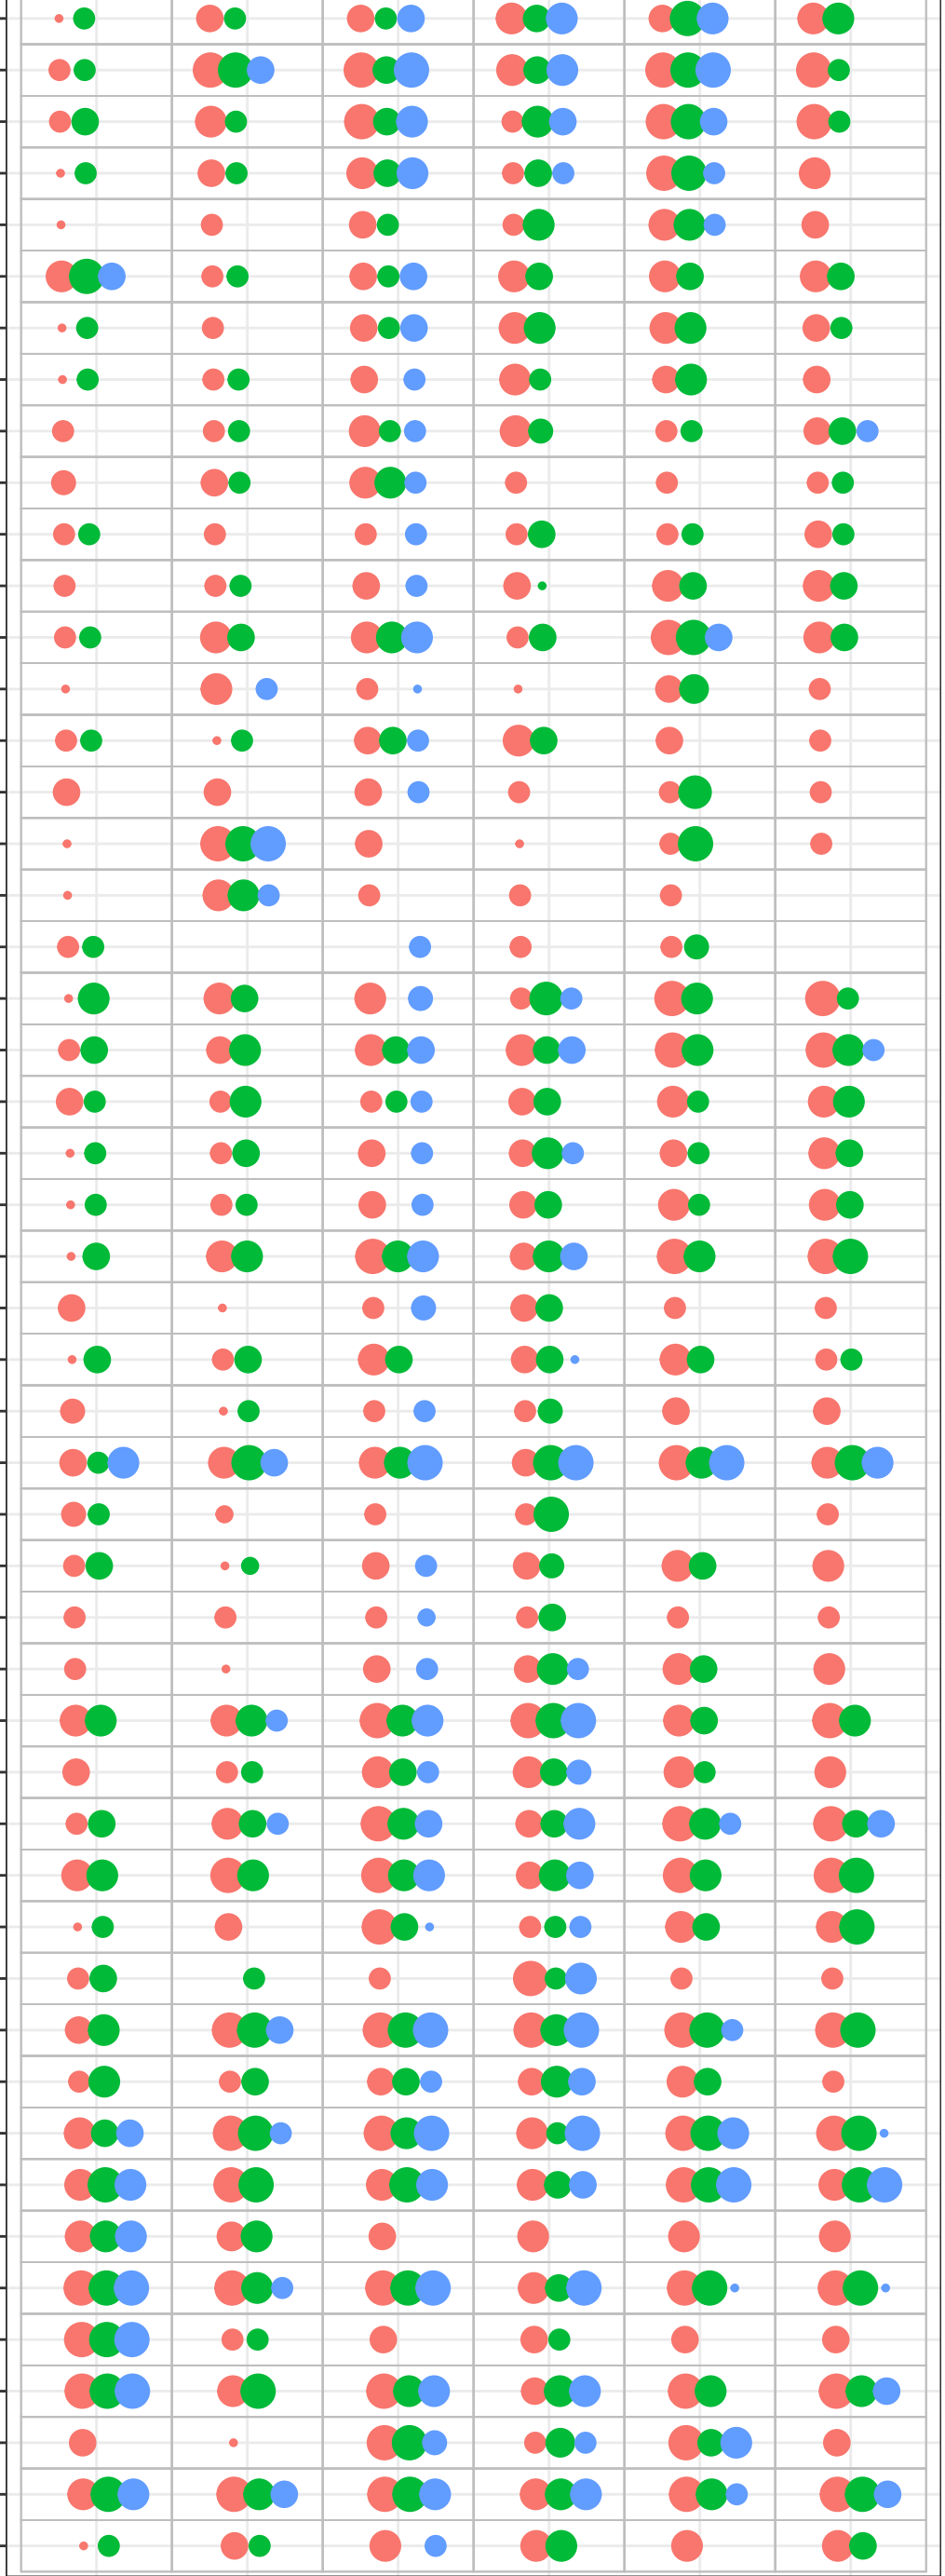

Bins

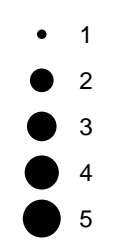

Species



Organs







Homologs

NFXL1 / Q6ZNB6 / ENSMUSG00000072889 / ENSG00000170448 / ENSRNOG00000058588  
NFYA / P23511 / ENSMUSG00000023994 / ENSG00000001167 / ENSRNOG00000012702  
NFYB / P25208 / ENSMUSG00000020248 / ENSG00000120837 / ENSRNOG00000010309  
NFYC / Q13952 / ENSMUSG00000032897 / ENSG00000066136 / ENSRNOG00000010735  
NGEF / Q8N5V2 / ENSMUSG00000026259 / ENSG00000066248 / ENSRNOG00000016653  
NGLY1 / Q96IV0 / ENSMUSG00000021785 / ENSG00000151092 / ENSRNOG00000006143  
NHLRC2 / Q8NBF2 / ENSMUSG00000025078 / ENSG00000196865 / ENSRNOG00000016948  
NHP2 / Q9NX24 / ENSMUSG00000001056 / ENSG00000145912 / ENSRNOG00000004247  
NHSL1 / Q5SYE7 / ENSMUSG00000039835 / ENSG00000135540 / ENSRNOG00000060603  
NIBAN1 / Q9BZQ8 / ENSMUSG00000026483 / ENSG00000135842 / ENSRNOG00000002403  
NIBAN2 / Q96TA1 / ENSMUSG00000026796 / ENSG00000136830 / ENSRNOG00000015845  
NID1 / P14543 / ENSMUSG00000005397 / ENSG00000116962 / ENSRNOG00000002461  
NID2 / Q14112 / ENSMUSG00000021806 / ENSG00000087303 / ENSRNOG00000000341  
NIF3L1 / Q9GZT8 / ENSMUSG00000026036 / ENSG00000196290 / ENSRNOG00000013446  
NIFK / Q9BYG3 / ENSMUSG00000026377 / ENSG00000155438 / ENSRNOG00000025701  
NIN / Q8N4C6 / ENSMUSG00000021068 / ENSG00000100503 / ENSRNOG00000005540  
NINJ1 / Q92982 / ENSMUSG00000037966 / ENSG00000131669 / ENSRNOG00000016587  
NIPSNAP1 / Q9BPW8 / ENSMUSG00000034285 / ENSG00000184117 / ENSRNOG00000008374  
NIPSNAP2 / O75323 / ENSMUSG00000029432 / ENSG00000146729 / ENSRNOG00000023919  
NIT1 / Q86X76 / ENSMUSG00000013997 / ENSG00000158793 / ENSRNOG00000003881  
NIT2 / Q9NQR4 / ENSMUSG00000022751 / ENSG00000114021 / ENSRNOG00000027797  
NKAP / Q8N5F7 / ENSMUSG00000016409 / ENSG00000101882 / ENSRNOG00000053813  
NKIRAS2 / Q9NYR9 / ENSMUSG00000017837 / ENSG00000168256 / ENSRNOG00000018095  
NLE1 / Q9NVX2 / ENSMUSG00000020692 / ENSG00000073536 / ENSRNOG00000008287  
NLGN1 / Q8N2Q7 / ENSMUSG00000063887 / ENSG00000169760 / ENSRNOG00000032576  
NLGN3 / Q9NZ94 / ENSMUSG00000031302 / ENSG00000196338 / ENSRNOG00000003812  
NLN / Q9BYT8 / ENSMUSG00000021710 / ENSG00000123213 / ENSRNOG00000011561  
NLRX1 / Q86UT6 / ENSMUSG00000032109 / ENSG00000160703 / ENSRNOG00000052386  
NME1 / P15531 / ENSMUSG00000037601 / ENSG00000239672 / ENSRNOG00000002693  
NME6 / O75414 / ENSMUSG00000032478 / ENSG00000172113 / ENSRNOG00000020721  
NME7 / Q9Y5B8 / ENSMUSG00000026575 / ENSG00000143156 / ENSRNOG00000002898  
NMNAT1 / Q9HAN9 / ENSMUSG00000028992 / ENSG00000173614 / ENSRNOG00000015962  
NMNAT3 / Q96T66 / ENSMUSG00000032456 / ENSG00000163864 / ENSRNOG00000013585  
NMRK1 / Q9NWW6 / ENSMUSG00000037847 / ENSG00000106733 / ENSRNOG00000012665  
NMT1 / P30419 / ENSMUSG00000020936 / ENSG00000136448 / ENSRNOG00000002989  
NNMT / P40261 / ENSMUSG00000032271 / ENSG00000166741 / ENSRNOG00000005930  
NNT / Q13423 / ENSMUSG00000025453 / ENSG00000112992 / ENSRNOG00000026842  
NOA1 / Q8NC60 / ENSMUSG00000036285 / ENSG00000084092 / ENSRNOG00000002055  
NOB1 / Q9ULX3 / ENSMUSG00000003848 / ENSG00000141101 / ENSRNOG00000021890  
NOL10 / Q9BSC4 / ENSMUSG00000061458 / ENSG00000115761 / ENSRNOG00000005344  
NOL3 / O60936 / ENSMUSG00000014776 / ENSG00000140939 / ENSRNOG00000015588  
NOL6 / Q9H6R4 / ENSMUSG00000028430 / ENSG00000165271 / ENSRNOG00000010409  
NOL9 / Q5SY16 / ENSMUSG00000028948 / ENSG00000162408 / ENSRNOG00000010109  
NOLC1 / Q14978 / ENSMUSG00000015176 / ENSG00000166197 / ENSRNOG00000018704  
NONO / Q15233 / ENSMUSG00000031311 / ENSG00000147140 / ENSRNOG00000003689  
NOP10 / Q9NPE3 / ENSMUSG00000027133 / ENSG00000182117 / ENSRNOG00000005184  
NOP14 / P78316 / ENSMUSG00000036693 / ENSG00000087269 / ENSRNOG00000012147  
NOP16 / Q9Y3C1 / ENSMUSG00000025869 / ENSG00000048162 / ENSRNOG00000017284  
NOP2 / P46087 / ENSMUSG00000038279 / ENSG00000111641 / ENSRNOG00000018453  
NOP56 / O00567 / ENSMUSG00000027405 / ENSG00000101361 / ENSRNOG00000007128

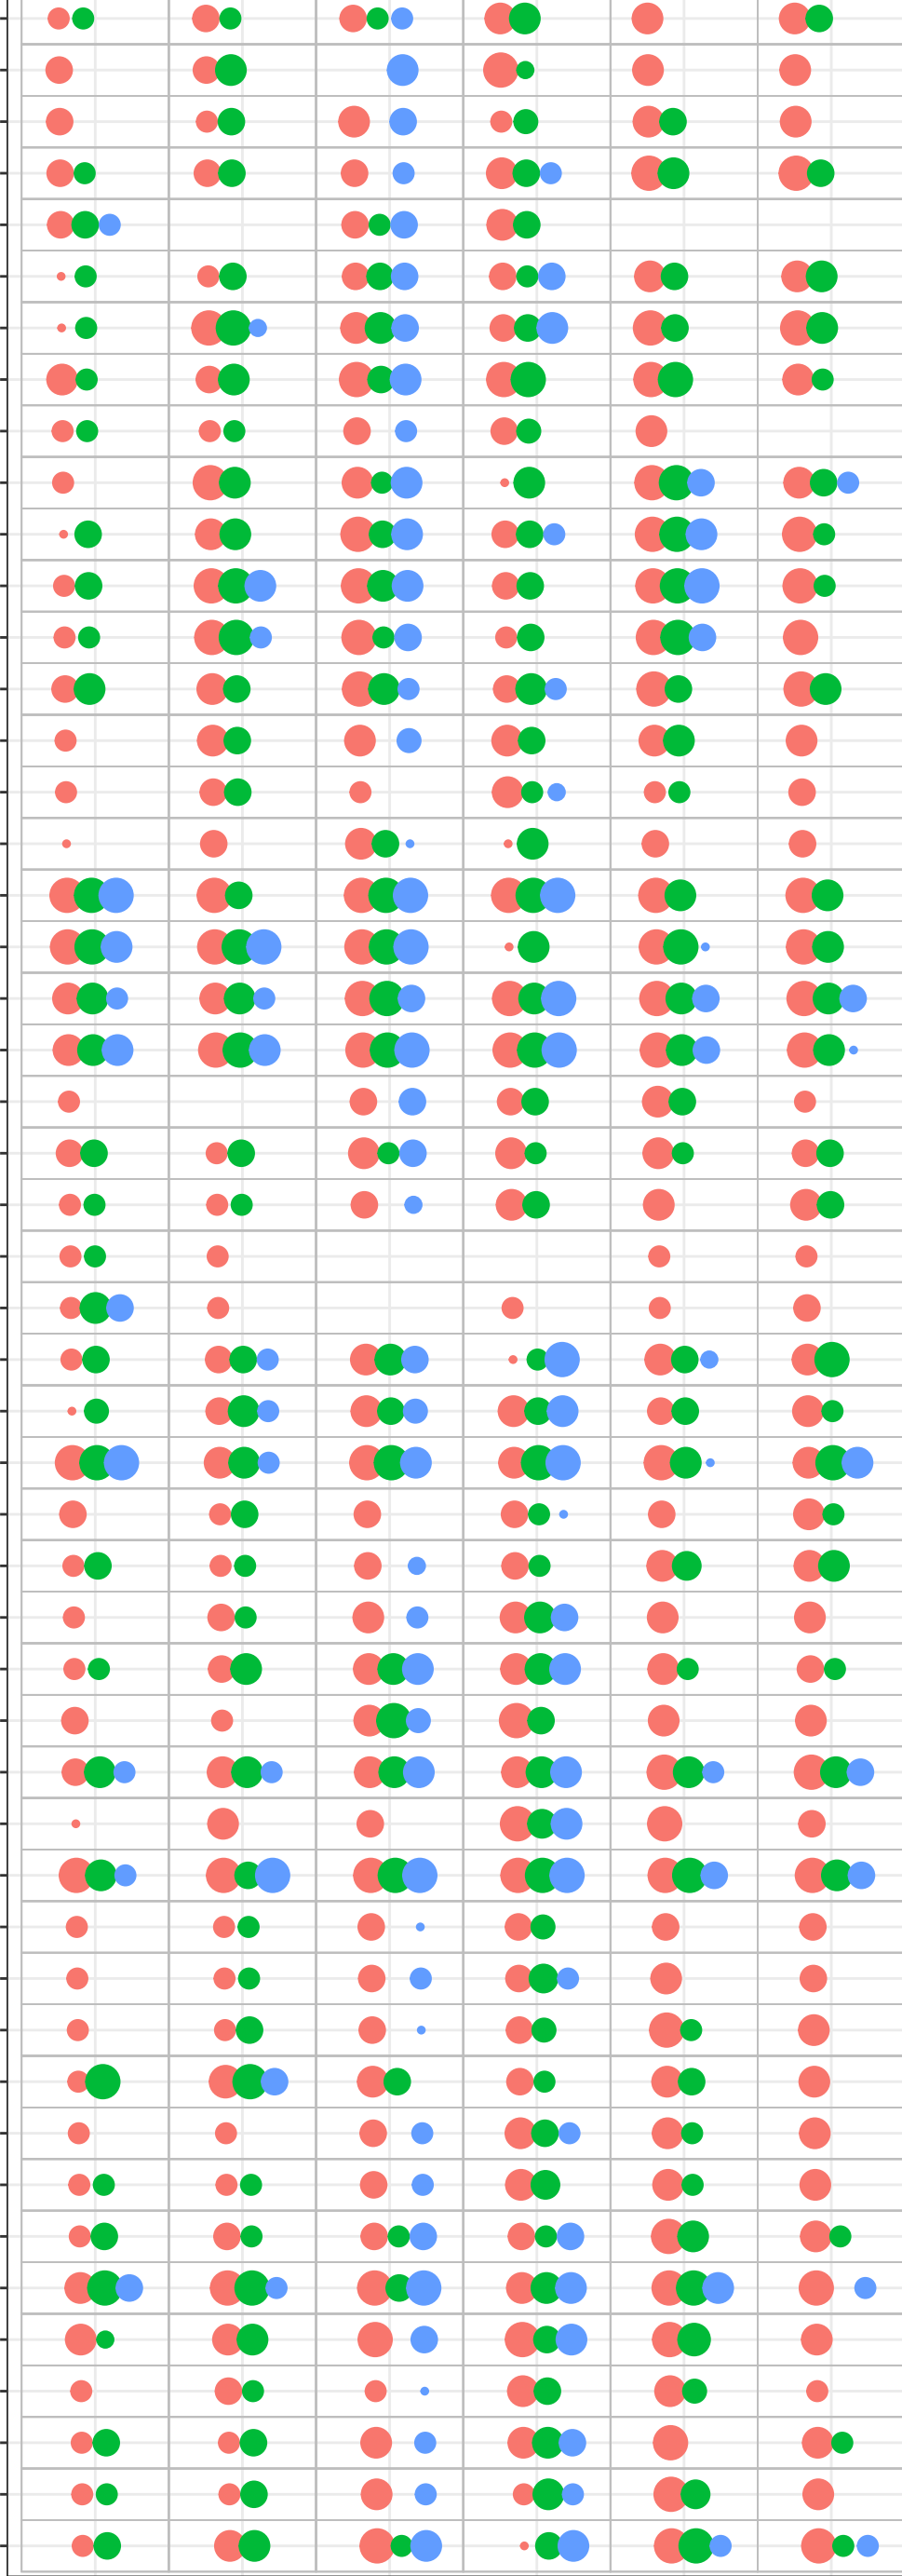

Bins



Species



Organs

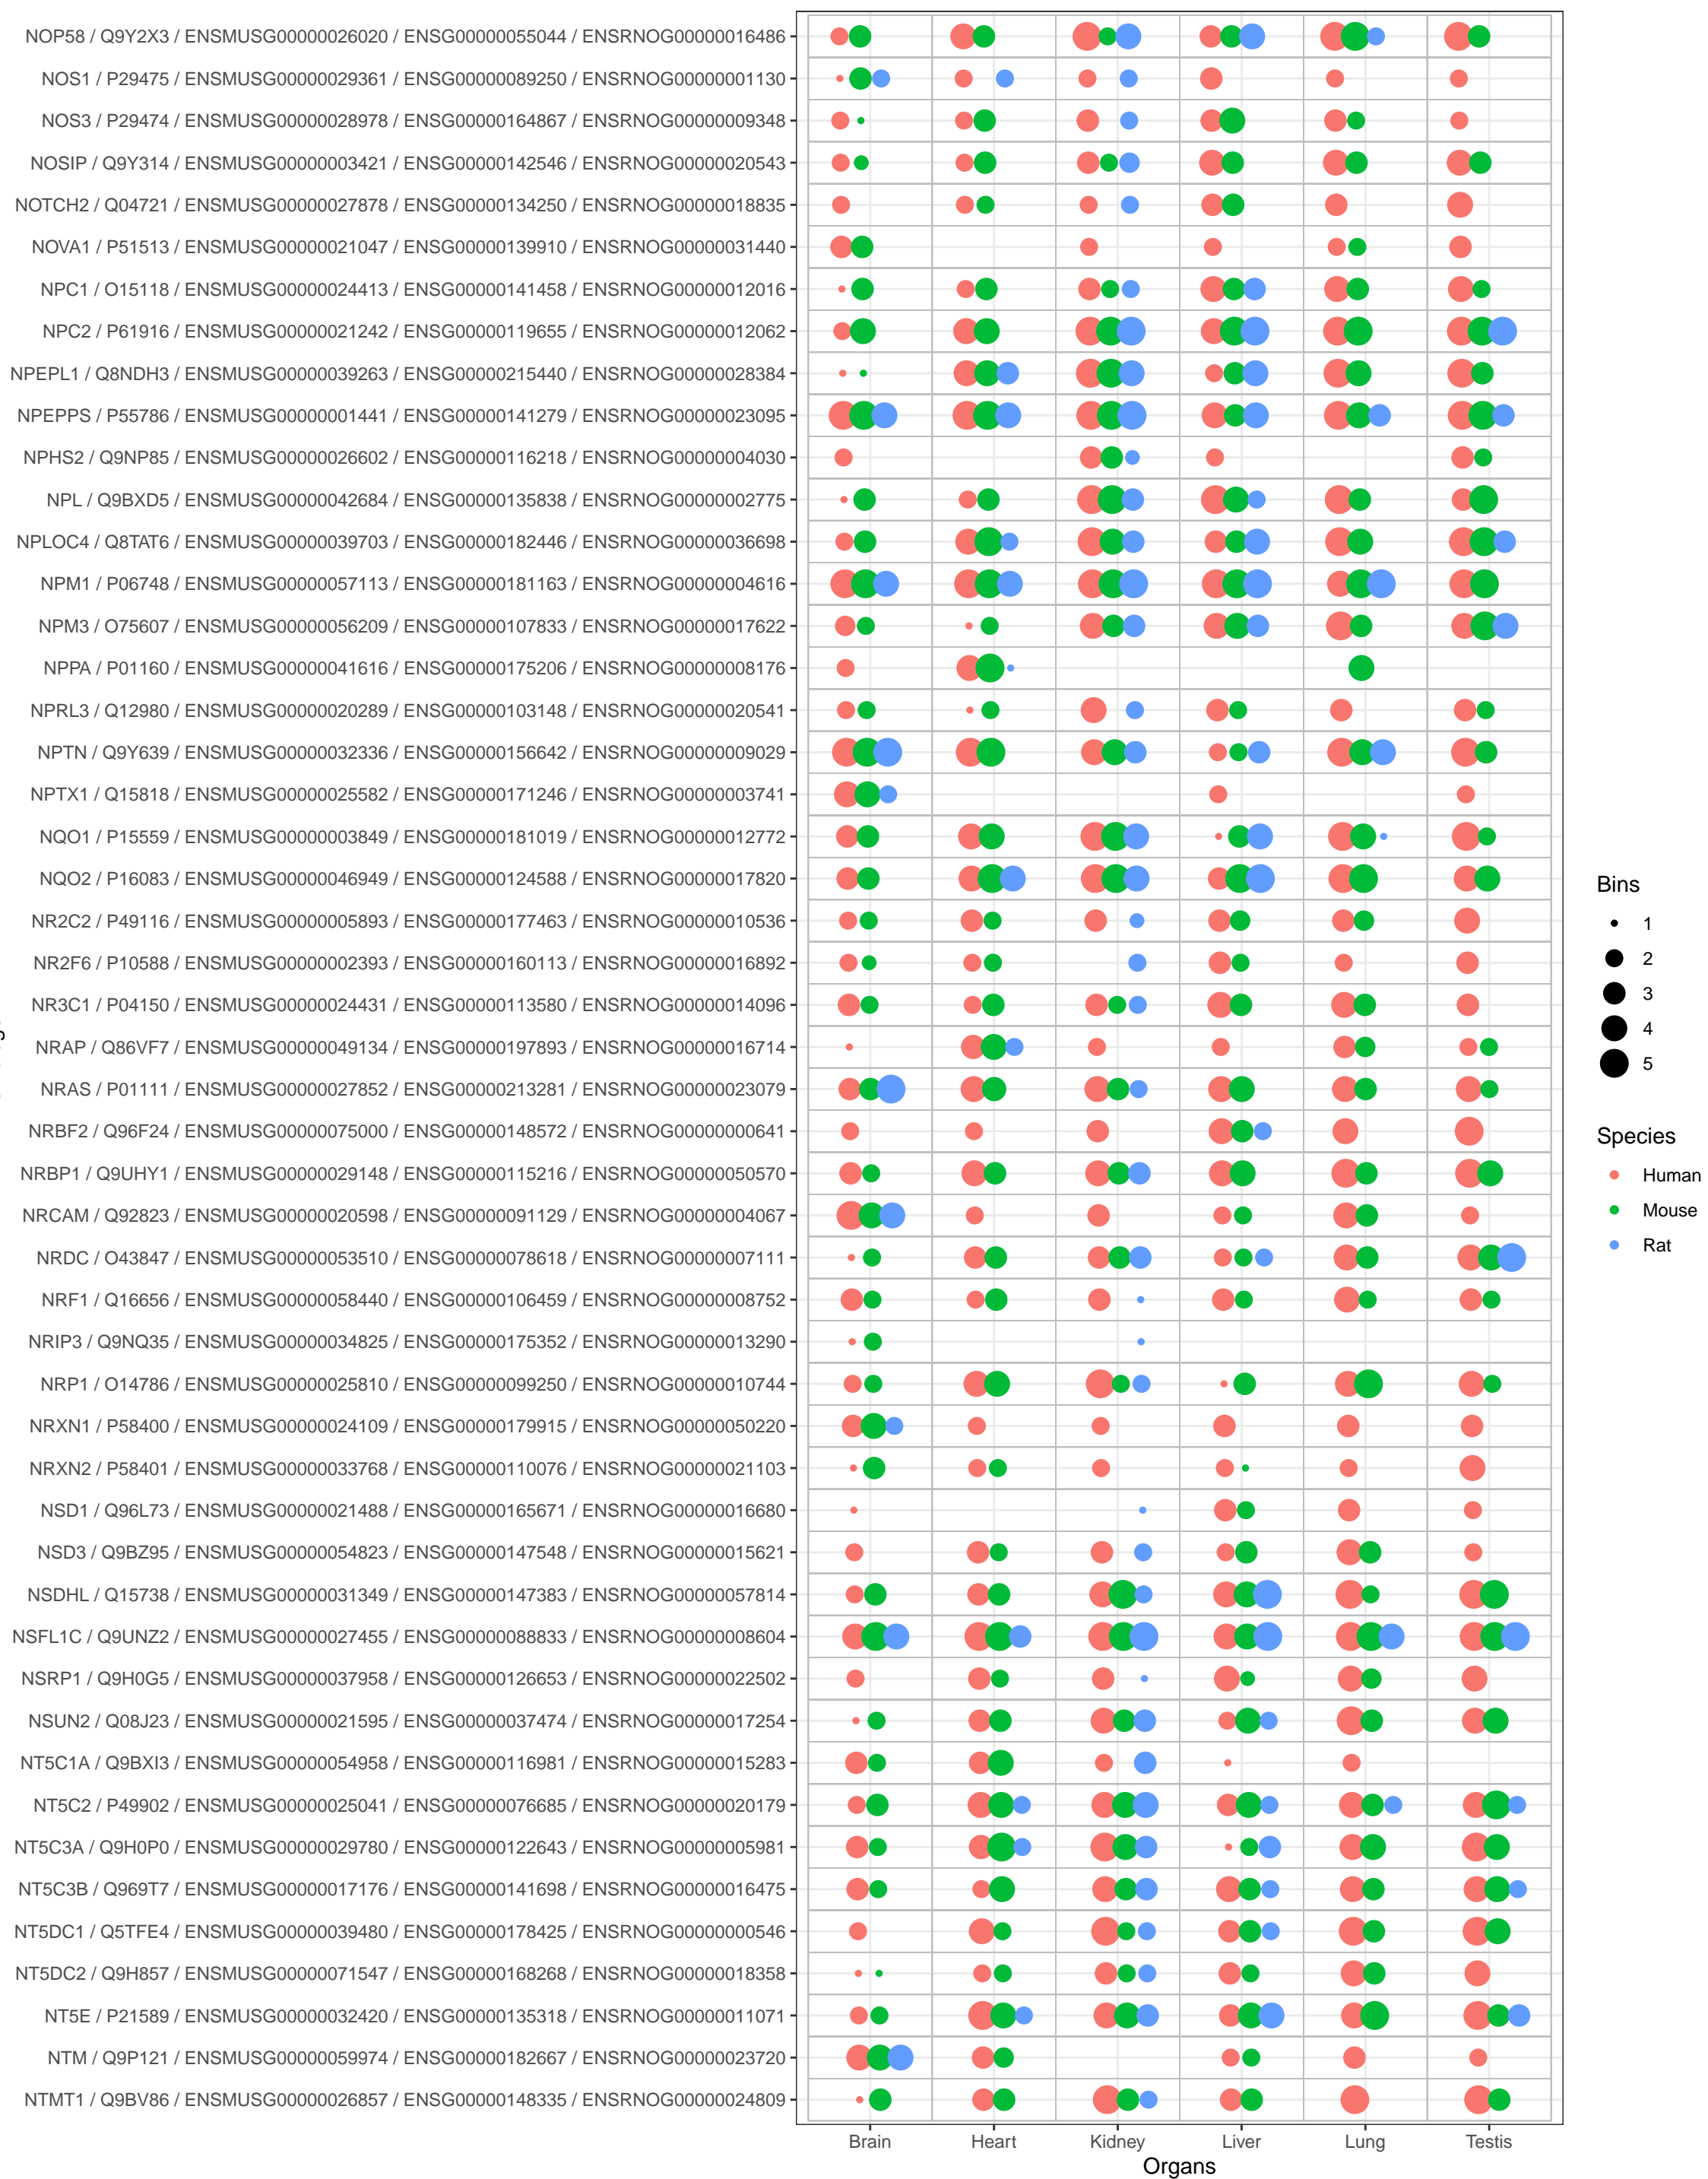

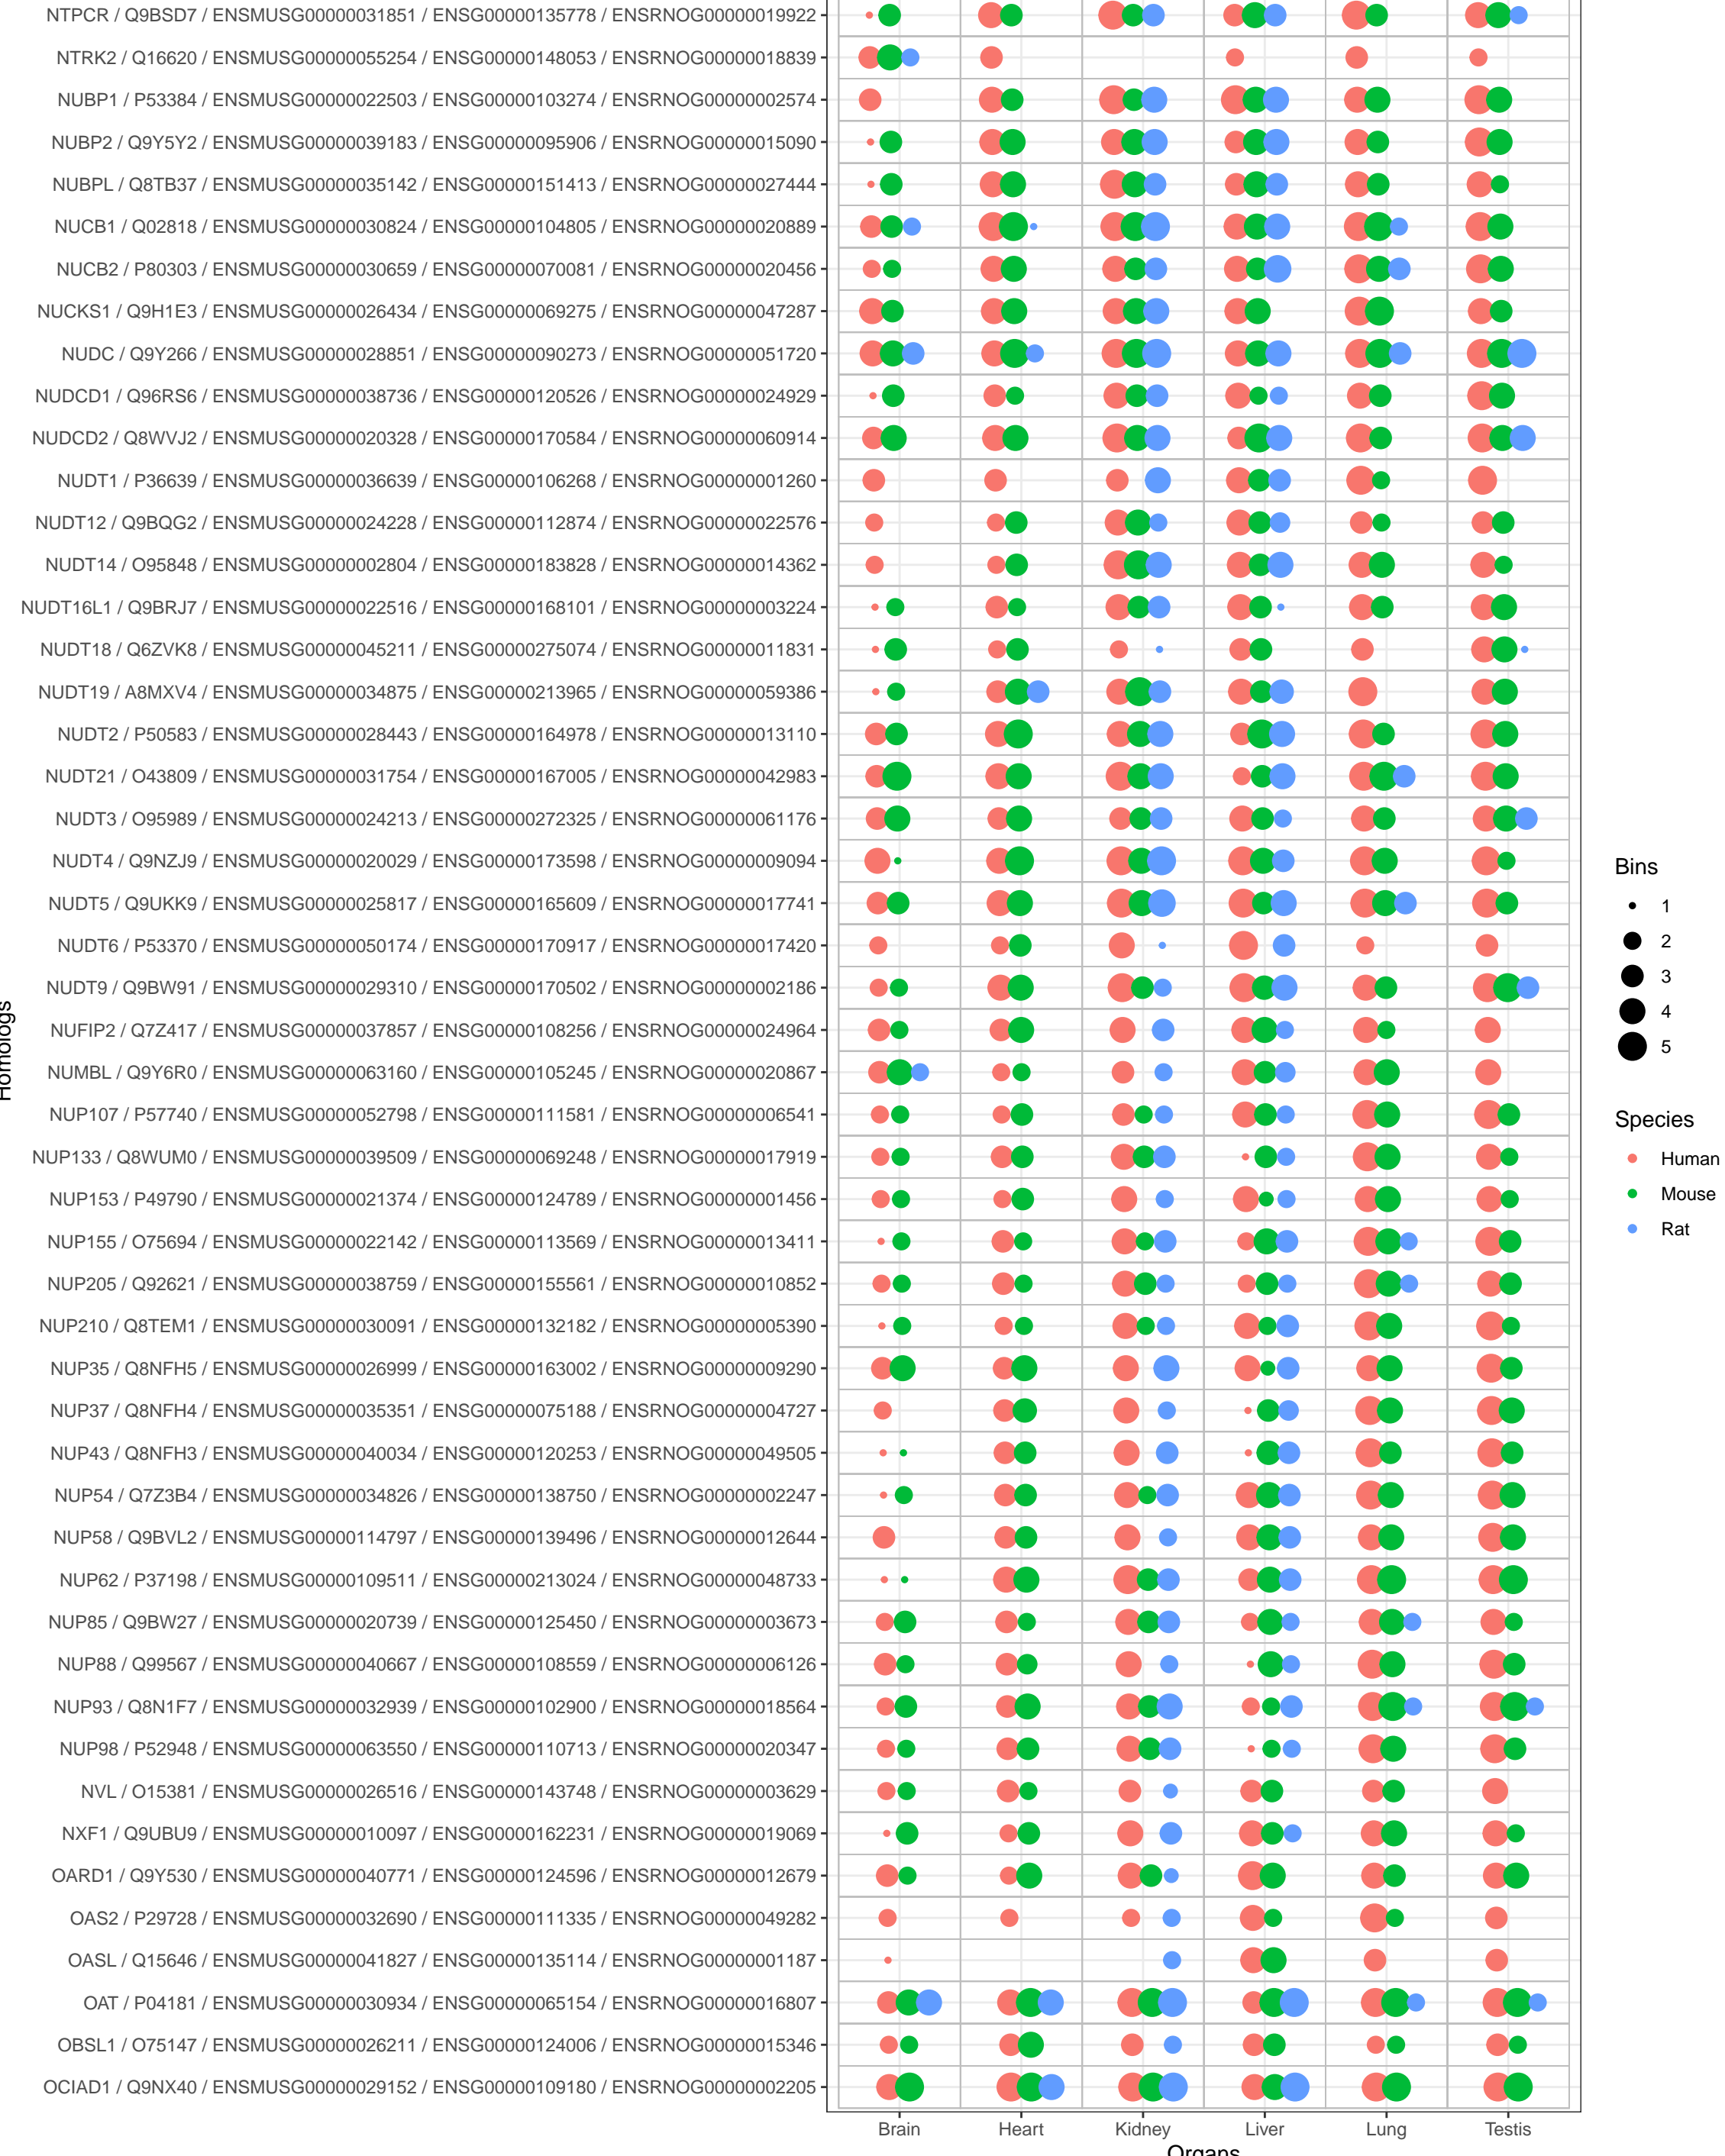

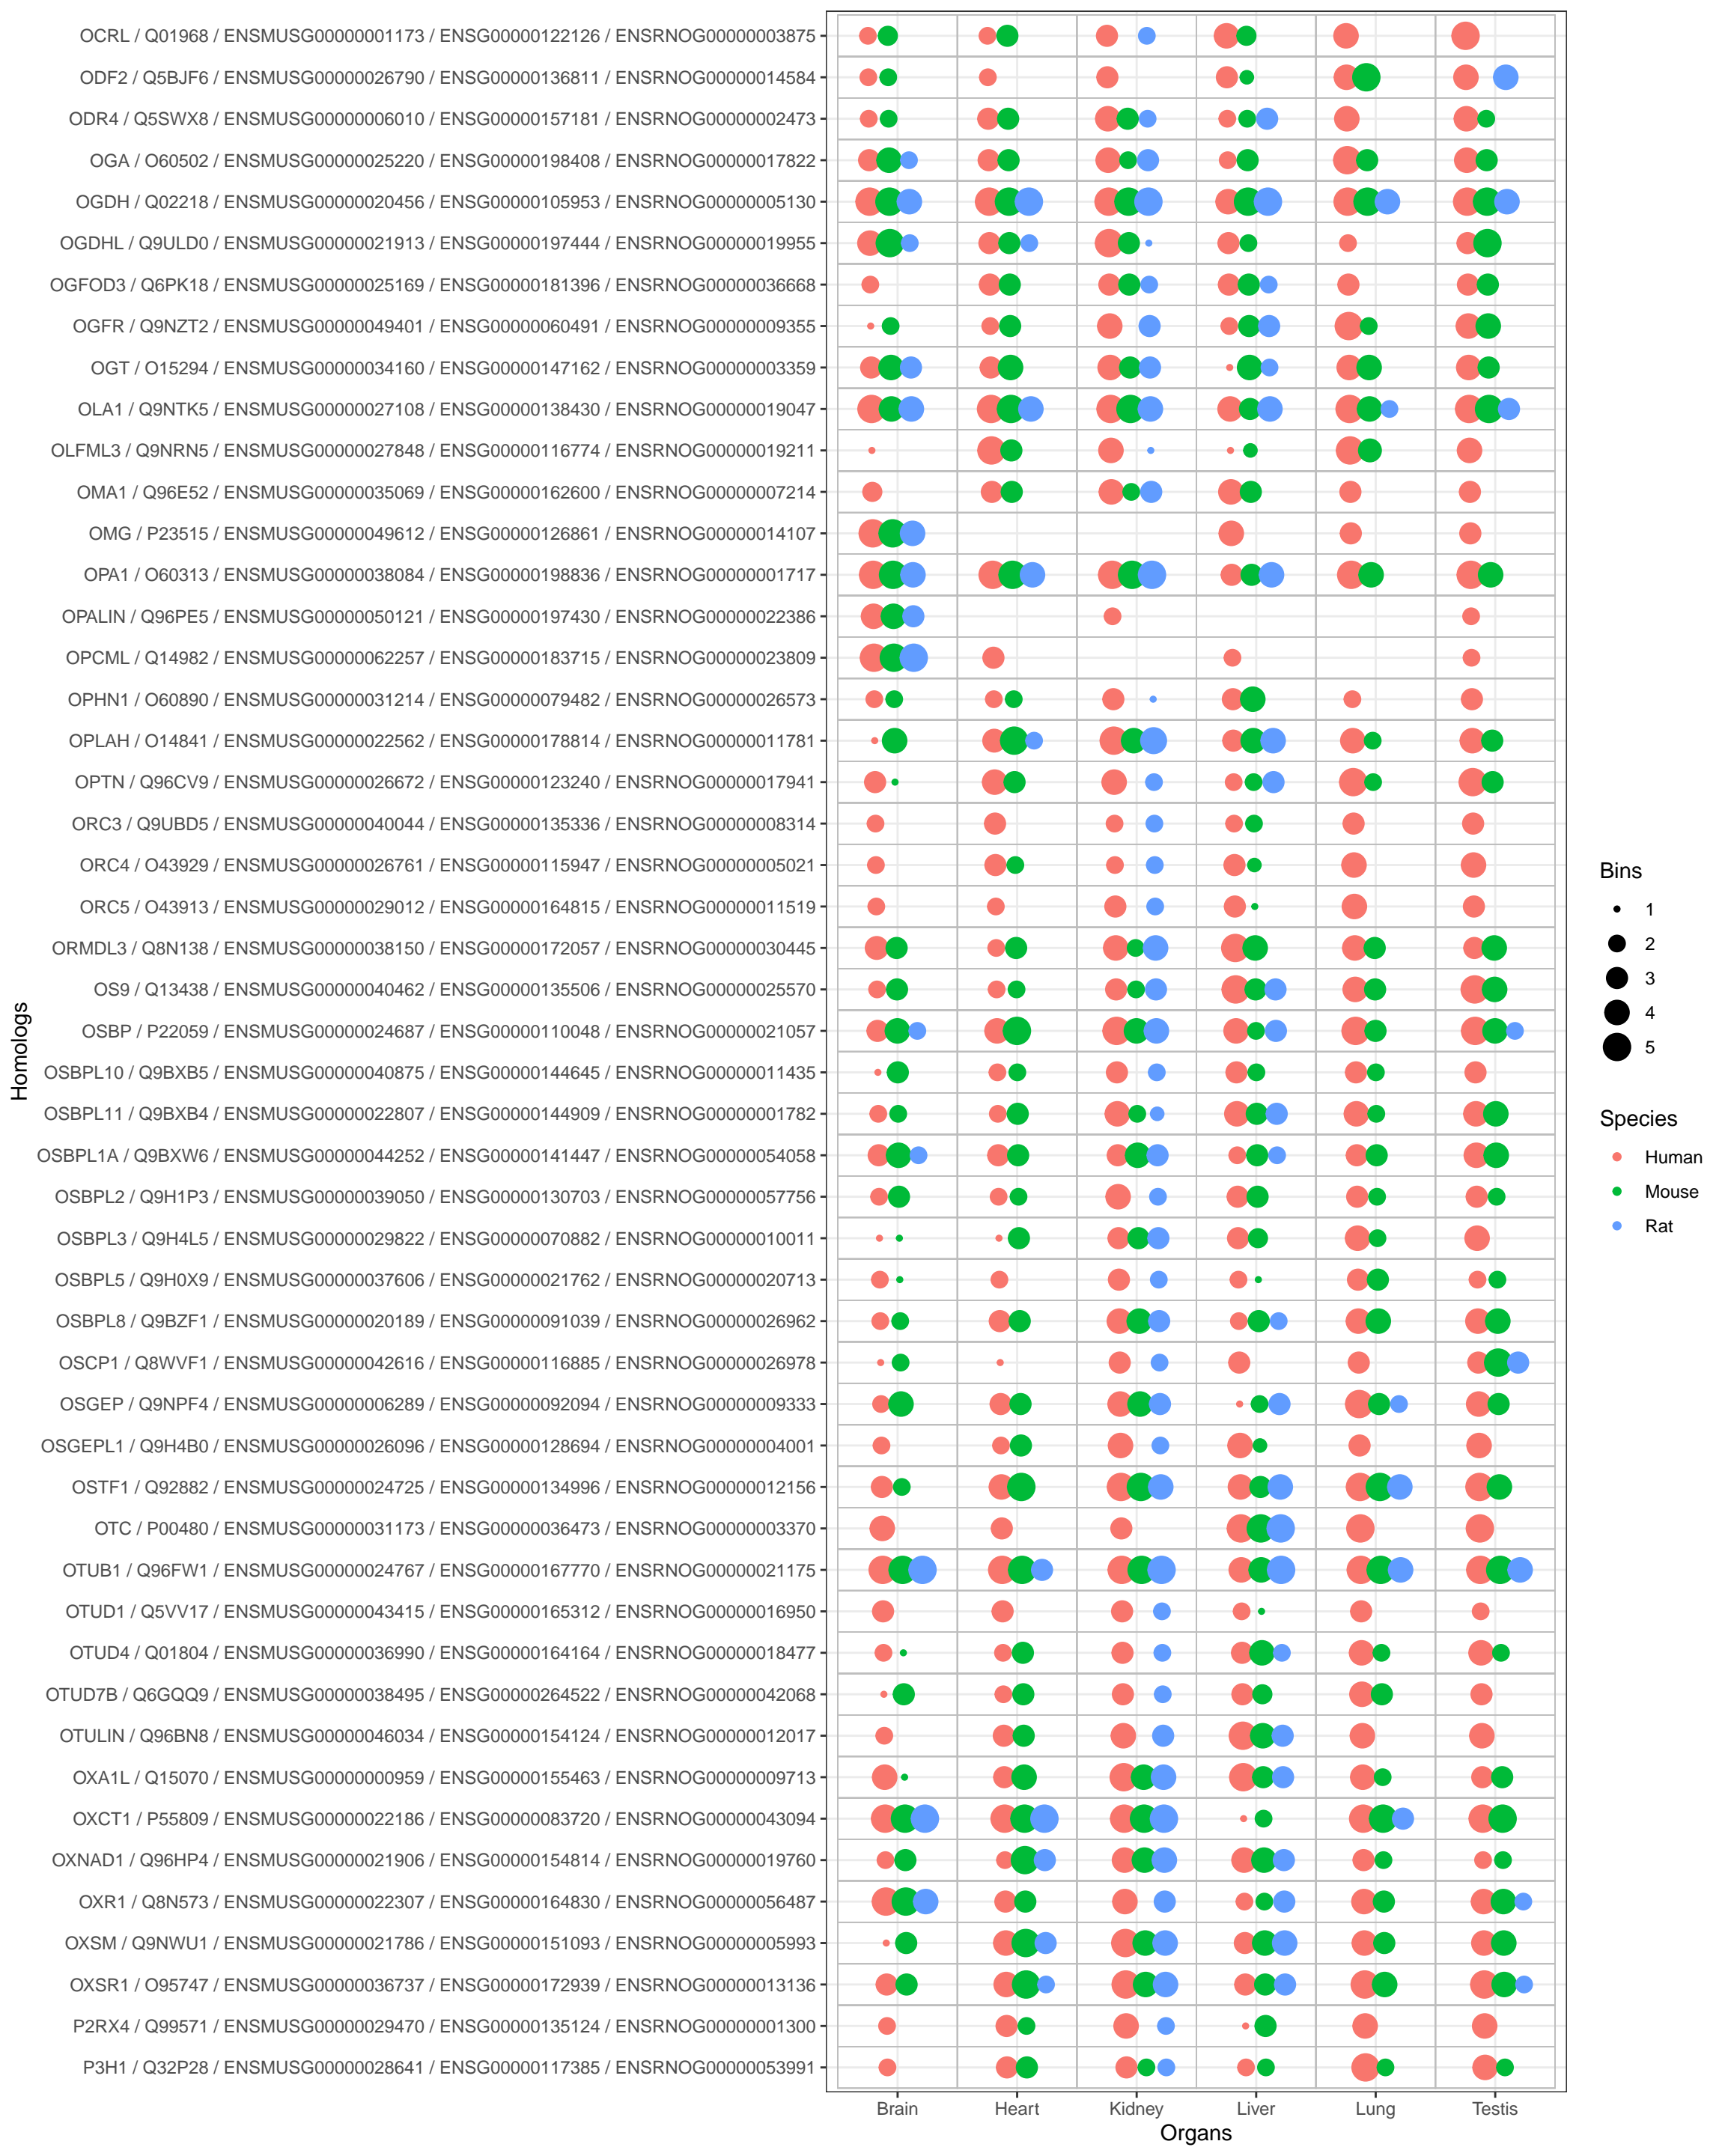

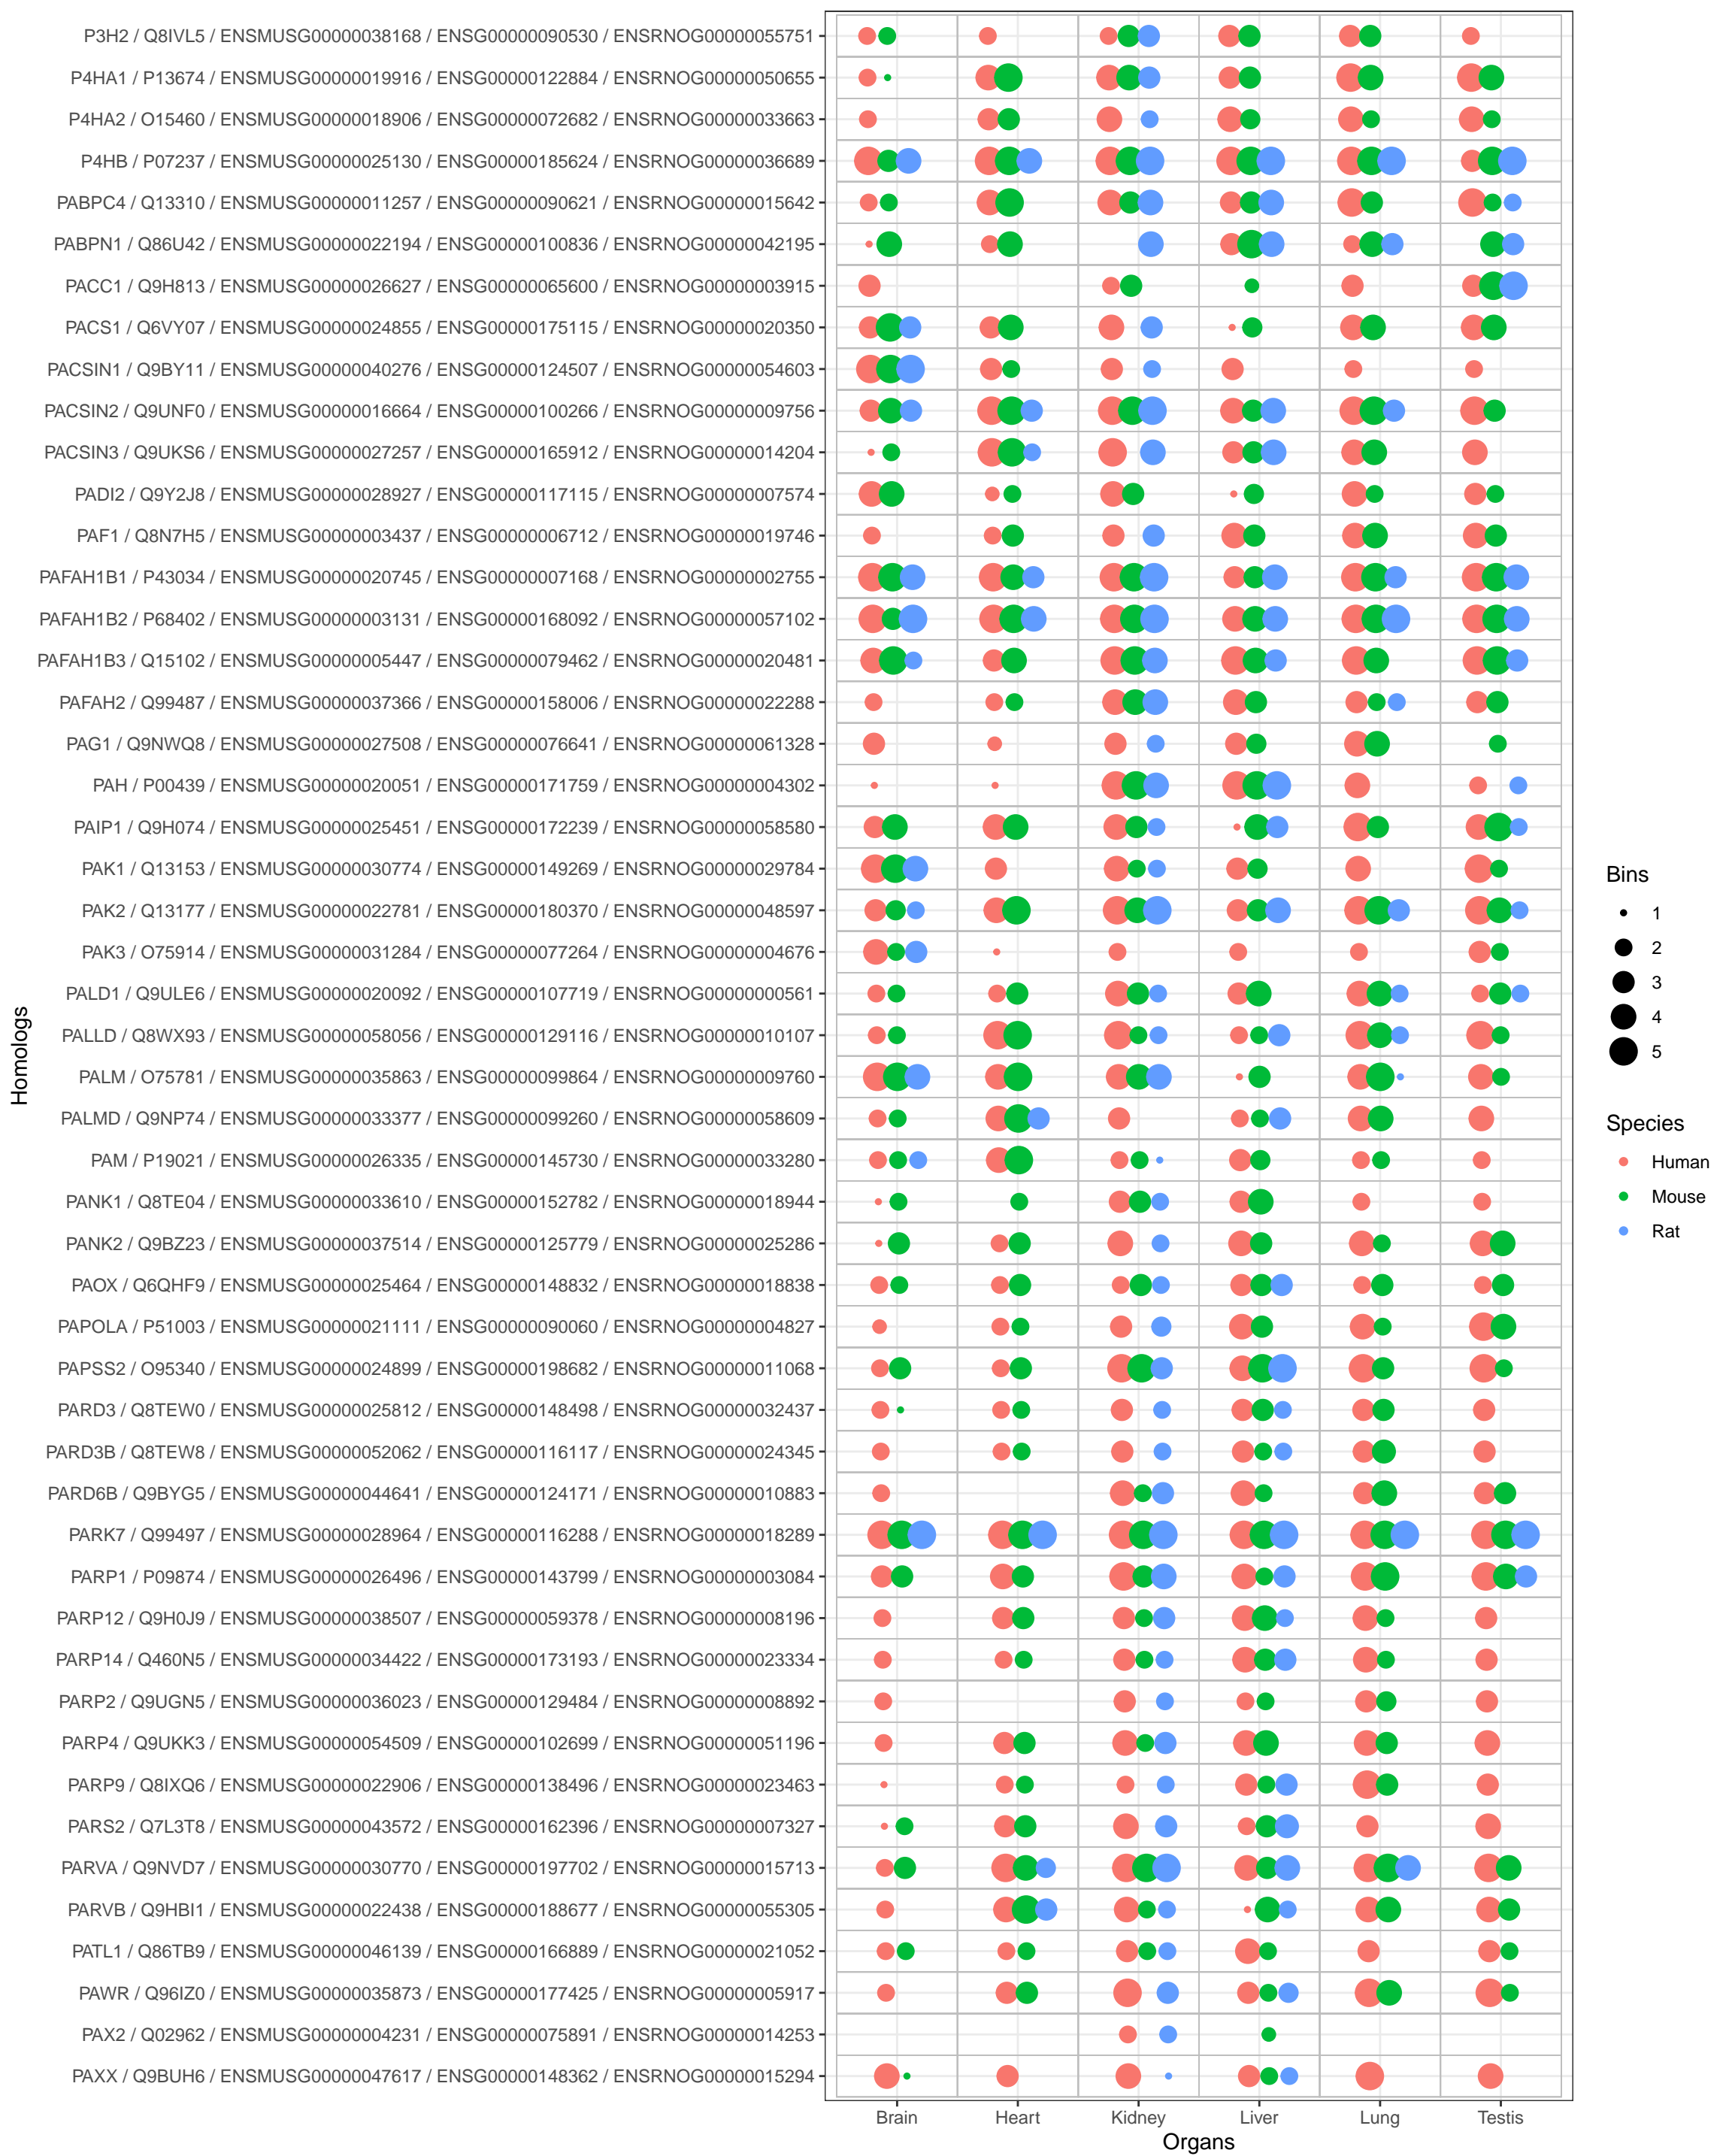





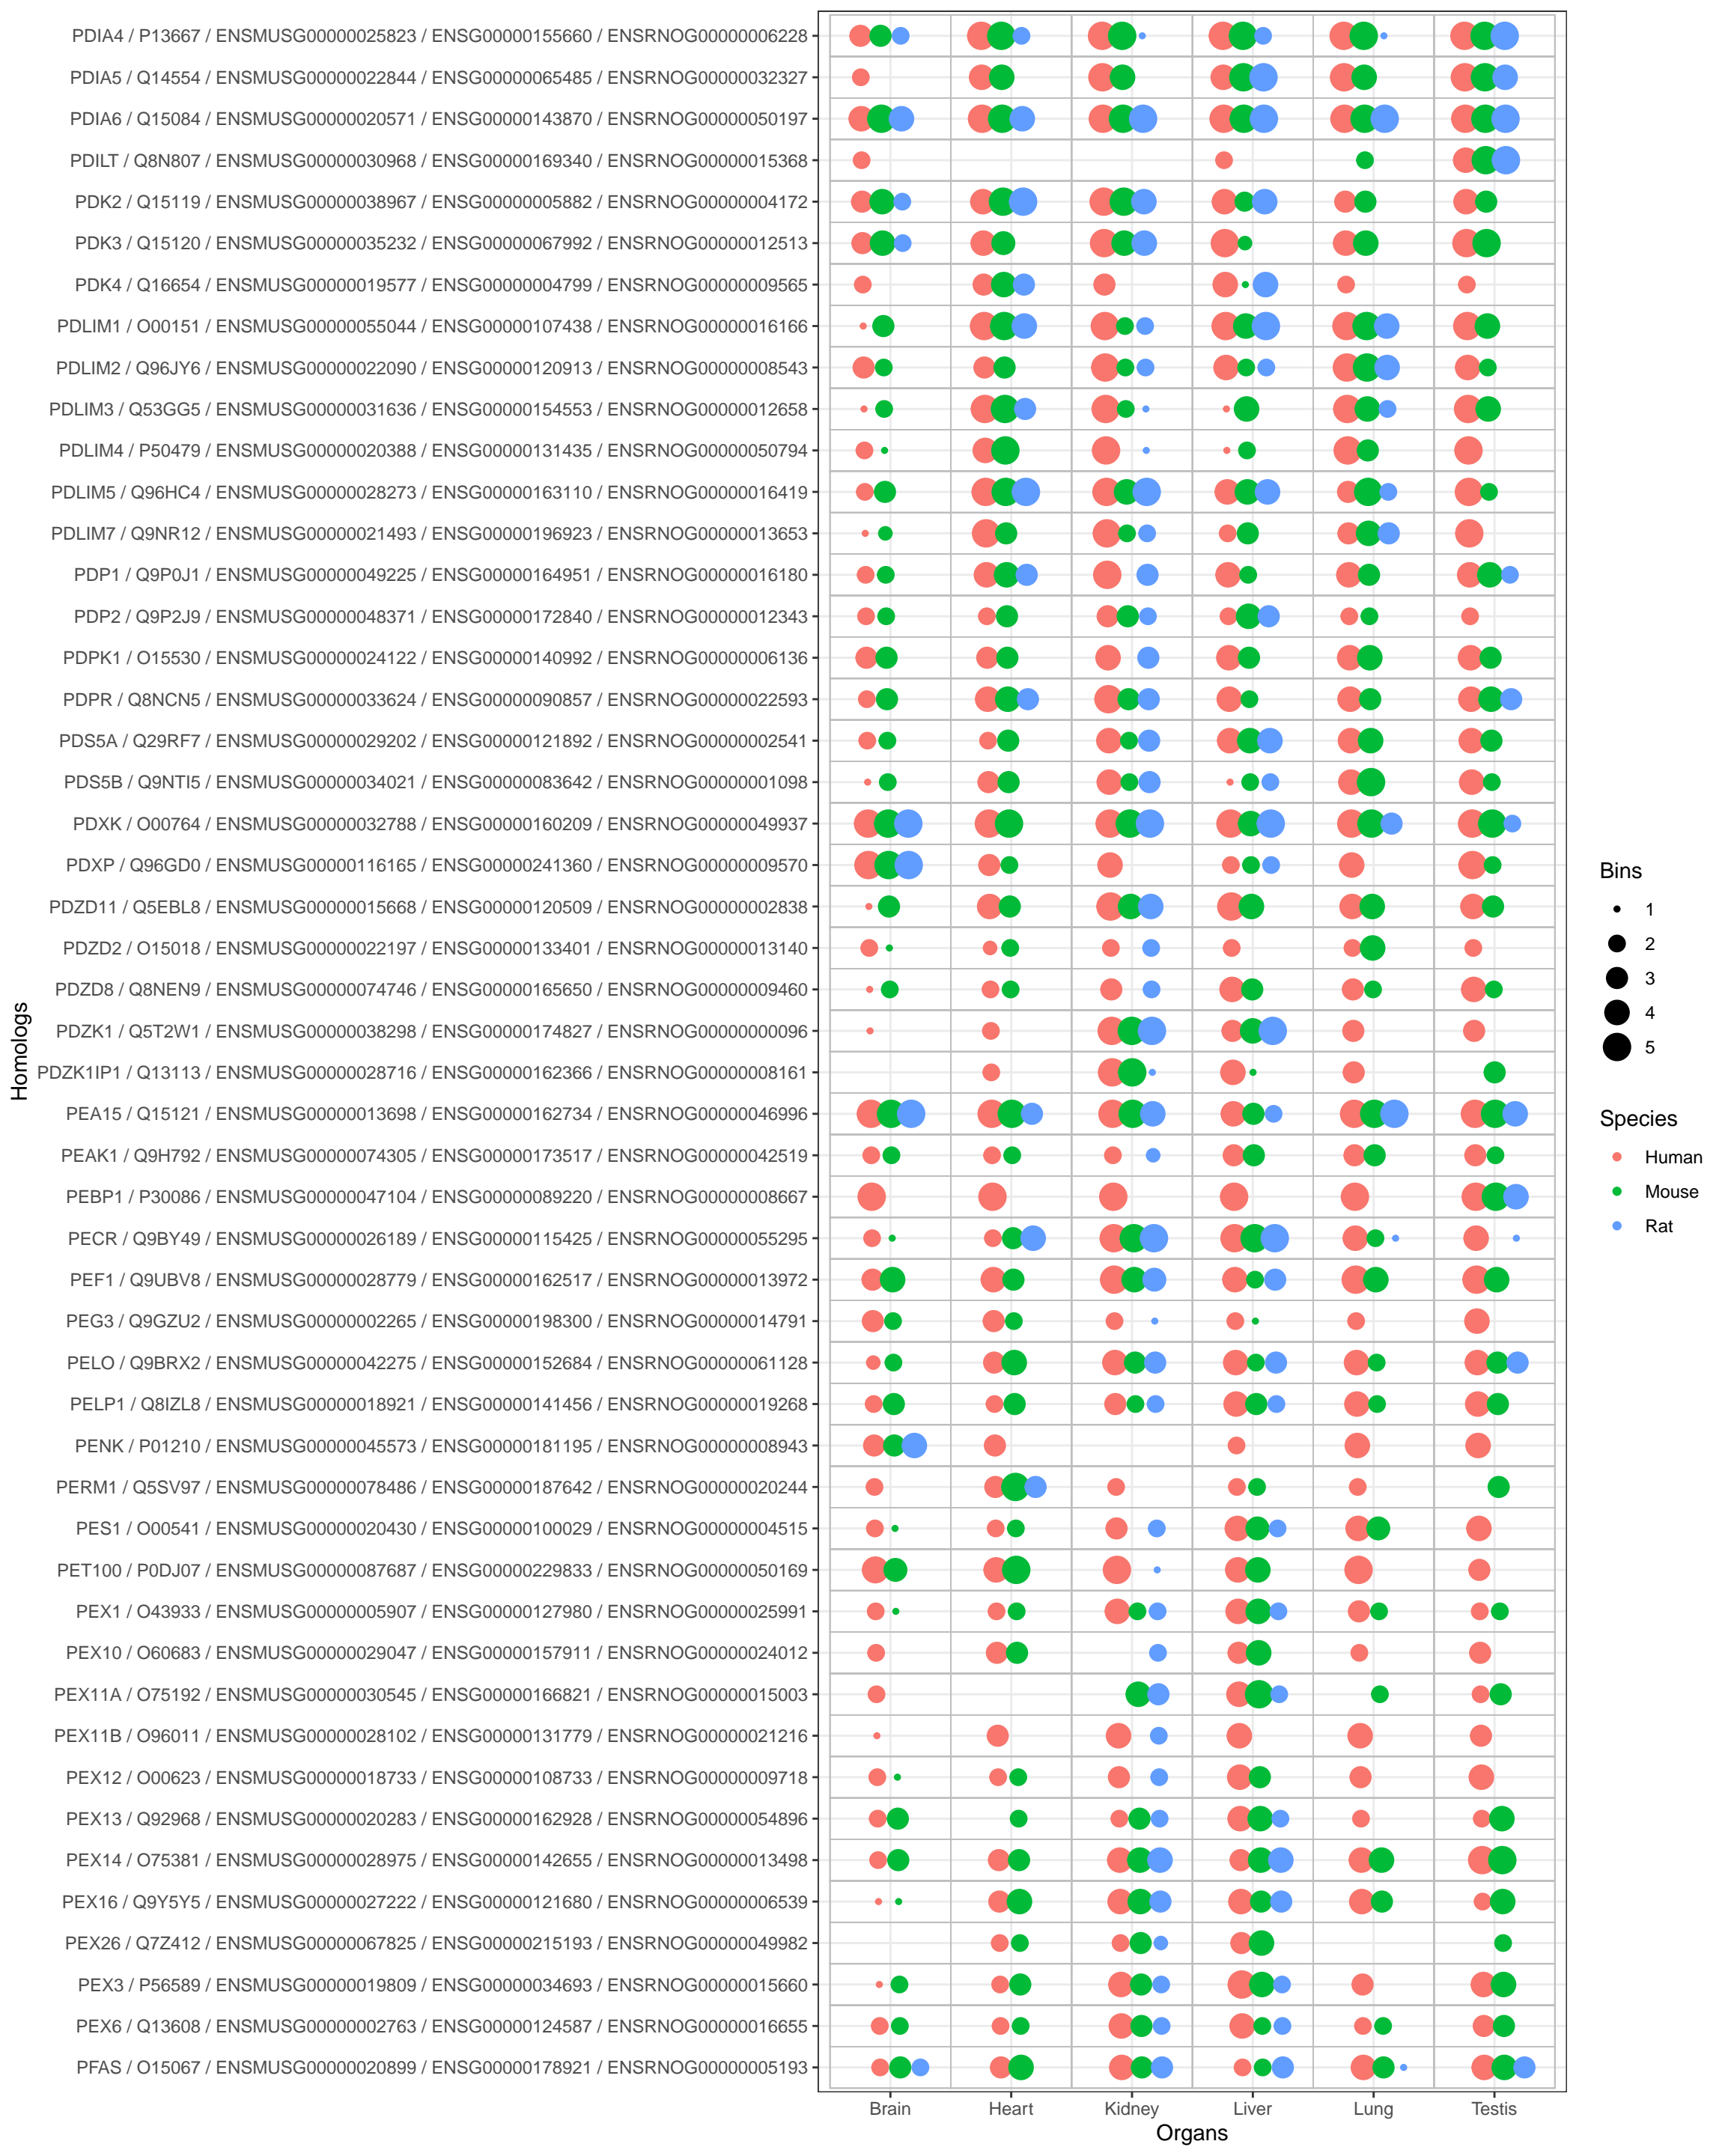

Homologs

PFDN1 / O60925 / ENSMUSG00000024346 / ENSG00000113068 / ENSRNOG00000018653  
PFDN2 / Q9UHV9 / ENSMUSG00000006412 / ENSG00000143256 / ENSRNOG00000003983  
PFDN4 / Q9NQP4 / ENSMUSG00000052033 / ENSG00000101132 / ENSRNOG00000050932  
PFDN5 / Q99471 / ENSMUSG00000001289 / ENSG00000123349 / ENSRNOG00000012985  
PFKFB1 / P16118 / ENSMUSG00000025271 / ENSG00000158571 / ENSRNOG00000000165  
PFKFB2 / O60825 / ENSMUSG00000026409 / ENSG00000123836 / ENSRNOG00000004162  
PFKFB3 / Q16875 / ENSMUSG00000026773 / ENSG00000170525 / ENSRNOG00000018911  
PFKFB4 / Q16877 / ENSMUSG00000025648 / ENSG00000114268 / ENSRNOG00000020656  
PFKL / P17858 / ENSMUSG00000020277 / ENSG00000141959 / ENSRNOG00000001214  
PFKM / P08237 / ENSMUSG00000033065 / ENSG00000152556 / ENSRNOG00000057988  
PFKP / Q01813 / ENSMUSG00000021196 / ENSG00000067057 / ENSRNOG00000017163  
PFN1 / P07737 / ENSMUSG00000018293 / ENSG00000108518 / ENSRNOG00000003975  
PFN2 / P35080 / ENSMUSG00000027805 / ENSG00000070087 / ENSRNOG00000017427  
PFN3 / P60673 / ENSMUSG00000044444 / ENSG00000196570 / ENSRNOG00000047752  
PGAM2 / P15259 / ENSMUSG00000020475 / ENSG00000164708 / ENSRNOG00000013532  
PGAM5 / Q96HS1 / ENSMUSG00000029500 / ENSG00000247077 / ENSRNOG00000037443  
PGAP1 / Q75T13 / ENSMUSG00000073678 / ENSG00000197121 / ENSRNOG00000013388  
PGGHG / Q32M88 / ENSMUSG00000062031 / ENSG00000142102 / ENSRNOG00000014783  
PGGT1B / P53609 / ENSMUSG00000024477 / ENSG00000164219 / ENSRNOG00000003541  
PGK1 / P00558 / ENSMUSG00000062070 / ENSG00000102144 / ENSRNOG00000058249  
PGK2 / P07205 / ENSMUSG00000031233 / ENSG00000170950 / ENSRNOG00000013600  
PGLS / O95336 / ENSMUSG00000031807 / ENSG00000130313 / ENSRNOG00000018326  
PGM1 / P36871 / ENSMUSG00000025791 / ENSG00000079739 / ENSRNOG00000009889  
PGM2 / Q96G03 / ENSMUSG00000029171 / ENSG00000169299 / ENSRNOG00000002185  
PGM2L1 / Q6PCE3 / ENSMUSG00000030729 / ENSG00000165434 / ENSRNOG00000017079  
PGM3 / O95394 / ENSMUSG00000056131 / ENSG00000013375 / ENSRNOG00000009515  
PGP / A6NDG6 / ENSMUSG00000043445 / ENSG00000184207 / ENSRNOG00000009536  
PGPEP1 / Q9NXJ5 / ENSMUSG00000056204 / ENSG00000130517 / ENSRNOG00000019639  
PGRMC1 / O00264 / ENSMUSG00000006373 / ENSG00000101856 / ENSRNOG00000012786  
PGRMC2 / O15173 / ENSMUSG00000049940 / ENSG00000164040 / ENSRNOG00000014051  
PHACTR2 / O75167 / ENSMUSG00000062866 / ENSG00000112419 / ENSRNOG00000015473  
PHAX / Q9H814 / ENSMUSG00000008301 / ENSG00000164902 / ENSRNOG00000014459  
PHB2 / Q99623 / ENSMUSG00000004264 / ENSG00000215021 / ENSRNOG00000012999  
PHF11 / Q9UIL8 / ENSMUSG00000068245 / ENSG00000136147 / ENSRNOG00000053891  
PHF14 / O94880 / ENSMUSG00000029629 / ENSG00000106443 / ENSRNOG00000005775  
PHF2 / O75151 / ENSMUSG00000038025 / ENSG00000197724 / ENSRNOG00000016816  
PHF24 / Q9UPV7 / ENSMUSG00000036062 / ENSG00000122733 / ENSRNOG00000000129  
PHF3 / Q92576 / ENSMUSG00000048874 / ENSG00000118482 / ENSRNOG00000011756  
PHF5A / Q7RTV0 / ENSMUSG00000061360 / ENSG00000100410 / ENSRNOG00000024170  
PHGDH / O43175 / ENSMUSG00000053398 / ENSG00000092621 / ENSRNOG00000019328  
PHKA1 / P46020 / ENSMUSG00000034055 / ENSG00000067177 / ENSRNOG00000003063  
PHKA2 / P46019 / ENSMUSG00000031295 / ENSG00000044446 / ENSRNOG00000003949  
PHKB / Q93100 / ENSMUSG00000036879 / ENSG00000102893 / ENSRNOG00000024101  
PHKG2 / P15735 / ENSMUSG00000030815 / ENSG00000156873 / ENSRNOG00000018725  
PHLDB1 / Q86UU1 / ENSMUSG00000048537 / ENSG00000019144 / ENSRNOG00000026985  
PHOSPHO1 / Q8TCT1 / ENSMUSG00000050860 / ENSG00000173868 / ENSRNOG00000005569  
PHPT1 / Q9NWX4 / ENSMUSG00000036504 / ENSG00000054148 / ENSRNOG00000016723  
PHYH / O14832 / ENSMUSG00000026664 / ENSG00000107537 / ENSRNOG00000018044  
PHYHD1 / Q5SRE7 / ENSMUSG00000079484 / ENSG00000175287 / ENSRNOG00000016794  
PHYHIPL / Q96FC7 / ENSMUSG00000037747 / ENSG00000165443 / ENSRNOG00000000274

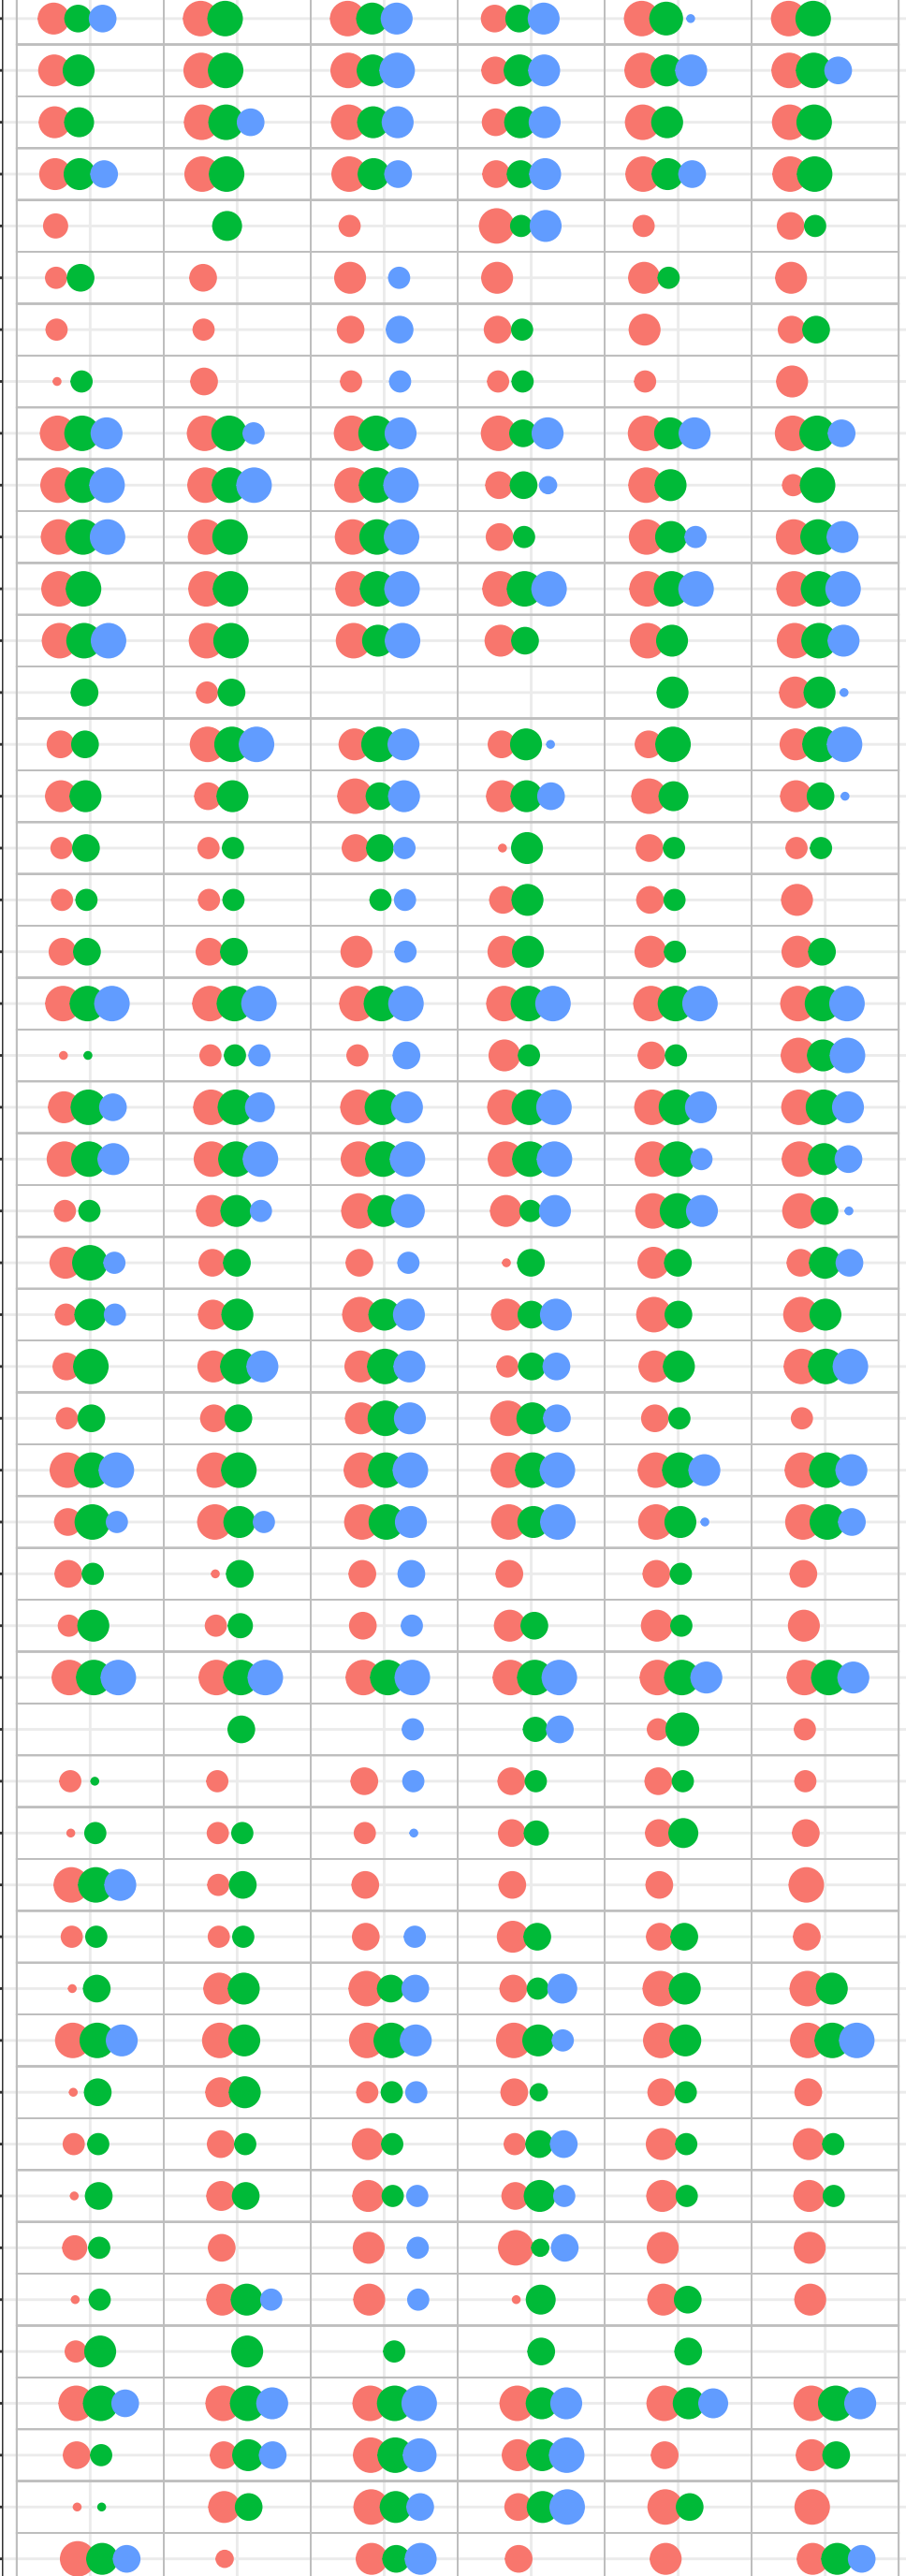

Bins

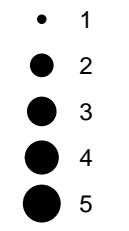

Species

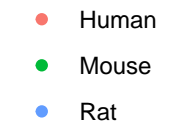

Organs

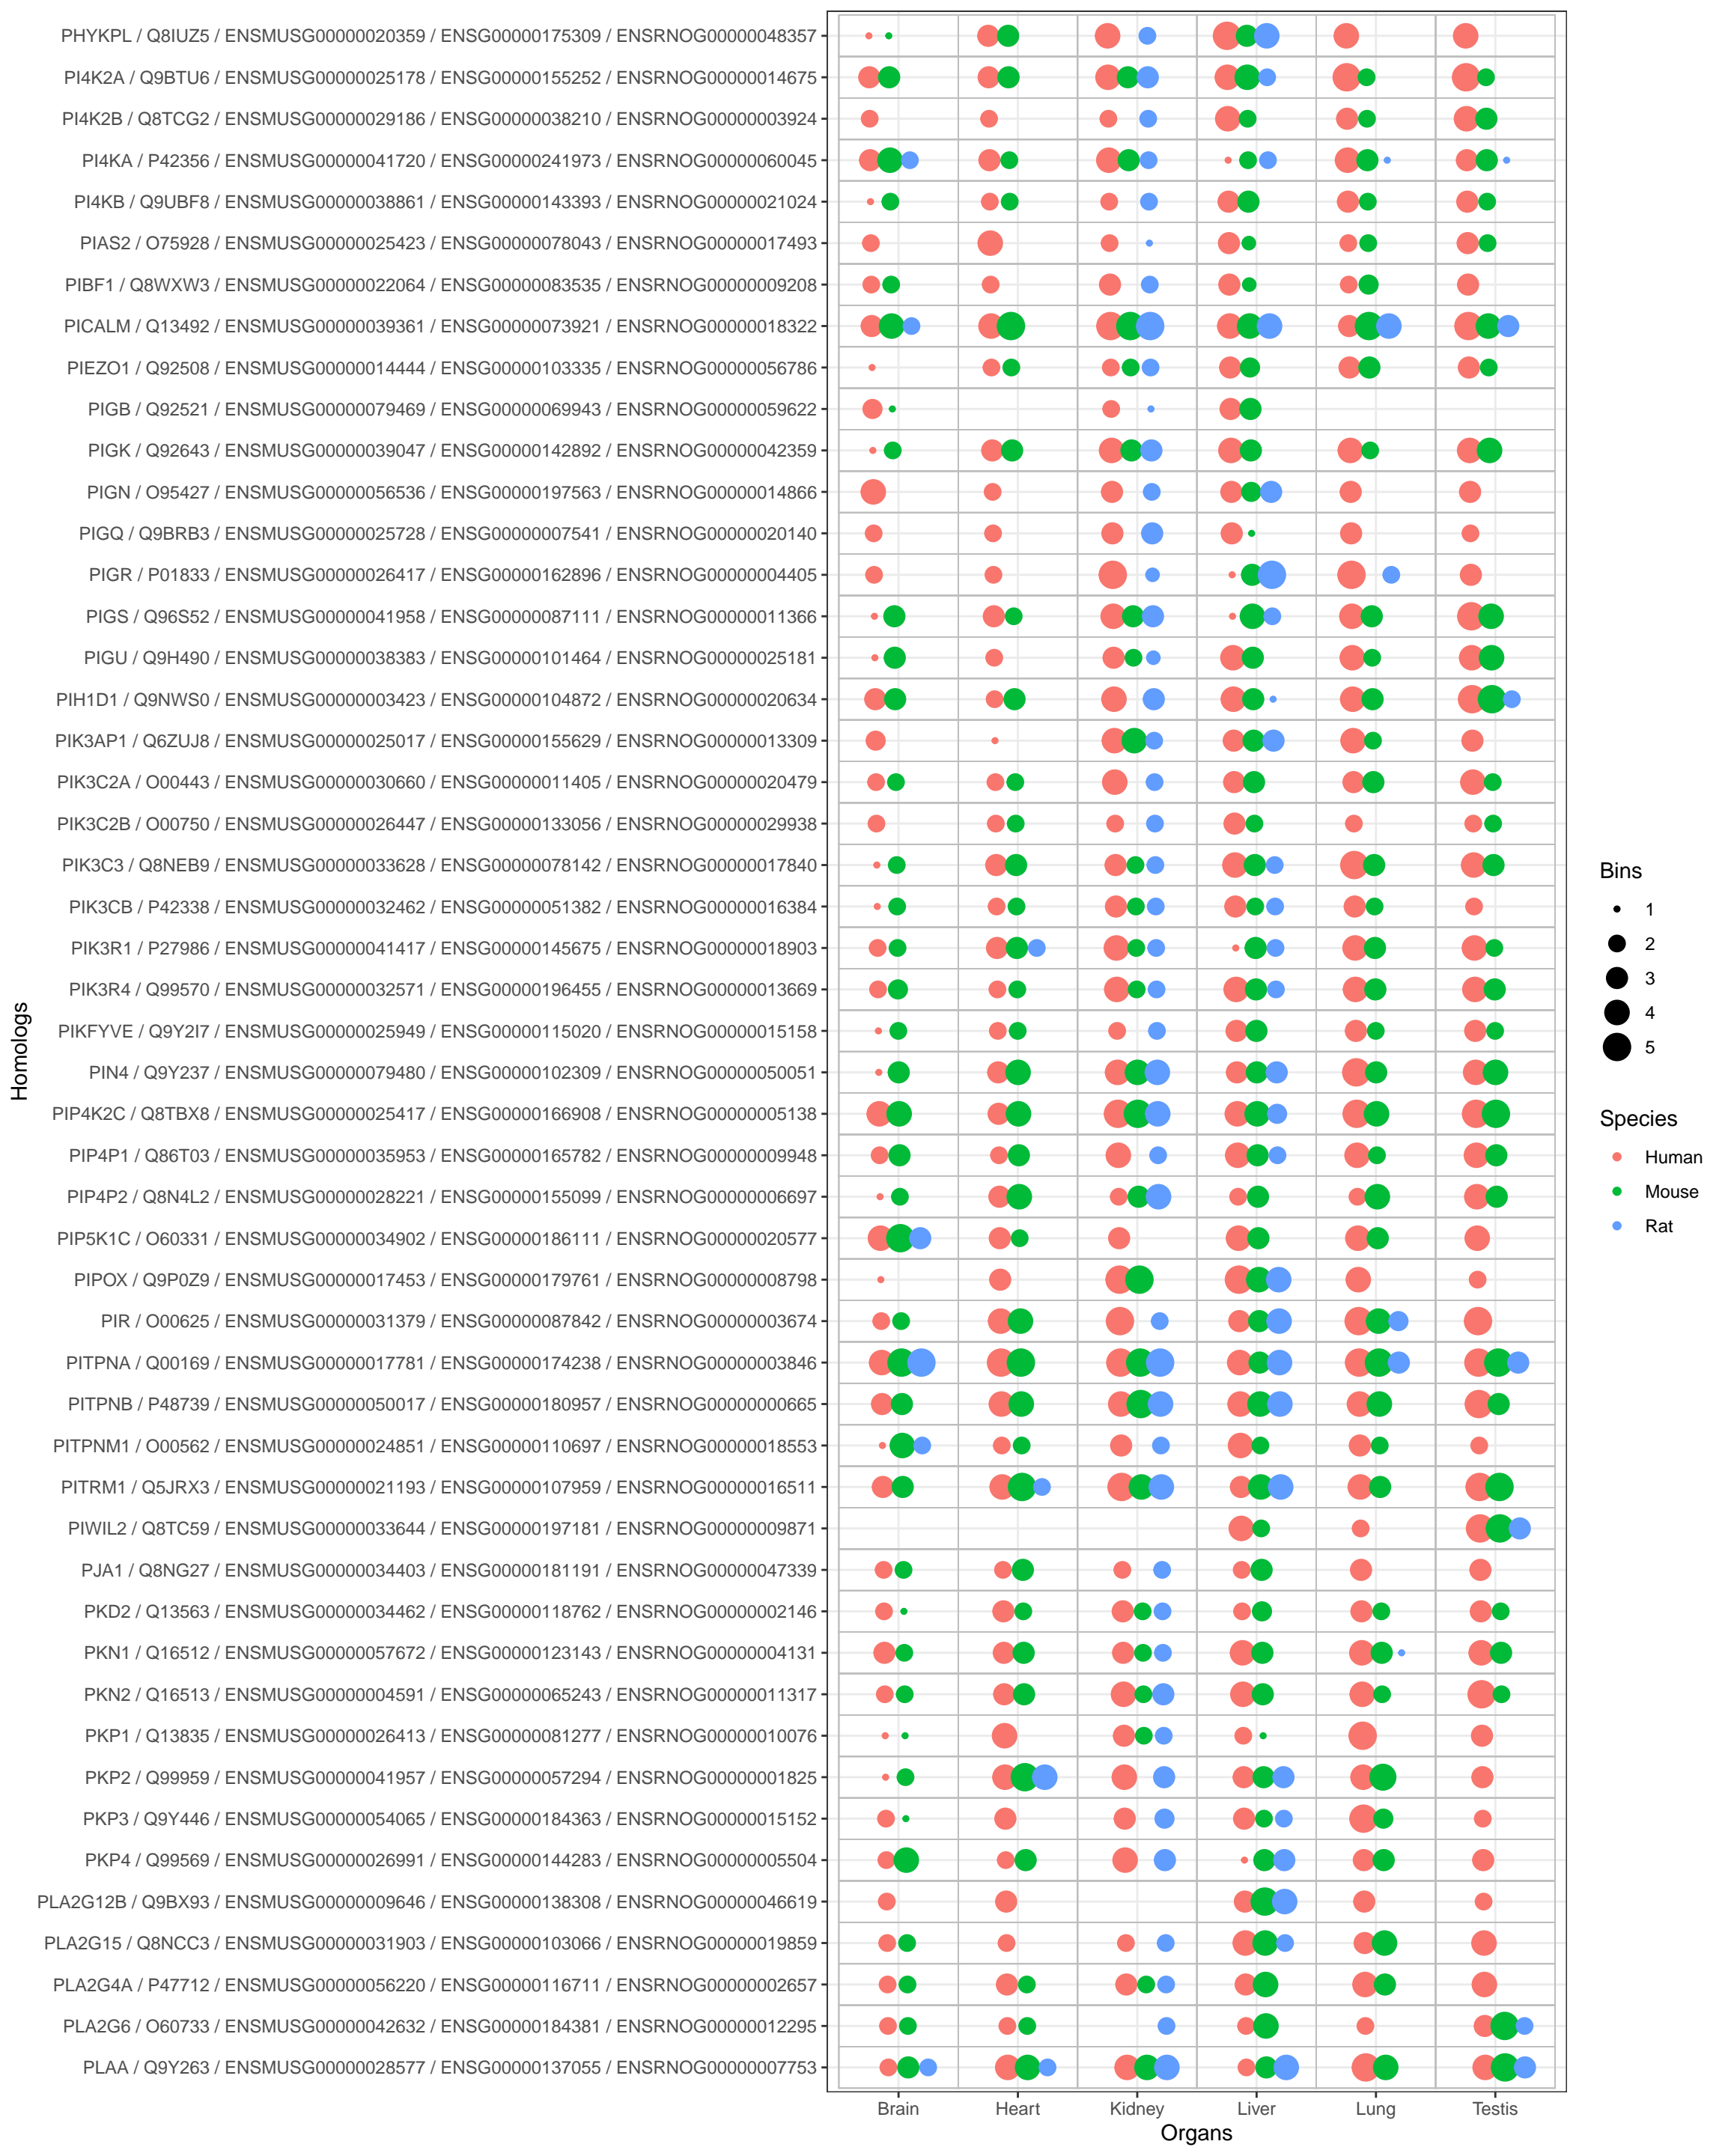

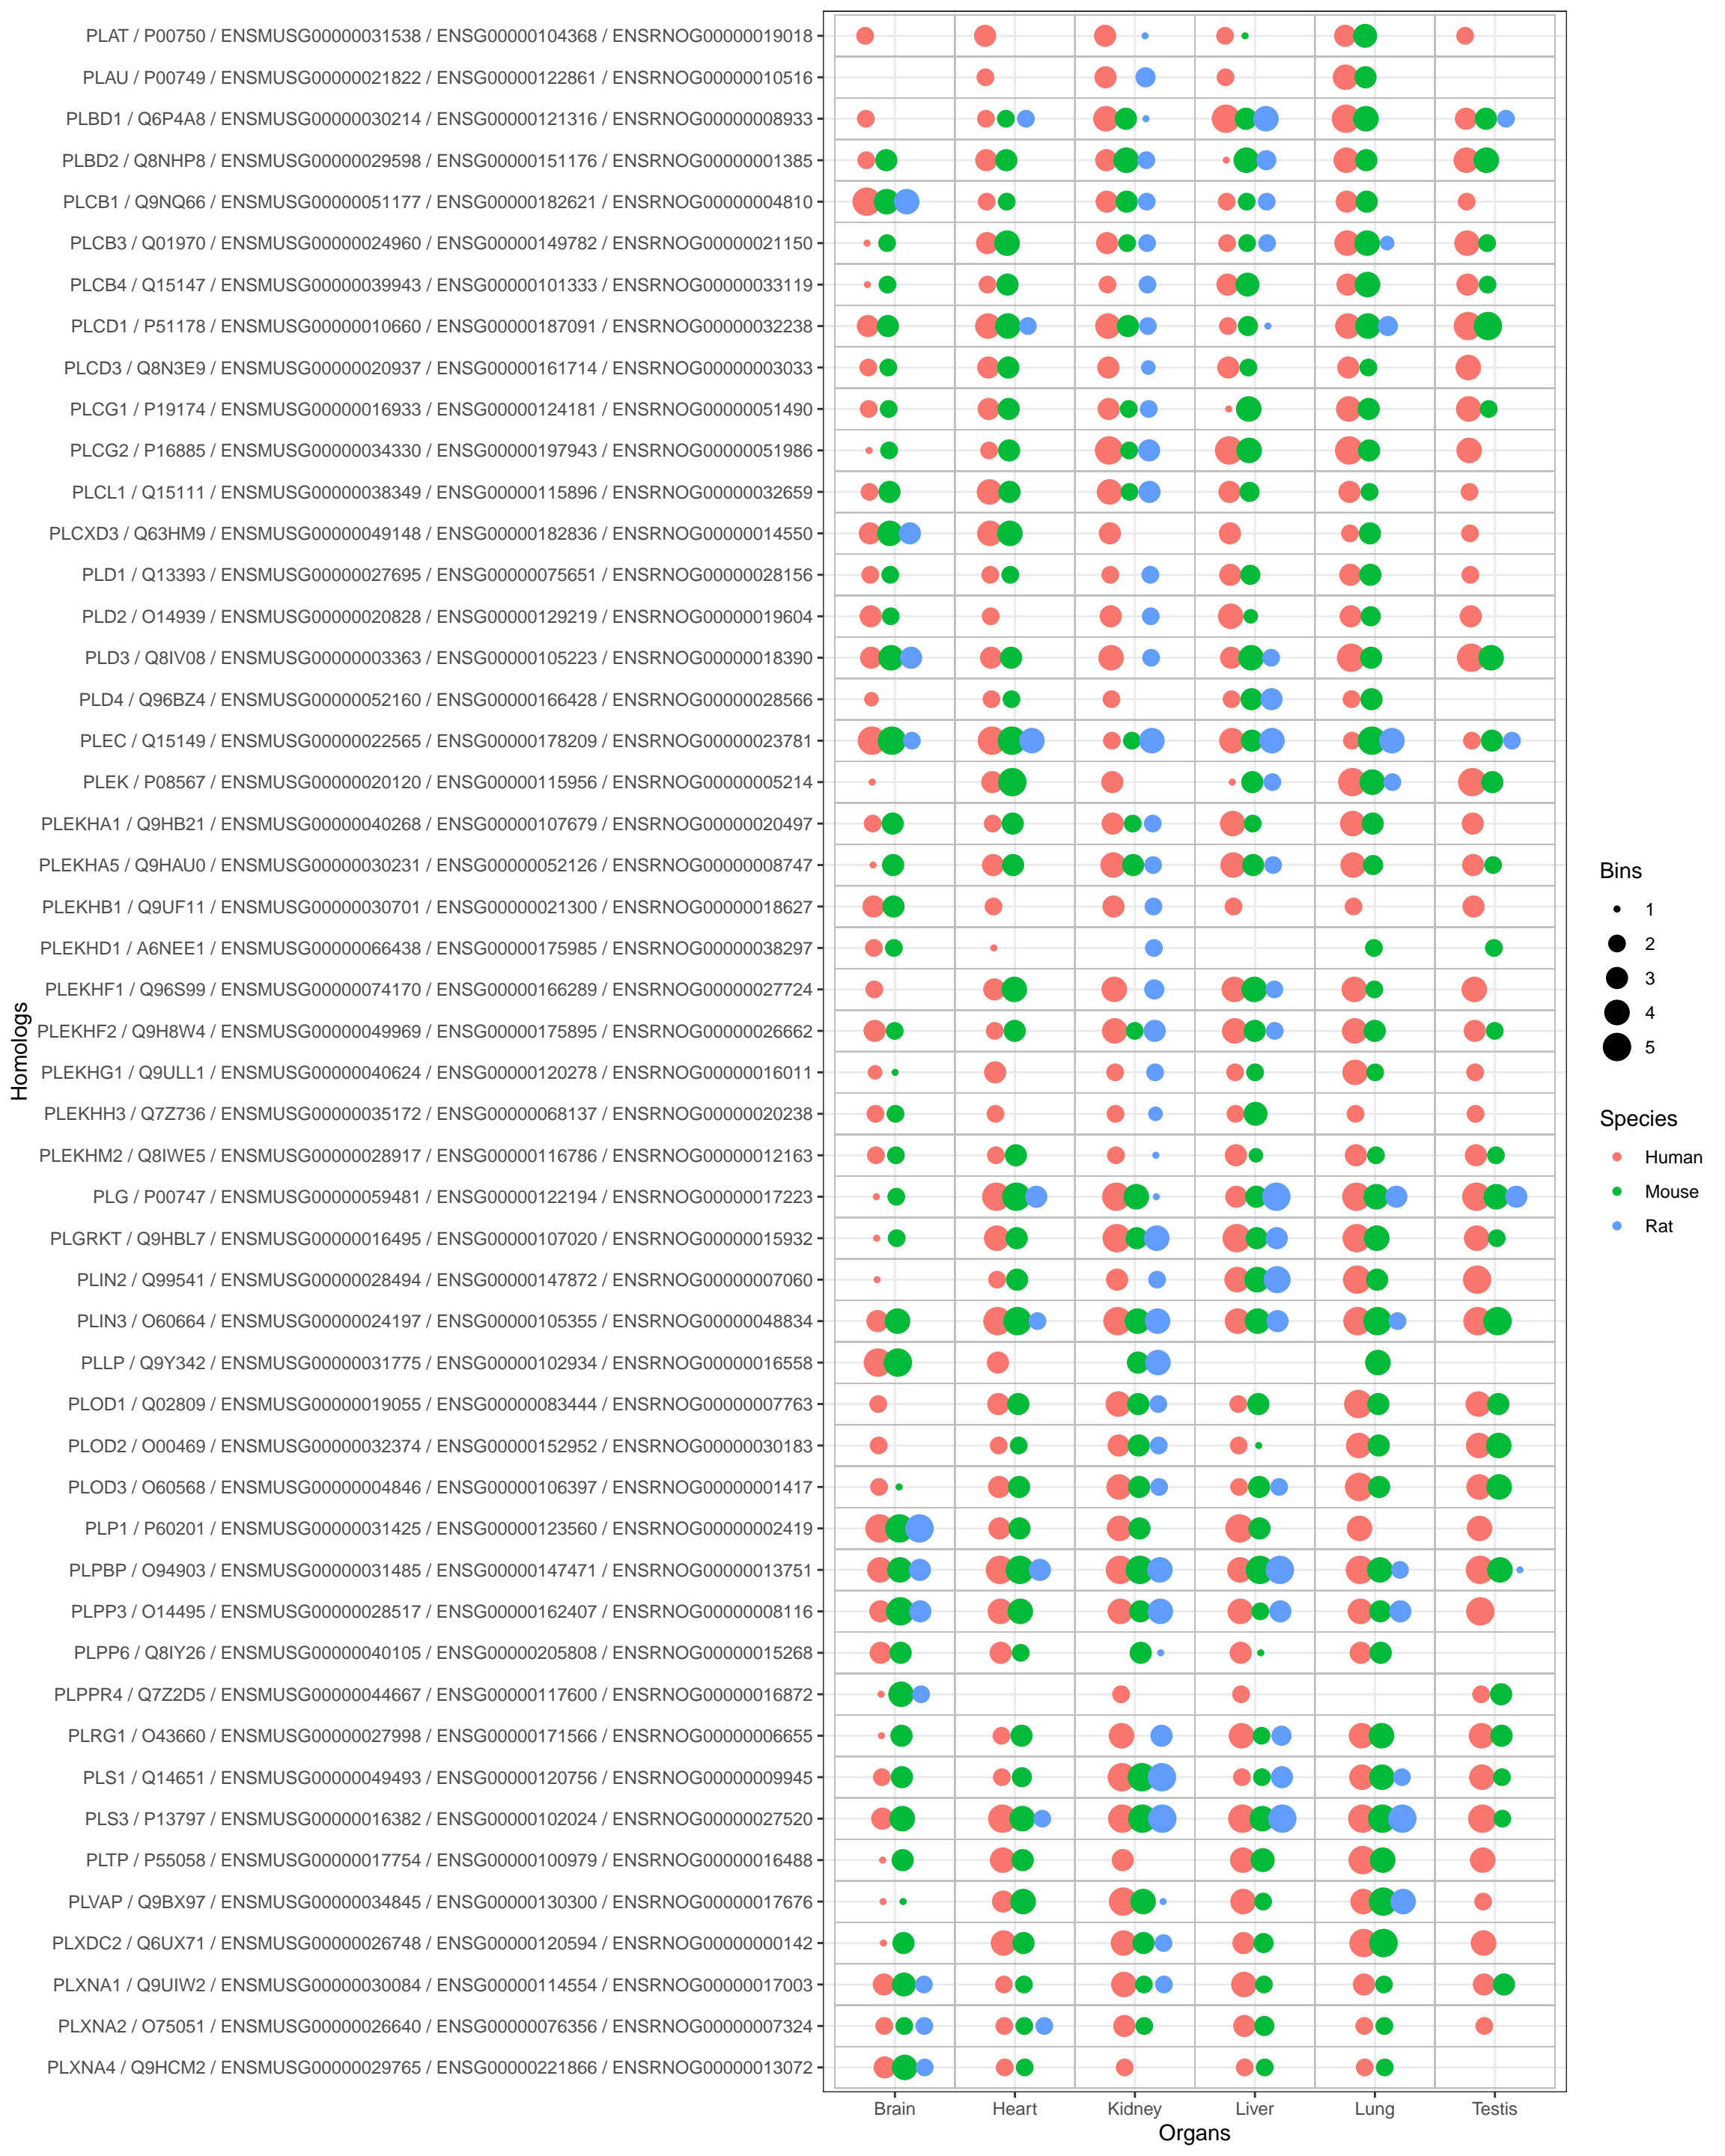

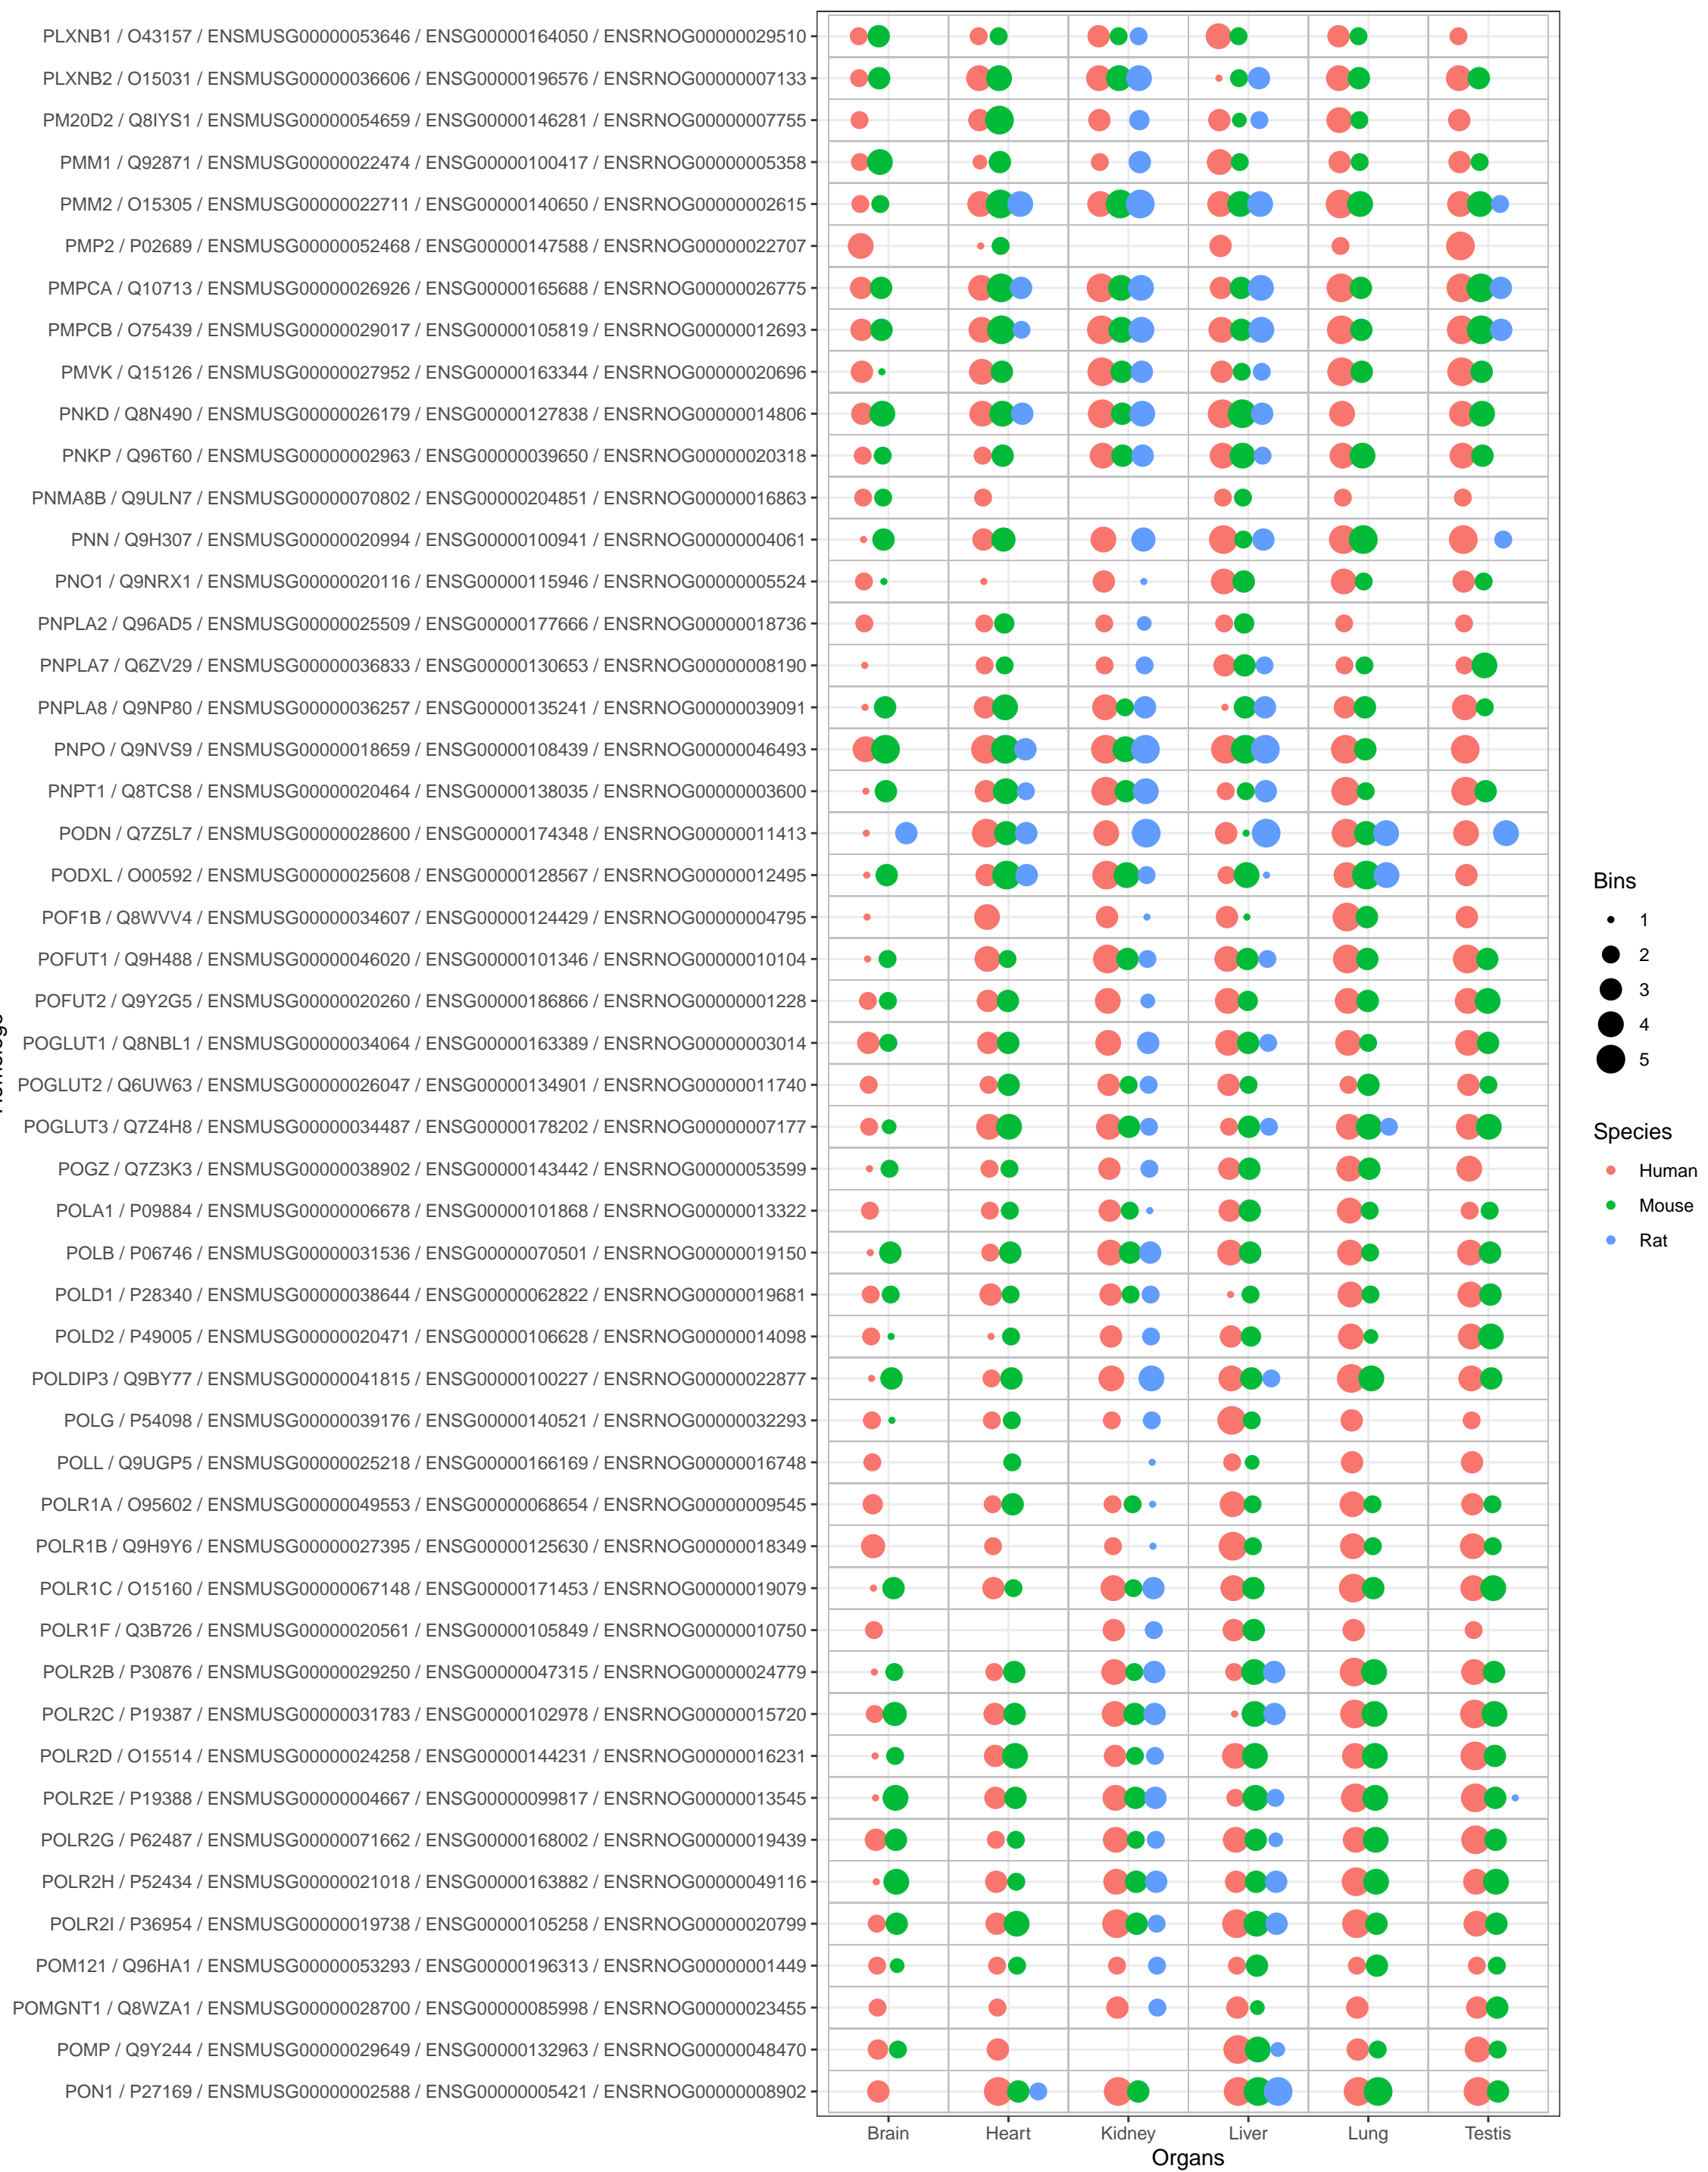

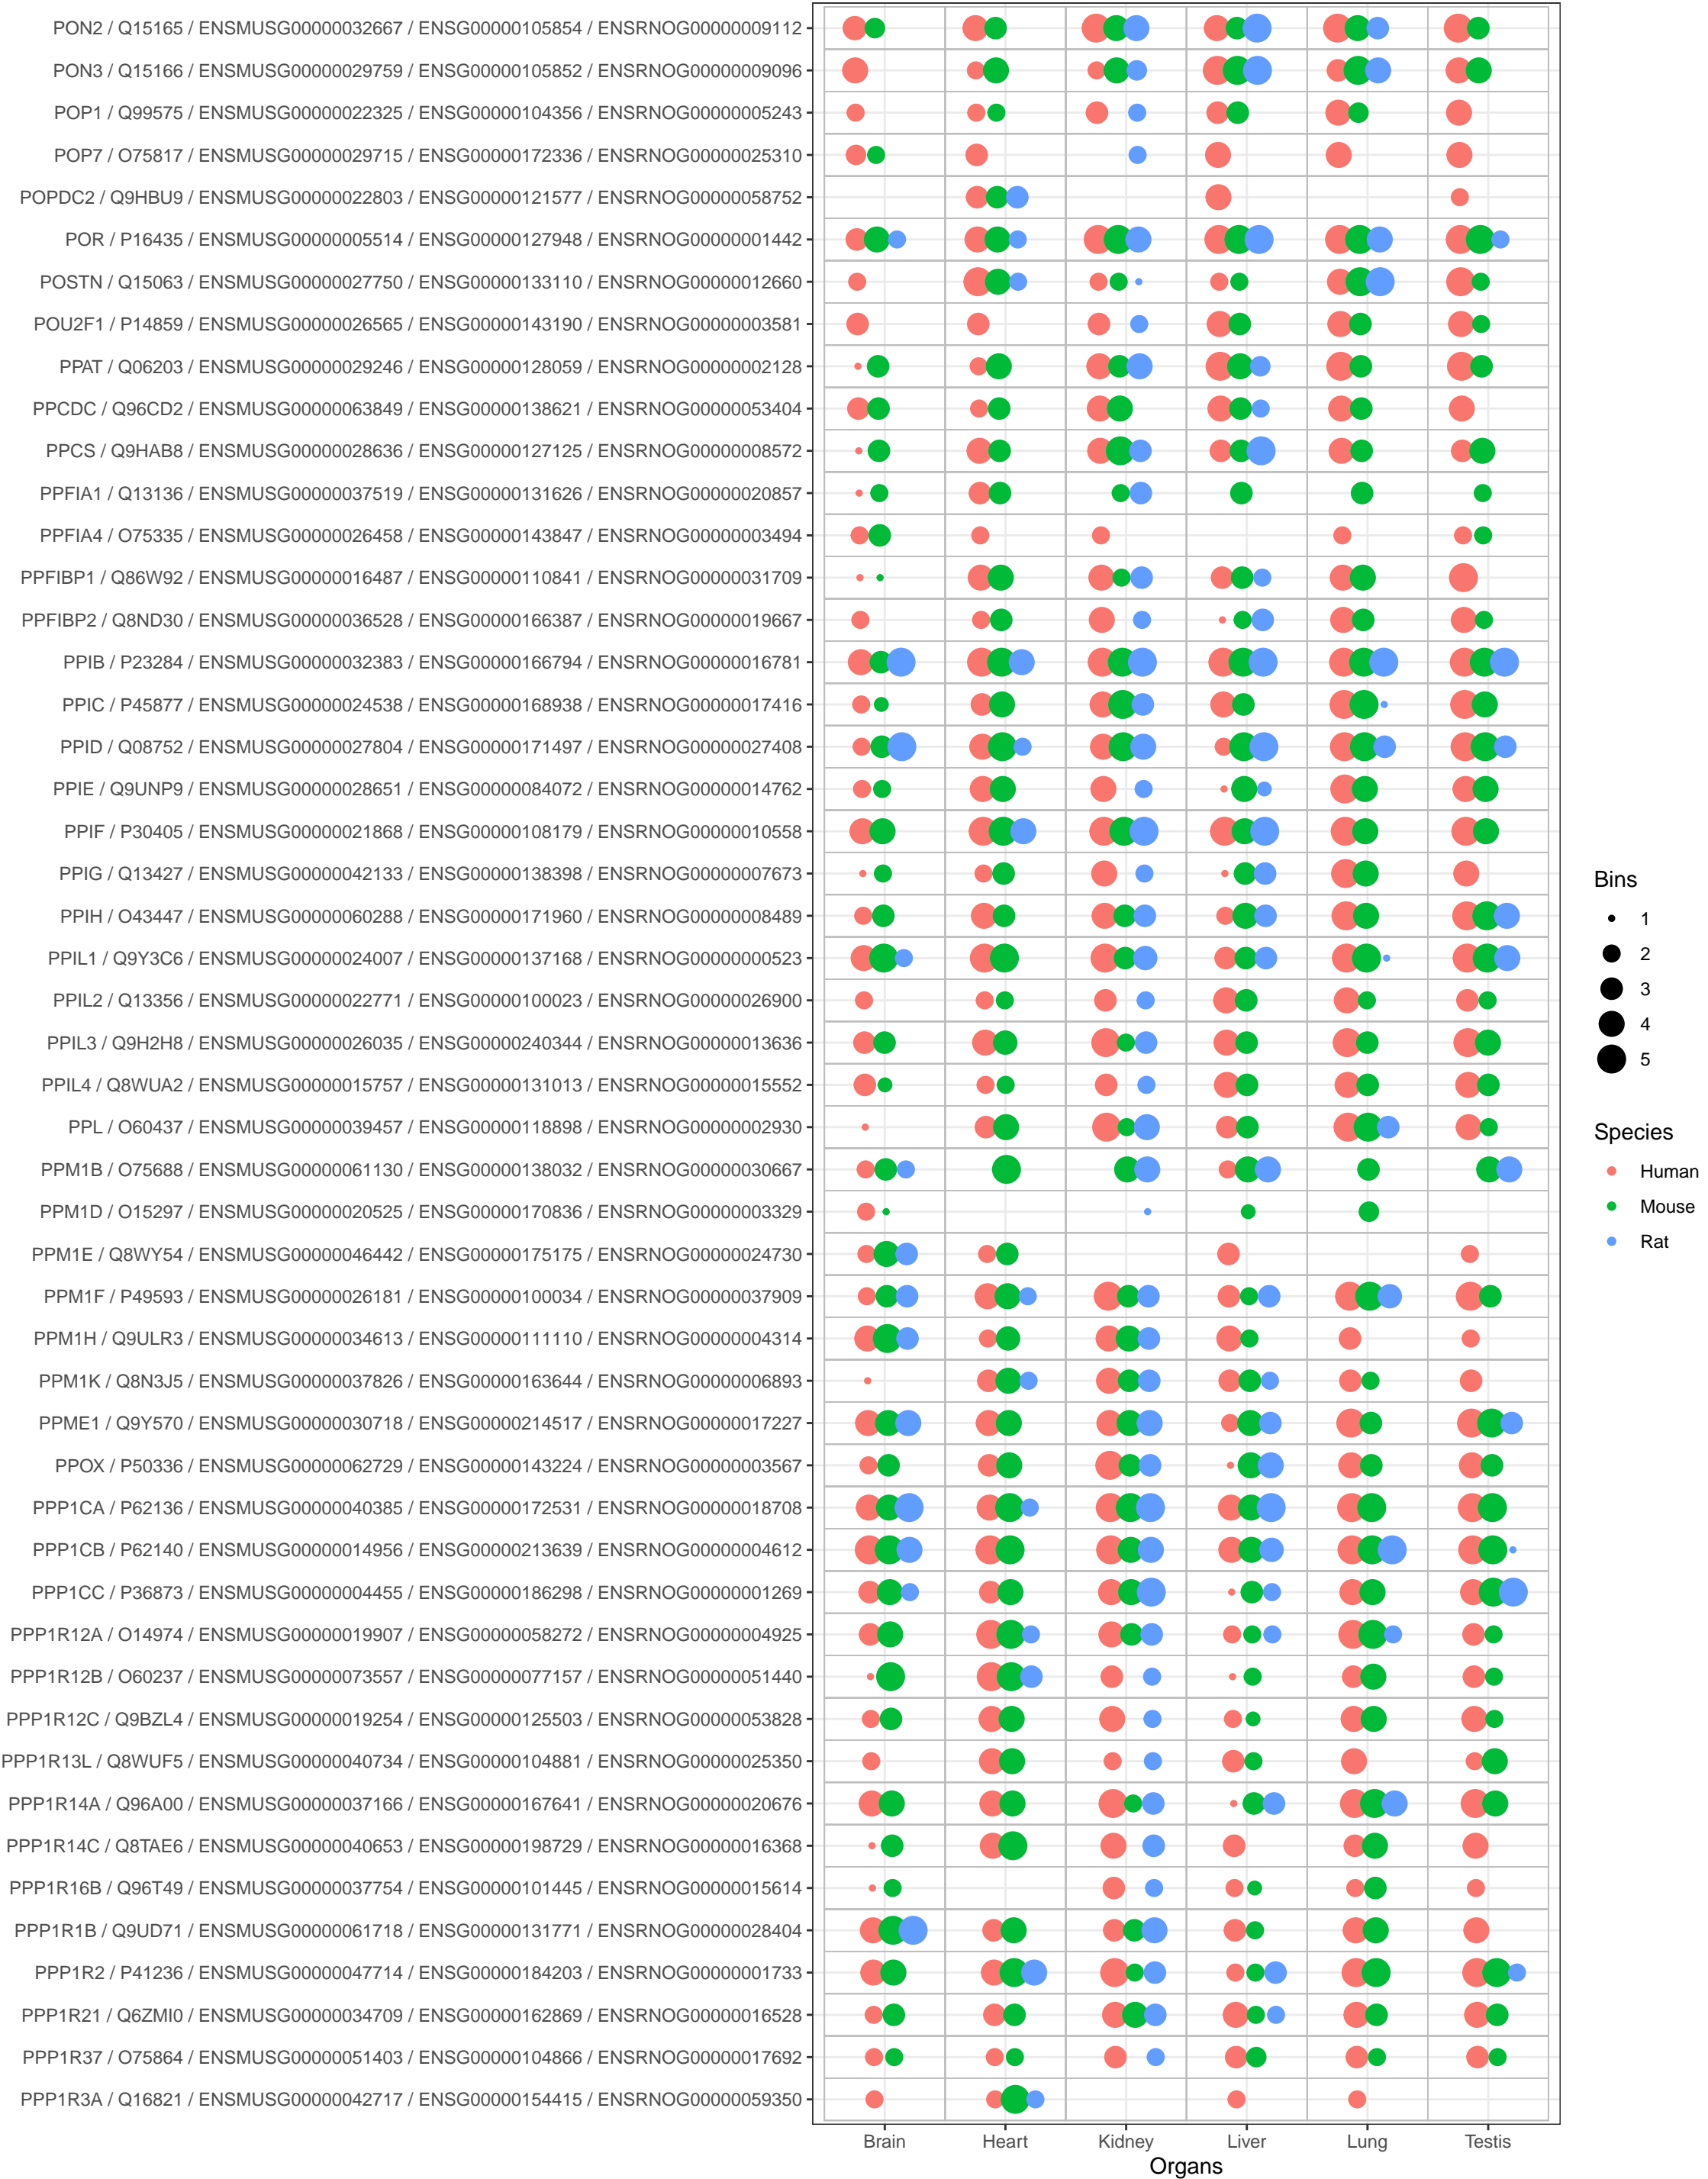

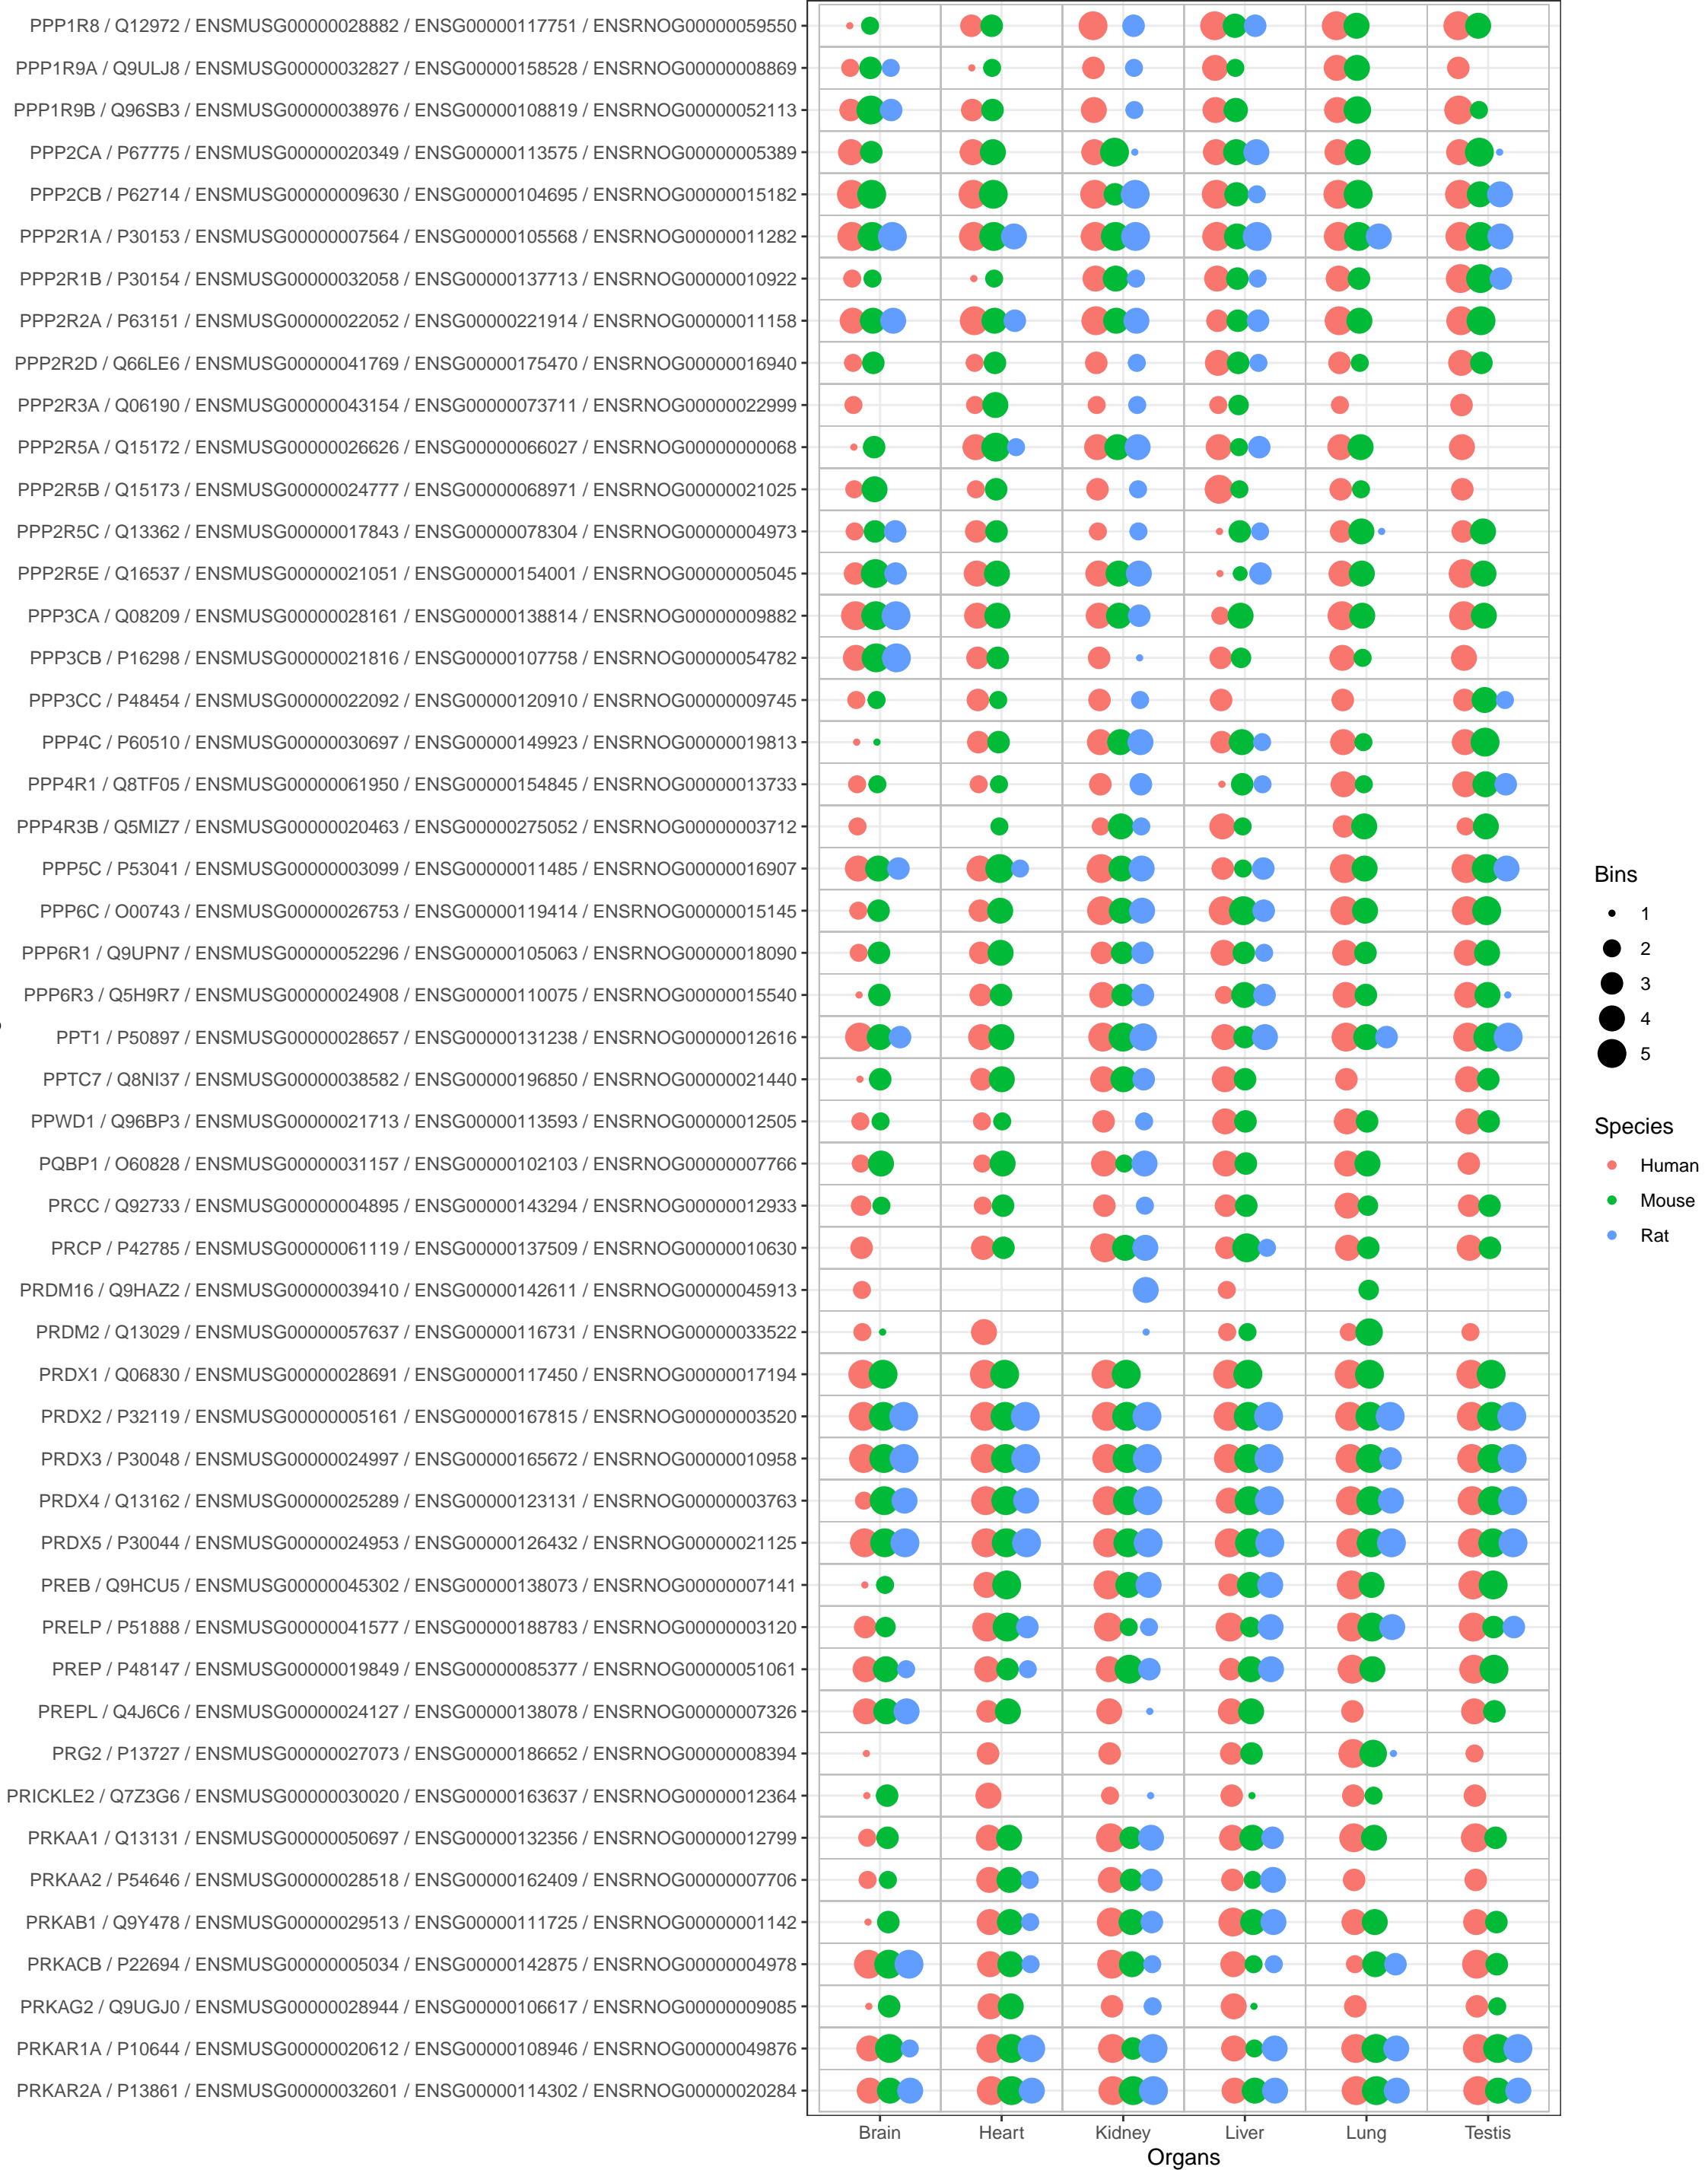

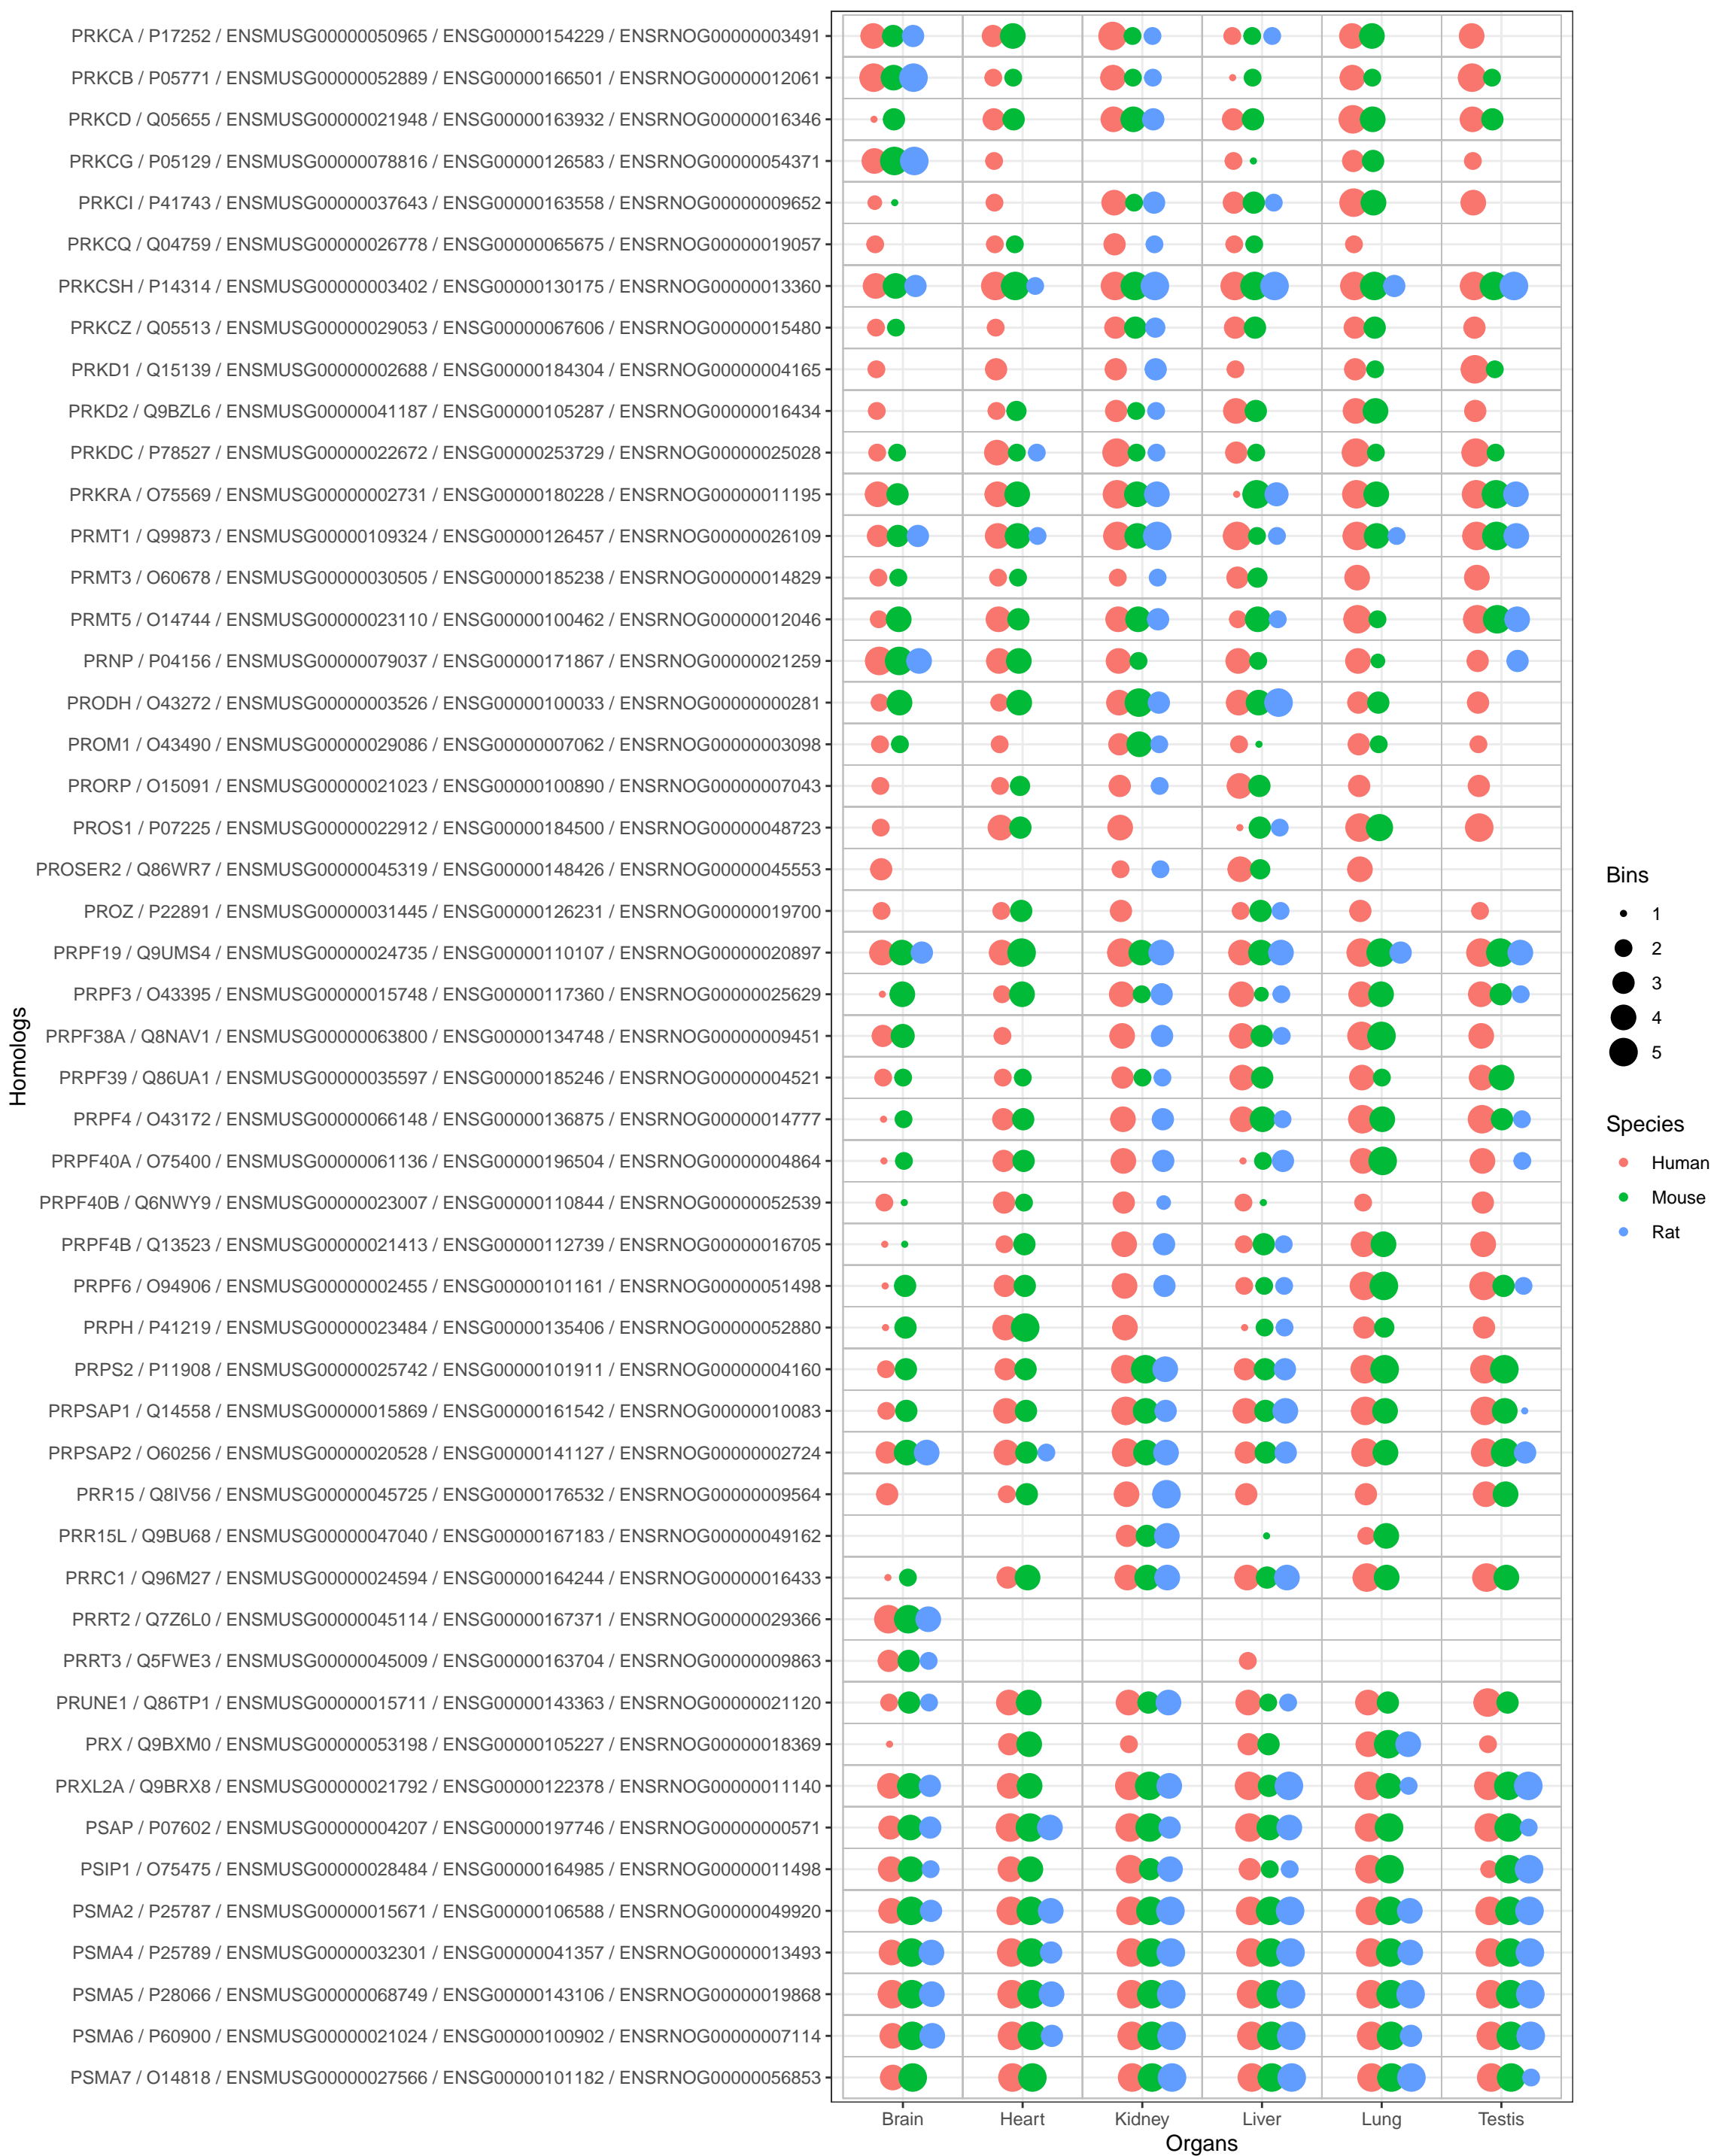



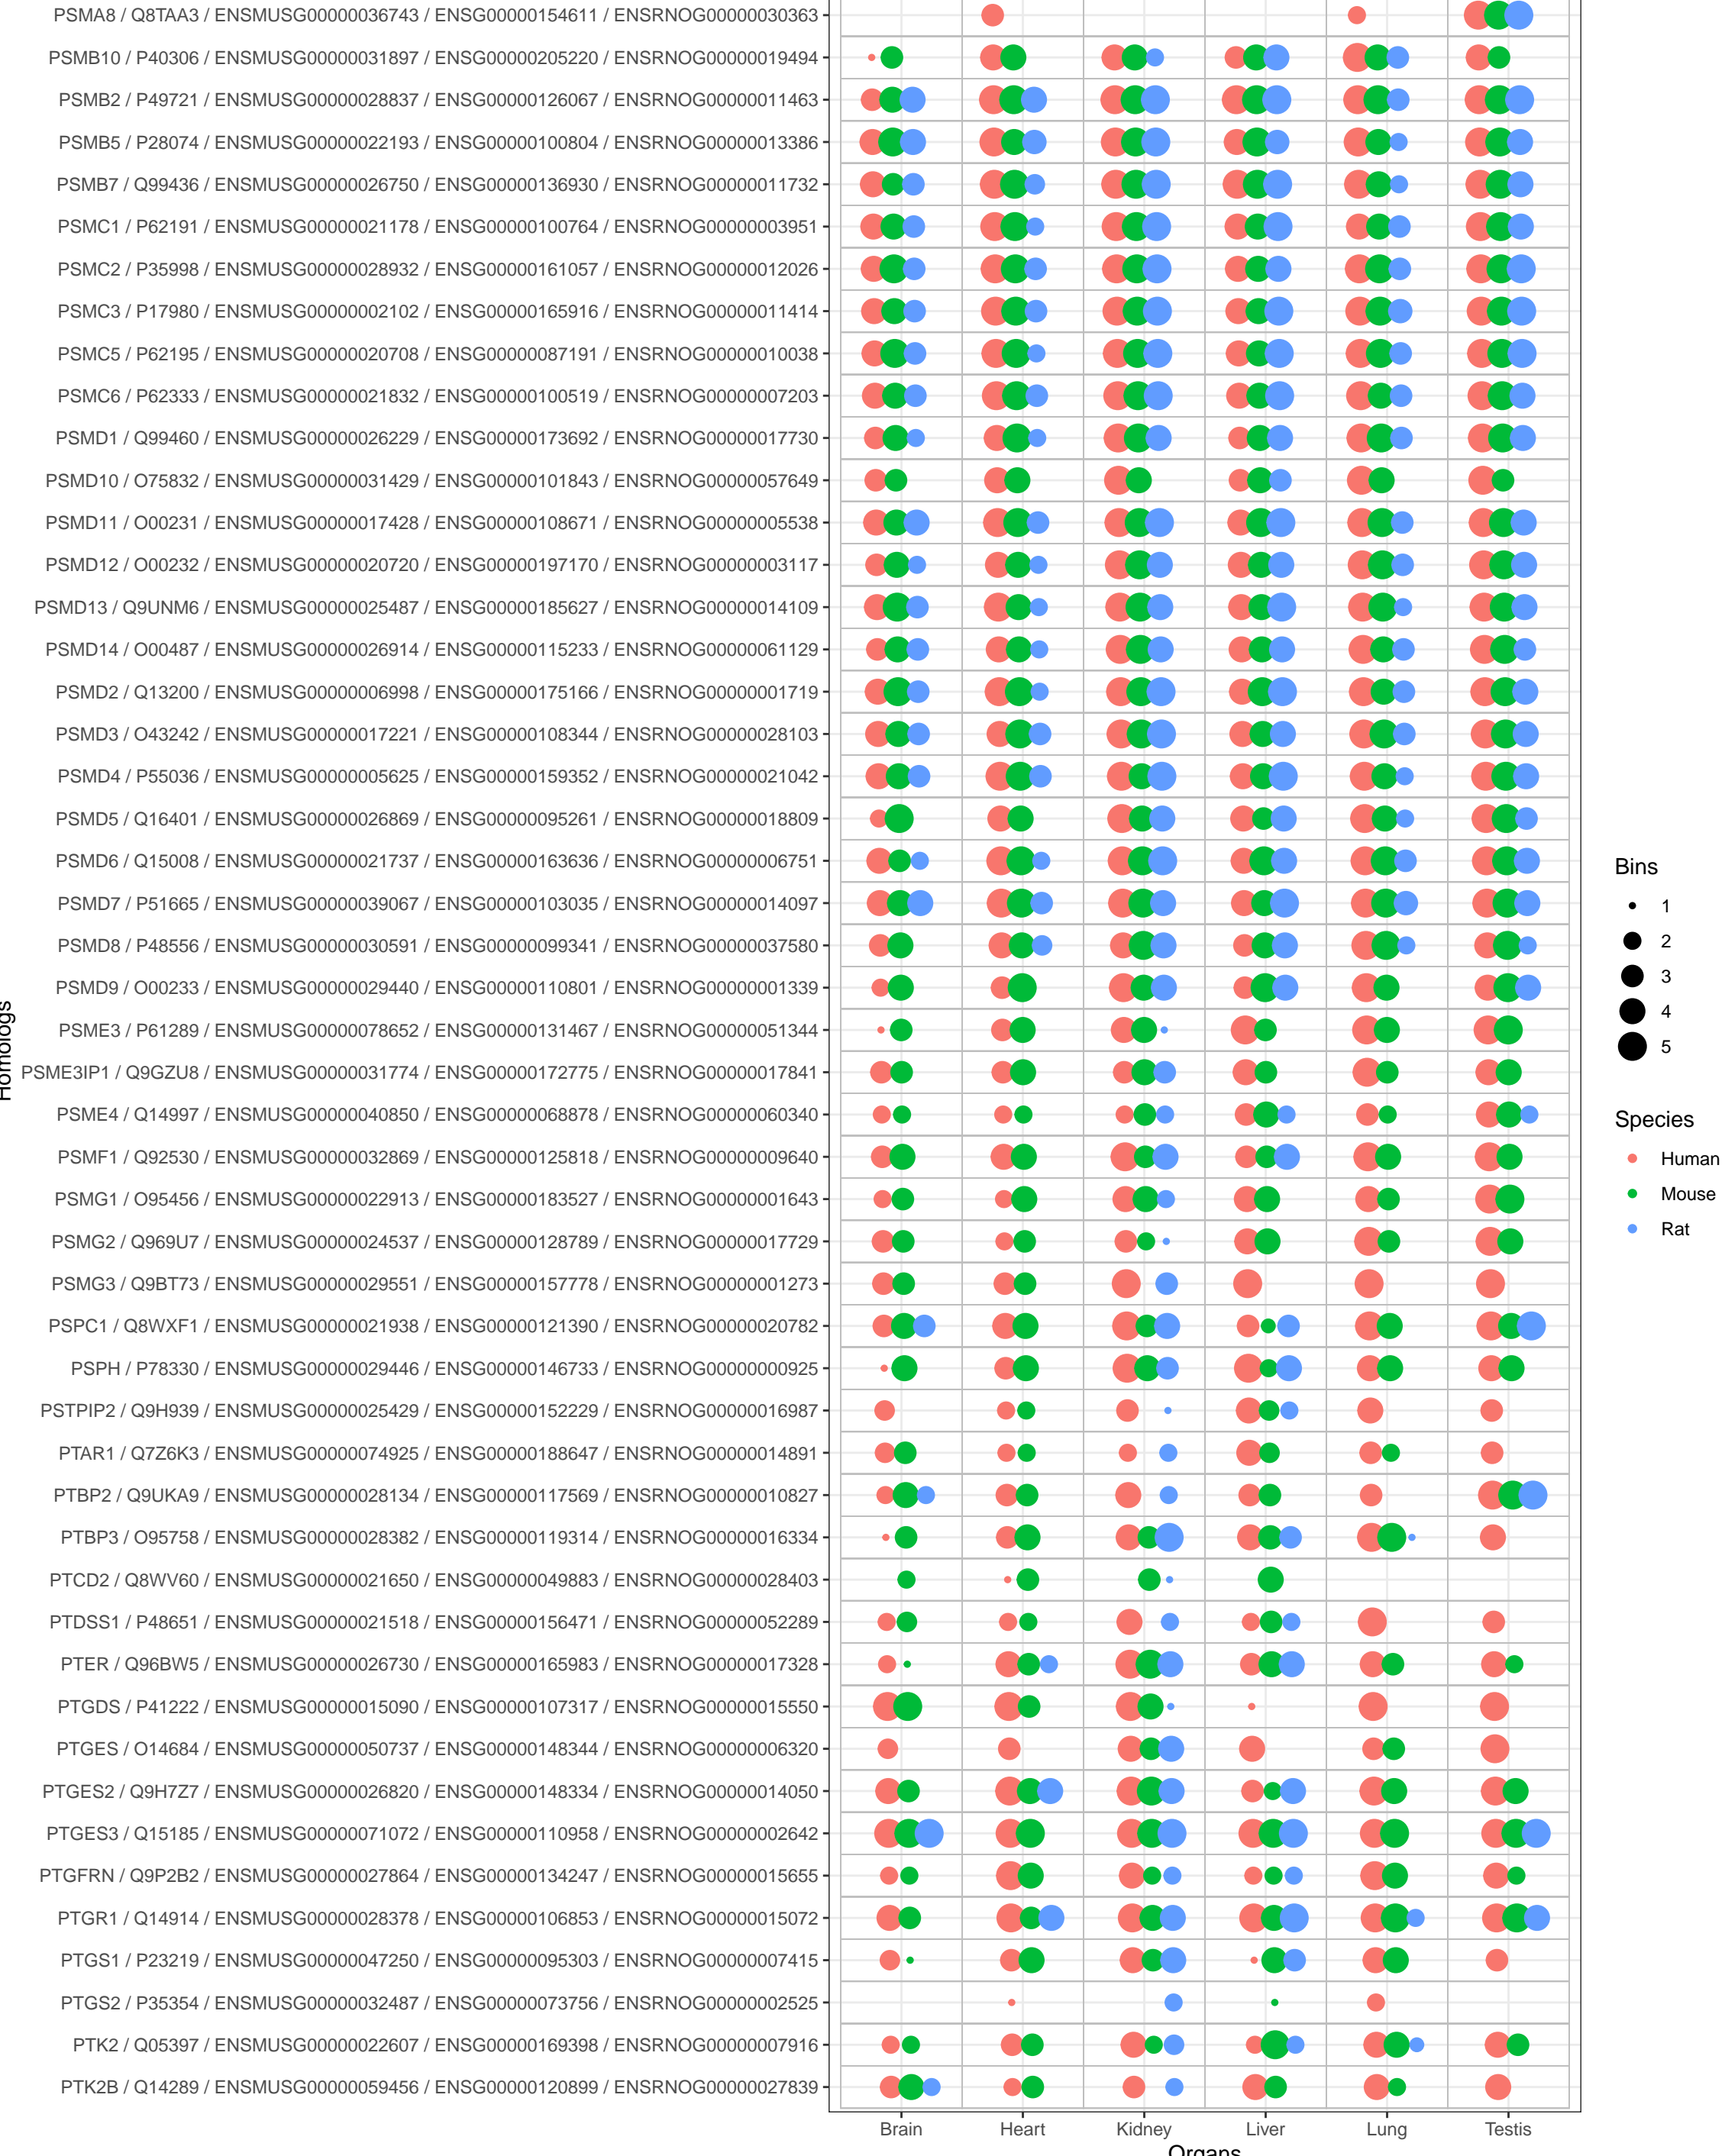

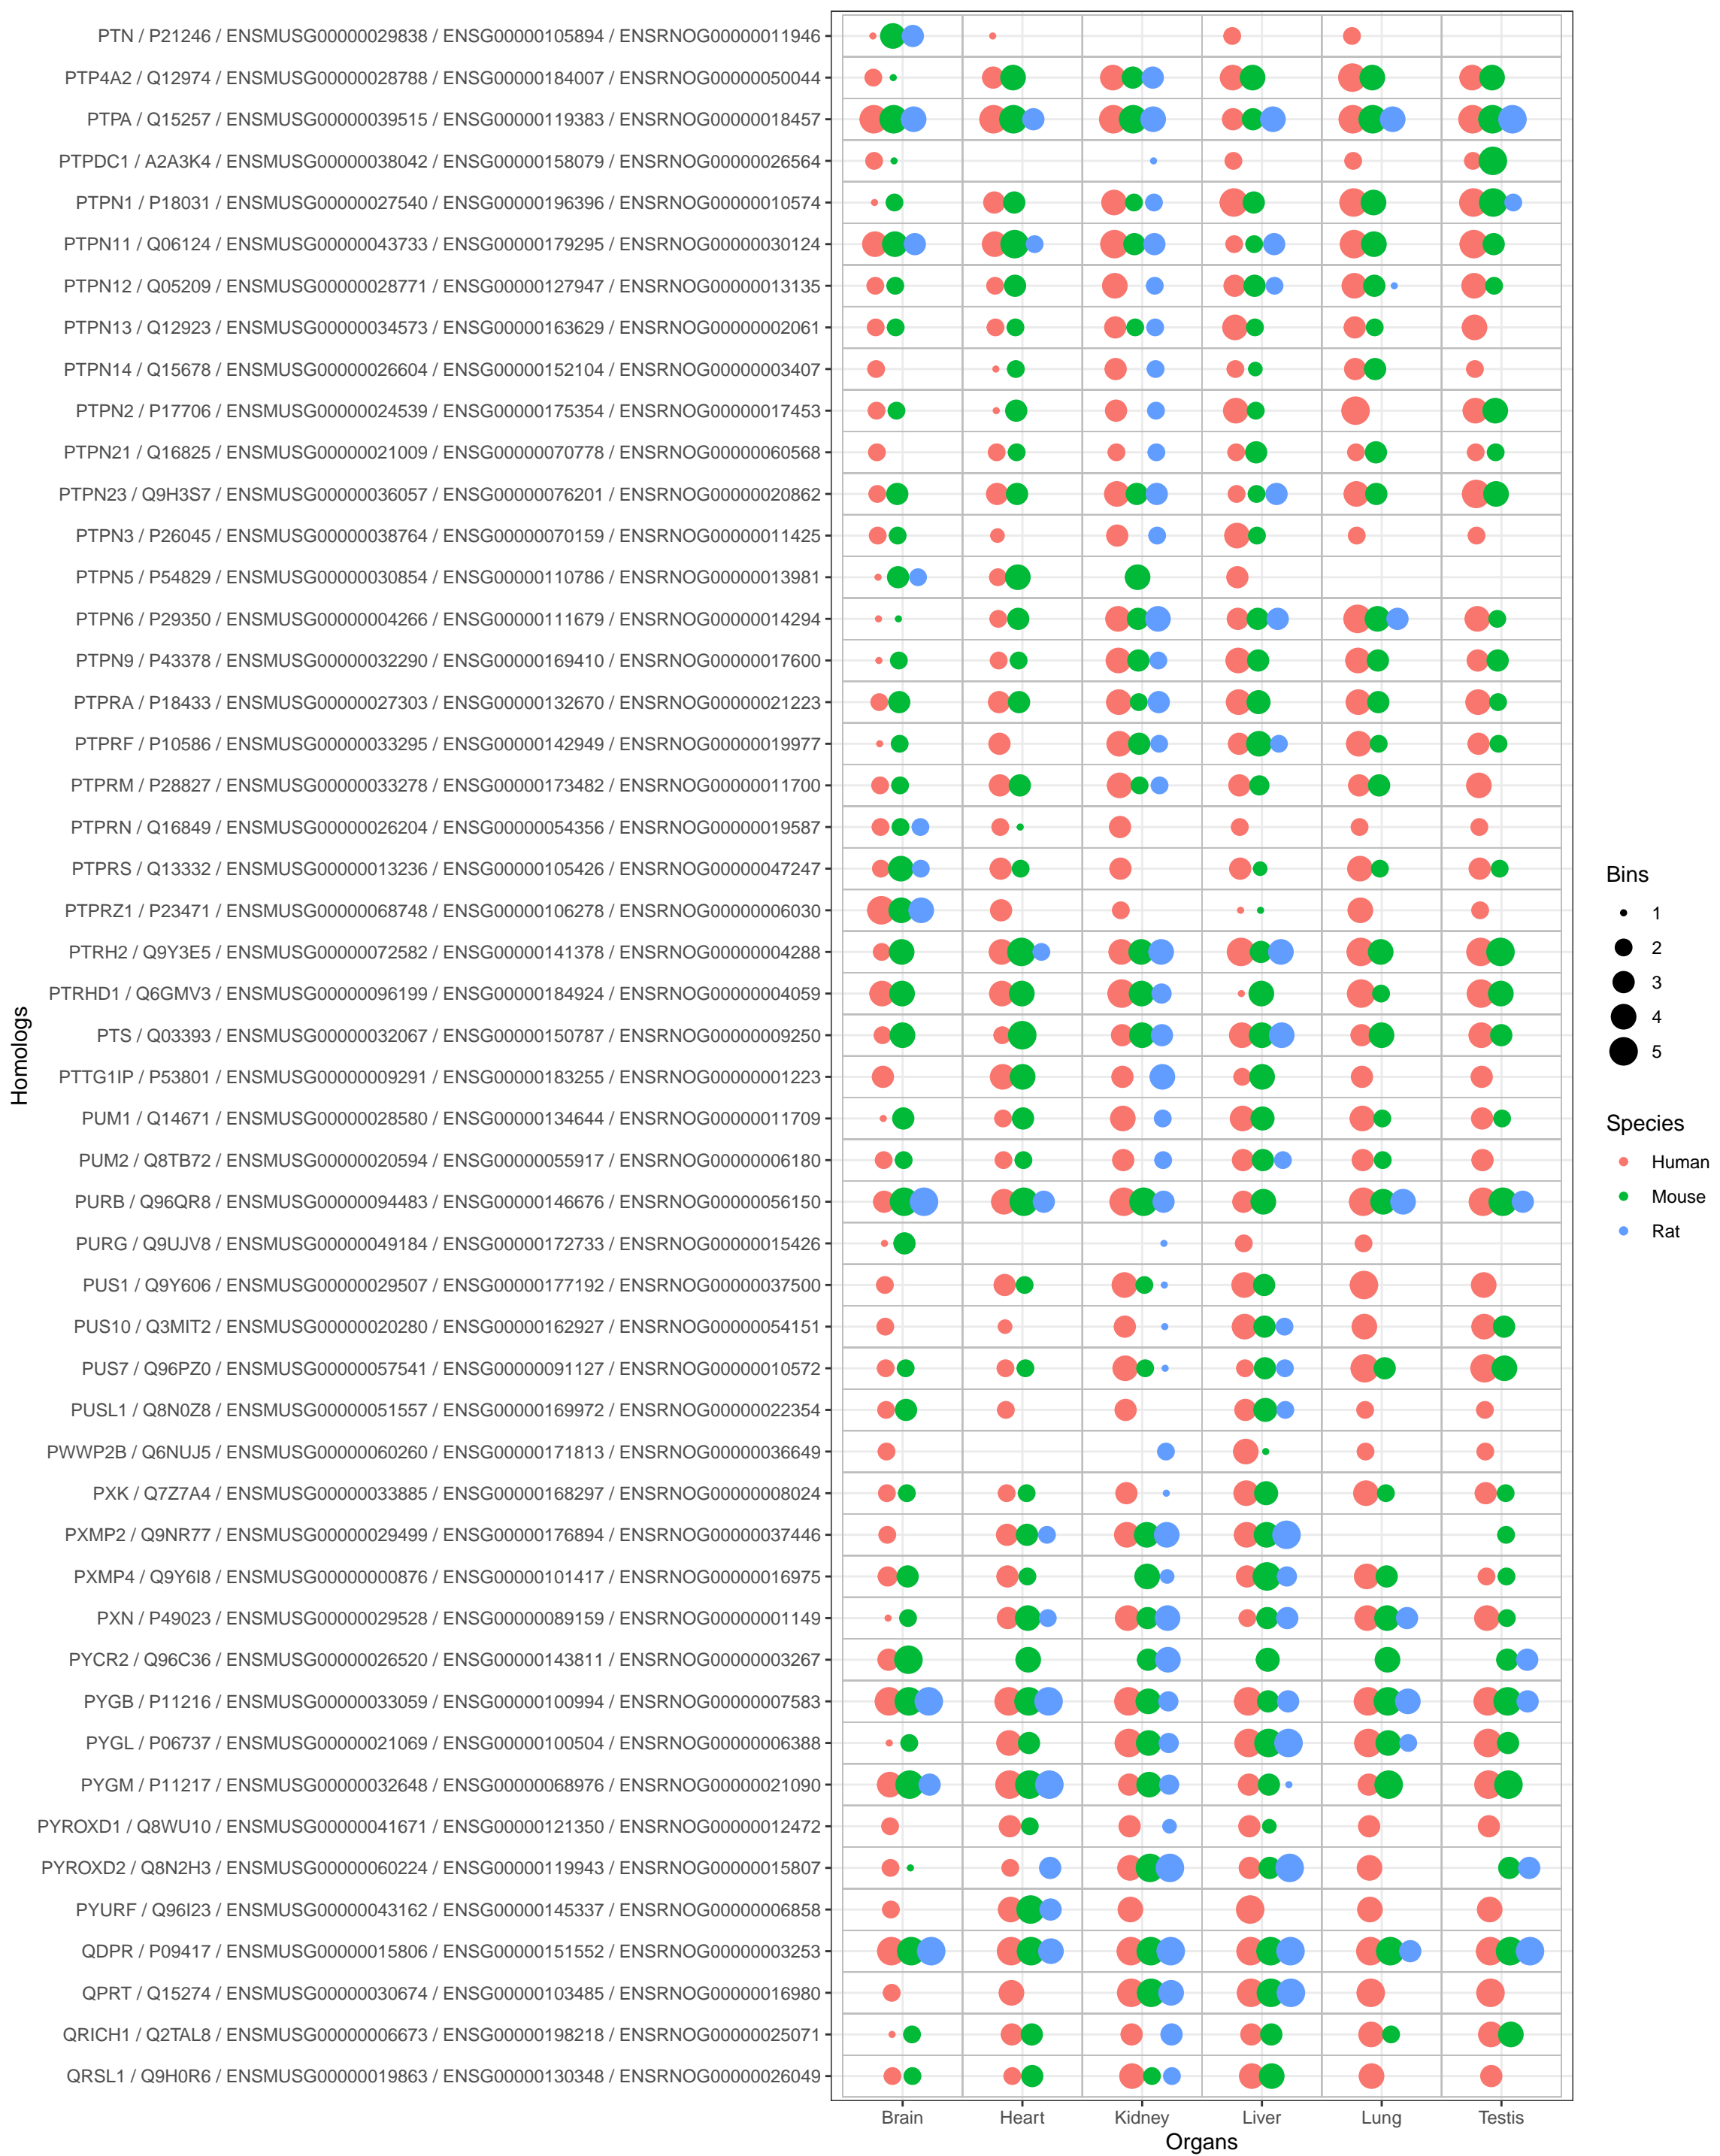



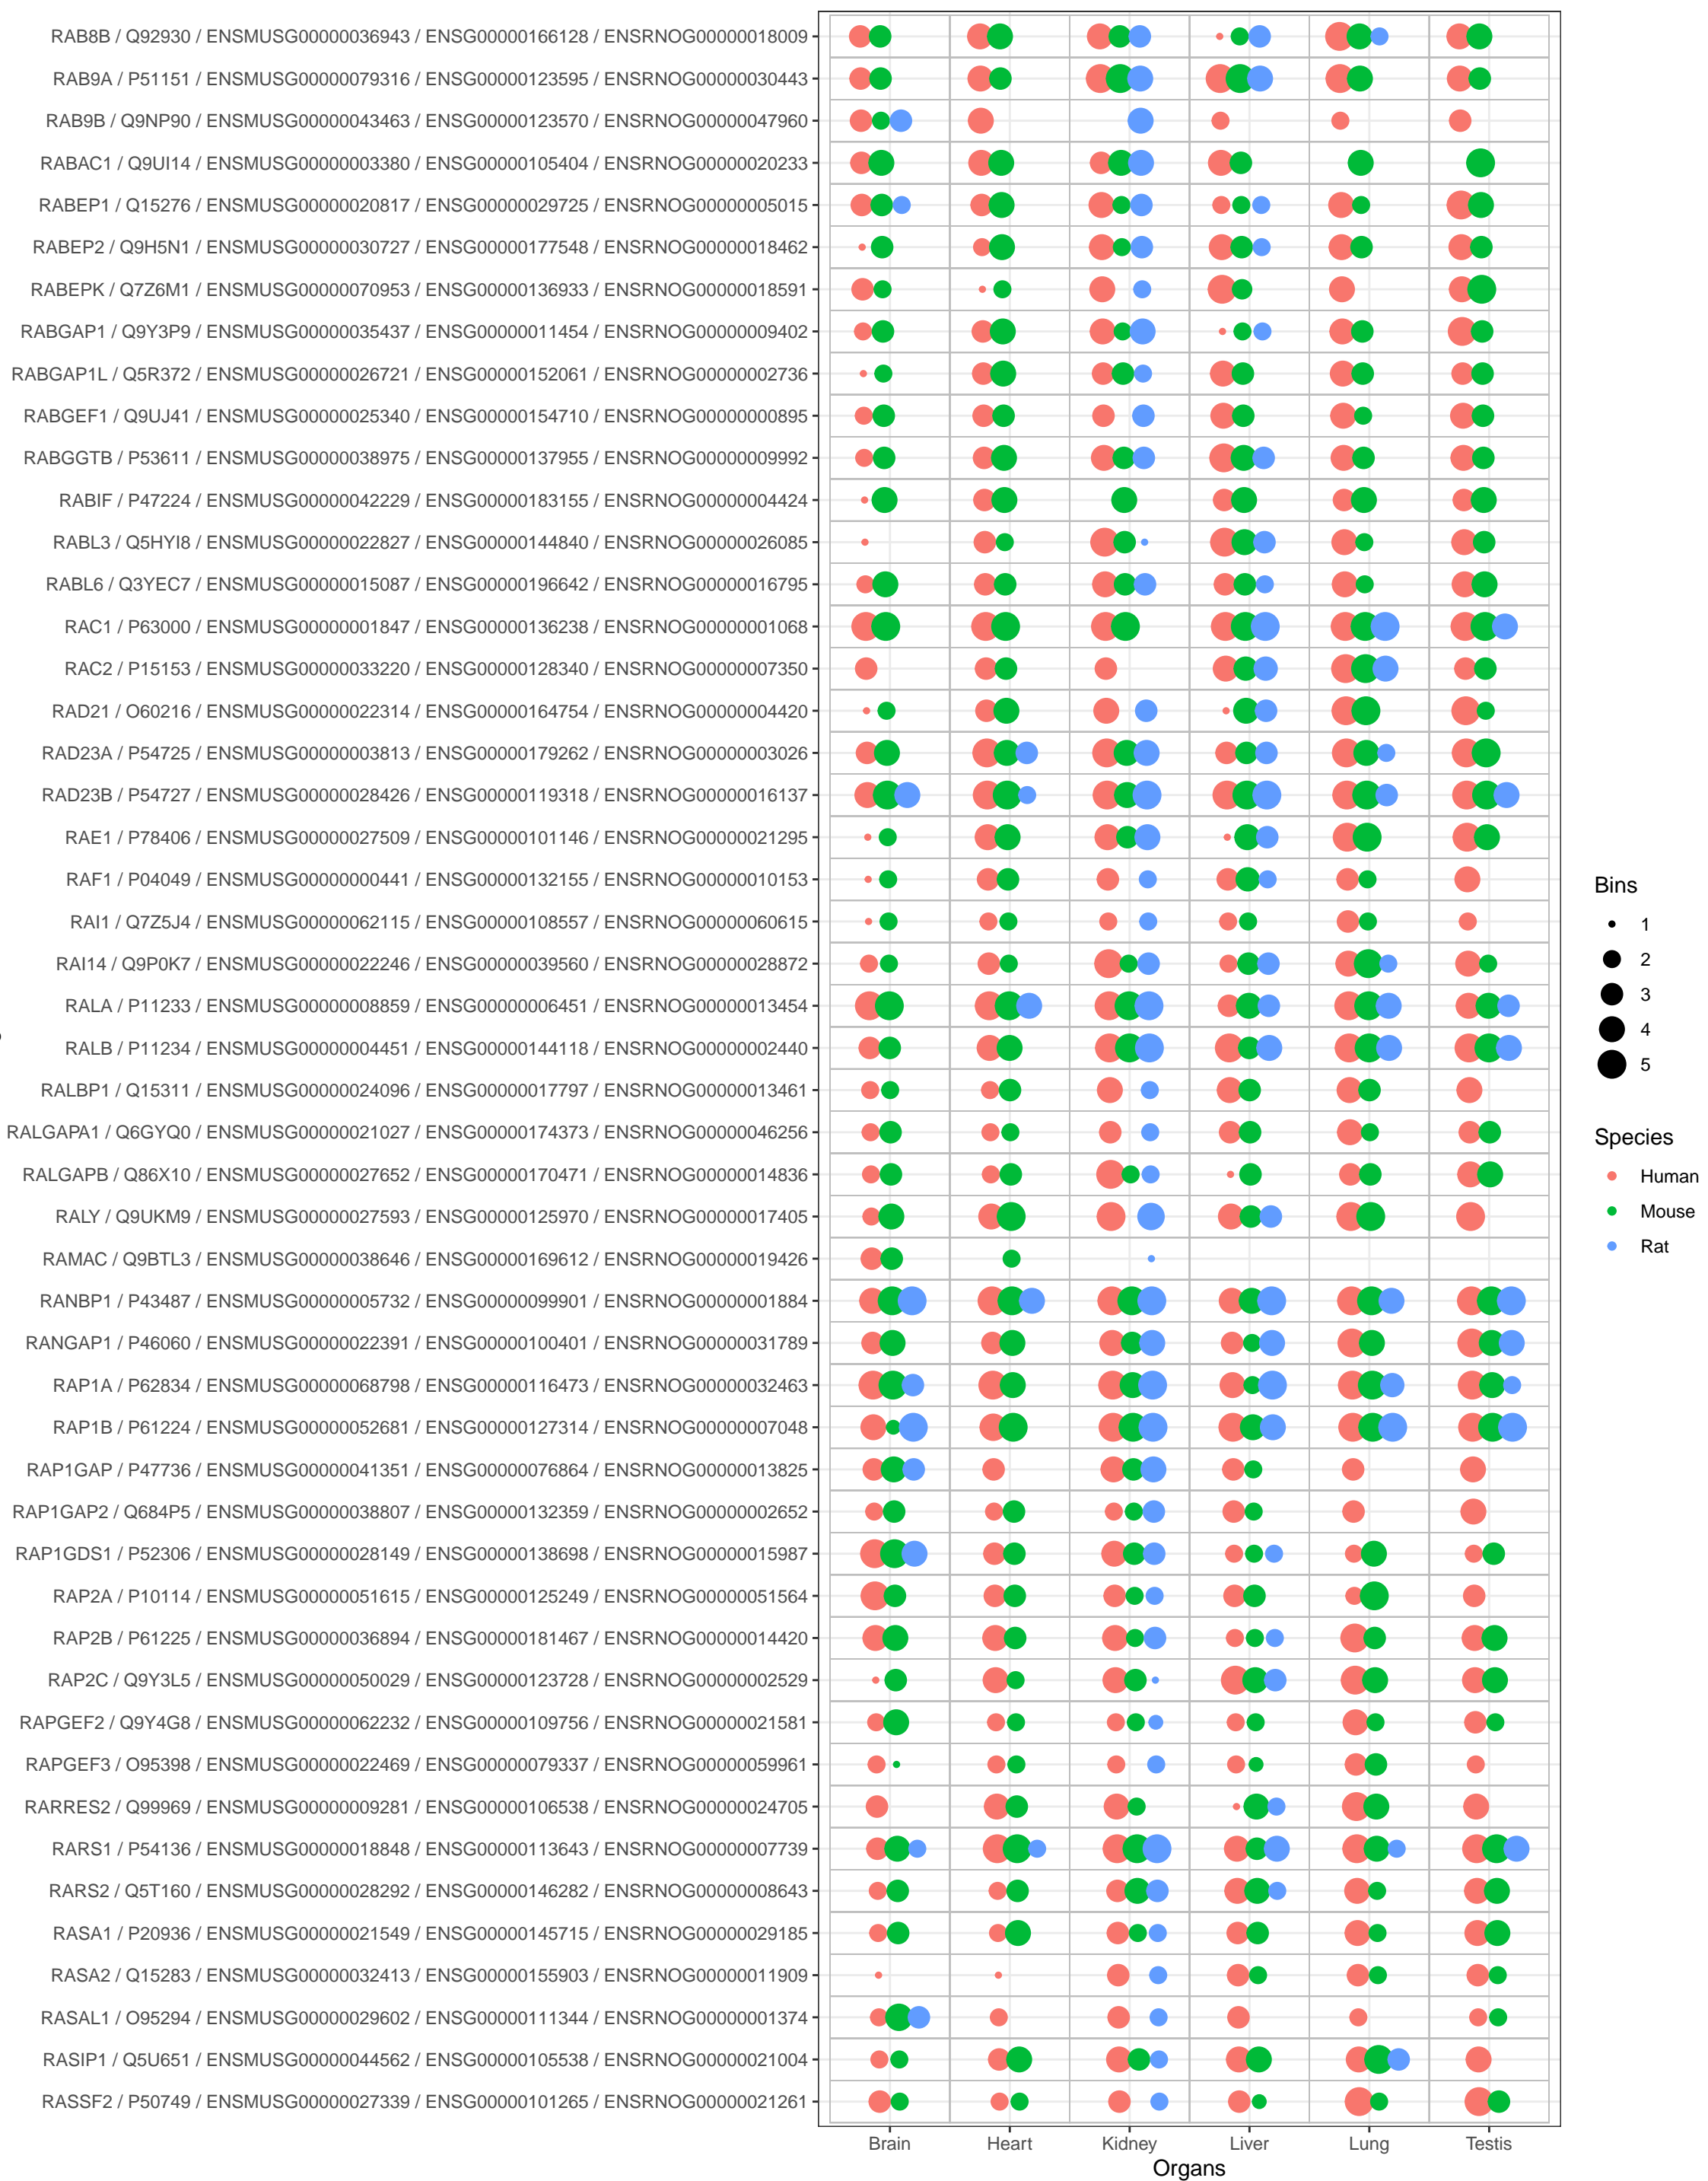

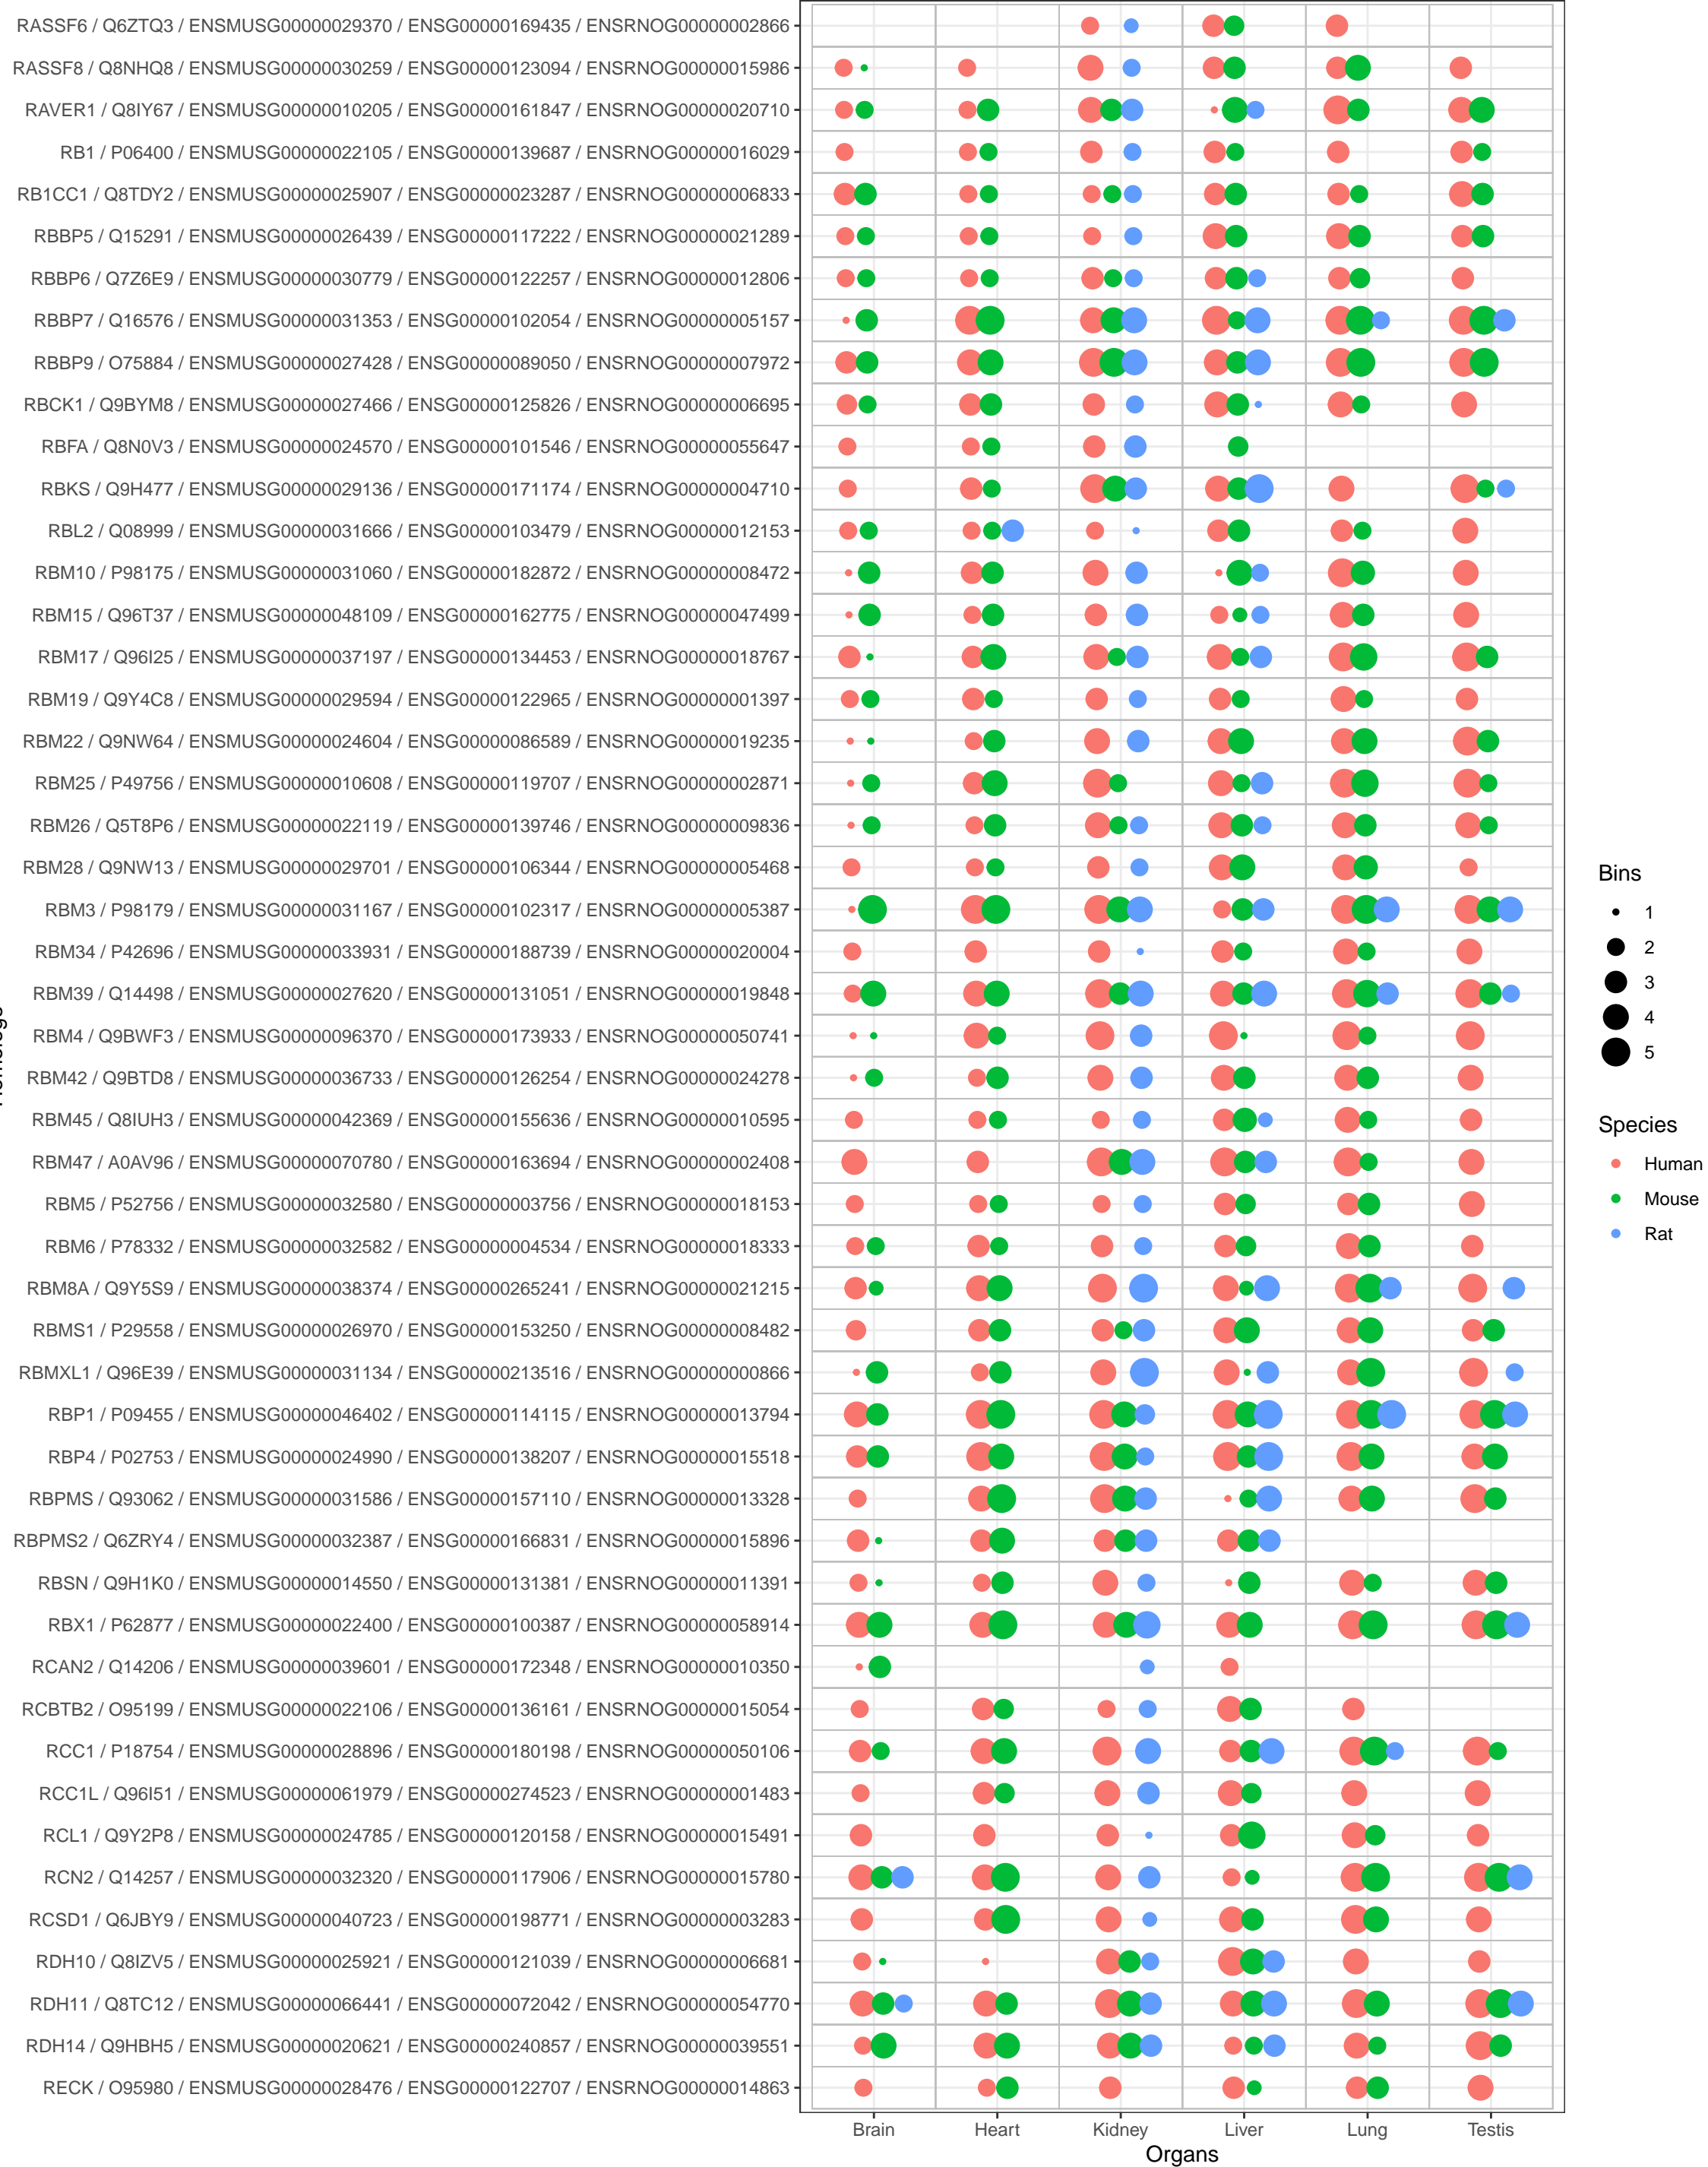

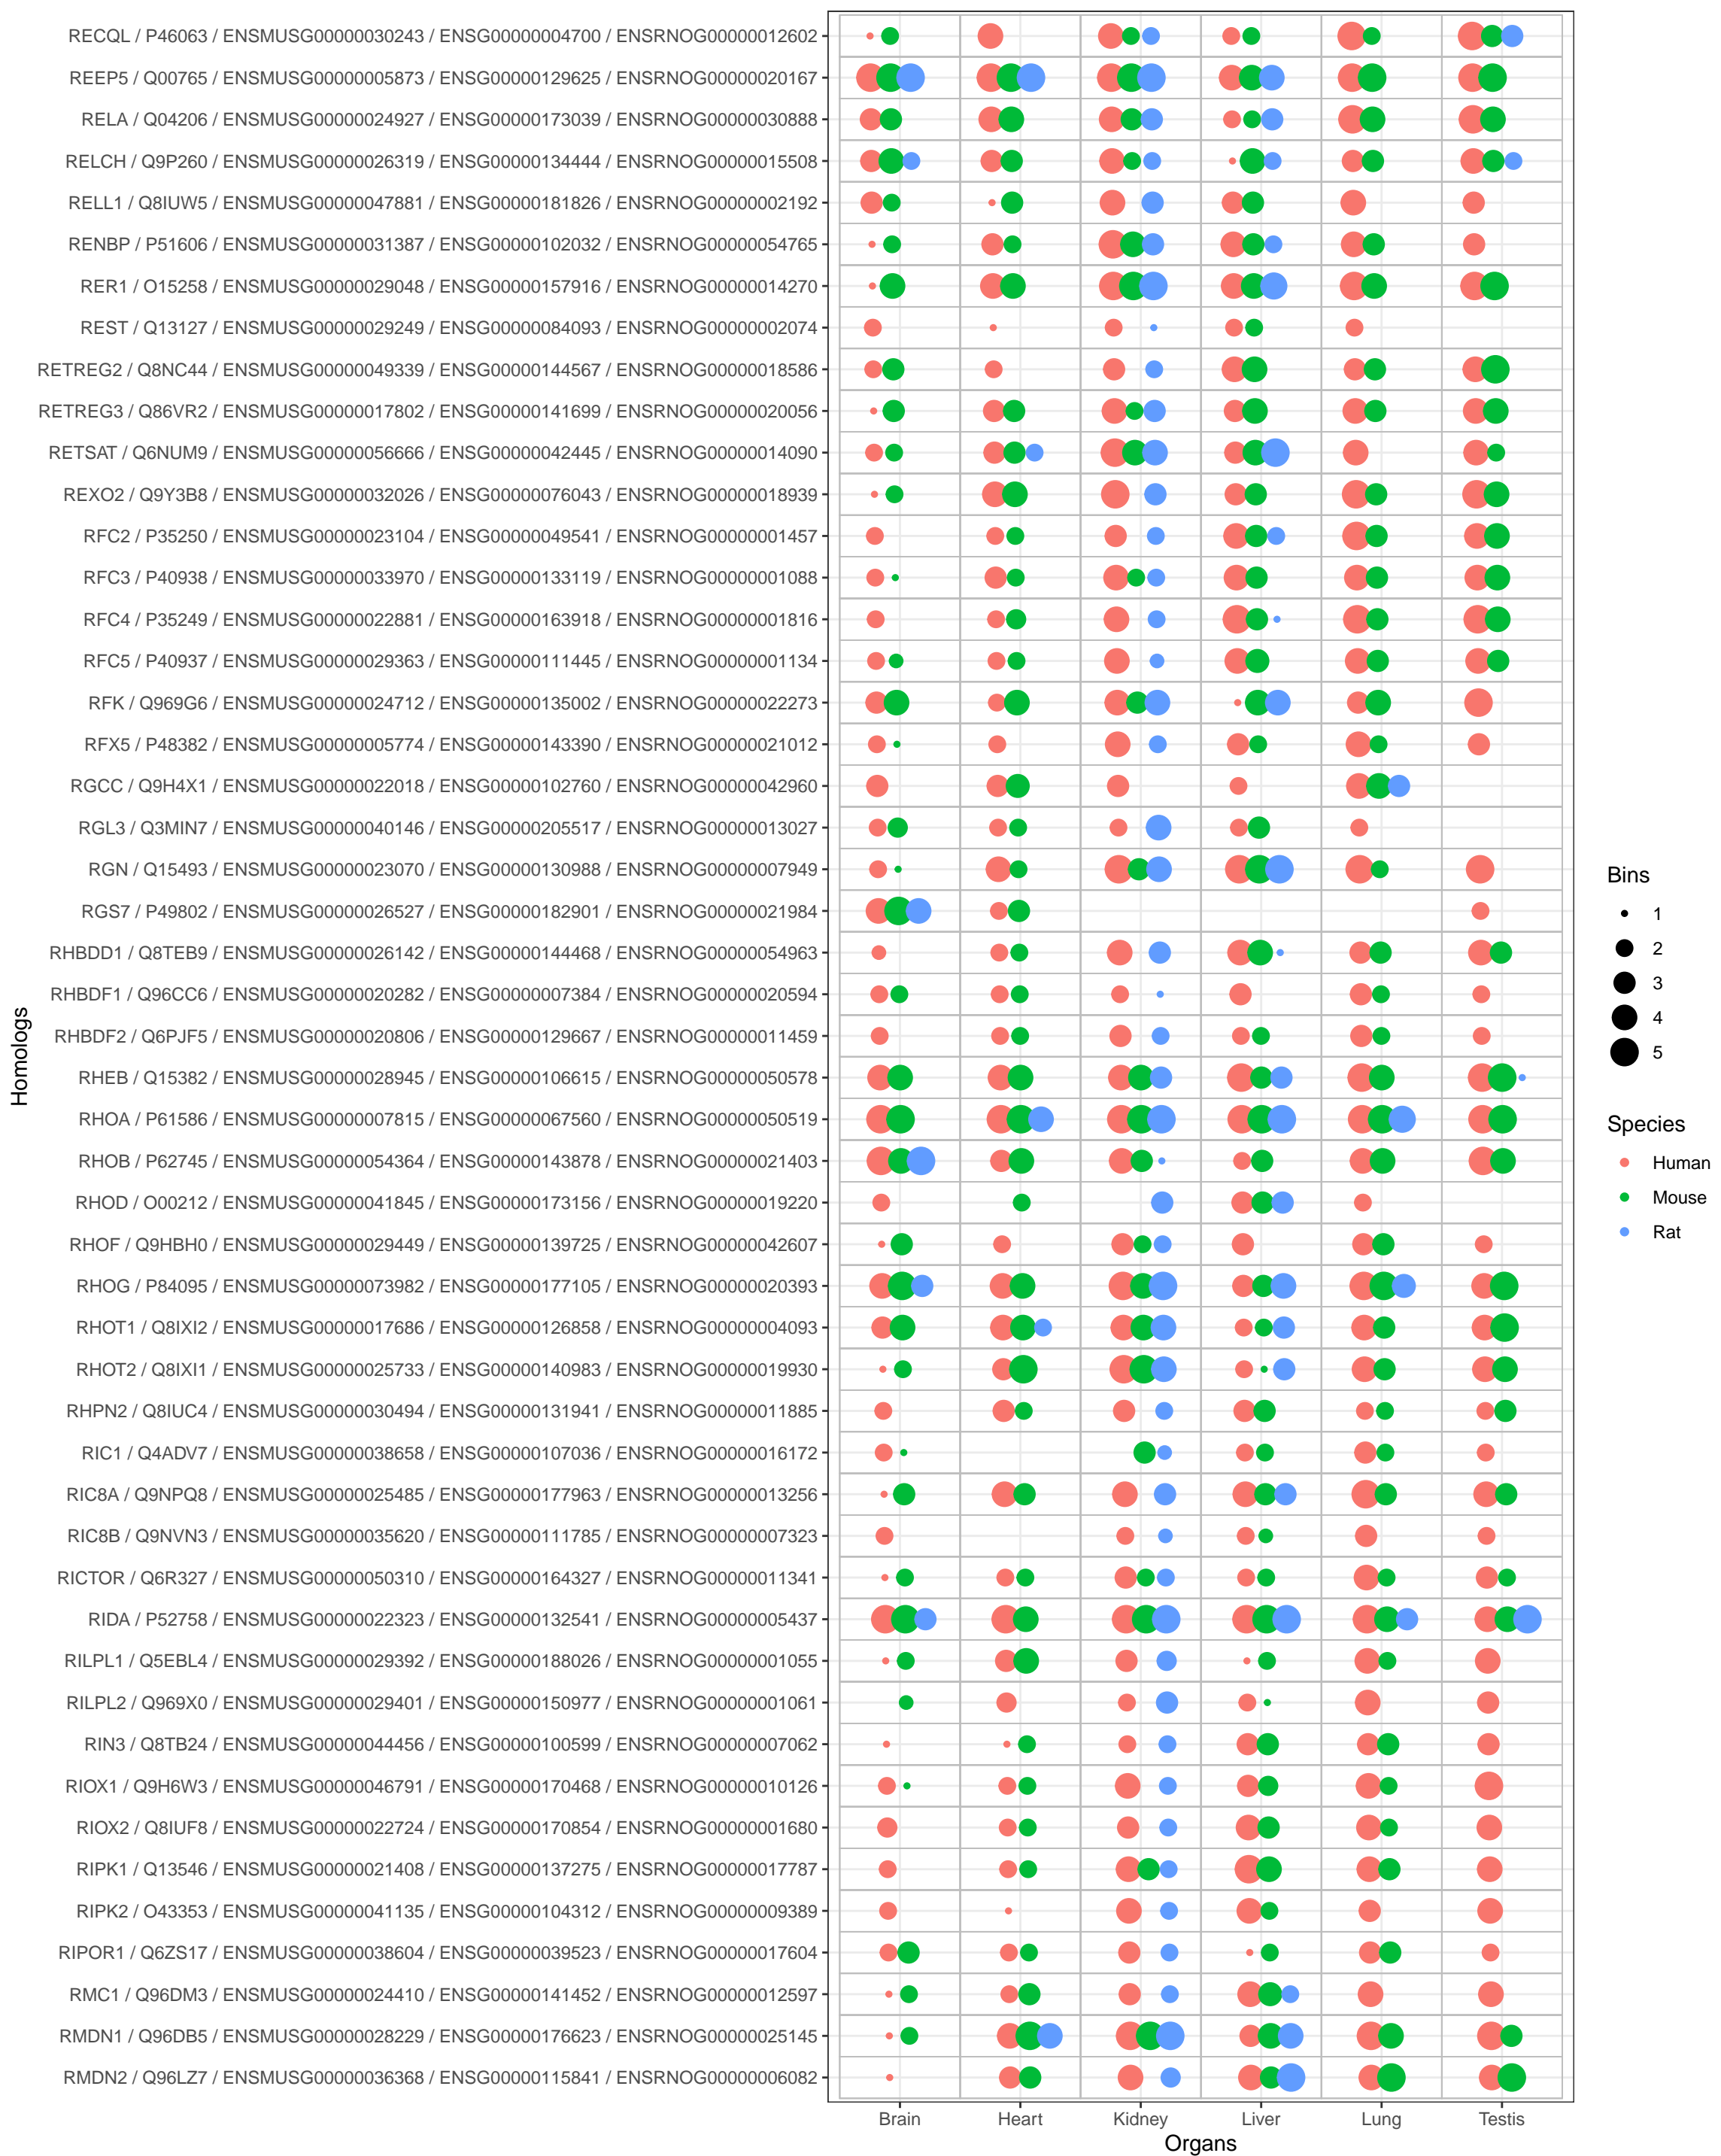

Homologs

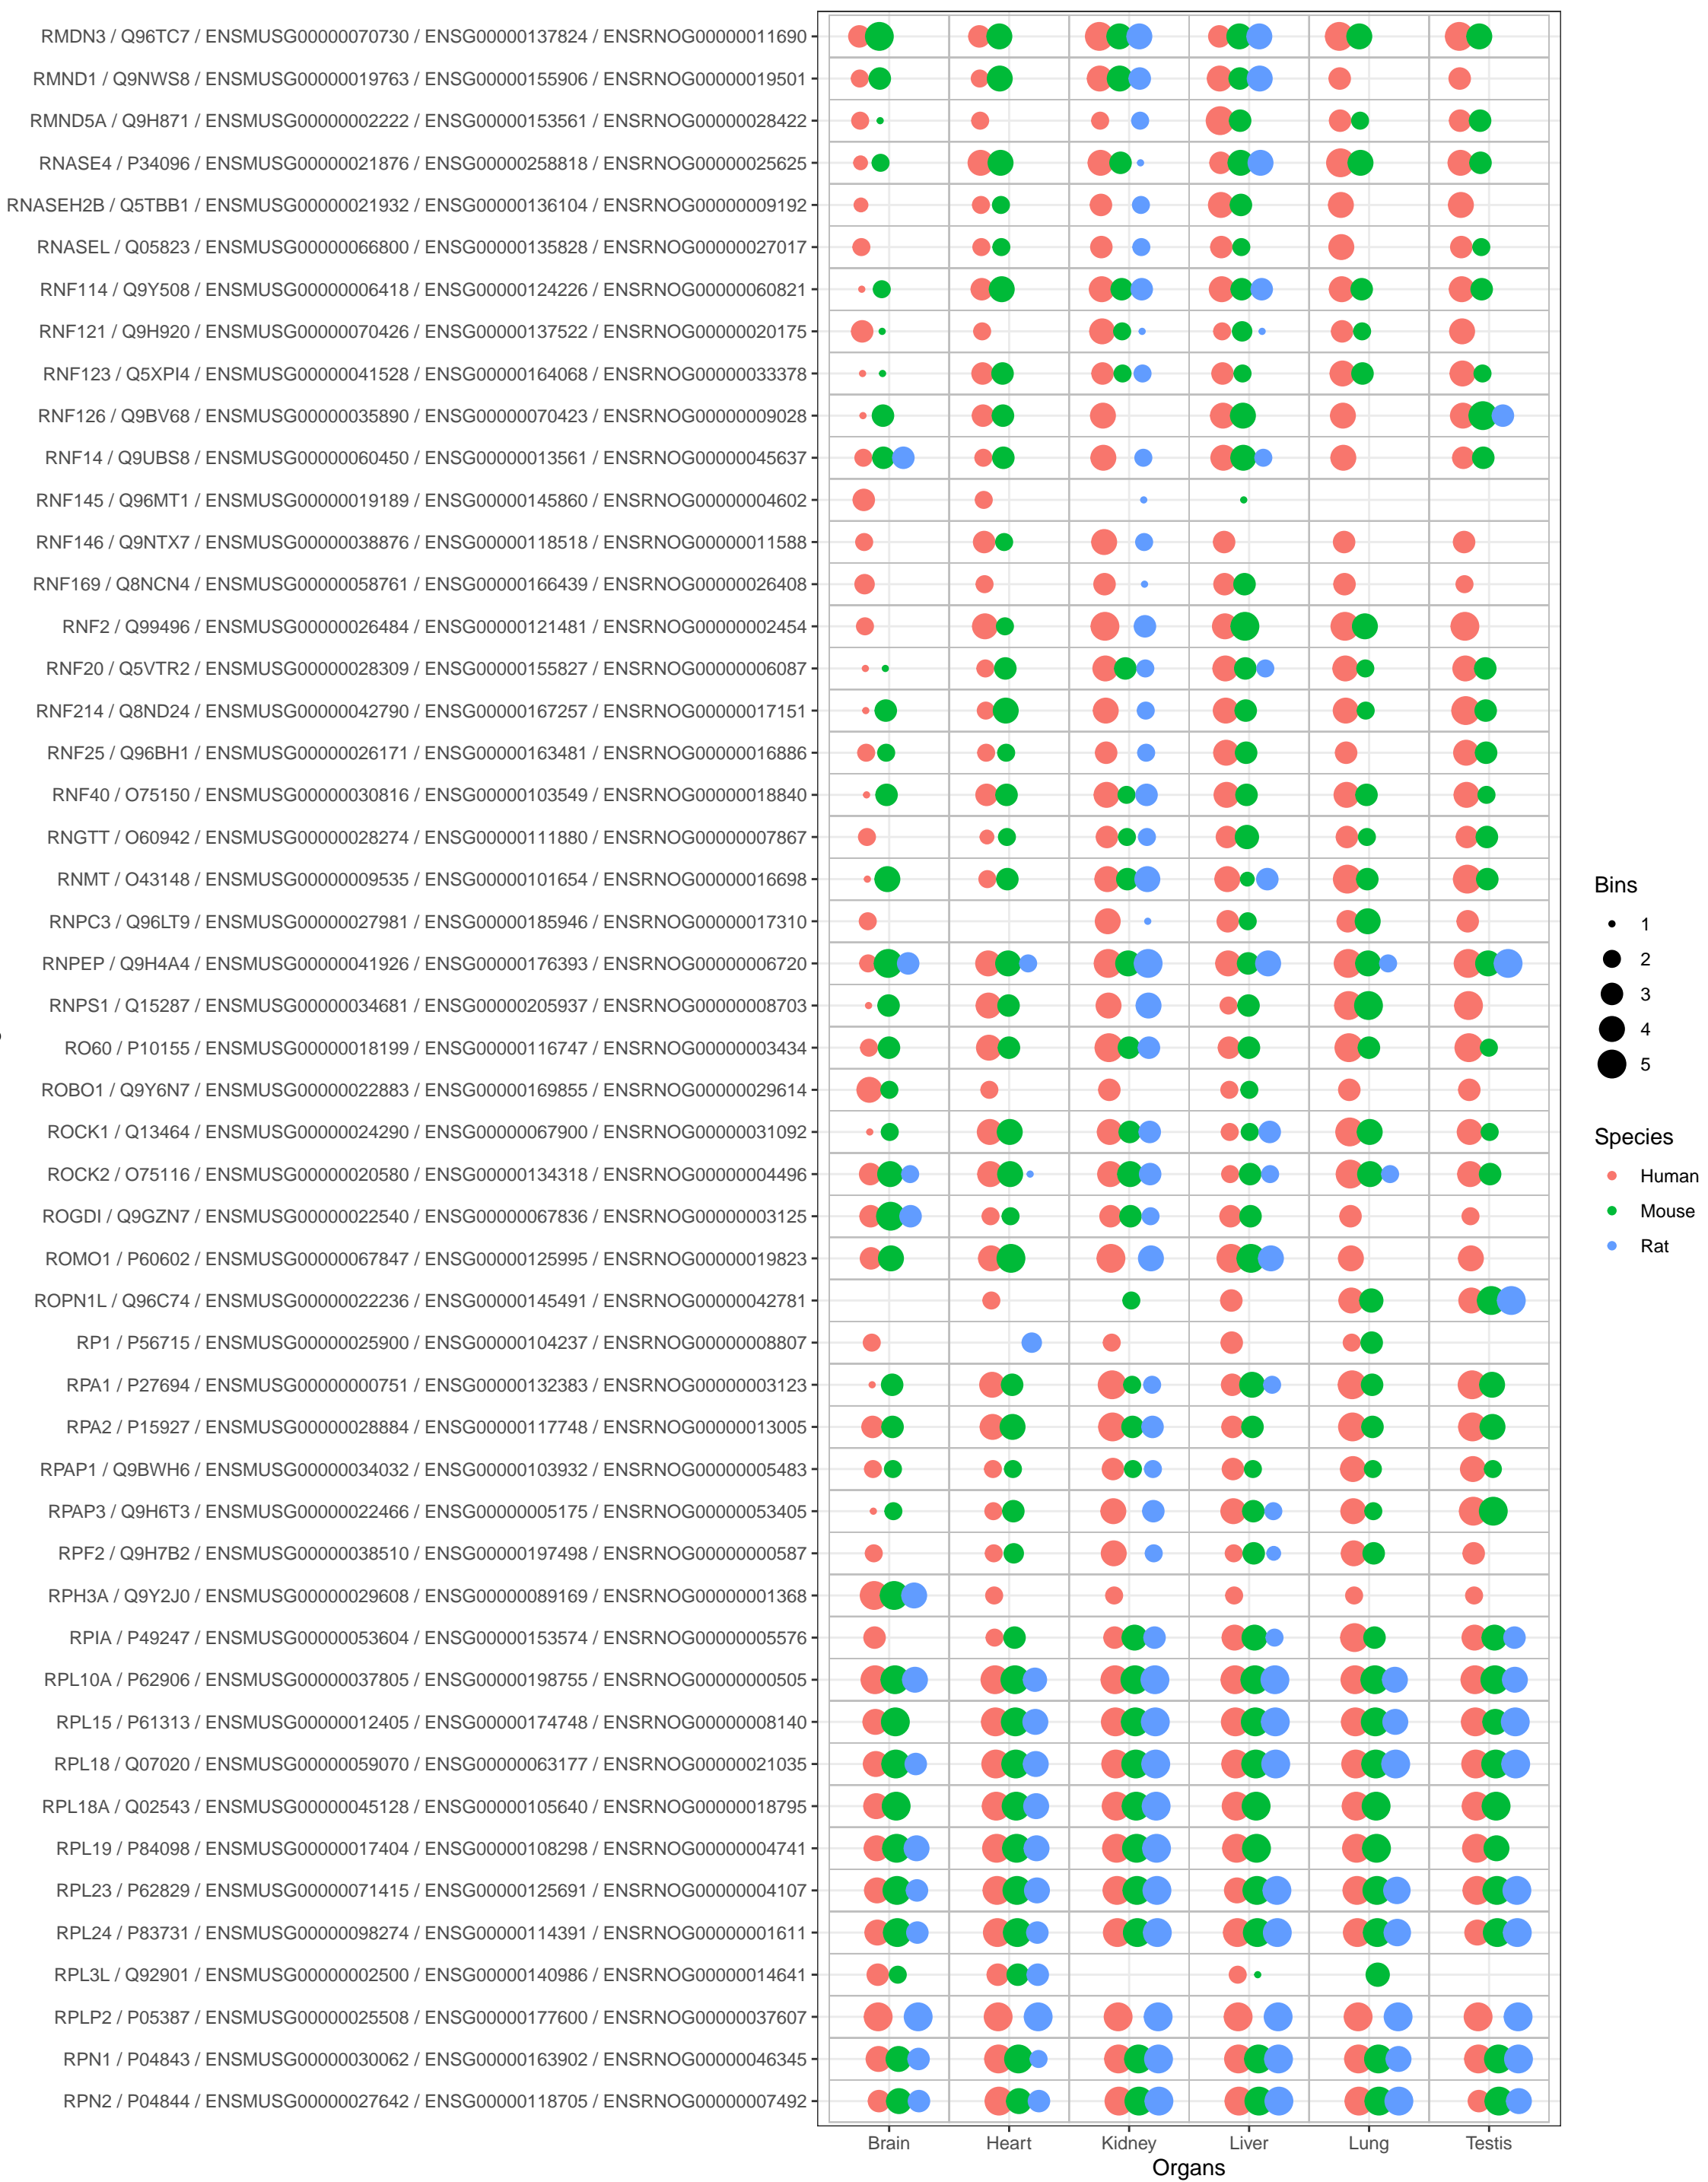

Homologs

|                                                                              |  |  |  |  |  |
|------------------------------------------------------------------------------|--|--|--|--|--|
| RPP30 / P78346 / ENSMUSG00000024800 / ENSG00000148688 / ENSRNOG00000018718   |  |  |  |  |  |
| RPP38 / P78345 / ENSMUSG00000049950 / ENSG00000152464 / ENSRNOG00000038025   |  |  |  |  |  |
| RPRD1A / Q96P16 / ENSMUSG00000040446 / ENSG00000141425 / ENSRNOG00000016036  |  |  |  |  |  |
| RPRD1B / Q9NQG5 / ENSMUSG00000027651 / ENSG00000101413 / ENSRNOG00000012923  |  |  |  |  |  |
| RPRD2 / Q5VT52 / ENSMUSG00000028106 / ENSG00000163125 / ENSRNOG00000054294   |  |  |  |  |  |
| RPS11 / P62280 / ENSMUSG00000003429 / ENSG00000142534 / ENSRNOG00000020595   |  |  |  |  |  |
| RPS15 / P62841 / ENSMUSG00000063457 / ENSG00000115268 / ENSRNOG00000024603   |  |  |  |  |  |
| RPS16 / P62249 / ENSMUSG00000037563 / ENSG00000105193 / ENSRNOG00000019578   |  |  |  |  |  |
| RPS2 / P15880 / ENSMUSG00000044533 / ENSG00000140988 / ENSRNOG00000032289    |  |  |  |  |  |
| RPS27L / Q71UM5 / ENSMUSG00000036781 / ENSG00000185088 / ENSRNOG00000050473  |  |  |  |  |  |
| RPS3A / P61247 / ENSMUSG00000028081 / ENSG00000145425 / ENSRNOG00000011893   |  |  |  |  |  |
| RPS4X / P62701 / ENSMUSG00000031320 / ENSG00000198034 / ENSRNOG00000031041   |  |  |  |  |  |
| RPS5 / P46782 / ENSMUSG00000012848 / ENSG00000083845 / ENSRNOG00000019453    |  |  |  |  |  |
| RPS6KA3 / P51812 / ENSMUSG00000031309 / ENSG00000177189 / ENSRNOG00000006632 |  |  |  |  |  |
| RPS6KA4 / O75676 / ENSMUSG00000118668 / ENSG00000162302 / ENSRNOG00000021117 |  |  |  |  |  |
| RPS6KA5 / O75582 / ENSMUSG00000021180 / ENSG00000100784 / ENSRNOG00000004362 |  |  |  |  |  |
| RPS6KC1 / Q96S38 / ENSMUSG00000089872 / ENSG00000136643 / ENSRNOG00000003767 |  |  |  |  |  |
| RPTOR / Q8N122 / ENSMUSG00000025583 / ENSG00000141564 / ENSRNOG00000003821   |  |  |  |  |  |
| RPUSD3 / Q6P087 / ENSMUSG00000051169 / ENSG00000156990 / ENSRNOG00000009084  |  |  |  |  |  |
| RPUSD4 / Q96CM3 / ENSMUSG00000032044 / ENSG00000165526 / ENSRNOG00000011567  |  |  |  |  |  |
| RRAD / P55042 / ENSMUSG00000031880 / ENSG00000166592 / ENSRNOG00000011901    |  |  |  |  |  |
| RRAGA / Q7L523 / ENSMUSG00000070934 / ENSG00000155876 / ENSRNOG00000007051   |  |  |  |  |  |
| RRAGC / Q9HB90 / ENSMUSG00000028646 / ENSG00000116954 / ENSRNOG00000017426   |  |  |  |  |  |
| RRAGD / Q9NQL2 / ENSMUSG00000028278 / ENSG00000025039 / ENSRNOG00000007331   |  |  |  |  |  |
| RRAS / P10301 / ENSMUSG00000038387 / ENSG00000126458 / ENSRNOG00000037247    |  |  |  |  |  |
| RRAS2 / P62070 / ENSMUSG00000055723 / ENSG00000133818 / ENSRNOG00000012258   |  |  |  |  |  |
| RRBP1 / Q9P2E9 / ENSMUSG00000027422 / ENSG00000125844 / ENSRNOG00000005958   |  |  |  |  |  |
| RREB1 / Q92766 / ENSMUSG00000039087 / ENSG00000124782 / ENSRNOG00000015701   |  |  |  |  |  |
| RRM1 / P23921 / ENSMUSG00000030978 / ENSG00000167325 / ENSRNOG00000045752    |  |  |  |  |  |
| RRM2B / Q7LG56 / ENSMUSG00000022292 / ENSG00000048392 / ENSRNOG00000025454   |  |  |  |  |  |
| RRP1 / P56182 / ENSMUSG00000061032 / ENSG00000160214 / ENSRNOG00000001203    |  |  |  |  |  |
| RRP12 / Q5JTH9 / ENSMUSG00000035049 / ENSG00000052749 / ENSRNOG00000048495   |  |  |  |  |  |
| RRP1B / Q14684 / ENSMUSG00000058392 / ENSG00000160208 / ENSRNOG00000001194   |  |  |  |  |  |
| RRP7A / Q9Y3A4 / ENSMUSG00000018040 / ENSG00000189306 / ENSRNOG00000022896   |  |  |  |  |  |
| RRP9 / O43818 / ENSMUSG00000041506 / ENSG00000114767 / ENSRNOG00000012927    |  |  |  |  |  |
| RRS1 / Q15050 / ENSMUSG00000061024 / ENSG00000179041 / ENSRNOG00000007240    |  |  |  |  |  |
| RSL1D1 / O76021 / ENSMUSG00000005846 / ENSG00000171490 / ENSRNOG00000061236  |  |  |  |  |  |
| RSRC2 / Q7L4I2 / ENSMUSG00000029422 / ENSG00000111011 / ENSRNOG00000001238   |  |  |  |  |  |
| RTCA / O00442 / ENSMUSG00000000339 / ENSG00000137996 / ENSRNOG00000014575    |  |  |  |  |  |
| RTCB / Q9Y3I0 / ENSMUSG00000001783 / ENSG00000100220 / ENSRNOG00000004813    |  |  |  |  |  |
| RTF1 / Q92541 / ENSMUSG00000027304 / ENSG00000137815 / ENSRNOG00000005183    |  |  |  |  |  |
| RTF2 / Q9BY42 / ENSMUSG00000027502 / ENSG00000022277 / ENSRNOG00000005083    |  |  |  |  |  |
| RTKN / Q9BST9 / ENSMUSG00000034930 / ENSG00000114993 / ENSRNOG00000009022    |  |  |  |  |  |
| RTN1 / Q16799 / ENSMUSG00000021087 / ENSG00000139970 / ENSRNOG00000004794    |  |  |  |  |  |
| RTN2 / O75298 / ENSMUSG00000030401 / ENSG00000125744 / ENSRNOG00000016603    |  |  |  |  |  |
| RTN3 / Q95197 / ENSMUSG00000024758 / ENSG00000133318 / ENSRNOG00000021202    |  |  |  |  |  |
| RTN4 / Q9NQC3 / ENSMUSG00000020458 / ENSG00000115310 / ENSRNOG00000004621    |  |  |  |  |  |
| RTN4IP1 / Q8WWW3 / ENSMUSG00000019864 / ENSG00000130347 / ENSRNOG00000000279 |  |  |  |  |  |
| RTP4 / Q96DX8 / ENSMUSG00000033355 / ENSG00000136514 / ENSRNOG00000028895    |  |  |  |  |  |
| RTRAF / Q9Y224 / ENSMUSG00000021807 / ENSG00000087302 / ENSRNOG00000000340   |  |  |  |  |  |

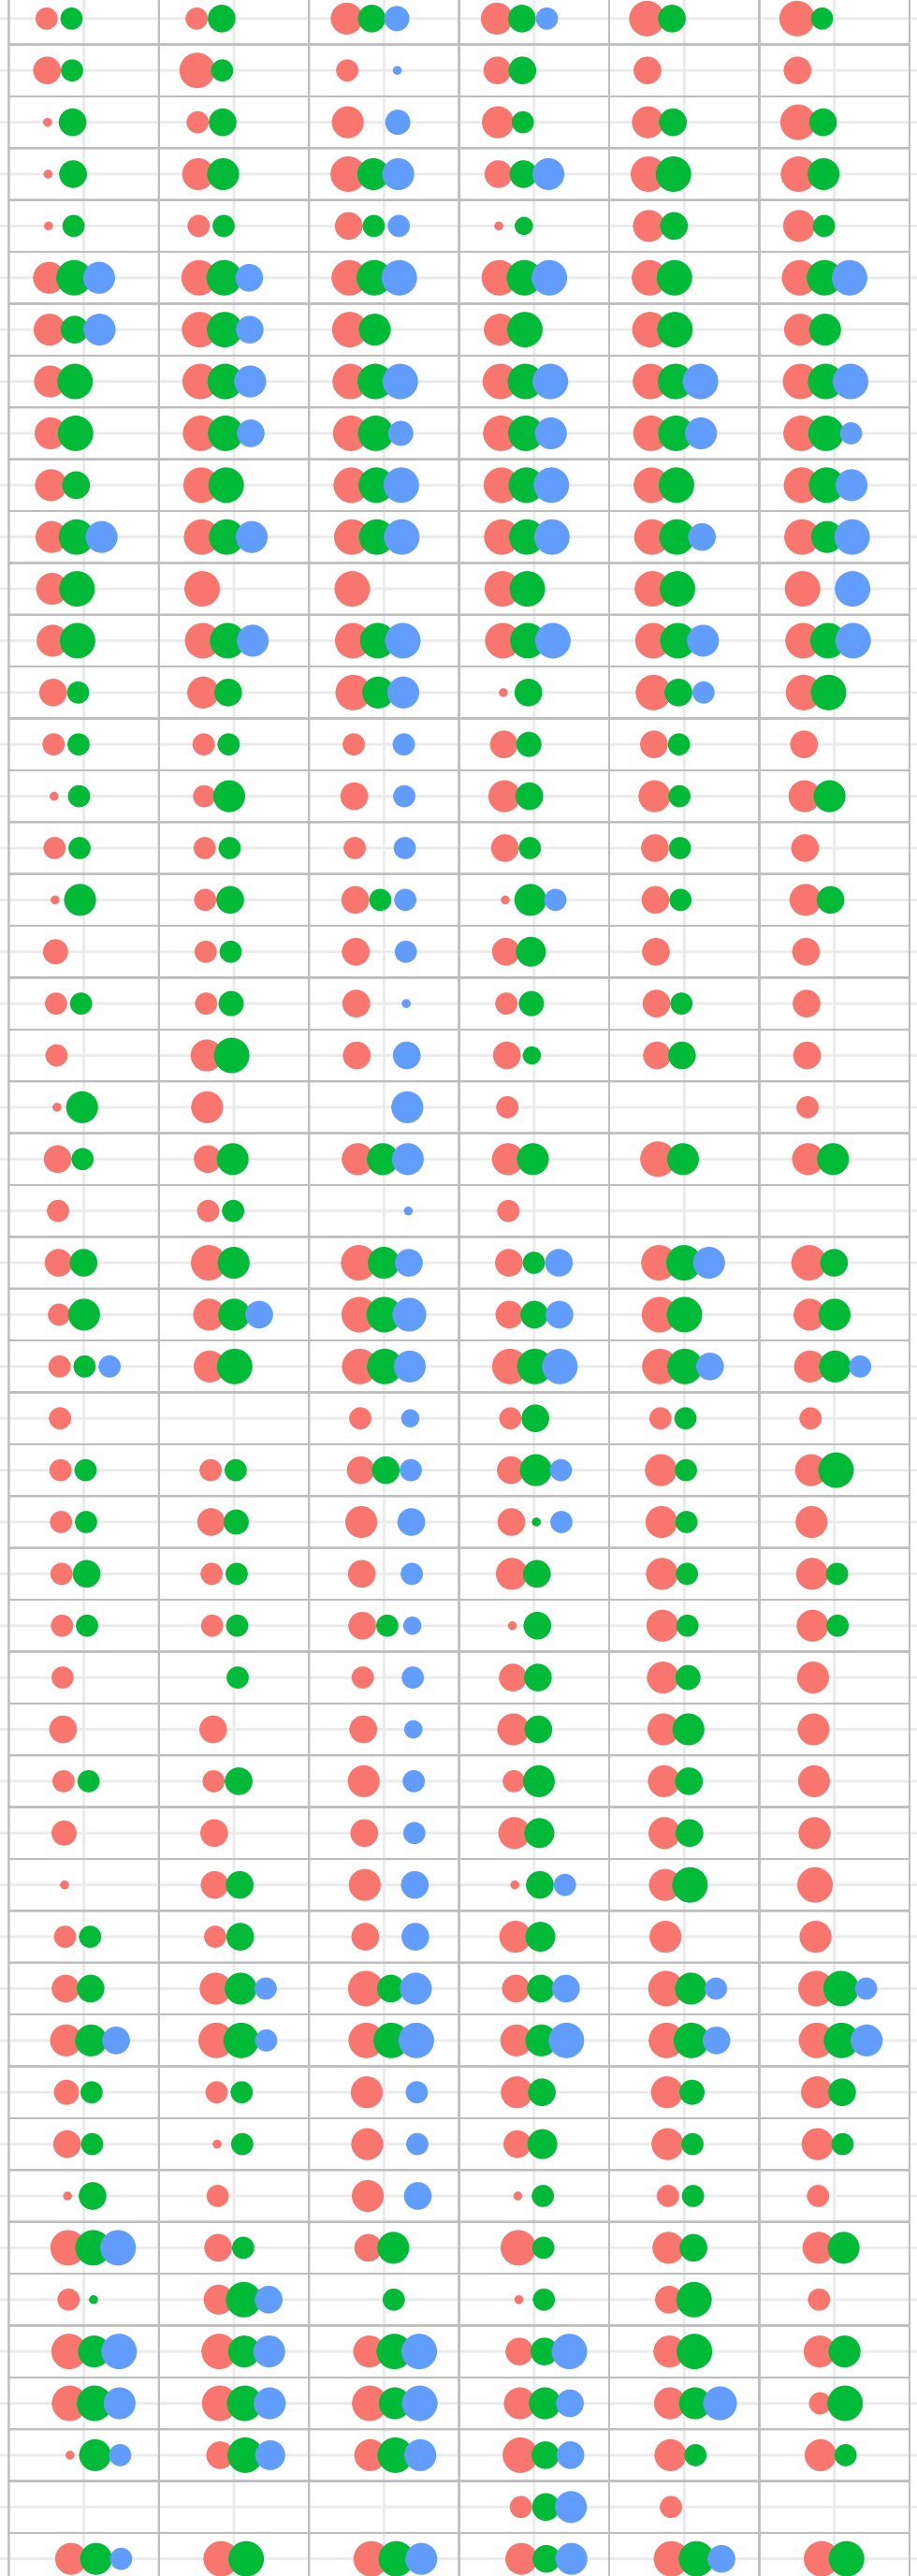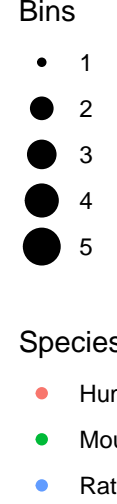

Organs





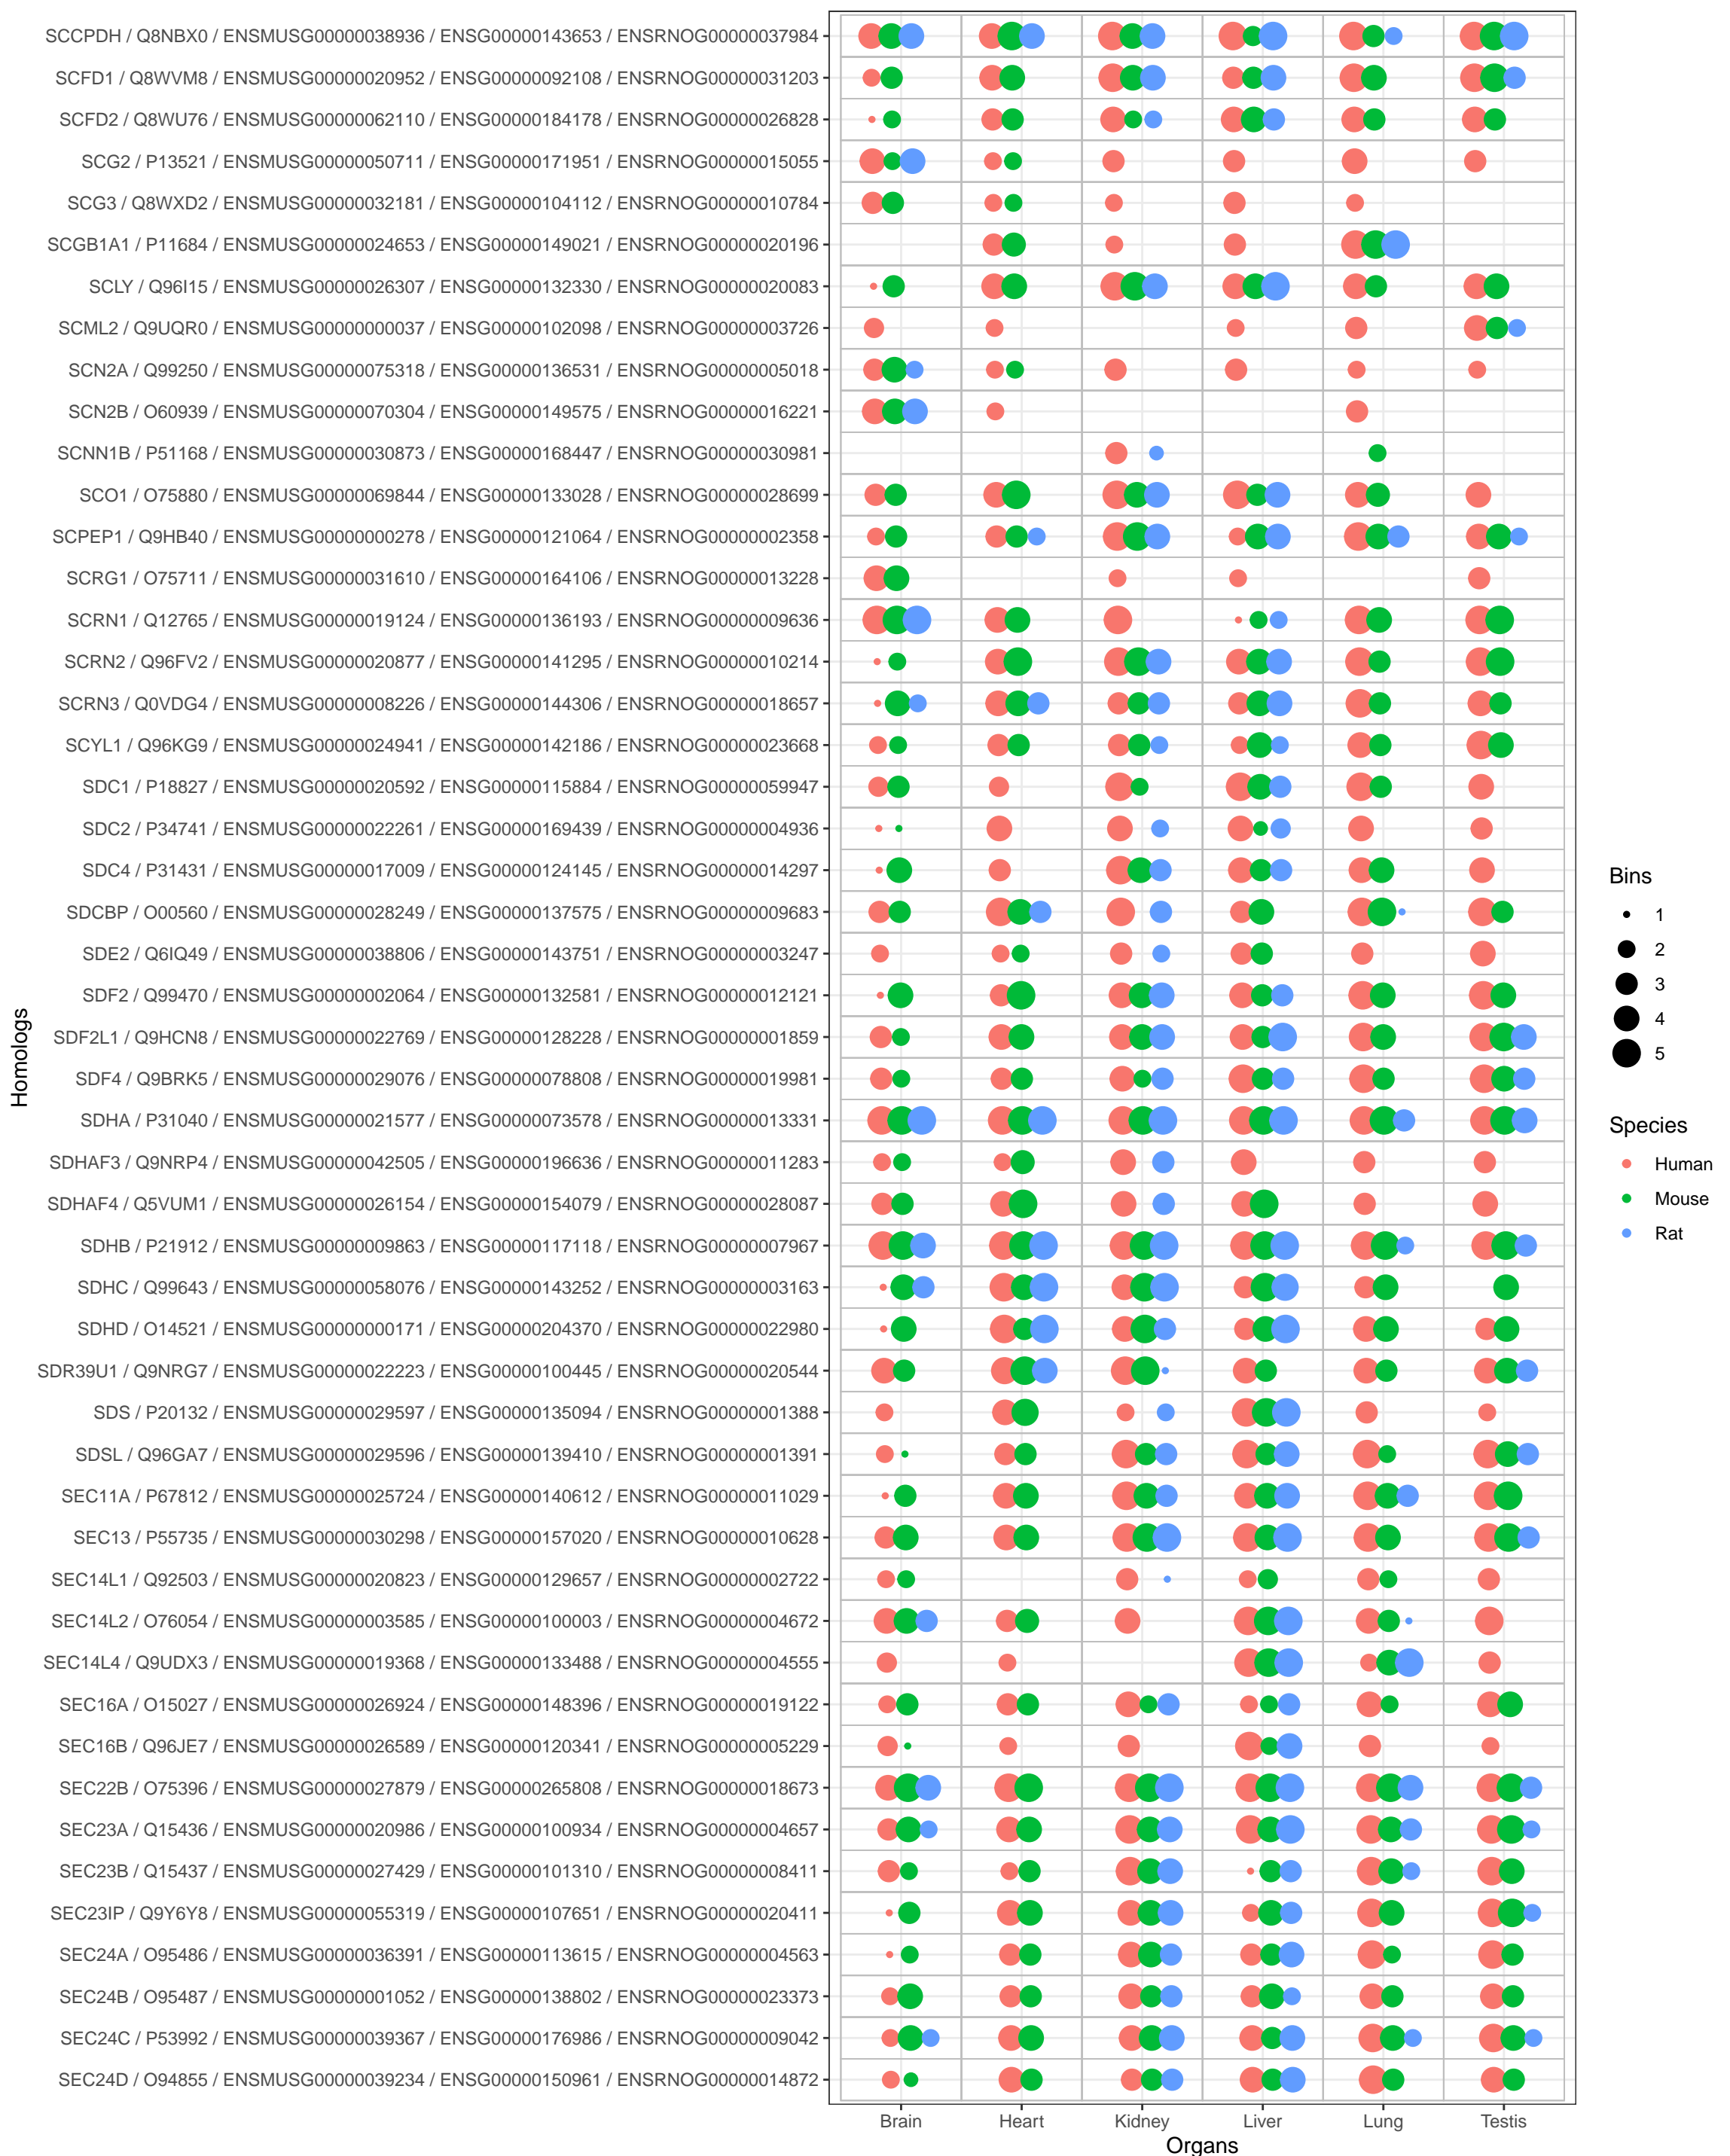

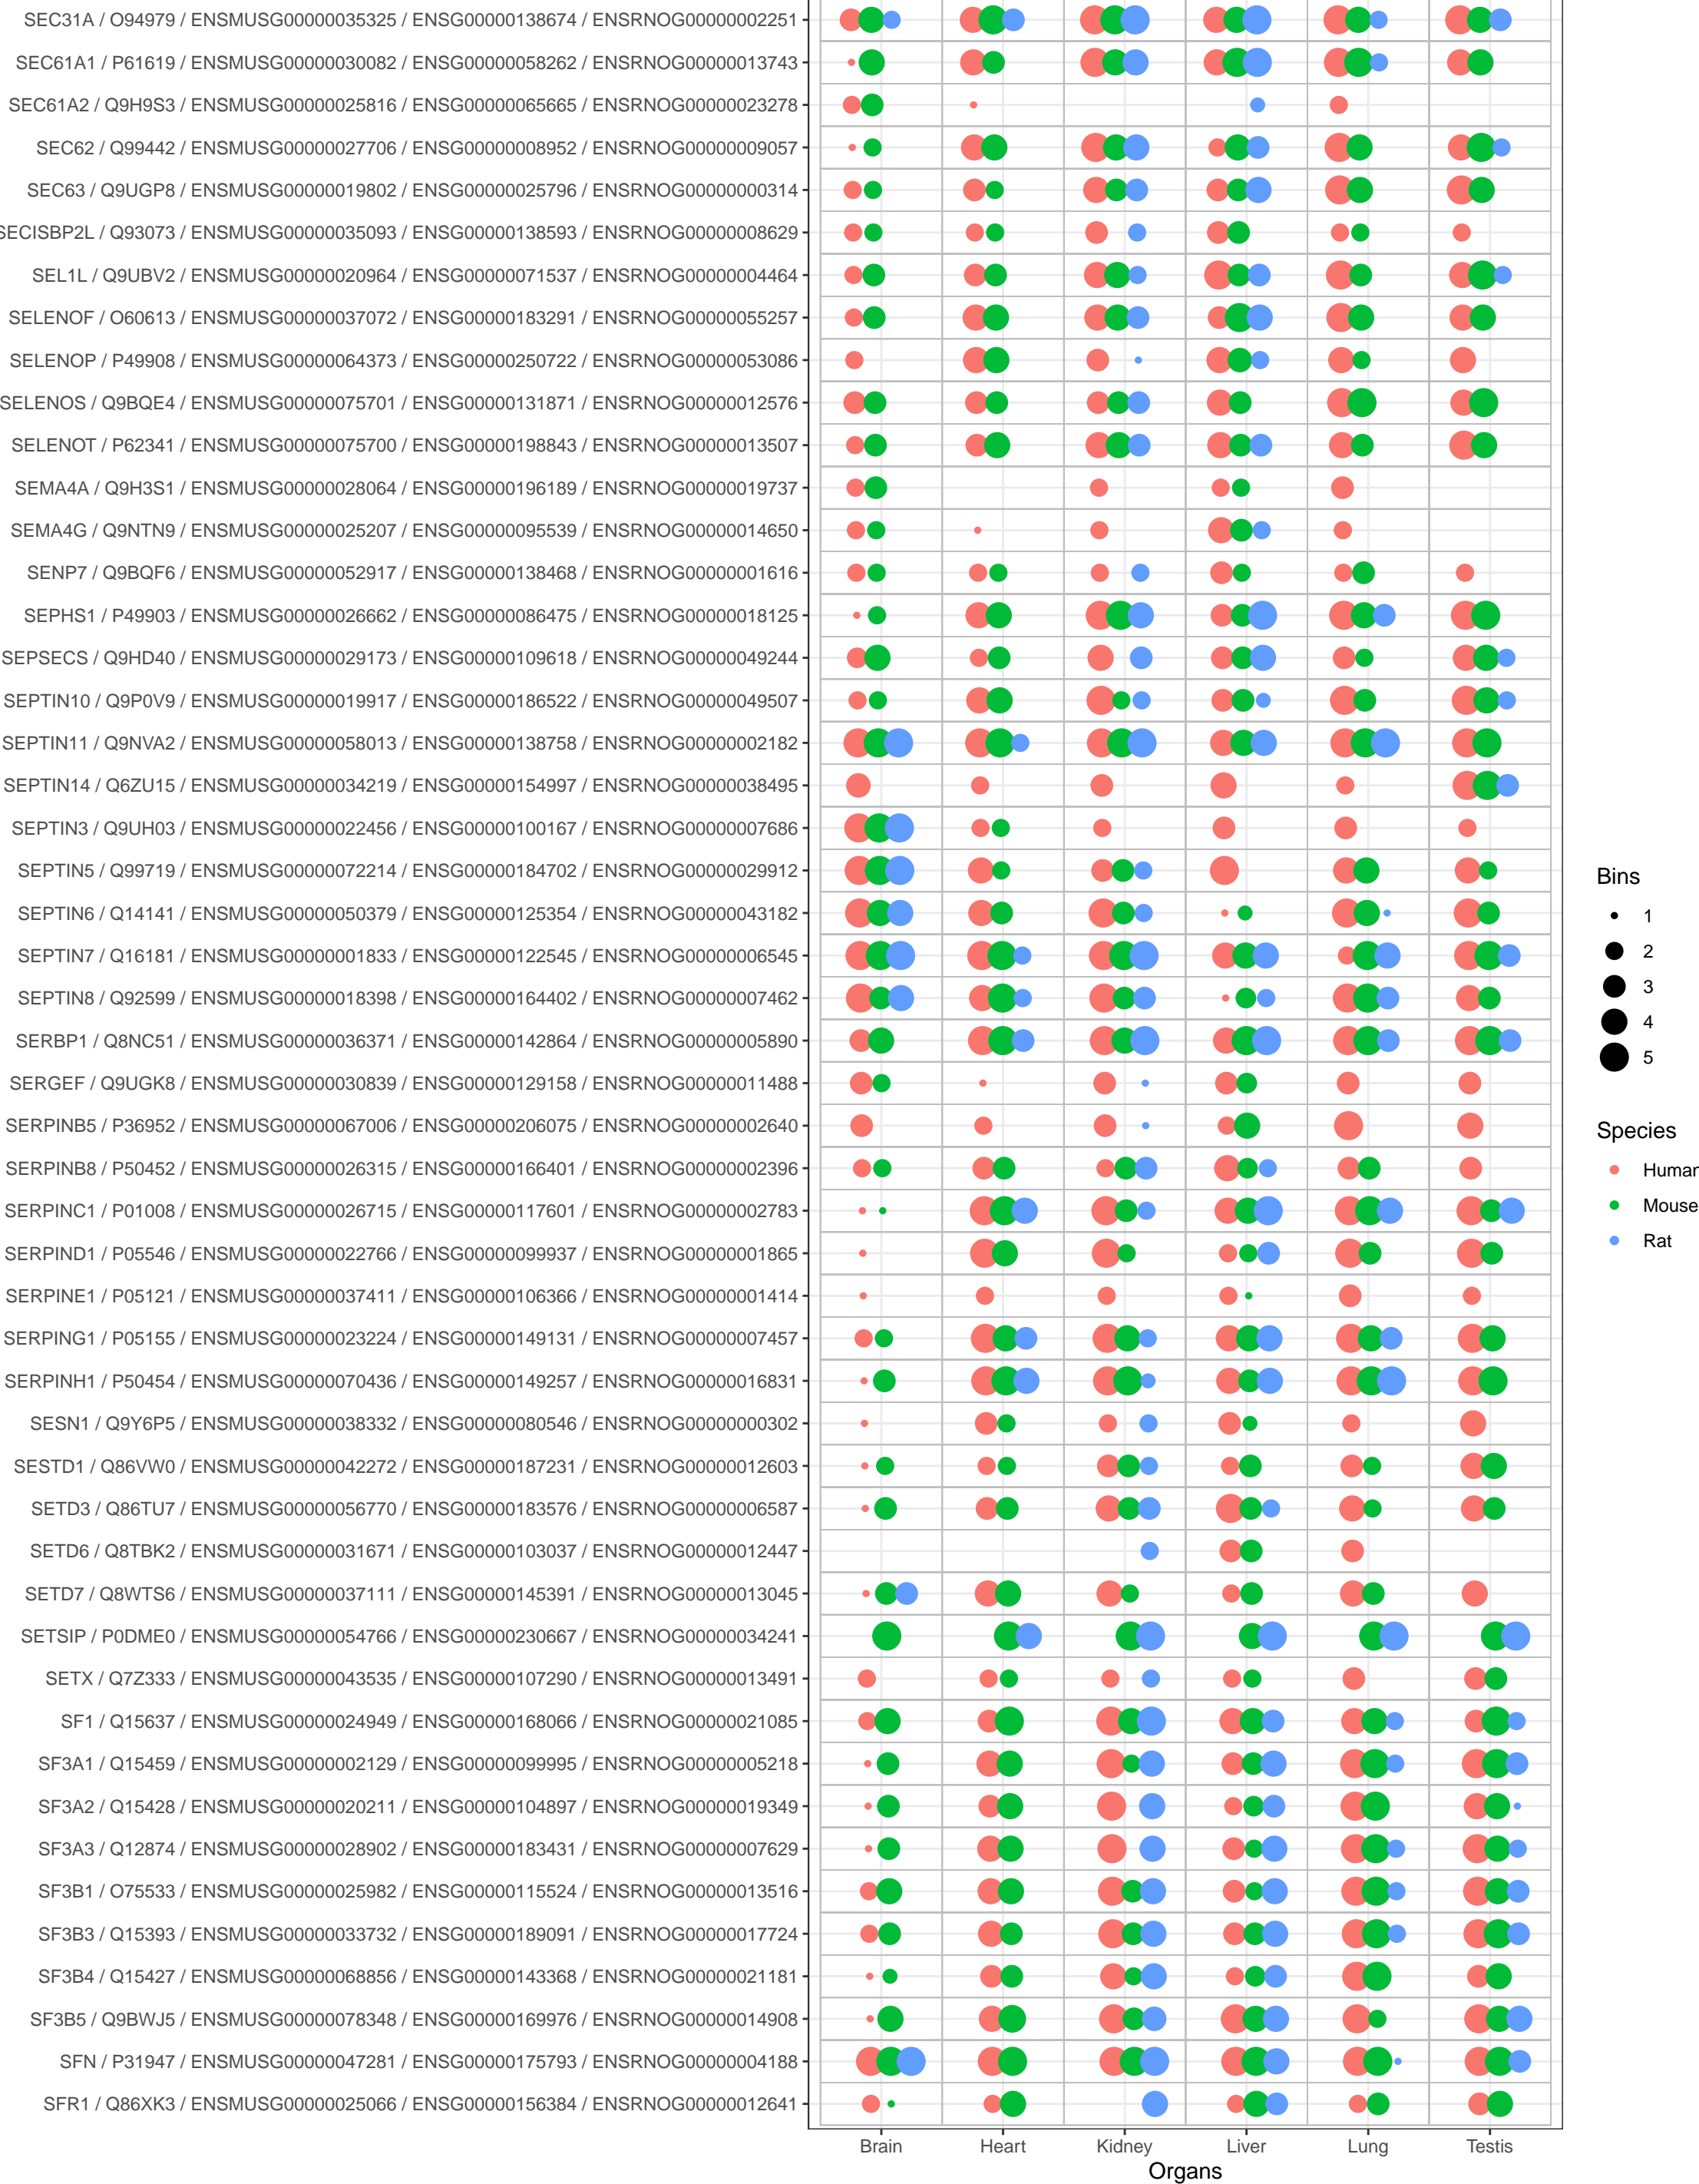

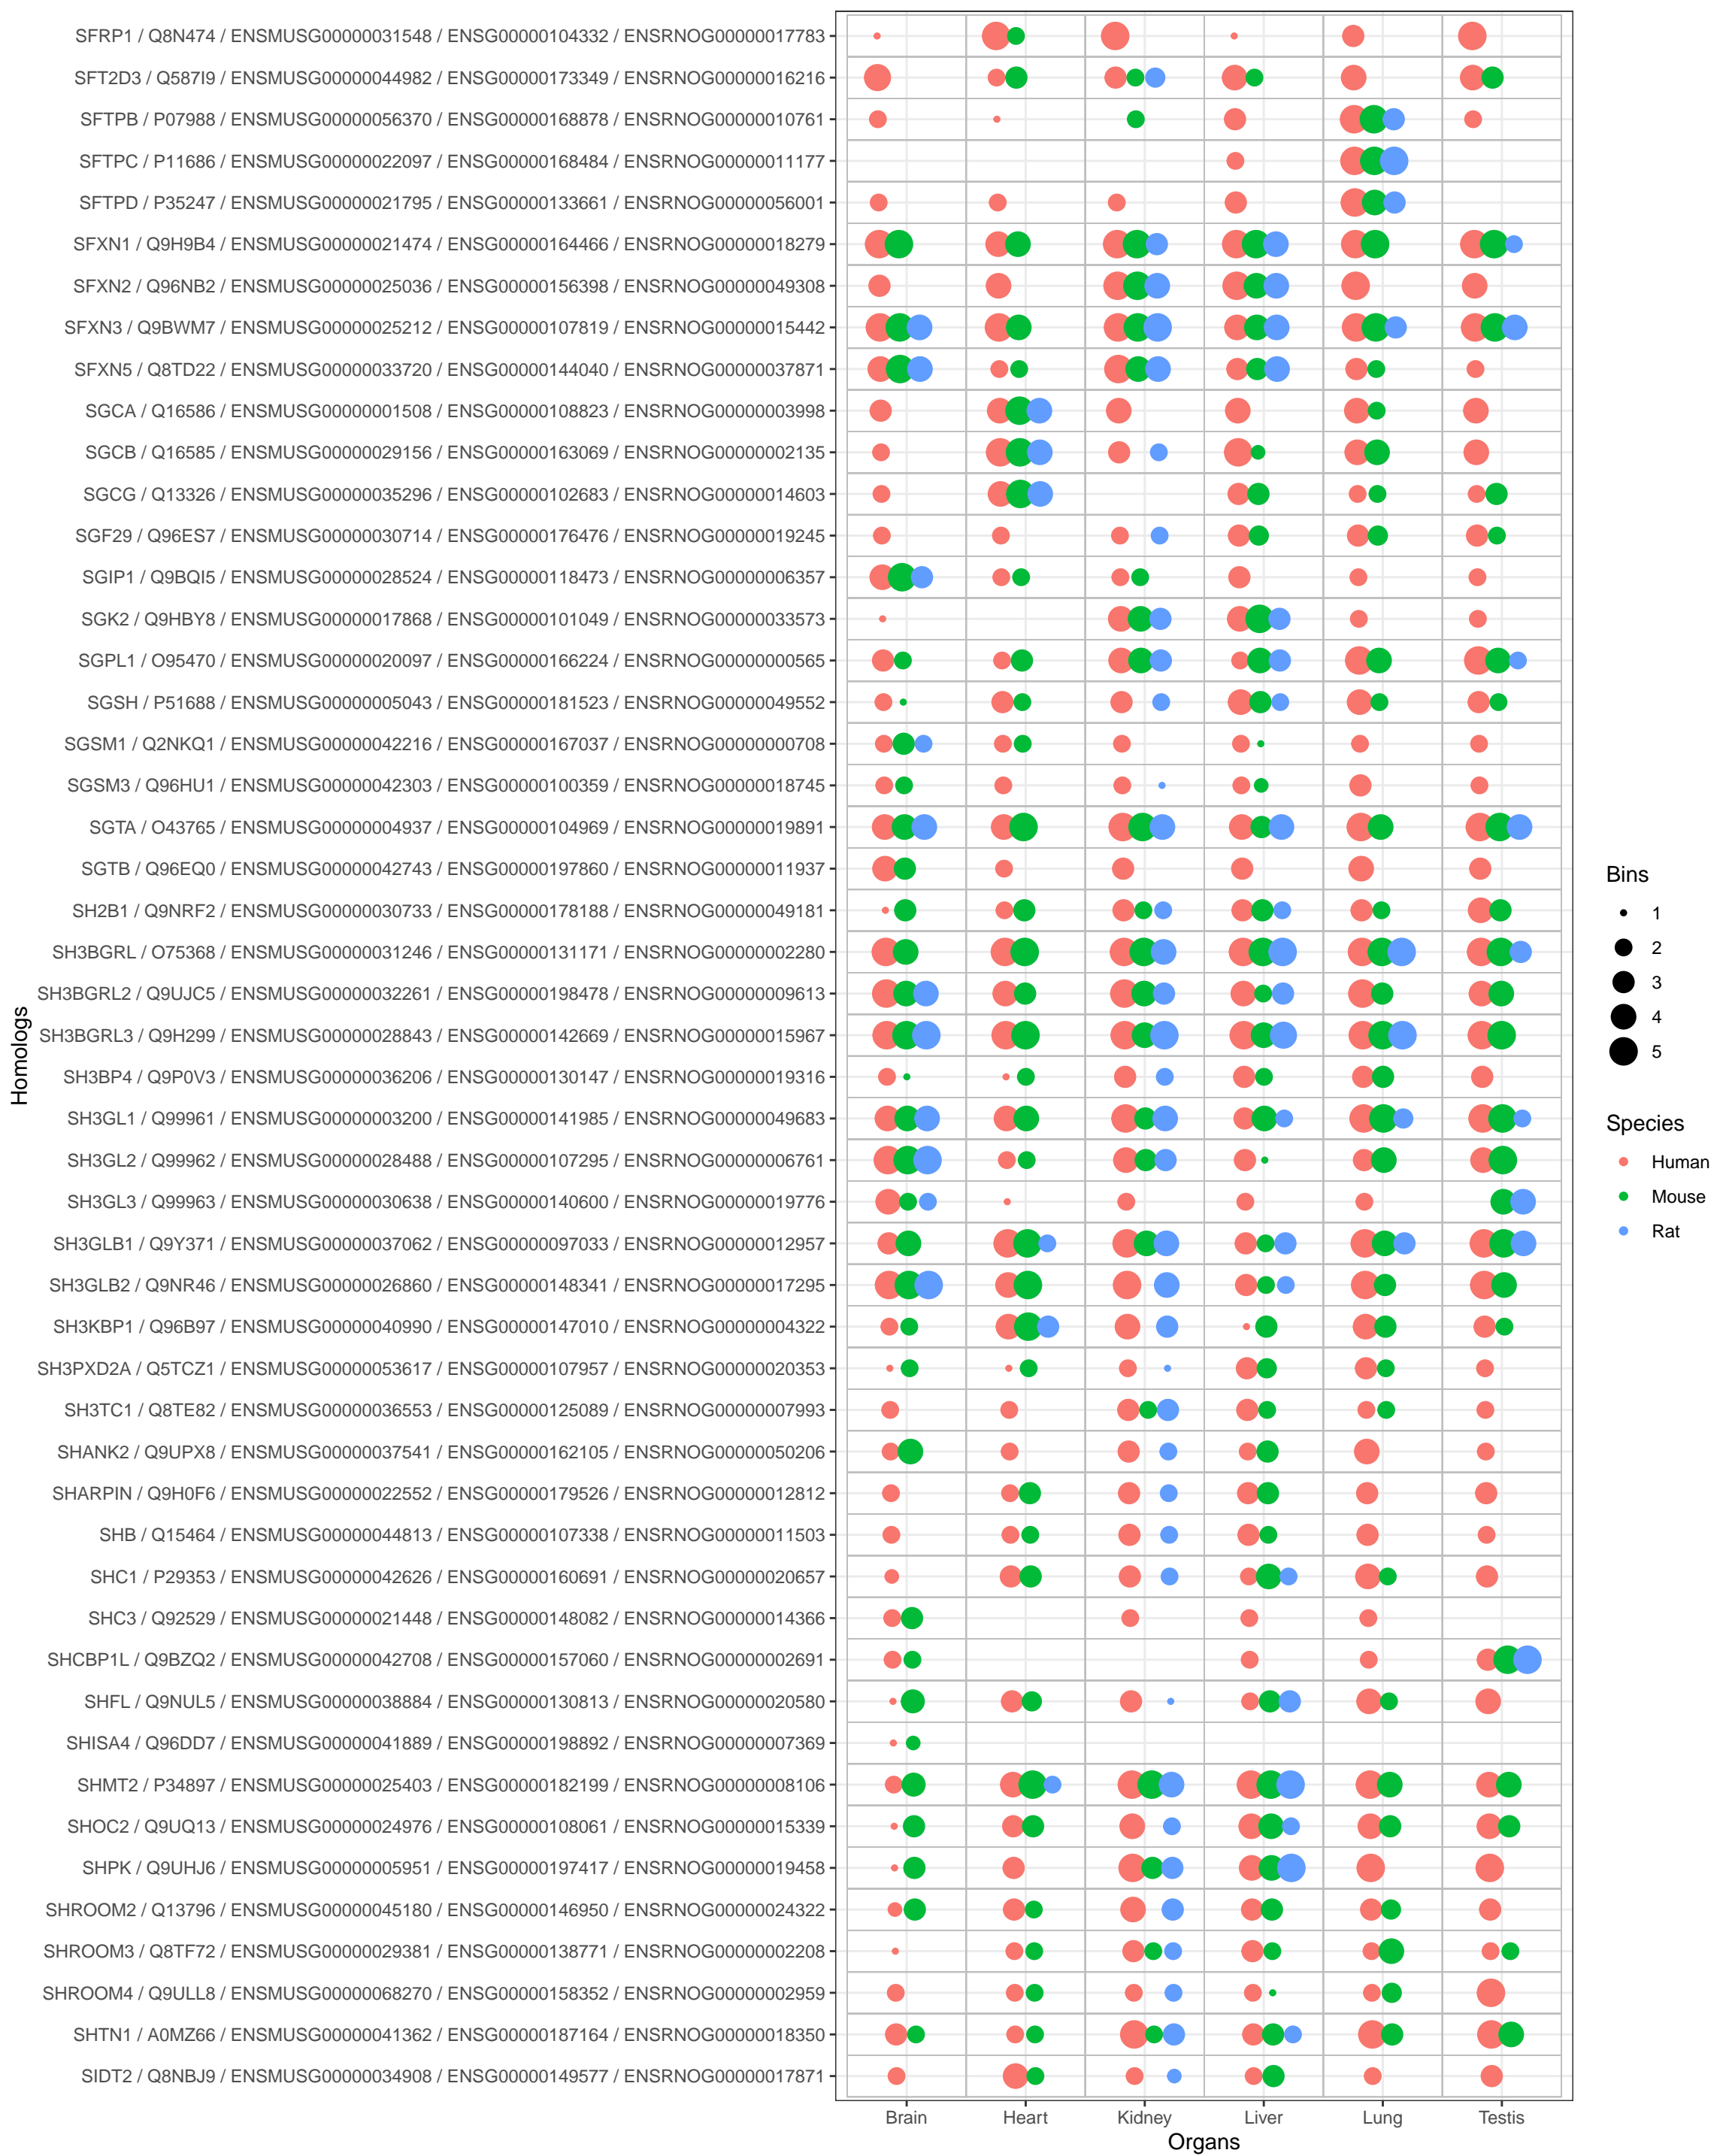

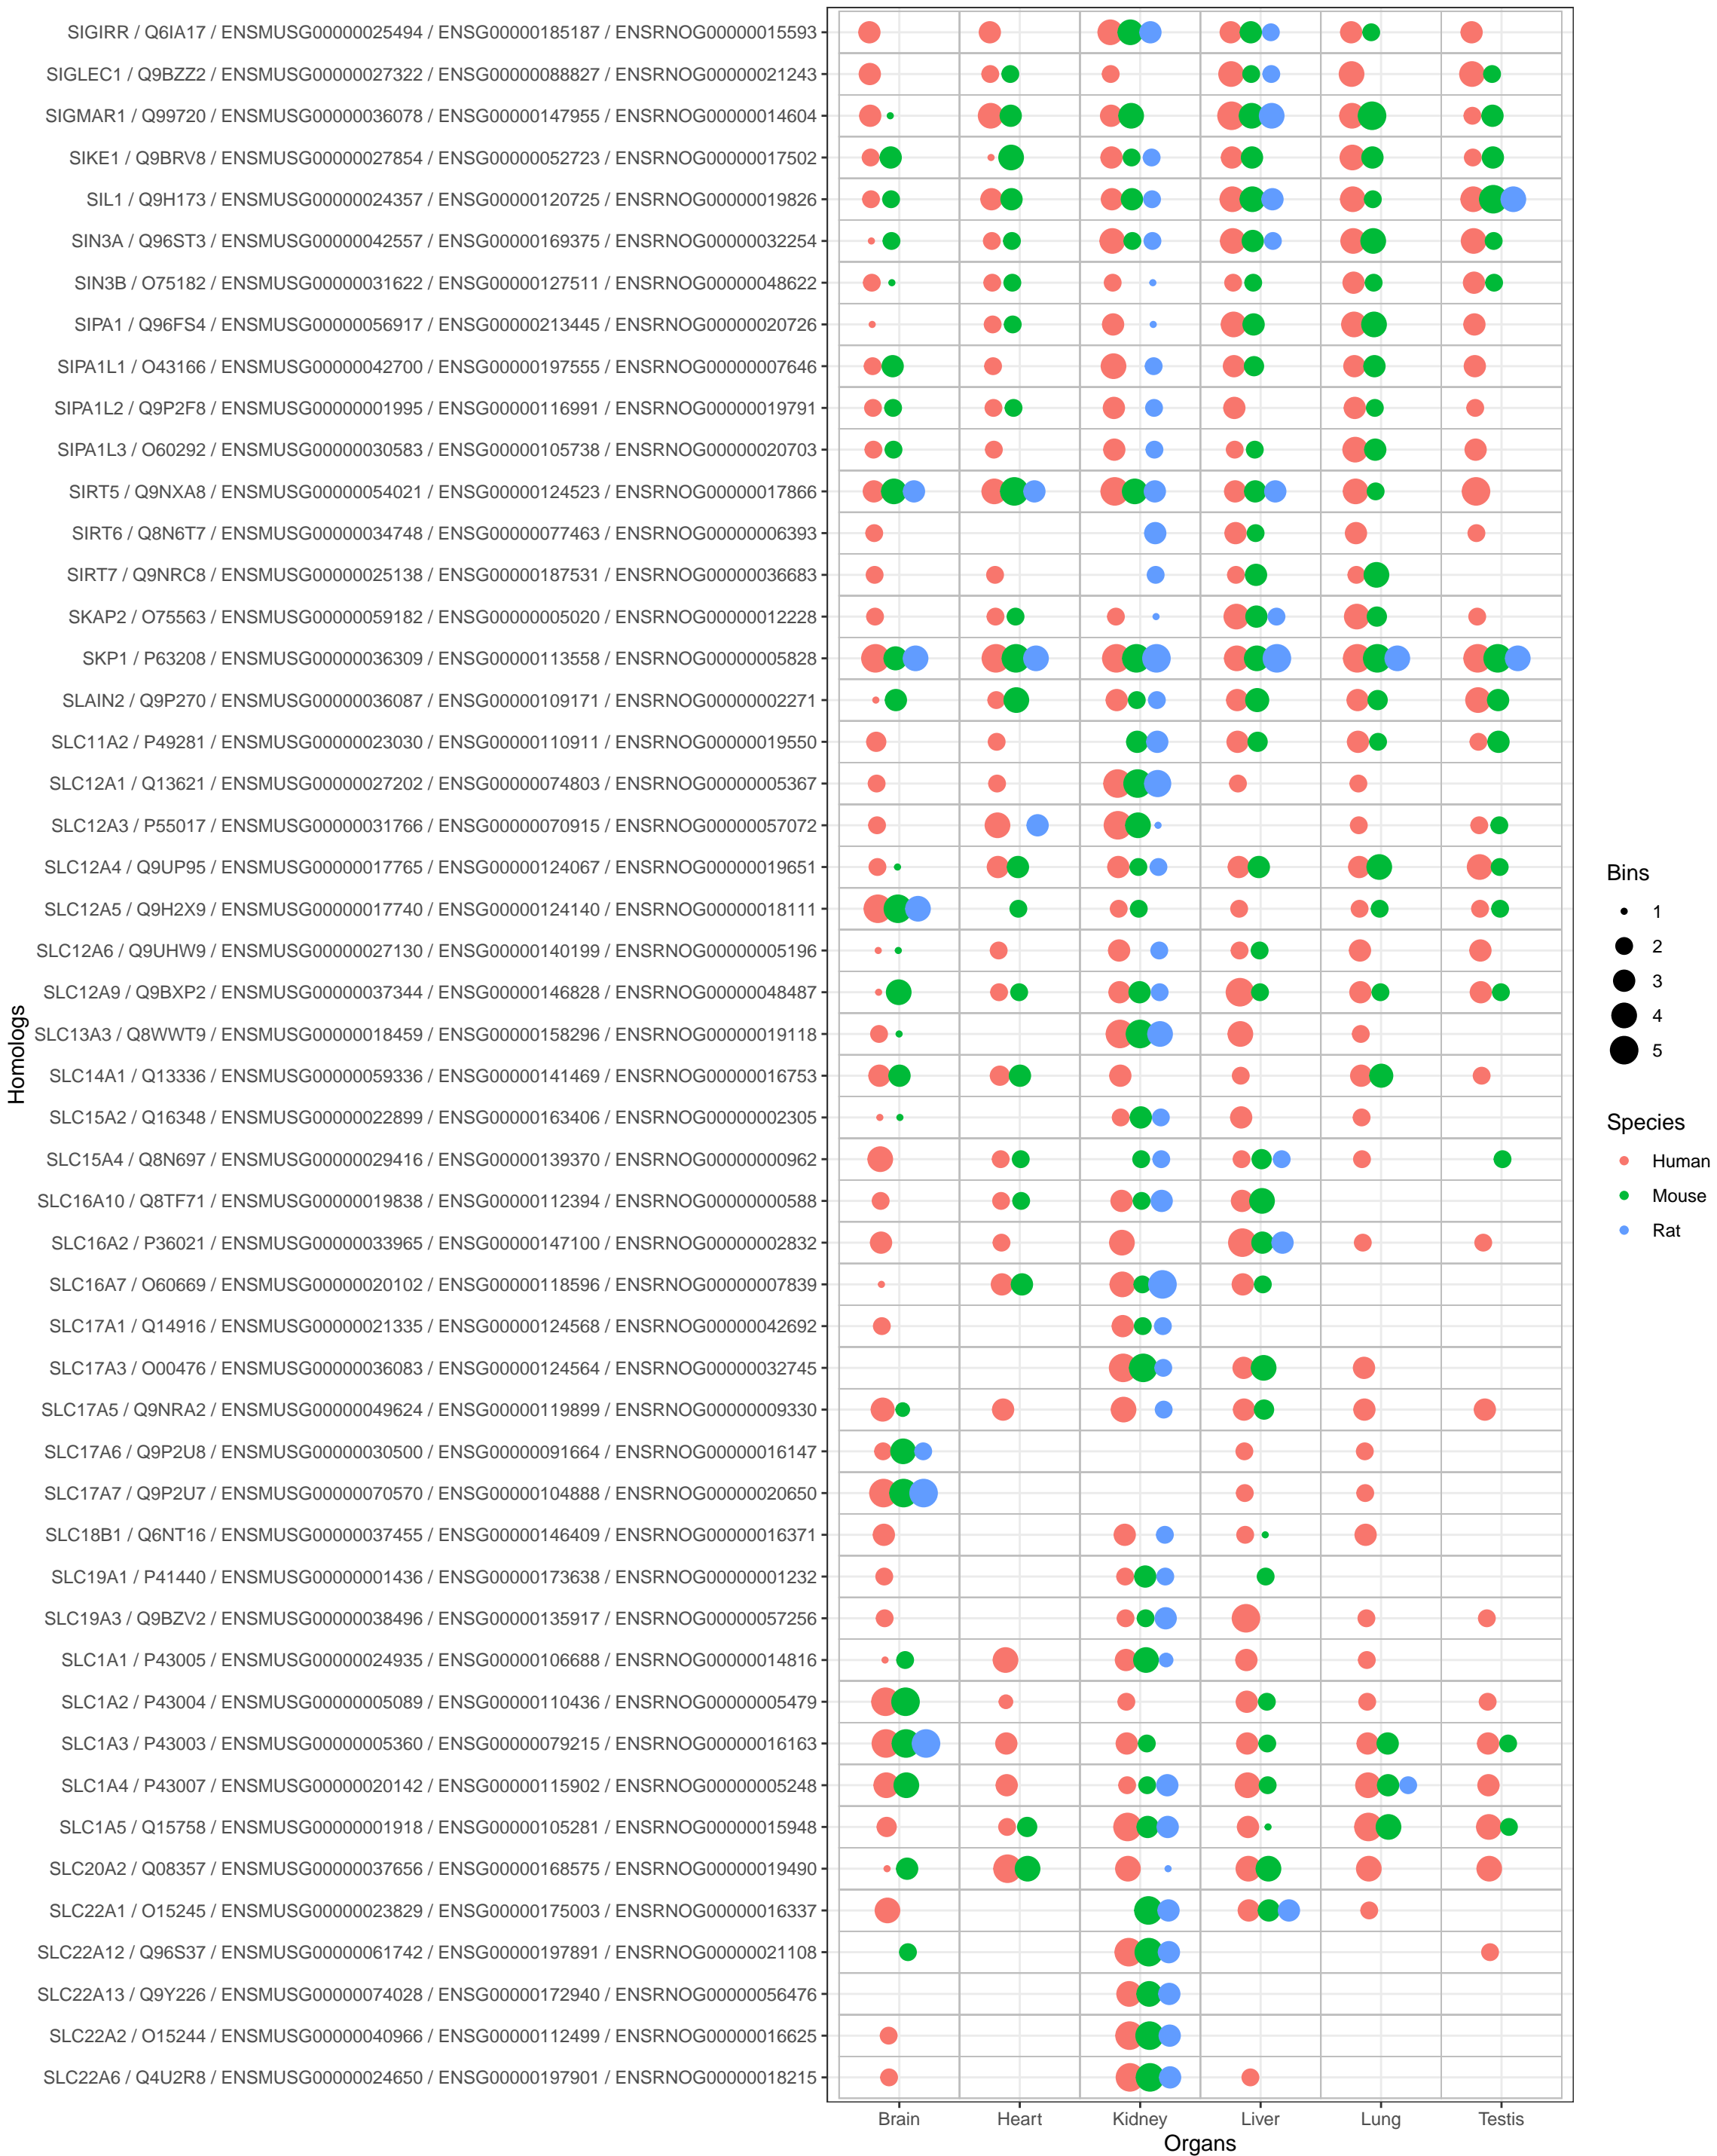

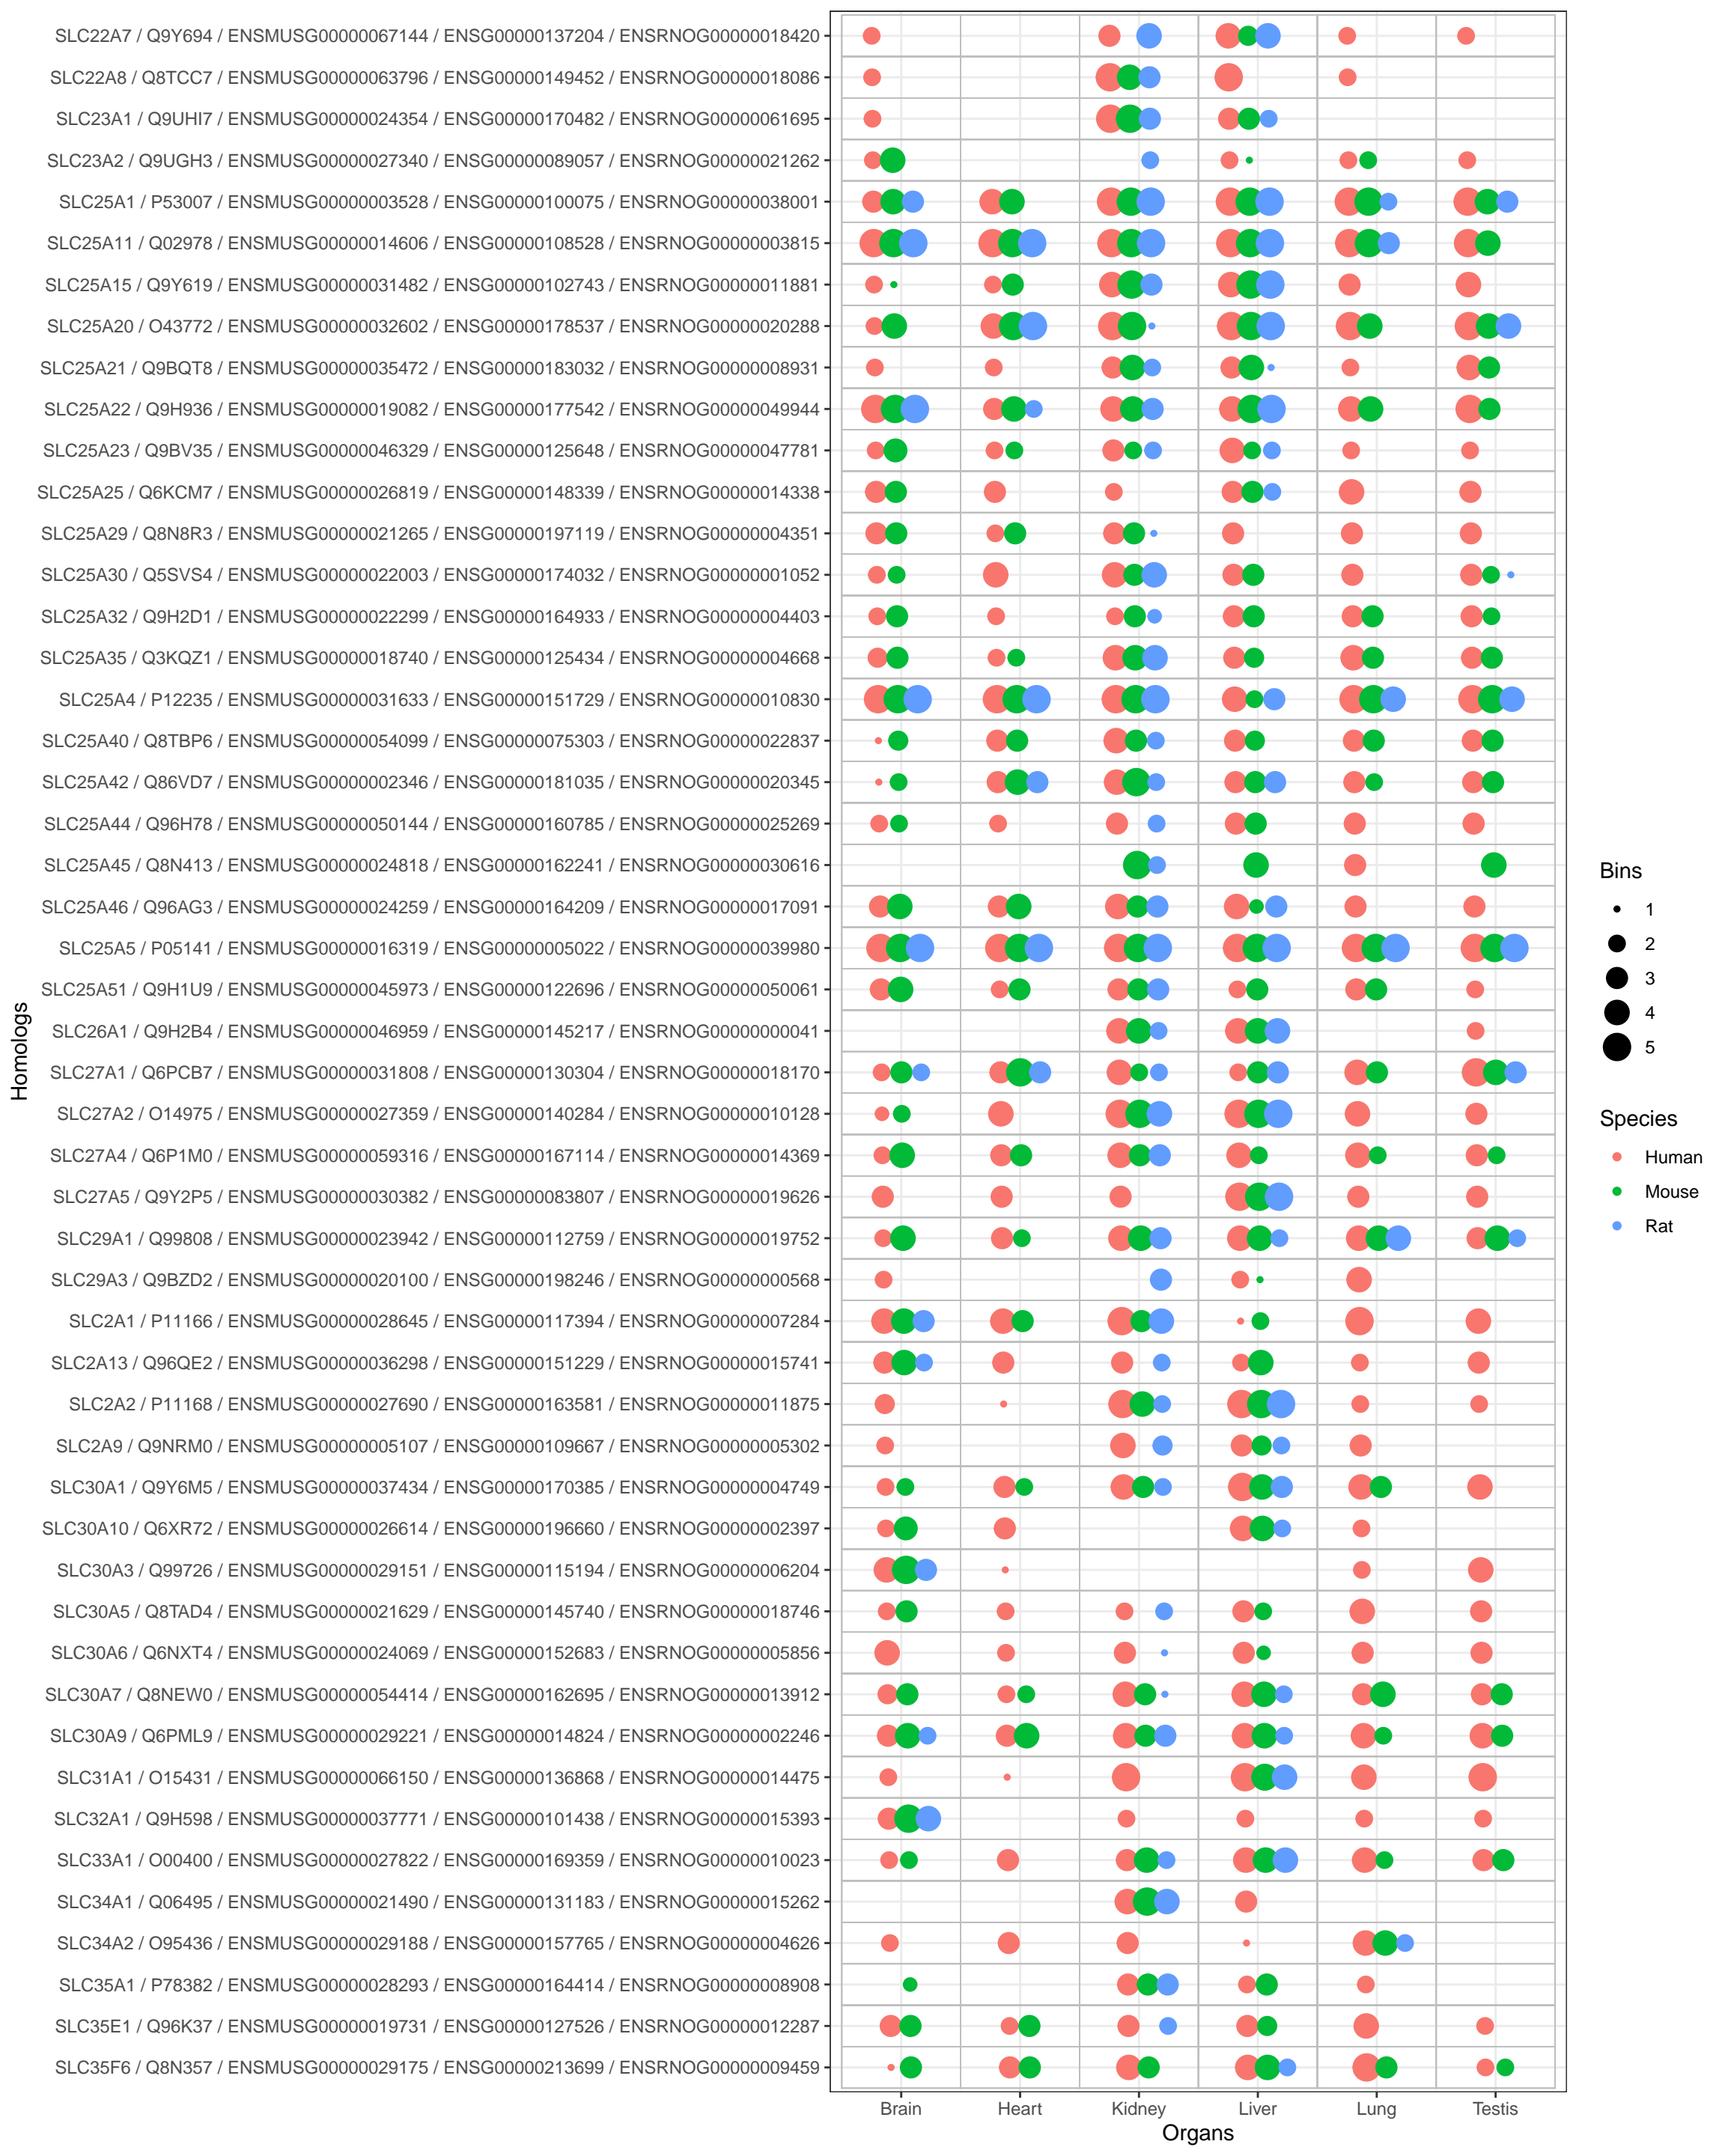

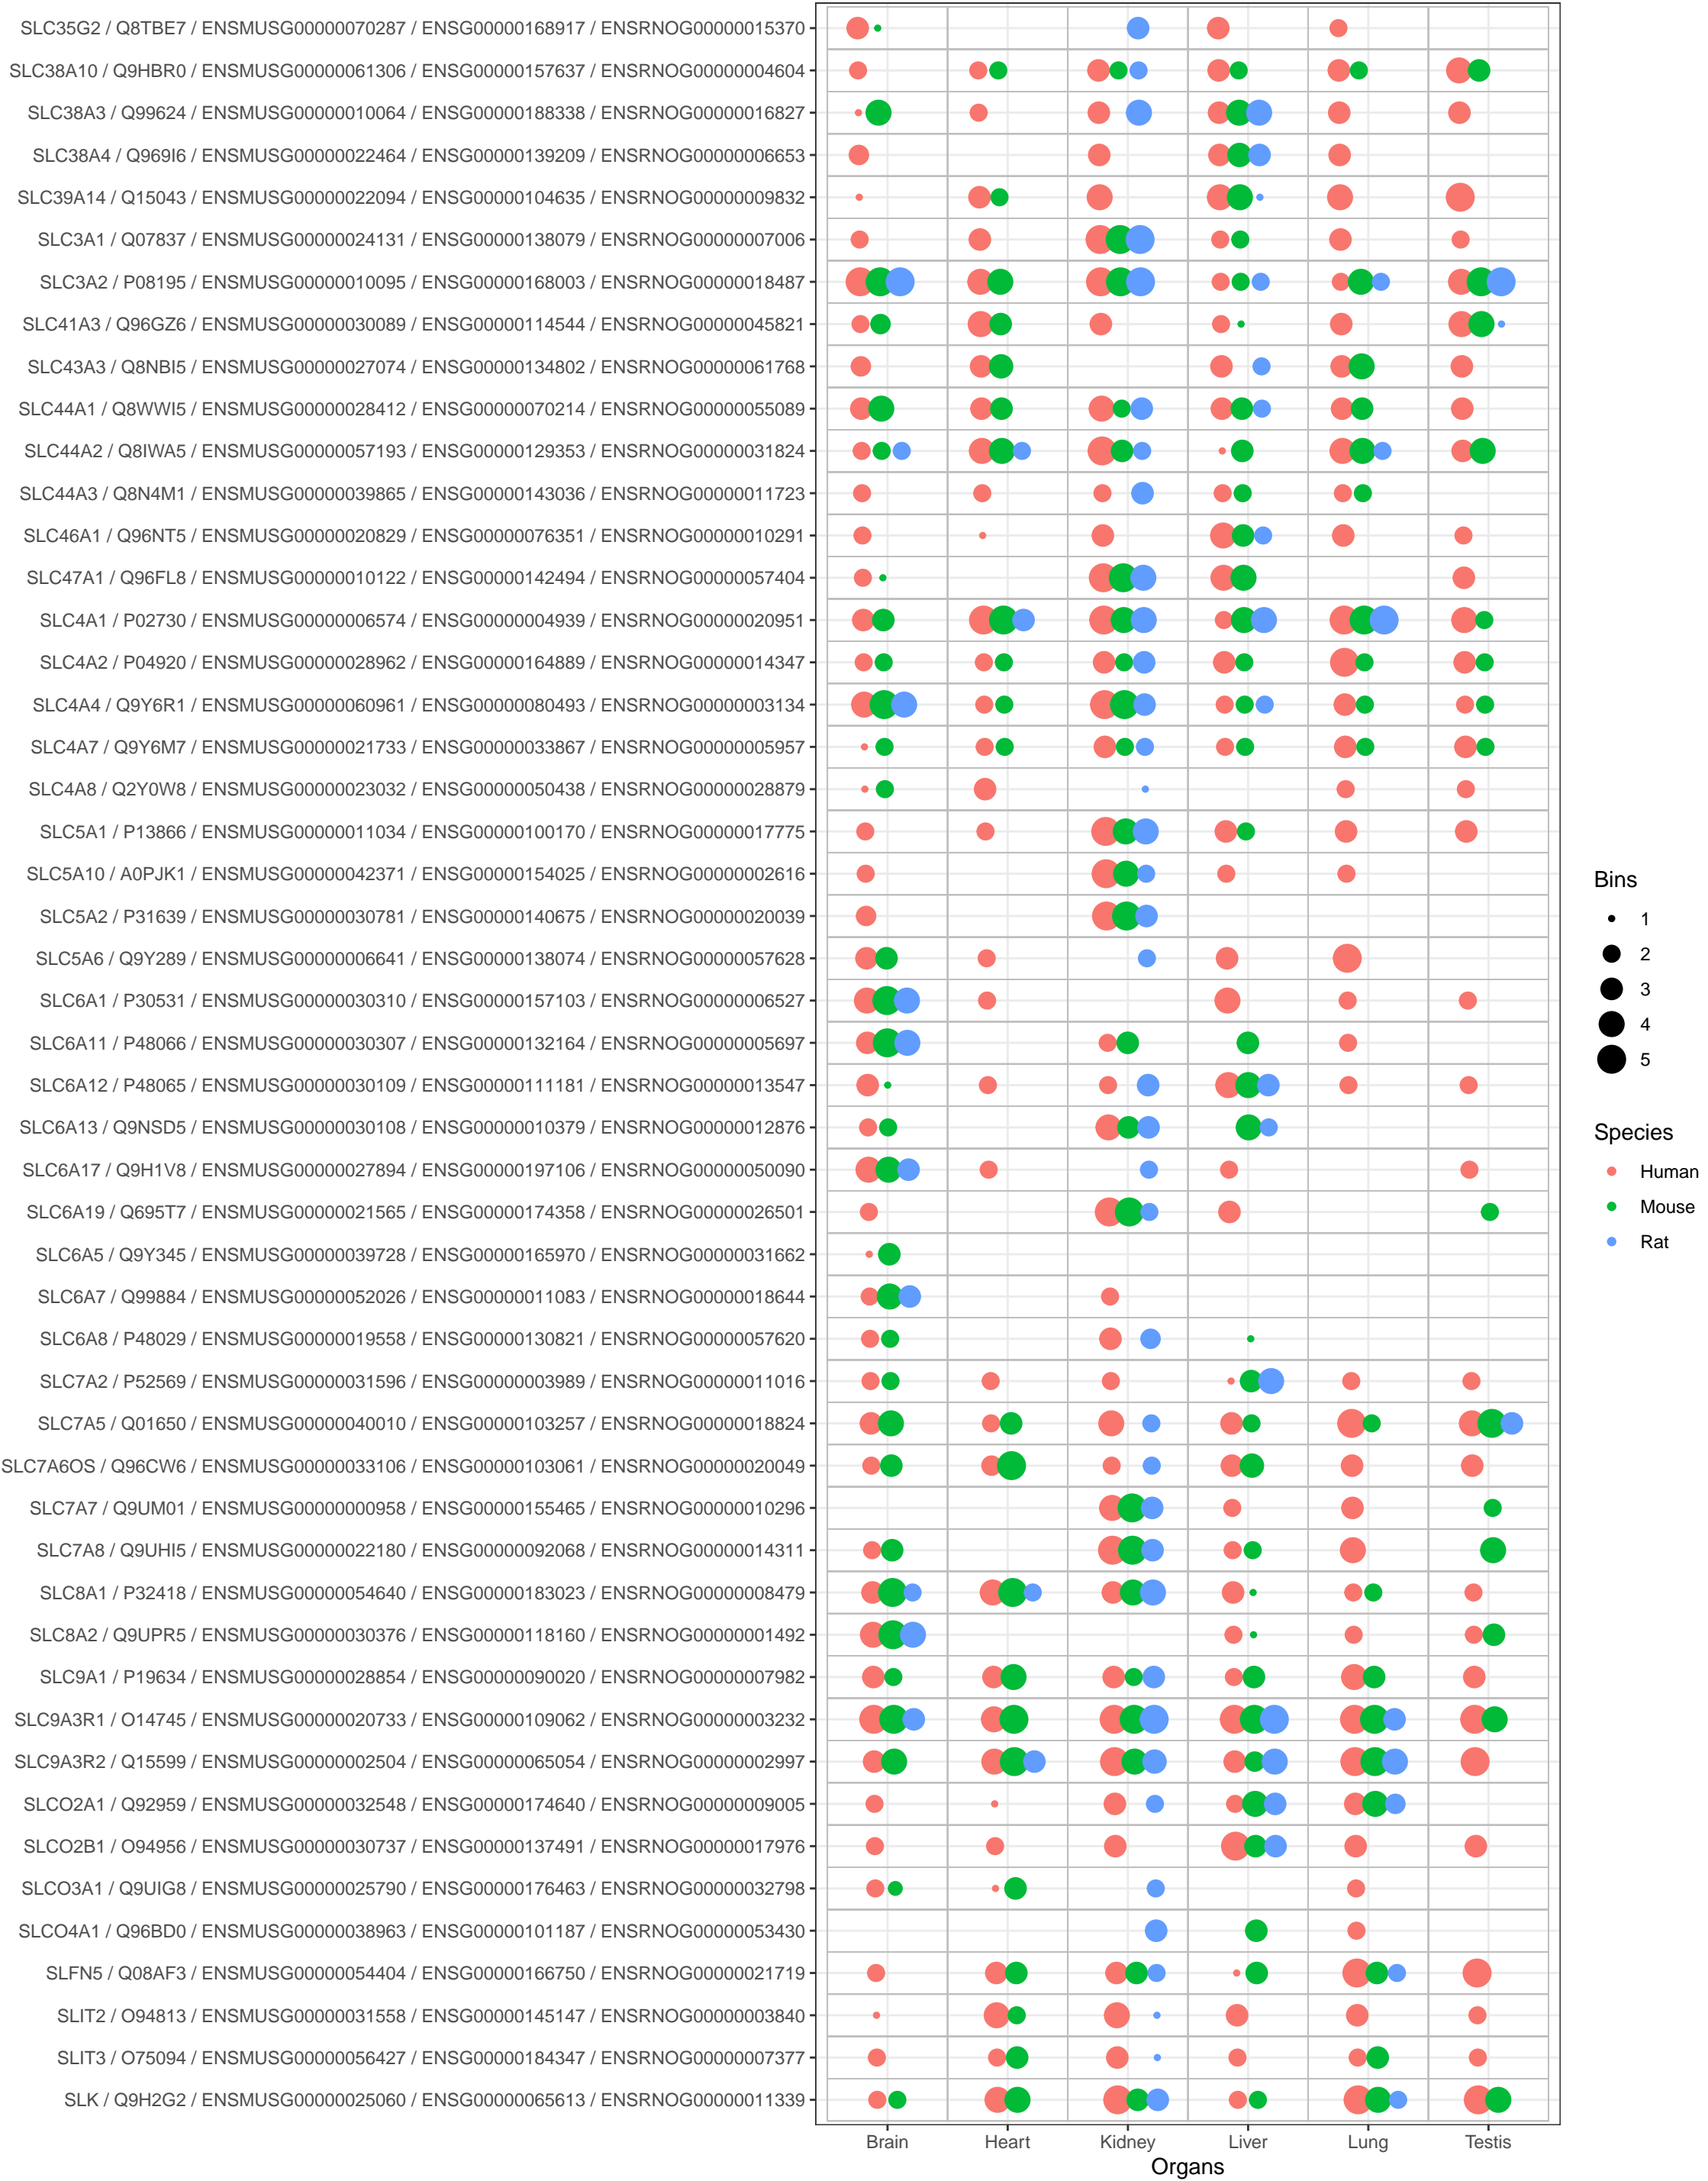

Homologs

SLMAP / Q14BN4 / ENSMUSG00000021870 / ENSG00000163681 / ENSRNOG00000011307  
SLU7 / O95391 / ENSMUSG00000020409 / ENSG00000164609 / ENSRNOG00000003822  
SMAD1 / Q15797 / ENSMUSG00000031681 / ENSG00000170365 / ENSRNOG00000018483  
SMAD2 / Q15796 / ENSMUSG00000024563 / ENSG00000175387 / ENSRNOG00000018140  
SMAD3 / P84022 / ENSMUSG00000032402 / ENSG00000166949 / ENSRNOG00000008620  
SMAD4 / Q13485 / ENSMUSG00000024515 / ENSG00000141646 / ENSRNOG00000051965  
SMAD5 / Q99717 / ENSMUSG00000021540 / ENSG00000113658 / ENSRNOG00000022870  
SMAP1 / Q8IYB5 / ENSMUSG00000026155 / ENSG00000112305 / ENSRNOG00000049127  
SMAP2 / Q8WU79 / ENSMUSG00000032870 / ENSG00000084070 / ENSRNOG00000011421  
SMARCA1 / P28370 / ENSMUSG00000031099 / ENSG00000102038 / ENSRNOG00000003762  
SMARCA2 / P51531 / ENSMUSG00000024921 / ENSG00000080503 / ENSRNOG00000011931  
SMARCA4 / P51532 / ENSMUSG00000032187 / ENSG00000127616 / ENSRNOG00000009271  
SMARCA5 / O60264 / ENSMUSG00000031715 / ENSG00000153147 / ENSRNOG00000018149  
SMARCAD1 / Q9H4L7 / ENSMUSG00000029920 / ENSG00000163104 / ENSRNOG00000006391  
SMARCC1 / Q92922 / ENSMUSG00000032481 / ENSG00000173473 / ENSRNOG00000020804  
SMARCD1 / Q96GM5 / ENSMUSG00000023018 / ENSG00000066117 / ENSRNOG00000061572  
SMARCD2 / Q92925 / ENSMUSG00000078619 / ENSG00000108604 / ENSRNOG00000010557  
SMARCD3 / Q6STE5 / ENSMUSG00000028949 / ENSG00000082014 / ENSRNOG00000010077  
SMARCE1 / Q969G3 / ENSMUSG00000037935 / ENSG00000073584 / ENSRNOG00000010676  
SMC1A / Q14683 / ENSMUSG00000041133 / ENSG00000072501 / ENSRNOG00000003139  
SMC1B / Q8NDV3 / ENSMUSG00000022432 / ENSG00000077935 / ENSRNOG00000032570  
SMC2 / O95347 / ENSMUSG00000028312 / ENSG00000136824 / ENSRNOG00000022325  
SMC3 / Q9UQE7 / ENSMUSG00000024974 / ENSG00000108055 / ENSRNOG00000014173  
SMC4 / Q9NTJ3 / ENSMUSG00000034349 / ENSG00000113810 / ENSRNOG00000010274  
SMG5 / Q9UPR3 / ENSMUSG00000001415 / ENSG00000198952 / ENSRNOG00000019590  
SMG8 / Q8ND04 / ENSMUSG00000020495 / ENSG00000167447 / ENSRNOG00000005769  
SMG9 / Q9H0W8 / ENSMUSG00000002210 / ENSG00000105771 / ENSRNOG00000019596  
SMIM1 / B2RUZ4 / ENSMUSG00000078350 / ENSG00000235169 / ENSRNOG00000043193  
SMIM12 / Q96EX1 / ENSMUSG00000042380 / ENSG00000163866 / ENSRNOG00000014352  
SMIM24 / O75264 / ENSMUSG00000078439 / ENSG00000095932 / ENSRNOG00000048878  
SMIM8 / Q96KF7 / ENSMUSG00000028295 / ENSG00000111850 / ENSRNOG00000023035  
SMNDC1 / O75940 / ENSMUSG00000025024 / ENSG00000119953 / ENSRNOG00000014833  
SMOC2 / Q9H3U7 / ENSMUSG00000023886 / ENSG00000112562 / ENSRNOG00000014166  
SMPD1 / P17405 / ENSMUSG00000037049 / ENSG00000166311 / ENSRNOG00000017977  
SMPD2 / O60906 / ENSMUSG00000019822 / ENSG00000135587 / ENSRNOG00000000306  
SMPDL3A / Q92484 / ENSMUSG00000019872 / ENSG00000172594 / ENSRNOG00000000815  
SMPDL3B / Q92485 / ENSMUSG00000028885 / ENSG00000130768 / ENSRNOG00000042326  
SMPX / Q9UHP9 / ENSMUSG00000041476 / ENSG00000091482 / ENSRNOG00000007495  
SMS / P52788 / ENSMUSG00000071708 / ENSG00000102172 / ENSRNOG00000007688  
SMTN / P53814 / ENSMUSG00000020439 / ENSG00000183963 / ENSRNOG00000019451  
SMTNL2 / Q2TAL5 / ENSMUSG00000045667 / ENSG00000188176 / ENSRNOG00000015157  
SMU1 / Q2TAY7 / ENSMUSG00000028409 / ENSG00000122692 / ENSRNOG00000007671  
SMYD1 / Q8NB12 / ENSMUSG00000055027 / ENSG00000115593 / ENSRNOG00000006776  
SMYD2 / Q9NRG4 / ENSMUSG00000026603 / ENSG00000143499 / ENSRNOG00000003583  
SMYD5 / Q6GMV2 / ENSMUSG00000033706 / ENSG00000135632 / ENSRNOG00000015589  
SNAP25 / P60880 / ENSMUSG00000027273 / ENSG00000132639 / ENSRNOG00000006037  
SNAP29 / O95721 / ENSMUSG00000022765 / ENSG00000099940 / ENSRNOG0000001867  
SNAP91 / O60641 / ENSMUSG00000033419 / ENSG00000065609 / ENSRNOG00000023861  
SNAPIN / O95295 / ENSMUSG00000001018 / ENSG00000143553 / ENSRNOG00000013356  
SNCA / P37840 / ENSMUSG00000025889 / ENSG00000145335 / ENSRNOG00000008656

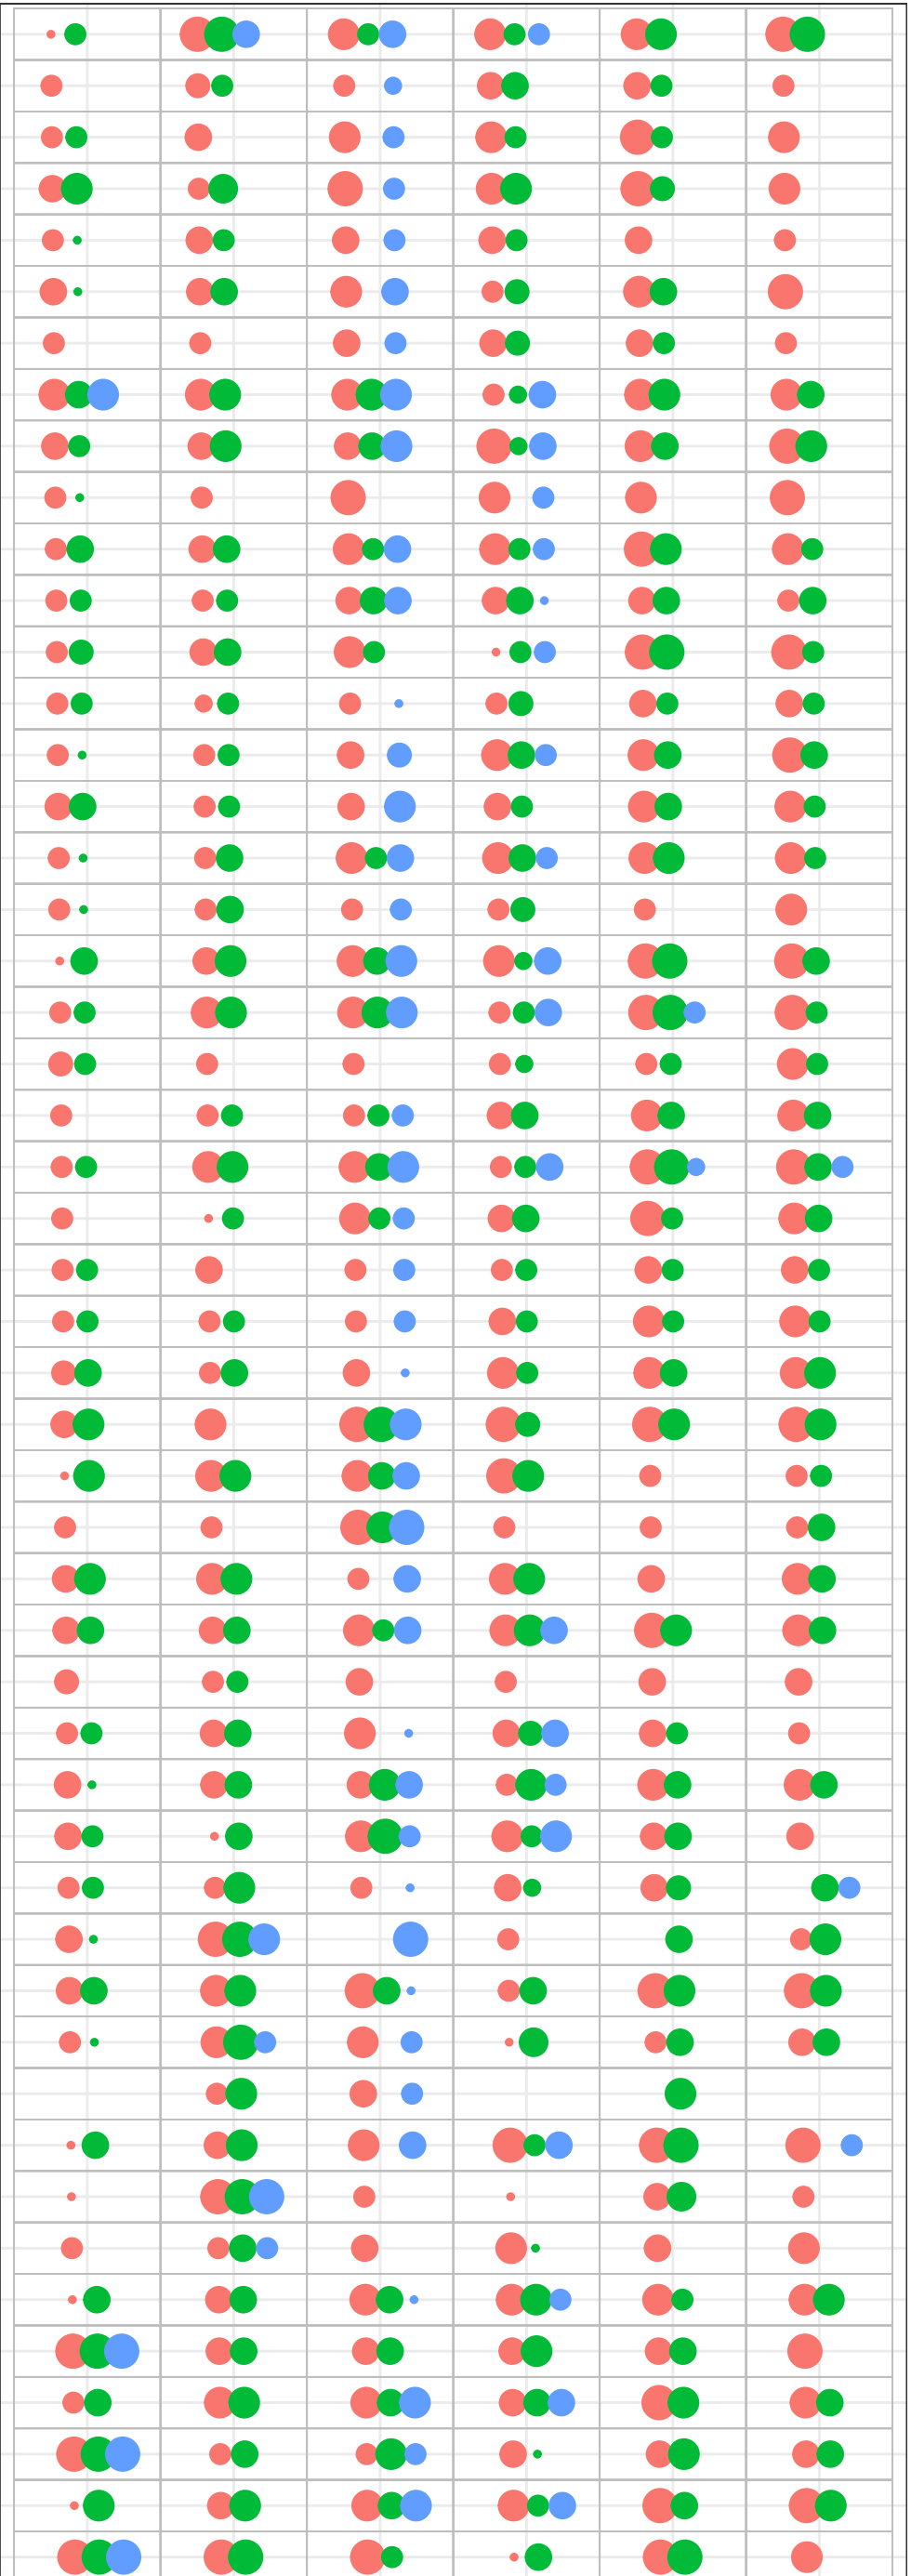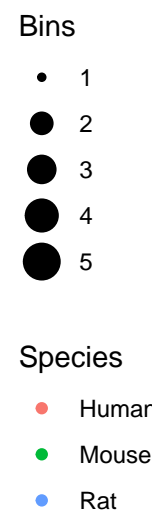

Organs



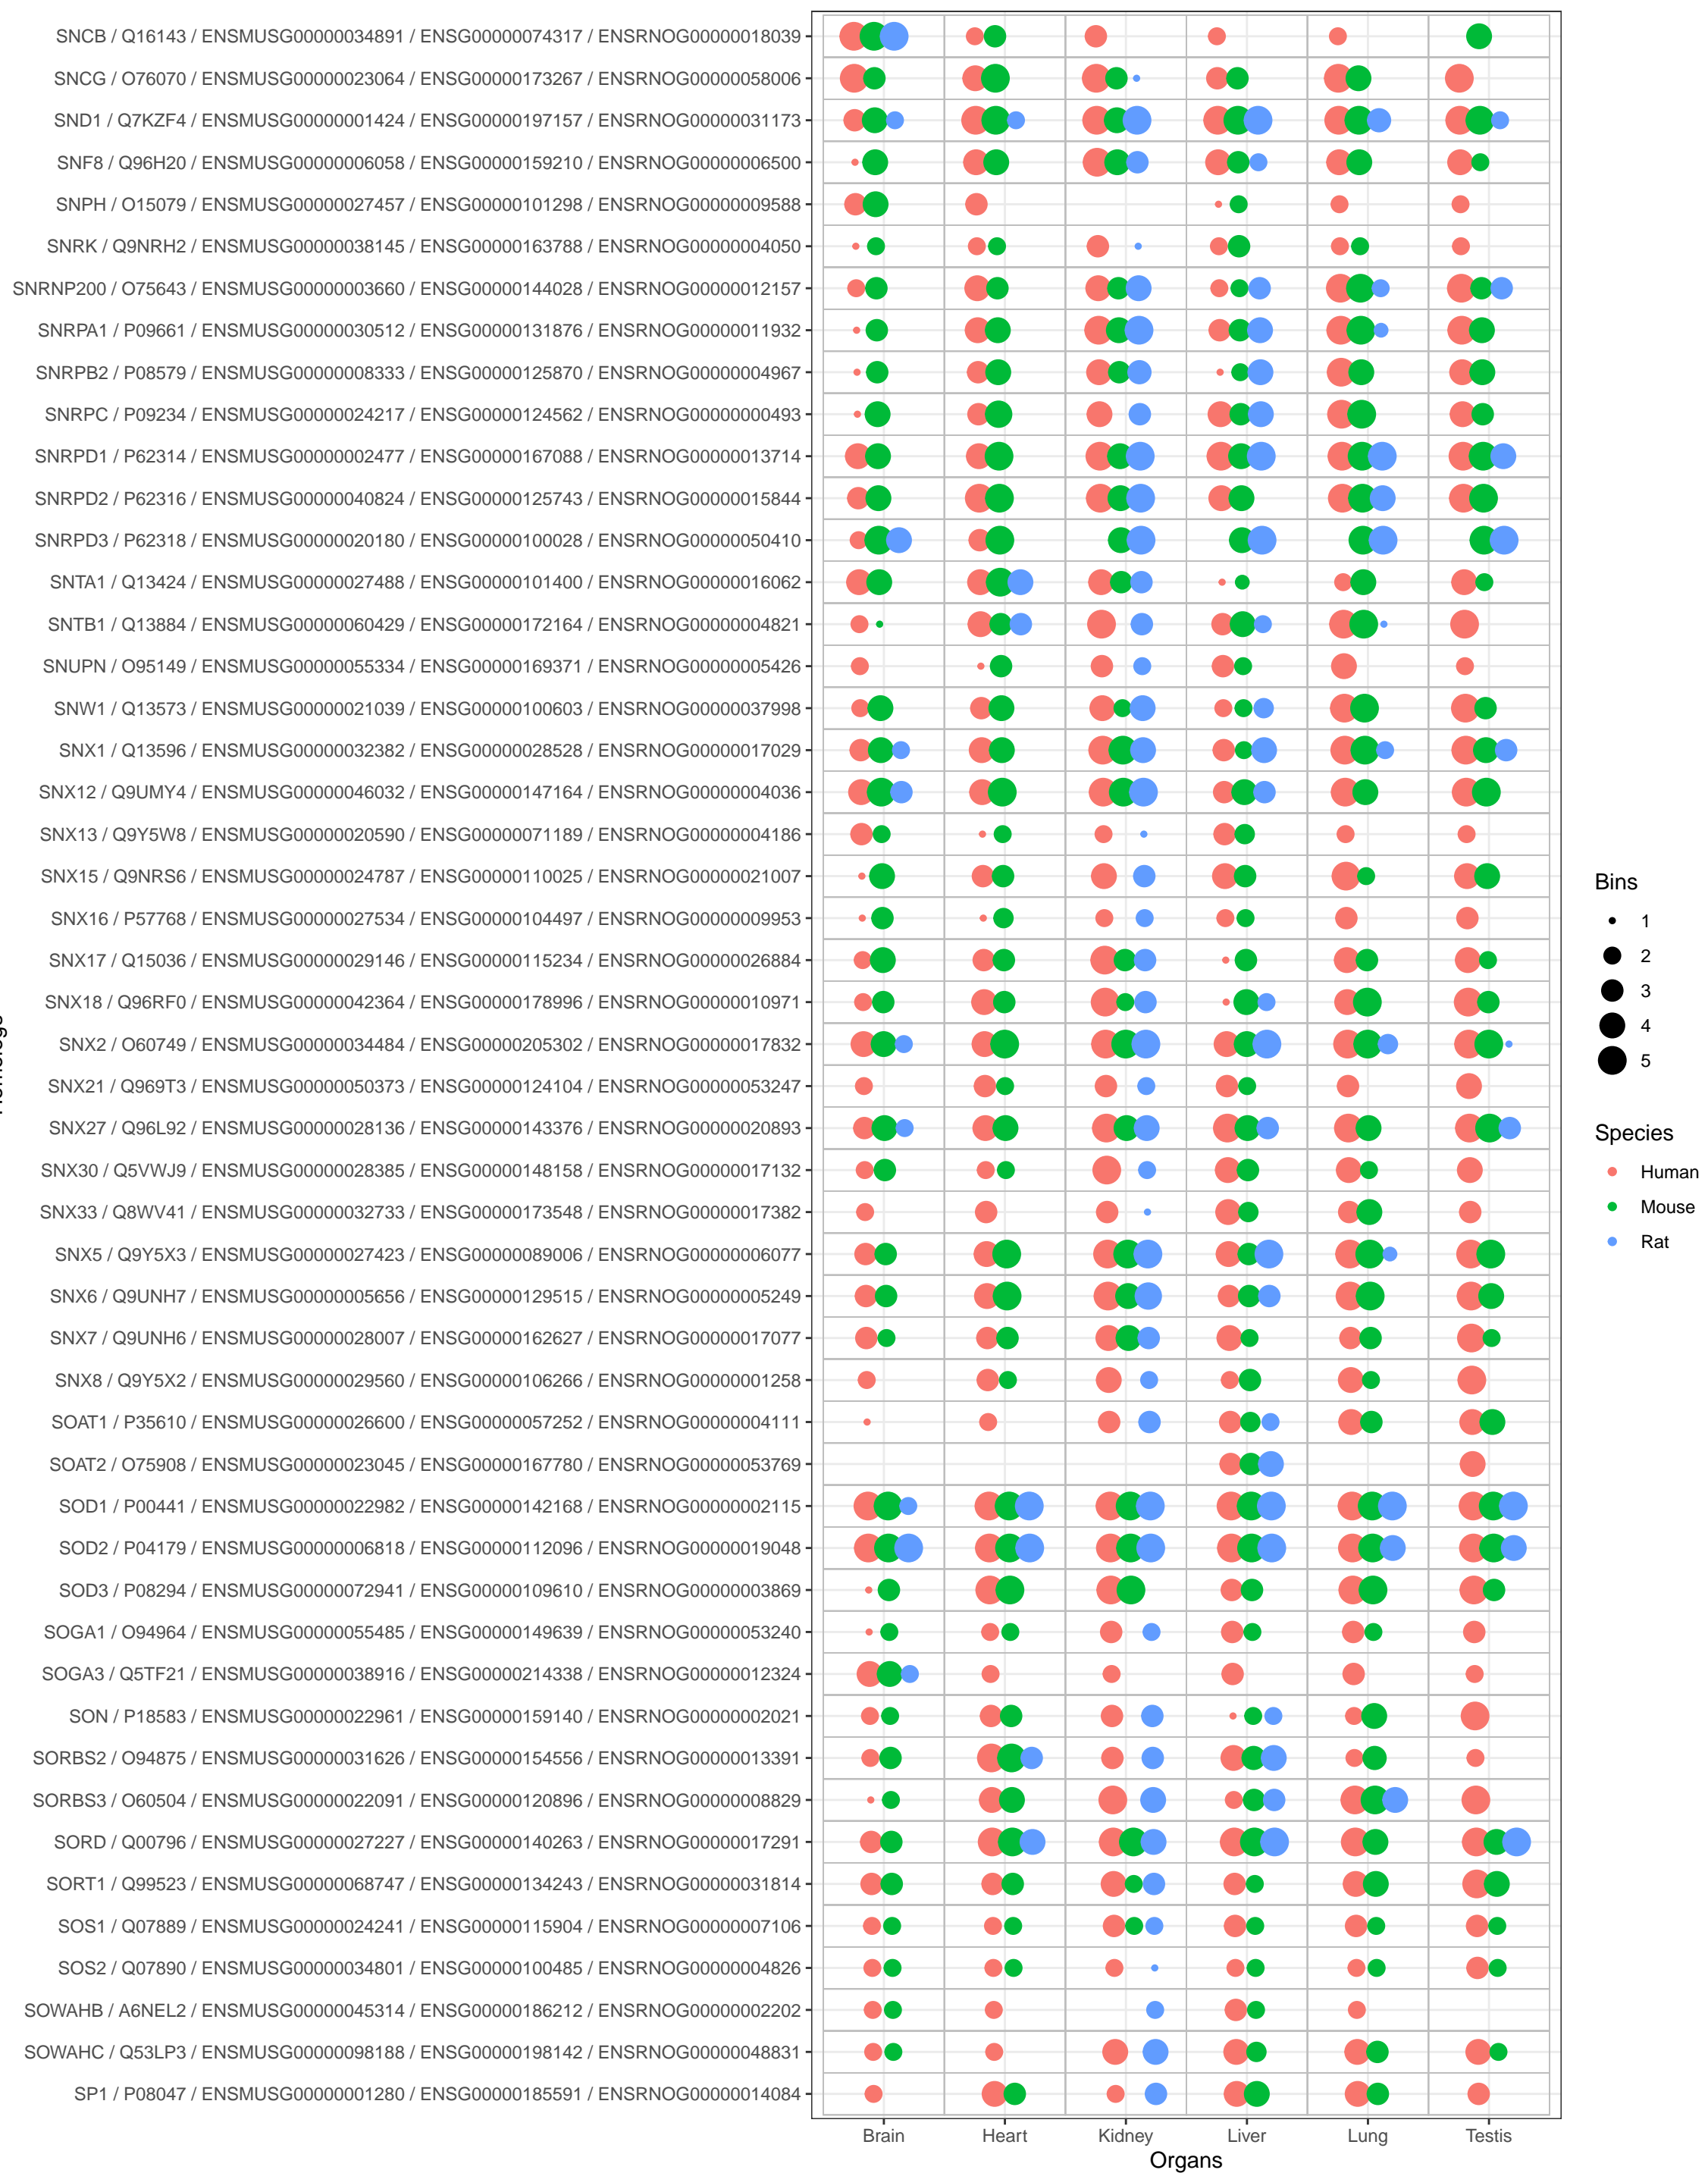

Homologs

SP110 / Q9HB58 / ENSMUSG00000070034 / ENSG00000135899 / ENSRNOG00000033747  
SP2 / Q02086 / ENSMUSG00000018678 / ENSG00000167182 / ENSRNOG00000010492  
SPA17 / Q15506 / ENSMUSG00000001948 / ENSG00000064199 / ENSRNOG00000010934  
SPACA9 / Q96E40 / ENSMUSG00000026809 / ENSG00000165698 / ENSRNOG00000012697  
SPAG1 / Q07617 / ENSMUSG00000037617 / ENSG00000104450 / ENSRNOG00000010078  
SPAG7 / O75391 / ENSMUSG00000018287 / ENSG00000091640 / ENSRNOG00000004246  
SPAG9 / O60271 / ENSMUSG00000020859 / ENSG00000008294 / ENSRNOG00000002749  
SPARC / P09486 / ENSMUSG00000018593 / ENSG00000113140 / ENSRNOG00000012840  
SPARCL1 / Q14515 / ENSMUSG00000029309 / ENSG00000152583 / ENSRNOG00000015093  
SPAST / Q9UBP0 / ENSMUSG00000024068 / ENSG00000021574 / ENSRNOG00000027136  
SPATA18 / Q8TC71 / ENSMUSG00000029155 / ENSG00000163071 / ENSRNOG00000002120  
SPATA20 / Q8TB22 / ENSMUSG00000020867 / ENSG00000006282 / ENSRNOG00000003273  
SPATA5 / Q8NB90 / ENSMUSG00000027722 / ENSG00000145375 / ENSRNOG00000017462  
SPATA6 / Q9NWH7 / ENSMUSG00000034401 / ENSG00000132122 / ENSRNOG00000007568  
SPATS2 / Q86XZ4 / ENSMUSG00000051934 / ENSG00000123352 / ENSRNOG00000052307  
SPATS2L / Q9NUQ6 / ENSMUSG00000038305 / ENSG00000196141 / ENSRNOG00000016012  
SPCS2 / Q15005 / ENSMUSG00000035227 / ENSG00000118363 / ENSRNOG00000018164  
SPECC1 / Q5M775 / ENSMUSG00000042331 / ENSG00000128487 / ENSRNOG00000002903  
SPEG / Q15772 / ENSMUSG00000026207 / ENSG00000072195 / ENSRNOG00000019850  
SPESP1 / Q6UW49 / ENSMUSG00000046846 / ENSG00000258484 / ENSRNOG00000025359  
SPG11 / Q96J17 / ENSMUSG00000033396 / ENSG00000104133 / ENSRNOG00000021954  
SPG21 / Q9NZD8 / ENSMUSG00000032388 / ENSG00000090487 / ENSRNOG00000015019  
SPG7 / Q9UQ90 / ENSMUSG00000000738 / ENSG00000197912 / ENSRNOG00000015150  
SPHK2 / Q9NRA0 / ENSMUSG00000057342 / ENSG00000063176 / ENSRNOG00000021032  
SPINT2 / O43291 / ENSMUSG00000074227 / ENSG00000167642 / ENSRNOG00000020636  
SPIRE1 / Q08AE8 / ENSMUSG00000024533 / ENSG00000134278 / ENSRNOG00000025324  
SPNS1 / Q9H2V7 / ENSMUSG00000030741 / ENSG00000169682 / ENSRNOG00000017621  
SPON1 / Q9HCB6 / ENSMUSG00000038156 / ENSG00000262655 / ENSRNOG00000058003  
SPOUT1 / Q5T280 / ENSMUSG00000039660 / ENSG00000198917 / ENSRNOG00000025711  
SPP1 / P10451 / ENSMUSG00000029304 / ENSG00000118785 / ENSRNOG00000043451  
SPP2 / Q13103 / ENSMUSG00000026295 / ENSG00000072080 / ENSRNOG00000053244  
SPPL2A / Q8TCT8 / ENSMUSG00000027366 / ENSG00000138600 / ENSRNOG00000011652  
SPR / P35270 / ENSMUSG00000033735 / ENSG00000116096 / ENSRNOG00000015455  
SPRY2 / O43597 / ENSMUSG00000022114 / ENSG00000136158 / ENSRNOG00000010058  
SPRYD7 / Q5W111 / ENSMUSG00000021930 / ENSG00000123178 / ENSRNOG00000015095  
SPTA1 / P02549 / ENSMUSG00000026532 / ENSG00000163554 / ENSRNOG00000003537  
SPTAN1 / Q13813 / ENSMUSG00000057738 / ENSG00000197694 / ENSRNOG00000015396  
SPTB / P11277 / ENSMUSG00000021061 / ENSG00000070182 / ENSRNOG00000006911  
SPTBN2 / O15020 / ENSMUSG00000067889 / ENSG00000173898 / ENSRNOG00000058842  
SPTBN4 / Q9H254 / ENSMUSG00000011751 / ENSG00000160460 / ENSRNOG00000055371  
SPTLC1 / O15269 / ENSMUSG00000021468 / ENSG00000090054 / ENSRNOG00000010882  
SPTLC2 / O15270 / ENSMUSG00000021036 / ENSG00000100596 / ENSRNOG00000012210  
SQLE / Q14534 / ENSMUSG00000022351 / ENSG00000104549 / ENSRNOG00000009550  
SQOR / Q9Y6N5 / ENSMUSG00000005803 / ENSG00000137767 / ENSRNOG00000000172  
SRA1 / Q9HD15 / ENSMUSG00000006050 / ENSG00000213523 / ENSRNOG00000018089  
SRBD1 / Q8N5C6 / ENSMUSG00000024135 / ENSG00000068784 / ENSRNOG00000014720  
SRC / P12931 / ENSMUSG00000027646 / ENSG00000197122 / ENSRNOG00000009495  
SRD5A1 / P18405 / ENSMUSG00000021594 / ENSG00000145545 / ENSRNOG00000017601  
SRGAP1 / Q7Z6B7 / ENSMUSG00000020121 / ENSG00000196935 / ENSRNOG00000004603  
SRGAP3 / O43295 / ENSMUSG00000030257 / ENSG00000196220 / ENSRNOG00000006509

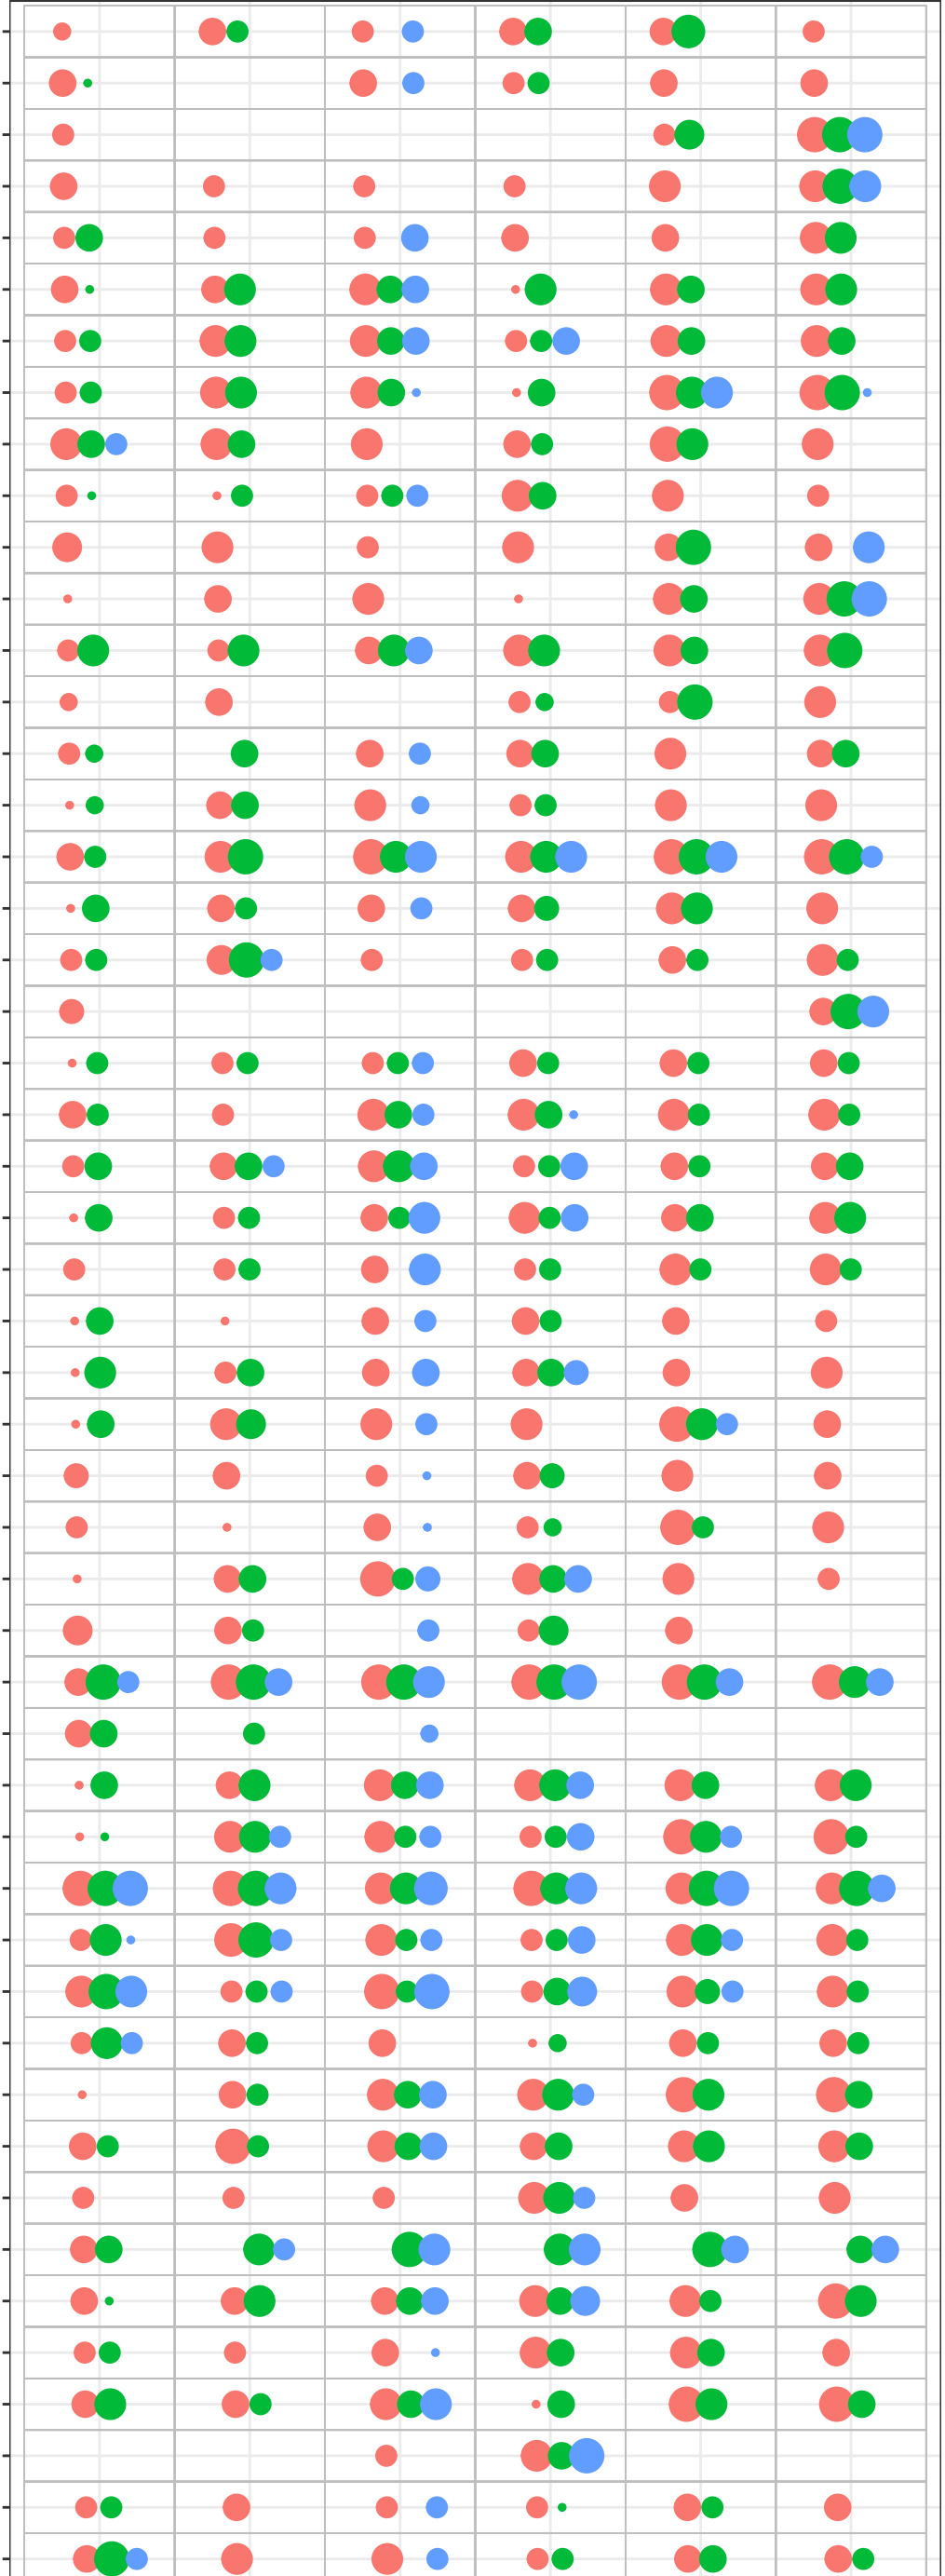

Bins



Species



Brain Heart Kidney Liver Lung Testis  
Organs



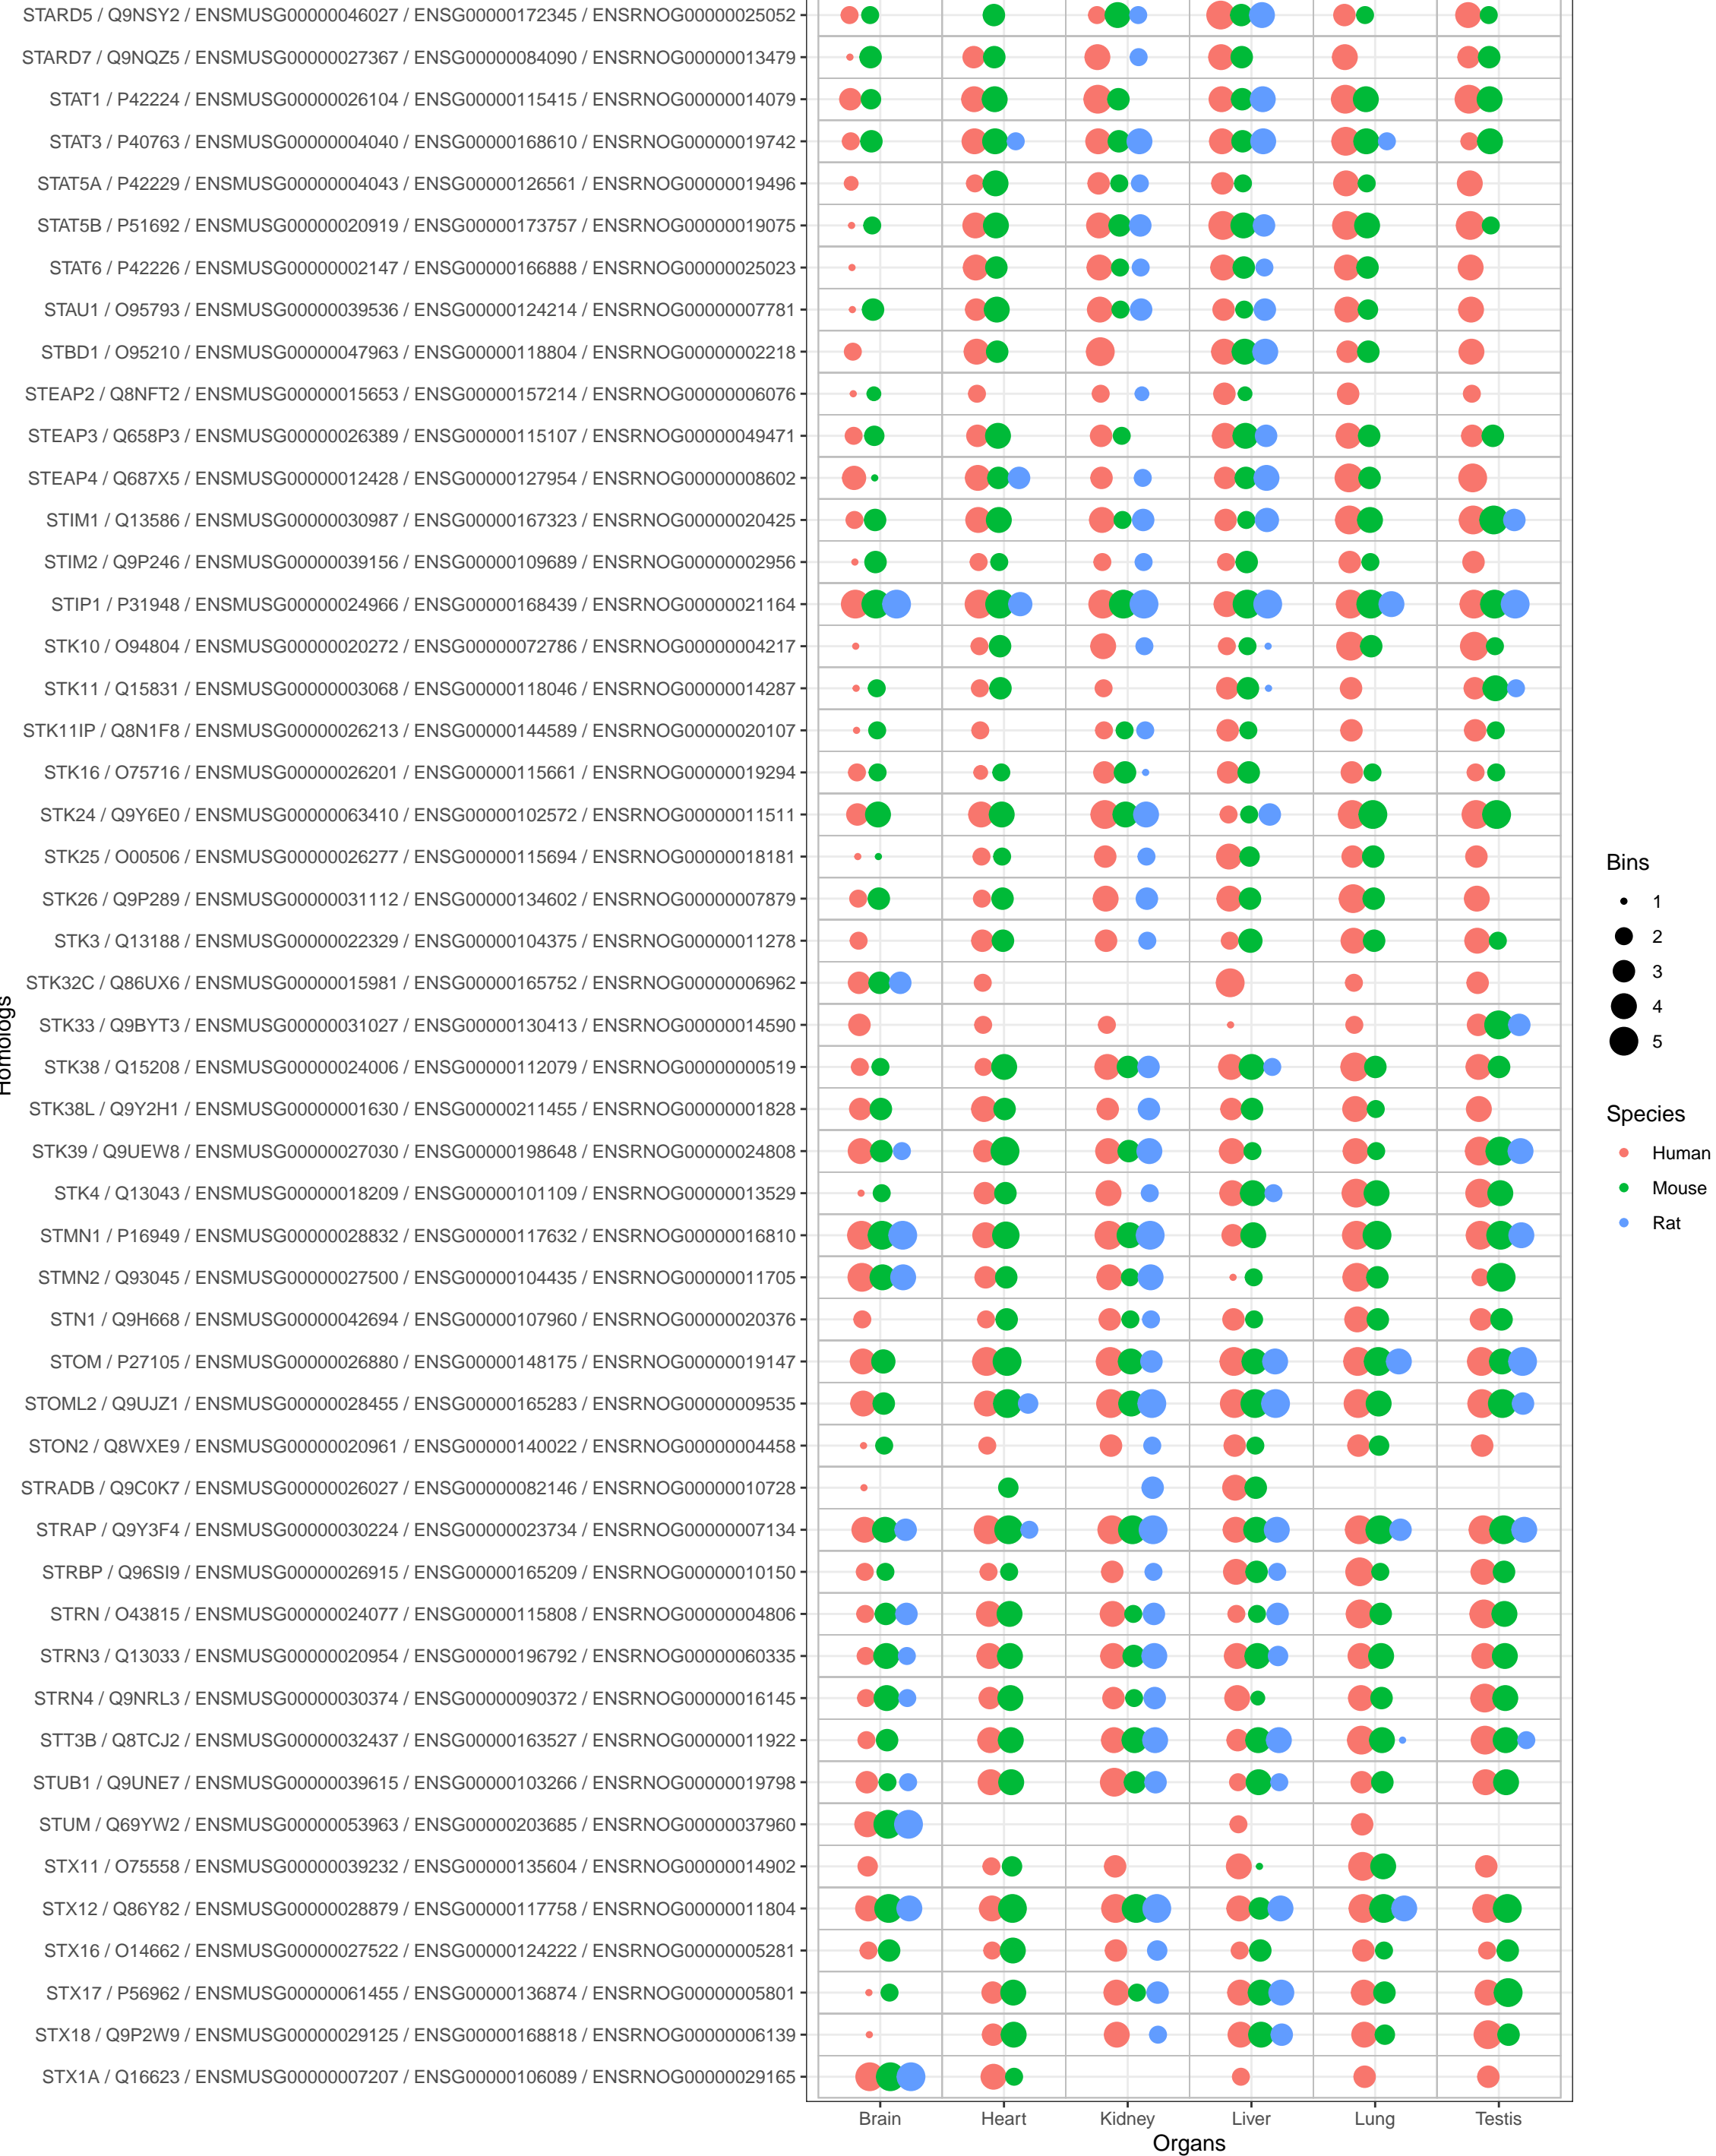

Homologs

STX1B / P61266 / ENSMUSG00000030806 / ENSG00000099365 / ENSRNOG00000019193  
STX2 / P32856 / ENSMUSG00000029428 / ENSG00000111450 / ENSRNOG00000000936  
STX3 / Q13277 / ENSMUSG00000041488 / ENSG00000166900 / ENSRNOG00000021013  
STX4 / Q12846 / ENSMUSG00000030805 / ENSG00000103496 / ENSRNOG00000019302  
STX5 / Q13190 / ENSMUSG00000010110 / ENSG00000162236 / ENSRNOG00000018847  
STX6 / O43752 / ENSMUSG00000026470 / ENSG00000135823 / ENSRNOG00000003402  
STX7 / O15400 / ENSMUSG00000019998 / ENSG00000079950 / ENSRNOG00000015670  
STX8 / Q9UNK0 / ENSMUSG00000020903 / ENSG00000170310 / ENSRNOG00000003849  
STXBP1 / P61764 / ENSMUSG00000026797 / ENSG00000136854 / ENSRNOG00000015420  
STXBP2 / Q15833 / ENSMUSG00000004626 / ENSG00000076944 / ENSRNOG00000000994  
STXBP3 / O00186 / ENSMUSG00000027882 / ENSG00000116266 / ENSRNOG00000020392  
STXBP4 / Q6ZWJ1 / ENSMUSG00000020546 / ENSG00000166263 / ENSRNOG00000032768  
STXBP5 / Q5T5C0 / ENSMUSG00000019790 / ENSG00000164506 / ENSRNOG00000013351  
STXBP6 / Q8NFX7 / ENSMUSG00000046314 / ENSG00000168952 / ENSRNOG00000004198  
SUB1 / P53999 / ENSMUSG00000022205 / ENSG00000113387 / ENSRNOG00000050563  
SUCLA2 / Q9P2R7 / ENSMUSG00000022110 / ENSG00000136143 / ENSRNOG00000017481  
SUCLG1 / P53597 / ENSMUSG00000052738 / ENSG00000163541 / ENSRNOG00000005587  
SUDS3 / Q9H7L9 / ENSMUSG00000066900 / ENSG00000111707 / ENSRNOG00000001139  
SUFU / Q9UMX1 / ENSMUSG00000025231 / ENSG00000107882 / ENSRNOG00000019807  
SUGP1 / Q8IWZ8 / ENSMUSG00000011306 / ENSG00000105705 / ENSRNOG00000052111  
SUGP2 / Q8IX01 / ENSMUSG00000036054 / ENSG00000064607 / ENSRNOG00000020269  
SUGT1 / Q9Y2Z0 / ENSMUSG00000022024 / ENSG00000165416 / ENSRNOG00000012594  
SULT1B1 / O43704 / ENSMUSG00000029269 / ENSG00000173597 / ENSRNOG00000001967  
SULT2B1 / O00204 / ENSMUSG00000003271 / ENSG00000088002 / ENSRNOG00000021046  
SULT4A1 / Q9BR01 / ENSMUSG00000018865 / ENSG00000130540 / ENSRNOG00000046975  
SUMF1 / Q8NBK3 / ENSMUSG00000030101 / ENSG00000144455 / ENSRNOG00000006813  
SUMF2 / Q8NBJ7 / ENSMUSG00000025538 / ENSG00000129103 / ENSRNOG00000000922  
SUN1 / O94901 / ENSMUSG00000036817 / ENSG00000164828 / ENSRNOG00000001299  
SUN2 / Q9UH99 / ENSMUSG00000042524 / ENSG00000100242 / ENSRNOG00000015177  
SUPT16H / Q9Y5B9 / ENSMUSG00000035726 / ENSG00000092201 / ENSRNOG00000011953  
SUPT6H / Q7KZ85 / ENSMUSG00000002052 / ENSG00000109111 / ENSRNOG00000012240  
SUPV3L1 / Q8IYB8 / ENSMUSG00000020079 / ENSG00000156502 / ENSRNOG00000000392  
SUSD2 / Q9UGT4 / ENSMUSG00000006342 / ENSG00000099994 / ENSRNOG00000033389  
SV2A / Q7L0J3 / ENSMUSG00000038486 / ENSG00000159164 / ENSRNOG00000021182  
SVIL / O95425 / ENSMUSG00000024236 / ENSG00000197321 / ENSRNOG00000018110  
SWAP70 / Q9UH65 / ENSMUSG00000031015 / ENSG00000133789 / ENSRNOG000000009910  
SYAP1 / Q96A49 / ENSMUSG00000031357 / ENSG00000169895 / ENSRNOG00000004304  
SYF2 / O95926 / ENSMUSG00000028821 / ENSG00000117614 / ENSRNOG00000060597  
SYK / P43405 / ENSMUSG00000021457 / ENSG00000165025 / ENSRNOG00000012160  
SYMPK / Q92797 / ENSMUSG00000023118 / ENSG00000125755 / ENSRNOG00000014353  
SYN1 / P17600 / ENSMUSG00000037217 / ENSG00000008056 / ENSRNOG00000010365  
SYN2 / Q92777 / ENSMUSG00000009394 / ENSG00000157152 / ENSRNOG00000008157  
SYN3 / O14994 / ENSMUSG00000059602 / ENSG00000185666 / ENSRNOG00000026866  
SYNGR1 / O43759 / ENSMUSG00000022415 / ENSG00000100321 / ENSRNOG00000017108  
SYNGR3 / O43761 / ENSMUSG00000007021 / ENSG00000127561 / ENSRNOG00000012620  
SYNJ1 / O43426 / ENSMUSG00000022973 / ENSG00000159082 / ENSRNOG00000002051  
SYNM / O15061 / ENSMUSG00000030554 / ENSG00000182253 / ENSRNOG00000014030  
SYNPO / Q8N3V7 / ENSMUSG00000043079 / ENSG00000171992 / ENSRNOG00000019181  
SYNPO2 / Q9UMS6 / ENSMUSG00000050315 / ENSG00000172403 / ENSRNOG00000014867  
SYNPO2L / Q9H987 / ENSMUSG00000039376 / ENSG00000166317 / ENSRNOG00000008949

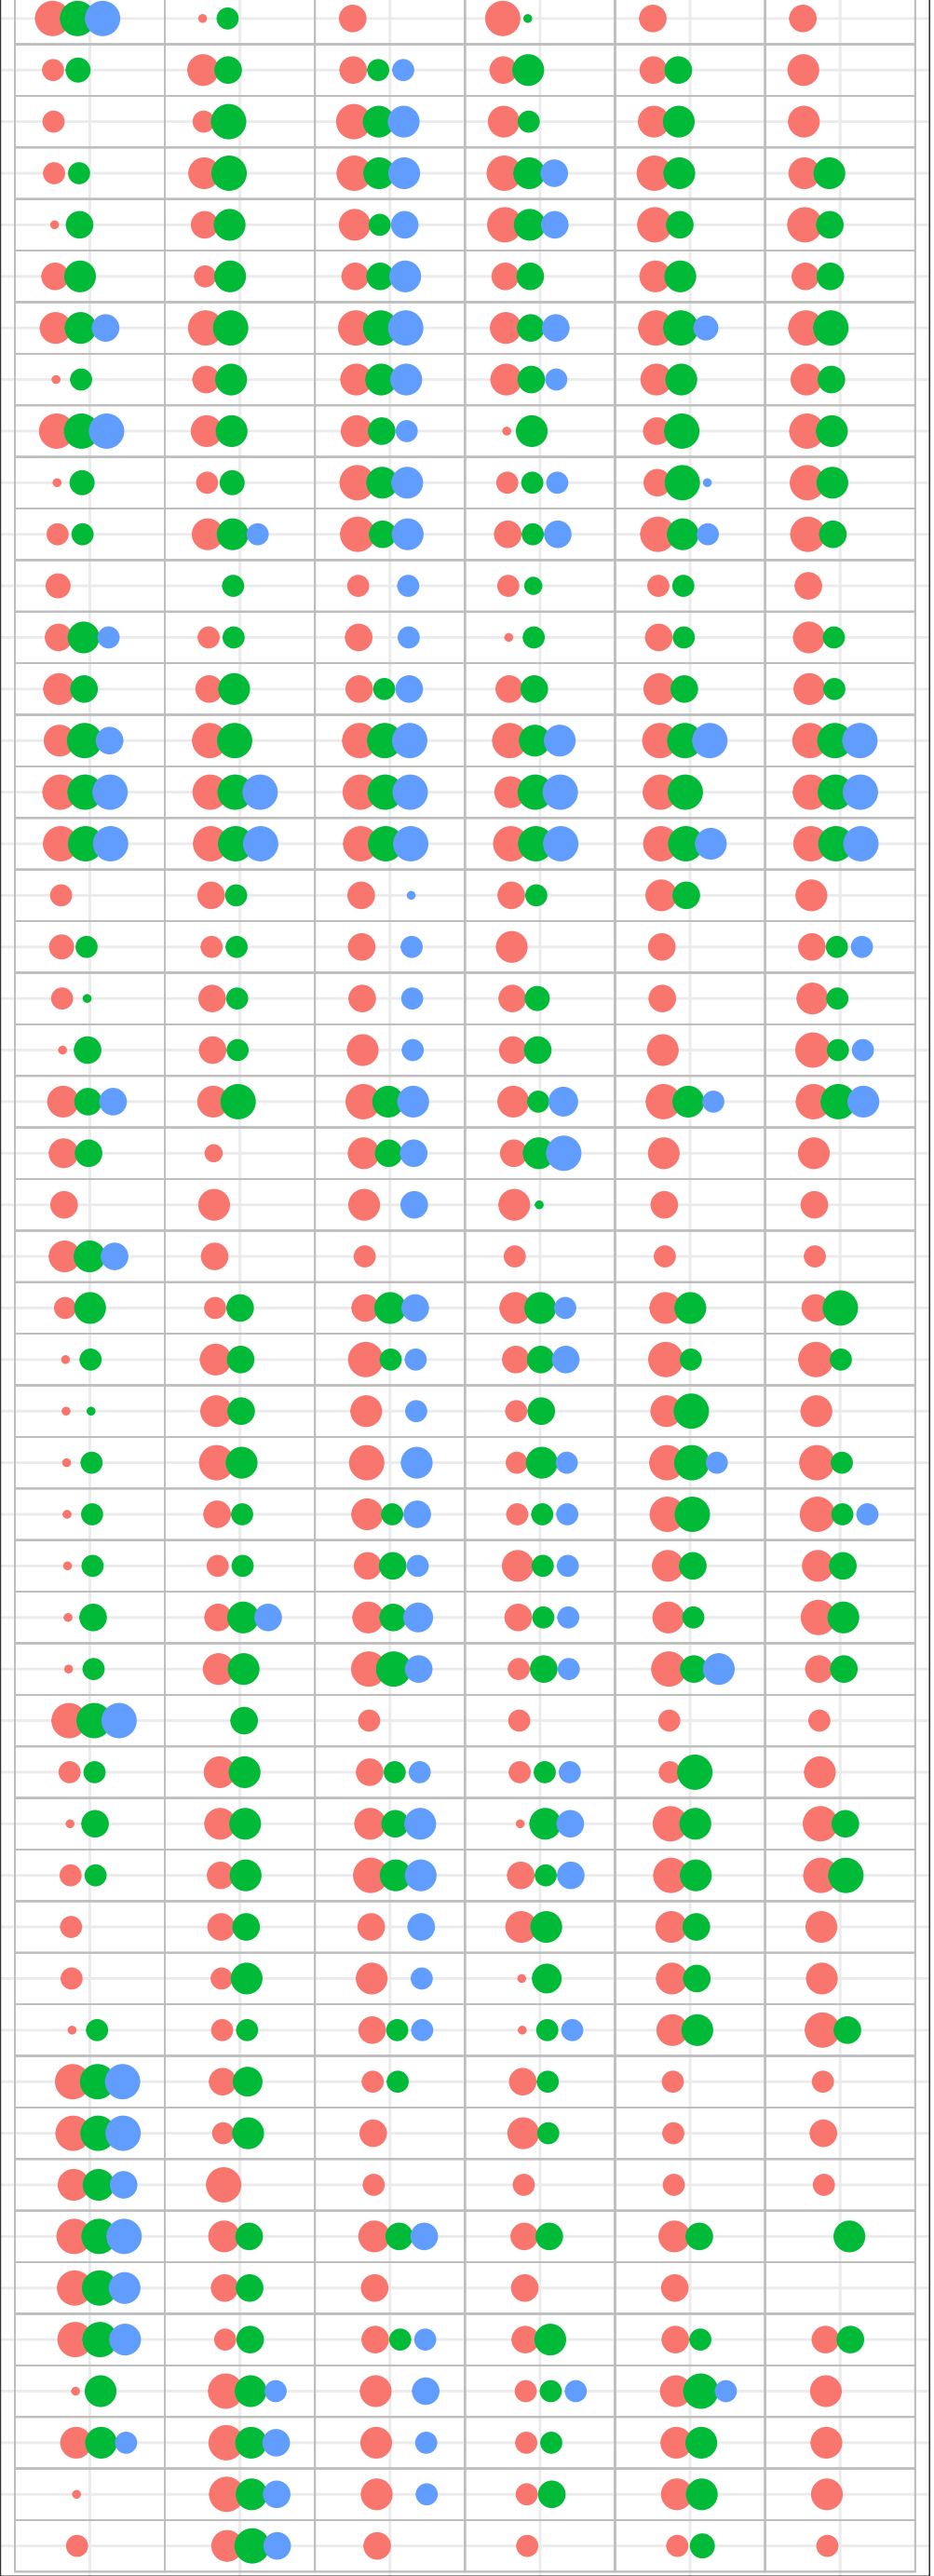

Bins



Species



Organs



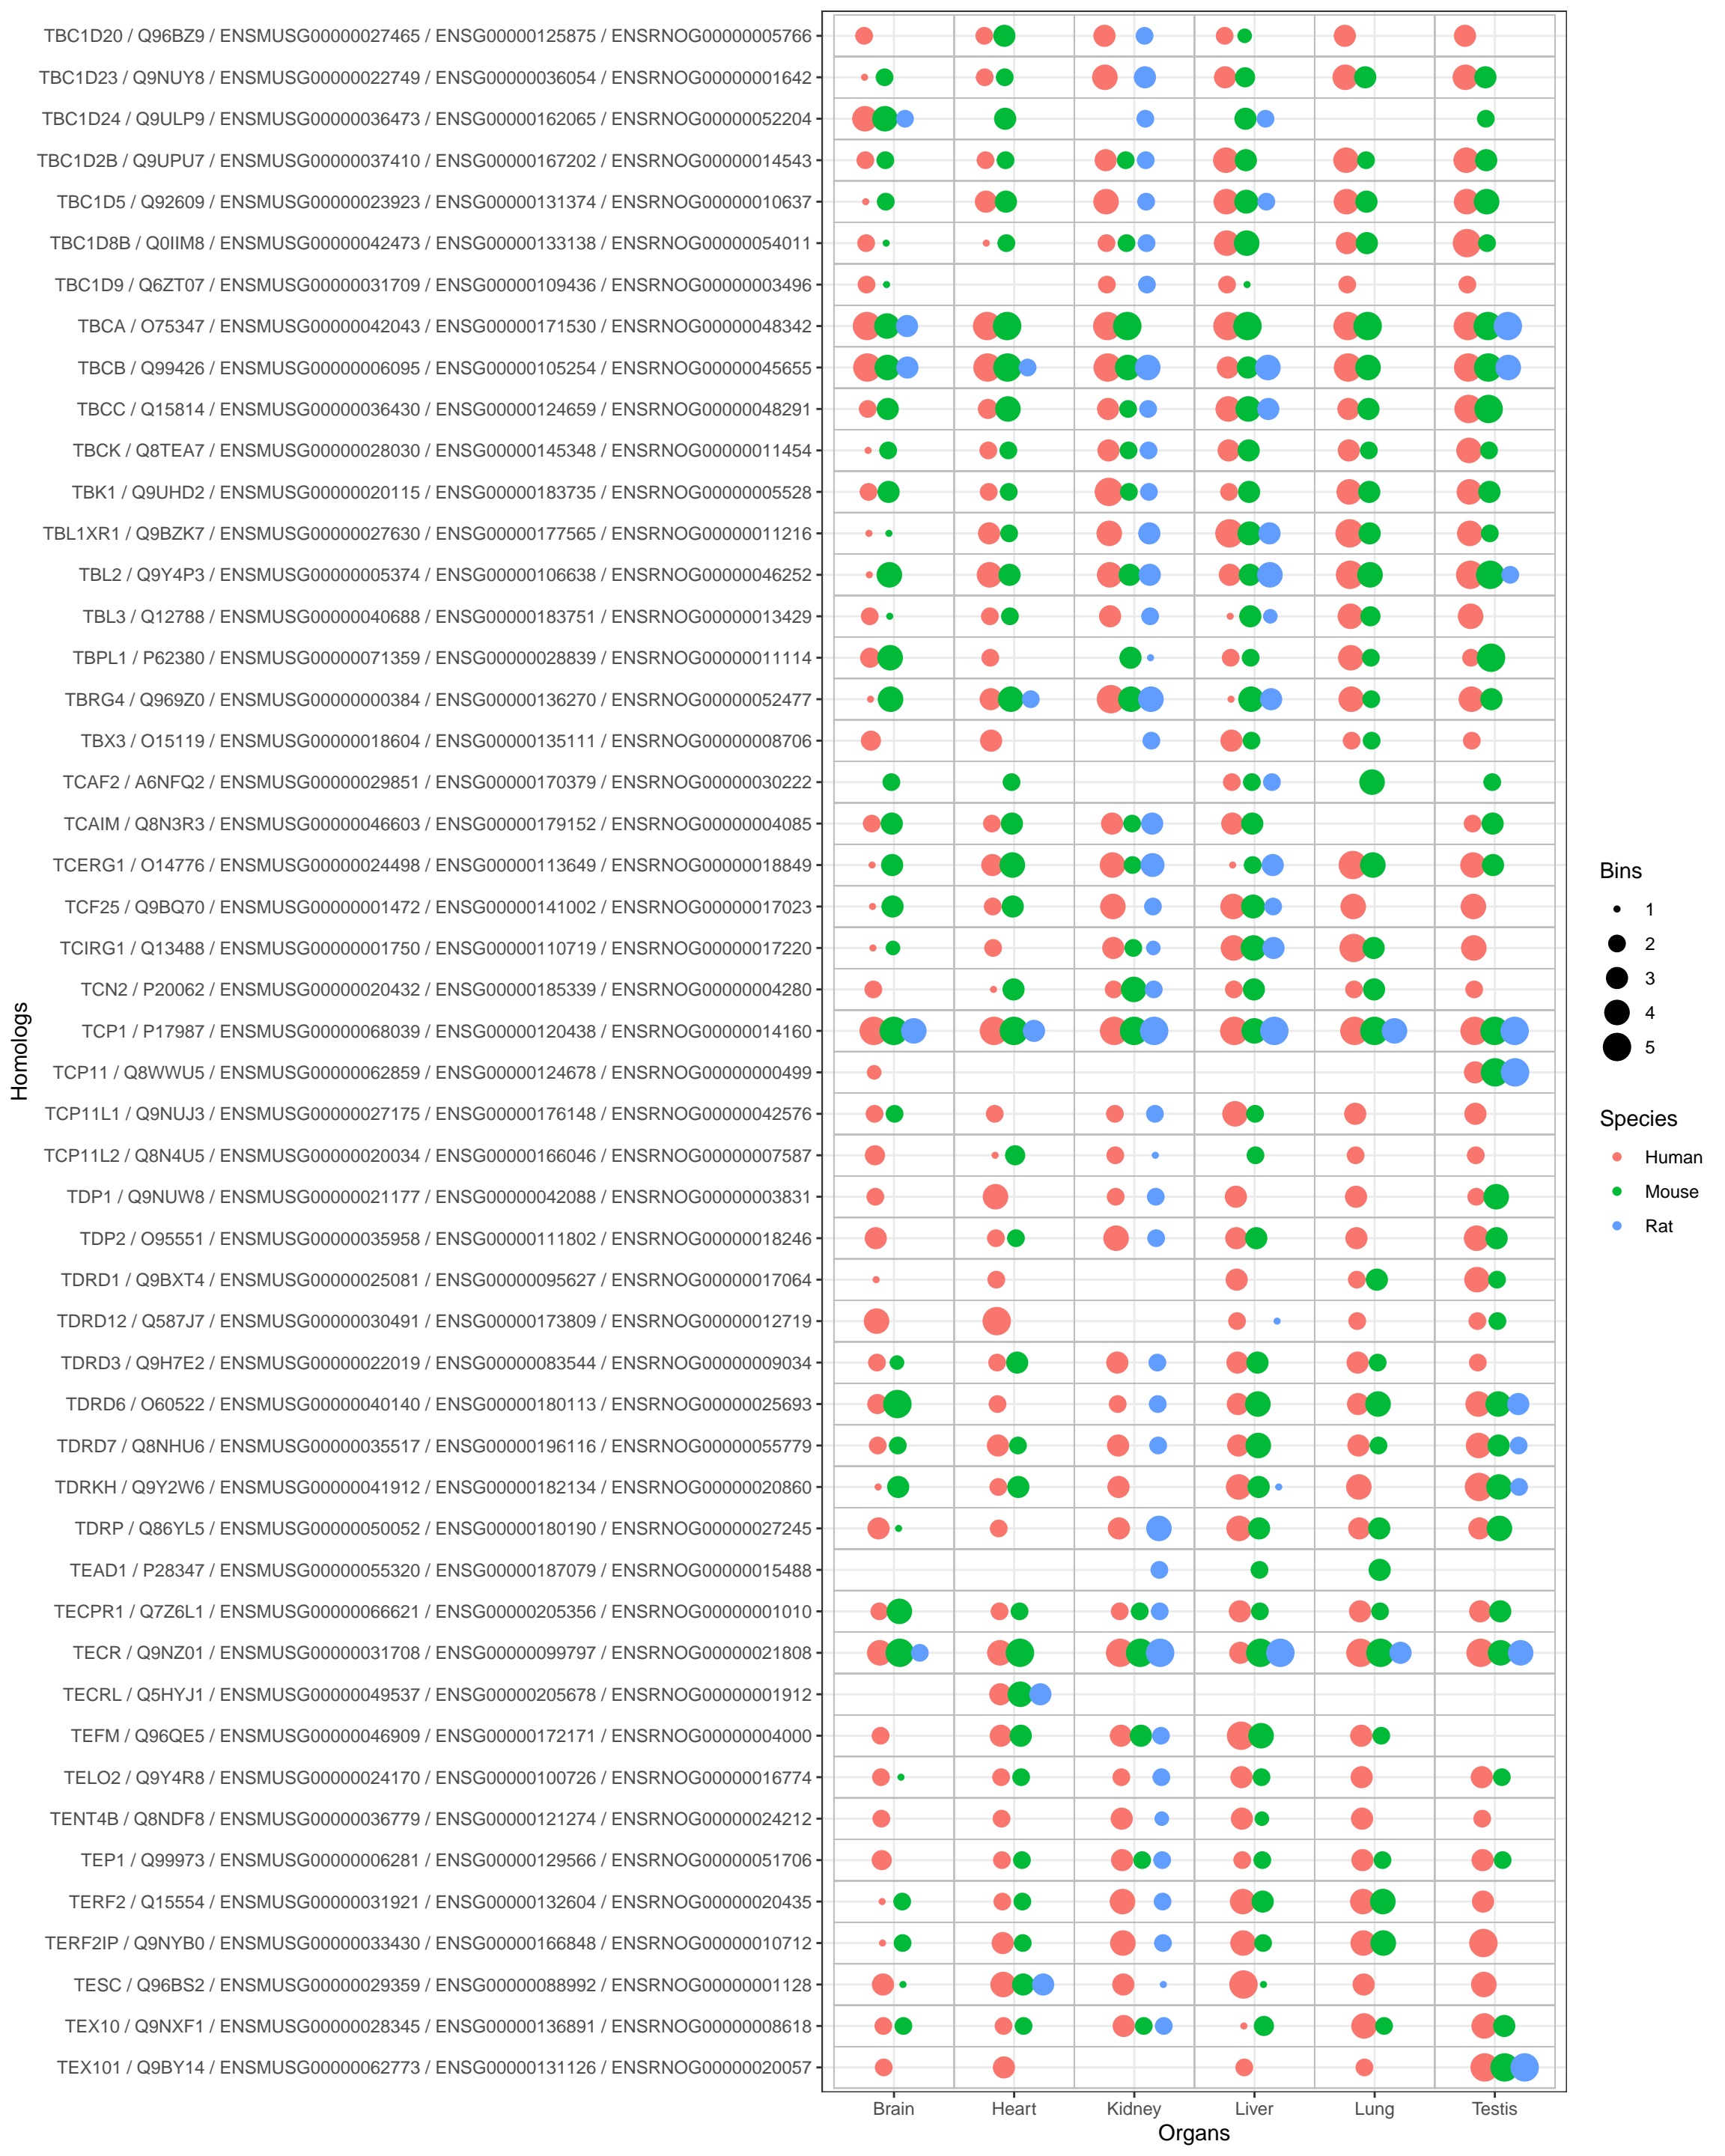

Homologs

TEX2 / Q8IWB9 / ENSMUSG00000040548 / ENSG00000136478 / ENSRNOG00000013659  
TEX264 / Q9Y6I9 / ENSMUSG00000040813 / ENSG00000164081 / ENSRNOG00000013201  
TFAM / Q00059 / ENSMUSG00000003923 / ENSG00000108064 / ENSRNOG00000000613  
TFB1M / Q8WVM0 / ENSMUSG00000036983 / ENSG00000029639 / ENSRNOG00000056223  
TFCP2 / Q12800 / ENSMUSG00000009733 / ENSG00000135457 / ENSRNOG00000032395  
TFE3 / P19532 / ENSMUSG00000000134 / ENSG00000068323 / ENSRNOG00000009605  
TFEB / P19484 / ENSMUSG00000023990 / ENSG00000112561 / ENSRNOG00000014666  
TFG / Q92734 / ENSMUSG00000022757 / ENSG00000114354 / ENSRNOG00000001633  
TFIP11 / Q9UBB9 / ENSMUSG00000029345 / ENSG00000100109 / ENSRNOG00000000663  
TFR2 / Q9UP52 / ENSMUSG00000029716 / ENSG00000106327 / ENSRNOG00000001407  
TFRC / P02786 / ENSMUSG00000022797 / ENSG00000072274 / ENSRNOG00000001766  
TGFB1I1 / O43294 / ENSMUSG00000030782 / ENSG00000140682 / ENSRNOG00000019965  
TGFB1 / Q15582 / ENSMUSG00000035493 / ENSG00000120708 / ENSRNOG00000012216  
TGFBR1 / P36897 / ENSMUSG00000007613 / ENSG00000106799 / ENSRNOG00000007036  
TGFBR2 / P37173 / ENSMUSG00000032440 / ENSG00000163513 / ENSRNOG00000013265  
TGFBRAP1 / Q8WUH2 / ENSMUSG00000070939 / ENSG00000135966 / ENSRNOG00000024562  
TGM2 / P21980 / ENSMUSG00000037820 / ENSG00000198959 / ENSRNOG00000012956  
TGM3 / Q08188 / ENSMUSG00000027401 / ENSG00000125780 / ENSRNOG00000006753  
TGOLN2 / O43493 / ENSMUSG00000056429 / ENSG00000152291 / ENSRNOG00000014617  
TGS1 / Q96RS0 / ENSMUSG00000028233 / ENSG00000137574 / ENSRNOG00000008156  
TH / P07101 / ENSMUSG00000000214 / ENSG00000180176 / ENSRNOG00000020410  
THAP4 / Q8WY91 / ENSMUSG00000026279 / ENSG00000176946 / ENSRNOG00000018351  
THBD / P07204 / ENSMUSG00000074743 / ENSG00000178726 / ENSRNOG00000004687  
THBS2 / P35442 / ENSMUSG00000023885 / ENSG00000186340 / ENSRNOG00000010529  
THBS4 / P35443 / ENSMUSG00000021702 / ENSG00000113296 / ENSRNOG00000012471  
THEM4 / Q5T1C6 / ENSMUSG00000028145 / ENSG00000159445 / ENSRNOG00000020829  
THEM6 / Q8WUY1 / ENSMUSG00000056665 / ENSG00000130193 / ENSRNOG00000005929  
THG1L / Q9NWX6 / ENSMUSG00000011254 / ENSG00000113272 / ENSRNOG00000005539  
THNSL2 / Q86YJ6 / ENSMUSG00000054474 / ENSG00000144115 / ENSRNOG00000006508  
THOC2 / Q8NI27 / ENSMUSG00000037475 / ENSG00000125676 / ENSRNOG00000007315  
THOC3 / Q96J01 / ENSMUSG00000025872 / ENSG00000051596 / ENSRNOG00000000104  
THOC5 / Q13769 / ENSMUSG00000034274 / ENSG00000100296 / ENSRNOG00000008456  
THOC6 / Q86W42 / ENSMUSG00000041319 / ENSG00000131652 / ENSRNOG00000003497  
THOC7 / Q6I9Y2 / ENSMUSG00000053453 / ENSG00000163634 / ENSRNOG00000007701  
THOP1 / P52888 / ENSMUSG0000004929 / ENSG00000172009 / ENSRNOG00000019924  
THRAP3 / Q9Y2W1 / ENSMUSG00000043962 / ENSG00000054118 / ENSRNOG00000009977  
THTPA / Q9BU02 / ENSMUSG00000045691 / ENSG00000259431 / ENSRNOG00000018105  
THUMPD1 / Q9NXG2 / ENSMUSG00000030942 / ENSG00000066654 / ENSRNOG00000061844  
THUMPD3 / Q9BV44 / ENSMUSG00000030264 / ENSG00000134077 / ENSRNOG00000006941  
THY1 / P04216 / ENSMUSG00000032011 / ENSG00000154096 / ENSRNOG00000006604  
TIAL1 / Q01085 / ENSMUSG00000030846 / ENSG00000151923 / ENSRNOG00000020271  
TIGAR / Q9NQ88 / ENSMUSG00000038028 / ENSG00000078237 / ENSRNOG00000051816  
TIMM10 / P62072 / ENSMUSG00000027076 / ENSG00000134809 / ENSRNOG00000007883  
TIMM13 / Q9Y5L4 / ENSMUSG00000020219 / ENSG00000099800 / ENSRNOG00000019682  
TIMM17A / Q99595 / ENSMUSG00000062580 / ENSG00000134375 / ENSRNOG00000007040  
TIMM17B / O60830 / ENSMUSG00000031158 / ENSG00000126768 / ENSRNOG00000048613  
TIMM21 / Q9BVV7 / ENSMUSG00000024645 / ENSG00000075336 / ENSRNOG00000015142  
TIMM29 / Q9BSF4 / ENSMUSG00000048429 / ENSG00000142444 / ENSRNOG00000009255  
TIMM44 / O43615 / ENSMUSG00000002949 / ENSG00000104980 / ENSRNOG00000001058  
TIMM50 / Q3ZCQ8 / ENSMUSG00000003438 / ENSG00000105197 / ENSRNOG00000037638

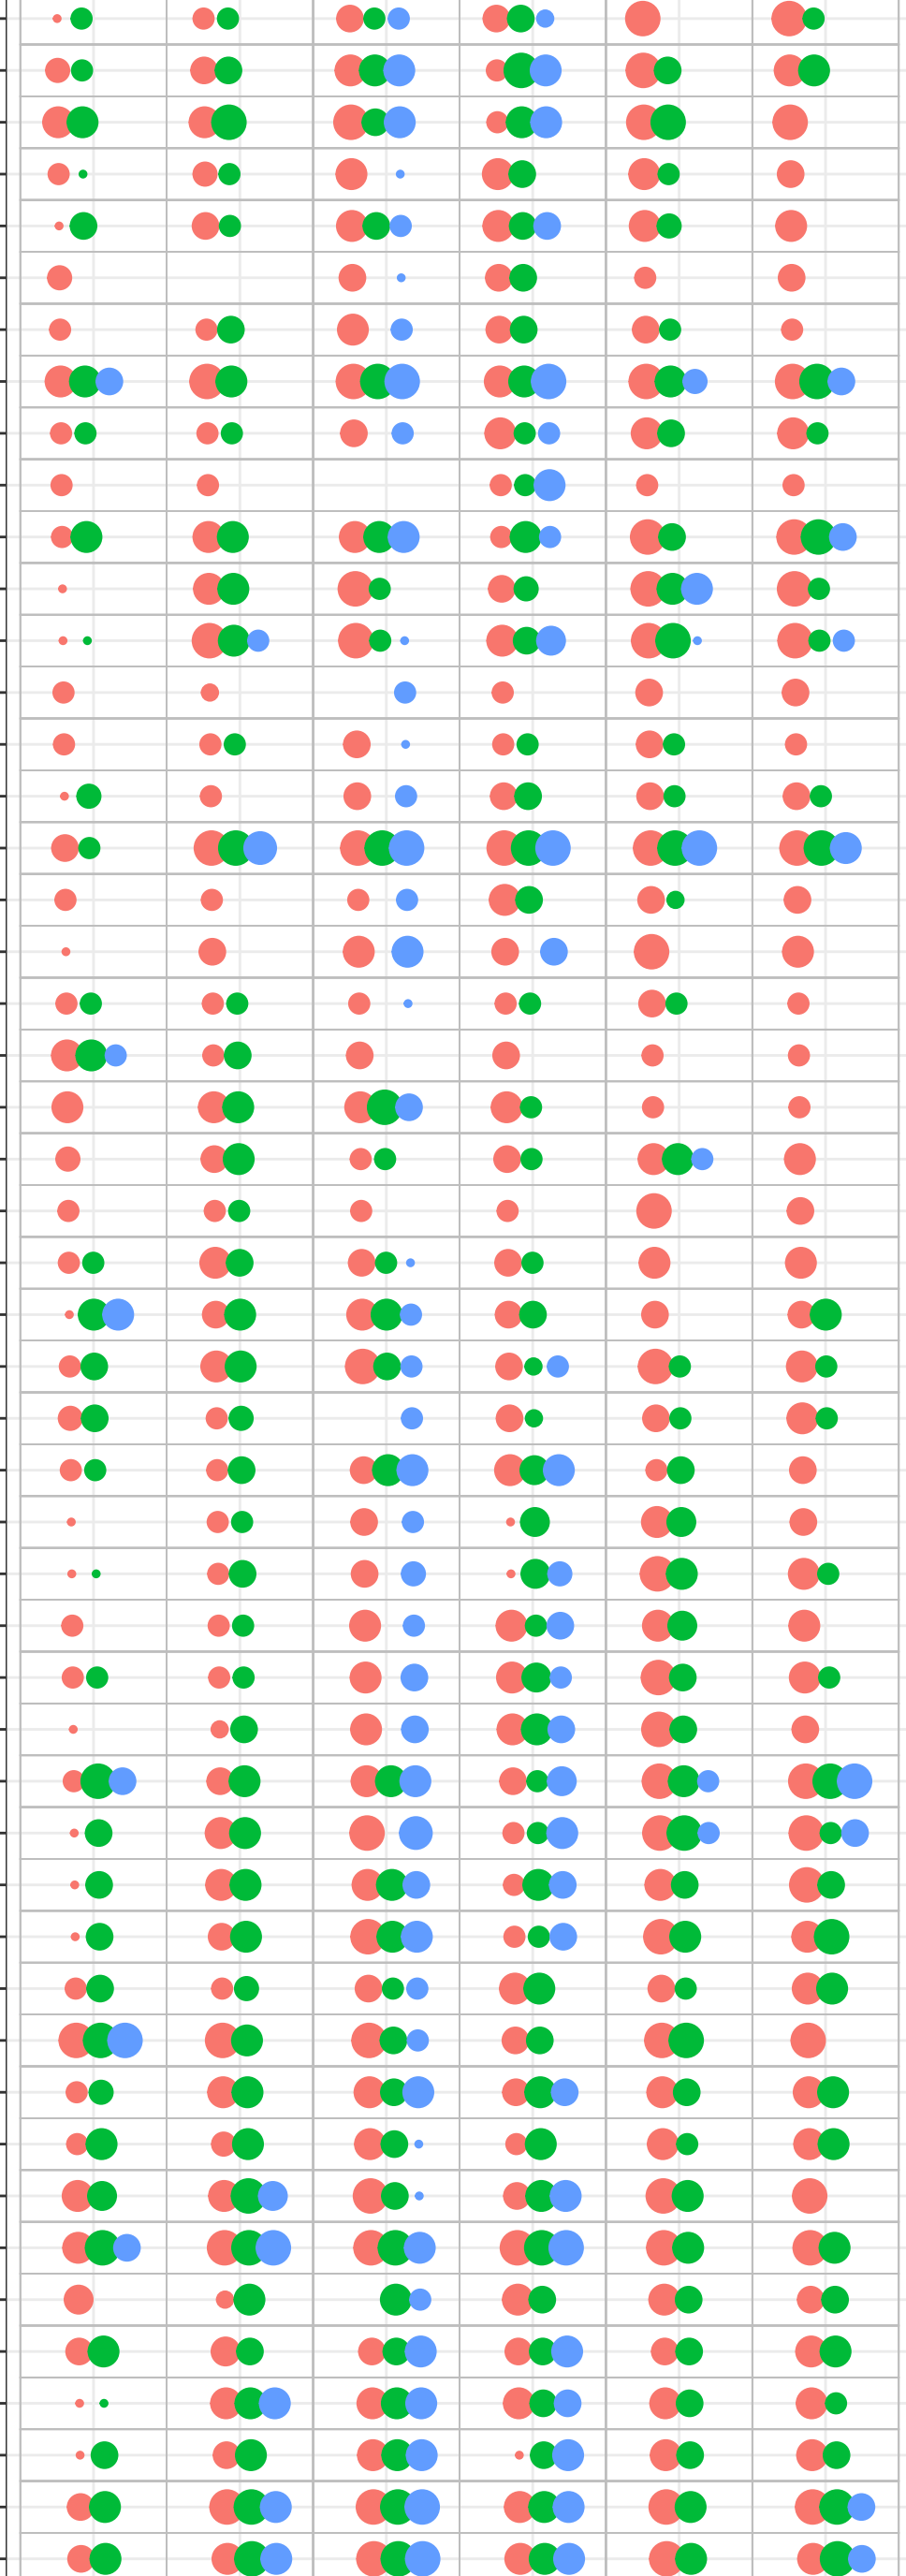

Bins

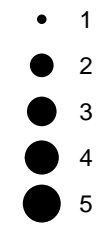

Species

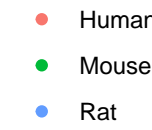

Organs







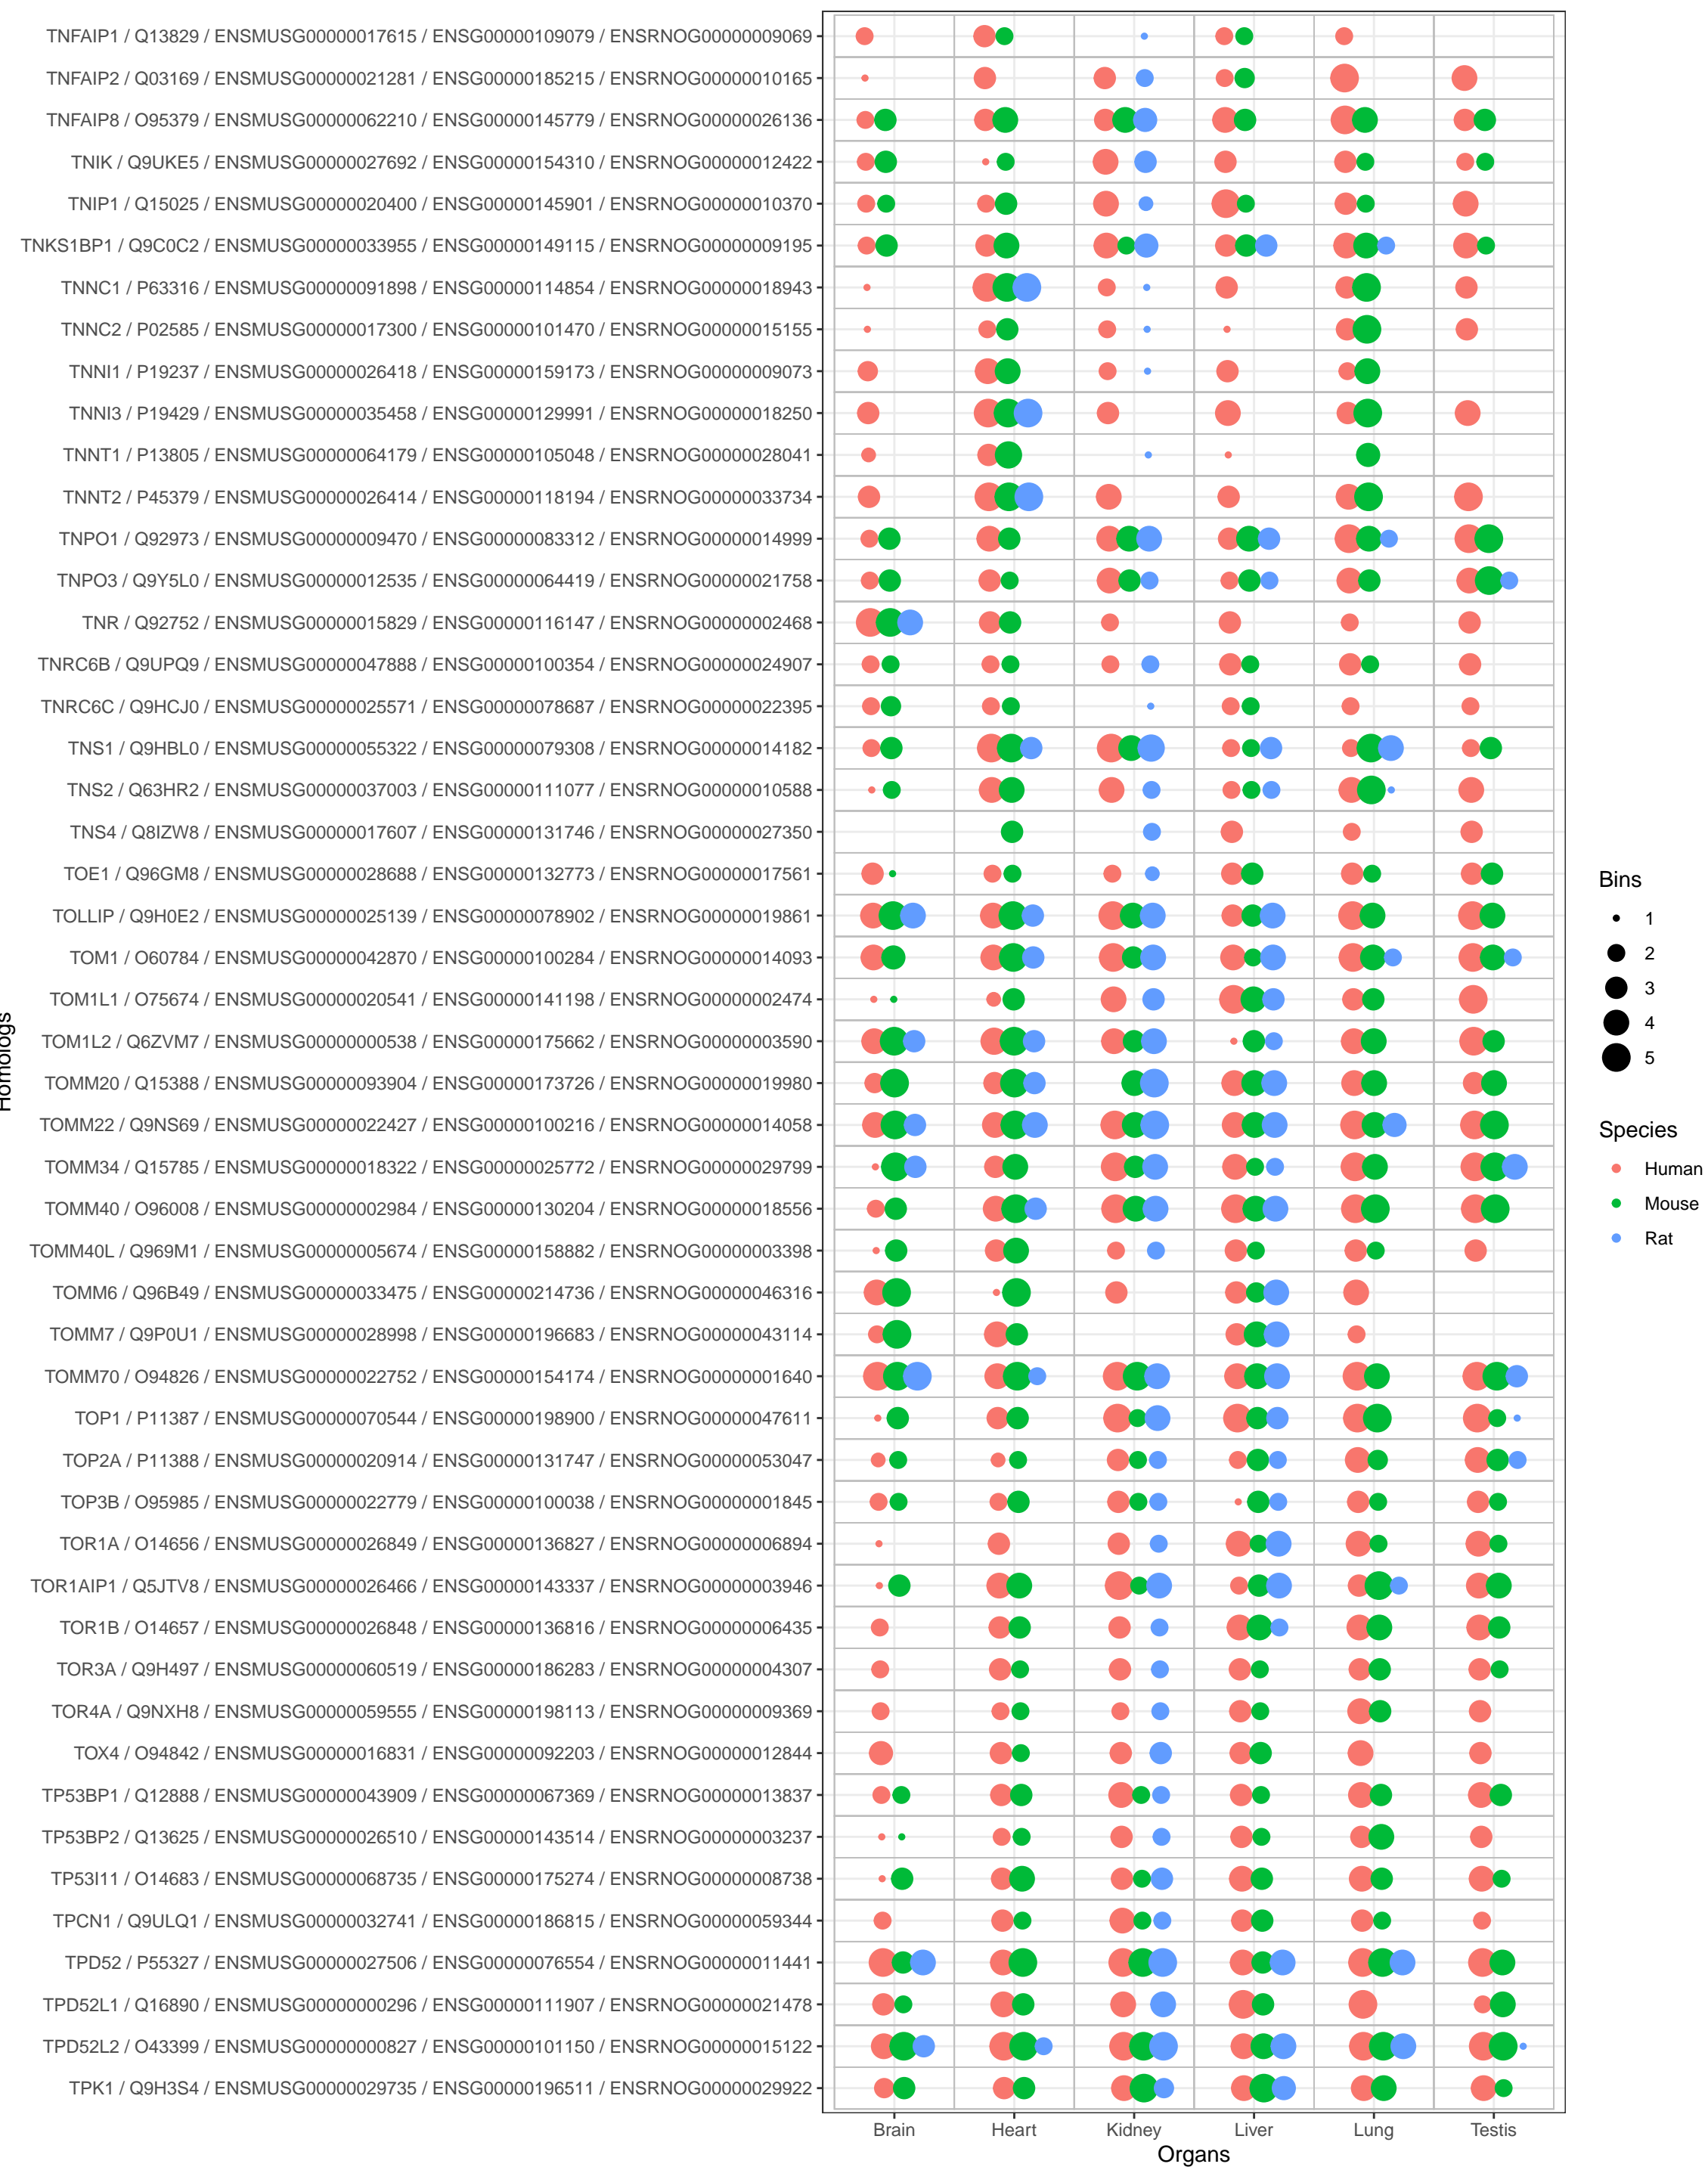

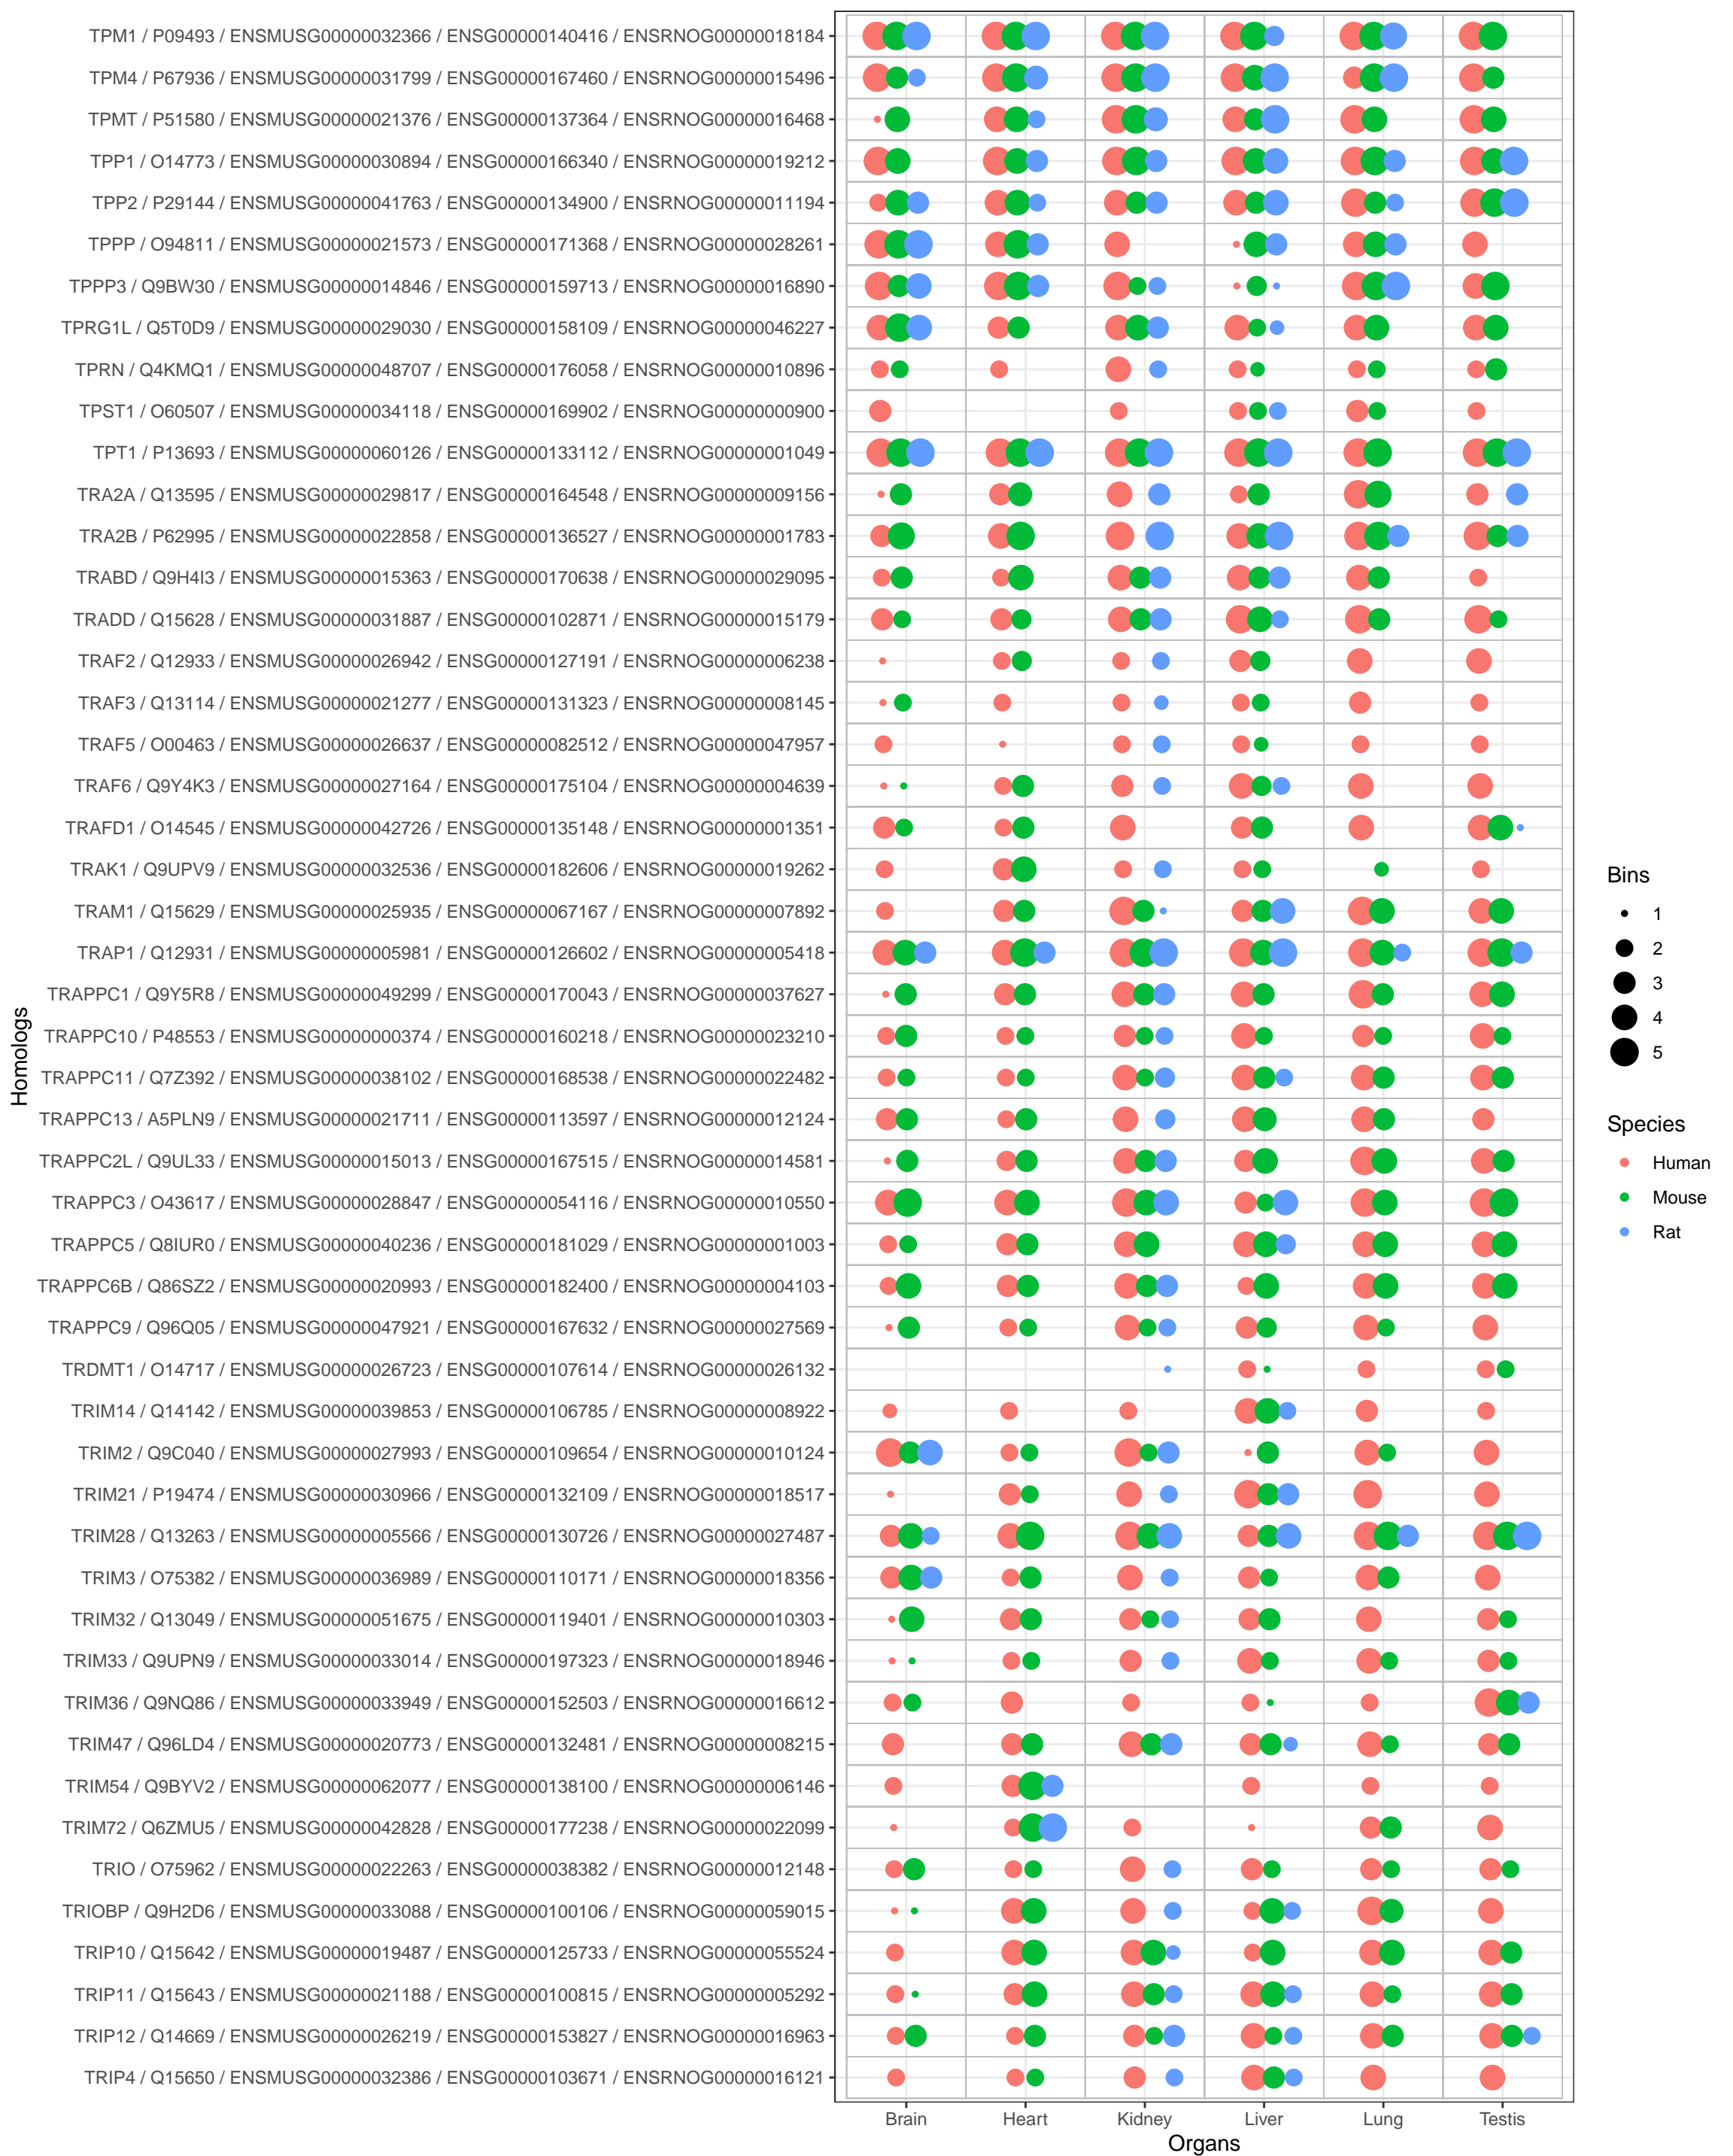

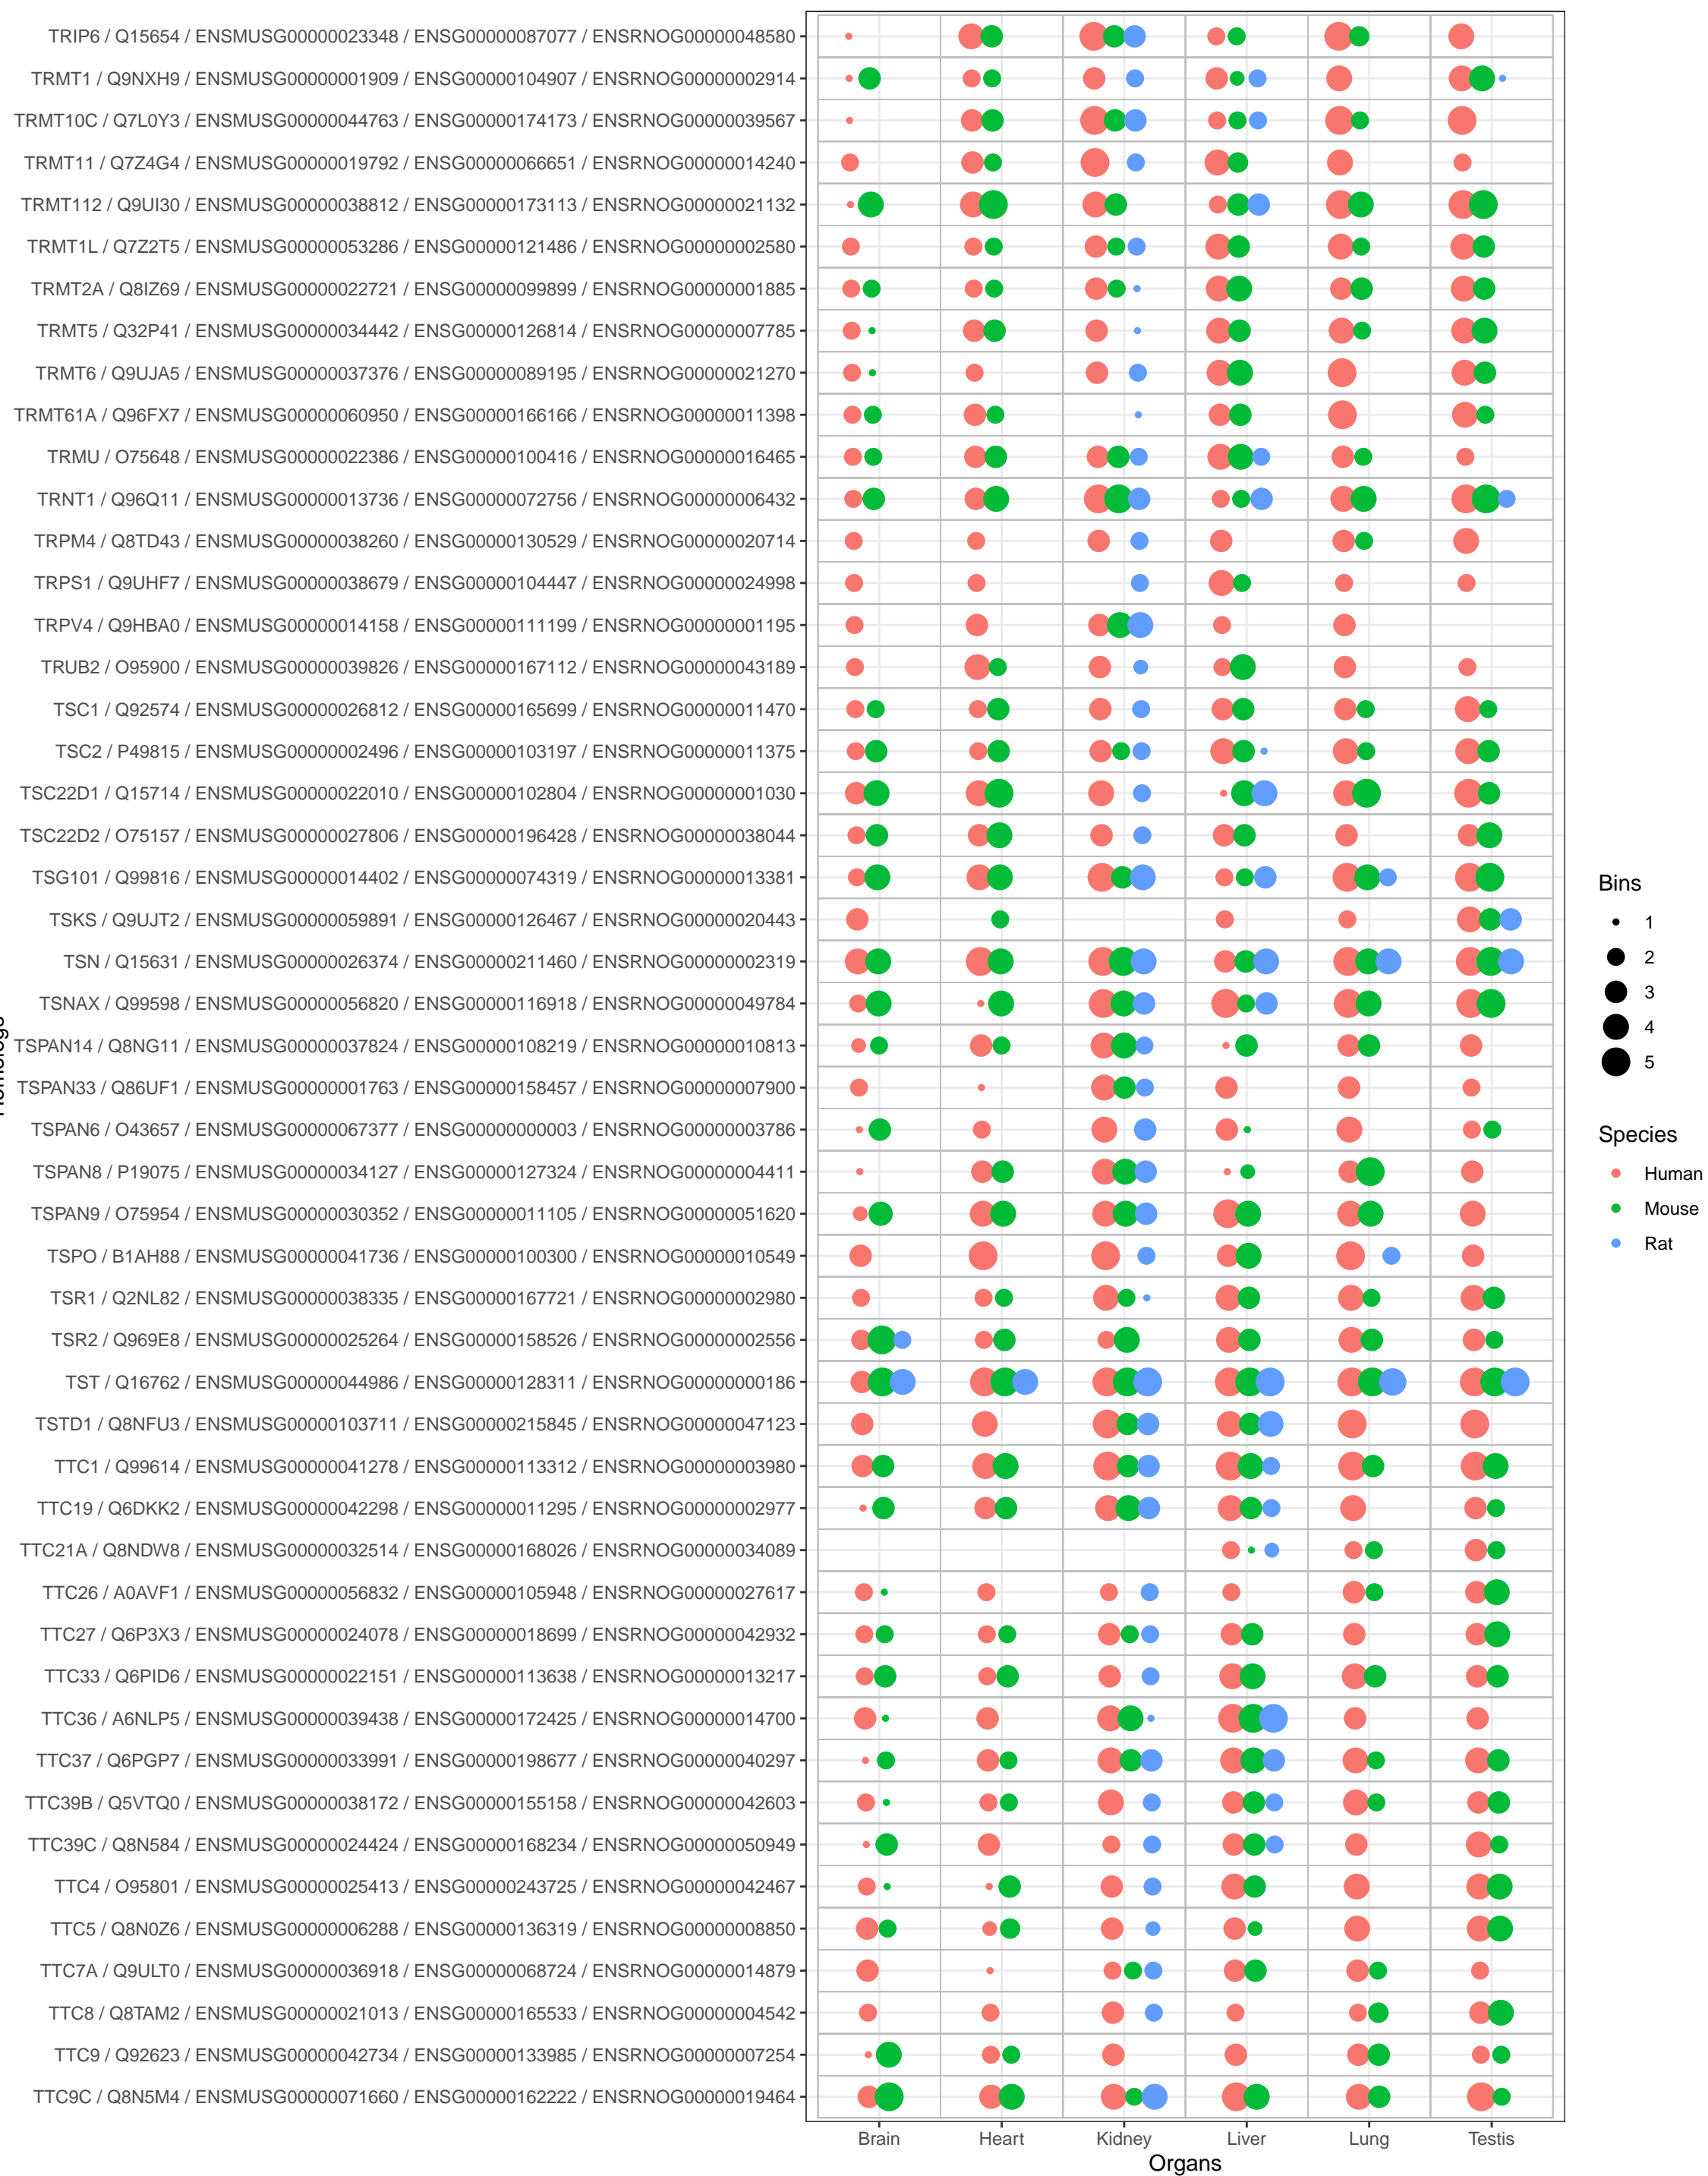

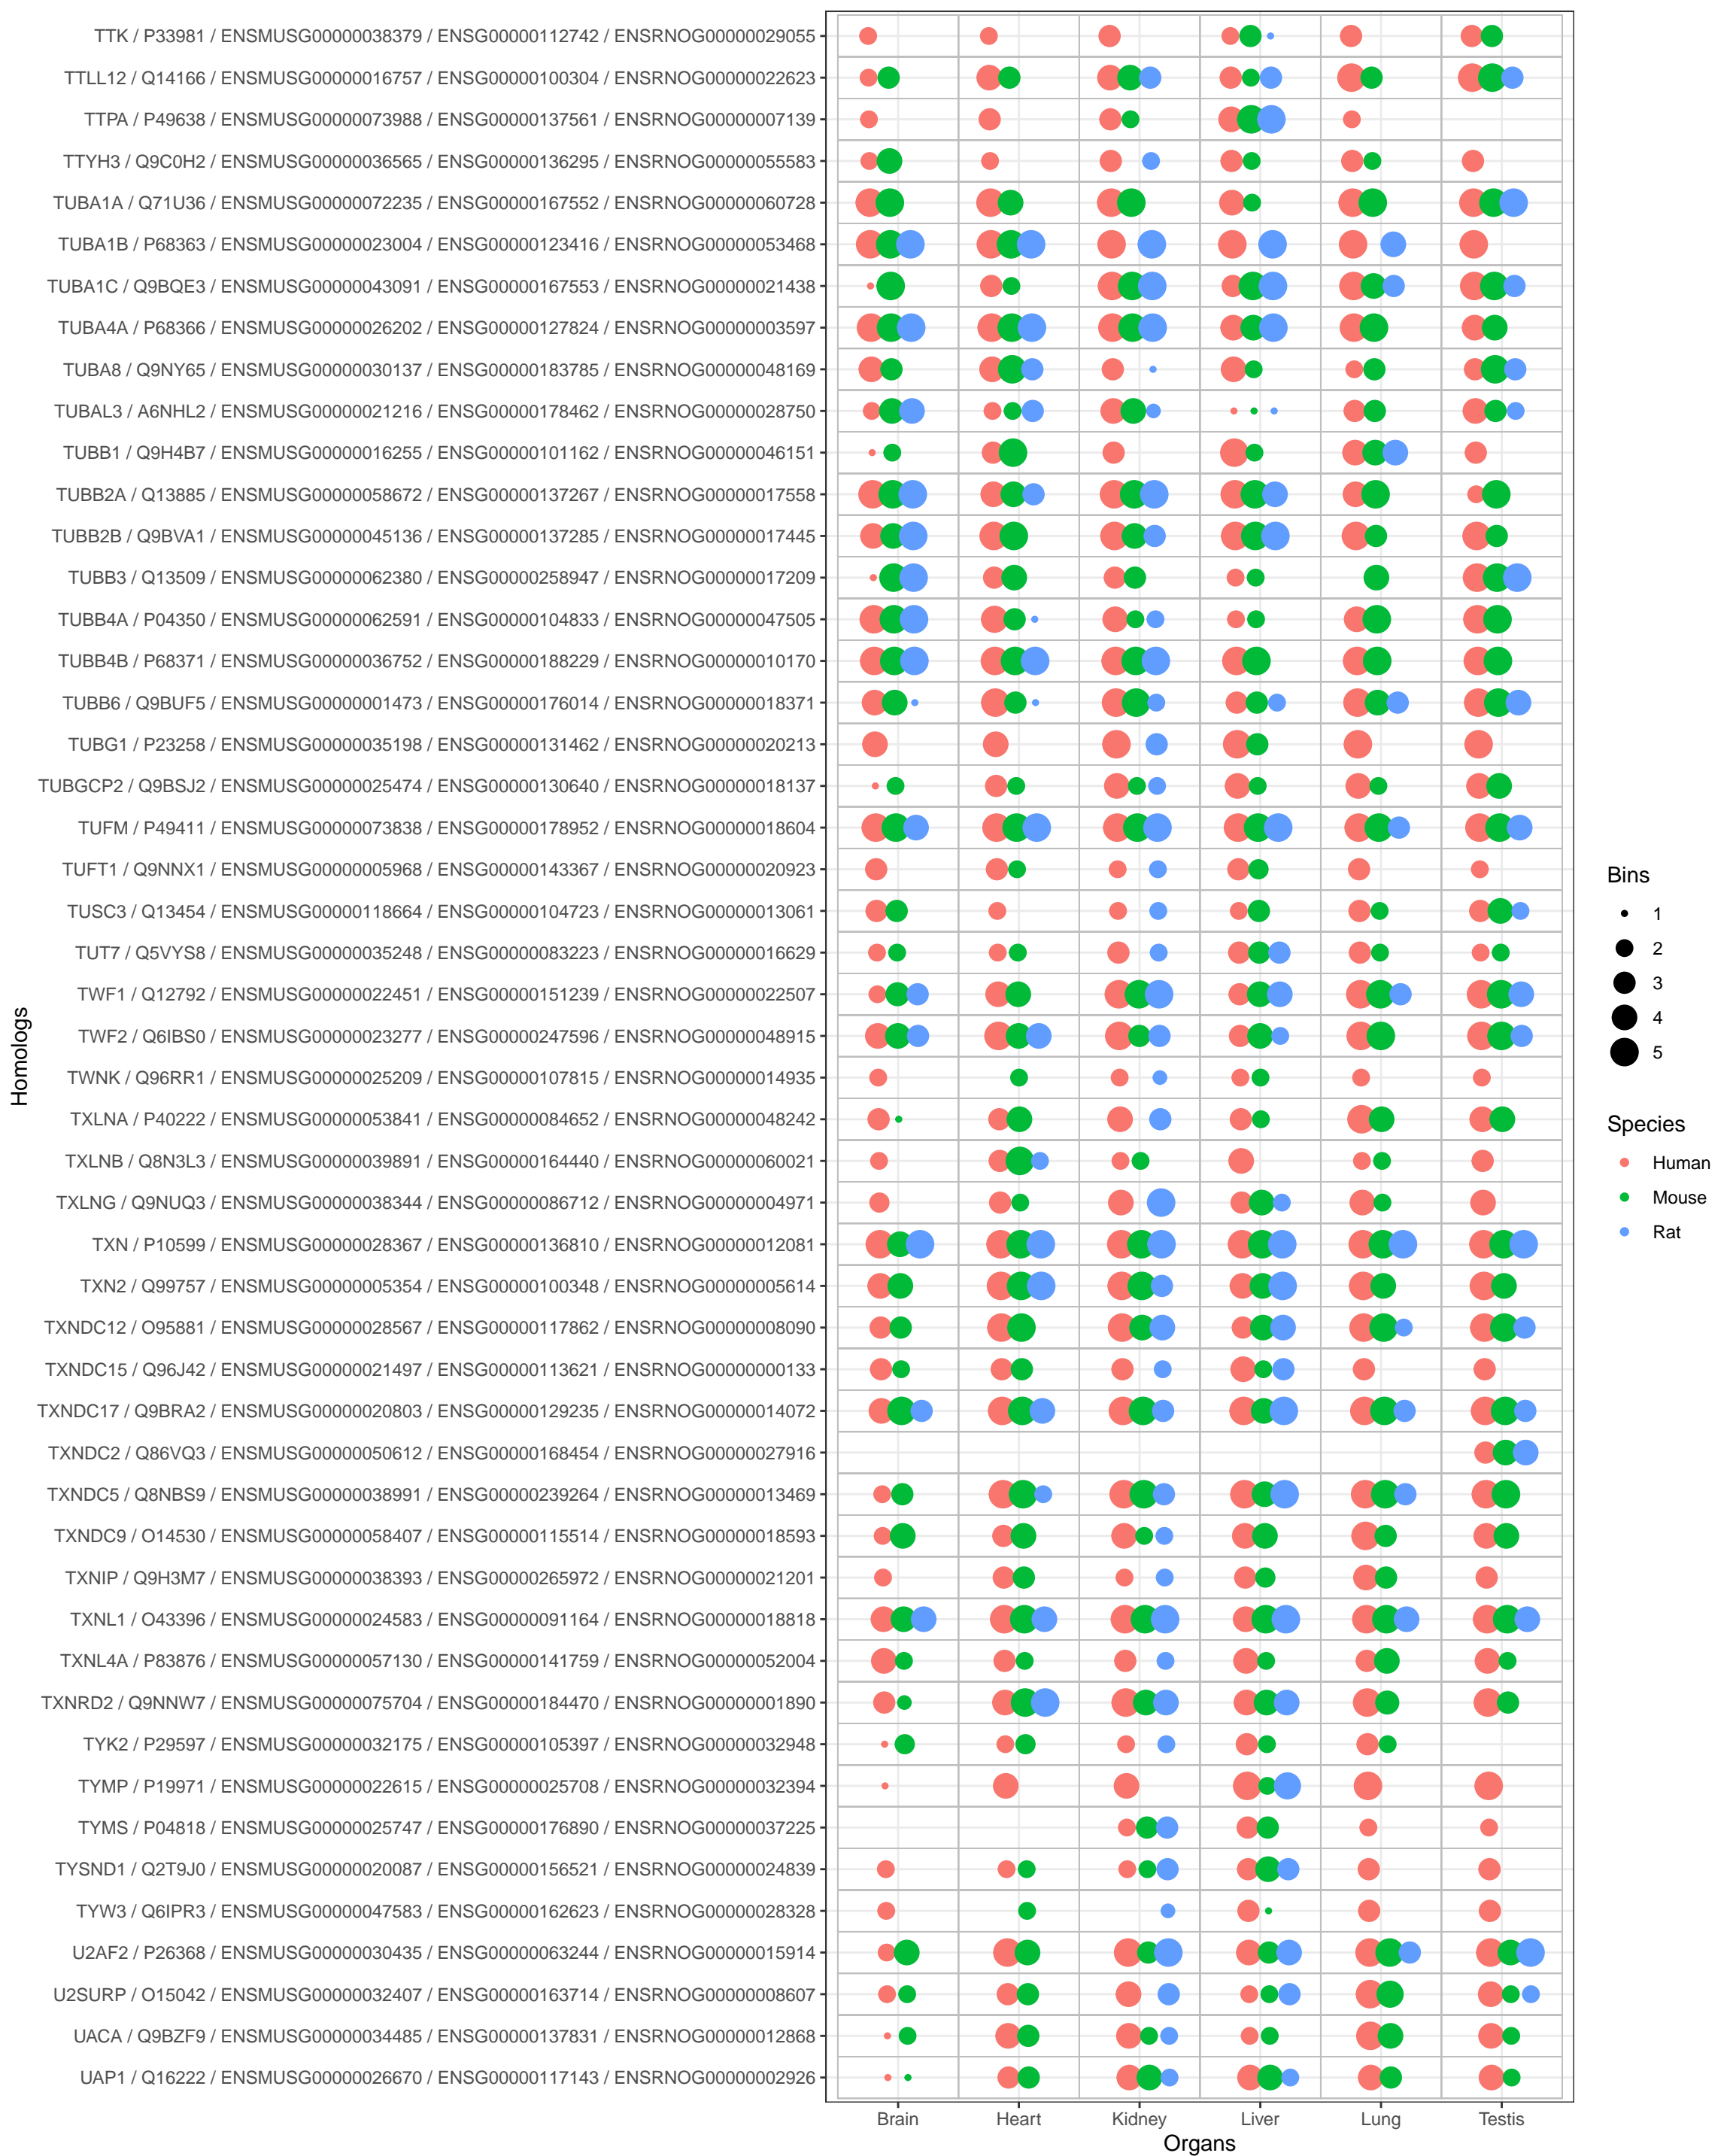

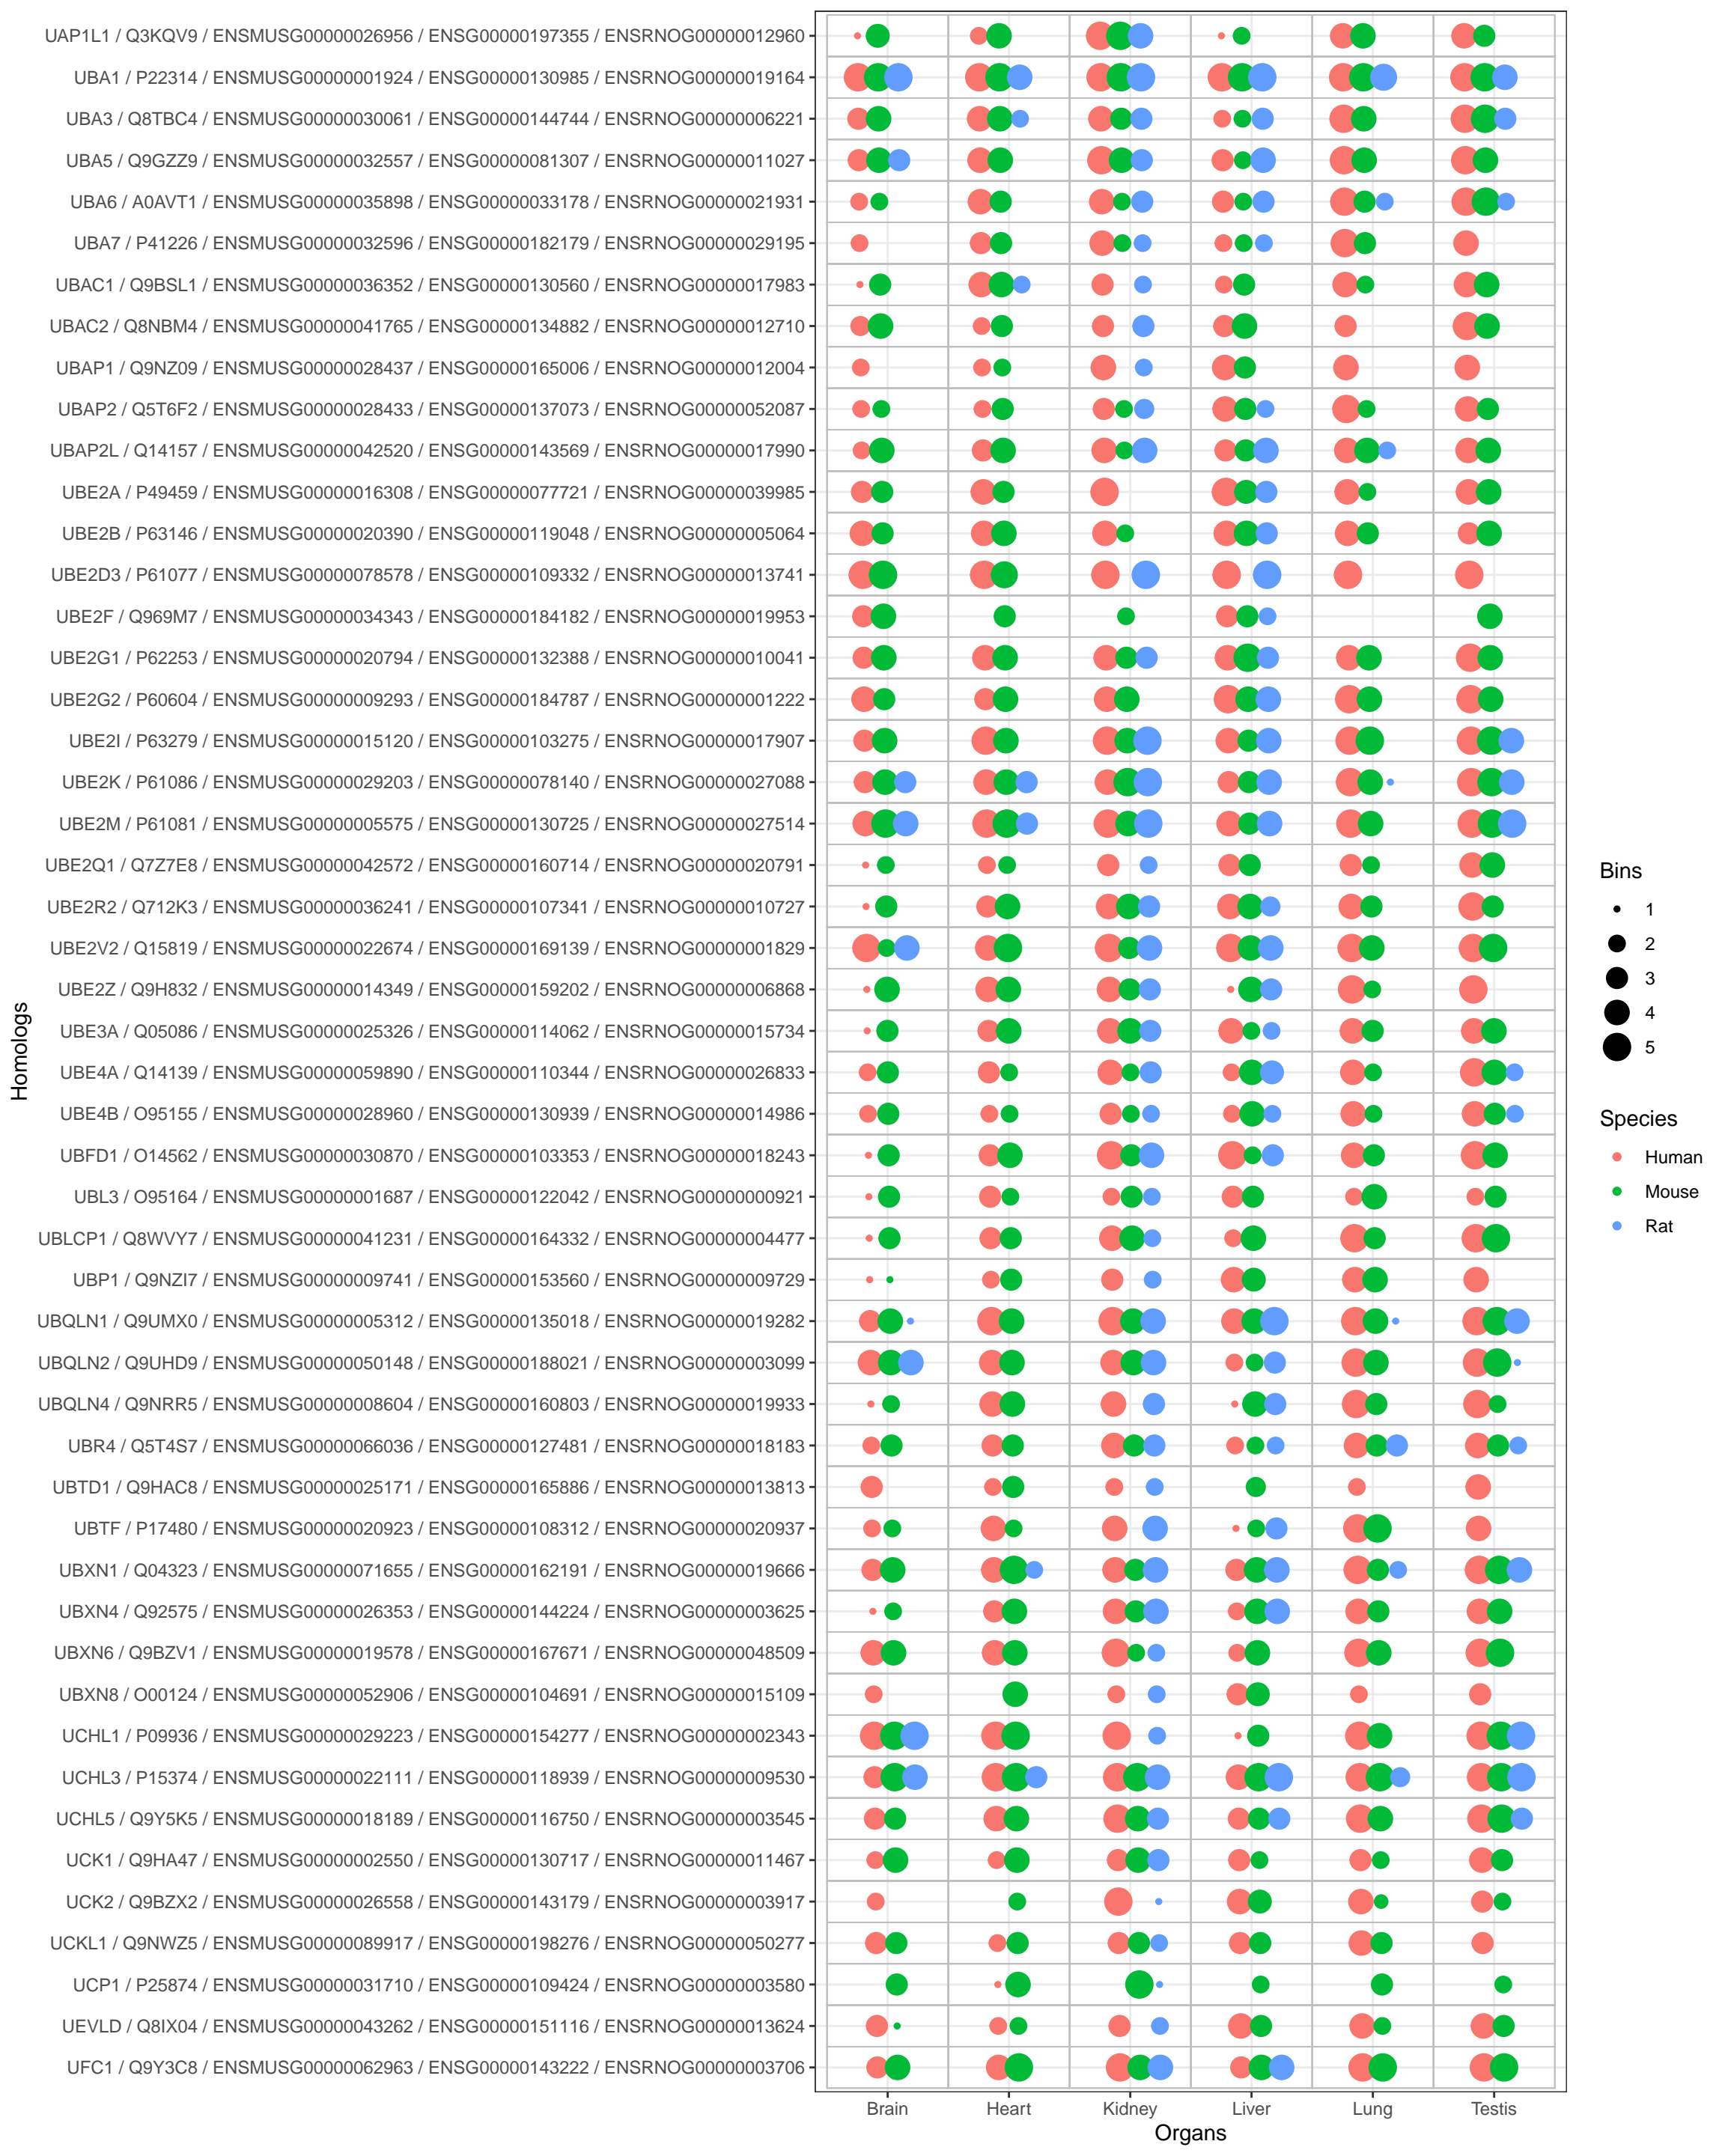

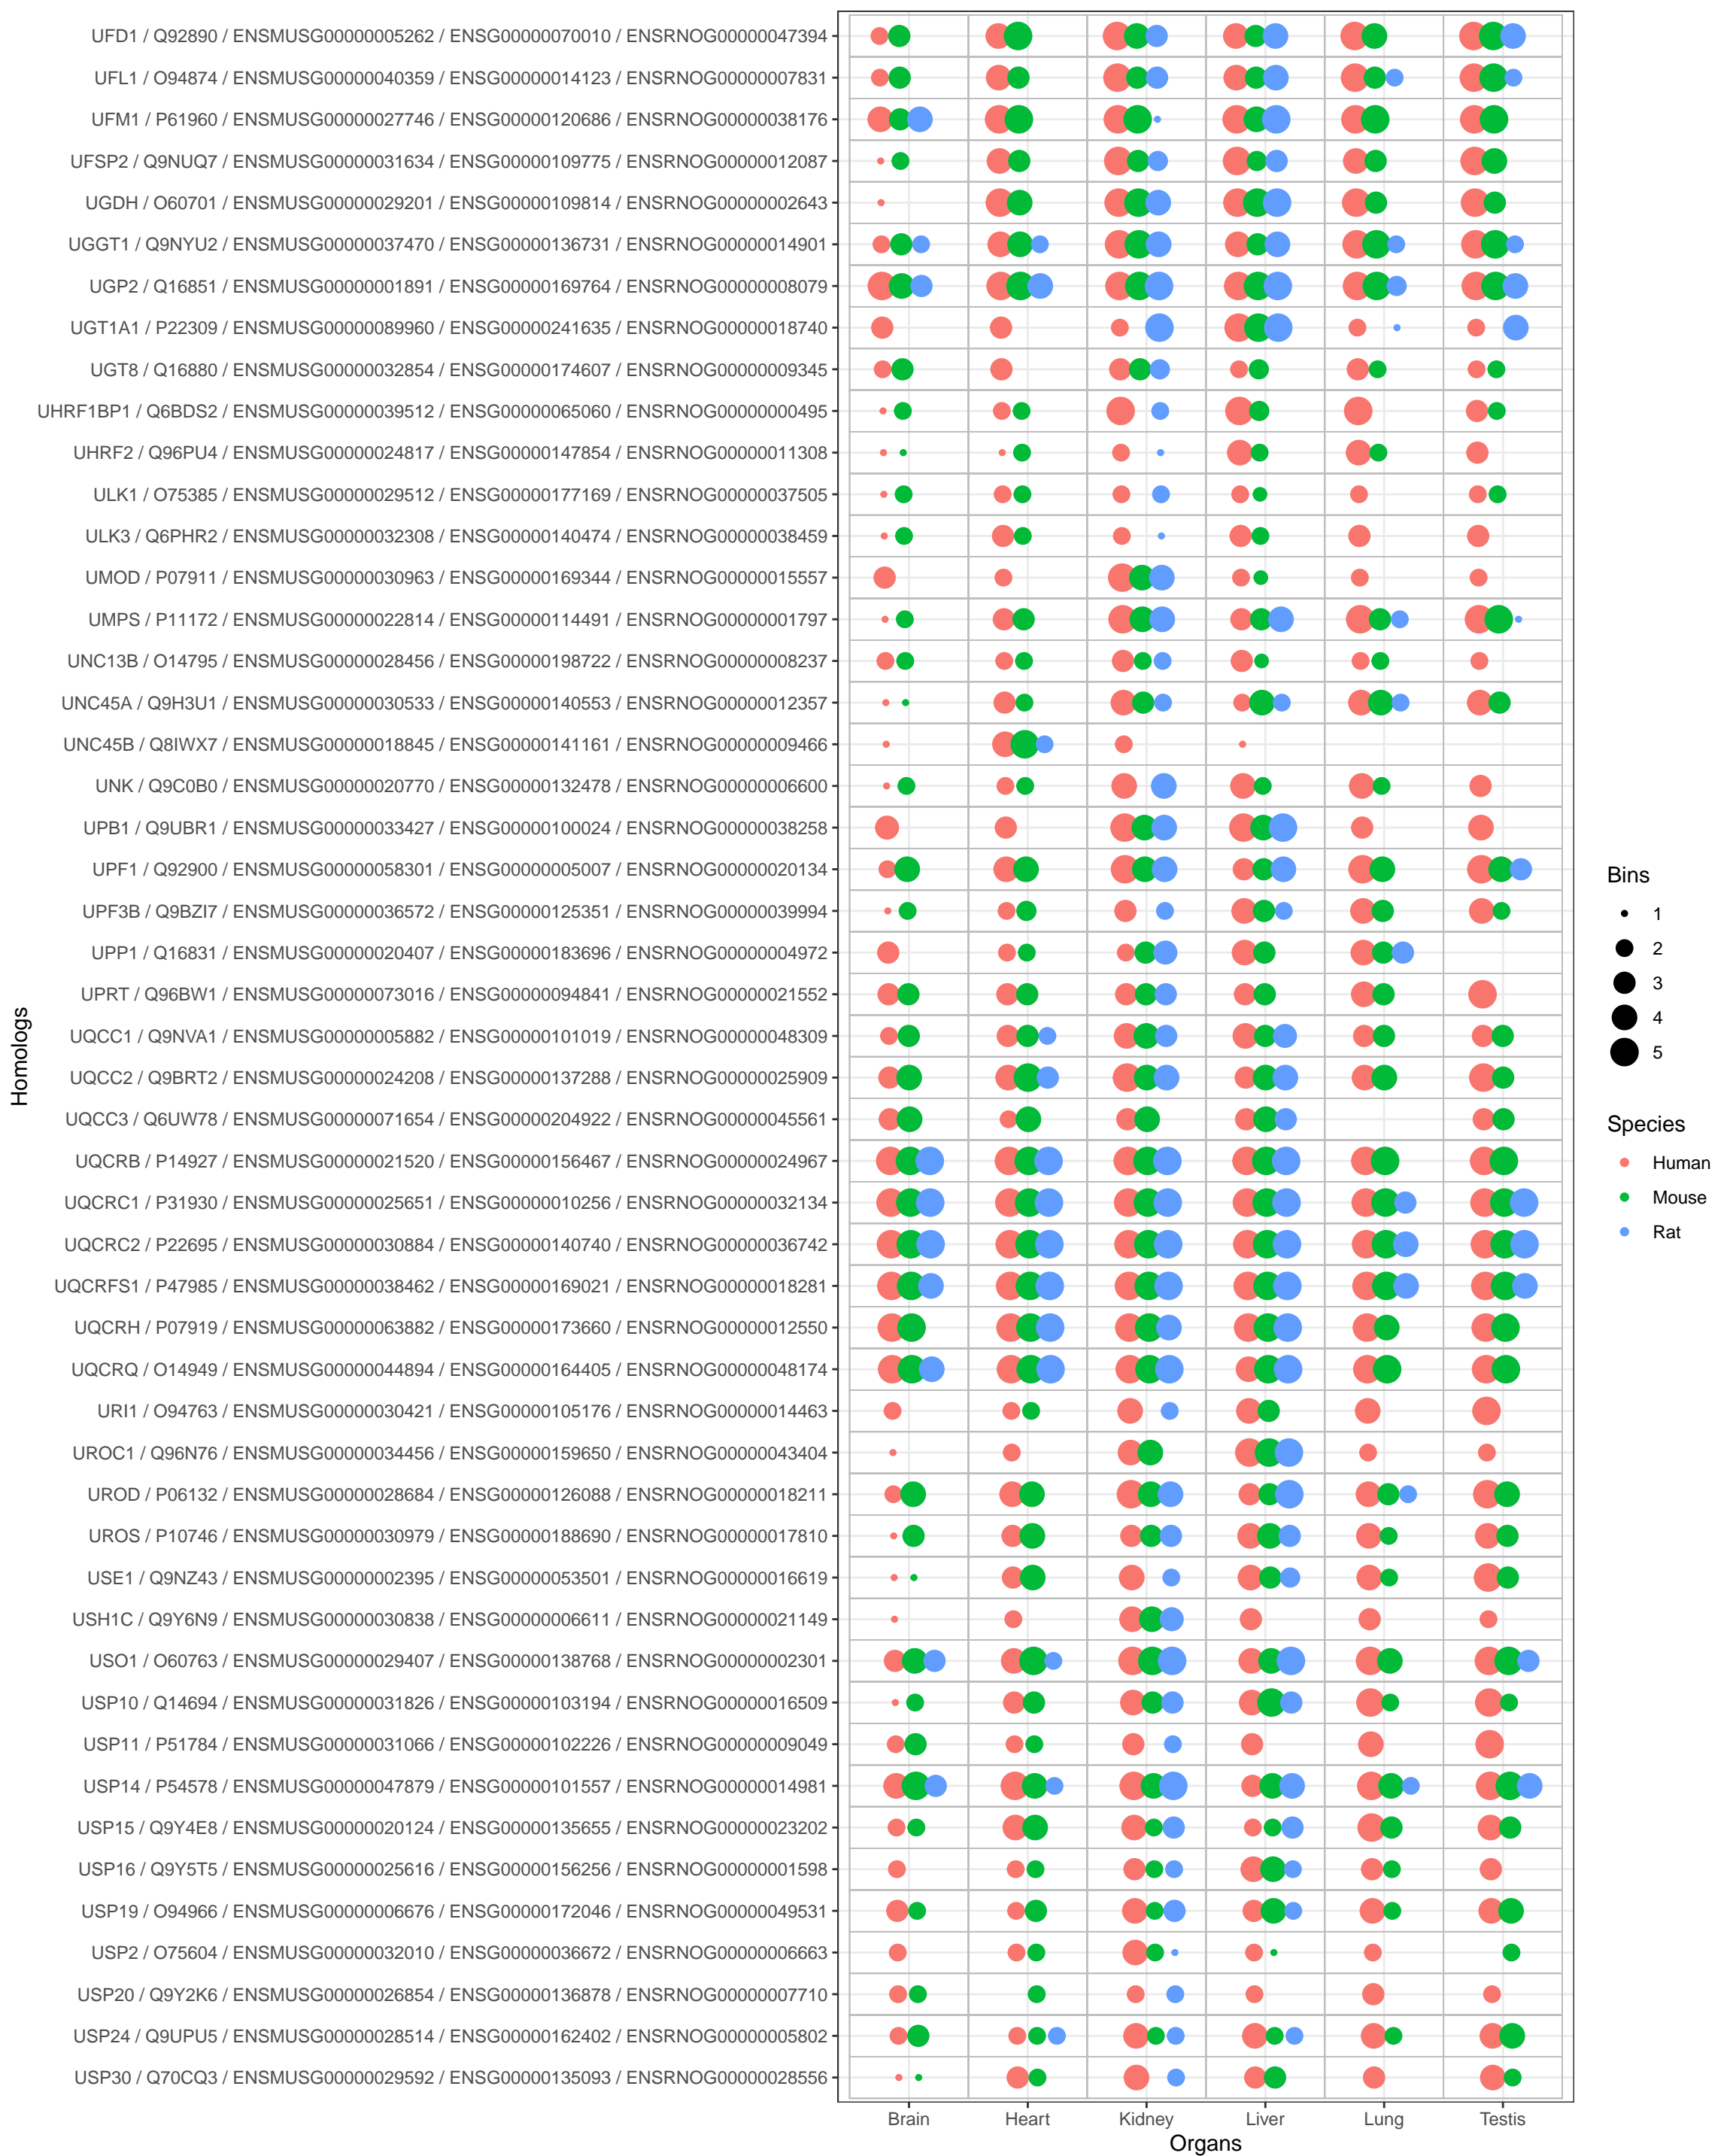



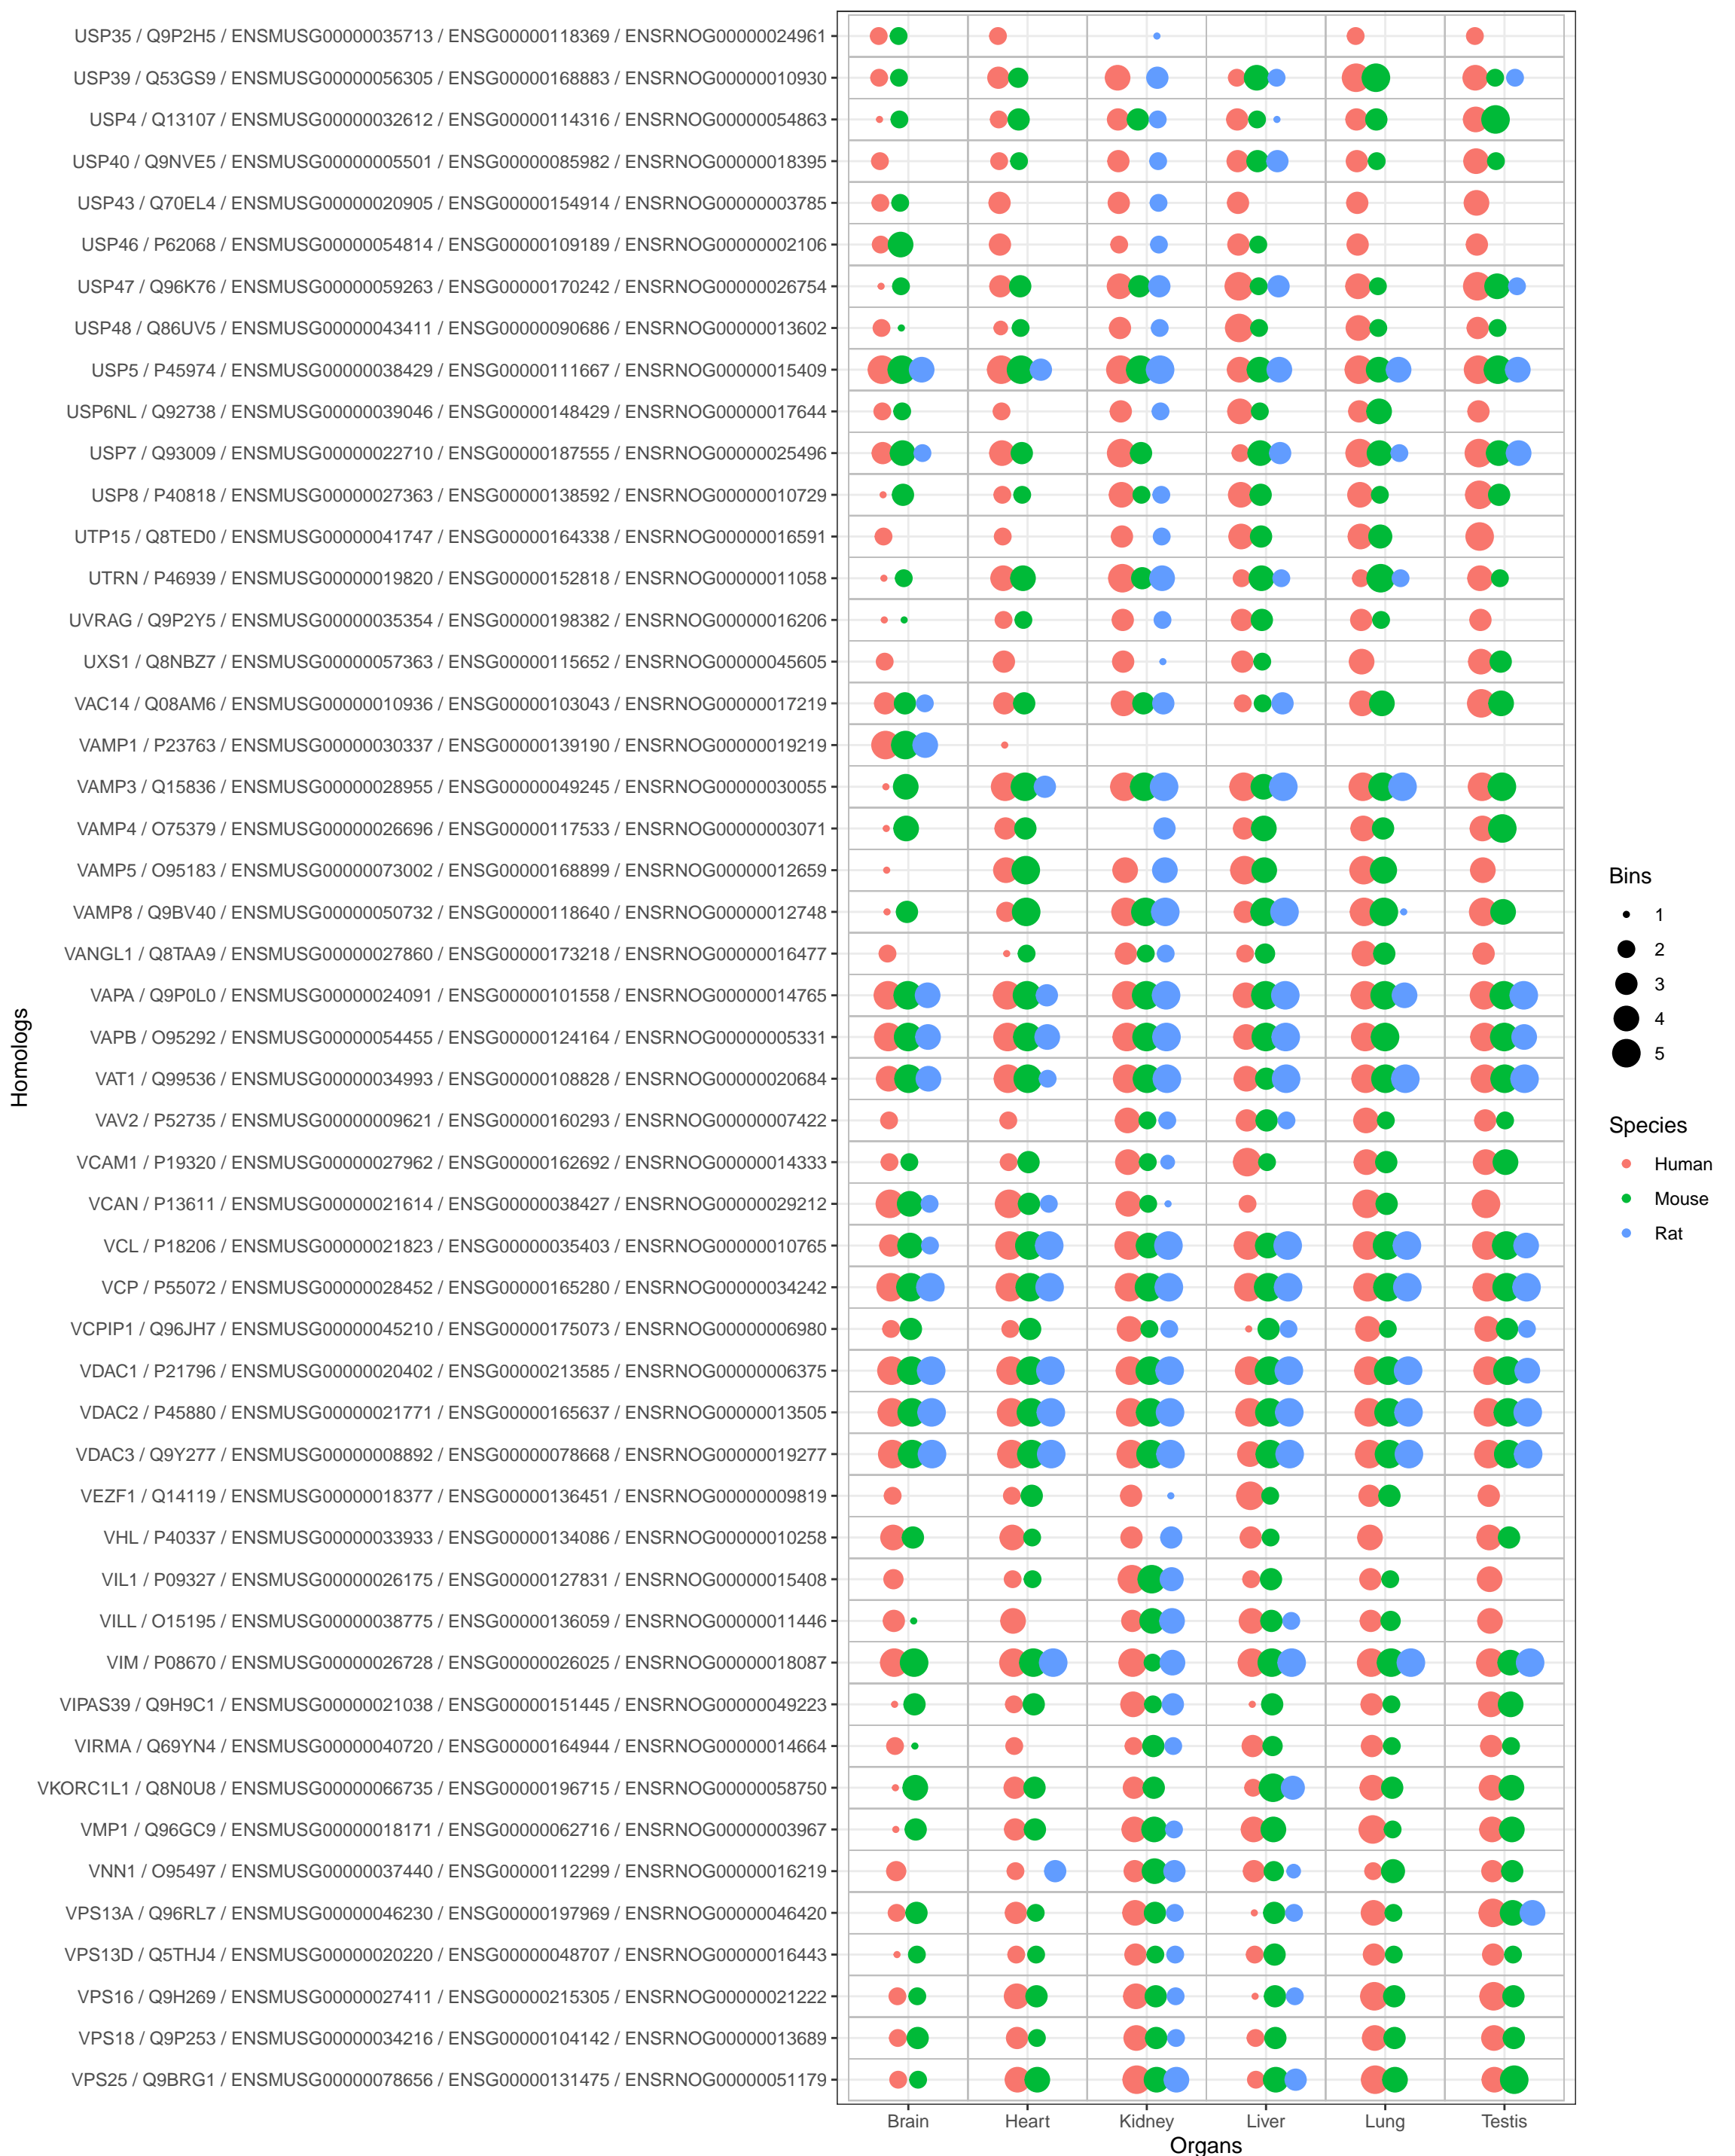

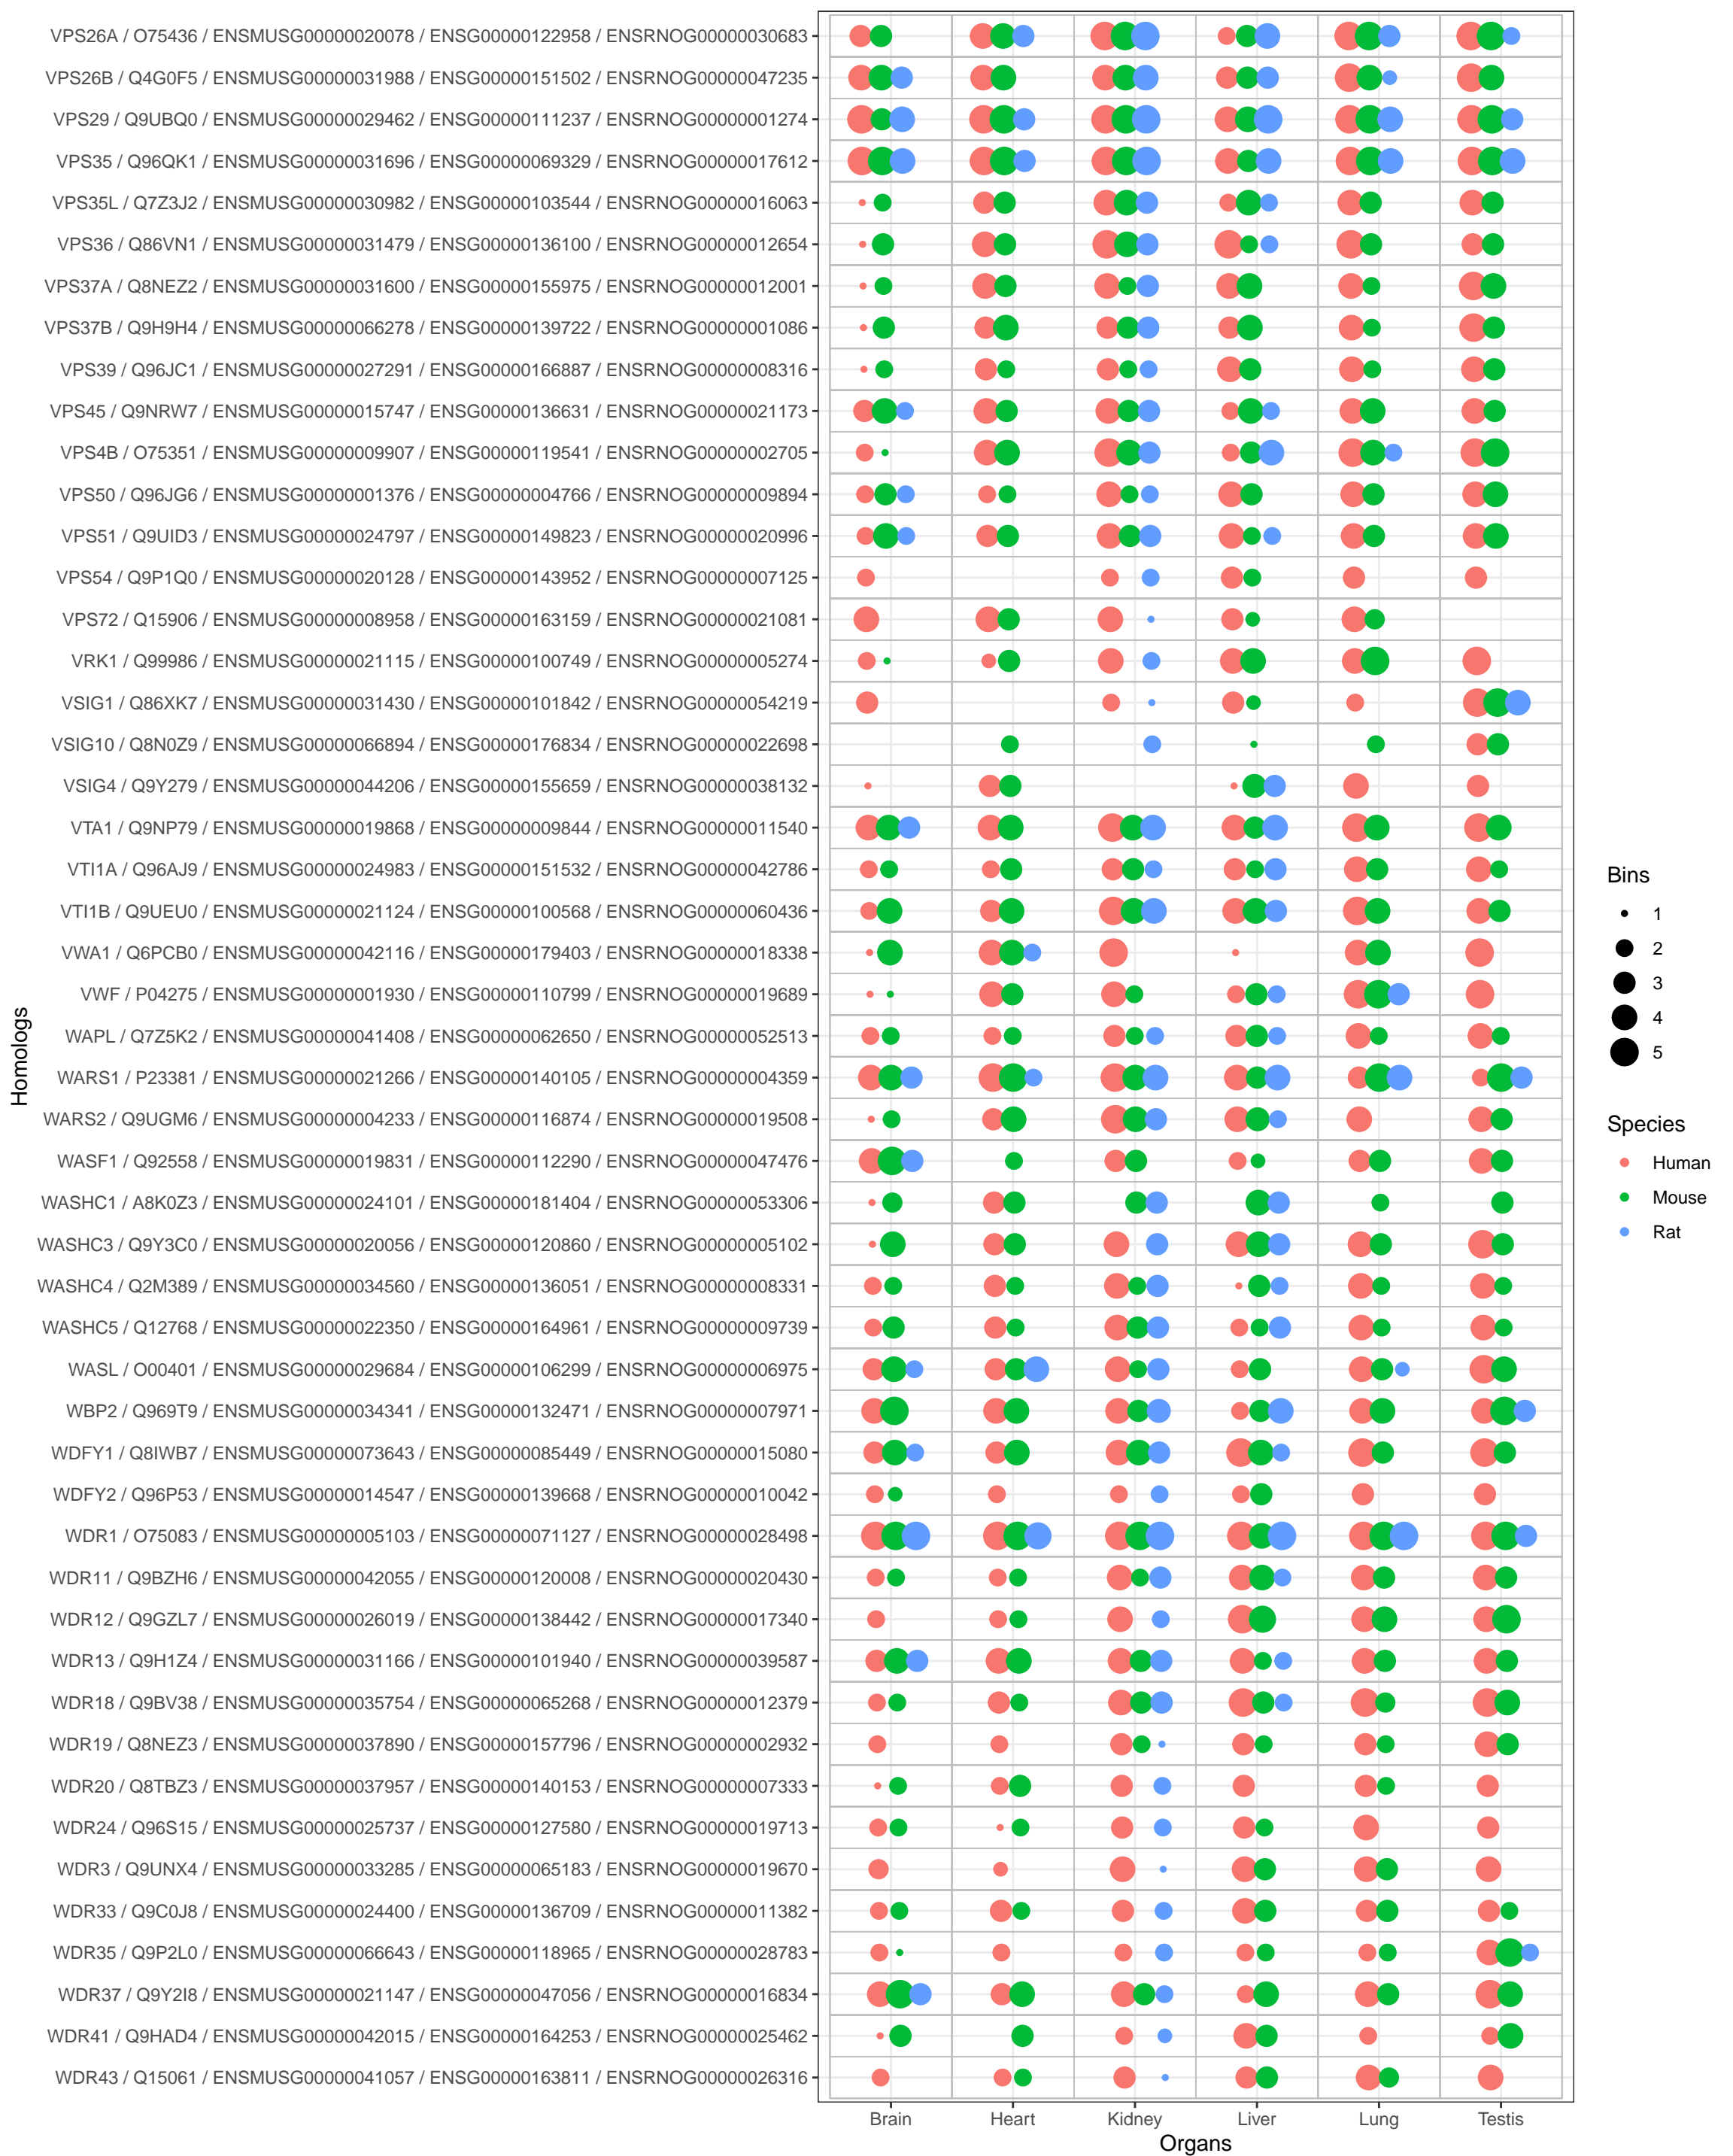

Homologs

WDR44 / Q5JSH3 / ENSMUSG00000036769 / ENSG00000131725 / ENSRNOG00000029068  
WDR45 / Q9Y484 / ENSMUSG00000039382 / ENSG00000196998 / ENSRNOG00000009749  
WDR45B / Q5MNZ6 / ENSMUSG00000025173 / ENSG00000141580 / ENSRNOG00000036662  
WDR47 / O94967 / ENSMUSG00000040389 / ENSG00000085433 / ENSRNOG00000020330  
WDR48 / Q8TAF3 / ENSMUSG00000032512 / ENSG00000114742 / ENSRNOG00000016942  
WDR5 / P61964 / ENSMUSG00000026917 / ENSG00000196363 / ENSRNOG00000008212  
WDR59 / Q6PJ19 / ENSMUSG00000031959 / ENSG00000103091 / ENSRNOG00000018967  
WDR6 / Q9NNW5 / ENSMUSG00000066357 / ENSG00000178252 / ENSRNOG00000020185  
WDR61 / Q9GZS3 / ENSMUSG00000061559 / ENSG00000140395 / ENSRNOG00000012803  
WDR62 / O43379 / ENSMUSG00000037020 / ENSG00000075702 / ENSRNOG00000020807  
WDR7 / Q9Y4E6 / ENSMUSG00000040560 / ENSG00000091157 / ENSRNOG00000018387  
WDR70 / Q9NW82 / ENSMUSG00000039828 / ENSG00000082068 / ENSRNOG00000013336  
WDR77 / Q9BQA1 / ENSMUSG00000000561 / ENSG00000116455 / ENSRNOG00000016394  
WDR91 / A4D1P6 / ENSMUSG00000058486 / ENSG00000105875 / ENSRNOG00000010421  
WDTC1 / Q8N5D0 / ENSMUSG00000037622 / ENSG00000142784 / ENSRNOG00000008377  
WFDC2 / Q14508 / ENSMUSG00000017723 / ENSG00000101443 / ENSRNOG00000014739  
WHAMM / Q8TF30 / ENSMUSG00000045795 / ENSG00000156232 / ENSRNOG00000028113  
WIPF2 / Q8TF74 / ENSMUSG00000038013 / ENSG00000171475 / ENSRNOG00000027849  
WIPI1 / Q5MNZ9 / ENSMUSG00000041895 / ENSG00000070540 / ENSRNOG00000003827  
WIPI2 / Q9Y4P8 / ENSMUSG00000029578 / ENSG00000157954 / ENSRNOG00000001114  
WIZ / O95785 / ENSMUSG00000024050 / ENSG00000011451 / ENSRNOG00000006217  
WLS / Q5T9L3 / ENSMUSG00000028173 / ENSG00000116729 / ENSRNOG00000036816  
WNK1 / Q9H4A3 / ENSMUSG00000045962 / ENSG00000060237 / ENSRNOG00000009956  
WNK2 / Q9Y3S1 / ENSMUSG00000037989 / ENSG00000165238 / ENSRNOG00000016684  
WRN / Q14191 / ENSMUSG00000031583 / ENSG00000165392 / ENSRNOG00000015440  
WRNIP1 / Q96S55 / ENSMUSG00000021400 / ENSG00000124535 / ENSRNOG00000017040  
WTAP / Q15007 / ENSMUSG00000060475 / ENSG00000146457 / ENSRNOG00000019091  
WWC1 / Q8IX03 / ENSMUSG00000018849 / ENSG00000113645 / ENSRNOG00000008065  
WWC2 / Q6AWC2 / ENSMUSG00000031563 / ENSG00000151718 / ENSRNOG00000013248  
WWP1 / Q9H0M0 / ENSMUSG00000041058 / ENSG00000123124 / ENSRNOG00000006328  
WWTR1 / Q9GZV5 / ENSMUSG00000027803 / ENSG00000018408 / ENSRNOG00000016617  
XAB2 / Q9HCS7 / ENSMUSG00000019470 / ENSG00000076924 / ENSRNOG00000000988  
XDH / P47989 / ENSMUSG00000024066 / ENSG00000158125 / ENSRNOG00000007081  
XIAP / P98170 / ENSMUSG00000025860 / ENSG00000101966 / ENSRNOG00000006967  
XIRP2 / A4UGR9 / ENSMUSG00000027022 / ENSG00000163092 / ENSRNOG00000034258  
XPC / Q01831 / ENSMUSG00000030094 / ENSG00000154767 / ENSRNOG00000008274  
XPNPEP1 / Q9NQW7 / ENSMUSG00000025027 / ENSG00000108039 / ENSRNOG00000012084  
XPNPEP2 / O43895 / ENSMUSG00000037005 / ENSG00000122121 / ENSRNOG00000004009  
XPNPEP3 / Q9NQH7 / ENSMUSG00000022401 / ENSG00000196236 / ENSRNOG00000019196  
XPO1 / O14980 / ENSMUSG00000020290 / ENSG00000082898 / ENSRNOG00000009935  
XPO4 / Q9C0E2 / ENSMUSG00000021952 / ENSG00000132953 / ENSRNOG00000010137  
XPO5 / Q9HAV4 / ENSMUSG00000067150 / ENSG00000124571 / ENSRNOG00000019085  
XPO7 / Q9UIA9 / ENSMUSG00000022100 / ENSG00000130227 / ENSRNOG00000013288  
XPOT / O43592 / ENSMUSG00000034667 / ENSG00000184575 / ENSRNOG00000007088  
XPR1 / Q9UBH6 / ENSMUSG00000026469 / ENSG00000143324 / ENSRNOG00000000042  
XRCC1 / P18887 / ENSMUSG00000051768 / ENSG00000073050 / ENSRNOG00000019915  
XRCC4 / Q13426 / ENSMUSG00000021615 / ENSG00000152422 / ENSRNOG00000029966  
XRCC6 / P12956 / ENSMUSG00000022471 / ENSG00000196419 / ENSRNOG00000006392  
XRN1 / Q8IZH2 / ENSMUSG00000032410 / ENSG00000114127 / ENSRNOG000000042951  
XRN2 / Q9H0D6 / ENSMUSG00000027433 / ENSG00000088930 / ENSRNOG00000011785

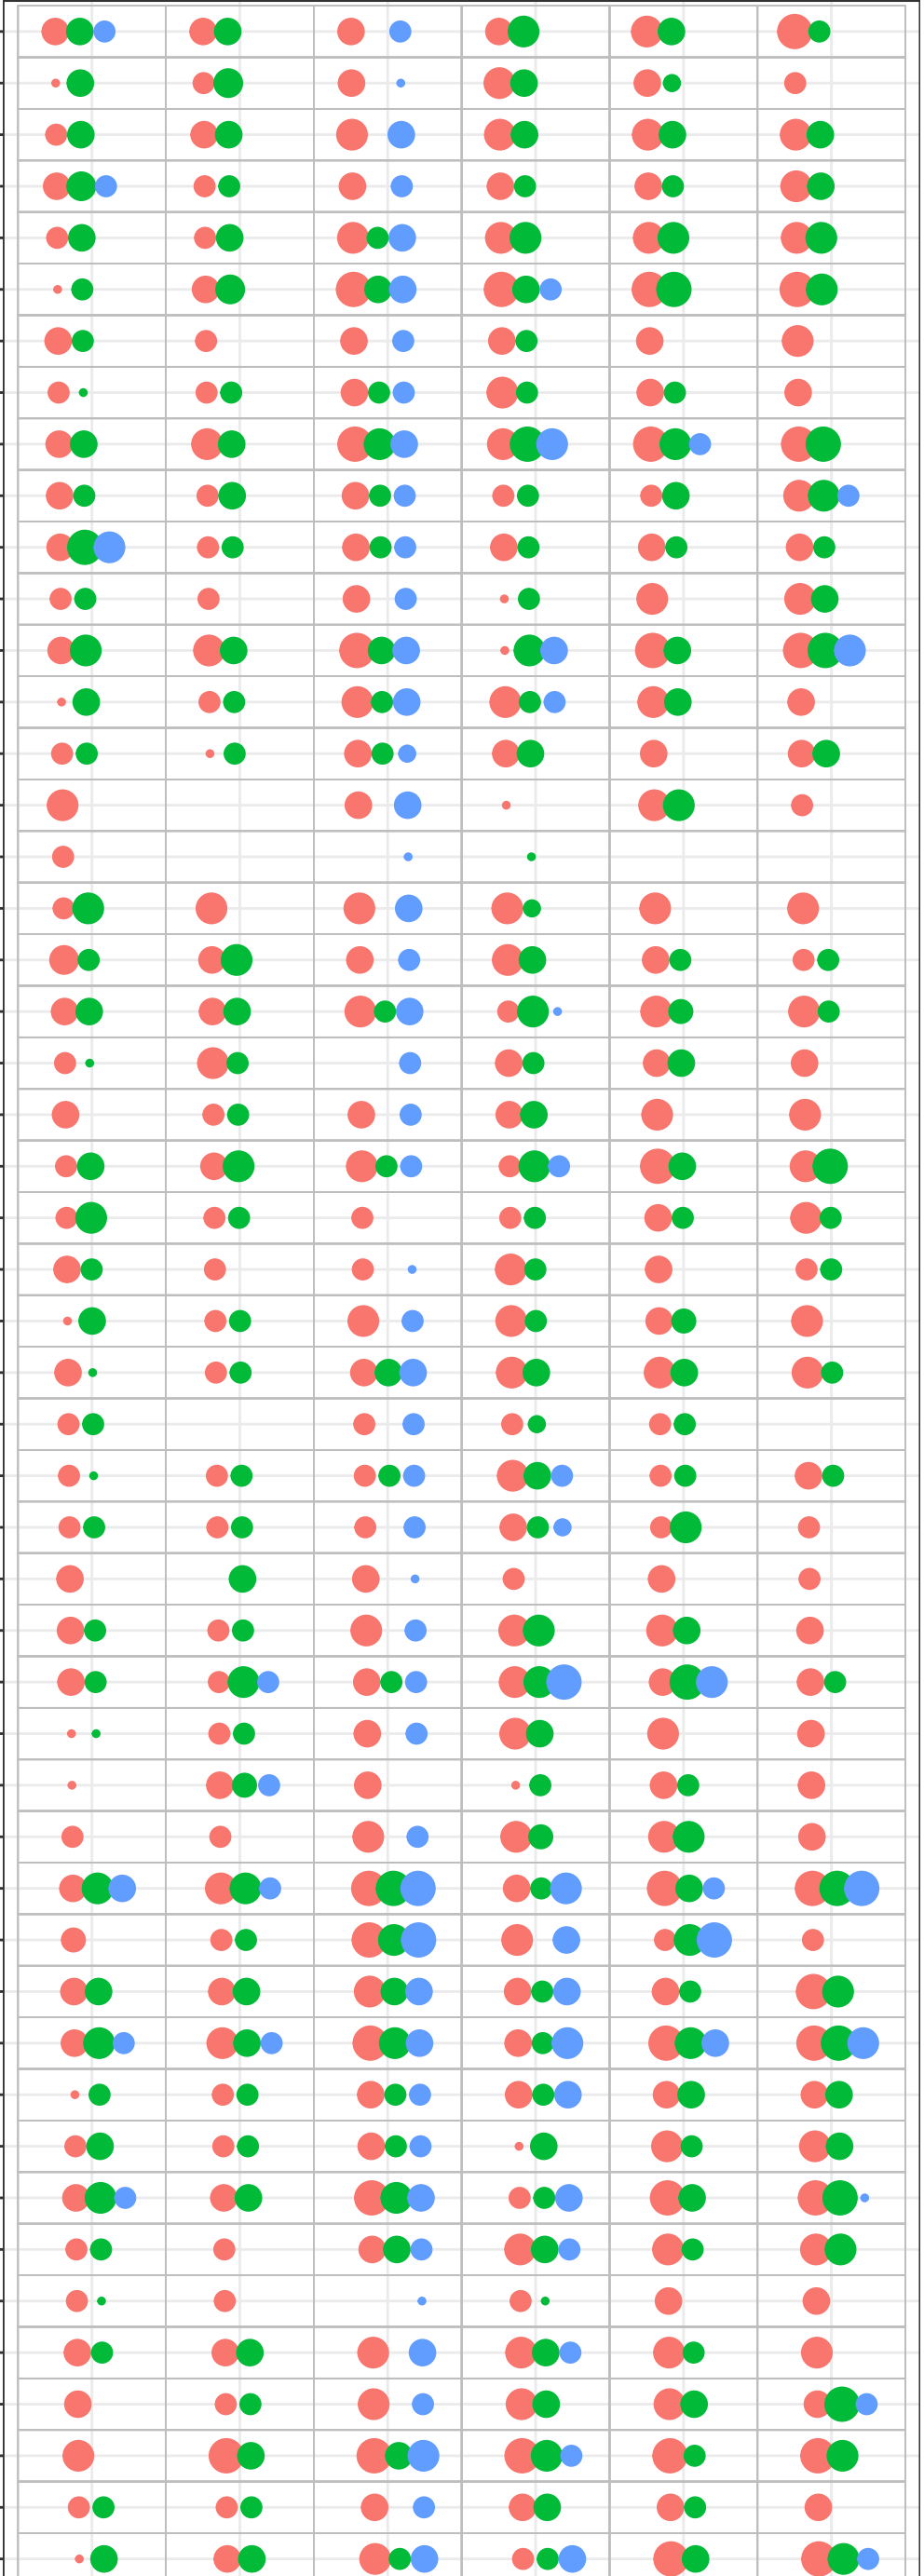

Bins



Species



Organs



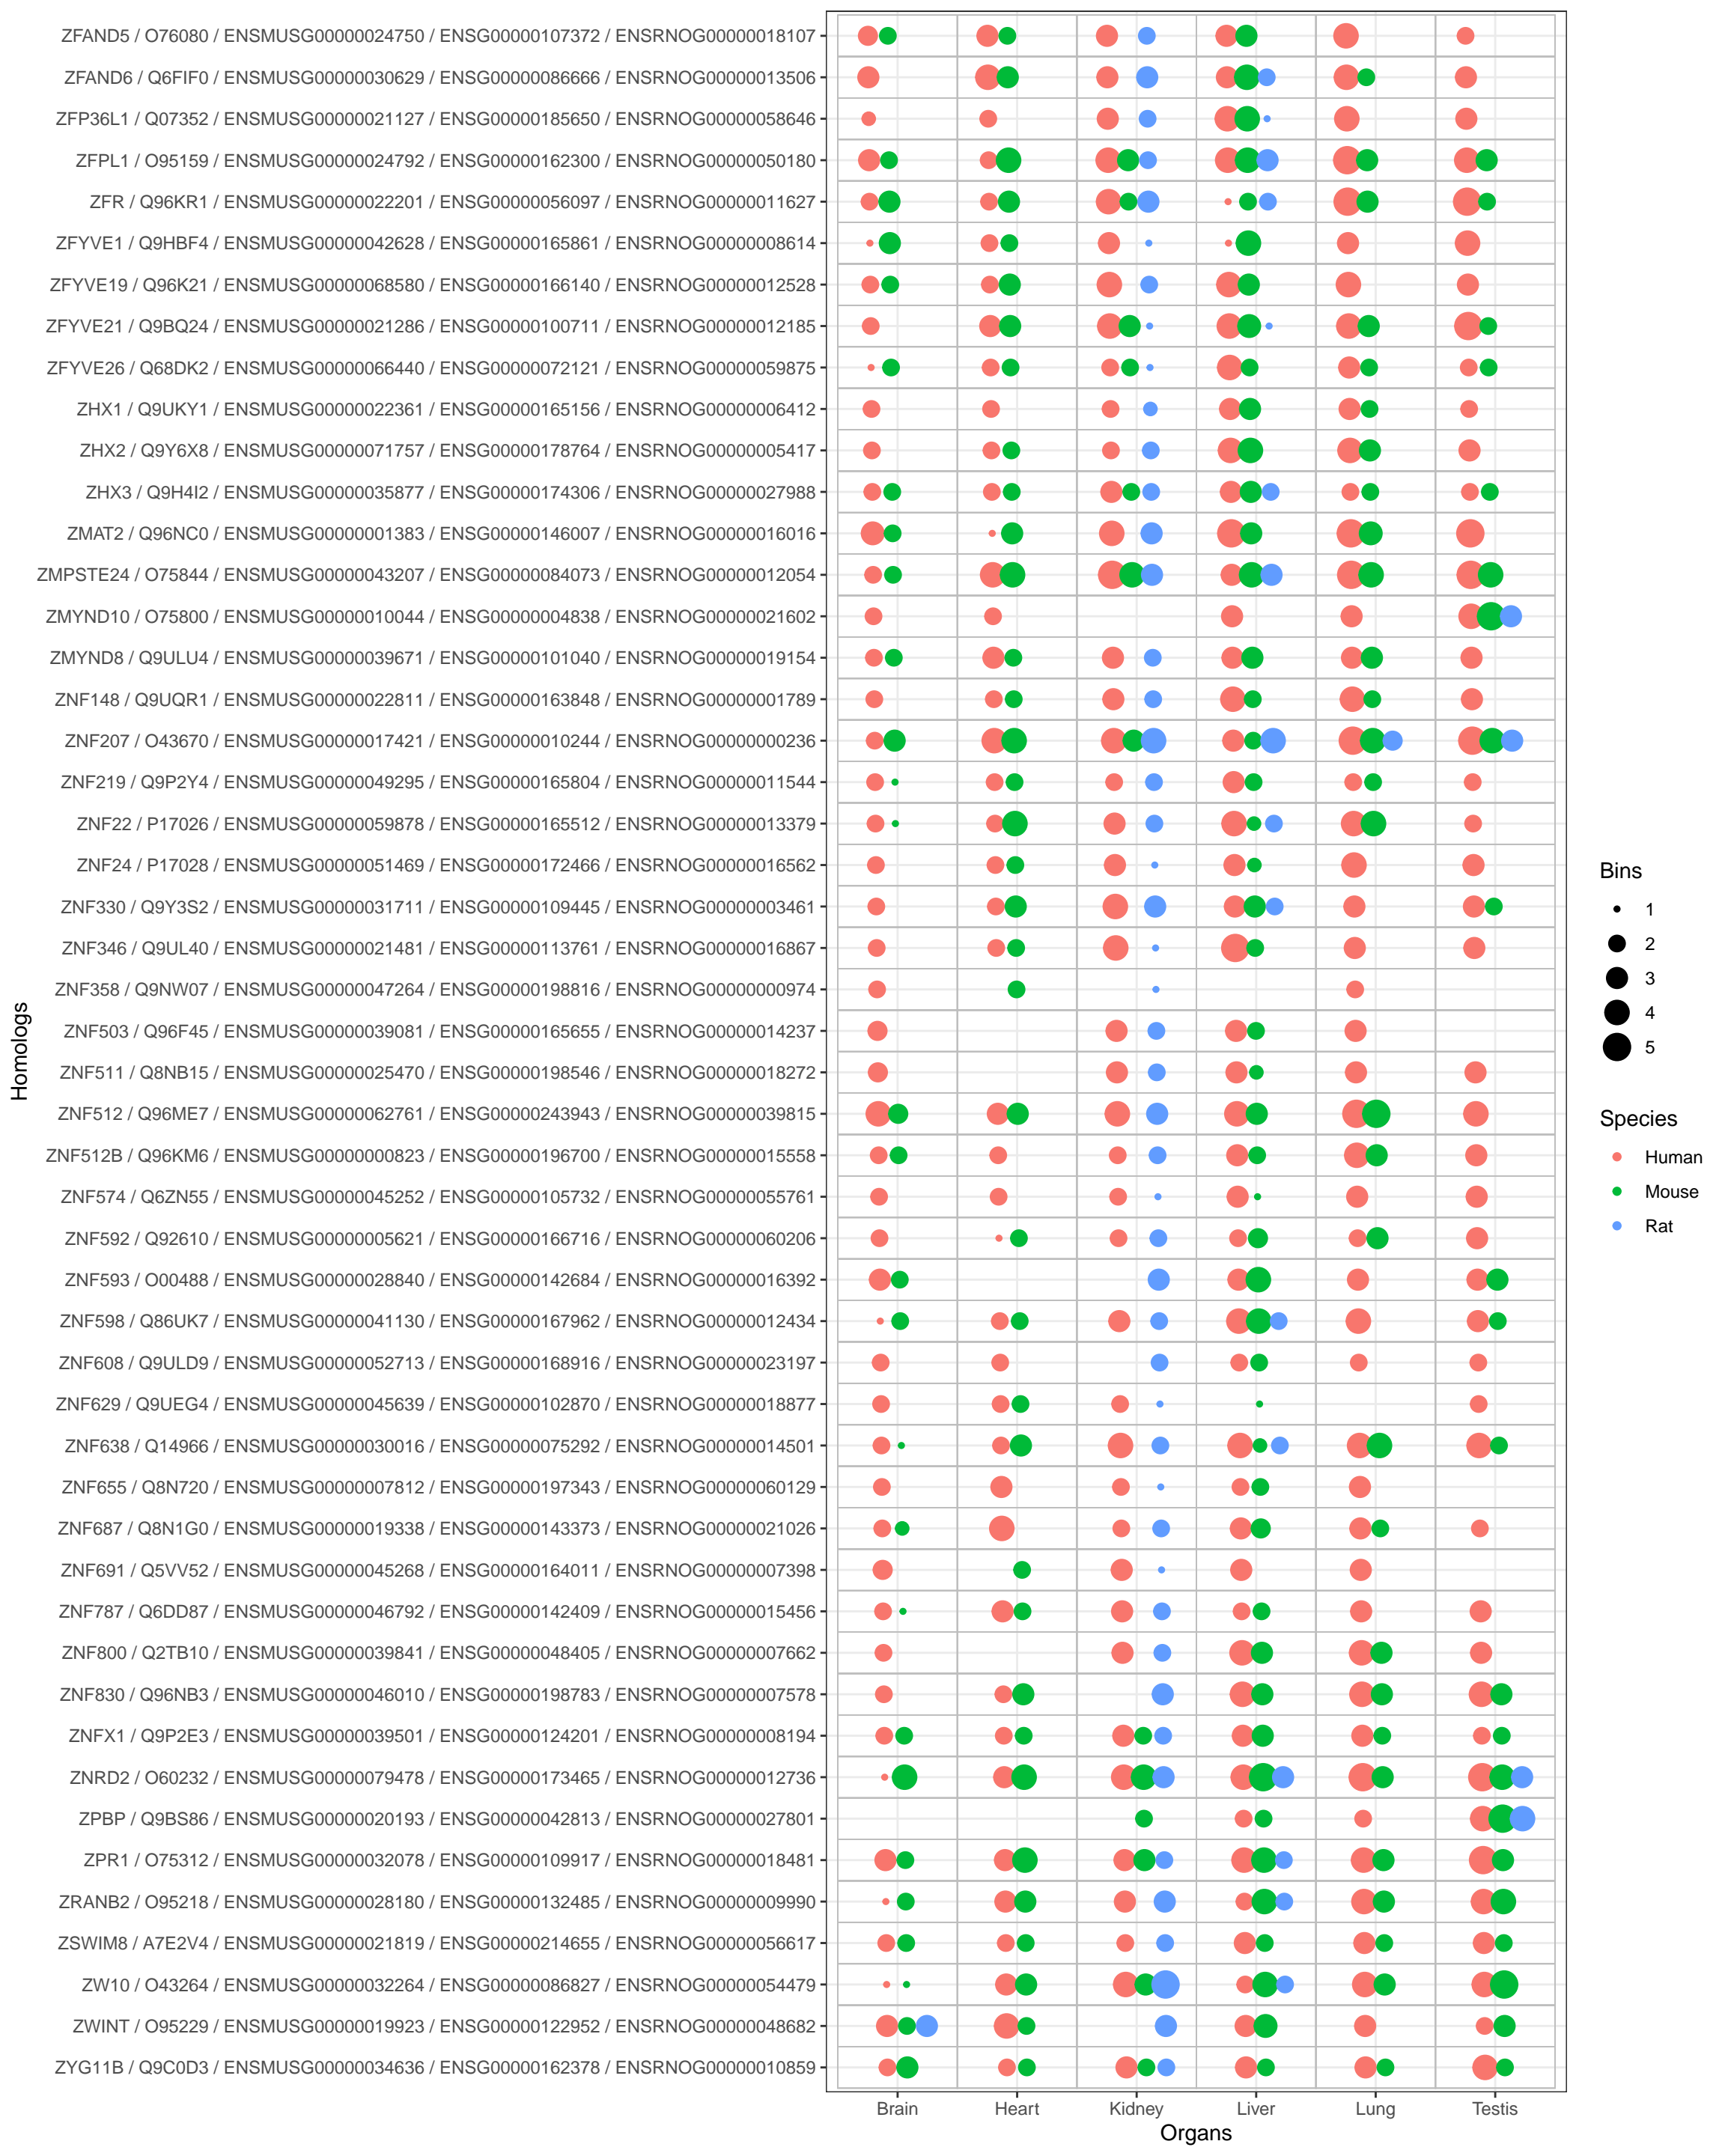

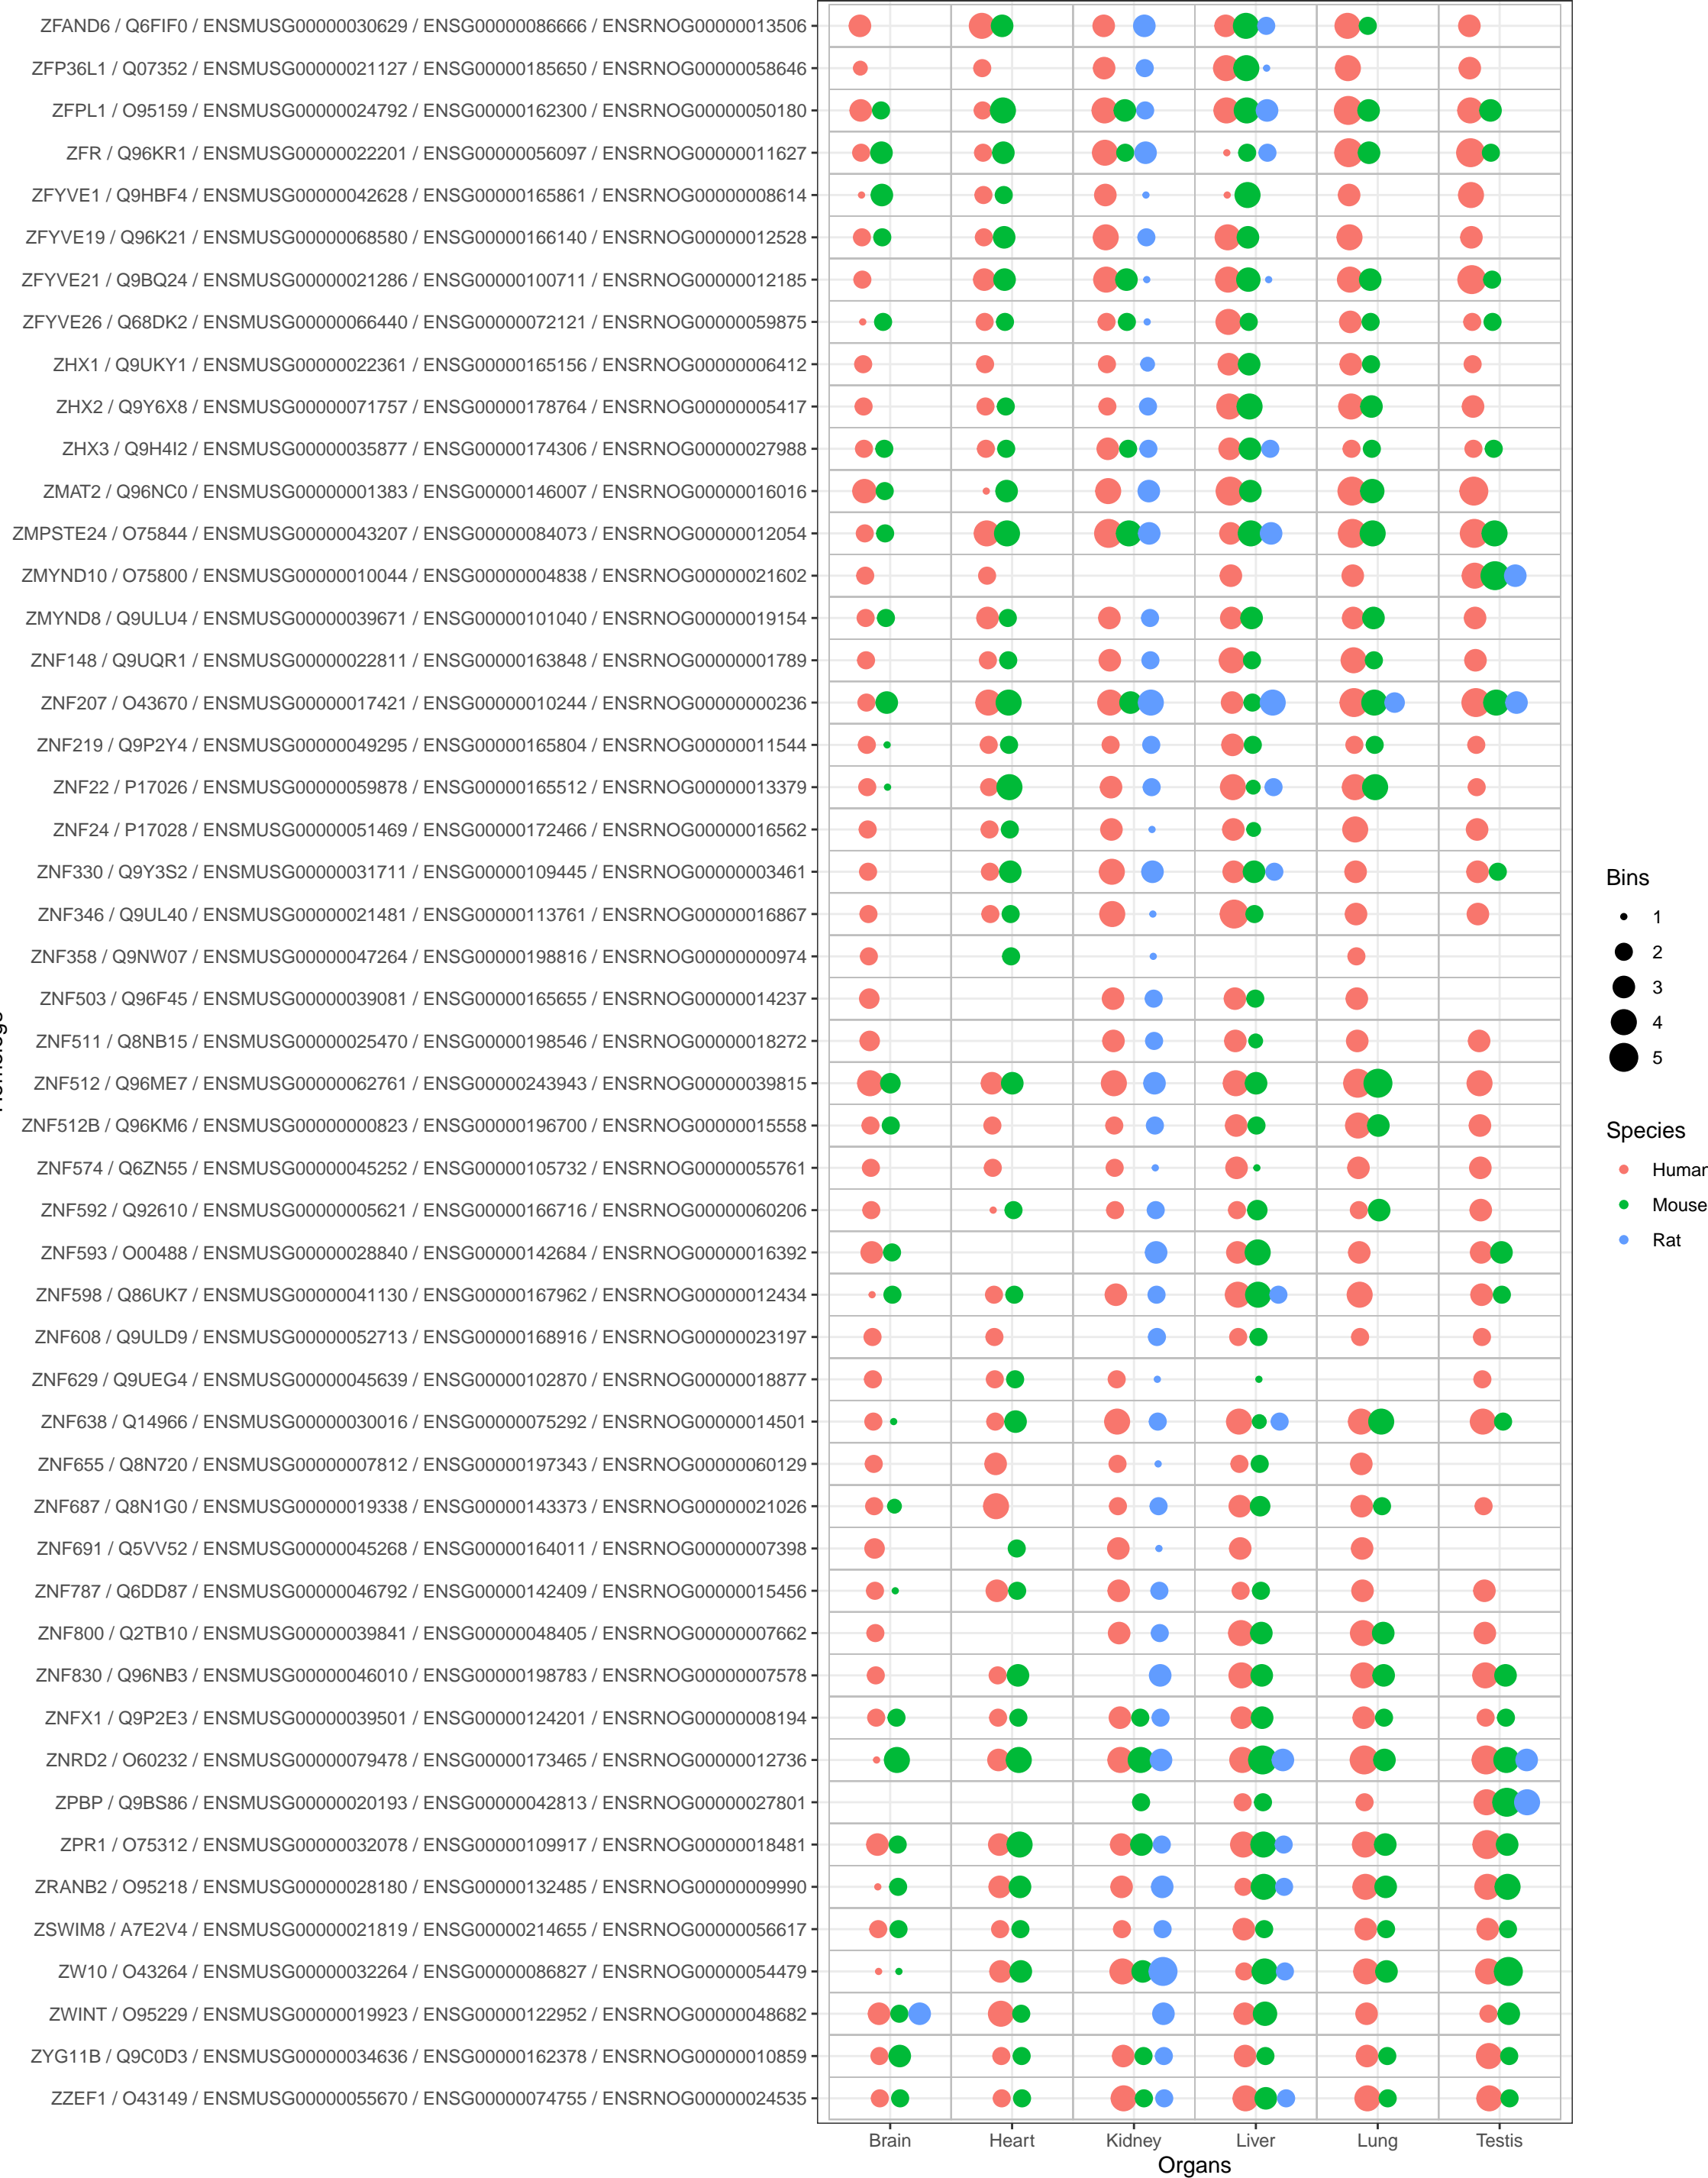

Supplement: pcbi.1010174.s008.pdf [file pcbi.1010174.s008.pdf]
