# Supplementary material for: Integrated view and comparative analysis of baseline protein expression in mouse and rat tissues
Source: PubMed Central journal article supplement (PMC9246241; doi:10.1371/journal.pcbi.1010174), 2022-06-17
Supplement: pcbi.1010174.s004.pdf [file pcbi.1010174.s004.pdf]

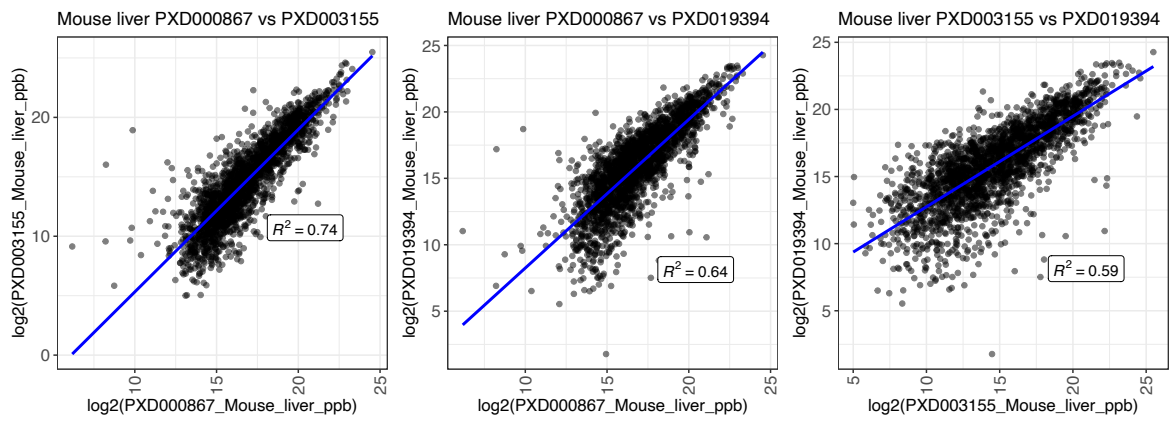

**Supplementary Figure A.** Correlation of protein expression between datasets for mouse liver.

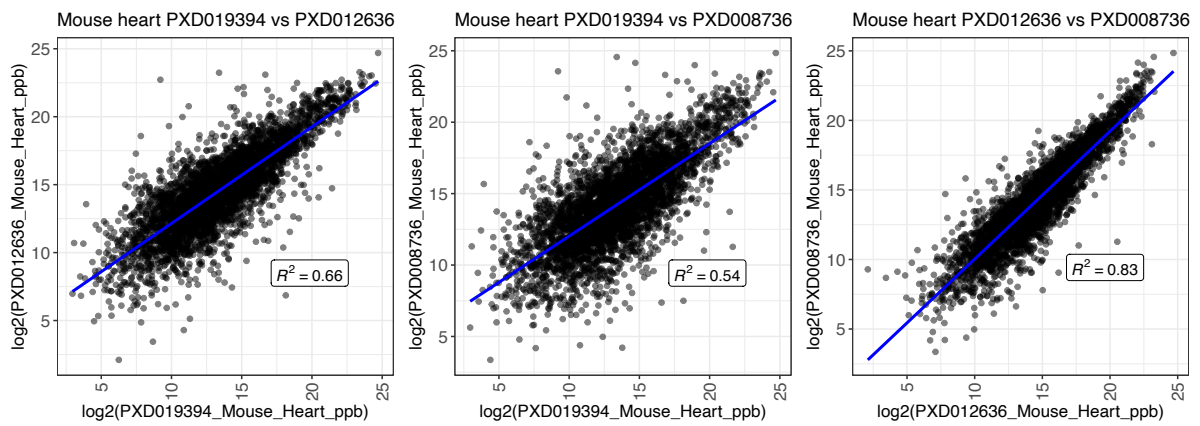

**Supplementary Figure B.** Correlation of protein expression between datasets for mouse heart.

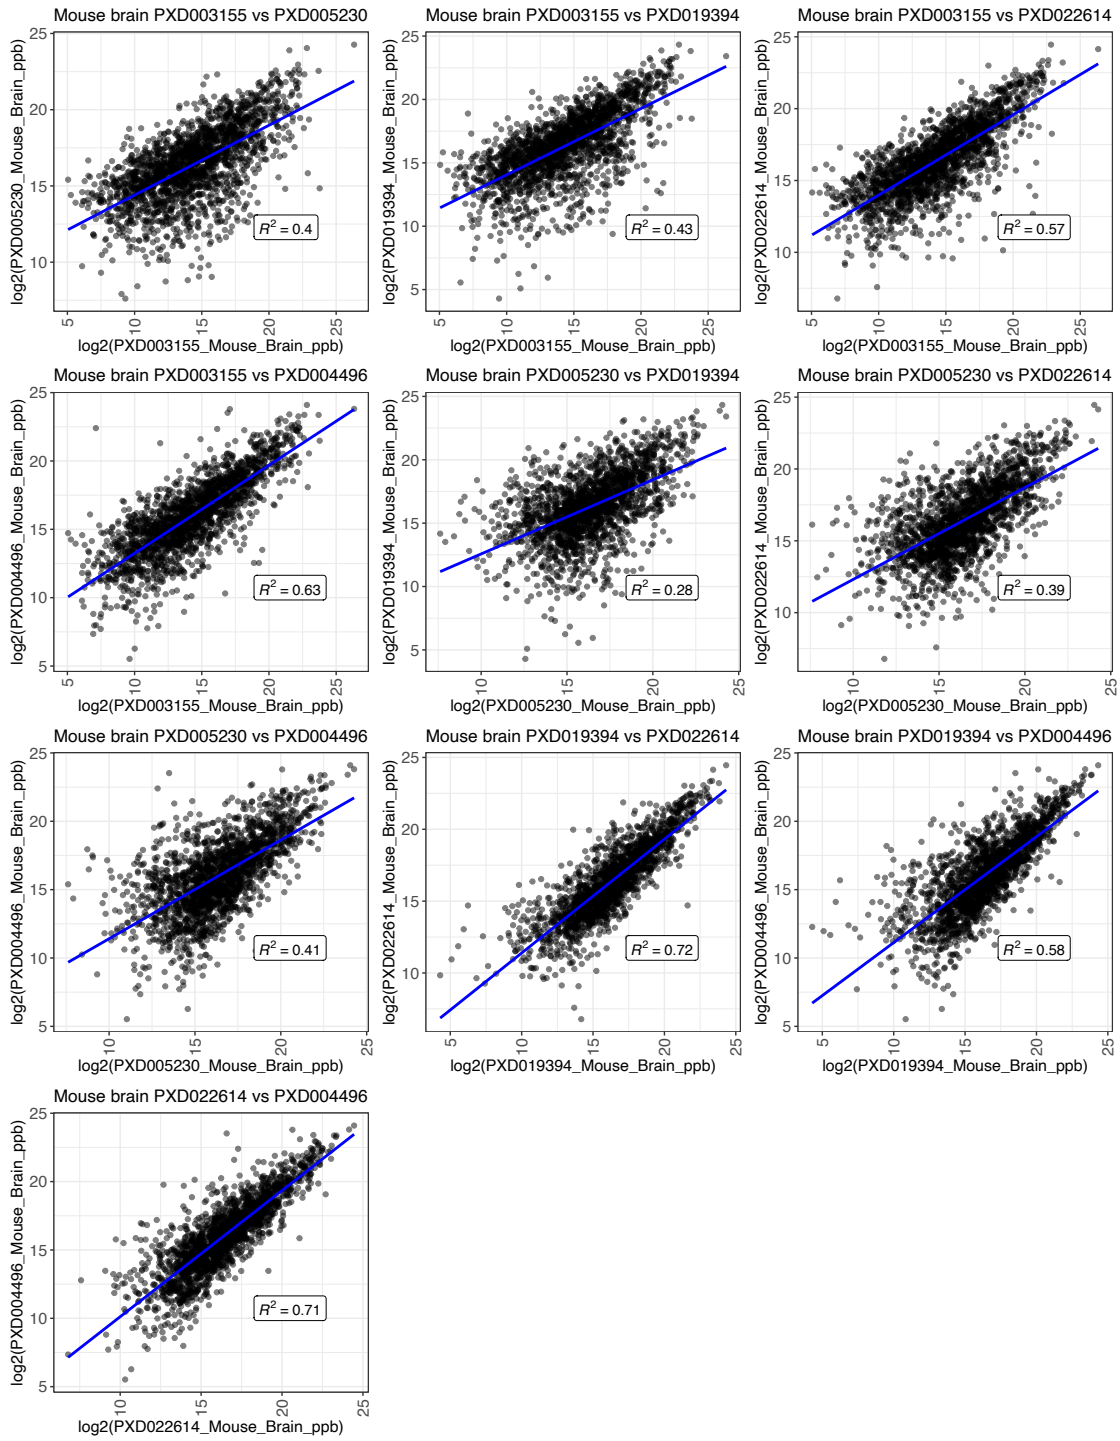

**Supplementary Figure C.** Correlation of protein expression between datasets for mouse brain.

Rat heart PXD001839 vs PXD013543

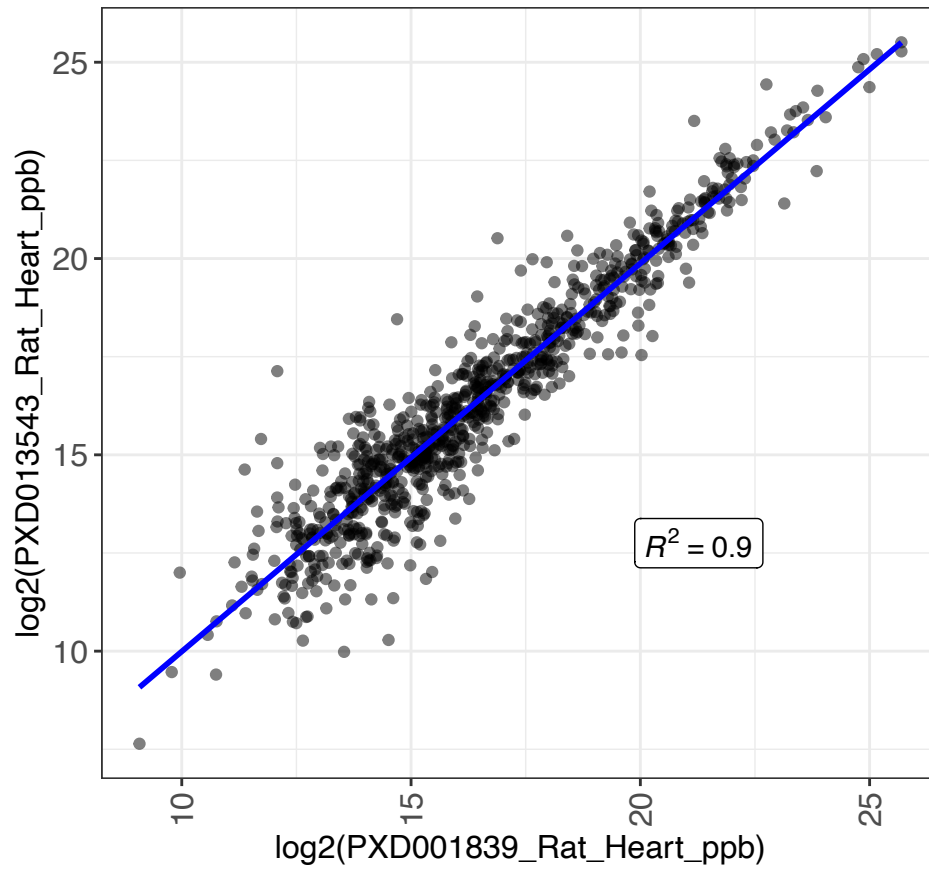

**Supplementary Figure D.** Correlation of protein expression between datasets for rat heart.

Mouse protein abundance comparison (Wang et al 2021 vs PaxDB)

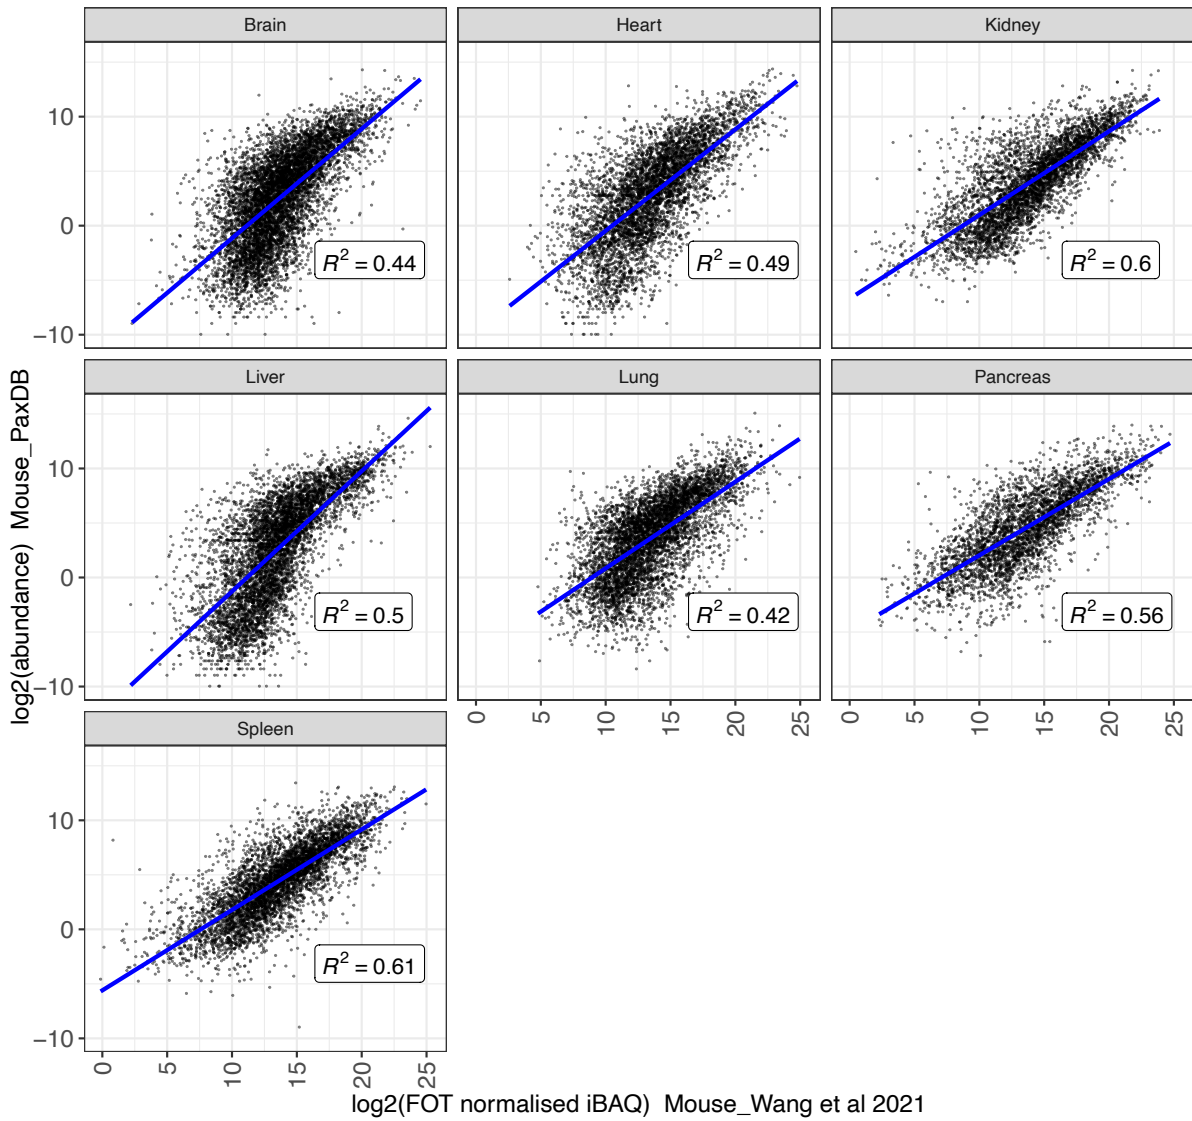

**Supplementary Figure E.** Comparison of mouse protein abundances in various organs between this study (iBAQ) and PaxDB (spectral counting).

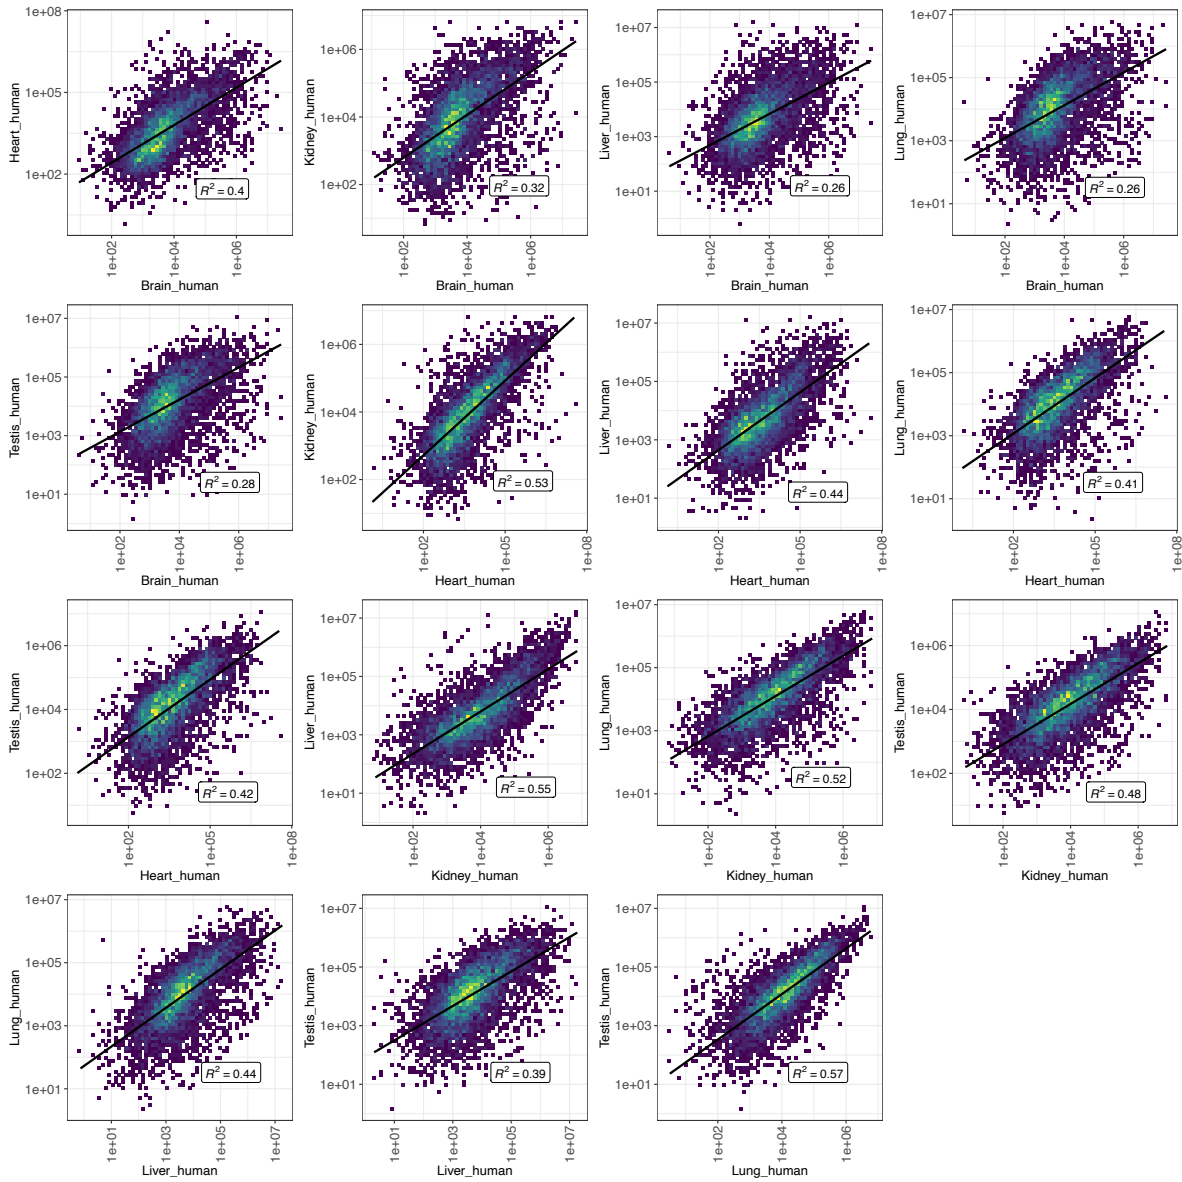

**Supplementary Figure F.** Correlation of protein expression between organs within human.

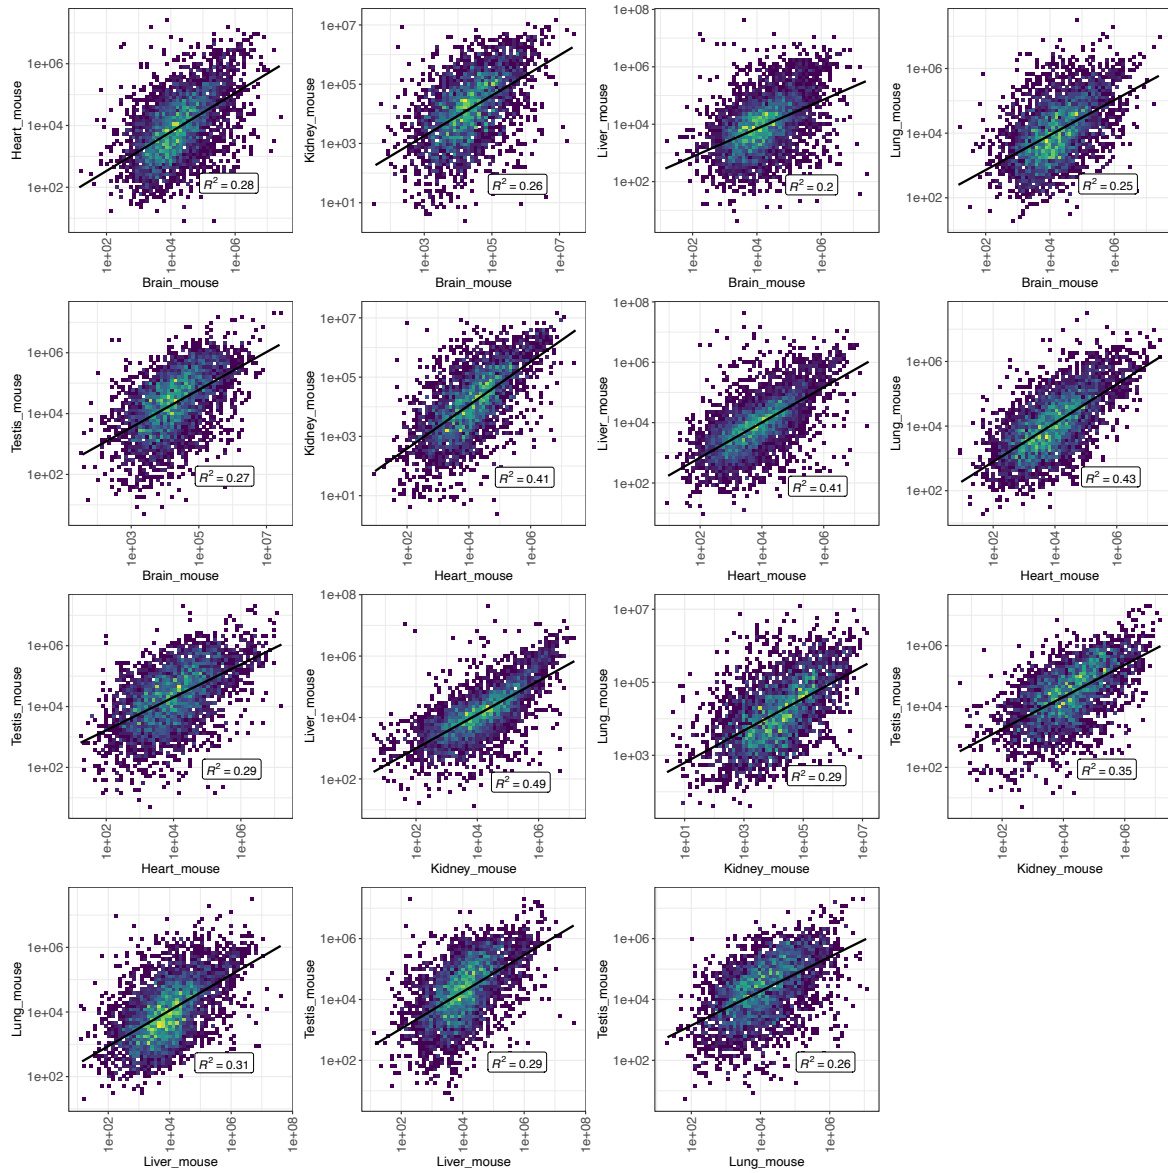

Supplementary Figure G. Correlation of protein expression between organs within mouse.

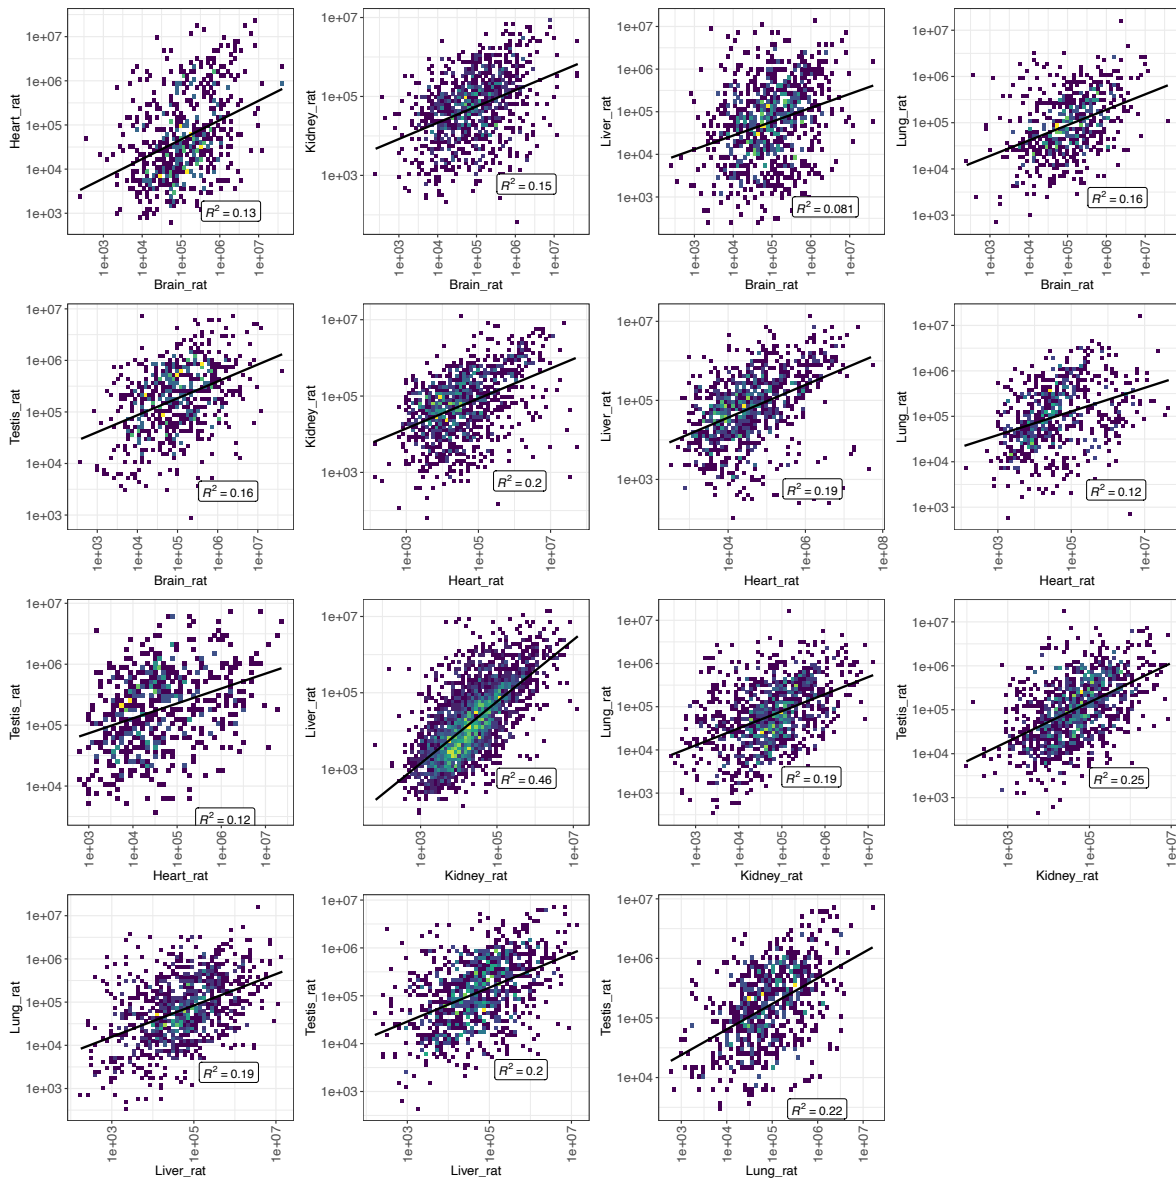

**Supplementary Figure H.** Correlation of protein expression between organs within rat.
